# Supplementary material for: Dendritic sodium spikes are required for long-term potentiation at distal synapses on hippocampal pyramidal neurons
Source: eLife. 2015 Aug 6;4:e06414. doi: 10.7554/eLife.06414 (PMC4576155; doi:10.7554/eLife.06414)
Supplement: Figure 2—source data 2. — DOI: http://dx.doi.org/10.7554/eLife.06414.009 [file elife06414s004.xlsx]

## Sheet: Figure 2S1
Panel A	Stim. #											Panel B	Stim. #
	1	8.63515	7.19708	6.12538	6.49683	8.0211	5.63011	5.64246	5.90543	7.16672			1	3.50229	2.91165	1.71492	2.42458	1.87555	1.71812	2.05191	2.55438	2.00569
	2	45.0759	42.5875	12.5947	18.1168	13.5906	12.9762	9.93315	12.3732	13.8076			2			3.41139	6.84548	1.93625	2.71808	1.95923	5.30786	2.65986
	3	21.3441	24.7673	22.5053	23.156	15.1219	17.3482	10.7751	14.0023	21.6993			3	1.8481	2.19771	5.51617	5.34459	0.923602	1.44157	0.928139	1.59342	2.42731
	4	26.5278	59.542	27.4673	24.7578	19.0086	19.7866	11.0178	18.129	27.3898			4	1.31696		1.83364	4.6244	1.55304	0.982707	1.04135	1.25088	1.11141
	5	27.2156	57.235	71.6211	26.4108	18.1131	65.3812	10.7066	63.1078	64.6652			5	0.676555			2.57231	0.499971		0.529802
	6	11.5051	10.3192	7.49427	6.41624	9.11558	10.6591	8.23658	6.43219	3.79175			6	3.90076	4.74095	2.5067	2.19301	1.90149	2.80939	2.78997	1.91529	1.61605
	7	23.0406	17.1224	15.7377	14.0417	12.1202	16.0368	7.32288	11.4955	9.12052			7	6.53727	3.23341	3.50087	4.5892	0.953938	1.66347	0.844342	1.87289	1.61316
	8	21.3447	25.3112	23.7809	17.4905	15.857	18.5118	7.67612	14.1659	13.1434			8	1.26014	2.7959	2.28948	2.35895	1.67639	0.940872	0.662568	0.830709	0.953279
	9	23.7118	24.2911	27.9548	21.8342	18.6907	19.6688	7.03605	17.0126	16.7389			9	0.666055	1.49815	0.88446	4.73924	1.26915	0.706323	0.549312	1.06956	0.68824
	10	25.9041	57.9248	66.739	79.8171	18.6891	20.5168	6.88816	18.2775	22.1111			10	1.09562				0.588027	0.67665	0.590388	0.722204	0.822172
	11	11.8782	9.73302	5.07796	9.31534	8.55979	12.7939	9.62824	7.23593	5.04144			11	4.43167	4.5167	2.40694	3.07821	2.43036	3.34587	3.29252	1.96768	1.57895
	12	18.9006	18.1757	13.0173	14.1141	14.2077	17.6854	8.77915	12.1587	11.0068			12	2.25792	3.36694	2.22379	3.2048	2.0651	1.46086	0.671518	2.02156	1.22885
	13	22.6565	22.1409	18.0199	19.9854	14.8205	19.0232	7.72875	15.9828	15.1602			13	1.60769	1.33474	1.2222	5.62201	0.503258	0.752145	0.254922	0.992702	0.635265
	14	22.0588	26.3435	57.1375	18.5493	17.631	19.7716	6.63086	18.4394	17.9666			14	0.518054	1.50338		1.32391	1.29901	0.563817	0.631178	0.789756	0.927226
	15	24.163	56.2251	62.126	19.883	18.5817	19.6087	6.28914	20.6678	62.7863			15	0.76145			1.96858	0.991808	0.561691	0.478536	0.598067
	16	11.7122	8.87306	5.4751	13.3751	12.1781	11.9718	8.15243	5.55744	3.63208			16	4.20975	4.19771	2.83501	6.65004	3.42691	3.41965	2.76417	1.76531	1.33867
	17	17.769	16.8625	9.08484	15.592	14.907	16.4633	8.54146	11.0854	7.82495			17	2.03763	2.48684	0.71818	1.75997	1.24928	1.20391	1.06388	1.44434	0.852635
	18	17.4566	20.5632	45.8466	18.7771	16.8072	18.6691	8.01037	14.2772	10.3648			18	0.716173	1.29857		4.32858	1.22222	0.947839	0.600533	1.1634	0.63992
	19	19.4473	21.6968	49.0476	18.2194	18.0239	18.7113	6.57429	15.1582	11.4706			19	0.941949	0.89025		1.23153	0.862944	0.582472	0.383854	0.588058	0.413908
	20	20.9629	51.0747	54.97	79.4999	18.0743	19.929	6.46146	16.5648	49.1835			20	0.916318				0.593553	0.607509	0.54661	0.569389
	21	10.6468	8.39016	5.44815	9.81711	9.78683	12.8598	8.02561	6.93878	4.2636			21	3.8613	4.05606	2.11559	3.3703	2.6778	3.29953	2.81345	2.08328	1.38787
	22	16.1575	13.0103	43.115	16.6503	15.3997	17.2773	8.41667	11.133	6.74193			22	1.50646	1.23215		3.87036	1.9051	1.06055	0.919274	0.69442	0.626019
	23	16.0573	15.8411	44.1075	21.3432	15.6858	17.246	7.30116	14.4969	9.06746			23	0.500892	1.05501		2.507	0.724992	0.335634	0.293882	1.00909	0.513072
	24	15.6815	43.986	53.432	25.5897	16.9634	18.1134	5.87198	15.3954	11.1931			24	0.66274			3.56916	0.74006	0.553608	0.550615	0.589303	0.879542
	25	16.0488	41.034	48.862	81.7649	17.6586	18.5326	5.83302	17.2912	46.9655			25	0.442514				0.550588	0.332451	0.763571	0.704647

## Sheet: Figure 2S2
Artifacts are truncated in some figures	Panel A1	same as Figure 2, panel A			Panel A2	Top	V	dV/dt	Inset	V	dV/dt	Fit	V	dV/dt	Top	V	dV/dt	Inset	V	dV/dt	Fit	V	dV/dt	Bottom	V	dV/dt	Inset	V	dV/dt	Fit	V	dV/dt		Panel B1	Voltage threshold	Phase slope		Panel B2	a	Control	TTX	b	Control	TTX	c	Control	TTX	d	Control
						Purple	-59.5964	0.496674		-58.4956	2.76604		-57.4943	2.59716	Red	-34.1791	0.704002		-33.7457	0.638771		-33.4996	0.178013	Purple	-57.3796	-0.319672		-55.488	3.22599		-54.3111	4.09917			-54.0573	1.9981				-67.6375	-67.1		-66.75	-66.8656		-57.6781	-59.95		-62.7625
							-59.5866	0.478649		-58.4401	2.77338		-55.8314	5.73911		-34.1646	0.742912		-33.7323	0.689602		-33.3784	1.50212		-57.3861	-0.321007		-55.4229	3.28903		-52.7765	7.1654			-56.8761	1.8894				-67.6375	-67.1		-66.75	-66.8656		-57.6781	-59.95		-62.7625
							-59.5772	0.452805		-58.3846	2.77243					-34.1494	0.771332		-33.7181	0.73328					-57.3925	-0.315762		-55.3565	3.34883						-37.5553	3.6738				-67.5219	-67.075		-66.9281	-66.975		-57.6812	-59.9781		-62.6594
							-59.5685	0.419617		-58.3292	2.76365					-34.1337	0.789738		-33.703	0.767994					-57.3987	-0.302982		-55.2889	3.40519						-33.4599	10.925				-67.5219	-67.075		-66.9281	-66.975		-57.6812	-59.9781		-62.6594
							-59.5604	0.379562		-58.2741	2.7482					-34.1178	0.798321		-33.6874	0.792408					-57.4046	-0.282955		-55.2203	3.4586						-28.803	9.9076				-67.7125	-66.95		-66.95	-66.7875		-57.6594	-60.1		-62.75
							-59.5533	0.3335		-58.2193	2.72675					-34.1018	0.797844		-33.6713	0.805855					-57.41	-0.256157		-55.1506	3.51						-22.558	12.38				-67.7125	-66.95		-66.95	-66.7875		-57.6594	-60.1		-62.75
							-59.5471	0.281811		-58.165	2.70071					-34.0859	0.788689		-33.6551	0.807476					-57.4148	-0.223637		-55.0799	3.55978						-36.9348	5.1292				-67.6719	-66.8562		-67.05	-66.5594		-57.7156	-60.0469		-62.7875
							-59.542	0.225639		-58.1113	2.67162					-34.0702	0.771236		-33.639	0.797558					-57.419	-0.185966		-55.0082	3.60861						-34.4403	7.3183				-67.6719	-66.8562		-67.05	-66.5594		-57.7156	-60.0469		-62.7875
							-59.5381	0.166035		-58.0582	2.64111					-34.055	0.746918		-33.6232	0.776386					-57.4223	-0.144386		-54.9355	3.65791						-36.5912	9.5232				-67.4375	-66.9219		-67.0656	-66.6		-57.7281	-59.9406		-62.7719
							-59.5354	0.10376		-58.0056	2.61049					-34.0404	0.716686		-33.608	0.744724					-57.4247	-0.101089		-54.8619	3.70884						-34.618	11.127				-67.4375	-66.9219		-67.0656	-66.6		-57.7281	-59.9406		-62.7719
							-59.5339	0.0404358		-57.9537	2.5816					-34.0264	0.681496		-33.5934	0.703621					-57.4263	-0.0564575		-54.7872	3.76263						-38.09	6.6339				-67.4437	-66.9437		-66.85	-66.6062		-57.6719	-59.8844		-62.6844
							-59.5337	-0.0220299		-57.9024	2.55632					-34.0131	0.642681		-33.5798	0.654602					-57.427	-0.0124931		-54.7113	3.8209						-31.4271	11.38				-67.4437	-66.9437		-66.85	-66.6062		-57.6719	-59.8844		-62.6844
							-59.5348	-0.0824928		-57.8515	2.53601					-34.0007	0.601768		-33.5672	0.599289					-57.4268	0.0294685		-54.6343	3.8847						-38.3145	4.5892				-67.5687	-67		-66.7438	-66.6562		-57.6344	-59.8		-62.65
							-59.537	-0.139713		-57.8009	2.52285					-33.989	0.560093		-33.5558	0.539112					-57.4258	0.0684738		-54.556	3.95546						-34.7165	10.002				-67.5687	-67		-66.7438	-66.6562		-57.6344	-59.8		-62.65
							-59.5404	-0.191593		-57.7506	2.51837					-33.9782	0.518799		-33.5457	0.476265					-57.4241	0.102901		-54.4761	4.03509						-33.1207	9.1836				-67.55	-66.875		-66.6375	-66.7687		-57.6688	-59.8187		-62.6875
							-59.5447	-0.237179		-57.7002	2.52342					-33.9683	0.479221		-33.5368	0.412464					-57.4217	0.132465		-54.3946	4.12483						-24.7345	8.4938				-67.55	-66.875		-66.6375	-66.7687		-57.6688	-59.8187		-62.6875
							-59.5499	-0.275326		-57.6496	2.53954					-33.9591	0.442219		-33.5292	0.349426					-57.4188	0.156116		-54.3111	4.22611						-34.9876	11.395				-67.4	-66.8406		-66.675	-66.7469		-57.8	-59.9375		-62.6656
							-59.5557	-0.304985		-57.5986	2.56758					-33.9506	0.408554		-33.5228	0.289154					-57.4155	0.17395		-54.2255	4.34036						-34.5532	10.021				-67.4	-66.8406		-66.675	-66.7469		-57.8	-59.9375		-62.6656
							-59.5621	-0.326252		-57.5469	2.60763					-33.9427	0.379181		-33.5176	0.233459					-57.4118	0.185394		-54.1375	4.46873						-32.5413	10.31				-67.5875	-66.8594		-66.7406	-66.7156		-57.9844	-60.0062		-62.6688
							-59.5688	-0.338554		-57.4943	2.66027					-33.9354	0.354195		-33.5135	0.183487					-57.408	0.190544		-54.0468	4.61264						-34.7465	4.5777				-67.5875	-66.8594		-66.7406	-66.7156		-57.9844	-60.0062		-62.6688
							-59.5756	-0.342274		-57.4405	2.72589					-33.9286	0.333691		-33.5103	0.140762					-57.4042	0.190544		-53.953	4.77238						-32.2993	9.3728				-67.6219	-66.9313		-66.7562	-66.625		-58.0469	-60.0219		-62.6312
							-59.5825	-0.337791		-57.3853	2.80371					-33.9221	0.317383		-33.5078	0.107193					-57.4004	0.185299		-53.8559	4.94862						-32.0674	12.774				-67.6219	-66.9313		-66.7562	-66.625		-58.0469	-60.0219		-62.6312
							-59.5891	-0.32568		-57.3284	2.89354					-33.9159	0.305176		-33.506	0.083828					-57.3968	0.176144		-53.755	5.14221						-36.6305	6.432				-67.525	-66.9094		-66.6937	-66.7344		-57.9969	-59.7812		-62.7406
							-59.5955	-0.307178		-57.2695	2.99463					-33.9099	0.296688		-33.5045	0.0720024					-57.3934	0.164127		-53.6502	5.35259						-33.2076	12.833				-67.525	-66.9094		-66.6937	-66.7344		-57.9969	-59.7812		-62.7406
							-59.6014	-0.283527		-57.2086	3.10583					-33.904	0.290871		-33.5031	0.0729561					-57.3902	0.149822		-53.5409	5.57976						-29.2627	7.8207				-67.4625	-66.8531		-66.7969	-66.6687		-57.8719	-59.8125		-62.65
							-59.6068	-0.25568		-57.1453	3.22657					-33.8982	0.287247		-33.5016	0.0874519					-57.3874	0.134754		-53.427	5.82275						-34.5114	11.828				-67.4625	-66.8531		-66.7969	-66.6687		-57.8719	-59.8125		-62.65
							-59.6116	-0.2244		-57.0795	3.35579					-33.8925	0.284863		-33.4996	0.117111					-57.3848	0.120068		-53.308	6.08091						-36.0794	7.301				-67.5344	-66.7281		-66.9094	-66.7125		-57.6344	-60.0969		-62.55
							-59.6158	-0.191593		-57.0111	3.49207					-33.8868	0.282574		-33.4969	0.162983					-57.3826	0.106812		-53.1838	6.35347						-31.9068	10.358				-67.5344	-66.7281		-66.9094	-66.7125		-57.6344	-60.0969		-62.55
							-59.6193	-0.157928		-56.9398	3.63483					-33.8812	0.279903		-33.4931	0.225735					-57.3806	0.0956535		-53.0539	6.63843						-28.3098	11.97				-67.5625	-66.7562		-66.7562	-66.6937		-57.9	-60.1688		-62.5344
							-59.6221	-0.123882		-56.8657	3.78313					-33.8756	0.276375		-33.4879	0.306606					-57.3787	0.0874519									-32.3997	15.031				-67.5625	-66.7562		-66.7562	-66.6937		-57.9	-60.1688		-62.5344
							-59.6243	-0.0906944		-56.7885	3.93629					-33.8702	0.27113		-33.4808	0.406075					-57.3771	0.0832558									-52.1487	4.8931				-67.6062	-66.6937		-66.7687	-66.7594		-57.9562	-59.8281		-62.5719
							-59.6257	-0.0581741		-56.7082	4.09412					-33.8648	0.263405		-33.4716	0.525188					-57.3754	0.0832558									-47.3688	13.369				-67.6062	-66.6937		-66.7687	-66.7594		-57.9562	-59.8281		-62.5719
							-59.6266	-0.0267982		-56.6247	4.25577					-33.8596	0.253296		-33.4598	0.664902					-57.3737	0.0878334									-39.6588	22.039				-67.5031	-66.5875		-66.9281	-66.7687		-57.8937	-59.9219		-62.5938
							-59.6268	0.00305176		-56.538	4.42142					-33.8547	0.240898		-33.445	0.82531					-57.3719	0.0973701									-36.5858	1.1181				-67.5031	-66.5875		-66.9281	-66.7687		-57.8937	-59.9219		-62.5938
							-59.6265	0.0315666		-56.4479	4.59156					-33.85	0.226307		-33.4268	1.00698					-57.3698	0.111866									-38.3219	9.8195				-67.5406	-66.6781		-66.8	-66.8875		-57.8187	-59.8781		-62.6219
							-59.6256	0.0588417		-56.3543	4.76589					-33.8456	0.21019		-33.4047	1.21002					-57.3674	0.131226									-24.5904	1.6465				-67.5406	-66.6781		-66.8	-66.8875		-57.8187	-59.8781		-62.6219
							-59.6241	0.0852585		-56.2573	4.9449					-33.8416	0.192833		-33.3784	1.43442					-57.3646	0.15564									-18.8354	1.2133				-67.4938	-66.9		-66.7375	-66.85		-57.8844	-60.0312		-62.7
							-59.6221	0.111198		-56.1565	5.12953					-33.8379	0.175476		-33.3474	1.68056					-57.3612	0.184822									-28.0371	6.9121				-67.4938	-66.9		-66.7375	-66.85		-57.8844	-60.0312		-62.7
							-59.6197	0.136471		-56.0521	5.32026					-33.8346	0.159359		-33.3112	1.94826					-57.3572	0.218678									-28.4345	5.383				-67.6656	-67.0938		-66.6156	-66.75		-57.8844	-59.8937		-62.625
							-59.6167	0.161552								-33.8315	0.145531		-33.2694	2.23713					-57.3525	0.257301														-67.6656	-67.0938		-66.6156	-66.75		-57.8844	-59.8937		-62.625
							-59.6132	0.186729								-33.8287	0.135231		-33.2217	2.54669					-57.3469	0.299931														-67.4375	-66.8906		-66.7312	-66.6062		-57.95	-59.85		-62.7
							-59.6092	0.21143								-33.8261	0.129414		-33.1676	2.87676					-57.3405	0.346947														-67.4375	-66.8906		-66.7312	-66.6062		-57.95	-59.85		-62.7
							-59.6047	0.23613								-33.8236	0.129795		-33.1066	3.22676					-57.333	0.397968														-67.4844	-66.8469		-66.8594	-66.5812		-57.8	-59.7875		-62.675
							-59.5998	0.260639								-33.8209	0.137234		-33.0385	3.59621					-57.3245	0.452137														-67.4844	-66.8469		-66.8594	-66.5812		-57.8	-59.7875		-62.675
							-59.5943	0.284386								-33.8181	0.152206		-32.9628	3.98474					-57.3149	0.509453														-67.4469	-67.0281		-66.8312	-66.7937		-57.7812	-59.9219		-62.6406
							-59.5884	0.307655								-33.8148	0.175285								-57.3042	0.56982														-67.4469	-67.0281		-66.8312	-66.7937		-57.7812	-59.9219		-62.6406
							-59.582	0.330067								-33.8111	0.206661								-57.2921	0.632381														-67.4375	-67.0563		-66.7156	-66.8187		-57.9969	-59.8969		-62.7
							-59.5752	0.350475								-33.8066	0.245857								-57.2789	0.696468														-67.4375	-67.0563		-66.7156	-66.8187		-57.9969	-59.8969		-62.7
							-59.568	0.368881								-33.8012	0.292301								-57.2643	0.7617														-67.4	-66.9719		-66.7	-66.7344		-57.8812	-59.9594		-62.6156
							-59.5604	0.385189								-33.7949	0.344849								-57.2484	0.827217														-67.4	-66.9719		-66.7	-66.7344		-57.8812	-59.9594		-62.6156
							-59.5526	0.398254								-33.7874	0.401974								-57.2312	0.892353														-67.2656	-66.8906		-66.7188	-66.8375		-57.8406	-59.8719		-62.7094
							-59.5445	0.407887								-33.7788	0.46196								-57.2127	0.956249														-67.2656	-66.8906		-66.7188	-66.8375		-57.8406	-59.8719		-62.7094
							-59.5363	0.414371								-33.769	0.522709								-57.193	1.01824														-67.2937	-66.925		-66.75	-66.6875		-57.825	-59.9688		-62.7656
							-59.5279	0.416756								-33.7579	0.582409								-57.172	1.07794														-67.2937	-66.925		-66.75	-66.6875		-57.825	-59.9688		-62.7656
							-59.5196	0.415421								-33.7457	0.638771								-57.1498	1.13459														-67.3156	-66.9		-66.675	-66.7406		-57.8563	-60.1812		-62.7969
							-59.5113	0.409985								-33.7323	0.689602								-57.1266	1.18761														-67.3156	-66.9		-66.675	-66.7406		-57.8563	-60.1812		-62.7969
							-59.5032	0.400639								-33.7181	0.73328								-57.1023	1.23682														-67.4656	-66.9219		-66.7	-66.6937		-57.9156	-60.0156		-62.6281
							-59.4953	0.388527								-33.703	0.767994								-57.0771	1.28222														-67.4656	-66.9219		-66.7	-66.6937		-57.9156	-60.0156		-62.6281
							-59.4877	0.373459								-33.6874	0.792408								-57.051	1.32399														-67.3875	-66.9406		-66.6719	-66.7719		-57.8812	-60.0375		-62.65
							-59.4804	0.356579								-33.6713	0.805855								-57.0242	1.36166														-67.3875	-66.9406		-66.6719	-66.7719		-57.8812	-60.0375		-62.65
							-59.4734	0.339222								-33.6551	0.807476								-56.9966	1.39561														-67.4062	-66.8812		-66.95	-66.675		-57.9219	-60.0094		-62.75
							-59.4668	0.322342								-33.639	0.797558								-56.9683	1.42679														-67.4062	-66.8812		-66.95	-66.675		-57.9219	-60.0094		-62.75
							-59.4605	0.307083								-33.6232	0.776386								-56.9395	1.4554														-67.575	-66.875		-66.9313	-66.6		-57.9312	-59.975		-62.6719
							-59.4545	0.295162								-33.608	0.744724								-56.9101	1.48163														-67.575	-66.875		-66.9313	-66.6		-57.9312	-59.975		-62.6719
							-59.4487	0.288582								-33.5934	0.703621								-56.8802	1.50614														-67.5187	-66.95		-66.6125	-66.6531		-58.0438	-59.9156		-62.7406
							-59.443	0.288677								-33.5798	0.654602								-56.8499	1.5295														-67.5187	-66.95		-66.6125	-66.6531		-58.0438	-59.9156		-62.7406
							-59.4371	0.296497								-33.5672	0.599289								-56.8191	1.55239														-67.3969	-66.9719		-66.6	-66.6656		-58.0656	-59.8406		-62.8156
							-59.4311	0.313663								-33.5558	0.539112								-56.7878	1.57509														-67.3969	-66.9719		-66.6	-66.6656		-58.0656	-59.8406		-62.8156
							-59.4246	0.341797								-33.5457	0.476265								-56.7561	1.59826														-67.6156	-66.8187		-66.7	-66.7		-58.0562	-59.8719		-62.8125
							-59.4174	0.381279								-33.5368	0.412464								-56.7239	1.62249														-67.6156	-66.8187		-66.7	-66.7		-58.0562	-59.8719		-62.8125
							-59.4094	0.432491								-33.5292	0.349426								-56.6912	1.64766														-67.6031	-66.6344		-66.6875	-66.7625		-58.05	-60.0844		-62.7875
							-59.4001	0.496101								-33.5228	0.289154								-56.6579	1.67456														-67.6031	-66.6344		-66.6875	-66.7625		-58.05	-60.0844		-62.7875
							-59.3895	0.571918								-33.5176	0.233459								-56.6242	1.70355														-67.4469	-66.7031		-66.8875	-66.775		-57.9	-60.0875		-62.7219
							-59.3773	0.658989								-33.5135	0.183487								-56.5898	1.73445														-67.4469	-66.7031		-66.8875	-66.775		-57.9	-60.0875		-62.7219
							-59.3631	0.756836								-33.5103	0.140762								-56.5548	1.76821														-67.4594	-66.9219		-66.7156	-66.7188		-58.0469	-60.0094		-62.6469
							-59.347	0.86422								-33.5078	0.107193								-56.5191	1.80502														-67.4594	-66.9219		-66.7156	-66.7188		-58.0469	-60.0094		-62.6469
							-59.3286	0.979424								-33.506	0.083828								-56.4826	1.84507														-67.5062	-67.0719		-66.7	-66.6344		-58.1	-59.7906		-62.6375
							-59.3078	1.10111								-33.5045	0.0720024								-56.4453	1.88866														-67.5062	-67.0719		-66.7	-66.6344		-58.1	-59.7906		-62.6375
							-59.2845	1.22747								-33.5031	0.0729561								-56.407	1.93596														-67.6062	-67.0938		-66.825	-66.6719		-58.0687	-59.975		-62.6344
							-59.2587	1.35641								-33.5016	0.0874519								-56.3678	1.98746														-67.6062	-67.0938		-66.825	-66.6719		-58.0687	-59.975		-62.6344
							-59.2303	1.48602								-33.4996	0.117111								-56.3275	2.04296														-67.6469	-67		-66.875	-66.75		-58.075	-59.9906		-62.7437
							-59.1993	1.61505								-33.4969	0.162983								-56.2861	2.10257														-67.6469	-67		-66.875	-66.75		-58.075	-59.9906		-62.7437
							-59.1657	1.7416								-33.4931	0.225735								-56.2434	2.16637														-67.3656	-67.0687		-66.9719	-66.7812		-57.975	-59.9375		-62.5812
							-59.1296	1.86424								-33.4879	0.306606								-56.1995	2.23408														-67.3656	-67.0687		-66.9719	-66.7812		-57.975	-59.9375		-62.5812
							-59.0911	1.98193								-33.4808	0.406075								-56.1541	2.30551														-67.4719	-67.1188		-67.0594	-66.6		-57.875	-59.9312		-62.6
							-59.0503	2.09322								-33.4716	0.525188								-56.1072	2.38028														-67.4719	-67.1188		-67.0594	-66.6		-57.875	-59.9312		-62.6
							-59.0074	2.19774								-33.4598	0.664902								-56.0589	2.45752														-67.4719	-67.0875		-66.8562	-66.6719		-57.975	-60.3156		-62.7313
							-58.9624	2.29454								-33.445	0.82531								-56.0089	2.53687														-67.4719	-67.0875		-66.8562	-66.6719		-57.975	-60.3156		-62.7313
							-58.9156	2.38295								-33.4268	1.00698								-55.9574	2.61774														-67.6281	-67.1		-66.7531	-66.65		-58.0187	-60.3875		-62.6406
							-58.8671	2.46277								-33.4047	1.21002								-55.9042	2.69899														-67.6281	-67.1		-66.7531	-66.65		-58.0187	-60.3875		-62.6406
							-58.8171	2.53363								-33.3784	1.43442								-55.8494	2.78025														-67.5687	-66.9875		-66.75	-66.6719		-57.9312	-60.0562		-62.5594
							-58.7657	2.59552								-33.3474	1.68056								-55.793	2.86055														-67.5687	-66.9875		-66.75	-66.6719		-57.9312	-60.0562		-62.5594
							-58.7133	2.64845								-33.3112	1.94826								-55.735	2.93903														-67.3688	-66.9125		-66.7875	-66.7125		-57.875	-60.0969		-62.5
							-58.6598	2.69184								-33.2694	2.23713								-55.6755	3.01542														-67.3688	-66.9125		-66.7875	-66.7125		-57.875	-60.0969		-62.5
							-58.6056	2.7257								-33.2217	2.54669								-55.6144	3.08895														-67.3312	-66.875		-66.6312	-66.8125		-57.9375	-60.1375		-62.575
							-58.5508	2.75049								-33.1676	2.87676								-55.5519	3.15933														-67.3312	-66.875		-66.6312	-66.8125		-57.9375	-60.1375		-62.575
							-58.4956	2.76604								-33.1066	3.22676								-55.488	3.22599														-67.3469	-66.8375		-66.6437	-66.7469		-57.9125	-60.1844		-62.5094
							-58.4401	2.77338								-33.0385	3.59621								-55.4229	3.28903														-67.3469	-66.8375		-66.6437	-66.7469		-57.9125	-60.1844		-62.5094
							-58.3846	2.77243								-32.9628	3.98474								-55.3565	3.34883														-67.3625	-66.7156		-66.775	-66.6062		-57.9375	-60.0938		-62.525
							-58.3292	2.76365								-32.8791	4.39148								-55.2889	3.40519														-67.3625	-66.7156		-66.775	-66.6062		-57.9375	-60.0938		-62.525
							-58.2741	2.7482								-32.7871	4.81596								-55.2203	3.4586														-67.5	-66.6687		-66.65	-66.6062		-57.9688	-60.0719		-62.65
							-58.2193	2.72675								-32.6865	5.2577								-55.1506	3.51														-67.5	-66.6687		-66.65	-66.6062		-57.9688	-60.0719		-62.65
							-58.165	2.70071								-32.5768	5.71585								-55.0799	3.55978														-67.4156	-66.7812		-66.6937	-66.75		-57.9656	-60.0312		-62.6312
							-58.1113	2.67162								-32.4578	6.19001								-55.0082	3.60861														-67.4156	-66.7812		-66.6937	-66.75		-57.9656	-60.0312		-62.6312
							-58.0582	2.64111								-32.3292	6.68001								-54.9355	3.65791														-67.3781	-66.8531		-66.6656	-66.8844		-57.9969	-60.0781		-62.4219
							-58.0056	2.61049								-32.1906	7.18422								-54.8619	3.70884														-67.3781	-66.8531		-66.6656	-66.8844		-57.9969	-60.0781		-62.4219
							-57.9537	2.5816								-32.0418	7.70221								-54.7872	3.76263														-67.4313	-67.0312		-66.6125	-66.7156		-57.9625	-60.0781		-62.5156
							-57.9024	2.55632								-31.8825	8.2335								-54.7113	3.8209														-67.4313	-67.0312		-66.6125	-66.7156		-57.9625	-60.0781		-62.5156
							-57.8515	2.53601								-31.7125	8.77676								-54.6343	3.8847														-67.4594	-66.9062		-66.7188	-66.5656		-58.0469	-60.0312		-62.5094
							-57.8009	2.52285								-31.5315	9.33132								-54.556	3.95546														-67.4594	-66.9062		-66.7188	-66.5656		-58.0469	-60.0312		-62.5094
							-57.7506	2.51837								-31.3393	9.89599								-54.4761	4.03509														-67.5594	-66.7		-66.8	-66.6375		-58.15	-60.1437		-62.5687
							-57.7002	2.52342								-31.1356	10.4695								-54.3946	4.12483														-67.5594	-66.7		-66.8	-66.6375		-58.15	-60.1437		-62.5687
							-57.6496	2.53954								-30.9205	11.0506								-54.3111	4.22611														-67.5875	-66.9125		-66.8094	-66.65		-58.0875	-60.2656		-62.575
							-57.5986	2.56758								-30.6936	11.6381								-54.2255	4.34036														-67.5875	-66.9125		-66.8094	-66.65		-58.0875	-60.2656		-62.575
							-57.5469	2.60763								-30.4549	12.2307								-54.1375	4.46873														-67.4812	-67.05		-66.675	-66.7562		-57.9813	-60.0656		-62.5344
							-57.4943	2.66027								-30.2044	12.8269								-54.0468	4.61264														-67.4812	-67.05		-66.675	-66.7562		-57.9813	-60.0656		-62.5344
							-57.4405	2.72589								-29.9419	13.425								-53.953	4.77238														-67.4156	-67.1375		-66.7875	-66.8312		-58.0187	-60.0969		-62.6469
							-57.3853	2.80371								-29.6674	14.0237								-53.8559	4.94862														-67.4156	-67.1375		-66.7875	-66.8312		-58.0187	-60.0969		-62.6469
							-57.3284	2.89354								-29.3809	14.6209								-53.755	5.14221														-67.525	-66.9375		-66.75	-66.6344		-58	-60.2062		-62.6094
							-57.2695	2.99463								-29.0825	15.2152								-53.6502	5.35259														-67.525	-66.9375		-66.75	-66.6344		-58	-60.2062		-62.6094
							-57.2086	3.10583								-28.7723	15.8043								-53.5409	5.57976														-67.5594	-66.9781		-66.6125	-66.4906		-57.9406	-60.1125		-62.6312
							-57.1453	3.22657								-28.4504	16.3864								-53.427	5.82275														-67.5594	-66.9781		-66.6125	-66.4906		-57.9406	-60.1125		-62.6312
							-57.0795	3.35579								-28.1169	16.9592								-53.308	6.08091														-67.4281	-66.9		-66.6937	-66.6656		-57.8687	-60.1656		-62.4656
							-57.0111	3.49207								-27.772	17.5205								-53.1838	6.35347														-67.4281	-66.9		-66.6937	-66.6656		-57.8687	-60.1656		-62.4656
							-56.9398	3.63483								-27.416	18.0677								-53.0539	6.63843														-67.3781	-66.7562		-66.7219	-66.8844		-57.9219	-60.1125		-62.5
							-56.8657	3.78313								-27.0493	18.5983								-52.9182	6.93464														-67.3781	-66.7562		-66.7219	-66.8844		-57.9219	-60.1125		-62.5
							-56.7885	3.93629								-26.6721	19.1097								-52.7765	7.2402														-67.4406	-66.8875		-66.6875	-66.8312		-57.9781	-60.2188		-62.5594
							-56.7082	4.09412								-26.2849	19.5994								-52.6286	7.55386														-67.4406	-66.8875		-66.6875	-66.8312		-57.9781	-60.2188		-62.5594
							-56.6247	4.25577								-25.8881	20.0646								-52.4744	7.8742														-67.4562	-66.8406		-66.8187	-66.775		-57.95	-60.15		-62.5812
							-56.538	4.42142								-25.4823	20.5028								-52.3136	8.19921														-67.4562	-66.8406		-66.8187	-66.775		-57.95	-60.15		-62.5812
							-56.4479	4.59156								-25.068	20.9115								-52.1464	8.52766														-67.6312	-66.8781		-66.6	-66.6625		-58.0312	-60.1469		-62.4156
							-56.3543	4.76589								-24.6459	21.2884								-51.9725	8.85878														-67.6312	-66.8781		-66.6	-66.6625		-58.0312	-60.1469		-62.4156
							-56.2573	4.9449								-24.2165	21.6314								-51.792	9.1917														-67.5563	-66.9938		-66.7594	-66.6281		-57.9375	-60.2562		-62.475
							-56.1565	5.12953								-23.7806	21.9387								-51.6049	9.52587														-67.5563	-66.9938		-66.7594	-66.6281		-57.9375	-60.2562		-62.475
							-56.0521	5.32026								-23.3389	22.2084								-51.411	9.8609														-67.4594	-67.0125		-66.5469	-66.6687		-58.0094	-60.3062		-62.4844
							-55.9437	5.51758								-22.8923	22.439								-51.2104	10.1967														-67.4594	-67.0125		-66.5469	-66.6687		-58.0094	-60.3062		-62.4844
							-55.8314	5.72214								-22.4414	22.6294								-51.0031	10.5338														-67.5062	-67.0406		-66.7812	-66.7438		-57.9656	-60.1469		-62.55
							-55.7148	5.93481								-21.9871	22.7786								-50.7891	10.8725														-67.5062	-67.0406		-66.7812	-66.7438		-57.9656	-60.1469		-62.55
							-55.594	6.15568								-21.5302	22.8857								-50.5682	11.213														-67.4406	-66.9		-66.75	-66.7156		-57.9375	-60.2594		-62.5094
							-55.4686	6.38475								-21.0717	22.95								-50.3406	11.5564														-67.4406	-66.9		-66.75	-66.7156		-57.9375	-60.2594		-62.5094
							-55.3386	6.62203								-20.6122	22.9708								-50.106	11.9037														-67.375	-67.1031		-66.7469	-66.675		-58.0719	-60.3062		-62.3875
							-55.2037	6.8676								-20.1528	22.9479								-49.8644	12.2555														-67.375	-67.1031		-66.7469	-66.675		-58.0719	-60.3062		-62.3875
							-55.0639	7.12118								-19.6943	22.8811								-49.6158	12.6127														-67.6094	-67.075		-66.7625	-66.7094		-57.9344	-60.2344		-62.4156
							-54.9189	7.38192								-19.2376	22.7701								-49.3599	12.9763														-67.6094	-67.075		-66.7625	-66.7094		-57.9344	-60.2344		-62.4156
							-54.7686	7.64894								-18.7835	22.6149								-49.0967	13.3471														-67.725	-66.9219		-66.7281	-66.6031		-58.0719	-60.2188		-62.6281
							-54.6129	7.9217								-18.333	22.4157								-48.826	13.7256														-67.725	-66.9219		-66.7281	-66.6031		-58.0719	-60.2188		-62.6281
							-54.4517	8.19941								-17.8869	22.1731								-48.5477	14.1129														-67.6094	-66.8219		-66.6406	-66.625		-58.0687	-60.1156		-62.6656
							-54.285	8.48093								-17.4461	21.8874								-48.2615	14.5098														-67.6094	-66.8219		-66.6406	-66.625		-58.0687	-60.1156		-62.6656
							-54.1125	8.76541								-17.0114	21.56								-47.9673	14.9166														-67.4719	-66.925		-66.8125	-66.6781		-58.0875	-60.1531		-62.6125
							-53.9343	9.05237								-16.5837	21.1919								-47.6648	15.3342														-67.4719	-66.925		-66.8125	-66.6781		-58.0875	-60.1531		-62.6125
							-53.7504	9.34124								-16.1637	20.7848								-47.3539	15.7635														-67.4	-66.9187		-66.8688	-66.5812		-58.1406	-60.3812		-62.6437
							-53.5607	9.63135								-15.7523	20.3409								-47.0343	16.2049														-67.4	-66.9187		-66.8688	-66.5812		-58.1406	-60.3812		-62.6437
							-53.3652	9.9227								-15.3501	19.8625								-46.7057	16.6595														-67.375	-66.8531		-66.8812	-66.6813		-58.075	-60.3375		-62.6
							-53.1638	10.2149								-14.9578	19.3527								-46.3679	17.1281														-67.375	-66.8531		-66.8812	-66.6813		-58.075	-60.3375		-62.6
							-52.9566	10.5082								-14.576	18.8144								-46.0206	17.6112														-67.4594	-67.0156		-66.6625	-66.9219		-57.9937	-60.2031		-62.5687
							-52.7435	10.8029								-14.2052	18.2514								-45.6635	18.1099														-67.4594	-67.0156		-66.6625	-66.9219		-57.9937	-60.2031		-62.5687
							-52.5244	11.0993								-13.8459	17.6675								-45.2962	18.6247														-67.4281	-67.0969		-66.6719	-66.9406		-57.8719	-60.0531		-62.5375
							-52.2995	11.3976								-13.4985	17.0665								-44.9185	19.1563														-67.4281	-67.0969		-66.6719	-66.9406		-57.8719	-60.0531		-62.5375
							-52.0685	11.6982								-13.1633	16.4526								-44.53	19.7049														-67.4	-67.075		-66.7625	-66.7375		-57.9531	-59.9875		-62.4719
							-51.8316	12.0019								-12.8404	15.83								-44.1303	20.2707														-67.4	-67.075		-66.7625	-66.7375		-57.9531	-59.9875		-62.4719
							-51.5885	12.3083								-12.5301	15.2026								-43.7191	20.8538														-67.5406	-67.2219		-66.7219	-66.7375		-58.05	-60.1		-62.6156
							-51.3392	12.6178								-12.2323	14.5743								-43.2961	21.4533														-67.5406	-67.2219		-66.7219	-66.7375		-58.05	-60.1		-62.6156
							-51.0837	12.9304								-11.9471	13.9488								-42.861	22.0681														-67.5938	-67.0781		-66.6031	-66.6813		-58.1562	-60.175		-62.5812
							-50.822	13.2457								-11.6743	13.3294								-42.4134	22.6967														-67.5938	-67.0781		-66.6031	-66.6813		-58.1562	-60.175		-62.5812
							-50.5539	13.5636								-11.4139	12.7191								-41.9531	23.3364														-67.6188	-66.925		-66.7062	-66.7469		-58.225	-60.3375		-62.4937
							-50.2795	13.8834								-11.1656	12.1204								-41.48	23.9847														-67.6188	-66.925		-66.7062	-66.7469		-58.225	-60.3375		-62.4937
							-49.9986	14.2041								-10.9291	11.5354								-40.9937	24.6379														-67.575	-66.9156		-66.8719	-66.9281		-58.1344	-60.3969		-62.55
							-49.7113	14.525								-10.7042	10.9658								-40.4944	25.2915														-67.575	-66.9156		-66.8719	-66.9281		-58.1344	-60.3969		-62.55
							-49.4176	14.8452								-10.4905	10.4127								-39.9821	25.9412														-67.375	-67.0719		-66.85	-66.9		-58.0312	-60.4125		-62.5187
							-49.1175	15.1633								-10.2877	9.87685								-39.4568	26.5813														-67.375	-67.0719		-66.85	-66.9		-58.0312	-60.4125		-62.5187
							-48.8111	15.4782								-10.0954	9.3586								-38.9188	27.206														-67.4219	-67.0531		-66.75	-66.9625		-58.1625	-60.4156		-62.6344
							-48.4984	15.7889								-9.91331	8.85799								-38.3685	27.809														-67.4219	-67.0531		-66.75	-66.9625		-58.1625	-60.4156		-62.6344
							-48.1795	16.094								-9.74107	8.37457								-37.8065	28.384														-67.4437	-66.95		-66.7812	-66.9344		-58.1531	-60.4406		-62.5719
							-47.8546	16.3926								-9.57833	7.90775								-37.2332	28.9244														-67.4437	-66.95		-66.7812	-66.9344		-58.1531	-60.4406		-62.5719
							-47.5238	16.6841								-9.42476	7.45683								-36.6495	29.4235														-67.4844	-66.8656		-66.7344	-66.75		-58.1094	-60.2281		-62.6344
							-47.1872	16.9671								-9.28006	7.02088								-36.0562	29.8749														-67.4844	-66.8656		-66.7344	-66.75		-58.1094	-60.2281		-62.6344
							-46.8451	17.2414								-9.14393	6.59883								-35.4545	30.2719														-67.5187	-66.925		-66.7375	-66.65		-58.0281	-60.2375		-62.7594
							-46.4976	17.5066								-9.0161	6.18968								-34.8454	30.6094														-67.5187	-66.925		-66.7375	-66.65		-58.0281	-60.2375		-62.7594
							-46.1448	17.7625								-8.89634	5.7924								-34.2301	30.8819														-67.5125	-66.975		-66.775	-66.75		-58.15	-60.35		-62.55
							-45.7871	18.0094								-8.78441	5.40605								-33.6101	31.0843														-67.5125	-66.975		-66.775	-66.75		-58.15	-60.35		-62.55
							-45.4245	18.2477								-8.6801	5.02975								-32.9867	31.2125														-67.5687	-66.925		-66.85	-66.7281		-58.1594	-60.4312		-62.6031
							-45.0572	18.4782								-8.58322	4.6627								-32.3616	31.2633														-67.5687	-66.925		-66.85	-66.7281		-58.1594	-60.4312		-62.6031
							-44.6853	18.7022								-8.49359	4.30408								-31.7362	31.234														-67.5	-66.9313		-66.7656	-66.7281		-58.1656	-60.3156		-62.6344
							-44.3091	18.9209								-8.41105	3.95334								-31.1122	31.1228														-67.5	-66.9313		-66.7656	-66.7281		-58.1656	-60.3156		-62.6344
							-43.9285	19.1363								-8.33545	3.61001								-30.4913	30.9287														-67.4938	-66.9281		-66.6844	-66.6594		-58.1219	-60.2313		-62.6312
							-43.5436	19.3502								-8.26665	3.27356								-29.8751	30.6512														-67.4938	-66.9281		-66.6844	-66.6594		-58.1219	-60.2313		-62.6312
							-43.1545	19.5648								-8.20451	2.94368								-29.2653	30.2909														-67.5312	-66.9187		-66.6062	-66.8094		-58.1344	-60.5656		-62.55
							-42.761	19.7826								-8.14891	2.62012								-28.6635	29.8487														-67.5312	-66.9187		-66.6062	-66.8094		-58.1344	-60.5656		-62.55
							-42.3632	20.0058								-8.09971	2.30262								-28.0713	29.3266														-67.4656	-66.8594		-66.6844	-66.6844		-58.2	-60.5594		-62.7
							-41.9608	20.2369								-8.0568	1.99103								-27.4904	28.7269														-67.4656	-66.8594		-66.6844	-66.6844		-58.2	-60.5594		-62.7
							-41.5537	20.4782								-8.02007	1.68527								-26.9222	28.0524														-67.4844	-66.8656		-66.8	-66.7188		-58.2156	-60.4344		-62.7437
							-41.1417	20.7321								-7.98939	1.38527								-26.3683	27.3064														-67.4844	-66.8656		-66.8	-66.7188		-58.2156	-60.4344		-62.7437
							-40.7244	21.0001								-7.96466	1.09098								-25.83	26.4926														-67.4	-66.775		-66.6844	-66.7469		-58.25	-60.3937		-62.625
							-40.3017	21.284								-7.94575	0.802398								-25.3086	25.6153														-67.4	-66.775		-66.6844	-66.7469		-58.25	-60.3937		-62.625
							-39.8731	21.5848								-7.93256	0.519598								-24.8054	24.6785														-67.6188	-66.9812		-66.8312	-66.8531		-58.175	-60.5344		-62.5187
							-39.4383	21.903								-7.92497	0.242651								-24.3214	23.6868														-67.6188	-66.9812		-66.8312	-66.8531		-58.175	-60.5344		-62.5187
							-38.9969	22.2386								-7.92285	-0.028348								-23.8579	22.6451														-67.6188	-67.0906		-66.8094	-66.775		-58.05	-60.6063		-62.5875
							-38.5487	22.5908								-7.9261	-0.29341								-23.4156	21.558														-67.6188	-67.0906		-66.8094	-66.775		-58.05	-60.6063		-62.5875
							-38.0933	22.9582								-7.93459	-0.552368								-22.9956	20.4302														-67.5031	-67.0656		-66.7438	-66.7875		-58.1406	-60.4344		-62.5312
							-37.6304	23.3387								-7.9482	-0.80514								-22.5984	19.2667														-67.5031	-67.0656		-66.7438	-66.7875		-58.1406	-60.4344		-62.5312
							-37.1598	23.7296								-7.9668	-1.05174								-22.2249	18.0725														-67.3312	-67.0156		-66.7469	-66.7625		-58.175	-60.2281		-62.5719
							-36.6812	24.127								-7.99026	-1.2921								-21.8755	16.852														-67.3312	-67.0156		-66.7469	-66.7625		-58.175	-60.2281		-62.5719
							-36.1947	24.5268								-8.01848	-1.52621								-21.5508	15.6103														-67.4313	-66.9281		-66.575	-66.9594		-58.275	-60.2719		-62.7687
							-35.7001	24.9235								-8.05131	-1.75409								-21.2511	14.3519														-67.4313	-66.9281		-66.575	-66.9594		-58.275	-60.2719		-62.7687
							-35.1977	25.3113								-8.08864	-1.97575								-20.9767	13.0814														-67.65	-66.9688		-66.7438	-66.95		-58.2844	-60.45		-62.7188
							-34.6877	25.6839								-8.13034	-2.19126								-20.7279	11.8029														-67.65	-66.9688		-66.7438	-66.95		-58.2844	-60.45		-62.7188
							-34.1704	26.034								-8.17629	-2.40073								-20.5046	10.5206														-67.6437	-66.9781		-66.6969	-66.825		-58.1656	-60.6281		-62.8219
							-33.6463	26.3536								-8.22637	-2.60427								-20.307	9.23824														-67.6437	-66.9781		-66.6969	-66.825		-58.1656	-60.6281		-62.8219
							-33.1162	26.6346								-8.28046	-2.80199								-20.1351	7.95975														-67.625	-66.8344		-66.7594	-66.9125		-58.1969	-60.7375		-62.6688
							-32.581	26.8682								-8.33845	-2.99392								-19.9887	6.68859														-67.625	-66.8344		-66.7594	-66.9125		-58.1969	-60.7375		-62.6688
							-32.0415	27.0458								-8.40022	-3.18029								-19.8676	5.42769														-67.5187	-66.8		-66.8	-66.925		-58.1656	-60.6063		-62.6781
							-31.4991	27.1583								-8.46566	-3.36123								-19.7715	4.17986														-67.5187	-66.8		-66.8	-66.925		-58.1656	-60.6063		-62.6781
							-30.9552	27.1968								-8.53467	-3.53682								-19.7004	2.9479														-67.4094	-66.7937		-66.7125	-66.9125		-58.0875	-60.4625		-62.5906
							-30.4112	27.1528								-8.60714	-3.70739								-19.6536	1.73378														-67.4094	-66.7937		-66.7125	-66.9125		-58.0875	-60.4625		-62.5906
							-29.8691	27.0183								-8.68297	-3.87301								-19.631	0.539446														-67.2875	-66.875		-66.7219	-66.7906		-58.0094	-60.3969		-62.7
							-29.3305	26.7859								-8.76206	-4.03388								-19.6321	-0.633287														-67.2875	-66.875		-66.7219	-66.7906		-58.0094	-60.3969		-62.7
							-28.7976	26.4489								-8.84432	-4.1903								-19.6563	-1.78323														-67.3312	-66.9969		-66.7687	-66.8344		-58.1125	-60.5156		-62.5187
							-28.2726	26.0022								-8.92967	-4.34251								-19.7034	-2.90918														-67.3312	-66.9969		-66.7687	-66.8344		-58.1125	-60.5156		-62.5187
							-27.7575	25.4416								-9.01802	-4.49066								-19.7727	-4.0103														-67.4469	-67.0906		-66.7188	-66.8219		-58.1625	-60.55		-62.6125
							-27.2549	24.7642								-9.1093	-4.63498								-19.8638	-5.0859														-67.4469	-67.0906		-66.7188	-66.8219		-58.1625	-60.55		-62.6125
							-26.767	23.9688								-9.20342	-4.77569								-19.9761	-6.13513														-67.6219	-67.2		-66.7094	-66.7937		-58.2562	-60.4875		-62.65
							-26.2961	23.0556								-9.30032	-4.91314								-20.1092	-7.15771														-67.6219	-67.2		-66.7094	-66.7937		-58.2562	-60.4875		-62.65
							-25.8448	22.026								-9.39995	-5.04737								-20.2624	-8.1532														-67.5094	-67.15		-66.7062	-66.5563		-58.3187	-60.3187		-62.6562
							-25.4151	20.8836								-9.50222	-5.17845								-20.4353	-9.12108														-67.5094	-67.15		-66.7062	-66.5563		-58.3187	-60.3187		-62.6562
							-25.0094	19.6328								-9.60708	-5.30655								-20.6273	-10.061														-67.5437	-67.1625		-66.8312	-66.5219		-58.25	-60.3438		-62.7313
							-24.6298	18.2792								-9.71448	-5.43158								-20.8378	-10.9724														-67.5437	-67.1625		-66.8312	-66.5219		-58.25	-60.3438		-62.7313
							-24.2782	16.8297								-9.82435	-5.55353								-21.0662	-11.8548														-67.5938	-66.9469		-66.7906	-66.525		-58.1969	-60.4156		-62.7156
							-23.9566	15.2923								-9.93662	-5.67229								-21.312	-12.7075														-67.5938	-66.9469		-66.7906	-66.525		-58.1969	-60.4156		-62.7156
							-23.6665	13.6754								-10.0512	-5.78761								-21.5745	-13.5302														-67.5062	-66.9375		-66.7594	-66.6312		-58.1688	-60.4906		-62.725
							-23.4096	11.988								-10.1681	-5.89924								-21.8532	-14.3219														-67.5062	-66.9375		-66.7594	-66.6312		-58.1688	-60.4906		-62.725
							-23.187	10.2396								-10.2872	-6.00691								-22.1474	-15.0821														-67.3688	-66.9187		-66.6656	-66.85		-58.2469	-60.5187		-62.7437
							-23	8.43964								-10.4084	-6.11026								-22.4564	-15.8101														-67.3688	-66.9187		-66.6656	-66.85		-58.2469	-60.5187		-62.7437
							-22.8494	6.598								-10.5316	-6.2089								-22.7798	-16.5052														-67.4094	-66.9062		-66.5781	-66.7469		-58.3469	-60.4656		-62.7281
							-22.7361	4.72407								-10.6568	-6.30238								-23.1167	-17.1668														-67.4094	-66.9062		-66.5781	-66.7469		-58.3469	-60.4656		-62.7281
							-22.6605	2.82726								-10.7837	-6.39033								-23.4664	-17.7942														-67.4781	-66.9031		-66.4812	-66.7062		-58.425	-60.4062		-62.7562
							-22.623	0.916815								-10.9124	-6.4724								-23.8284	-18.3871														-67.4781	-66.9031		-66.4812	-66.7062		-58.425	-60.4062		-62.7562
							-22.6238	-0.998497								-11.0426	-6.54805								-24.2019	-18.9448														-67.475	-67.0219		-66.5563	-66.7125		-58.3094	-60.4562		-62.7406
							-22.6629	-2.90995								-11.1743	-6.61697								-24.5862	-19.467														-67.475	-67.0219		-66.5563	-66.7125		-58.3094	-60.4562		-62.7406
							-22.7402	-4.80909								-11.3073	-6.67884								-24.9806	-19.9533														-67.3187	-67.05		-66.7687	-66.8		-58.25	-60.3469		-62.5906
							-22.8553	-6.68774								-11.4414	-6.73335								-25.3844	-20.4035														-67.3187	-67.05		-66.7687	-66.8		-58.25	-60.3469		-62.5906
							-23.0077	-8.53801								-11.5766	-6.78022								-25.7967	-20.8171														-67.2562	-66.9719		-66.6125	-66.8344		-58.1875	-60.3875		-62.6937
							-23.1968	-10.3522								-11.7127	-6.81918								-26.217	-21.1936														-67.2562	-66.9719		-66.6125	-66.8344		-58.1875	-60.3875		-62.6937
							-23.4218	-12.1224								-11.8494	-6.85015								-26.6445	-21.5328														-55.2156	-58.3687		-54.3469	-58.1906		-41.675	-44.8812		-62.7719
							-23.6817	-13.8413								-11.9867	-6.87299								-27.0783	-21.8344														-55.2156	-58.3687		-54.3469	-58.1906		-41.675	-44.8812		-62.7719
							-23.9755	-15.5013								-12.1243	-6.8876								-27.5179	-22.0976														-55.7687	-55.7406		-54.7313	-55.5094		-45.65	-45.5969		-74.4062
							-24.3018	-17.0952								-12.2622	-6.89394								-27.9623	-22.3217														-55.7687	-55.7406		-54.7313	-55.5094		-45.65	-45.5969		-74.4062
							-24.6593	-18.6162								-12.4001	-6.89201								-28.4107	-22.5061														-64.3625	-63		-63.35	-62.7		-53.2031	-56.8344		-73.8312
							-25.0464	-20.0573								-12.5378	-6.88193								-28.8625	-22.6501														-64.3625	-63		-63.35	-62.7		-53.2031	-56.8344		-73.8312
							-25.4616	-21.4119								-12.6753	-6.86359								-29.3167	-22.7528														-67.6437	-66.9469		-66.9313	-66.7		-55.5312	-60.8344		-68.7594
							-25.9029	-22.6742								-12.8124	-6.83708								-29.7726	-22.8134														-67.6437	-66.9469		-66.9313	-66.7		-55.5312	-60.8344		-68.7594
							-26.3685	-23.8386								-12.9488	-6.80256								-30.2293	-22.8314														-69.4531	-69.0437		-68.7969	-68.9125		-58.0219	-62.3125		-64.5156
							-26.8564	-24.9004								-13.0845	-6.75995								-30.6859	-22.8061														-69.4531	-69.0437		-68.7969	-68.9125		-58.0219	-62.3125		-64.5156
							-27.3645	-25.8553								-13.2192	-6.70941								-31.1415	-22.7374														-84.1	-80.4		-83.5219	-80.225		-78.3406	-80.6188		-52.4031
							-27.8906	-26.7								-13.3529	-6.65109								-31.5954	-22.6253														-84.1	-80.4		-83.5219	-80.225		-78.3406	-80.6188		-52.4031
							-28.4325	-27.4324								-13.4853	-6.58503								-32.0465	-22.4699														-81.9875	-80.1687		-81.4	-80.1312		-73.5344	-77.7438		-45
							-28.9879	-28.0509								-13.6163	-6.51145								-32.4942	-22.2723														-81.9875	-80.1687		-81.4	-80.1312		-73.5344	-77.7438		-45
							-29.5546	-28.5554								-13.7457	-6.4306								-32.9374	-22.0333														-72.2	-72.9219		-71.7281	-72.6656		-63.6781	-65.1437		-45.2469
							-30.1302	-28.9467								-13.8735	-6.34265								-33.3755	-21.7546														-72.2	-72.9219		-71.7281	-72.6656		-63.6781	-65.1437		-45.2469
							-30.7124	-29.2265								-13.9994	-6.24814								-33.8076	-21.4383														-67.625	-68.0125		-66.9	-67.6437		-59.6312	-59.55		-49.2313
							-31.2992	-29.3974								-14.1234	-6.14758								-34.233	-21.0867														-67.625	-68.0125		-66.9	-67.6437		-59.6312	-59.55		-49.2313
							-31.8883	-29.4636								-14.2453	-6.0415								-34.6511	-20.7026														-66.2562	-65.8781		-65.3125	-65.5281		-57.8812	-58.4875		-53
							-32.4778	-29.4296								-14.3651	-5.9309								-35.0611	-20.2894														-66.2562	-65.8781		-65.3125	-65.5281		-57.8812	-58.4875		-53
							-33.0655	-29.3005								-14.4826	-5.81658								-35.4627	-19.8504														-58.9375	-60.1656		-58	-59.65		-47.8531	-50		-59.1844
							-33.6498	-29.0823								-14.5977	-5.69971								-35.8551	-19.389														-58.9375	-60.1656		-58	-59.65		-47.8531	-50		-59.1844
							-34.2288	-28.7821								-14.7106	-5.58171								-36.2382	-18.9088														-61.7687	-61.5906		-60.8875	-61.2437		-52.2844	-53.5656		-62.9281
							-34.8011	-28.4062								-14.821	-5.46381								-36.6115	-18.4135														-61.7687	-61.5906		-60.8875	-61.2437		-52.2844	-53.5656		-62.9281
							-35.3651	-27.9618								-14.9291	-5.34768								-36.9748	-17.907														-66.1625	-65.0375		-65.575	-64.8719		-57.2906	-59.8156		-63.3
							-35.9195	-27.4566								-15.0349	-5.235								-37.3278	-17.3927														-66.1625	-65.0375		-65.575	-64.8719		-57.2906	-59.8156		-63.3
							-36.4633	-26.8975								-15.1385	-5.12729								-37.6705	-16.8733														-67.7812	-66.8406		-67.05	-66.6		-58.975	-61.6094		-63.2281
							-36.9954	-26.292								-15.24	-5.02629								-38.0027	-16.3521														-67.7812	-66.8406		-67.05	-66.6		-58.975	-61.6094		-63.2281
							-37.515	-25.647								-15.3396	-4.9336								-38.3245	-15.8319														-67.8656	-67.175		-67.1625	-66.8625		-59.1906	-61.3563		-63.1875
							-38.0213	-24.9692								-15.4374	-4.8506								-38.636	-15.3147														-67.8656	-67.175		-67.1625	-66.8625		-59.1906	-61.3563		-63.1875
							-38.5138	-24.2651								-15.5336	-4.77855								-38.9371	-14.8029														-67.7406	-67.2281		-67.0687	-66.9969		-59.0812	-61.0187		-62.8781
							-38.9919	-23.5407								-15.6285	-4.71852								-39.2281	-14.2981														-67.7406	-67.2281		-67.0687	-66.9969		-59.0812	-61.0187		-62.8781
							-39.4554	-22.802								-15.7223	-4.67117								-39.5091	-13.8017														-67.7406	-67.1875		-66.95	-66.8594		-58.95	-60.8344		-62.6969
							-39.904	-22.0539								-15.8153	-4.63686								-39.7802	-13.3152														-67.7406	-67.1875		-66.95	-66.8594		-58.95	-60.8344		-62.6969
							-40.3376	-21.301								-15.9078	-4.61545								-40.0417	-12.8393														-67.6719	-66.975		-66.9094	-66.8688		-58.95	-60.9062		-62.7
							-40.756	-20.5477								-16	-4.60651								-40.2937	-12.3747														-67.6719	-66.975		-66.9094	-66.8688		-58.95	-60.9062		-62.7
							-41.1595	-19.798								-16.0921	-4.60932								-40.5366	-11.9224														-67.5	-66.9094		-66.8781	-66.8719		-58.925	-60.9125		-62.6281
							-41.548	-19.0552								-16.1843	-4.6227								-40.7706	-11.4828														-67.5	-66.9094		-66.8781	-66.8719		-58.925	-60.9125		-62.6281
							-41.9217	-18.3224								-16.277	-4.64511								-40.996	-11.0561														-67.4469	-66.8594		-66.9313	-66.8688		-58.875	-60.85		-62.6437
							-42.2809	-17.6018								-16.3701	-4.67472								-41.2129	-10.6428														-67.4469	-66.8594		-66.9313	-66.8688		-58.875	-60.85		-62.6437
							-42.6258	-16.8954								-16.464	-4.70963								-41.4217	-10.2431														-67.4375	-66.9		-66.8281	-66.9406		-58.7906	-60.7		-62.725
							-42.9567	-16.2054								-16.5585	-4.74787								-41.6226	-9.85756														-67.4375	-66.9		-66.8281	-66.9406		-58.7906	-60.7		-62.725
							-43.274	-15.533								-16.6539	-4.78721								-41.816	-9.48629														-67.4094	-67.0406		-66.7969	-66.9156		-58.7844	-60.6		-62.5906
							-43.578	-14.8793								-16.75	-4.82559								-42.0021	-9.12905														-67.4094	-67.0406		-66.7969	-66.9156		-58.7844	-60.6		-62.5906
							-43.8691	-14.2455								-16.8469	-4.86126								-42.1811	-8.78582														-67.6281	-67.0031		-66.7156	-66.875		-58.7125	-60.6906		-62.6562
							-44.1478	-13.6316								-16.9445	-4.89244								-42.3535	-8.45709														-67.6281	-67.0031		-66.7156	-66.875		-58.7125	-60.6906		-62.6562
							-44.4144	-13.0383								-17.0426	-4.91786								-42.5194	-8.14276														-67.5594	-67.1		-66.5938	-66.8906		-58.55	-60.7188		-62.6156
							-44.6693	-12.4659								-17.1412	-4.93646								-42.6792	-7.84245														-67.5594	-67.1		-66.5938	-66.8906		-58.55	-60.7188		-62.6156
							-44.913	-11.9145								-17.2401	-4.94752								-42.8331	-7.55587														-67.4125	-67.1656		-66.6687	-66.8		-58.6688	-60.6812		-62.7437
							-45.1459	-11.384								-17.3391	-4.95086								-42.9814	-7.28292														-67.4125	-67.1656		-66.6687	-66.8		-58.6688	-60.6812		-62.7437
							-45.3684	-10.8742								-17.4381	-4.94637								-43.1244	-7.02305														-67.5781	-67.0281		-66.6344	-66.9969		-58.7062	-60.7		-62.5844
							-45.5809	-10.385								-17.5369	-4.93469								-43.2624	-6.77586														-67.5781	-67.0281		-66.6344	-66.9969		-58.7062	-60.7		-62.5844
							-45.7838	-9.91602								-17.6355	-4.91648								-43.3955	-6.54116														-67.6	-66.9375		-66.6906	-66.9344		-58.5406	-60.4688		-62.5125
							-45.9775	-9.46693								-17.7336	-4.89235								-43.524	-6.31809														-67.6	-66.9375		-66.6906	-66.9344		-58.5406	-60.4688		-62.5125
							-46.1625	-9.03711								-17.8312	-4.8635								-43.6482	-6.10628														-67.6562	-66.9594		-66.6781	-66.8406		-58.6063	-60.675		-62.4688
							-46.339	-8.62637								-17.9281	-4.83098								-43.7683	-5.90506														-67.6562	-66.9594		-66.6781	-66.8406		-58.6063	-60.675		-62.4688
							-46.5075	-8.23421								-18.0244	-4.79598								-43.8844	-5.71394														-67.5938	-67.05		-66.6031	-66.8312		-58.6094	-60.6531		-62.4813
							-46.6684	-7.85971								-18.12	-4.75917								-43.9968	-5.53207														-67.5938	-67.05		-66.6031	-66.8312		-58.6094	-60.6531		-62.4813
							-46.8219	-7.50237								-18.2148	-4.72131								-44.1057	-5.35898														-67.4688	-67.25		-66.6562	-66.825		-58.5906	-60.4875		-62.6437
							-46.9685	-7.16152								-18.3088	-4.68307								-44.2112	-5.19466														-67.4688	-67.25		-66.6562	-66.825		-58.5906	-60.4875		-62.6437
							-47.1084	-6.83622								-18.4021	-4.64473								-44.3135	-5.03769														-67.5062	-67.2844		-66.85	-66.8438		-58.6031	-60.6187		-62.6781
							-47.2419	-6.5259								-18.4946	-4.60634								-44.4127	-4.88758														-67.5062	-67.2844		-66.85	-66.8438		-58.6031	-60.6187		-62.6781
							-47.3694	-6.22988								-18.5864	-4.56762								-44.509	-4.74434														-67.5062	-67.2812		-66.6875	-66.7969		-58.7406	-60.8094		-62.7062
							-47.4911	-5.94702								-18.6773	-4.52819								-44.6025	-4.60682														-67.5062	-67.2812		-66.6875	-66.7969		-58.7406	-60.8094		-62.7062
							-47.6073	-5.67665								-18.7675	-4.48761								-44.6932	-4.47445														-67.5156	-67.0812		-66.8312	-66.8		-58.7562	-60.675		-62.6344
							-47.7182	-5.41821								-18.8568	-4.44512								-44.7814	-4.34685														-67.5156	-67.0812		-66.8312	-66.8		-58.7562	-60.675		-62.6344
							-47.824	-5.17101								-18.9453	-4.39997								-44.8671	-4.22344														-67.4719	-67.1		-66.7687	-66.8125		-58.6219	-60.5156		-62.6594
							-47.925	-4.93422								-19.0328	-4.35166								-44.9504	-4.10357														-67.4719	-67.1		-66.7687	-66.8125		-58.6219	-60.5156		-62.6594
							-48.0214	-4.70734								-19.1194	-4.29959								-45.0313	-3.98693														-67.4594	-67.15		-66.55	-66.7312		-58.7625	-60.5375		-62.6937
							-48.1133	-4.48999								-19.2048	-4.24333								-45.1098	-3.87297														-67.4594	-67.15		-66.55	-66.7312		-58.7625	-60.5375		-62.6937
							-48.201	-4.28162								-19.2891	-4.18277								-45.1862	-3.76158														-67.35	-67.2875		-66.7531	-66.6719		-58.7687	-60.5875		-62.6063
							-48.2846	-4.0823								-19.3721	-4.11816								-45.2603	-3.65295														-67.35	-67.2875		-66.7531	-66.6719		-58.7687	-60.5875		-62.6063
							-48.3643	-3.89185								-19.4538	-4.04978								-45.3323	-3.54605														-67.45	-67.1156		-66.7562	-66.8344		-58.7656	-60.8969		-62.7
							-48.4403	-3.70913								-19.5341	-3.97835								-45.4022	-3.44143														-67.45	-67.1156		-66.7562	-66.8344		-58.7656	-60.8969		-62.7
							-48.5127	-3.53441								-19.6129	-3.90472								-45.47	-3.33967														-67.25	-67.1094		-66.75	-66.8937		-58.7938	-60.6812		-62.6437
							-48.5816	-3.36761								-19.6903	-3.82991								-45.5357	-3.24039														-67.25	-67.1094		-66.75	-66.8937		-58.7938	-60.6812		-62.6437
							-48.6474	-3.20835								-19.7661	-3.75528								-45.5996	-3.14436														-67.4656	-67.1094		-66.8344	-66.8156		-58.85	-60.625		-62.7219
							-48.71	-3.05653								-19.8405	-3.68228								-45.6615	-3.05176														-67.4656	-67.1094		-66.8344	-66.8156		-58.85	-60.625		-62.7219
							-48.7696	-2.91157								-19.9134	-3.61223								-45.7216	-2.96297														-67.4094	-66.9938		-66.8281	-66.75		-58.8312	-60.6625		-62.6406
							-48.8264	-2.77328								-19.985	-3.54629								-45.78	-2.87857														-67.4094	-66.9938		-66.8281	-66.75		-58.8312	-60.6625		-62.6406
							-48.8806	-2.6413								-20.0553	-3.48573								-45.8368	-2.79846														-67.4812	-66.9094		-66.7469	-66.8375		-58.7812	-60.6719		-62.6594
							-48.9321	-2.51522								-20.1244	-3.4317								-45.892	-2.72322														-67.4812	-66.9094		-66.7469	-66.8375		-58.7812	-60.6719		-62.6594
							-48.9812	-2.39487								-20.1926	-3.38502								-45.9457	-2.65303														-67.55	-67.0687		-66.6844	-66.8031		-58.8219	-60.7062		-62.6937
							-49.0279	-2.28004								-20.2598	-3.3462								-45.9981	-2.5876														-67.55	-67.0687		-66.6844	-66.8031		-58.8219	-60.7062		-62.6937
							-49.0724	-2.1699								-20.3264	-3.31564								-46.0492	-2.52657														-67.5563	-67.0469		-66.7687	-66.7469		-58.7094	-60.675		-62.5906
							-49.1147	-2.06451								-20.3925	-3.29337								-46.0992	-2.46964														-67.5563	-67.0469		-66.7687	-66.7469		-58.7094	-60.675		-62.5906
							-49.1549	-1.96419								-20.4581	-3.27916								-46.148	-2.41661														-67.4313	-66.8812		-66.5594	-66.7156		-58.6969	-60.7437		-62.75
							-49.1932	-1.86834								-20.5236	-3.27272								-46.1958	-2.36645														-67.4313	-66.8812		-66.5594	-66.7156		-58.6969	-60.7437		-62.75
							-49.2297	-1.77727								-20.589	-3.27358								-46.2427	-2.31838														-67.4469	-66.7844		-66.6125	-66.75		-58.5531	-60.7219		-62.8594
							-49.2643	-1.69086								-20.6546	-3.28093								-46.2886	-2.27213														-67.4469	-66.7844		-66.6125	-66.75		-58.5531	-60.7219		-62.8594
							-49.2973	-1.60894								-20.7203	-3.29399								-46.3335	-2.22645														-67.3469	-66.75		-66.8	-66.8125		-58.6063	-60.7156		-62.7531
							-49.3287	-1.53217								-20.7863	-3.31202								-46.3776	-2.18105														-67.3469	-66.75		-66.8	-66.8125		-58.6063	-60.7156		-62.7531
							-49.3586	-1.46027								-20.8528	-3.33409								-46.4208	-2.13547														-67.3656	-66.8187		-66.7625	-66.9		-58.6187	-60.5562		-62.6094
							-49.3871	-1.39303								-20.9197	-3.35951								-46.463	-2.08902														-67.3656	-66.8187		-66.7625	-66.9		-58.6187	-60.5562		-62.6094
							-49.4143	-1.33057								-20.9871	-3.38745								-46.5043	-2.04163														-67.5281	-66.8969		-66.7062	-66.9313		-58.6562	-60.3625		-62.5594
							-49.4403	-1.27287								-21.0552	-3.4173								-46.5447	-1.99308														-67.5281	-66.8969		-66.7062	-66.9313		-58.6562	-60.3625		-62.5594
							-49.4652	-1.21984								-21.1238	-3.44839								-46.5841	-1.94387														-67.3625	-67.1969		-66.7406	-66.9469		-58.7313	-60.4437		-62.6688
							-49.4891	-1.17064								-21.1931	-3.48015								-46.6225	-1.89428														-67.3625	-67.1969		-66.7406	-66.9469		-58.7313	-60.4437		-62.6688
							-49.5121	-1.12486								-21.263	-3.51214								-46.6598	-1.84431														-67.2281	-67.0469		-66.7687	-66.8156		-58.6469	-60.5312		-62.7531
							-49.5341	-1.08213								-21.3336	-3.5439								-46.6962	-1.79472														-67.2281	-67.0469		-66.7687	-66.8156		-58.6469	-60.5312		-62.7531
							-49.5553	-1.04198								-21.4048	-3.57504								-46.7316	-1.74637														-67.2875	-67.0406		-66.7	-66.7719		-58.6094	-60.5719		-62.6187
							-49.5758	-1.00393								-21.4766	-3.60498								-46.7661	-1.69935														-67.2875	-67.0406		-66.7	-66.7719		-58.6094	-60.5719		-62.6187
							-49.5955	-0.967026								-21.549	-3.63317								-46.7996	-1.65386														-67.3656	-66.9219		-66.7719	-66.8375		-58.5687	-60.5531		-62.6844
							-49.6145	-0.930977								-21.6219	-3.6592								-46.8322	-1.61066														-67.3656	-66.9219		-66.7719	-66.8375		-58.5687	-60.5531		-62.6844
							-49.6327	-0.8955								-21.6954	-3.68247								-46.864	-1.56956														-67.3781	-67.025		-66.6562	-66.6687		-58.5687	-60.6063		-62.7844
							-49.6503	-0.859737								-21.7692	-3.70221								-46.895	-1.53036														-67.3781	-67.025		-66.6562	-66.6687		-58.5687	-60.6063		-62.7844
							-49.6671	-0.823402								-21.8435	-3.71766								-46.9252	-1.49355														-67.25	-67.0844		-66.7687	-66.7188		-58.6281	-60.5125		-62.7
							-49.6832	-0.7864								-21.9179	-3.72829								-46.9548	-1.45817														-67.25	-67.0844		-66.7687	-66.7188		-58.6281	-60.5125		-62.7
							-49.6986	-0.748539								-21.9926	-3.73335								-46.9836	-1.42393														-67.25	-66.9187		-66.5563	-66.6875		-58.6594	-60.45		-62.7594
							-49.7132	-0.70982								-22.0673	-3.73182								-47.0117	-1.39046														-67.25	-66.9187		-66.5563	-66.6875		-58.6594	-60.45		-62.7594
							-49.727	-0.670147								-22.1419	-3.72343								-47.0392	-1.35689														-67.3156	-66.8937		-66.6375	-66.4938		-58.5375	-60.5		-62.7437
							-49.74	-0.629616								-22.2162	-3.7075								-47.066	-1.32303														-67.3156	-66.8937		-66.6375	-66.4938		-58.5375	-60.5		-62.7437
							-49.7522	-0.588512								-22.2902	-3.68361								-47.0921	-1.28832														-67.3281	-66.9		-66.5969	-66.55		-58.5781	-60.5625		-62.65
							-49.7635	-0.546741								-22.3636	-3.65171								-47.1175	-1.25237														-67.3281	-66.9		-66.5969	-66.55		-58.5781	-60.5625		-62.65
							-49.774	-0.504398								-22.4362	-3.61171								-47.1422	-1.21508														-67.2594	-66.7844		-66.6	-66.6125		-58.75	-60.6594		-62.775
							-49.7837	-0.46196								-22.508	-3.56398								-47.1661	-1.17655														-67.2594	-66.7844		-66.6	-66.6125		-58.75	-60.6594		-62.775
							-49.7925	-0.419521								-22.5788	-3.50895								-47.1893	-1.13678														-67.1062	-66.8312		-66.45	-66.7062		-58.5875	-60.55		-62.7094
							-49.8005	-0.377369								-22.6484	-3.44744								-47.2116	-1.09634														-67.1062	-66.8312		-66.45	-66.7062		-58.5875	-60.55		-62.7094
							-49.8076	-0.335598								-22.7167	-3.38039								-47.2331	-1.05572														-66.9844	-66.8125		-66.3375	-66.7656		-58.5562	-60.6656		-62.7344
							-49.8139	-0.294781								-22.7836	-3.30901								-47.2538	-1.01557														-66.9844	-66.8125		-66.3375	-66.7656		-58.5562	-60.6656		-62.7344
							-49.8194	-0.255489								-22.849	-3.23467								-47.2737	-0.976658														-67.0062	-66.9094		-66.2969	-66.7719		-58.475	-60.5312		-62.7906
							-49.8241	-0.217724								-22.913	-3.15857								-47.2929	-0.939178														-67.0062	-66.9094		-66.2969	-66.7719		-58.475	-60.5312		-62.7906
							-49.8281	-0.182152								-22.9754	-3.08242								-47.3113	-0.904465														-67.0969	-66.9562		-65.9406	-66.8094		-58.5312	-60.6187		-62.7031
							-49.8314	-0.149155								-23.0363	-3.00756								-47.3291	-0.87328														-67.0969	-66.9562		-65.9406	-66.8094		-58.5312	-60.6187		-62.7031
							-49.8341	-0.1194								-23.0957	-2.93531								-47.3462	-0.845623														-67.1531	-66.8031		-65.5906	-66.7562		-58.5844	-60.6187		-62.675
							-49.8362	-0.0933647								-23.1537	-2.86708								-47.3629	-0.82159														-67.1531	-66.8031		-65.5906	-66.7562		-58.5844	-60.6187		-62.675
							-49.8378	-0.0712395								-23.2104	-2.80361								-47.3791	-0.801659														-67.15	-66.8562		-65.4437	-66.7094		-58.3687	-60.6656		-62.525
							-49.839	-0.0535011								-23.2658	-2.74577								-47.395	-0.785828														-67.15	-66.8562		-65.4437	-66.7094		-58.3687	-60.6656		-62.525
							-49.8399	-0.0403404								-23.3202	-2.69399								-47.4105	-0.773239														-66.9875	-66.975		-65.0969	-66.5625		-58.425	-60.5156		-62.5125
							-49.8406	-0.0315666								-23.3736	-2.6485								-47.4259	-0.763798														-66.9875	-66.975		-65.0969	-66.5625		-58.425	-60.5156		-62.5125
							-49.8412	-0.0272751								-23.4261	-2.60916								-47.4411	-0.757122														-66.95	-66.8688		-64.7344	-66.6813		-58.3969	-60.5812		-62.55
							-49.8417	-0.0273705								-23.478	-2.57545								-47.4562	-0.752163														-66.95	-66.8688		-64.7344	-66.6813		-58.3969	-60.5812		-62.55
							-49.8423	-0.0310898								-23.5292	-2.54703								-47.4712	-0.747776														-66.6531	-66.8688		-64.3656	-66.7406		-58.55	-60.3812		-62.65
							-49.843	-0.0376701								-23.5798	-2.52295								-47.4861	-0.74358														-66.6531	-66.8688		-64.3656	-66.7406		-58.55	-60.3812		-62.65
							-49.8438	-0.0462532								-23.6301	-2.50225								-47.5009	-0.738907														-66.3406	-66.8312		-64.1344	-66.6312		-58.3687	-60.4094		-62.6156
							-49.8448	-0.0557899								-23.6799	-2.48399								-47.5156	-0.732803														-66.3406	-66.8312		-64.1344	-66.6312		-58.3687	-60.4094		-62.6156
							-49.846	-0.0655174								-23.7294	-2.46701								-47.5302	-0.724983														-66.3375	-66.7625		-63.7938	-66.5531		-58.175	-60.4781		-62.6125
							-49.8475	-0.0741959								-23.7786	-2.45051								-47.5446	-0.71516														-66.3375	-66.7625		-63.7938	-66.5531		-58.175	-60.4781		-62.6125
							-49.849	-0.0805855								-23.8275	-2.43373								-47.5588	-0.703335														-66.5437	-66.8		-63.4	-66.4719		-58.0781	-60.3		-62.4875
							-49.8507	-0.0840187								-23.876	-2.41599								-47.5728	-0.689602														-66.5437	-66.8		-63.4	-66.4719		-58.0781	-60.3		-62.4875
							-49.8524	-0.0835419								-23.9241	-2.39673								-47.5864	-0.674248														-66.6	-66.65		-63.0906	-66.4906		-58.1656	-60.4469		-62.5344
							-49.854	-0.0784874								-23.9718	-2.37579								-47.5997	-0.657463														-66.6	-66.65		-63.0906	-66.4906		-58.1656	-60.4469		-62.5344
							-49.8555	-0.0683784								-24.0191	-2.35319								-47.6127	-0.640202														-66.3656	-66.6531		-62.8937	-66.4844		-58.0781	-60.1719		-62.5375
							-49.8568	-0.0530243								-24.066	-2.32902								-47.6254	-0.62294														-66.3656	-66.6531		-62.8937	-66.4844		-58.0781	-60.1719		-62.5375
							-49.8576	-0.0324249								-24.1123	-2.30365								-47.6376	-0.606251														-66.2375	-66.5563		-62.6312	-66.4562		-57.8812	-60.1688		-62.4844
							-49.858	-0.00648499								-24.1581	-2.27757								-47.6496	-0.590992														-66.2375	-66.5563		-62.6312	-66.4562		-57.8812	-60.1688		-62.4844
							-49.8579	0.0238419								-24.2034	-2.25115								-47.6613	-0.577545														-66.1813	-66.5312		-62.3156	-66.2875		-57.8781	-60.0187		-62.4219
							-49.8571	0.057888								-24.2481	-2.22521								-47.6727	-0.566387														-66.1813	-66.5312		-62.3156	-66.2875		-57.8781	-60.0187		-62.4219
							-49.8556	0.0950813								-24.2924	-2.20027								-47.6839	-0.557804														-66.0094	-66.575		-62.0562	-66.4344		-57.7969	-59.875		-62.3125
							-49.8533	0.134182								-24.3362	-2.17671								-47.695	-0.551987														-66.0094	-66.575		-62.0562	-66.4344		-57.7969	-59.875		-62.3125
							-49.8502	0.174236								-24.3795	-2.15507								-47.706	-0.548649														-65.9	-66.5719		-61.8312	-66.5156		-57.7687	-59.6844		-62.3937
							-49.8463	0.214195								-24.4224	-2.13556								-47.717	-0.5476														-65.9	-66.5719		-61.8312	-66.5156		-57.7687	-59.6844		-62.3937
							-49.8416	0.25301								-24.4649	-2.11844								-47.7279	-0.548553														-65.8594	-66.575		-61.7781	-66.3875		-57.75	-59.7719		-62.3
							-49.8362	0.289631								-24.5071	-2.10376								-47.7389	-0.550938														-65.8594	-66.575		-61.7781	-66.3875		-57.75	-59.7719		-62.3
							-49.8301	0.323105								-24.549	-2.0915								-47.75	-0.553703														-65.8937	-66.4656		-61.6656	-66.3906		-57.6	-59.6656		-62.4
							-49.8233	0.352669								-24.5908	-2.08149								-47.7611	-0.55666														-65.8937	-66.4656		-61.6656	-66.3906		-57.6	-59.6656		-62.4
							-49.8159	0.37775								-24.6323	-2.07348								-47.7722	-0.559521														-65.8469	-66.4281		-61.4062	-66.2375		-57.75	-59.6		-62.5031
							-49.8082	0.398254								-24.6737	-2.06738								-47.7834	-0.560951														-65.8469	-66.4281		-61.4062	-66.2375		-57.75	-59.6		-62.5031
							-49.8	0.413704								-24.715	-2.06299								-47.7947	-0.560474														-65.7	-66.6094		-61.125	-65.9344		-57.6844	-59.5344		-62.2719
																-24.7562	-2.05998																							-65.7	-66.6094		-61.125	-65.9344		-57.6844	-59.5344		-62.2719
																-24.7974	-2.05817																							-65.3937	-66.4		-60.8812	-66.0094		-57.5375	-59.1187		-62.1281
																-24.8385	-2.05755																							-65.3937	-66.4		-60.8812	-66.0094		-57.5375	-59.1187		-62.1281
																-24.8797	-2.05817																							-65.4	-66.4062		-60.8781	-66.1312		-57.4188	-58.9531		-62.125
																-24.9209	-2.05984																							-65.4	-66.4062		-60.8781	-66.1312		-57.4188	-58.9531		-62.125
																-24.9621	-2.06256																							-65.3656	-66.4875		-60.6562	-66.05		-57.2812	-59		-62.0875
																-25.0034	-2.06656																							-65.3656	-66.4875		-60.6562	-66.05		-57.2812	-59		-62.0875
																-25.0448	-2.07171																							-65.2812	-66.3125		-60.4062	-65.9562		-57.2594	-58.8937		-61.8844
																-25.0862	-2.07801																							-65.2812	-66.3125		-60.4062	-65.9562		-57.2594	-58.8937		-61.8844
																-25.1279	-2.0854																							-65.3375	-66.1125		-60.3594	-65.8312		-57.1594	-58.6812		-61.9906
																-25.1697	-2.0937																							-65.3375	-66.1125		-60.3594	-65.8312		-57.1594	-58.6812		-61.9906
																-25.2116	-2.10261																							-65.2937	-65.8656		-59.8687	-65.6188		-57.125	-58.45		-61.875
																-25.2538	-2.11172																							-65.2937	-65.8656		-59.8687	-65.6188		-57.125	-58.45		-61.875
																-25.2961	-2.12054																							-65.0719	-65.8187		-59.775	-65.6781		-57.0719	-58.2687		-61.8406
																-25.3386	-2.12836																							-65.0719	-65.8187		-59.775	-65.6781		-57.0719	-58.2687		-61.8406
																-25.3812	-2.13466																							-64.8688	-66.0625		-59.8563	-65.7469		-57.0062	-58.3812		-61.9688
																-25.424	-2.13876																							-64.8688	-66.0625		-59.8563	-65.7469		-57.0062	-58.3812		-61.9688
																-25.4668	-2.13981																							-64.8094	-66.0312		-59.7156	-65.4313		-56.8187	-58.0125		-61.8937
																-25.5096	-2.13737																							-64.8094	-66.0312		-59.7156	-65.4313		-56.8187	-58.0125		-61.8937
																-25.5523	-2.13094																							-64.7937	-66.0469		-59.3687	-65.3656		-56.8281	-58.0062		-61.7781
																-25.5948	-2.12011																							-64.7937	-66.0469		-59.3687	-65.3656		-56.8281	-58.0062		-61.7781
																-25.6371	-2.10476																							-64.65	-66.0406		-59.1344	-65.4062		-56.8438	-57.8687		-61.6781
																-25.679	-2.08468																							-64.65	-66.0406		-59.1344	-65.4062		-56.8438	-57.8687		-61.6781
																-25.7205	-2.06027																							-64.45	-66		-59.1031	-65.2844		-56.5594	-57.8062		-61.7156
																-25.7614	-2.03185																							-64.45	-66		-59.1031	-65.2844		-56.5594	-57.8062		-61.7156
																-25.8017	-1.9999																							-64.5	-66.0125		-59.05	-65.1594		-56.4813	-57.55		-61.6375
																-25.8414	-1.96524																							-64.5	-66.0125		-59.05	-65.1594		-56.4813	-57.55		-61.6375
																-25.8803	-1.92838																							-64.5125	-66.0344		-58.9813	-65.1469		-56.5281	-57.2812		-61.55
																-25.9185	-1.89004																							-64.5125	-66.0344		-58.9813	-65.1469		-56.5281	-57.2812		-61.55
																-25.9559	-1.85118																							-64.4906	-66.0281		-58.75	-64.9594		-56.4406	-57.2344		-61.4281
																-25.9926	-1.81236																							-64.4906	-66.0281		-58.75	-64.9594		-56.4406	-57.2344		-61.4281
																-26.0284	-1.77422																							-64.25	-66.0375		-58.5062	-64.7656		-56.3375	-57.2		-61.425
																-26.0636	-1.73712																							-64.25	-66.0375		-58.5062	-64.7656		-56.3375	-57.2		-61.425
																-26.0979	-1.70126																							-64.1062	-66.05		-58.2437	-64.7969		-56.3781	-57.0687		-61.3438
																-26.1316	-1.66698																							-64.1062	-66.05		-58.2437	-64.7969		-56.3781	-57.0687		-61.3438
																-26.1646	-1.63398																							-63.9125	-66.0187		-58.1125	-64.8187		-56.3062	-57.0406		-61.3469
																-26.197	-1.60217																							-63.9125	-66.0187		-58.1125	-64.8187		-56.3062	-57.0406		-61.3469
																-26.2287	-1.57156																							-63.85	-65.9125		-58.0719	-64.5875		-56.1688	-56.8625		-61.2781
																-26.2598	-1.54176																							-63.85	-65.9125		-58.0719	-64.5875		-56.1688	-56.8625		-61.2781
																-26.2904	-1.51238																							-63.9312	-65.8625		-58.0625	-64.5531		-56.0438	-56.8594		-61.05
																-26.3203	-1.48335																							-63.9312	-65.8625		-58.0625	-64.5531		-56.0438	-56.8594		-61.05
																-26.3497	-1.45445																							-63.9188	-66		-58.0094	-64.4594		-55.9406	-56.925		-61.0375
																-26.3785	-1.42555																							-63.9188	-66		-58.0094	-64.4594		-55.9406	-56.925		-61.0375
																-26.4067	-1.39694																							-63.8969	-65.7937		-57.9219	-64.5437		-55.8687	-56.6656		-61.0219
																-26.4344	-1.36867																							-63.8969	-65.7937		-57.9219	-64.5437		-55.8687	-56.6656		-61.0219
																-26.4615	-1.34106																							-63.7969	-65.7937		-57.7281	-64.5687		-56.0062	-56.5812		-61.0469
																-26.488	-1.31478																							-63.7969	-65.7937		-57.7281	-64.5687		-56.0062	-56.5812		-61.0469
																-26.5141	-1.29018																							-63.8	-65.7781		-57.6688	-64.2687		-55.9813	-56.3687		-60.8438
																-26.5396	-1.26786																							-63.8	-65.7781		-57.6688	-64.2687		-55.9813	-56.3687		-60.8438
																-26.5648	-1.24855																							-63.575	-65.7281		-57.5062	-64.1		-55.7906	-56.2		-60.7406
																-26.5896	-1.23277																							-63.575	-65.7281		-57.5062	-64.1		-55.7906	-56.2		-60.7406
																-26.6141	-1.22104																							-63.4375	-65.7531		-57.2687	-63.9437		-55.6688	-56.025		-60.6344
																-26.6384	-1.21374																							-63.4375	-65.7531		-57.2687	-63.9437		-55.6688	-56.025		-60.6344
																-26.6626	-1.21121																							-63.45	-65.8187		-57.1594	-64.1469		-55.375	-56.0469		-60.65
																-26.6869	-1.21355																							-63.45	-65.8187		-57.1594	-64.1469		-55.375	-56.0469		-60.65
																-26.7112	-1.22046																							-63.3094	-65.5781		-57.175	-64.0625		-55.3781	-55.7969		-60.6406
																-26.7357	-1.23167																							-63.3094	-65.5781		-57.175	-64.0625		-55.3781	-55.7969		-60.6406
																-26.7604	-1.24669																							-63.3312	-65.3969		-57.075	-63.9937		-55.2062	-55.6562		-60.4781
																-26.7855	-1.26472																							-63.3312	-65.3969		-57.075	-63.9937		-55.2062	-55.6562		-60.4781
																-26.811	-1.28498																							-63.0469	-65.4344		-56.8781	-63.7594		-55.0687	-55.5469		-60.4312
																-26.8369	-1.30639																							-63.0469	-65.4344		-56.8781	-63.7594		-55.0687	-55.5469		-60.4312
																-26.8633	-1.32751																							-62.9	-65.4938		-56.7719	-63.6		-54.9625	-55.8281		-60.4125
																-26.89	-1.34735																							-62.9	-65.4938		-56.7719	-63.6		-54.9625	-55.8281		-60.4125
																-26.9172	-1.36456																							-62.9594	-65.3187		-56.5875	-63.55		-55.0469	-55.6719		-60.3875
																-26.9446	-1.37782																							-62.9594	-65.3187		-56.5875	-63.55		-55.0469	-55.6719		-60.3875
																-26.9723	-1.38621																							-62.8438	-65.2469		-56.5062	-63.4		-54.875	-55.4156		-60.1812
																-27.0001	-1.3886																							-62.8438	-65.2469		-56.5062	-63.4		-54.875	-55.4156		-60.1812
																-27.0278	-1.38407																							-62.7969	-65.15		-56.4906	-63.1625		-54.8656	-55.3125		-60.1906
																-27.0554	-1.372																							-62.7969	-65.15		-56.4906	-63.1625		-54.8656	-55.3125		-60.1906
																-27.0827	-1.35217																							-62.6344	-65.0312		-56.4437	-63.0969		-54.775	-55.425		-60.125
																-27.1095	-1.32437																							-62.6344	-65.0312		-56.4437	-63.0969		-54.775	-55.425		-60.125
																-27.1357	-1.2887																							-62.7281	-64.9156		-56.15	-62.9469		-54.55	-55.3125		-60.0219
																-27.1611	-1.24583																							-62.7281	-64.9156		-56.15	-62.9469		-54.55	-55.3125		-60.0219
																-27.1855	-1.19638																							-62.6	-64.9344		-56.0062	-62.7469		-54.4406	-55.1		-60
																-27.2089	-1.14141																							-62.6	-64.9344		-56.0062	-62.7469		-54.4406	-55.1		-60
																-27.2312	-1.08204																							-62.6781	-65		-55.9281	-62.6781		-54.2781	-54.9875		-59.9375
																-27.2522	-1.01972																							-62.6781	-65		-55.9281	-62.6781		-54.2781	-54.9875		-59.9375
																-27.272	-0.956059																							-62.5625	-64.9719		-55.8469	-62.3438		-54.3156	-54.7719		-59.8781
																-27.2904	-0.892496																							-62.5625	-64.9719		-55.8469	-62.3438		-54.3156	-54.7719		-59.8781
																-27.3077	-0.830603																							-62.5844	-64.8969		-55.7687	-62.2125		-54.2875	-54.7781		-59.8594
																-27.3237	-0.771999																							-62.5844	-64.8969		-55.7687	-62.2125		-54.2875	-54.7781		-59.8594
																-27.3385	-0.718069																							-62.45	-64.6062		-55.6063	-62.0687		-54.2781	-54.6437		-59.8563
																-27.3524	-0.669861																							-62.45	-64.6062		-55.6063	-62.0687		-54.2781	-54.6437		-59.8563
																-27.3653	-0.628471																							-62.5687	-64.5812		-55.4781	-61.85		-53.9813	-54.8594		-59.8156
																-27.3775	-0.594521																							-62.5687	-64.5812		-55.4781	-61.85		-53.9813	-54.8594		-59.8156
																-27.3891	-0.568438																							-62.4969	-64.6344		-55.2656	-61.625		-53.975	-54.925		-59.8031
																-27.4003	-0.550222																							-62.4969	-64.6344		-55.2656	-61.625		-53.975	-54.925		-59.8031
																-27.4111	-0.539637																							-62.3469	-64.5312		-55.2969	-61.5781		-54.0187	-54.6781		-59.5969
																-27.4219	-0.536251																							-62.3469	-64.5312		-55.2969	-61.5781		-54.0187	-54.6781		-59.5969
																-27.4326	-0.539255																							-62.5125	-64.2906		-55.1031	-61.625		-53.7531	-54.35		-59.4094
																-27.4434	-0.547743																							-62.5125	-64.2906		-55.1031	-61.625		-53.7531	-54.35		-59.4094
																-27.4545	-0.56076																							-62.4188	-64.25		-55.0375	-61.5312		-53.6219	-54.325		-59.4531
																-27.4659	-0.577116																							-62.4188	-64.25		-55.0375	-61.5312		-53.6219	-54.325		-59.4531
																-27.4776	-0.595617																							-62.1875	-64.2562		-54.8937	-61.3344		-53.65	-54.525		-59.3219
																-27.4897	-0.615358																							-62.1875	-64.2562		-54.8937	-61.3344		-53.65	-54.525		-59.3219
																-27.5022	-0.635433																							-62.2469	-64.1656		-54.6625	-61.0781		-53.6688	-54.4875		-59.3438
																-27.5151	-0.654984																							-62.2469	-64.1656		-54.6625	-61.0781		-53.6688	-54.4875		-59.3438
																-27.5284	-0.673437																							-62.25	-64.0406		-54.7281	-60.8844		-53.4969	-54.35		-59.2125
																-27.542	-0.690651																							-62.25	-64.0406		-54.7281	-60.8844		-53.4969	-54.35		-59.2125
																-27.556	-0.706434																							-62.2344	-63.9		-54.7469	-60.8937		-53.3406	-54.4031		-59.15
																-27.5703	-0.720739																							-62.2344	-63.9		-54.7469	-60.8937		-53.3406	-54.4031		-59.15
																-27.5848	-0.733948																							-62.1	-63.9531		-54.5	-60.6281		-53.3719	-54.1844		-59.2156
																-27.5997	-0.746298																							-62.1	-63.9531		-54.5	-60.6281		-53.3719	-54.1844		-59.2156
																-27.6147	-0.758123																							-61.9781	-63.9437		-54.4844	-60.7062		-53.25	-54.15		-59.1875
																-27.63	-0.769854																							-61.9781	-63.9437		-54.4844	-60.7062		-53.25	-54.15		-59.1875
																-27.6455	-0.781775																							-62.0094	-63.7812		-54.4219	-60.6875		-53.0844	-54.2437		-59.1312
																-27.6612	-0.794029																							-62.0094	-63.7812		-54.4219	-60.6875		-53.0844	-54.2437		-59.1312
																-27.6773	-0.806761																							-62.0375	-63.7531		-54.4031	-60.7281		-53.0812	-54.1688		-58.8844
																-27.6935	-0.819874																							-62.0375	-63.7531		-54.4031	-60.7281		-53.0812	-54.1688		-58.8844
																-27.71	-0.833082																							-62.0438	-63.8		-54.275	-60.5125		-53.0687	-54.075		-58.9656
																-27.7268	-0.845909																							-62.0438	-63.8		-54.275	-60.5125		-53.0687	-54.075		-58.9656
																-27.7439	-0.857782																							-61.9031	-63.6469		-54.1219	-60.4281		-53.0812	-54.1		-58.95
																-27.7612	-0.86813																							-61.9031	-63.6469		-54.1219	-60.4281		-53.0812	-54.1		-58.95
																-27.7786	-0.876331																							-61.6875	-63.575		-54.1906	-60.2625		-52.9094	-54.1562		-58.7469
																-27.7962	-0.881815																							-61.6875	-63.575		-54.1906	-60.2625		-52.9094	-54.1562		-58.7469
																-27.8139	-0.883818																							-61.6812	-63.5531		-54.1437	-60.15		-52.725	-53.9562		-58.9125
																-27.8316	-0.882149																							-61.6812	-63.5531		-54.1437	-60.15		-52.725	-53.9562		-58.9125
																-27.8492	-0.876665																							-61.7656	-63.4156		-54.2875	-59.8937		-52.775	-54.0344		-58.7281
																-27.8666	-0.867224																							-61.7656	-63.4156		-54.2875	-59.8937		-52.775	-54.0344		-58.7281
																-27.8839	-0.854111																							-61.6625	-63.2531		-53.9875	-59.7875		-52.65	-53.9406		-58.7062
																-27.9008	-0.83766																							-61.6625	-63.2531		-53.9875	-59.7875		-52.65	-53.9406		-58.7062
																-27.9174	-0.818491																							-61.5906	-63.1937		-53.9188	-59.8187		-52.75	-53.8594		-58.8
																-27.9335	-0.797319																							-61.5906	-63.1937		-53.9188	-59.8187		-52.75	-53.8594		-58.8
																-27.9493	-0.774717																							-61.6	-63.3469		-53.9906	-59.7594		-52.7406	-53.925		-58.7156
																-27.9645	-0.751543																							-61.6	-63.3469		-53.9906	-59.7594		-52.7406	-53.925		-58.7156
																-27.9793	-0.728416																							-61.6	-63.1531		-53.8875	-59.6562		-52.5062	-53.9594		-58.6344
																-27.9937	-0.705814																							-61.6	-63.1531		-53.8875	-59.6562		-52.5062	-53.9594		-58.6344
																-28.0076	-0.684261																							-61.7875	-63.0219		-53.7344	-59.6437		-52.625	-53.8656		-58.5375
																-28.021	-0.663805																							-61.7875	-63.0219		-53.7344	-59.6437		-52.625	-53.8656		-58.5375
																-28.0341	-0.644493																							-61.9594	-62.9875		-53.8719	-59.4562		-52.4719	-53.7469		-58.5781
																-28.0468	-0.626087																							-61.9594	-62.9875		-53.8719	-59.4562		-52.4719	-53.7469		-58.5781
																-28.0591	-0.608253																							-61.8187	-62.9562		-53.9531	-59.4312		-52.5062	-53.6844		-58.6187
																-28.0711	-0.590706																							-61.8187	-62.9562		-53.9531	-59.4312		-52.5062	-53.6844		-58.6187
																-28.0828	-0.573111																							-61.5187	-63.1344		-53.8687	-59.3812		-52.4719	-53.7125		-58.5156
																-28.0941	-0.554943																							-61.5187	-63.1344		-53.8687	-59.3812		-52.4719	-53.7125		-58.5156
																-28.105	-0.535774																							-61.5438	-63.1344		-53.8812	-59.3687		-52.3281	-53.7781		-58.4937
																-28.1155	-0.515842																							-61.5438	-63.1344		-53.8812	-59.3687		-52.3281	-53.7781		-58.4937
																-28.1256	-0.495148																							-61.6562	-62.9594		-53.8094	-59.2125		-52.2562	-53.6531		-58.4344
																-28.1353	-0.474024																							-61.6562	-62.9594		-53.8094	-59.2125		-52.2562	-53.6531		-58.4344
																-28.1446	-0.453138																							-61.5344	-62.8281		-53.9844	-59.1812		-52.1781	-53.5		-58.4188
																-28.1534	-0.433445																							-61.5344	-62.8281		-53.9844	-59.1812		-52.1781	-53.5		-58.4188
																-28.1619	-0.416136																							-61.4625	-62.7812		-53.8156	-59.1562		-52.2719	-53.4125		-58.3031
																-28.1701	-0.402451																							-61.4625	-62.7812		-53.8156	-59.1562		-52.2719	-53.4125		-58.3031
																-28.178	-0.39382																							-61.5062	-62.8469		-53.6031	-59.0312		-52.2844	-53.3594		-58.2656
																-28.1858	-0.391531																							-61.5062	-62.8469		-53.6031	-59.0312		-52.2844	-53.3594		-58.2656
																-28.1937	-0.396967																							-61.4188	-62.8312		-53.7656	-59.2219		-52.2469	-53.3281		-58.2687
																-28.2017	-0.411081																							-61.4188	-62.8312		-53.7656	-59.2219		-52.2469	-53.3281		-58.2687
																-28.2101	-0.434685																							-61.3875	-62.8625		-53.6625	-59.3		-52.0781	-53.575		-58.1594
																-28.2191	-0.468349																							-61.3875	-62.8625		-53.6625	-59.3		-52.0781	-53.575		-58.1594
																-28.2288	-0.511885																							-61.3062	-62.8781		-53.7437	-59.2687		-52.1031	-53.6187		-58.1187
																																								-61.3062	-62.8781		-53.7437	-59.2687		-52.1031	-53.6187		-58.1187
																																								-61.4062	-62.8375		-53.7844	-58.9437		-52.1719	-53.5562		-58.05
																																								-61.4062	-62.8375		-53.7844	-58.9437		-52.1719	-53.5562		-58.05
																																								-61.4	-62.7531		-53.5906	-58.7562		-52.0656	-53.5656		-58.1219
																																								-61.4	-62.7531		-53.5906	-58.7562		-52.0656	-53.5656		-58.1219
																																								-61.3906	-62.6		-53.5281	-58.7875		-52.025	-53.4781		-58.0469
																																								-61.3906	-62.6		-53.5281	-58.7875		-52.025	-53.4781		-58.0469
																																								-61.4406	-62.3937		-53.5719	-58.7125		-52.0781	-53.4781		-58.1312
																																								-61.4406	-62.3937		-53.5719	-58.7125		-52.0781	-53.4781		-58.1312
																																								-61.3531	-62.4875		-53.6	-58.6906		-52.0312	-53.3812		-58.0094
																																								-61.3531	-62.4875		-53.6	-58.6906		-52.0312	-53.3812		-58.0094
																																								-61.3687	-62.4594		-53.525	-58.6344		-52.1344	-53.25		-57.9312
																																								-61.3687	-62.4594		-53.525	-58.6344		-52.1344	-53.25		-57.9312
																																								-61.5344	-62.6156		-53.4562	-58.6344		-52.0344	-53.15		-57.9062
																																								-61.5344	-62.6156		-53.4562	-58.6344		-52.0344	-53.15		-57.9062
																																								-61.2594	-62.55		-53.5344	-58.5062		-51.8937	-53.2		-57.8875
																																								-61.2594	-62.55		-53.5344	-58.5062		-51.8937	-53.2		-57.8875
																																								-61.275	-62.45		-53.575	-58.35		-51.8687	-53.3438		-57.9094
																																								-61.275	-62.45		-53.575	-58.35		-51.8687	-53.3438		-57.9094
																																								-61.2687	-62.3		-53.5312	-58.55		-51.9156	-53.5062		-57.9094
																																								-61.2687	-62.3		-53.5312	-58.55		-51.9156	-53.5062		-57.9094
																																								-61.4	-62.1875		-53.4281	-58.7719		-51.8344	-53.4625		-57.8656
																																								-61.4	-62.1875		-53.4281	-58.7719		-51.8344	-53.4625		-57.8656
																																								-61.3187	-62.35		-53.6688	-58.7313		-51.7281	-53.3031		-57.825
																																								-61.3187	-62.35		-53.6688	-58.7313		-51.7281	-53.3031		-57.825
																																								-61.4	-62.3906		-53.65	-58.7594		-51.7156	-53.2625		-57.6594
																																								-61.4	-62.3906		-53.65	-58.7594		-51.7156	-53.2625		-57.6594
																																								-61.3344	-62.2344		-53.5	-58.6969		-51.7313	-53.0125		-57.8344
																																								-61.3344	-62.2344		-53.5	-58.6969		-51.7313	-53.0125		-57.8344
																																								-61.3156	-62.3094		-53.5406	-58.5438		-51.7625	-53.1937		-57.8344
																																								-61.3156	-62.3094		-53.5406	-58.5438		-51.7625	-53.1937		-57.8344
																																								-61.2	-62.2844		-53.3875	-58.3875		-51.7406	-53.35		-57.7938
																																								-61.2	-62.2844		-53.3875	-58.3875		-51.7406	-53.35		-57.7938
																																								-61.2062	-62.2188		-53.4375	-58.5		-51.7219	-53.1812		-57.8031
																																								-61.2062	-62.2188		-53.4375	-58.5		-51.7219	-53.1812		-57.8031
																																								-61.15	-62.2875		-53.6875	-58.4594		-51.6469	-53.3		-57.75
																																								-61.15	-62.2875		-53.6875	-58.4594		-51.6469	-53.3		-57.75
																																								-61.2531	-62.2625		-53.625	-58.3781		-51.8	-53.3094		-57.7031
																																								-61.2531	-62.2625		-53.625	-58.3781		-51.8	-53.3094		-57.7031
																																								-61.15	-62.3406		-53.5938	-58.4844		-51.6875	-53.2		-57.5906
																																								-61.15	-62.3406		-53.5938	-58.4844		-51.6875	-53.2		-57.5906
																																								-61.1781	-62.3		-53.5875	-58.2938		-51.5406	-53.2062		-57.5875
																																								-61.1781	-62.3		-53.5875	-58.2938		-51.5406	-53.2062		-57.5875
																																								-61.1437	-62.1156		-53.5844	-58.1281		-51.4312	-53.1656		-57.7094
																																								-61.1437	-62.1156		-53.5844	-58.1281		-51.4312	-53.1656		-57.7094
																																								-61.0656	-62.0875		-53.5125	-58.2656		-51.4656	-53.1937		-57.5594
																																								-61.0656	-62.0875		-53.5125	-58.2656		-51.4656	-53.1937		-57.5594
																																								-61.1	-62.0906		-53.5312	-58.2594		-51.5	-53.2062		-57.5
																																								-61.1	-62.0906		-53.5312	-58.2594		-51.5	-53.2062		-57.5
																																								-61.2687	-62.2125		-53.4719	-58.25		-51.5187	-53.2031		-57.525
																																								-61.2687	-62.2125		-53.4719	-58.25		-51.5187	-53.2031		-57.525
																																								-61.1531	-62.1031		-53.5	-58.3156		-51.5844	-53.0062		-57.425
																																								-61.1531	-62.1031		-53.5	-58.3156		-51.5844	-53.0062		-57.425
																																								-61.0469	-61.9375		-53.75	-58.4		-51.55	-52.9531		-57.4437
																																								-61.0469	-61.9375		-53.75	-58.4		-51.55	-52.9531		-57.4437
																																								-61.2656	-61.8062		-53.8563	-58.3687		-51.5281	-52.9594		-57.375
																																								-61.2656	-61.8062		-53.8563	-58.3687		-51.5281	-52.9594		-57.375
																																								-61.3312	-61.875		-53.7781	-58.3656		-51.3375	-52.9312		-57.4531
																																								-61.3312	-61.875		-53.7781	-58.3656		-51.3375	-52.9312		-57.4531
																																								-61.2375	-62.1094		-53.7031	-58.2531		-51.45	-52.9156		-57.4562
																																								-61.2375	-62.1094		-53.7031	-58.2531		-51.45	-52.9156		-57.4562
																																								-61.1844	-62.1312		-53.6625	-58.2625		-51.4	-52.9281		-57.45
																																								-61.1844	-62.1312		-53.6625	-58.2625		-51.4	-52.9281		-57.45
																																								-61.0812	-62		-53.7719	-58.1656		-51.3344	-53.1688		-57.4469
																																								-61.0812	-62		-53.7719	-58.1656		-51.3344	-53.1688		-57.4469
																																								-61.0375	-62.1562		-53.7469	-57.9781		-51.2656	-53.275		-57.4562
																																								-61.0375	-62.1562		-53.7469	-57.9781		-51.2656	-53.275		-57.4562
																																								-61.0875	-62.1469		-53.7437	-57.9937		-51.3406	-52.9219		-57.2906
																																								-61.0875	-62.1469		-53.7437	-57.9937		-51.3406	-52.9219		-57.2906
																																								-61.15	-62.1625		-53.6656	-58.2156		-51.3312	-52.8219		-57.3625
																																								-61.15	-62.1625		-53.6656	-58.2156		-51.3312	-52.8219		-57.3625
																																								-61.1562	-62.25		-53.65	-58.2281		-51.2938	-52.6719		-57.4656
																																								-61.1562	-62.25		-53.65	-58.2281		-51.2938	-52.6719		-57.4656
																																								-61.0938	-62.1094		-53.7469	-58.2031		-51.2	-52.6656		-57.2656
																																								-61.0938	-62.1094		-53.7469	-58.2031		-51.2	-52.6656		-57.2656
																																								-60.9813	-61.9375		-53.9562	-58.1625		-51.2969	-52.8531		-57.25
																																								-60.9813	-61.9375		-53.9562	-58.1625		-51.2969	-52.8531		-57.25
																																								-60.9125	-61.8156		-53.9937	-58.1125		-51.2906	-52.9437		-57.1812
																																								-60.9125	-61.8156		-53.9937	-58.1125		-51.2906	-52.9437		-57.1812
																																								-60.9875	-61.9781		-53.9844	-58.1031		-51.1656	-52.8875		-57.2969
																																								-60.9875	-61.9781		-53.9844	-58.1031		-51.1656	-52.8875		-57.2969
																																								-61.0469	-62		-53.8625	-58.2469		-51.0781	-53.0062		-57.2344
																																								-61.0469	-62		-53.8625	-58.2469		-51.0781	-53.0062		-57.2344
																																								-61.1156	-62.0187		-53.8563	-58.1		-51.15	-52.9656		-57.2844
																																								-61.1156	-62.0187		-53.8563	-58.1		-51.15	-52.9656		-57.2844
																																								-61.0719	-62		-53.9906	-57.975		-51.1594	-52.8406		-57.2719
																																								-61.0719	-62		-53.9906	-57.975		-51.1594	-52.8406		-57.2719
																																								-61.1844	-61.9094		-53.8937	-58.1312		-51.2437	-52.8312		-57.1875
																																								-61.1844	-61.9094		-53.8937	-58.1312		-51.2437	-52.8312		-57.1875
																																								-61.1375	-61.9344		-54.1906	-58.1562		-51.2	-52.8406		-57.2188
																																								-61.1375	-61.9344		-54.1906	-58.1562		-51.2	-52.8406		-57.2188
																																								-61.0469	-62.0969		-54.1094	-58.0781		-51.0344	-52.8375		-57.25
																																								-61.0469	-62.0969		-54.1094	-58.0781		-51.0344	-52.8375		-57.25
																																								-61.2094	-62.1656		-53.9594	-57.9781		-51.1375	-52.9281		-57.1562
																																								-61.2094	-62.1656		-53.9594	-57.9781		-51.1375	-52.9281		-57.1562
																																								-61.1406	-62.1281		-53.9562	-57.9781		-51.0906	-53.0344		-57.2531
																																								-61.1406	-62.1281		-53.9562	-57.9781		-51.0906	-53.0344		-57.2531
																																								-61.0875	-62.0375		-54.15	-57.875		-51.0844	-52.9906		-57.2125
																																								-61.0875	-62.0375		-54.15	-57.875		-51.0844	-52.9906		-57.2125
																																								-60.9719	-61.95		-54.2656	-57.925		-51.1	-52.9969		-57.2656
																																								-60.9719	-61.95		-54.2656	-57.925		-51.1	-52.9969		-57.2656
																																								-60.975	-61.8312		-54.375	-57.975		-51.0625	-52.9062		-57.2188
																																								-60.975	-61.8312		-54.375	-57.975		-51.0625	-52.9062		-57.2188
																																								-60.9312	-61.85		-54.325	-58.125		-51.0719	-52.9094		-57.1688
																																								-60.9312	-61.85		-54.325	-58.125		-51.0719	-52.9094		-57.1688
																																								-60.9375	-61.9406		-54.1156	-58.1625		-51.0438	-52.8594		-57.1625
																																								-60.9375	-61.9406		-54.1156	-58.1625		-51.0438	-52.8594		-57.1625
																																								-61.025	-62.0062		-54.075	-57.975		-51.0594	-52.8187		-57.15
																																								-61.025	-62.0062		-54.075	-57.975		-51.0594	-52.8187		-57.15
																																								-61.0469	-62.0156		-54.3812	-58.0969		-51.0687	-52.7906		-57.1656
																																								-61.0469	-62.0156		-54.3812	-58.0969		-51.0687	-52.7906		-57.1656
																																								-61.0375	-62.0625		-54.2562	-58.1781		-51.1344	-52.9219		-57.1094
																																								-61.0375	-62.0625		-54.2562	-58.1781		-51.1344	-52.9219		-57.1094
																																								-60.9656	-61.8219		-54.2562	-58.1156		-51.1125	-52.8438		-57.1875
																																								-60.9656	-61.8219		-54.2562	-58.1156		-51.1125	-52.8438		-57.1875
																																								-61	-61.7406		-54.3594	-58.1406		-50.9188	-52.6937		-57.2594
																																								-61	-61.7406		-54.3594	-58.1406		-50.9188	-52.6937		-57.2594
																																								-61.1562	-61.9125		-54.4656	-58.0687		-50.9562	-52.5		-57.275
																																								-61.1562	-61.9125		-54.4656	-58.0687		-50.9562	-52.5		-57.275
																																								-61.2219	-61.9281		-54.5438	-57.9875		-50.8	-52.8719		-57.1969
																																								-61.2219	-61.9281		-54.5438	-57.9875		-50.8	-52.8719		-57.1969
																																								-61.2219	-61.8594		-54.5281	-57.9719		-50.85	-52.8		-57.1219
																																								-61.2219	-61.8594		-54.5281	-57.9719		-50.85	-52.8		-57.1219
																																								-61.0562	-62.0344		-54.4937	-57.8625		-50.9125	-52.5594		-57.0812
																																								-61.0562	-62.0344		-54.4937	-57.8625		-50.9125	-52.5594		-57.0812
																																								-61.1031	-62.0469		-54.3969	-57.9688		-50.9375	-52.5812		-57.1344
																																								-61.1031	-62.0469		-54.3969	-57.9688		-50.9375	-52.5812		-57.1344
																																								-61.3937	-61.925		-54.45	-57.9125		-50.8344	-52.65		-57.0844
																																								-61.3937	-61.925		-54.45	-57.9125		-50.8344	-52.65		-57.0844
																																								-61.1937	-61.8406		-54.5062	-57.875		-50.7875	-52.5625		-57.2219
																																								-61.1937	-61.8406		-54.5062	-57.875		-50.7875	-52.5625		-57.2219
																																								-61.025	-62		-54.5094	-58.0125		-50.8	-52.8844		-57.2188
																																								-61.025	-62		-54.5094	-58.0125		-50.8	-52.8844		-57.2188
																																								-60.9906	-61.95		-54.7687	-57.95		-50.95	-52.9469		-57.0031
																																								-60.9906	-61.95		-54.7687	-57.95		-50.95	-52.9469		-57.0031
																																								-61.1031	-61.85		-54.6187	-57.8844		-51.0719	-52.7		-57.0031
																																								-61.1031	-61.85		-54.6187	-57.8844		-51.0719	-52.7		-57.0031
																																								-61.1125	-61.9594		-54.5312	-57.9813		-50.8656	-52.5062		-57.075
																																								-61.1125	-61.9594		-54.5312	-57.9813		-50.8656	-52.5062		-57.075
																																								-61.0187	-61.8969		-54.65	-58.0312		-50.85	-52.6469		-57.025
																																								-61.0187	-61.8969		-54.65	-58.0312		-50.85	-52.6469		-57.025
																																								-60.9844	-61.7		-54.6719	-57.9937		-50.6969	-52.7188		-57.1281
																																								-60.9844	-61.7		-54.6719	-57.9937		-50.6969	-52.7188		-57.1281
																																								-60.9719	-61.7938		-54.7	-57.8531		-50.7938	-52.6187		-57.2031
																																								-60.9719	-61.7938		-54.7	-57.8531		-50.7938	-52.6187		-57.2031
																																								-61.0281	-61.8438		-54.7719	-57.7562		-50.6969	-52.6812		-57.125
																																								-61.0281	-61.8438		-54.7719	-57.7562		-50.6969	-52.6812		-57.125
																																								-61.025	-61.9344		-54.75	-57.7687		-50.7844	-52.5375		-57.2
																																								-61.025	-61.9344		-54.75	-57.7687		-50.7844	-52.5375		-57.2
																																								-61.0812	-61.9875		-54.7094	-57.8969		-50.6781	-52.6187		-57.1063
																																								-61.0812	-61.9875		-54.7094	-57.8969		-50.6781	-52.6187		-57.1063
																																								-61.1281	-62.0281		-54.7	-57.9531		-50.775	-52.6406		-56.9813
																																								-61.1281	-62.0281		-54.7	-57.9531		-50.775	-52.6406		-56.9813
																																								-61.3	-62.1688		-54.8375	-57.8844		-50.7844	-52.4875		-56.95
																																								-61.3	-62.1688		-54.8375	-57.8844		-50.7844	-52.4875		-56.95
																																								-61.3438	-62.0125		-54.8469	-57.8031		-50.775	-52.3312		-56.9844
																																								-61.3438	-62.0125		-54.8469	-57.8031		-50.775	-52.3312		-56.9844
																																								-61.1781	-62.0656		-54.925	-57.7188		-50.7344	-52.375		-57.0781
																																								-61.1781	-62.0656		-54.925	-57.7188		-50.7344	-52.375		-57.0781
																																								-61.2094	-62.225		-54.9594	-57.7188		-50.5187	-52.55		-57.0625
																																								-61.2094	-62.225		-54.9594	-57.7188		-50.5187	-52.55		-57.0625
																																								-61.1125	-62.0812		-55.0281	-57.65		-50.5812	-52.6031		-57.0781
																																								-61.1125	-62.0812		-55.0281	-57.65		-50.5812	-52.6031		-57.0781
																																								-61.0812	-62.0062		-55.0875	-57.7781		-50.5656	-52.6531		-57.1406
																																								-61.0812	-62.0062		-55.0875	-57.7781		-50.5656	-52.6531		-57.1406
																																								-61.2375	-62.1312		-54.9312	-57.65		-50.5344	-52.5156		-57.0375
																																								-61.2375	-62.1312		-54.9312	-57.65		-50.5344	-52.5156		-57.0375
																																								-61.1906	-62		-54.975	-57.75		-50.5187	-52.6625		-57.15
																																								-61.1906	-62		-54.975	-57.75		-50.5187	-52.6625		-57.15
																																								-61.2094	-62.0719		-55.2	-57.8812		-50.5062	-52.65		-56.9781
																																								-61.2094	-62.0719		-55.2	-57.8812		-50.5062	-52.65		-56.9781
																																								-61.1625	-61.9312		-55.2	-57.9375		-50.5438	-52.6437		-56.9594
																																								-61.1625	-61.9312		-55.2	-57.9375		-50.5438	-52.6437		-56.9594
																																								-61.2812	-61.8594		-55.0094	-57.8312		-50.475	-52.2594		-56.9
																																								-61.2812	-61.8594		-55.0094	-57.8312		-50.475	-52.2594		-56.9
																																								-61.2062	-62.0656		-54.9312	-57.9562		-50.5656	-52.2594		-57.0062
																																								-61.2062	-62.0656		-54.9312	-57.9562		-50.5656	-52.2594		-57.0062
																																								-61.2	-61.9125		-55	-57.95		-50.5312	-52.5562		-56.9813
																																								-61.2	-61.9125		-55	-57.95		-50.5312	-52.5562		-56.9813
																																								-61.1125	-61.9125		-55.0438	-57.95		-50.6	-52.5406		-57.0375
																																								-61.1125	-61.9125		-55.0438	-57.95		-50.6	-52.5406		-57.0375
																																								-61.3594	-61.9531		-55.0687	-57.9562		-50.5156	-52.3656		-57.1063
																																								-61.3594	-61.9531		-55.0687	-57.9562		-50.5156	-52.3656		-57.1063
																																								-61.4344	-61.9844		-55.2125	-57.8156		-50.4219	-52.5125		-57.0312
																																								-61.4344	-61.9844		-55.2125	-57.8156		-50.4219	-52.5125		-57.0312
																																								-61.4156	-62.05		-55.2281	-57.6969		-50.3656	-52.55		-57.0219
																																								-61.4156	-62.05		-55.2281	-57.6969		-50.3656	-52.55		-57.0219
																																								-61.3312	-62.1281		-55.0812	-57.8		-50.4188	-52.3531		-57.0312
																																								-61.3312	-62.1281		-55.0812	-57.8		-50.4188	-52.3531		-57.0312
																																								-61.2031	-61.9781		-55.0156	-57.8719		-50.4781	-52.4406		-57.0438
																																								-61.2031	-61.9781		-55.0156	-57.8719		-50.4781	-52.4406		-57.0438
																																								-49.2	-53.6281		-43.0656	-49.525		-34.1063	-37.1688		-57.0562
																																								-49.2	-53.6281		-43.0656	-49.525		-34.1063	-37.1688		-57.0562
																																								-49.4156	-50.8906		-43.2156	-46.7313		-37.8375	-37.2938		-68.7906
																																								-49.4156	-50.8906		-43.2156	-46.7313		-37.8375	-37.2938		-68.7906
																																								-58.1094	-57.9562		-52.0906	-53.8906		-45.4625	-48.575		-68.5062
																																								-58.1094	-57.9562		-52.0906	-53.8906		-45.4625	-48.575		-68.5062
																																								-61.5187	-61.975		-55.5125	-58.0906		-47.5969	-52.9406		-63.375
																																								-61.5187	-61.975		-55.5125	-58.0906		-47.5969	-52.9406		-63.375
																																								-63.1437	-64.075		-57.2969	-60.3625		-50.1562	-54.325		-59.0906
																																								-63.1437	-64.075		-57.2969	-60.3625		-50.1562	-54.325		-59.0906
																																								-78	-75.475		-72.25	-71.8625		-70.4906	-72.9125		-46.5719
																																								-78	-75.475		-72.25	-71.8625		-70.4906	-72.9125		-46.5719
																																								-75.7281	-75.1156		-69.9594	-71.5469		-65.6813	-69.8		-39.2375
																																								-75.7281	-75.1156		-69.9594	-71.5469		-65.6813	-69.8		-39.2375
																																								-66.075	-67.6188		-60.2156	-64.0219		-55.7344	-57.1437		-39.2156
																																								-66.075	-67.6188		-60.2156	-64.0219		-55.7344	-57.1437		-39.2156
																																								-61.1875	-62.8344		-55.6406	-59.15		-51.5562	-51.5781		-43.0875
																																								-61.1875	-62.8344		-55.6406	-59.15		-51.5562	-51.5781		-43.0875
																																								-59.9562	-60.6969		-54.1344	-57.0219		-49.7844	-50.5406		-47.0719
																																								-59.9562	-60.6969		-54.1344	-57.0219		-49.7844	-50.5406		-47.0719
																																								-53.0062	-55.0687		-46.8937	-51.0938		-39.6937	-41.4375		-53.2344
																																								-53.0062	-55.0687		-46.8937	-51.0938		-39.6937	-41.4375		-53.2344
																																								-55.9344	-56.7094		-49.5344	-52.6781		-44.0938	-45.0687		-57.2094
																																								-55.9344	-56.7094		-49.5344	-52.6781		-44.0938	-45.0687		-57.2094
																																								-60.4031	-60.1875		-54.2375	-56.1656		-49.1312	-51.5062		-57.7219
																																								-60.4031	-60.1875		-54.2375	-56.1656		-49.1312	-51.5062		-57.7219
																																								-61.8156	-61.7656		-55.8312	-57.9813		-50.6937	-53.0406		-57.5938
																																								-61.8156	-61.7656		-55.8312	-57.9813		-50.6937	-53.0406		-57.5938
																																								-61.9156	-62.1		-55.925	-58.4031		-50.95	-52.8906		-57.375
																																								-61.9156	-62.1		-55.925	-58.4031		-50.95	-52.8906		-57.375
																																								-61.7719	-62.2625		-55.825	-58.3469		-50.8875	-52.5156		-57.2125
																																								-61.7719	-62.2625		-55.825	-58.3469		-50.8875	-52.5156		-57.2125
																																								-61.6125	-62.2156		-55.6937	-58.3344		-50.6844	-52.6562		-57.1437
																																								-61.6125	-62.2156		-55.6937	-58.3344		-50.6844	-52.6562		-57.1437
																																								-61.7031	-62.1		-55.8094	-58.3906		-50.75	-52.6063		-56.9156
																																								-61.7031	-62.1		-55.8094	-58.3906		-50.75	-52.6063		-56.9156
																																								-61.7094	-62.2687		-55.8719	-58.2687		-50.6375	-52.6688		-56.8406
																																								-61.7094	-62.2687		-55.8719	-58.2687		-50.6375	-52.6688		-56.8406
																																								-61.6531	-62.3531		-55.7562	-58.2469		-50.575	-52.6094		-56.7719
																																								-61.6531	-62.3531		-55.7562	-58.2469		-50.575	-52.6094		-56.7719
																																								-61.6156	-62.3312		-55.65	-58.1969		-50.45	-52.5562		-56.8312
																																								-61.6156	-62.3312		-55.65	-58.1969		-50.45	-52.5562		-56.8312
																																								-61.6	-62.1906		-55.7219	-58.2188		-50.45	-52.5219		-56.8969
																																								-61.6	-62.1906		-55.7219	-58.2188		-50.45	-52.5219		-56.8969
																																								-61.6437	-62.2125		-55.4625	-58.3219		-50.3281	-52.5531		-56.8875
																																								-61.6437	-62.2125		-55.4625	-58.3219		-50.3281	-52.5531		-56.8875
																																								-61.675	-62.2875		-55.4406	-58.2531		-50.2906	-52.6031		-56.9094
																																								-61.675	-62.2875		-55.4406	-58.2531		-50.2906	-52.6031		-56.9094
																																								-61.7031	-62.2281		-55.5656	-58.275		-50.35	-52.4156		-56.9406
																																								-61.7031	-62.2281		-55.5656	-58.275		-50.35	-52.4156		-56.9406
																																								-61.5562	-62.1656		-55.6844	-58.175		-50.3969	-52.1156		-56.7437
																																								-61.5562	-62.1656		-55.6844	-58.175		-50.3969	-52.1156		-56.7437
																																								-61.5969	-62.1844		-55.8563	-58.2812		-50.25	-52.3469		-56.7875
																																								-61.5969	-62.1844		-55.8563	-58.2812		-50.25	-52.3469		-56.7875
																																								-61.6125	-62.2844		-55.9031	-58.4281		-50.2719	-52.525		-56.9125
																																								-61.6125	-62.2844		-55.9031	-58.4281		-50.2719	-52.525		-56.9125
																																								-61.7625	-62.1469		-55.9531	-58.5406		-50.2062	-52.4062		-56.9937
																																								-61.7625	-62.1469		-55.9531	-58.5406		-50.2062	-52.4062		-56.9937
																																								-61.675	-62.1656		-55.7656	-58.6469		-50.2188	-52.2594		-56.8594
																																								-61.675	-62.1656		-55.7656	-58.6469		-50.2188	-52.2594		-56.8594
																																								-61.75	-62.1312		-55.8719	-58.6031		-50.25	-52.45		-56.9469
																																								-61.75	-62.1312		-55.8719	-58.6031		-50.25	-52.45		-56.9469
																																								-61.6125	-62.2687		-55.9281	-58.4188		-50.3094	-52.3312		-57.0312
																																								-61.6125	-62.2687		-55.9281	-58.4188		-50.3094	-52.3312		-57.0312
																																								-61.6156	-62.2406		-55.8812	-58.3312		-50.1375	-52.2812		-56.9562
																																								-61.6156	-62.2406		-55.8812	-58.3312		-50.1375	-52.2812		-56.9562
																																								-61.6125	-62.2594		-55.7188	-58.3187		-50.15	-52.5062		-56.9219
																																								-61.6125	-62.2594		-55.7188	-58.3187		-50.15	-52.5062		-56.9219
																																								-61.6875	-62.3344		-55.7031	-58.425		-50.1656	-52.3375		-57.0687
																																								-61.6875	-62.3344		-55.7031	-58.425		-50.1656	-52.3375		-57.0687
																																								-61.5562	-62.4		-55.9594	-58.4281		-50.1688	-52.3625		-57.1688
																																								-61.5562	-62.4		-55.9594	-58.4281		-50.1688	-52.3625		-57.1688
																																								-61.5	-62.3187		-55.9312	-58.2812		-50.3	-52.5438		-57.1156
																																								-61.5	-62.3187		-55.9312	-58.2812		-50.3	-52.5438		-57.1156
																																								-61.625	-62.2281		-55.9219	-58.3937		-50.1562	-52.4437		-57.1437
																																								-61.625	-62.2281		-55.9219	-58.3937		-50.1562	-52.4437		-57.1437
																																								-61.4906	-62.1781		-55.9906	-58.55		-50.15	-52.2719		-57.0187
																																								-61.4906	-62.1781		-55.9906	-58.55		-50.15	-52.2719		-57.0187
																																								-61.5906	-62.2031		-55.8969	-58.5781		-50.2	-52.4594		-57.0844
																																								-61.5906	-62.2031		-55.8969	-58.5781		-50.2	-52.4594		-57.0844
																																								-61.75	-62.2375		-55.8687	-58.3781		-50.2406	-52.5		-57.0812
																																								-61.75	-62.2375		-55.8687	-58.3781		-50.2406	-52.5		-57.0812
																																								-61.7812	-62.1937		-55.8563	-58.35		-50.1469	-52.3781		-57.0094
																																								-61.7812	-62.1937		-55.8563	-58.35		-50.1469	-52.3781		-57.0094
																																								-61.7437	-62.3937		-55.7875	-58.4		-50.0781	-52.3531		-57.0469
																																								-61.7437	-62.3937		-55.7875	-58.4		-50.0781	-52.3531		-57.0469
																																								-61.5906	-62.225		-55.9562	-58.5562		-50.0687	-52.2375		-57.1125
																																								-61.5906	-62.225		-55.9562	-58.5562		-50.0687	-52.2375		-57.1125
																																								-61.375	-62.1031		-56.1	-58.5031		-50.1156	-52.2656		-57.0719
																																								-61.375	-62.1031		-56.1	-58.5031		-50.1156	-52.2656		-57.0719
																																								-61.4312	-62.1781		-56.0219	-58.5469		-50.1156	-52.3563		-57.0312
																																								-61.4312	-62.1781		-56.0219	-58.5469		-50.1156	-52.3563		-57.0312
																																								-61.7469	-62.3438		-55.8438	-58.4188		-50.1562	-52.4437		-57.0719
																																								-61.7469	-62.3438		-55.8438	-58.4188		-50.1562	-52.4437		-57.0719
																																								-61.7313	-62.375		-56.125	-58.3625		-50.1	-52.3		-57.2
																																								-61.7313	-62.375		-56.125	-58.3625		-50.1	-52.3		-57.2
																																								-61.6344	-62.3844		-56.1	-58.45		-50.0562	-52.275		-57.0656
																																								-61.6344	-62.3844		-56.1	-58.45		-50.0562	-52.275		-57.0656
																																								-61.65	-62.2906		-55.9188	-58.4781		-49.7938	-52.2469		-57.2469
																																								-61.65	-62.2906		-55.9188	-58.4781		-49.7938	-52.2469		-57.2469
																																								-61.6156	-62.1656		-55.9688	-58.45		-49.8281	-52.2344		-57.1812
																																								-61.6156	-62.1656		-55.9688	-58.45		-49.8281	-52.2344		-57.1812
																																								-61.5438	-62.175		-56.0687	-58.6		-49.7531	-52.2562		-57.1469
																																								-61.5438	-62.175		-56.0687	-58.6		-49.7531	-52.2562		-57.1469
																																								-61.6	-62.2188		-55.95	-58.525		-49.7188	-52.2906		-57.0844
																																								-61.6	-62.2188		-55.95	-58.525		-49.7188	-52.2906		-57.0844
																																								-61.5219	-62.2875		-56.0406	-58.2969		-49.7844	-52.2406		-57.025
																																								-61.5219	-62.2875		-56.0406	-58.2969		-49.7844	-52.2406		-57.025
																																								-61.6844	-62.3969		-56.2	-58.4062		-49.9062	-52.2437		-57.0062
																																								-61.6844	-62.3969		-56.2	-58.4062		-49.9062	-52.2437		-57.0062
																																								-61.5844	-62.2812		-56.125	-58.4437		-49.9125	-52.1031		-57.075
																																								-61.5844	-62.2812		-56.125	-58.4437		-49.9125	-52.1031		-57.075
																																								-61.5406	-62.025		-56.1781	-58.5031		-49.7938	-52.2906		-57.15
																																								-61.5406	-62.025		-56.1781	-58.5031		-49.7938	-52.2906		-57.15
																																								-61.6688	-62		-56.15	-58.6594		-49.8312	-52.4781		-57.1
																																								-61.6688	-62		-56.15	-58.6594		-49.8312	-52.4781		-57.1
																																								-61.5344	-61.9719		-56.1781	-58.5906		-49.8469	-52.2125		-57.0969
																																								-61.5344	-61.9719		-56.1781	-58.5906		-49.8469	-52.2125		-57.0969
																																								-61.0562	-62.0281		-56.2656	-58.5719		-49.8531	-52.0562		-57.1094
																																								-61.0562	-62.0281		-56.2656	-58.5719		-49.8531	-52.0562		-57.1094
																																								-60.8344	-62.1031		-56.1281	-58.5656		-49.7281	-51.9094		-57.1344
																																								-60.8344	-62.1031		-56.1281	-58.5656		-49.7281	-51.9094		-57.1344
																																								-60.575	-62.1969		-56.0938	-58.3062		-49.7812	-52.0438		-57.0469
																																								-60.575	-62.1969		-56.0938	-58.3062		-49.7812	-52.0438		-57.0469
																																								-60.2812	-62.1656		-56.0094	-58.3625		-49.6	-52.2344		-57.0375
																																								-60.2812	-62.1656		-56.0094	-58.3625		-49.6	-52.2344		-57.0375
																																								-59.9813	-62.2406		-55.9062	-58.2094		-49.7094	-52.3156		-57.0562
																																								-59.9813	-62.2406		-55.9062	-58.2094		-49.7094	-52.3156		-57.0562
																																								-59.8781	-62.1375		-55.6531	-58.2188		-49.6781	-52.0438		-56.9
																																								-59.8781	-62.1375		-55.6531	-58.2188		-49.6781	-52.0438		-56.9
																																								-59.7687	-62.0125		-55.5125	-58.2562		-49.4031	-51.9344		-56.8094
																																								-59.7687	-62.0125		-55.5125	-58.2562		-49.4031	-51.9344		-56.8094
																																								-59.5344	-61.7875		-55.4625	-58.3281		-49.5062	-51.7219		-56.6781
																																								-59.5344	-61.7875		-55.4625	-58.3281		-49.5062	-51.7219		-56.6781
																																								-59.0687	-61.7531		-55.3937	-58.3969		-49.6781	-51.8312		-56.7906
																																								-59.0687	-61.7531		-55.3937	-58.3969		-49.6781	-51.8312		-56.7906
																																								-58.9688	-61.7094		-55.4594	-58.4062		-49.575	-51.7969		-56.8187
																																								-58.9688	-61.7094		-55.4594	-58.4062		-49.575	-51.7969		-56.8187
																																								-58.8937	-61.7562		-55.3438	-58.25		-49.5469	-51.8812		-56.7656
																																								-58.8937	-61.7562		-55.3438	-58.25		-49.5469	-51.8812		-56.7656
																																								-58.9094	-61.7406		-55.3344	-58.2875		-49.475	-51.7625		-56.6969
																																								-58.9094	-61.7406		-55.3344	-58.2875		-49.475	-51.7625		-56.6969
																																								-58.65	-61.8		-55.25	-58.0906		-49.2719	-51.7781		-56.5406
																																								-58.65	-61.8		-55.25	-58.0906		-49.2719	-51.7781		-56.5406
																																								-58.4188	-61.6688		-55.0187	-58.1		-49.2812	-51.7437		-56.5719
																																								-58.4188	-61.6688		-55.0187	-58.1		-49.2812	-51.7437		-56.5719
																																								-58.2	-61.5625		-55.1719	-57.95		-49.2313	-51.7531		-56.5156
																																								-58.2	-61.5625		-55.1719	-57.95		-49.2313	-51.7531		-56.5156
																																								-58.1531	-61.775		-55.1312	-57.85		-49.1844	-51.575		-56.4625
																																								-58.1531	-61.775		-55.1312	-57.85		-49.1844	-51.575		-56.4625
																																								-58.2406	-61.775		-55.0438	-57.9094		-49.125	-51.5187		-56.4
																																								-58.2406	-61.775		-55.0438	-57.9094		-49.125	-51.5187		-56.4
																																								-58.1094	-61.6625		-55.1406	-57.8219		-48.9719	-51.4		-56.2875
																																								-58.1094	-61.6625		-55.1406	-57.8219		-48.9719	-51.4		-56.2875
																																								-57.9188	-61.475		-55.1187	-57.85		-48.925	-51.5031		-56.3438
																																								-57.9188	-61.475		-55.1187	-57.85		-48.925	-51.5031		-56.3438
																																								-57.8219	-61.3969		-55.0781	-57.8062		-48.8469	-51.4844		-56.2219
																																								-57.8219	-61.3969		-55.0781	-57.8062		-48.8469	-51.4844		-56.2219
																																								-57.7906	-61.35		-55.0531	-57.7812		-48.7719	-51.1688		-56.2938
																																								-57.7906	-61.35		-55.0531	-57.7812		-48.7719	-51.1688		-56.2938
																																								-57.5781	-61.3406		-54.9719	-57.7281		-48.7344	-51.3438		-56.0969
																																								-57.5781	-61.3406		-54.9719	-57.7281		-48.7344	-51.3438		-56.0969
																																								-57.6219	-61.2844		-54.9937	-57.7313		-48.7437	-51.2594		-55.9
																																								-57.6219	-61.2844		-54.9937	-57.7313		-48.7437	-51.2594		-55.9
																																								-57.4625	-61.1937		-54.8781	-57.6844		-48.6625	-51.0156		-55.95
																																								-57.4625	-61.1937		-54.8781	-57.6844		-48.6625	-51.0156		-55.95
																																								-57.2656	-61.1969		-54.75	-57.6219		-48.6656	-50.9156		-55.9875
																																								-57.2656	-61.1969		-54.75	-57.6219		-48.6656	-50.9156		-55.9875
																																								-57.1562	-61.3062		-54.7188	-57.8		-48.3781	-50.9937		-55.7625
																																								-57.1562	-61.3062		-54.7188	-57.8		-48.3781	-50.9937		-55.7625
																																								-57.1156	-61.35		-54.7437	-57.7781		-48.2594	-50.9406		-55.6812
																																								-57.1156	-61.35		-54.7437	-57.7781		-48.2594	-50.9406		-55.6812
																																								-57.0781	-61.325		-54.5375	-57.8031		-48.25	-50.9719		-55.7469
																																								-57.0781	-61.325		-54.5375	-57.8031		-48.25	-50.9719		-55.7469
																																								-56.9625	-61.1562		-54.5687	-57.5625		-48.1312	-50.9875		-55.4719
																																								-56.9625	-61.1562		-54.5687	-57.5625		-48.1312	-50.9875		-55.4719
																																								-56.9219	-61.0781		-54.4562	-57.3625		-47.9875	-50.7687		-55.45
																																								-56.9219	-61.0781		-54.4562	-57.3625		-47.9875	-50.7687		-55.45
																																								-56.8375	-61.0125		-54.3438	-57.25		-47.8781	-50.5438		-55.3687
																																								-56.8375	-61.0125		-54.3438	-57.25		-47.8781	-50.5438		-55.3687
																																								-56.9781	-60.9312		-54.4344	-57.2594		-47.85	-50.625		-55.2437
																																								-56.9781	-60.9312		-54.4344	-57.2594		-47.85	-50.625		-55.2437
																																								-57	-60.8469		-54.3875	-57.1125		-47.8719	-50.3844		-55.0906
																																								-57	-60.8469		-54.3875	-57.1125		-47.8719	-50.3844		-55.0906
																																								-56.7344	-60.6719		-54.3187	-57.3438		-47.75	-50.2094		-54.8406
																																								-56.7344	-60.6719		-54.3187	-57.3438		-47.75	-50.2094		-54.8406
																																								-56.5438	-60.75		-54.3	-57.3094		-47.6375	-50.375		-54.7781
																																								-56.5438	-60.75		-54.3	-57.3094		-47.6375	-50.375		-54.7781
																																								-56.6437	-60.5406		-54.2219	-57.1625		-47.5094	-50.0469		-54.9
																																								-56.6437	-60.5406		-54.2219	-57.1625		-47.5094	-50.0469		-54.9
																																								-56.675	-60.4625		-54.3062	-57.1		-47.425	-50.175		-54.6312
																																								-56.675	-60.4625		-54.3062	-57.1		-47.425	-50.175		-54.6312
																																								-56.65	-60.475		-54.3438	-56.8969		-47.2594	-50.1063		-54.5594
																																								-56.65	-60.475		-54.3438	-56.8969		-47.2594	-50.1063		-54.5594
																																								-56.6375	-60.4125		-54.3	-56.9031		-47.1469	-50.1		-54.4469
																																								-56.6375	-60.4125		-54.3	-56.9031		-47.1469	-50.1		-54.4469
																																								-56.6031	-60.25		-54.0812	-57.0375		-47.1094	-49.9562		-54.1656
																																								-56.6031	-60.25		-54.0812	-57.0375		-47.1094	-49.9562		-54.1656
																																								-56.4281	-60.2281		-54.0469	-56.9906		-47.1812	-49.9875		-54.2375
																																								-56.4281	-60.2281		-54.0469	-56.9906		-47.1812	-49.9875		-54.2375
																																								-56.5438	-60.1094		-54.0594	-56.9719		-47.0406	-49.8531		-54.1312
																																								-56.5438	-60.1094		-54.0594	-56.9719		-47.0406	-49.8531		-54.1312
																																								-56.5094	-60.0781		-54.0594	-56.9188		-46.9062	-49.8812		-53.8969
																																								-56.5094	-60.0781		-54.0594	-56.9188		-46.9062	-49.8812		-53.8969
																																								-56.4156	-60.15		-54.0062	-56.7687		-46.8531	-49.7125		-53.7938
																																								-56.4156	-60.15		-54.0062	-56.7687		-46.8531	-49.7125		-53.7938
																																								-56.3844	-60.0812		-53.9156	-56.7281		-46.7687	-49.7594		-53.75
																																								-56.3844	-60.0812		-53.9156	-56.7281		-46.7687	-49.7594		-53.75
																																								-56.2687	-59.8906		-53.825	-56.7		-46.6594	-49.6		-53.7
																																								-56.2687	-59.8906		-53.825	-56.7		-46.6594	-49.6		-53.7
																																								-56.2469	-59.8031		-53.8594	-56.6375		-46.5687	-49.3375		-53.5594
																																								-56.2469	-59.8031		-53.8594	-56.6375		-46.5687	-49.3375		-53.5594
																																								-55.9844	-59.7687		-53.9156	-56.4937		-46.5906	-49.4781		-53.6
																																								-55.9844	-59.7687		-53.9156	-56.4937		-46.5906	-49.4781		-53.6
																																								-55.9375	-59.8062		-53.9219	-56.3312		-46.4062	-49.4125		-53.3687
																																								-55.9375	-59.8062		-53.9219	-56.3312		-46.4062	-49.4125		-53.3687
																																								-55.8875	-59.7406		-53.8062	-56.2219		-46.1625	-49.3937		-53.25
																																								-55.8875	-59.7406		-53.8062	-56.2219		-46.1625	-49.3937		-53.25
																																								-55.8031	-59.5656		-53.5781	-56.2687		-45.9969	-49.4312		-53.1812
																																								-55.8031	-59.5656		-53.5781	-56.2687		-45.9969	-49.4312		-53.1812
																																								-55.7156	-59.4094		-53.4719	-56.3312		-45.9094	-49.4344		-53.1688
																																								-55.7156	-59.4094		-53.4719	-56.3312		-45.9094	-49.4344		-53.1688
																																								-55.5844	-59.3156		-53.6531	-56.2313		-45.9469	-49.1344		-53.1531
																																								-55.5844	-59.3156		-53.6531	-56.2313		-45.9469	-49.1344		-53.1531
																																								-55.2969	-59.1156		-53.6844	-56.0219		-45.9969	-49.1531		-52.9969
																																								-55.2969	-59.1156		-53.6844	-56.0219		-45.9969	-49.1531		-52.9969
																																								-55.1094	-59.2281		-53.6406	-55.9531		-45.8812	-49.0875		-52.7375
																																								-55.1094	-59.2281		-53.6406	-55.9531		-45.8812	-49.0875		-52.7375
																																								-55.2188	-59.0406		-53.5687	-55.9437		-45.7875	-48.8906		-52.7687
																																								-55.2188	-59.0406		-53.5687	-55.9437		-45.7875	-48.8906		-52.7687
																																								-55.1375	-58.9219		-53.5562	-56.0875		-45.7875	-48.775		-52.7469
																																								-55.1375	-58.9219		-53.5562	-56.0875		-45.7875	-48.775		-52.7469
																																								-54.9688	-58.9188		-53.5469	-56.1187		-45.7125	-48.9062		-52.5219
																																								-54.9688	-58.9188		-53.5469	-56.1187		-45.7125	-48.9062		-52.5219
																																								-54.9688	-58.8		-53.3937	-56.1437		-45.6594	-48.8719		-52.5375
																																								-54.9688	-58.8		-53.3937	-56.1437		-45.6594	-48.8719		-52.5375
																																								-54.8344	-58.7188		-53.3438	-56		-45.4	-48.6875		-52.4937
																																								-54.8344	-58.7188		-53.3438	-56		-45.4	-48.6875		-52.4937
																																								-54.7594	-58.6281		-53.2875	-55.7812		-45.4344	-48.8375		-52.3937
																																								-54.7594	-58.6281		-53.2875	-55.7812		-45.4344	-48.8375		-52.3937
																																								-54.7062	-58.5594		-53.2188	-55.7938		-45.2812	-48.9062		-52.2781
																																								-54.7062	-58.5594		-53.2188	-55.7938		-45.2812	-48.9062		-52.2781
																																								-54.5844	-58.4688		-53.3	-55.75		-45.1781	-48.8438		-52.2594
																																								-54.5844	-58.4688		-53.3	-55.75		-45.1781	-48.8438		-52.2594
																																								-54.4875	-58.5031		-53.25	-55.575		-45.1875	-48.5625		-52.1625
																																								-54.4875	-58.5031		-53.25	-55.575		-45.1875	-48.5625		-52.1625
																																								-54.4813	-58.3469		-53.2469	-55.5438		-45.1656	-48.475		-52.0562
																																								-54.4813	-58.3469		-53.2469	-55.5438		-45.1656	-48.475		-52.0562
																																								-54.5344	-58.225		-53.1	-55.4781		-45.1187	-48.4281		-52
																																								-54.5344	-58.225		-53.1	-55.4781		-45.1187	-48.4281		-52
																																								-54.4437	-58.1812		-53.1937	-55.4688		-44.8438	-48.375		-52.0062
																																								-54.4437	-58.1812		-53.1937	-55.4688		-44.8438	-48.375		-52.0062
																																								-54.3438	-58.25		-53.2781	-55.575		-44.7594	-48.3563		-51.8812
																																								-54.3438	-58.25		-53.2781	-55.575		-44.7594	-48.3563		-51.8812
																																								-54.3187	-58.2156		-53.2219	-55.4781		-44.8469	-48.4469		-51.7906
																																								-54.3187	-58.2156		-53.2219	-55.4781		-44.8469	-48.4469		-51.7906
																																								-54.3344	-57.7969		-53.2375	-55.4219		-44.9219	-48.325		-51.7812
																																								-54.3344	-57.7969		-53.2375	-55.4219		-44.9219	-48.325		-51.7812
																																								-54.0875	-57.6094		-53.0906	-55.2469		-44.8625	-48.4813		-51.5969
																																								-54.0875	-57.6094		-53.0906	-55.2469		-44.8625	-48.4813		-51.5969
																																								-54.1156	-57.5781		-53.2031	-55.2406		-44.6562	-48.3219		-51.5625
																																								-54.1156	-57.5781		-53.2031	-55.2406		-44.6562	-48.3219		-51.5625
																																								-54.1094	-57.5281		-53.0969	-55.3563		-44.6656	-48.2031		-51.7
																																								-54.1094	-57.5281		-53.0969	-55.3563		-44.6656	-48.2031		-51.7
																																								-54.1312	-57.5781		-53.0281	-55.0094		-44.7156	-48.0687		-51.6906
																																								-54.1312	-57.5781		-53.0281	-55.0094		-44.7156	-48.0687		-51.6906
																																								-54.1063	-57.6312		-53.2406	-54.8781		-44.7344	-48		-51.5219
																																								-54.1063	-57.6312		-53.2406	-54.8781		-44.7344	-48		-51.5219
																																								-53.9906	-57.3812		-53.05	-54.7781		-44.6937	-47.85		-51.3625
																																								-53.9906	-57.3812		-53.05	-54.7781		-44.6937	-47.85		-51.3625
																																								-53.9688	-57.1156		-52.9188	-54.6844		-44.55	-47.9188		-51.3187
																																								-53.9688	-57.1156		-52.9188	-54.6844		-44.55	-47.9188		-51.3187
																																								-53.8563	-57.1094		-53	-54.5531		-44.7625	-47.8594		-51.3875
																																								-53.8563	-57.1094		-53	-54.5531		-44.7625	-47.8594		-51.3875
																																								-53.7969	-57.0875		-53.0031	-54.6406		-44.6	-47.6906		-51.2406
																																								-53.7969	-57.0875		-53.0031	-54.6406		-44.6	-47.6906		-51.2406
																																								-53.5625	-57.0156		-52.9406	-54.6375		-44.5719	-47.825		-51.1969
																																								-53.5625	-57.0156		-52.9406	-54.6375		-44.5719	-47.825		-51.1969
																																								-53.5844	-56.9094		-52.8875	-54.525		-44.45	-47.8563		-51.0594
																																								-53.5844	-56.9094		-52.8875	-54.525		-44.45	-47.8563		-51.0594
																																								-53.7656	-56.8375		-52.8469	-54.4531		-44.5	-47.8469		-50.9312
																																								-53.7656	-56.8375		-52.8469	-54.4531		-44.5	-47.8469		-50.9312
																																								-53.7375	-56.8		-52.8438	-54.5156		-44.4	-47.8594		-50.9656
																																								-53.7375	-56.8		-52.8438	-54.5156		-44.4	-47.8594		-50.9656
																																								-53.5375	-56.8844		-52.7219	-54.5281		-44.3219	-47.8		-50.9
																																								-53.5375	-56.8844		-52.7219	-54.5281		-44.3219	-47.8		-50.9
																																								-53.4156	-56.8406		-52.5594	-54.6562		-44.2437	-47.775		-50.9688
																																								-53.4156	-56.8406		-52.5594	-54.6562		-44.2437	-47.775		-50.9688
																																								-53.525	-56.7		-52.6437	-54.4719		-44.2094	-47.6594		-50.8594
																																								-53.525	-56.7		-52.6437	-54.4719		-44.2094	-47.6594		-50.8594
																																								-53.6719	-56.4688		-52.7938	-54.4406		-44.2844	-47.5312		-50.9062
																																								-53.6719	-56.4688		-52.7938	-54.4406		-44.2844	-47.5312		-50.9062
																																								-53.6812	-56.35		-52.6469	-54.4875		-44.15	-47.7875		-50.7531
																																								-53.6812	-56.35		-52.6469	-54.4875		-44.15	-47.7875		-50.7531
																																								-53.5406	-56.3969		-52.5531	-54.4937		-44.1844	-47.6344		-50.6437
																																								-53.5406	-56.3969		-52.5531	-54.4937		-44.1844	-47.6344		-50.6437
																																								-53.6437	-56.4375		-52.5406	-54.6312		-44.2531	-47.4719		-50.5531
																																								-53.6437	-56.4375		-52.5406	-54.6312		-44.2531	-47.4719		-50.5531
																																								-53.6875	-56.5344		-52.6781	-54.6094		-43.9813	-47.5		-50.6437
																																								-53.6875	-56.5344		-52.6781	-54.6094		-43.9813	-47.5		-50.6437
																																								-53.5312	-56.35		-52.8094	-54.55		-43.9531	-47.5406		-50.5906
																																								-53.5312	-56.35		-52.8094	-54.55		-43.9531	-47.5406		-50.5906
																																								-53.3875	-56.0312		-52.8406	-54.3969		-44.2	-47.4937		-50.5938
																																								-53.3875	-56.0312		-52.8406	-54.3969		-44.2	-47.4937		-50.5938
																																								-53.4094	-55.9094		-52.7687	-54.325		-44.1406	-47.4		-50.4844
																																								-53.4094	-55.9094		-52.7687	-54.325		-44.1406	-47.4		-50.4844
																																								-53.3594	-55.95		-52.6937	-54.5031		-44.0406	-47.4156		-50.45
																																								-53.3594	-55.95		-52.6937	-54.5031		-44.0406	-47.4156		-50.45
																																								-53.4375	-56.1063		-52.6094	-54.5156		-43.8875	-47.3937		-50.325
																																								-53.4375	-56.1063		-52.6094	-54.5156		-43.8875	-47.3937		-50.325
																																								-53.3969	-56.0625		-52.5687	-54.3875		-44.0062	-47.3531		-50.2875
																																								-53.3969	-56.0625		-52.5687	-54.3875		-44.0062	-47.3531		-50.2875
																																								-53.35	-56.2156		-52.5938	-54.4031		-43.9062	-47.475		-50.3812
																																								-53.35	-56.2156		-52.5938	-54.4031		-43.9062	-47.475		-50.3812
																																								-53.3656	-56.1906		-52.5812	-54.4156		-43.8844	-47.65		-50.2875
																																								-53.3656	-56.1906		-52.5812	-54.4156		-43.8844	-47.65		-50.2875
																																								-53.4312	-56.0156		-52.6844	-54.4344		-43.8156	-47.4344		-50.2
																																								-53.4312	-56.0156		-52.6844	-54.4344		-43.8156	-47.4344		-50.2
																																								-53.475	-55.8312		-52.5469	-54.3312		-43.8812	-47.25		-50.3
																																								-53.475	-55.8312		-52.5469	-54.3312		-43.8812	-47.25		-50.3
																																								-53.45	-56.0094		-52.5281	-54.2062		-43.8469	-47.3906		-50.1
																																								-53.45	-56.0094		-52.5281	-54.2062		-43.8469	-47.3906		-50.1
																																								-53.3687	-55.8812		-52.4062	-54.2906		-43.7125	-47.3937		-50.2469
																																								-53.3687	-55.8812		-52.4062	-54.2906		-43.7125	-47.3937		-50.2469
																																								-53.3812	-55.7625		-52.65	-54.4094		-43.7594	-47.2062		-50.15
																																								-53.3812	-55.7625		-52.65	-54.4094		-43.7594	-47.2062		-50.15
																																								-53.3812	-55.9406		-52.6562	-54.4688		-43.8	-46.85		-50.1969
																																								-53.3812	-55.9406		-52.6562	-54.4688		-43.8	-46.85		-50.1969
																																								-53.2938	-55.8375		-52.5938	-54.5406		-43.7531	-47.1406		-50.0844
																																								-53.2938	-55.8375		-52.5938	-54.5406		-43.7531	-47.1406		-50.0844
																																								-53.4437	-55.8406		-52.6031	-54.2812		-43.6719	-47.2938		-50.0938
																																								-53.4437	-55.8406		-52.6031	-54.2812		-43.6719	-47.2938		-50.0938
																																								-53.5	-55.8219		-52.6281	-54.3781		-43.6219	-47.2313		-50.0625
																																								-53.5	-55.8219		-52.6281	-54.3781		-43.6219	-47.2313		-50.0625
																																								-53.4469	-55.7375		-52.5	-54.375		-43.6031	-47.2281		-49.9312
																																								-53.4469	-55.7375		-52.5	-54.375		-43.6031	-47.2281		-49.9312
																																								-53.5531	-55.5469		-52.5281	-54.2844		-43.575	-47.1125		-49.9
																																								-53.5531	-55.5469		-52.5281	-54.2844		-43.575	-47.1125		-49.9
																																								-53.5687	-55.5594		-52.5344	-54.25		-43.5312	-47.0812		-49.9
																																								-53.5687	-55.5594		-52.5344	-54.25		-43.5312	-47.0812		-49.9
																																								-53.6688	-55.65		-52.6187	-54.3		-43.5781	-47.0344		-50
																																								-53.6688	-55.65		-52.6187	-54.3		-43.5781	-47.0344		-50
																																								-53.5594	-55.6187		-52.6156	-54.4		-43.6375	-47.2719		-49.9875
																																								-53.5594	-55.6187		-52.6156	-54.4		-43.6375	-47.2719		-49.9875
																																								-53.4562	-55.6781		-52.5062	-54.3		-43.6	-47.2281		-50.0312
																																								-53.4562	-55.6781		-52.5062	-54.3		-43.6	-47.2281		-50.0312
																																								-53.4	-55.7		-52.55	-54.3375		-43.4719	-46.9156		-50.075
																																								-53.4	-55.7		-52.55	-54.3375		-43.4719	-46.9156		-50.075
																																								-53.4125	-55.5594		-52.6906	-54.4875		-43.6312	-47.0719		-50.1187
																																								-53.4125	-55.5594		-52.6906	-54.4875		-43.6312	-47.0719		-50.1187
																																								-53.6344	-55.5187		-52.7094	-54.6906		-43.6937	-47.075		-49.9813
																																								-53.6344	-55.5187		-52.7094	-54.6906		-43.6937	-47.075		-49.9813
																																								-53.5219	-55.6		-52.6094	-54.7313		-43.6063	-47.0875		-49.9469
																																								-53.5219	-55.6		-52.6094	-54.7313		-43.6063	-47.0875		-49.9469
																																								-53.7	-55.6375		-52.5625	-54.6		-43.6	-46.975		-49.9156
																																								-53.7	-55.6375		-52.5625	-54.6		-43.6	-46.975		-49.9156
																																								-53.85	-55.6		-52.4969	-54.4344		-43.475	-47.0312		-49.925
																																								-53.85	-55.6		-52.4969	-54.4344		-43.475	-47.0312		-49.925
																																								-53.55	-55.6531		-52.3281	-54.45		-43.4031	-46.95		-49.8844
																																								-53.55	-55.6531		-52.3281	-54.45		-43.4031	-46.95		-49.8844
																																								-53.6719	-55.6844		-52.2313	-54.4937		-43.3906	-47.0219		-49.8469
																																								-53.6719	-55.6844		-52.2313	-54.4937		-43.3906	-47.0219		-49.8469
																																								-53.6406	-55.6531		-52.0844	-54.5375		-43.4875	-46.875		-49.65
																																								-53.6406	-55.6531		-52.0844	-54.5375		-43.4875	-46.875		-49.65
																																								-53.8594	-55.7656		-51.9625	-54.6625		-43.4562	-46.9094		-49.7625
																																								-53.8594	-55.7656		-51.9625	-54.6625		-43.4562	-46.9094		-49.7625
																																								-53.6688	-55.7062		-51.925	-54.6594		-43.4	-46.9344		-49.7469
																																								-53.6688	-55.7062		-51.925	-54.6594		-43.4	-46.9344		-49.7469
																																								-53.6406	-55.7938		-51.7406	-54.8156		-43.3906	-46.7938		-49.8
																																								-53.6406	-55.7938		-51.7406	-54.8156		-43.3906	-46.7938		-49.8
																																								-53.65	-55.7344		-51.6344	-54.7219		-43.3906	-46.9094		-49.8719
																																								-53.65	-55.7344		-51.6344	-54.7219		-43.3906	-46.9094		-49.8719
																																								-53.5812	-55.7		-51.775	-54.6		-43.4375	-46.8937		-49.8
																																								-53.5812	-55.7		-51.775	-54.6		-43.4375	-46.8937		-49.8
																																								-53.5969	-55.3937		-51.4875	-54.55		-43.3625	-46.9156		-49.8062
																																								-53.5969	-55.3937		-51.4875	-54.55		-43.3625	-46.9156		-49.8062
																																								-53.5094	-55.4219		-51.4562	-54.6		-43.3438	-46.875		-49.8219
																																								-53.5094	-55.4219		-51.4562	-54.6		-43.3438	-46.875		-49.8219
																																								-53.6625	-55.5312		-51.625	-54.7188		-43.4	-46.8969		-49.8187
																																								-53.6625	-55.5312		-51.625	-54.7188		-43.4	-46.8969		-49.8187
																																								-53.7156	-55.5187		-51.4156	-54.7188		-43.2344	-46.85		-49.8156
																																								-53.7156	-55.5187		-51.4156	-54.7188		-43.2344	-46.85		-49.8156
																																								-53.6656	-55.7281		-51.3781	-54.6156		-43.1437	-46.775		-49.7875
																																								-53.6656	-55.7281		-51.3781	-54.6156		-43.1437	-46.775		-49.7875
																																								-53.5375	-55.7469		-51.4531	-54.5656		-43.2	-46.6469		-49.85
																																								-53.5375	-55.7469		-51.4531	-54.5656		-43.2	-46.6469		-49.85
																																								-53.4531	-55.5969		-51.3094	-54.5531		-43.2	-46.6219		-49.8594
																																								-53.4531	-55.5969		-51.3094	-54.5531		-43.2	-46.6219		-49.8594
																																								-53.4625	-55.5438		-51.4781	-54.6031		-43.2406	-46.5562		-49.825
																																								-53.4625	-55.5438		-51.4781	-54.6031		-43.2406	-46.5562		-49.825
																																								-53.6812	-55.5687		-51.575	-54.4656		-43.2687	-46.6187		-49.8844
																																								-53.6812	-55.5687		-51.575	-54.4656		-43.2687	-46.6187		-49.8844
																																								-53.6625	-55.6063		-51.4156	-54.6312		-43.2781	-46.6812		-49.7437
																																								-53.6625	-55.6063		-51.4156	-54.6312		-43.2781	-46.6812		-49.7437
																																								-53.6562	-55.7156		-51.3281	-54.7469		-43.2812	-46.8187		-49.8125
																																								-53.6562	-55.7156		-51.3281	-54.7469		-43.2812	-46.8187		-49.8125
																																								-53.7031	-55.7156		-51.1437	-54.7219		-43.2812	-46.7219		-49.9406
																																								-53.7031	-55.7156		-51.1437	-54.7219		-43.2812	-46.7219		-49.9406
																																								-53.6688	-55.725		-51.1969	-54.6656		-43.2281	-46.6594		-50.0062
																																								-53.6688	-55.725		-51.1969	-54.6656		-43.2281	-46.6594		-50.0062
																																								-53.7344	-55.6562		-51.3375	-54.6781		-43.2344	-46.6937		-49.8312
																																								-53.7344	-55.6562		-51.3375	-54.6781		-43.2344	-46.6937		-49.8312
																																								-53.7188	-55.625		-51.3563	-54.8312		-43.2	-46.5469		-49.7281
																																								-53.7188	-55.625		-51.3563	-54.8312		-43.2	-46.5469		-49.7281
																																								-53.7125	-55.4688		-51.2906	-54.8031		-43.2656	-46.575		-49.875
																																								-53.7125	-55.4688		-51.2906	-54.8031		-43.2656	-46.575		-49.875
																																								-53.6281	-55.4844		-51.3844	-54.8906		-43.25	-46.5875		-49.85
																																								-53.6281	-55.4844		-51.3844	-54.8906		-43.25	-46.5875		-49.85
																																								-53.7969	-55.5625		-51.3219	-54.9719		-43.1812	-46.5156		-49.8344
																																								-53.7969	-55.5625		-51.3219	-54.9719		-43.1812	-46.5156		-49.8344
																																								-53.7781	-55.6875		-51.125	-54.8125		-43	-46.4781		-49.7812
																																								-53.7781	-55.6875		-51.125	-54.8125		-43	-46.4781		-49.7812
																																								-53.6781	-55.6812		-51.2	-54.7281		-43.0812	-46.5094		-49.7562
																																								-53.6781	-55.6812		-51.2	-54.7281		-43.0812	-46.5094		-49.7562
																																								-53.6969	-55.5938		-51.3187	-54.7844		-43.05	-46.6125		-49.8219
																																								-53.6969	-55.5938		-51.3187	-54.7844		-43.05	-46.6125		-49.8219
																																								-53.6625	-55.5969		-51.5312	-54.925		-43.0875	-46.4875		-49.7125
																																								-53.6625	-55.5969		-51.5312	-54.925		-43.0875	-46.4875		-49.7125
																																								-53.65	-55.6656		-51.6063	-55.0344		-43.0219	-46.4188		-49.7687
																																								-53.65	-55.6656		-51.6063	-55.0344		-43.0219	-46.4188		-49.7687
																																								-53.7406	-55.6156		-51.475	-54.9469		-43.0156	-46.55		-49.7437
																																								-53.7406	-55.6156		-51.475	-54.9469		-43.0156	-46.55		-49.7437
																																								-53.7656	-55.6312		-51.5031	-54.8687		-43.0438	-46.5406		-49.6125
																																								-53.7656	-55.6312		-51.5031	-54.8687		-43.0438	-46.5406		-49.6125
																																								-53.8844	-55.5625		-51.4406	-55.0438		-43.0281	-46.5812		-49.7625
																																								-53.8844	-55.5625		-51.4406	-55.0438		-43.0281	-46.5812		-49.7625
																																								-53.7656	-55.6344		-51.4219	-54.8594		-43.0562	-46.6031		-49.8375
																																								-53.7656	-55.6344		-51.4219	-54.8594		-43.0562	-46.6031		-49.8375
																																								-53.6937	-55.7437		-51.4844	-54.7344		-42.8563	-46.6406		-49.9
																																								-53.6937	-55.7437		-51.4844	-54.7344		-42.8563	-46.6406		-49.9
																																								-53.7531	-55.7906		-51.6312	-54.875		-43.025	-46.4312		-49.8062
																																								-53.7531	-55.7906		-51.6312	-54.875		-43.025	-46.4312		-49.8062
																																								-53.8187	-55.7031		-51.6125	-55.0625		-43.0781	-46.3187		-49.7062
																																								-53.8187	-55.7031		-51.6125	-55.0625		-43.0781	-46.3187		-49.7062
																																								-53.7844	-55.5438		-51.6531	-55.1656		-42.9719	-46.3187		-49.7844
																																								-53.7844	-55.5438		-51.6531	-55.1656		-42.9719	-46.3187		-49.7844
																																								-53.8312	-55.5812		-51.6156	-55.0219		-43.05	-46.5375		-49.6969
																																								-53.8312	-55.5812		-51.6156	-55.0219		-43.05	-46.5375		-49.6969
																																								-53.8344	-55.5219		-51.65	-54.9688		-42.9156	-46.3844		-49.7375
																																								-53.8344	-55.5219		-51.65	-54.9688		-42.9156	-46.3844		-49.7375
																																								-53.9156	-55.6688		-51.475	-54.9594		-42.9344	-46.4094		-49.7219
																																								-53.9156	-55.6688		-51.475	-54.9594		-42.9344	-46.4094		-49.7219
																																								-53.8125	-55.7812		-51.8125	-54.8		-42.9062	-46.3594		-49.6875
																																								-53.8125	-55.7812		-51.8125	-54.8		-42.9062	-46.3594		-49.6875
																																								-53.8656	-55.8		-51.8531	-54.8937		-42.9	-46.3094		-49.6719
																																								-53.8656	-55.8		-51.8531	-54.8937		-42.9	-46.3094		-49.6719
																																								-53.9437	-55.9031		-51.6937	-54.8156		-42.8312	-46.3531		-49.7344
																																								-53.9437	-55.9031		-51.6937	-54.8156		-42.8312	-46.3531		-49.7344
																																								-53.9781	-55.8187		-51.7313	-54.7906		-42.825	-46.2469		-49.7469
																																								-53.9781	-55.8187		-51.7313	-54.7906		-42.825	-46.2469		-49.7469
																																								-53.8187	-56.0219		-51.75	-54.8469		-42.9125	-46.4281		-49.6719
																																								-53.8187	-56.0219		-51.75	-54.8469		-42.9125	-46.4281		-49.6719
																																								-53.825	-56.1		-51.8219	-54.9813		-42.8156	-46.3937		-49.6656
																																								-53.825	-56.1		-51.8219	-54.9813		-42.8156	-46.3937		-49.6656
																																								-53.8094	-55.8875		-51.7938	-55.0031		-42.75	-46.1875		-49.7313
																																								-53.8094	-55.8875		-51.7938	-55.0031		-42.75	-46.1875		-49.7313
																																								-53.825	-55.8375		-51.8906	-55.075		-42.8719	-46.3687		-49.825
																																								-53.825	-55.8375		-51.8906	-55.075		-42.8719	-46.3687		-49.825
																																								-53.8844	-55.875		-51.925	-55.025		-42.8656	-46.3781		-49.7656
																																								-53.8844	-55.875		-51.925	-55.025		-42.8656	-46.3781		-49.7656
																																								-54.0187	-55.8		-51.95	-55.0938		-42.8969	-46.4125		-49.7844
																																								-54.0187	-55.8		-51.95	-55.0938		-42.8969	-46.4125		-49.7844
																																								-54.0469	-55.9188		-51.9344	-55.05		-42.6312	-46.4594		-49.9469
																																								-54.0469	-55.9188		-51.9344	-55.05		-42.6312	-46.4594		-49.9469
																																								-54.1094	-55.7938		-51.9656	-55		-42.6562	-46.3469		-49.85
																																								-54.1094	-55.7938		-51.9656	-55		-42.6562	-46.3469		-49.85
																																								-54.1625	-55.8812		-51.9469	-55.0312		-42.7156	-46.35		-49.8156
																																								-54.1625	-55.8812		-51.9469	-55.0312		-42.7156	-46.35		-49.8156
																																								-53.9531	-55.8812		-51.9031	-54.9188		-42.7687	-46.3125		-49.9344
																																								-53.9531	-55.8812		-51.9031	-54.9188		-42.7687	-46.3125		-49.9344
																																								-54.0438	-55.9906		-52.0156	-54.7938		-42.7188	-46.2313		-49.8
																																								-54.0438	-55.9906		-52.0156	-54.7938		-42.7188	-46.2313		-49.8
																																								-54.2188	-55.9188		-52.1562	-54.8438		-42.8187	-46.3563		-49.625
																																								-54.2188	-55.9188		-52.1562	-54.8438		-42.8187	-46.3563		-49.625
																																								-54.2594	-55.9719		-52.0906	-54.875		-42.7313	-46.5656		-49.8281
																																								-54.2594	-55.9719		-52.0906	-54.875		-42.7313	-46.5656		-49.8281
																																								-54.15	-55.875		-52.025	-55.0344		-42.7844	-46.5625		-49.7687
																																								-54.15	-55.875		-52.025	-55.0344		-42.7844	-46.5625		-49.7687
																																								-54.2094	-55.7062		-52.2188	-55.0344		-42.6469	-46.4219		-49.6906
																																								-54.2094	-55.7062		-52.2188	-55.0344		-42.6469	-46.4219		-49.6906
																																								-54.1844	-55.6344		-52.2	-54.875		-42.75	-46.3312		-49.7781
																																								-54.1844	-55.6344		-52.2	-54.875		-42.75	-46.3312		-49.7781
																																								-54.1875	-55.6844		-52.3594	-54.8406		-42.675	-46.225		-49.7656
																																								-54.1875	-55.6844		-52.3594	-54.8406		-42.675	-46.225		-49.7656
																																								-54.1344	-55.7406		-52.4937	-54.7625		-42.6469	-46.4688		-49.6312
																																								-54.1344	-55.7406		-52.4937	-54.7625		-42.6469	-46.4688		-49.6312
																																								-54.2156	-55.7219		-52.4719	-54.6562		-42.7812	-46.5031		-49.7156
																																								-54.2156	-55.7219		-52.4719	-54.6562		-42.7812	-46.5031		-49.7156
																																								-54.1	-55.8469		-52.4344	-54.8625		-42.6625	-46.4375		-49.8969
																																								-54.1	-55.8469		-52.4344	-54.8625		-42.6625	-46.4375		-49.8969
																																								-54.2656	-55.9531		-52.5844	-54.8156		-42.7062	-46.2938		-49.85
																																								-54.2656	-55.9531		-52.5844	-54.8156		-42.7062	-46.2938		-49.85
																																								-54.1562	-55.9312		-52.5594	-54.7906		-42.4906	-46.2875		-49.7188
																																								-54.1562	-55.9312		-52.5594	-54.7906		-42.4906	-46.2875		-49.7188
																																								-54.15	-55.9188		-52.4437	-54.825		-42.5656	-46.15		-49.8375
																																								-54.15	-55.9188		-52.4437	-54.825		-42.5656	-46.15		-49.8375
																																								-54.075	-55.95		-52.3656	-54.6		-42.5656	-46.25		-49.775
																																								-54.075	-55.95		-52.3656	-54.6		-42.5656	-46.25		-49.775
																																								-54.25	-55.8438		-52.2656	-54.6375		-42.5969	-46.3406		-49.7719
																																								-54.25	-55.8438		-52.2656	-54.6375		-42.5969	-46.3406		-49.7719
																																								-42.2562	-47.25		-40.2469	-46.1625		-26.05	-31.0625		-50
																																								-42.2562	-47.25		-40.2469	-46.1625		-26.05	-31.0625		-50
																																								-42.6156	-44.4281		-40.5156	-43.2219		-29.9125	-31.0344		-61.7062
																																								-42.6156	-44.4281		-40.5156	-43.2219		-29.9125	-31.0344		-61.7062
																																								-51.3687	-51.9344		-49.2969	-50.5062		-37.5906	-42.4469		-61.4156
																																								-51.3687	-51.9344		-49.2969	-50.5062		-37.5906	-42.4469		-61.4156
																																								-54.6125	-56.0312		-52.8781	-54.7031		-40.0438	-46.65		-56.0531
																																								-54.6125	-56.0312		-52.8781	-54.7031		-40.0438	-46.65		-56.0531
																																								-56.3812	-58.15		-54.7188	-56.7219		-42.1094	-47.8656		-51.4625
																																								-56.3812	-58.15		-54.7188	-56.7219		-42.1094	-47.8656		-51.4625
																																								-71.1875	-69.5437		-69.6312	-68.3719		-62.5187	-66.725		-38.9937
																																								-71.1875	-69.5437		-69.6312	-68.3719		-62.5187	-66.725		-38.9937
																																								-68.8125	-69.1937		-67.4656	-67.95		-57.8906	-64.0125		-31.8781
																																								-68.8125	-69.1937		-67.4656	-67.95		-57.8906	-64.0125		-31.8781
																																								-59.2562	-61.6562		-57.5812	-60.6406		-47.7375	-50.9906		-31.9031
																																								-59.2562	-61.6562		-57.5812	-60.6406		-47.7375	-50.9906		-31.9031
																																								-54.7719	-56.8531		-52.8	-55.6344		-43.6375	-45.2437		-35.6406
																																								-54.7719	-56.8531		-52.8	-55.6344		-43.6375	-45.2437		-35.6406
																																								-53.1688	-54.85		-51.2469	-53.4375		-41.7875	-44.0844		-39.6187
																																								-53.1688	-54.85		-51.2469	-53.4375		-41.7875	-44.0844		-39.6187
																																								-45.8156	-49.0781		-44	-47.5562		-31.5656	-35.1063		-45.9813
																																								-45.8156	-49.0781		-44	-47.5562		-31.5656	-35.1063		-45.9813
																																								-48.7938	-50.5687		-46.9437	-49.0938		-36.0562	-38.8312		-49.85
																																								-48.7938	-50.5687		-46.9437	-49.0938		-36.0562	-38.8312		-49.85
																																								-53.3469	-54.2156		-51.6562	-52.8187		-41.3187	-45.175		-50.2781
																																								-53.3469	-54.2156		-51.6562	-52.8187		-41.3187	-45.175		-50.2781
																																								-54.75	-56.0438		-53.0187	-54.4469		-42.9062	-47.0625		-50.0406
																																								-54.75	-56.0438		-53.0187	-54.4469		-42.9062	-47.0625		-50.0406
																																								-54.8844	-56.4437		-53.2531	-55.0969		-43.2687	-46.7531		-49.9
																																								-54.8844	-56.4437		-53.2531	-55.0969		-43.2687	-46.7531		-49.9
																																								-54.8219	-56.3594		-53.1688	-55.0625		-43.0562	-46.5062		-49.7938
																																								-54.8219	-56.3594		-53.1688	-55.0625		-43.0562	-46.5062		-49.7938
																																								-54.875	-56.1781		-53.0938	-54.9688		-42.975	-46.3156		-49.75
																																								-54.875	-56.1781		-53.0938	-54.9688		-42.975	-46.3156		-49.75
																																								-54.7875	-56.15		-53.0562	-54.9844		-42.8719	-46.3844		-49.675
																																								-54.7875	-56.15		-53.0562	-54.9844		-42.8719	-46.3844		-49.675
																																								-54.8312	-56.1688		-53.0906	-55.0719		-42.7719	-46.3		-49.5906
																																								-54.8312	-56.1688		-53.0906	-55.0719		-42.7719	-46.3		-49.5906
																																								-54.7562	-56.0938		-53.125	-54.9625		-42.6937	-46.1562		-49.675
																																								-54.7562	-56.0938		-53.125	-54.9625		-42.6937	-46.1562		-49.675
																																								-54.7094	-56.1094		-53.1688	-54.7094		-42.7062	-46.0781		-49.55
																																								-54.7094	-56.1094		-53.1688	-54.7094		-42.7062	-46.0781		-49.55
																																								-54.7687	-56.15		-53.0594	-54.8406		-42.5938	-46.1594		-49.5219
																																								-54.7687	-56.15		-53.0594	-54.8406		-42.5938	-46.1594		-49.5219
																																								-54.8156	-56.2594		-53.1094	-55.1		-42.5938	-45.8812		-49.5281
																																								-54.8156	-56.2594		-53.1094	-55.1		-42.5938	-45.8812		-49.5281
																																								-54.7906	-56.3406		-53.1469	-54.9469		-42.5281	-46.0625		-49.5219
																																								-54.7906	-56.3406		-53.1469	-54.9469		-42.5281	-46.0625		-49.5219
																																								-54.6844	-56.3719		-53.1875	-54.9625		-42.5687	-45.9875		-49.4344
																																								-54.6844	-56.3719		-53.1875	-54.9625		-42.5687	-45.9875		-49.4344
																																								-54.9	-56.325		-53.1937	-54.9031		-42.4219	-45.8625		-49.525
																																								-54.9	-56.325		-53.1937	-54.9031		-42.4219	-45.8625		-49.525
																																								-54.9219	-56.1719		-53.1	-54.9813		-42.35	-46.0531		-49.6156
																																								-54.9219	-56.1719		-53.1	-54.9813		-42.35	-46.0531		-49.6156
																																								-54.85	-56.15		-53.4344	-55.1844		-42.4656	-45.9188		-49.6344
																																								-54.85	-56.15		-53.4344	-55.1844		-42.4656	-45.9188		-49.6344
																																								-54.6562	-56.25		-53.3531	-55.1937		-42.45	-45.9		-49.5594
																																								-54.6562	-56.25		-53.3531	-55.1937		-42.45	-45.9		-49.5594
																																								-54.8375	-56.25		-53.2875	-55.0656		-42.3844	-46.1		-49.5875
																																								-54.8375	-56.25		-53.2875	-55.0656		-42.3844	-46.1		-49.5875
																																								-55.0031	-56.3344		-53.2531	-54.9844		-42.2594	-45.9688		-49.5938
																																								-55.0031	-56.3344		-53.2531	-54.9844		-42.2594	-45.9688		-49.5938
																																								-54.9719	-56.3281		-53.3531	-54.9344		-42.1812	-45.9375		-49.6375
																																								-54.9719	-56.3281		-53.3531	-54.9344		-42.1812	-45.9375		-49.6375
																																								-54.85	-56.2188		-53.2313	-54.7938		-42.2	-45.9656		-49.7344
																																								-54.85	-56.2188		-53.2313	-54.7938		-42.2	-45.9656		-49.7344
																																								-54.9281	-56.2344		-53.3406	-54.8156		-42.2344	-46.0531		-49.8187
																																								-54.9281	-56.2344		-53.3406	-54.8156		-42.2344	-46.0531		-49.8187
																																								-54.95	-56.4188		-53.4031	-54.7219		-42.3281	-46.1656		-49.9
																																								-54.95	-56.4188		-53.4031	-54.7219		-42.3281	-46.1656		-49.9
																																								-55.15	-56.3563		-53.3781	-54.7656		-42.175	-46.1094		-49.7719
																																								-55.15	-56.3563		-53.3781	-54.7656		-42.175	-46.1094		-49.7719
																																								-54.9969	-56.3062		-53.3094	-54.9625		-42.2031	-45.9844		-49.6594
																																								-54.9969	-56.3062		-53.3094	-54.9625		-42.2031	-45.9844		-49.6594
																																								-55.0656	-56.2125		-53.4437	-54.9375		-42.3	-45.8469		-49.8125
																																								-55.0656	-56.2125		-53.4437	-54.9375		-42.3	-45.8469		-49.8125
																																								-55.0406	-56.25		-53.5156	-54.9875		-42.175	-45.7031		-49.825
																																								-55.0406	-56.25		-53.5156	-54.9875		-42.175	-45.7031		-49.825
																																								-54.9125	-56.2938		-53.3625	-54.875		-42.1437	-45.7031		-49.6719
																																								-54.9125	-56.2938		-53.3625	-54.875		-42.1437	-45.7031		-49.6719
																																								-54.9437	-56.4594		-53.3438	-54.9312		-42.0844	-45.9688		-49.8
																																								-54.9437	-56.4594		-53.3438	-54.9312		-42.0844	-45.9688		-49.8
																																								-55.0125	-56.7375		-53.4219	-55.0344		-42.125	-45.8031		-49.8531
																																								-55.0125	-56.7375		-53.4219	-55.0344		-42.125	-45.8031		-49.8531
																																								-54.8312	-56.4688		-53.425	-55.0031		-42.2906	-45.75		-49.9562
																																								-54.8312	-56.4688		-53.425	-55.0031		-42.2906	-45.75		-49.9562
																																								-54.9875	-56.45		-53.4594	-54.8563		-42.1875	-45.9437		-49.8375
																																								-54.9875	-56.45		-53.4594	-54.8563		-42.1875	-45.9437		-49.8375
																																								-55.0938	-56.6375		-53.5281	-54.9937		-42.0344	-45.9344		-49.8187
																																								-55.0938	-56.6375		-53.5281	-54.9937		-42.0344	-45.9344		-49.8187
																																								-54.9719	-56.6		-53.5969	-55.0875		-42	-45.9		-49.8062
																																								-54.9719	-56.6		-53.5969	-55.0875		-42	-45.9		-49.8062
																																								-54.9031	-56.5344		-53.4844	-55.1156		-42.2	-45.65		-49.7562
																																								-54.9031	-56.5344		-53.4844	-55.1156		-42.2	-45.65		-49.7562
																																								-54.9469	-56.4625		-53.4188	-55.25		-42.1344	-45.6656		-49.8375
																																								-54.9469	-56.4625		-53.4188	-55.25		-42.1344	-45.6656		-49.8375
																																								-55.0812	-56.3594		-53.3406	-55.25		-42.0094	-45.8		-49.8937
																																								-55.0812	-56.3594		-53.3406	-55.25		-42.0094	-45.8		-49.8937
																																								-54.9656	-56.425		-53.2906	-55.15		-41.9813	-45.8656		-49.8687
																																								-54.9656	-56.425		-53.2906	-55.15		-41.9813	-45.8656		-49.8687
																																								-55.1	-56.4906		-53.5344	-55.2		-42.0562	-45.6906		-49.7844
																																								-55.1	-56.4906		-53.5344	-55.2		-42.0562	-45.6906		-49.7844
																																								-55.1281	-56.5187		-53.7313	-55.3094		-41.9094	-45.6281		-49.7938
																																								-55.1281	-56.5187		-53.7313	-55.3094		-41.9094	-45.6281		-49.7938
																																								-55.1531	-56.6125		-53.6281	-55.25		-41.9688	-45.9813		-49.7875
																																								-55.1531	-56.6125		-53.6281	-55.25		-41.9688	-45.9813		-49.7875
																																								-55.2156	-56.5875		-53.5781	-55.2781		-41.95	-45.8656		-49.8219
																																								-55.2156	-56.5875		-53.5781	-55.2781		-41.95	-45.8656		-49.8219
																																								-55.1406	-56.5875		-53.525	-55.2875		-41.8937	-45.9		-49.8062
																																								-55.1406	-56.5875		-53.525	-55.2875		-41.8937	-45.9		-49.8062
																																								-55.05	-56.5969		-53.6656	-55.3875		-41.85	-45.7469		-49.9906
																																								-55.05	-56.5969		-53.6656	-55.3875		-41.85	-45.7469		-49.9906
																																								-55.3125	-56.4594		-53.6875	-55.2906		-41.85	-45.675		-49.8781
																																								-55.3125	-56.4594		-53.6875	-55.2906		-41.85	-45.675		-49.8781
																																								-55.275	-56.4844		-53.7094	-55.2281		-41.8469	-45.8312		-49.8031
																																								-55.275	-56.4844		-53.7094	-55.2281		-41.8469	-45.8312		-49.8031
																																								-55.2281	-56.475		-53.65	-55.4469		-41.9375	-45.7		-49.8969
																																								-55.2281	-56.475		-53.65	-55.4469		-41.9375	-45.7		-49.8969
																																								-55.3469	-56.3781		-53.7125	-55.3219		-41.85	-45.6781		-49.7938
																																								-55.3469	-56.3781		-53.7125	-55.3219		-41.85	-45.6781		-49.7938
																																								-55.3687	-56.4594		-53.5906	-55.3		-41.7281	-45.7938		-49.8094
																																								-55.3687	-56.4594		-53.5906	-55.3		-41.7281	-45.7938		-49.8094
																																								-55.1469	-56.5344		-53.5781	-55.2469		-41.8312	-45.8563		-49.825
																																								-55.1469	-56.5344		-53.5781	-55.2469		-41.8312	-45.8563		-49.825
																																								-55.225	-56.55		-53.5031	-55.2313		-41.8344	-45.8875		-49.9156
																																								-55.225	-56.55		-53.5031	-55.2313		-41.8344	-45.8875		-49.9156
																																								-55.4156	-56.4375		-53.3375	-55.4469		-41.7687	-45.7812		-49.8594
																																								-55.4156	-56.4375		-53.3375	-55.4469		-41.7687	-45.7812		-49.8594
																																								-55.4094	-56.4656		-53.1	-55.1937		-41.75	-45.6437		-49.8
																																								-55.4094	-56.4656		-53.1	-55.1937		-41.75	-45.6437		-49.8
																																								-55.1375	-56.3375		-52.85	-55.2		-41.75	-45.5219		-49.8781
																																								-55.1375	-56.3375		-52.85	-55.2		-41.75	-45.5219		-49.8781
																																								-55.0656	-56.4219		-52.3781	-55.2469		-41.6156	-45.5687		-49.8438
																																								-55.0656	-56.4219		-52.3781	-55.2469		-41.6156	-45.5687		-49.8438
																																								-55.0031	-56.6688		-52.2281	-55.2031		-41.6969	-45.7156		-49.6781
																																								-55.0031	-56.6688		-52.2281	-55.2031		-41.6969	-45.7156		-49.6781
																																								-55.125	-56.6406		-52.0875	-55.3219		-41.65	-45.45		-49.7906
																																								-55.125	-56.6406		-52.0875	-55.3219		-41.65	-45.45		-49.7906
																																								-55.2	-56.4312		-51.9188	-55.4062		-41.7469	-45.4188		-49.8875
																																								-55.2	-56.4312		-51.9188	-55.4062		-41.7469	-45.4188		-49.8875
																																								-55.0938	-56.5875		-51.7375	-55.4156		-41.5562	-45.4969		-49.8969
																																								-55.0938	-56.5875		-51.7375	-55.4156		-41.5562	-45.4969		-49.8969
																																								-54.8844	-56.6406		-51.5281	-55.3875		-41.3969	-45.5156		-49.6219
																																								-54.8844	-56.6406		-51.5281	-55.3875		-41.3969	-45.5156		-49.6219
																																								-54.9031	-56.55		-51.2781	-55.4062		-41.3969	-45.3		-49.7188
																																								-54.9031	-56.55		-51.2781	-55.4062		-41.3969	-45.3		-49.7188
																																								-54.75	-56.65		-51	-55.3781		-41.4344	-45.3094		-49.6688
																																								-54.75	-56.65		-51	-55.3781		-41.4344	-45.3094		-49.6688
																																								-54.7344	-56.6063		-50.8219	-55.1937		-41.4406	-45.325		-49.5812
																																								-54.7344	-56.6063		-50.8219	-55.1937		-41.4406	-45.325		-49.5812
																																								-54.6781	-56.55		-50.7281	-55.1656		-41.3969	-45.3625		-49.7
																																								-54.6781	-56.55		-50.7281	-55.1656		-41.3969	-45.3625		-49.7
																																								-54.4094	-56.5625		-50.7594	-55.4031		-41.4656	-45.2656		-49.55
																																								-54.4094	-56.5625		-50.7594	-55.4031		-41.4656	-45.2656		-49.55
																																								-54.4375	-56.5938		-50.675	-55.3719		-41.4219	-45.3187		-49.4406
																																								-54.4375	-56.5938		-50.675	-55.3719		-41.4219	-45.3187		-49.4406
																																								-54.4125	-56.7406		-50.5938	-55.4469		-41.4437	-45.3281		-49.4406
																																								-54.4125	-56.7406		-50.5938	-55.4469		-41.4437	-45.3281		-49.4406
																																								-54.3156	-56.5625		-50.4656	-55.5438		-41.3656	-45.225		-49.3875
																																								-54.3156	-56.5625		-50.4656	-55.5438		-41.3656	-45.225		-49.3875
																																								-54.1125	-56.5094		-50.2906	-55.425		-41.1937	-45.2156		-49.3469
																																								-54.1125	-56.5094		-50.2906	-55.425		-41.1937	-45.2156		-49.3469
																																								-54.0938	-56.5625		-50.2906	-55.6		-41.2344	-45.1625		-49.3969
																																								-54.0938	-56.5625		-50.2906	-55.6		-41.2344	-45.1625		-49.3969
																																								-54.0438	-56.5312		-50.45	-55.5625		-41.2094	-45.1187		-49.4281
																																								-54.0438	-56.5312		-50.45	-55.5625		-41.2094	-45.1187		-49.4281
																																								-54.0625	-56.7562		-50.1844	-55.6094		-41.2687	-45.0656		-49.45
																																								-54.0625	-56.7562		-50.1844	-55.6094		-41.2687	-45.0656		-49.45
																																								-53.6719	-56.6625		-49.9531	-55.5125		-41.1531	-44.8812		-49.3563
																																								-53.6719	-56.6625		-49.9531	-55.5125		-41.1531	-44.8812		-49.3563
																																								-53.5656	-56.675		-49.9281	-55.55		-41.0969	-44.7188		-49.4219
																																								-53.5656	-56.675		-49.9281	-55.55		-41.0969	-44.7188		-49.4219
																																								-53.6125	-56.725		-49.9562	-55.4844		-41.175	-45.1344		-49.3062
																																								-53.6125	-56.725		-49.9562	-55.4844		-41.175	-45.1344		-49.3062
																																								-53.5438	-56.7		-49.8094	-55.4875		-41.0125	-45.2156		-49.2156
																																								-53.5438	-56.7		-49.8094	-55.4875		-41.0125	-45.2156		-49.2156
																																								-53.3594	-56.525		-49.7844	-55.45		-41.0531	-45.2812		-49
																																								-53.3594	-56.525		-49.7844	-55.45		-41.0531	-45.2812		-49
																																								-53.2906	-56.5062		-49.8312	-55.4125		-41.0312	-45.1		-49.075
																																								-53.2906	-56.5062		-49.8312	-55.4125		-41.0312	-45.1		-49.075
																																								-53.0969	-56.4312		-49.55	-55.4656		-40.9	-44.9688		-49.0687
																																								-53.0969	-56.4312		-49.55	-55.4656		-40.9	-44.9688		-49.0687
																																								-53.0375	-56.5		-49.5469	-55.4469		-40.8375	-44.8625		-48.8906
																																								-53.0375	-56.5		-49.5469	-55.4469		-40.8375	-44.8625		-48.8906
																																								-53.1125	-56.4781		-49.5938	-55.3719		-40.9031	-45.0656		-48.8875
																																								-53.1125	-56.4781		-49.5938	-55.3719		-40.9031	-45.0656		-48.8875
																																								-53	-56.4281		-49.6	-55.3		-40.9312	-44.8844		-48.8531
																																								-53	-56.4281		-49.6	-55.3		-40.9312	-44.8844		-48.8531
																																								-52.7219	-56.45		-49.65	-55.275		-40.7406	-44.9188		-48.8375
																																								-52.7219	-56.45		-49.65	-55.275		-40.7406	-44.9188		-48.8375
																																								-52.8406	-56.5781		-49.5562	-55.2375		-40.7656	-44.7625		-48.675
																																								-52.8406	-56.5781		-49.5562	-55.2375		-40.7656	-44.7625		-48.675
																																								-52.8563	-56.5		-49.5	-55.2375		-40.8062	-44.7594		-48.6937
																																								-52.8563	-56.5		-49.5	-55.2375		-40.8062	-44.7594		-48.6937
																																								-52.6156	-56.4656		-49.275	-55.3687		-40.6656	-44.7562		-48.6469
																																								-52.6156	-56.4656		-49.275	-55.3687		-40.6656	-44.7562		-48.6469
																																								-52.35	-56.4875		-49.3687	-55.2281		-40.5281	-44.7969		-48.4719
																																								-52.35	-56.4875		-49.3687	-55.2281		-40.5281	-44.7969		-48.4719
																																								-52.4906	-56.3594		-49.3812	-54.9813		-40.5375	-44.8625		-48.5375
																																								-52.4906	-56.3594		-49.3812	-54.9813		-40.5375	-44.8625		-48.5375
																																								-52.5406	-56.3844		-49.2625	-54.7906		-40.425	-44.7594		-48.4375
																																								-52.5406	-56.3844		-49.2625	-54.7906		-40.425	-44.7594		-48.4375
																																								-52.4125	-56.3781		-49.3187	-54.9437		-40.625	-44.6688		-48.3
																																								-52.4125	-56.3781		-49.3187	-54.9437		-40.625	-44.6688		-48.3
																																								-52.3031	-56.2375		-49.4562	-55.1688		-40.6063	-44.6		-48.1625
																																								-52.3031	-56.2375		-49.4562	-55.1688		-40.6063	-44.6		-48.1625
																																								-52.3875	-56.2906		-49.3844	-55		-40.5719	-44.6375		-48.35
																																								-52.3875	-56.2906		-49.3844	-55		-40.5719	-44.6375		-48.35
																																								-52.3	-56.2		-49.1844	-54.9437		-40.4625	-44.4906		-48.2969
																																								-52.3	-56.2		-49.1844	-54.9437		-40.4625	-44.4906		-48.2969
																																								-52.2281	-56.2531		-49.2219	-54.9562		-40.4312	-44.3344		-48.1469
																																								-52.2281	-56.2531		-49.2219	-54.9562		-40.4312	-44.3344		-48.1469
																																								-52.1531	-56.0312		-49.3531	-54.9062		-40.4219	-44.25		-48.15
																																								-52.1531	-56.0312		-49.3531	-54.9062		-40.4219	-44.25		-48.15
																																								-52.125	-55.9469		-49.4844	-54.7375		-40.2781	-44.0187		-48.0531
																																								-52.125	-55.9469		-49.4844	-54.7375		-40.2781	-44.0187		-48.0531
																																								-51.95	-55.9875		-49.3531	-54.8563		-40.2812	-44.1312		-47.9719
																																								-51.95	-55.9875		-49.3531	-54.8563		-40.2812	-44.1312		-47.9719
																																								-51.9781	-55.9281		-49.3375	-54.8656		-40.1969	-44.2844		-47.975
																																								-51.9781	-55.9281		-49.3375	-54.8656		-40.1969	-44.2844		-47.975
																																								-52.0281	-55.9969		-49.4156	-54.7562		-40.1719	-44.3219		-47.7531
																																								-52.0281	-55.9969		-49.4156	-54.7562		-40.1719	-44.3219		-47.7531
																																								-51.8906	-55.8969		-49.275	-54.7		-40.0656	-44.2781		-47.8312
																																								-51.8906	-55.8969		-49.275	-54.7		-40.0656	-44.2781		-47.8312
																																								-51.6656	-55.7		-49.25	-54.6063		-40.075	-44.1375		-47.7969
																																								-51.6656	-55.7		-49.25	-54.6063		-40.075	-44.1375		-47.7969
																																								-51.6812	-55.65		-49.1875	-54.5938		-40.0719	-43.85		-47.6
																																								-51.6812	-55.65		-49.1875	-54.5938		-40.0719	-43.85		-47.6
																																								-51.8094	-55.7281		-49.1094	-54.6875		-39.9531	-44.0156		-47.6
																																								-51.8094	-55.7281		-49.1094	-54.6875		-39.9531	-44.0156		-47.6
																																								-51.5	-55.6625		-49.0625	-54.7062		-39.95	-44.0375		-47.5781
																																								-51.5	-55.6625		-49.0625	-54.7062		-39.95	-44.0375		-47.5781
																																								-51.3219	-55.5687		-49.2156	-54.7188		-39.7969	-43.8687		-47.4281
																																								-51.3219	-55.5687		-49.2156	-54.7188		-39.7969	-43.8687		-47.4281
																																								-51.3969	-55.4562		-49.15	-54.6187		-39.6937	-43.8781		-47.4688
																																								-51.3969	-55.4562		-49.15	-54.6187		-39.6937	-43.8781		-47.4688
																																								-51.2	-55.25		-48.95	-54.5375		-39.5156	-44.0156		-47.5969
																																								-51.2	-55.25		-48.95	-54.5375		-39.5156	-44.0156		-47.5969
																																								-51.2	-55.5469		-49.0281	-54.6281		-39.8062	-43.6312		-47.3781
																																								-51.2	-55.5469		-49.0281	-54.6281		-39.8062	-43.6312		-47.3781
																																								-51.2	-55.4688		-49.0375	-54.525		-39.7719	-43.6562		-47.2219
																																								-51.2	-55.4688		-49.0375	-54.525		-39.7719	-43.6562		-47.2219
																																								-51.0594	-55.3781		-49.0406	-54.3719		-39.6875	-43.7406		-47.2219
																																								-51.0594	-55.3781		-49.0406	-54.3719		-39.6875	-43.7406		-47.2219
																																								-50.9219	-55.1812		-48.9562	-54.3594		-39.5531	-43.85		-47.0812
																																								-50.9219	-55.1812		-48.9562	-54.3594		-39.5531	-43.85		-47.0812
																																								-50.95	-55.1125		-48.9281	-54.3719		-39.6812	-43.7062		-47.2125
																																								-50.95	-55.1125		-48.9281	-54.3719		-39.6812	-43.7062		-47.2125
																																								-50.8812	-55.2344		-48.7625	-54.4219		-39.4875	-43.6625		-47.0594
																																								-50.8812	-55.2344		-48.7625	-54.4219		-39.4875	-43.6625		-47.0594
																																								-50.8438	-55.1875		-48.6688	-54.4219		-39.4844	-43.45		-47.0625
																																								-50.8438	-55.1875		-48.6688	-54.4219		-39.4844	-43.45		-47.0625
																																								-50.8438	-55.1531		-48.5312	-54.4156		-39.4125	-43.45		-46.9688
																																								-50.8438	-55.1531		-48.5312	-54.4156		-39.4125	-43.45		-46.9688
																																								-50.8594	-55.1		-48.4344	-54.2812		-39.5156	-43.6281		-46.9969
																																								-50.8594	-55.1		-48.4344	-54.2812		-39.5156	-43.6281		-46.9969
																																								-50.7625	-54.825		-48.4562	-54.1031		-39.4969	-43.7031		-46.8937
																																								-50.7625	-54.825		-48.4562	-54.1031		-39.4969	-43.7031		-46.8937
																																								-50.6688	-55.05		-48.6094	-54.1594		-39.55	-43.6		-46.8594
																																								-50.6688	-55.05		-48.6094	-54.1594		-39.55	-43.6		-46.8594
																																								-50.5594	-54.8656		-48.5719	-54.2906		-39.3594	-43.5375		-46.8812
																																								-50.5594	-54.8656		-48.5719	-54.2906		-39.3594	-43.5375		-46.8812
																																								-50.5031	-54.6187		-48.4937	-54.2062		-39.4437	-43.3156		-46.6875
																																								-50.5031	-54.6187		-48.4937	-54.2062		-39.4437	-43.3156		-46.6875
																																								-50.3906	-54.6719		-48.3656	-54.1812		-39.2938	-43.0875		-46.6906
																																								-50.3906	-54.6719		-48.3656	-54.1812		-39.2938	-43.0875		-46.6906
																																								-50.4875	-54.7875		-48.4281	-54.175		-39.3594	-43.25		-46.8
																																								-50.4875	-54.7875		-48.4281	-54.175		-39.3594	-43.25		-46.8
																																								-50.4375	-54.6781		-48.3062	-54.1344		-39.225	-43.225		-46.7719
																																								-50.4375	-54.6781		-48.3062	-54.1344		-39.225	-43.225		-46.7719
																																								-50.3781	-54.6187		-48.2437	-54.0469		-39.25	-43.1719		-46.75
																																								-50.3781	-54.6187		-48.2437	-54.0469		-39.25	-43.1719		-46.75
																																								-50.3	-54.5938		-48.2594	-54.0094		-39.1	-43.25		-46.5656
																																								-50.3	-54.5938		-48.2594	-54.0094		-39.1	-43.25		-46.5656
																																								-50.3719	-54.5062		-48.1	-54.0469		-39.1	-43.3375		-46.4656
																																								-50.3719	-54.5062		-48.1	-54.0469		-39.1	-43.3375		-46.4656
																																								-50.3781	-54.5938		-48.1	-53.8812		-39.2437	-43.2687		-46.3844
																																								-50.3781	-54.5938		-48.1	-53.8812		-39.2437	-43.2687		-46.3844
																																								-50.1906	-54.4688		-48.1906	-53.8375		-39.1781	-43.3125		-46.4219
																																								-50.1906	-54.4688		-48.1906	-53.8375		-39.1781	-43.3125		-46.4219
																																								-50.15	-54.4188		-48.2469	-53.75		-39.1531	-43.2		-46.325
																																								-50.15	-54.4188		-48.2469	-53.75		-39.1531	-43.2		-46.325
																																								-50.1406	-54.475		-48.1594	-53.7406		-39.0781	-43.2		-46.3781
																																								-50.1406	-54.475		-48.1594	-53.7406		-39.0781	-43.2		-46.3781
																																								-50.2125	-54.2156		-48.0969	-53.775		-39.2562	-43.0812		-46.3375
																																								-50.2125	-54.2156		-48.0969	-53.775		-39.2562	-43.0812		-46.3375
																																								-50.2531	-54.2812		-48.275	-53.7781		-39.1469	-42.9406		-46.2188
																																								-50.2531	-54.2812		-48.275	-53.7781		-39.1469	-42.9406		-46.2188
																																								-50.2219	-54.225		-48.3563	-53.7844		-39.0781	-42.9531		-46.1125
																																								-50.2219	-54.225		-48.3563	-53.7844		-39.0781	-42.9531		-46.1125
																																								-50.1375	-54.2719		-48.1594	-53.65		-38.9969	-43.0375		-46.1469
																																								-50.1375	-54.2719		-48.1594	-53.65		-38.9969	-43.0375		-46.1469
																																								-50.0625	-54.45		-47.9906	-53.5281		-38.9062	-43.0594		-46.0687
																																								-50.0625	-54.45		-47.9906	-53.5281		-38.9062	-43.0594		-46.0687
																																								-50.1625	-54.4406		-47.8563	-53.65		-38.7781	-42.9844		-46.0625
																																								-50.1625	-54.4406		-47.8563	-53.65		-38.7781	-42.9844		-46.0625
																																								-50.3125	-54.3875		-48.0312	-53.7625		-38.925	-43.0687		-46.0031
																																								-50.3125	-54.3875		-48.0312	-53.7625		-38.925	-43.0687		-46.0031
																																								-50.3156	-54.1906		-48.2437	-53.7		-39.0594	-43.2125		-46.025
																																								-50.3156	-54.1906		-48.2437	-53.7		-39.0594	-43.2125		-46.025
																																								-50.225	-54.2625		-48.3281	-53.675		-39.0031	-43.0906		-45.9875
																																								-50.225	-54.2625		-48.3281	-53.675		-39.0031	-43.0906		-45.9875
																																								-50.1625	-54.2906		-48.0375	-53.7656		-38.85	-42.9375		-45.9469
																																								-50.1625	-54.2906		-48.0375	-53.7656		-38.85	-42.9375		-45.9469
																																								-50.0906	-54.2531		-48.0594	-53.7219		-38.8906	-42.9875		-46.025
																																								-50.0906	-54.2531		-48.0594	-53.7219		-38.8906	-42.9875		-46.025
																																								-50.0344	-54.2719		-48.1344	-53.8219		-38.9156	-42.8781		-45.9125
																																								-50.0344	-54.2719		-48.1344	-53.8219		-38.9156	-42.8781		-45.9125
																																								-50.025	-54.2125		-48.2406	-53.7906		-38.7656	-43.0625		-45.8969
																																								-50.025	-54.2125		-48.2406	-53.7906		-38.7656	-43.0625		-45.8969
																																								-49.85	-53.9719		-48.2188	-53.7562		-38.8906	-43.0094		-45.9
																																								-49.85	-53.9719		-48.2188	-53.7562		-38.8906	-43.0094		-45.9
																																								-49.9531	-54.1437		-48.2906	-53.6031		-38.8094	-42.9		-45.8531
																																								-49.9531	-54.1437		-48.2906	-53.6031		-38.8094	-42.9		-45.8531
																																								-50.1594	-54.15		-48.3656	-53.6625		-38.8656	-42.8187		-45.9
																																								-50.1594	-54.15		-48.3656	-53.6625		-38.8656	-42.8187		-45.9
																																								-49.9562	-54.2281		-48.2687	-53.4031		-38.7594	-42.7906		-45.8531
																																								-49.9562	-54.2281		-48.2687	-53.4031		-38.7594	-42.7906		-45.8531
																																								-49.95	-53.9844		-48.2406	-53.2313		-38.6937	-42.8906		-45.6781
																																								-49.95	-53.9844		-48.2406	-53.2313		-38.6937	-42.8906		-45.6781
																																								-50.0187	-53.8844		-48.2594	-53.3062		-38.65	-42.9312		-45.7031
																																								-50.0187	-53.8844		-48.2594	-53.3062		-38.65	-42.9312		-45.7031
																																								-50.0344	-53.9		-48.3375	-53.4406		-38.8031	-42.7656		-45.7344
																																								-50.0344	-53.9		-48.3375	-53.4406		-38.8031	-42.7656		-45.7344
																																								-49.9875	-53.9062		-48.2938	-53.6156		-38.5438	-42.725		-45.7031
																																								-49.9875	-53.9062		-48.2938	-53.6156		-38.5438	-42.725		-45.7031
																																								-49.9125	-53.9094		-48.2188	-53.5469		-38.4406	-42.6063		-45.7094
																																								-49.9125	-53.9094		-48.2188	-53.5469		-38.4406	-42.6063		-45.7094
																																								-49.925	-53.9437		-48.2656	-53.55		-38.5344	-42.65		-45.7062
																																								-49.925	-53.9437		-48.2656	-53.55		-38.5344	-42.65		-45.7062
																																								-49.9875	-53.9156		-48.1344	-53.45		-38.5938	-42.7469		-45.5719
																																								-49.9875	-53.9156		-48.1344	-53.45		-38.5938	-42.7469		-45.5719
																																								-49.9125	-53.8312		-48.1094	-53.3687		-38.4	-42.55		-45.575
																																								-49.9125	-53.8312		-48.1094	-53.3687		-38.4	-42.55		-45.575
																																								-49.9	-53.8687		-48.275	-53.3563		-38.3625	-42.6969		-45.5031
																																								-49.9	-53.8687		-48.275	-53.3563		-38.3625	-42.6969		-45.5031
																																								-49.9719	-53.9969		-48.325	-53.3469		-38.3	-42.375		-45.5656
																																								-49.9719	-53.9969		-48.325	-53.3469		-38.3	-42.375		-45.5656
																																								-49.9875	-54.0531		-48.3531	-53.2906		-38.3	-42.5406		-45.5594
																																								-49.9875	-54.0531		-48.3531	-53.2906		-38.3	-42.5406		-45.5594
																																								-49.8531	-53.8812		-48.35	-53.3781		-38.15	-42.5344		-45.5125
																																								-49.8531	-53.8812		-48.35	-53.3781		-38.15	-42.5344		-45.5125
																																								-49.9344	-53.9031		-48.3062	-53.2188		-38.2188	-42.5344		-45.5438
																																								-49.9344	-53.9031		-48.3062	-53.2188		-38.2188	-42.5344		-45.5438
																																								-50.0187	-53.8906		-48.3156	-53.0125		-38.2812	-42.6875		-45.6
																																								-50.0187	-53.8906		-48.3156	-53.0125		-38.2812	-42.6875		-45.6
																																								-50.0812	-53.8156		-48.2437	-53.1469		-38.2344	-42.5469		-45.4531
																																								-50.0812	-53.8156		-48.2437	-53.1469		-38.2344	-42.5469		-45.4531
																																								-50.1	-53.7125		-48.3094	-53.3687		-38.2313	-42.5687		-45.4656
																																								-50.1	-53.7125		-48.3094	-53.3687		-38.2313	-42.5687		-45.4656
																																								-50.1312	-53.8687		-48.25	-53.4		-38.2625	-42.7125		-45.45
																																								-50.1312	-53.8687		-48.25	-53.4		-38.2625	-42.7125		-45.45
																																								-50.2656	-53.9281		-48.325	-53.4219		-38.175	-42.5719		-45.4562
																																								-50.2656	-53.9281		-48.325	-53.4219		-38.175	-42.5719		-45.4562
																																								-50.075	-53.7656		-48.4688	-53.2656		-38.0844	-42.425		-45.5094
																																								-50.075	-53.7656		-48.4688	-53.2656		-38.0844	-42.425		-45.5094
																																								-50.05	-53.9312		-48.5219	-53.3594		-38.0406	-42.5094		-45.4437
																																								-50.05	-53.9312		-48.5219	-53.3594		-38.0406	-42.5094		-45.4437
																																								-50.0969	-53.7812		-48.3875	-53.3312		-38.0219	-42.4344		-45.4531
																																								-50.0969	-53.7812		-48.3875	-53.3312		-38.0219	-42.4344		-45.4531
																																								-50.0156	-53.7437		-48.3781	-53.3875		-38.0938	-42.6469		-45.3906
																																								-50.0156	-53.7437		-48.3781	-53.3875		-38.0938	-42.6469		-45.3906
																																								-50	-53.8438		-48.2812	-53.2844		-38.1437	-42.6469		-45.4
																																								-50	-53.8438		-48.2812	-53.2844		-38.1437	-42.6469		-45.4
																																								-50.1156	-53.7188		-48.3187	-53.3219		-38.075	-42.4375		-45.4406
																																								-50.1156	-53.7188		-48.3187	-53.3219		-38.075	-42.4375		-45.4406
																																								-50.35	-53.75		-48.3	-53.25		-37.9813	-42.3906		-45.425
																																								-50.35	-53.75		-48.3	-53.25		-37.9813	-42.3906		-45.425
																																								-50.3687	-53.7375		-48.4406	-53.4344		-38.0938	-42.2969		-45.4469
																																								-50.3687	-53.7375		-48.4406	-53.4344		-38.0938	-42.2969		-45.4469
																																								-50.3438	-53.7562		-48.5687	-53.3719		-37.975	-42.1156		-45.425
																																								-50.3438	-53.7562		-48.5687	-53.3719		-37.975	-42.1156		-45.425
																																								-50.3	-53.8906		-48.5906	-53.1844		-37.9437	-42.2281		-45.4875
																																								-50.3	-53.8906		-48.5906	-53.1844		-37.9437	-42.2281		-45.4875
																																								-50.4156	-53.9469		-48.55	-53.0844		-37.9094	-42.175		-45.4625
																																								-50.4156	-53.9469		-48.55	-53.0844		-37.9094	-42.175		-45.4625
																																								-50.3	-53.7719		-48.4813	-53.1312		-37.9375	-42.2906		-45.4312
																																								-50.3	-53.7719		-48.4813	-53.1312		-37.9375	-42.2906		-45.4312
																																								-50.1969	-53.8219		-48.5156	-53.1875		-37.9937	-42.2469		-45.4188
																																								-50.1969	-53.8219		-48.5156	-53.1875		-37.9937	-42.2469		-45.4188
																																								-50.2906	-53.7344		-48.4188	-53.1437		-37.9281	-42.15		-45.3219
																																								-50.2906	-53.7344		-48.4188	-53.1437		-37.9281	-42.15		-45.3219
																																								-50.425	-53.6594		-48.4094	-53.2281		-37.9813	-42.3		-45.2562
																																								-50.425	-53.6594		-48.4094	-53.2281		-37.9813	-42.3		-45.2562
																																								-50.3469	-53.7781		-48.75	-53.2781		-38	-42.3125		-45.3875
																																								-50.3469	-53.7781		-48.75	-53.2781		-38	-42.3125		-45.3875
																																								-50.475	-53.7469		-48.5531	-53.15		-38.1875	-42.3438		-45.3156
																																								-50.475	-53.7469		-48.5531	-53.15		-38.1875	-42.3438		-45.3156
																																								-50.4719	-53.7156		-48.6219	-53.2719		-37.8719	-42.3844		-45.475
																																								-50.4719	-53.7156		-48.6219	-53.2719		-37.8719	-42.3844		-45.475
																																								-50.4031	-53.6719		-48.75	-53.2		-37.975	-42.3219		-45.3937
																																								-50.4031	-53.6719		-48.75	-53.2		-37.975	-42.3219		-45.3937
																																								-50.4969	-53.8469		-48.7531	-53.1125		-37.7156	-42.4375		-45.45
																																								-50.4969	-53.8469		-48.7531	-53.1125		-37.7156	-42.4375		-45.45
																																								-50.4562	-54.0187		-48.8187	-53.025		-37.7594	-42.3844		-45.3812
																																								-50.4562	-54.0187		-48.8187	-53.025		-37.7594	-42.3844		-45.3812
																																								-50.4	-54.0375		-48.7406	-53.1156		-37.7969	-42.4562		-45.375
																																								-50.4	-54.0375		-48.7406	-53.1156		-37.7969	-42.4562		-45.375
																																								-50.4375	-53.8		-48.7125	-53.0094		-37.8656	-42.5375		-45.2344
																																								-50.4375	-53.8		-48.7125	-53.0094		-37.8656	-42.5375		-45.2344
																																								-50.5562	-53.7781		-48.5875	-52.8937		-37.9656	-42.2281		-45.2812
																																								-50.5562	-53.7781		-48.5875	-52.8937		-37.9656	-42.2281		-45.2812
																																								-50.4906	-53.5687		-48.6531	-52.8125		-37.9031	-42.2812		-45.3187
																																								-50.4906	-53.5687		-48.6531	-52.8125		-37.9031	-42.2812		-45.3187
																																								-50.5594	-53.675		-48.8	-52.8812		-37.8594	-42.2906		-45.4344
																																								-50.5594	-53.675		-48.8	-52.8812		-37.8594	-42.2906		-45.4344
																																								-50.5656	-53.8156		-48.9094	-52.95		-37.8844	-42.1656		-45.3062
																																								-50.5656	-53.8156		-48.9094	-52.95		-37.8844	-42.1656		-45.3062
																																								-50.5469	-53.8531		-48.7938	-52.9719		-37.8656	-42.1937		-45.3031
																																								-50.5469	-53.8531		-48.7938	-52.9719		-37.8656	-42.1937		-45.3031
																																								-50.4937	-53.7906		-48.7344	-53.0187		-37.825	-42.2406		-45.4688
																																								-50.4937	-53.7906		-48.7344	-53.0187		-37.825	-42.2406		-45.4688
																																								-50.6	-53.7094		-48.75	-53.1125		-37.7313	-42.2		-45.4469
																																								-50.6	-53.7094		-48.75	-53.1125		-37.7313	-42.2		-45.4469
																																								-50.75	-53.575		-48.8687	-53.1094		-37.7625	-42.2		-45.4656
																																								-50.75	-53.575		-48.8687	-53.1094		-37.7625	-42.2		-45.4656
																																								-50.8094	-53.6469		-48.75	-53.0187		-37.6562	-42.1031		-45.3156
																																								-50.8094	-53.6469		-48.75	-53.0187		-37.6562	-42.1031		-45.3156
																																								-50.6031	-53.8469		-48.625	-53.0312		-37.7375	-42.0562		-45.4406
																																								-50.6031	-53.8469		-48.625	-53.0312		-37.7375	-42.0562		-45.4406
																																								-50.5812	-53.7531		-48.8	-53.0187		-37.8375	-42.225		-45.3094
																																								-50.5812	-53.7531		-48.8	-53.0187		-37.8375	-42.225		-45.3094
																																								-50.4875	-53.8062		-48.8625	-52.8281		-37.8625	-42.1344		-45.2969
																																								-50.4875	-53.8062		-48.8625	-52.8281		-37.8625	-42.1344		-45.2969
																																								-50.6187	-53.7781		-48.9094	-52.7062		-37.9062	-41.9844		-45.3281
																																								-50.6187	-53.7781		-48.9094	-52.7062		-37.9062	-41.9844		-45.3281
																																								-50.6	-53.7938		-48.85	-52.8094		-37.9562	-42.2375		-45.3469
																																								-50.6	-53.7938		-48.85	-52.8094		-37.9562	-42.2375		-45.3469
																																								-50.7344	-53.7375		-48.7281	-52.8531		-37.8187	-42.2281		-45.3312
																																								-50.7344	-53.7375		-48.7281	-52.8531		-37.8187	-42.2281		-45.3312
																																								-50.7188	-53.8156		-48.8	-52.9625		-37.7437	-42.1375		-45.3406
																																								-50.7188	-53.8156		-48.8	-52.9625		-37.7437	-42.1375		-45.3406
																																								-50.7281	-53.8469		-48.8937	-53		-37.6906	-42.1906		-45.4281
																																								-50.7281	-53.8469		-48.8937	-53		-37.6906	-42.1906		-45.4281
																																								-50.85	-53.95		-48.8406	-53.075		-37.6875	-42.1906		-45.3125
																																								-50.85	-53.95		-48.8406	-53.075		-37.6875	-42.1906		-45.3125
																																								-50.7875	-53.9406		-48.875	-52.9969		-37.7062	-41.9844		-45.3
																																								-50.7875	-53.9406		-48.875	-52.9969		-37.7062	-41.9844		-45.3
																																								-50.7344	-53.85		-48.925	-52.95		-37.75	-42.1562		-45.3531
																																								-50.7344	-53.85		-48.925	-52.95		-37.75	-42.1562		-45.3531
																																								-50.8125	-53.8312		-49.0938	-52.9813		-37.7281	-42.2562		-45.5031
																																								-50.8125	-53.8312		-49.0938	-52.9813		-37.7281	-42.2562		-45.5031
																																								-50.6375	-53.9656		-49.0875	-52.8687		-37.9656	-42.275		-45.3781
																																								-50.6375	-53.9656		-49.0875	-52.8687		-37.9656	-42.275		-45.3781
																																								-50.9875	-54.0719		-49.0562	-52.8719		-37.9531	-42.1469		-45.45
																																								-50.9875	-54.0719		-49.0562	-52.8719		-37.9531	-42.1469		-45.45
																																								-51.0125	-53.9813		-49.1312	-53.0406		-37.9813	-42.0469		-45.4781
																																								-51.0125	-53.9813		-49.1312	-53.0406		-37.9813	-42.0469		-45.4781
																																								-50.8625	-54.0281		-49.0625	-53		-37.95	-42.1688		-45.5438
																																								-50.8625	-54.0281		-49.0625	-53		-37.95	-42.1688		-45.5438
																																								-50.85	-54.0531		-49.1875	-52.85		-37.8187	-42.0531		-45.5
																																								-50.85	-54.0531		-49.1875	-52.85		-37.8187	-42.0531		-45.5
																																								-50.8719	-54.1594		-49.1625	-52.8625		-37.8094	-41.8438		-45.3906
																																								-50.8719	-54.1594		-49.1625	-52.8625		-37.8094	-41.8438		-45.3906
																																								-50.7875	-54.0281		-48.95	-53.0156		-37.9625	-41.9531		-45.375
																																								-50.7875	-54.0281		-48.95	-53.0156		-37.9625	-41.9531		-45.375
																																								-50.9062	-54.1281		-49.0719	-53.05		-37.925	-42.2437		-45.3094
																																								-50.9062	-54.1281		-49.0719	-53.05		-37.925	-42.2437		-45.3094
																																								-50.7844	-54.2		-49.1063	-52.9594		-37.8687	-42.2		-45.5156
																																								-50.7844	-54.2		-49.1063	-52.9594		-37.8687	-42.2		-45.5156
																																								-50.7938	-54.1375		-49.15	-53.0875		-37.7844	-41.9406		-45.2812
																																								-50.7938	-54.1375		-49.15	-53.0875		-37.7844	-41.9406		-45.2812
																																								-50.85	-54.0812		-49.1781	-53.0656		-37.75	-42.0406		-45.2844
																																								-50.85	-54.0812		-49.1781	-53.0656		-37.75	-42.0406		-45.2844
																																								-50.9031	-53.9906		-49.2344	-53.15		-37.6094	-42.0938		-45.3563
																																								-50.9031	-53.9906		-49.2344	-53.15		-37.6094	-42.0938		-45.3563
																																								-50.85	-53.9594		-49.1594	-53.1906		-37.7	-42.1656		-45.475
																																								-50.85	-53.9594		-49.1594	-53.1906		-37.7	-42.1656		-45.475
																																								-50.95	-54.1031		-49.3344	-53.15		-37.7437	-41.9		-45.4844
																																								-50.95	-54.1031		-49.3344	-53.15		-37.7437	-41.9		-45.4844
																																								-50.9781	-54.1594		-49.2594	-52.9625		-37.6344	-41.9562		-45.2406
																																								-50.9781	-54.1594		-49.2594	-52.9625		-37.6344	-41.9562		-45.2406
																																								-50.9	-54.1063		-49.2562	-53		-37.5812	-41.7656		-45.3625
																																								-50.9	-54.1063		-49.2562	-53		-37.5812	-41.7656		-45.3625
																																								-50.8219	-54.1		-49.2844	-53.05		-37.4969	-41.8281		-45.3719
																																								-50.8219	-54.1		-49.2844	-53.05		-37.4969	-41.8281		-45.3719
																																								-50.9656	-54.2094		-49.2812	-52.9844		-37.5469	-41.9813		-45.4125
																																								-50.9656	-54.2094		-49.2812	-52.9844		-37.5469	-41.9813		-45.4125
																																								-51.1688	-54.2375		-49.25	-53.2		-37.5781	-42.1937		-45.4125
																																								-51.1688	-54.2375		-49.25	-53.2		-37.5781	-42.1937		-45.4125
																																								-51.0719	-54.3		-49.2656	-53.2687		-37.4906	-41.9531		-45.4312
																																								-51.0719	-54.3		-49.2656	-53.2687		-37.4906	-41.9531		-45.4312
																																								-51.0875	-54.4062		-49.5219	-53.3187		-37.5781	-41.9719		-45.4094
																																								-51.0875	-54.4062		-49.5219	-53.3187		-37.5781	-41.9719		-45.4094
																																								-51.15	-54.35		-49.45	-53.3		-37.5781	-41.8937		-45.2969
																																								-51.15	-54.35		-49.45	-53.3		-37.5781	-41.8937		-45.2969
																																								-51.2313	-54.45		-49.2781	-53.2156		-37.6063	-41.8906		-45.2812
																																								-51.2313	-54.45		-49.2781	-53.2156		-37.6063	-41.8906		-45.2812
																																								-51.1437	-54.425		-49.4562	-53.3187		-37.6625	-41.9156		-45.2406
																																								-51.1437	-54.425		-49.4562	-53.3187		-37.6625	-41.9156		-45.2406
																																								-51.0875	-54.3875		-49.5344	-53.3375		-37.6781	-41.9688		-45.3687
																																								-51.0875	-54.3875		-49.5344	-53.3375		-37.6781	-41.9688		-45.3687
																																								-51.1656	-54.1531		-49.7188	-53.5		-37.7531	-42.0719		-45.2094
																																								-51.1656	-54.1531		-49.7188	-53.5		-37.7531	-42.0719		-45.2094
																																								-51.1375	-54.1781		-49.7281	-53.3844		-37.5594	-41.9969		-45.3563
																																								-51.1375	-54.1781		-49.7281	-53.3844		-37.5594	-41.9969		-45.3563
																																								-51.025	-54.0438		-49.5562	-53.2		-37.4562	-41.875		-45.3531
																																								-51.025	-54.0438		-49.5562	-53.2		-37.4562	-41.875		-45.3531
																																								-50.9437	-54.1094		-49.6	-53.1719		-37.4156	-41.8375		-45.3406
																																								-50.9437	-54.1094		-49.6	-53.1719		-37.4156	-41.8375		-45.3406
																																								-39.0281	-45.7094		-37.625	-44.7156		-20.9094	-26.6187		-45.5219
																																								-39.0281	-45.7094		-37.625	-44.7156		-20.9094	-26.6187		-45.5219
																																								-39.2219	-43.0281		-37.45	-41.8406		-24.725	-26.5406		-57.3844
																																								-39.2219	-43.0281		-37.45	-41.8406		-24.725	-26.5406		-57.3844
																																								-48.0375	-50.2062		-46.2125	-49.0219		-32.3781	-38.0562		-57.1344
																																								-48.0375	-50.2062		-46.2125	-49.0219		-32.3781	-38.0562		-57.1344
																																								-51.5562	-54.4688		-50.1	-53.3594		-34.8844	-42.1688		-51.7406
																																								-51.5562	-54.4688		-50.1	-53.3594		-34.8844	-42.1688		-51.7406
																																								-53.3406	-56.6		-51.8	-55.3469		-37.1812	-43.6406		-47.25
																																								-53.3406	-56.6		-51.8	-55.3469		-37.1812	-43.6406		-47.25
																																								-68.2344	-68.1		-66.7687	-66.9281		-57.8937	-62.5438		-34.6656
																																								-68.2344	-68.1		-66.7687	-66.9281		-57.8937	-62.5438		-34.6656
																																								-65.9812	-67.7312		-64.6656	-66.7562		-53.0875	-59.7781		-27.6375
																																								-65.9812	-67.7312		-64.6656	-66.7562		-53.0875	-59.7781		-27.6375
																																								-56.1281	-60.2281		-54.6688	-59.2812		-42.7062	-46.6125		-27.4937
																																								-56.1281	-60.2281		-54.6688	-59.2812		-42.7062	-46.6125		-27.4937
																																								-51.2812	-55.3937		-49.6875	-54.0906		-38.4156	-40.5844		-31.5187
																																								-51.2812	-55.3937		-49.6875	-54.0906		-38.4156	-40.5844		-31.5187
																																								-49.9937	-53.0656		-48.3906	-52.1031		-36.7156	-39.5844		-35.4594
																																								-49.9937	-53.0656		-48.3906	-52.1031		-36.7156	-39.5844		-35.4594
																																								-42.8062	-47.3187		-41.1187	-46.3344		-26.6	-30.5594		-41.7281
																																								-42.8062	-47.3187		-41.1187	-46.3344		-26.6	-30.5594		-41.7281
																																								-45.7094	-48.85		-43.8625	-47.8844		-31.0375	-34.2		-45.4875
																																								-45.7094	-48.85		-43.8625	-47.8844		-31.0375	-34.2		-45.4875
																																								-50.2562	-52.5281		-48.5844	-51.3312		-36.1562	-40.6875		-46.1437
																																								-50.2562	-52.5281		-48.5844	-51.3312		-36.1562	-40.6875		-46.1437
																																								-51.9156	-54.3469		-50.2375	-52.8406		-37.7812	-42.8844		-45.8937
																																								-51.9156	-54.3469		-50.2375	-52.8406		-37.7812	-42.8844		-45.8937
																																								-51.85	-54.5156		-50.2406	-53.3406		-38.0031	-42.5594		-45.6594
																																								-51.85	-54.5156		-50.2406	-53.3406		-38.0031	-42.5594		-45.6594
																																								-51.7062	-54.5094		-50.1625	-53.5281		-37.9062	-42.1375		-45.5875
																																								-51.7062	-54.5094		-50.1625	-53.5281		-37.9062	-42.1375		-45.5875
																																								-51.6781	-54.6063		-50.0438	-53.8094		-37.8	-42.1094		-45.4031
																																								-51.6781	-54.6063		-50.0438	-53.8094		-37.8	-42.1094		-45.4031
																																								-51.6719	-54.85		-50.0344	-53.6187		-37.7969	-42.0938		-45.3625
																																								-51.6719	-54.85		-50.0344	-53.6187		-37.7969	-42.0938		-45.3625
																																								-51.75	-54.6812		-50.1	-53.5594		-37.8687	-41.9562		-45.2938
																																								-51.75	-54.6812		-50.1	-53.5594		-37.8687	-41.9562		-45.2938
																																								-51.8656	-54.5438		-50.05	-53.3687		-37.6969	-41.8		-45.4
																																								-51.8656	-54.5438		-50.05	-53.3687		-37.6969	-41.8		-45.4
																																								-51.8344	-54.45		-49.9125	-53.4		-37.625	-41.7062		-45.3438
																																								-51.8344	-54.45		-49.9125	-53.4		-37.625	-41.7062		-45.3438
																																								-51.7344	-54.4125		-49.8125	-53.5		-37.5812	-41.7313		-45.3312
																																								-51.7344	-54.4125		-49.8125	-53.5		-37.5812	-41.7313		-45.3312
																																								-51.5781	-54.3937		-50.0094	-53.5375		-37.5	-41.7625		-45.2375
																																								-51.5781	-54.3937		-50.0094	-53.5375		-37.5	-41.7625		-45.2375
																																								-51.6812	-54.3875		-50.2437	-53.5812		-37.4844	-41.6219		-45.3
																																								-51.6812	-54.3875		-50.2437	-53.5812		-37.4844	-41.6219		-45.3
																																								-51.5625	-54.4906		-50.2219	-53.6781		-37.425	-41.6063		-45.3094
																																								-51.5625	-54.4906		-50.2219	-53.6781		-37.425	-41.6063		-45.3094
																																								-51.6406	-54.5219		-50.0656	-53.7812		-37.5094	-41.8031		-45.5156
																																								-51.6406	-54.5219		-50.0656	-53.7812		-37.5094	-41.8031		-45.5156
																																								-51.5969	-54.5719		-50.05	-53.7594		-37.5938	-41.8563		-45.5
																																								-51.5969	-54.5719		-50.05	-53.7594		-37.5938	-41.8563		-45.5
																																								-51.6562	-54.2875		-50	-53.6375		-37.4625	-41.8094		-45.2938
																																								-51.6562	-54.2875		-50	-53.6375		-37.4625	-41.8094		-45.2938
																																								-51.5094	-54.2531		-49.8812	-53.5875		-37.4937	-41.9813		-45.4656
																																								-51.5094	-54.2531		-49.8812	-53.5875		-37.4937	-41.9813		-45.4656
																																								-51.6312	-54.3812		-49.9781	-53.7781		-37.525	-41.9031		-45.4594
																																								-51.6312	-54.3812		-49.9781	-53.7781		-37.525	-41.9031		-45.4594
																																								-51.8094	-54.2594		-49.9813	-53.8969		-37.5625	-41.75		-45.4312
																																								-51.8094	-54.2594		-49.9813	-53.8969		-37.5625	-41.75		-45.4312
																																								-51.7625	-54.4		-49.9625	-53.8969		-37.5562	-41.8		-45.5
																																								-51.7625	-54.4		-49.9625	-53.8969		-37.5562	-41.8		-45.5
																																								-51.7031	-54.4312		-49.9094	-53.7594		-37.5281	-41.8563		-45.6094
																																								-51.7031	-54.4312		-49.9094	-53.7594		-37.5281	-41.8563		-45.6094
																																								-51.9656	-54.5156		-50.025	-53.6		-37.425	-41.7719		-45.65
																																								-51.9656	-54.5156		-50.025	-53.6		-37.425	-41.7719		-45.65
																																								-51.9094	-54.4312		-50.1812	-53.5312		-37.4969	-41.7687		-45.7188
																																								-51.9094	-54.4312		-50.1812	-53.5312		-37.4969	-41.7687		-45.7188
																																								-51.7281	-54.3969		-50.0969	-53.5812		-37.4531	-41.8		-45.6625
																																								-51.7281	-54.3969		-50.0969	-53.5812		-37.4531	-41.8		-45.6625
																																								-51.8469	-54.3844		-49.9344	-53.6688		-37.35	-41.8		-45.7906
																																								-51.8469	-54.3844		-49.9344	-53.6688		-37.35	-41.8		-45.7906
																																								-51.7281	-54.4437		-50.05	-53.6375		-37.25	-41.9469		-45.7125
																																								-51.7281	-54.4437		-50.05	-53.6375		-37.25	-41.9469		-45.7125
																																								-51.8031	-54.4719		-49.9531	-53.8156		-37.1625	-41.7406		-45.7375
																																								-51.8031	-54.4719		-49.9531	-53.8156		-37.1625	-41.7406		-45.7375
																																								-51.8406	-54.6969		-49.9969	-53.9344		-37.3469	-41.5625		-45.6906
																																								-51.8406	-54.6969		-49.9969	-53.9344		-37.3469	-41.5625		-45.6906
																																								-51.7656	-54.8		-49.9719	-53.8187		-37.2531	-41.5656		-45.7094
																																								-51.7656	-54.8		-49.9719	-53.8187		-37.2531	-41.5656		-45.7094
																																								-51.7844	-54.7188		-49.9719	-53.7469		-37.3687	-41.4469		-45.8625
																																								-51.7844	-54.7188		-49.9719	-53.7469		-37.3687	-41.4469		-45.8625
																																								-51.9312	-54.9		-49.9906	-53.5781		-37.2875	-41.5812		-45.85
																																								-51.9312	-54.9		-49.9906	-53.5781		-37.2875	-41.5812		-45.85
																																								-52.0906	-54.8		-50.05	-53.7719		-37.2344	-41.5219		-45.7375
																																								-52.0906	-54.8		-50.05	-53.7719		-37.2344	-41.5219		-45.7375
																																								-51.9406	-54.75		-49.9813	-53.6562		-37.1562	-41.4937		-45.8094
																																								-51.9406	-54.75		-49.9813	-53.6562		-37.1562	-41.4937		-45.8094
																																								-51.9	-54.6844		-50.1562	-53.6906		-37.0594	-41.6969		-45.8031
																																								-51.9	-54.6844		-50.1562	-53.6906		-37.0594	-41.6969		-45.8031
																																								-51.9125	-54.7062		-50.2062	-53.8719		-37.1344	-41.9125		-45.7812
																																								-51.9125	-54.7062		-50.2062	-53.8719		-37.1344	-41.9125		-45.7812
																																								-52.0406	-54.6875		-50.1937	-53.9813		-37.1094	-41.7687		-45.7687
																																								-52.0406	-54.6875		-50.1937	-53.9813		-37.1094	-41.7687		-45.7687
																																								-51.75	-54.8156		-50.1937	-53.8812		-37.0938	-41.5156		-45.8094
																																								-51.75	-54.8156		-50.1937	-53.8812		-37.0938	-41.5156		-45.8094
																																								-51.95	-54.7406		-50.2625	-53.9875		-37.1562	-41.5844		-45.975
																																								-51.95	-54.7406		-50.2625	-53.9875		-37.1562	-41.5844		-45.975
																																								-52.2094	-54.5187		-50.0938	-54.0375		-37.1875	-41.5094		-45.9156
																																								-52.2094	-54.5187		-50.0938	-54.0375		-37.1875	-41.5094		-45.9156
																																								-52.1531	-54.4719		-50.1281	-53.9656		-37.1625	-41.5094		-45.9531
																																								-52.1531	-54.4719		-50.1281	-53.9656		-37.1625	-41.5094		-45.9531
																																								-51.9844	-54.4219		-50.075	-53.9531		-36.9844	-41.3187		-45.9937
																																								-51.9844	-54.4219		-50.075	-53.9531		-36.9844	-41.3187		-45.9937
																																								-52	-54.5344		-50.1844	-53.9312		-36.9094	-41.4688		-45.9437
																																								-52	-54.5344		-50.1844	-53.9312		-36.9094	-41.4688		-45.9437
																																								-52.0531	-54.6063		-50.3219	-54.0719		-37.2	-41.3906		-45.975
																																								-52.0531	-54.6063		-50.3219	-54.0719		-37.2	-41.3906		-45.975
																																								-52.05	-54.5406		-50.4	-54.1406		-37.0406	-41.55		-45.9
																																								-52.05	-54.5406		-50.4	-54.1406		-37.0406	-41.55		-45.9
																																								-52	-54.6187		-50.1469	-54.0281		-36.9125	-41.4		-45.8687
																																								-52	-54.6187		-50.1469	-54.0281		-36.9125	-41.4		-45.8687
																																								-52.05	-54.4531		-50.1812	-53.9781		-36.9437	-41.3656		-45.95
																																								-52.05	-54.4531		-50.1812	-53.9781		-36.9437	-41.3656		-45.95
																																								-52.05	-54.35		-50.1406	-54.0344		-37.0375	-41.425		-45.9937
																																								-52.05	-54.35		-50.1406	-54.0344		-37.0375	-41.425		-45.9937
																																								-51.9594	-54.3375		-49.9688	-54.0562		-36.8875	-41.3812		-46.0656
																																								-51.9594	-54.3375		-49.9688	-54.0562		-36.8875	-41.3812		-46.0656
																																								-51.8969	-54.4375		-49.9656	-54.0781		-37.0375	-41.3875		-46.0687
																																								-51.8969	-54.4375		-49.9656	-54.0781		-37.0375	-41.3875		-46.0687
																																								-51.8375	-54.4937		-50.0625	-54.0406		-36.8937	-41.3062		-46.0906
																																								-51.8375	-54.4937		-50.0625	-54.0406		-36.8937	-41.3062		-46.0906
																																								-51.9781	-54.4937		-50.1531	-53.9906		-36.9281	-41.3906		-46.125
																																								-51.9781	-54.4937		-50.1531	-53.9906		-36.9281	-41.3906		-46.125
																																								-52.025	-54.4062		-50.2562	-53.8		-37.0062	-41.35		-46.1656
																																								-52.025	-54.4062		-50.2562	-53.8		-37.0062	-41.35		-46.1656
																																								-51.7625	-54.5656		-50.425	-53.9125		-36.9375	-41.4375		-46.05
																																								-51.7625	-54.5656		-50.425	-53.9125		-36.9375	-41.4375		-46.05
																																								-51.5531	-54.5187		-50.275	-53.8656		-36.9375	-41.4719		-45.8875
																																								-51.5531	-54.5187		-50.275	-53.8656		-36.9375	-41.4719		-45.8875
																																								-51.6312	-54.5125		-50.1844	-53.5344		-37.0062	-41.3719		-45.9875
																																								-51.6312	-54.5125		-50.1844	-53.5344		-37.0062	-41.3719		-45.9875
																																								-51.4188	-54.6594		-50.3	-53.2625		-36.9094	-41.1656		-46.0406
																																								-51.4188	-54.6594		-50.3	-53.2625		-36.9094	-41.1656		-46.0406
																																								-51.2	-54.5656		-50.4281	-53.275		-36.9062	-41.3281		-46.2
																																								-51.2	-54.5656		-50.4281	-53.275		-36.9062	-41.3281		-46.2
																																								-50.8719	-54.3656		-50.2125	-53.0031		-37.0062	-41.4219		-46.0687
																																								-50.8719	-54.3656		-50.2125	-53.0031		-37.0062	-41.4219		-46.0687
																																								-50.7437	-54.425		-50.0656	-52.925		-36.9375	-41.2844		-45.95
																																								-50.7437	-54.425		-50.0656	-52.925		-36.9375	-41.2844		-45.95
																																								-50.3438	-54.5812		-50.2562	-52.7969		-36.8812	-41.2		-46.0312
																																								-50.3438	-54.5812		-50.2562	-52.7969		-36.8812	-41.2		-46.0312
																																								-49.9813	-54.6344		-50.3344	-52.7094		-36.7781	-41.1906		-46
																																								-49.9813	-54.6344		-50.3344	-52.7094		-36.7781	-41.1906		-46
																																								-49.8	-54.6		-50.4156	-52.7875		-36.7156	-41.1656		-46.0406
																																								-49.8	-54.6		-50.4156	-52.7875		-36.7156	-41.1656		-46.0406
																																								-49.5469	-54.6156		-50.3312	-52.5531		-36.775	-41.2375		-45.9937
																																								-49.5469	-54.6156		-50.3312	-52.5531		-36.775	-41.2375		-45.9937
																																								-49.4281	-54.55		-50.3	-52.4156		-36.8719	-41.1969		-46.05
																																								-49.4281	-54.55		-50.3	-52.4156		-36.8719	-41.1969		-46.05
																																								-49.3281	-54.4937		-50.2844	-52.5156		-36.8875	-41.2281		-46.0812
																																								-49.3281	-54.4937		-50.2844	-52.5156		-36.8875	-41.2281		-46.0812
																																								-49.1437	-54.4906		-50.3	-52.3375		-36.875	-41.1281		-45.9906
																																								-49.1437	-54.4906		-50.3	-52.3375		-36.875	-41.1281		-45.9906
																																								-48.8563	-54.45		-50.1094	-52.2562		-36.825	-41		-45.9813
																																								-48.8563	-54.45		-50.1094	-52.2562		-36.825	-41		-45.9813
																																								-48.7687	-54.2344		-50.225	-52.1		-36.7594	-41.1094		-45.9312
																																								-48.7687	-54.2344		-50.225	-52.1		-36.7594	-41.1094		-45.9312
																																								-48.7938	-54.3031		-50.0719	-51.9656		-36.7875	-41.1094		-45.9813
																																								-48.7938	-54.3031		-50.0719	-51.9656		-36.7875	-41.1094		-45.9813
																																								-48.6562	-54.4312		-49.9906	-51.8062		-36.7656	-41.1437		-45.9813
																																								-48.6562	-54.4312		-49.9906	-51.8062		-36.7656	-41.1437		-45.9813
																																								-48.45	-54.4437		-50.1406	-51.8438		-36.725	-41.1844		-46.0156
																																								-48.45	-54.4437		-50.1406	-51.8438		-36.725	-41.1844		-46.0156
																																								-48.15	-54.4625		-50.3	-51.7437		-36.7156	-41.3219		-46.0469
																																								-48.15	-54.4625		-50.3	-51.7437		-36.7156	-41.3219		-46.0469
																																								-48.0156	-54.1844		-50.1906	-51.6375		-36.6844	-41.2562		-46.0656
																																								-48.0156	-54.1844		-50.1906	-51.6375		-36.6844	-41.2562		-46.0656
																																								-47.9813	-54.1375		-50.1156	-51.6937		-36.6812	-40.9688		-45.875
																																								-47.9813	-54.1375		-50.1156	-51.6937		-36.6812	-40.9688		-45.875
																																								-47.8812	-54.2656		-50.0438	-51.5969		-36.575	-40.7719		-45.9281
																																								-47.8812	-54.2656		-50.0438	-51.5969		-36.575	-40.7719		-45.9281
																																								-47.7062	-54.225		-50.0969	-51.5938		-36.5094	-40.875		-45.8
																																								-47.7062	-54.225		-50.0969	-51.5938		-36.5094	-40.875		-45.8
																																								-47.6219	-54.2188		-50.0625	-51.4719		-36.6125	-40.8563		-45.85
																																								-47.6219	-54.2188		-50.0625	-51.4719		-36.6125	-40.8563		-45.85
																																								-47.7031	-54.25		-50.1063	-51.3281		-36.6	-40.8656		-45.875
																																								-47.7031	-54.25		-50.1063	-51.3281		-36.6	-40.8656		-45.875
																																								-47.475	-54.1469		-49.8375	-51.3844		-36.5656	-40.9656		-45.8469
																																								-47.475	-54.1469		-49.8375	-51.3844		-36.5656	-40.9656		-45.8469
																																								-47.4469	-54.1125		-49.7	-51.5156		-36.4844	-40.8844		-45.9375
																																								-47.4469	-54.1125		-49.7	-51.5156		-36.4844	-40.8844		-45.9375
																																								-47.1781	-54.025		-49.8	-51.3781		-36.525	-40.8563		-45.8375
																																								-47.1781	-54.025		-49.8	-51.3781		-36.525	-40.8563		-45.8375
																																								-47.1875	-54		-49.7188	-51.2719		-36.5219	-40.675		-45.7
																																								-47.1875	-54		-49.7188	-51.2719		-36.5219	-40.675		-45.7
																																								-47.125	-54.0719		-49.6562	-51.3625		-36.475	-40.9094		-45.65
																																								-47.125	-54.0719		-49.6562	-51.3625		-36.475	-40.9094		-45.65
																																								-47.0094	-54.1281		-49.55	-51.2906		-36.4594	-40.7844		-45.65
																																								-47.0094	-54.1281		-49.55	-51.2906		-36.4594	-40.7844		-45.65
																																								-47.0125	-54.0312		-49.5312	-51.1875		-36.4469	-40.6156		-45.6156
																																								-47.0125	-54.0312		-49.5312	-51.1875		-36.4469	-40.6156		-45.6156
																																								-46.925	-54.15		-49.45	-51.1219		-36.3312	-40.7188		-45.7188
																																								-46.925	-54.15		-49.45	-51.1219		-36.3312	-40.7188		-45.7188
																																								-46.7719	-53.8969		-49.325	-51.0125		-36.275	-40.6812		-45.6156
																																								-46.7719	-53.8969		-49.325	-51.0125		-36.275	-40.6812		-45.6156
																																								-46.75	-53.85		-49.4156	-51.1094		-36.1969	-40.6375		-45.6156
																																								-46.75	-53.85		-49.4156	-51.1094		-36.1969	-40.6375		-45.6156
																																								-46.8	-53.8687		-49.3875	-51.3344		-36.3125	-40.55		-45.6531
																																								-46.8	-53.8687		-49.3875	-51.3344		-36.3125	-40.55		-45.6531
																																								-46.7625	-53.8687		-49.2687	-51.3469		-36.3	-40.5438		-45.5219
																																								-46.7625	-53.8687		-49.2687	-51.3469		-36.3	-40.5438		-45.5219
																																								-46.4688	-53.7125		-49.1656	-51.2844		-36.2281	-40.5		-45.55
																																								-46.4688	-53.7125		-49.1656	-51.2844		-36.2281	-40.5		-45.55
																																								-46.3812	-53.6906		-49.375	-51.1656		-36.2406	-40.3781		-45.5
																																								-46.3812	-53.6906		-49.375	-51.1656		-36.2406	-40.3781		-45.5
																																								-46.4062	-53.5875		-49.3281	-51.0969		-36.0719	-40.3812		-45.5687
																																								-46.4062	-53.5875		-49.3281	-51.0969		-36.0719	-40.3812		-45.5687
																																								-46.2062	-53.6969		-49.325	-51.0156		-36.0375	-40.4781		-45.4406
																																								-46.2062	-53.6969		-49.325	-51.0156		-36.0375	-40.4781		-45.4406
																																								-46.4219	-53.6344		-49.1844	-50.8844		-36.025	-40.4531		-45.4937
																																								-46.4219	-53.6344		-49.1844	-50.8844		-36.025	-40.4531		-45.4937
																																								-46.4344	-53.6031		-49.1656	-50.9		-36.0031	-40.2781		-45.2719
																																								-46.4344	-53.6031		-49.1656	-50.9		-36.0031	-40.2781		-45.2719
																																								-46.3312	-53.4656		-49.1	-51.0469		-35.9906	-40.2188		-45.2031
																																								-46.3312	-53.4656		-49.1	-51.0469		-35.9906	-40.2188		-45.2031
																																								-46.225	-53.5562		-49.0469	-51.2		-35.8625	-40.275		-45.2219
																																								-46.225	-53.5562		-49.0469	-51.2		-35.8625	-40.275		-45.2219
																																								-46.0094	-53.4469		-49.0781	-51.0187		-35.7406	-39.9437		-45.2812
																																								-46.0094	-53.4469		-49.0781	-51.0187		-35.7406	-39.9437		-45.2812
																																								-45.8937	-53.4062		-49.0469	-50.875		-35.8594	-40.3		-45.2031
																																								-45.8937	-53.4062		-49.0469	-50.875		-35.8594	-40.3		-45.2031
																																								-45.9531	-53.3312		-48.9156	-50.8844		-35.9281	-40.25		-45.0781
																																								-45.9531	-53.3312		-48.9156	-50.8844		-35.9281	-40.25		-45.0781
																																								-45.8656	-53.2156		-48.9	-50.8656		-35.8469	-40.0844		-44.9781
																																								-45.8656	-53.2156		-48.9	-50.8656		-35.8469	-40.0844		-44.9781
																																								-45.85	-53.1344		-48.8969	-51.0656		-35.75	-39.9344		-44.9844
																																								-45.85	-53.1344		-48.8969	-51.0656		-35.75	-39.9344		-44.9844
																																								-45.8969	-53.1969		-48.95	-50.9125		-35.6031	-39.9625		-44.9094
																																								-45.8969	-53.1969		-48.95	-50.9125		-35.6031	-39.9625		-44.9094
																																								-45.8625	-53.2062		-48.85	-50.9312		-35.675	-39.9437		-45.1063
																																								-45.8625	-53.2062		-48.85	-50.9312		-35.675	-39.9437		-45.1063
																																								-45.9156	-53.1562		-48.9937	-50.85		-35.7531	-40.0406		-45.05
																																								-45.9156	-53.1562		-48.9937	-50.85		-35.7531	-40.0406		-45.05
																																								-45.825	-53		-48.9156	-50.7188		-35.7281	-39.9656		-44.9
																																								-45.825	-53		-48.9156	-50.7188		-35.7281	-39.9656		-44.9
																																								-45.75	-52.9469		-48.9375	-50.7562		-35.6281	-39.8187		-44.9031
																																								-45.75	-52.9469		-48.9375	-50.7562		-35.6281	-39.8187		-44.9031
																																								-45.9562	-52.9281		-48.8438	-50.775		-35.6906	-39.6187		-44.925
																																								-45.9562	-52.9281		-48.8438	-50.775		-35.6906	-39.6187		-44.925
																																								-45.7812	-52.95		-48.9656	-50.6437		-35.6688	-39.65		-44.7906
																																								-45.7812	-52.95		-48.9656	-50.6437		-35.6688	-39.65		-44.7906
																																								-45.7125	-52.8625		-48.7375	-50.6437		-35.5938	-39.7219		-44.7
																																								-45.7125	-52.8625		-48.7375	-50.6437		-35.5938	-39.7219		-44.7
																																								-45.6406	-52.6781		-48.8094	-50.85		-35.45	-39.6156		-44.6656
																																								-45.6406	-52.6781		-48.8094	-50.85		-35.45	-39.6156		-44.6656
																																								-45.6281	-52.6937		-48.8781	-50.6531		-35.5344	-39.6312		-44.6344
																																								-45.6281	-52.6937		-48.8781	-50.6531		-35.5344	-39.6312		-44.6344
																																								-45.5969	-52.6688		-48.7594	-50.5812		-35.6406	-39.6969		-44.65
																																								-45.5969	-52.6688		-48.7594	-50.5812		-35.6406	-39.6969		-44.65
																																								-45.725	-52.7094		-48.7437	-50.6063		-35.65	-39.8344		-44.8281
																																								-45.725	-52.7094		-48.7437	-50.6063		-35.65	-39.8344		-44.8281
																																								-45.7719	-52.5687		-48.9813	-50.4594		-35.5344	-39.6187		-44.6656
																																								-45.7719	-52.5687		-48.9813	-50.4594		-35.5344	-39.6187		-44.6656
																																								-45.7281	-52.6156		-48.8625	-50.425		-35.4437	-39.4531		-44.4906
[truncated: 3,252 more rows]
[truncated: 7 more columns]

## Sheet: Figure 2S3
From top to bottom	Left	V	dV/dt	V	dV/dt	V	dV/dt	V	dV/dt	Right	V	dV/dt	V	dV/dt	V	dV/dt	V	dV/dt	V	dV/dt
Artifacts are truncated in some figures		-64.75	-0.117111	-64.5437	0.0835419	-57.3812	-0.335217	-61.95	0.0445366		-65.95	0.113297	-67.6375	-0.0417709	-67.3063	-0.144386	-66.75	0.0459671	-67.0156	0.287437
		-64.75	-0.11673	-64.5437	0.0864029	-57.3812	-0.348568	-61.95	0.0547409		-65.95	0.088501	-67.6375	-0.0377655	-67.3063	-0.153351	-66.75	0.0686646	-67.0156	0.291061
		-64.675	-0.118828	-64.5531	0.0873566	-57.3125	-0.354481	-61.9188	0.0618935		-65.9	0.0602722	-67.5219	-0.0312805	-67.3875	-0.158691	-66.9281	0.0925064	-66.9938	0.290489
		-64.675	-0.122452	-64.5531	0.0867844	-57.3125	-0.353241	-61.9188	0.0659943		-65.9	0.0293732	-67.5219	-0.0230789	-67.3875	-0.159454	-66.9281	0.117493	-66.9938	0.286102
		-64.6281	-0.126839	-64.4969	0.0850677	-57.5094	-0.344372	-61.7656	0.0667572		-65.9219	-0.00247955	-67.7125	-0.0141144	-67.45	-0.15564	-66.95	0.14286	-67.1625	0.278091
		-64.6281	-0.13237	-64.4969	0.0823975	-57.5094	-0.328159	-61.7656	0.065136		-65.9219	-0.0347137	-67.7125	-0.00419617	-67.45	-0.14801	-66.95	0.168037	-67.1625	0.265694
		-64.6625	-0.138664	-64.575	0.078392	-57.5812	-0.304794	-61.925	0.0617981		-65.9938	-0.0663757	-67.6719	0.00591278	-67.3562	-0.136185	-67.05	0.192261	-67.0938	0.2491
		-64.6625	-0.145149	-64.575	0.0743866	-57.5812	-0.274563	-61.925	0.0565529		-65.9938	-0.0967026	-67.6719	0.0154495	-67.3562	-0.120163	-67.05	0.214577	-67.0938	0.228691
		-64.55	-0.151062	-64.475	0.0707626	-57.4531	-0.237751	-61.6969	0.0504494		-66.0031	-0.125313	-67.4375	0.0242233	-67.3719	-0.100899	-67.0656	0.23365	-67.1312	0.204468
		-64.55	-0.155449	-64.475	0.0677109	-57.4531	-0.194931	-61.6969	0.0441551		-66.0031	-0.150871	-67.4375	0.031662	-67.3719	-0.0787735	-67.0656	0.249672	-67.1312	0.17662
		-64.6031	-0.158882	-64.5125	0.0654221	-57.4531	-0.146294	-61.9062	0.0374794		-66.0031	-0.172043	-67.4437	0.0371933	-67.2562	-0.0547409	-66.85	0.261688	-67.1	0.145531
		-64.6031	-0.161362	-64.5125	0.0644684	-57.4531	-0.0926971	-61.9062	0.031662		-66.0031	-0.1894	-67.4437	0.041008	-67.2562	-0.0291824	-66.85	0.268364	-67.1	0.11158
		-64.6875	-0.162125	-64.4031	0.0654221	-57.6187	-0.0354767	-61.9375	0.0271797		-66.0594	-0.20237	-67.5687	0.0427246	-67.2844	-0.00286102	-66.7438	0.26989	-66.9	0.0757217
		-64.6875	-0.160789	-64.4031	0.0682831	-57.6187	0.025177	-61.9375	0.0237465		-66.0594	-0.210762	-67.5687	0.0429153	-67.2844	0.0226974	-66.7438	0.265884	-66.9	0.0392914
		-64.875	-0.157928	-64.5781	0.0732422	-57.5719	0.0880241	-61.95	0.0225067		-66.0625	-0.214577	-67.55	0.0421524	-67.575	0.0473022	-66.6375	0.25692	-66.8	0.00209808
		-64.875	-0.153923	-64.5781	0.0797272	-57.5719	0.151634	-61.95	0.023365		-66.0625	-0.213432	-67.55	0.0394821	-67.575	0.0701904	-66.6375	0.243378	-66.8	-0.0349045
		-64.9031	-0.148964	-64.6875	0.0879288	-57.6312	0.214672	-62	0.0257492		-66.0812	-0.20771	-67.4	0.0356674	-67.475	0.0900269	-66.675	0.225449	-66.85	-0.0701904
		-64.9031	-0.143814	-64.6875	0.0972748	-57.6312	0.276184	-62	0.0300407		-66.0812	-0.197601	-67.4	0.0312805	-67.475	0.106049	-66.675	0.203896	-66.85	-0.102425
		-64.9219	-0.138092	-64.4625	0.107193	-57.5781	0.334835	-61.7687	0.0361443		-66.0156	-0.183487	-67.5875	0.0270844	-67.3562	0.117493	-66.7406	0.179863	-67.0437	-0.131226
		-64.9219	-0.13237	-64.4625	0.117874	-57.5781	0.388908	-61.7687	0.0440598		-66.0156	-0.166321	-67.5875	0.0240326	-67.3562	0.124931	-66.7406	0.154877	-67.0437	-0.156593
		-64.7375	-0.12722	-64.5187	0.128174	-57.4937	0.437737	-61.7875	0.0529289		-66.1219	-0.145912	-67.6219	0.021553	-67.3094	0.128174	-66.7562	0.12989	-67.0531	-0.17662
		-64.7375	-0.122643	-64.5187	0.136757	-57.4937	0.480175	-61.7875	0.062561		-66.1219	-0.123024	-67.6219	0.0200272	-67.3094	0.126076	-66.7562	0.105667	-67.0531	-0.191498
		-64.55	-0.118637	-64.575	0.143051	-57.4531	0.51527	-61.8812	0.0728607		-66.1875	-0.0988007	-67.525	0.0205994	-67.2125	0.119209	-66.6937	0.0829697	-67.0938	-0.201035
		-64.55	-0.114822	-64.575	0.147247	-57.4531	0.542545	-61.8812	0.083065		-66.1875	-0.0730515	-67.525	0.0236511	-67.2125	0.107765	-66.6937	0.063324	-67.0938	-0.204849
		-64.5437	-0.110817	-64.6375	0.148582	-57.5906	0.561523	-61.925	0.0932693		-66.15	-0.0471115	-67.4625	0.028801	-67.2969	0.0923157	-66.7969	0.0471115	-67.1344	-0.203514
		-64.5437	-0.10643	-64.6375	0.146484	-57.5906	0.572205	-61.925	0.102425		-66.15	-0.0213623	-67.4625	0.0368118	-67.2969	0.0736237	-66.7969	0.0343323	-67.1344	-0.197411
		-64.725	-0.10128	-64.4781	0.140572	-57.3281	0.574875	-62.0156	0.110912		-66.05	0.00362396	-67.5344	0.0471115	-67.1844	0.0516891	-66.9094	0.0257492	-67.1969	-0.18692
		-64.725	-0.0951767	-64.4781	0.130844	-57.3281	0.570107	-62.0156	0.11797		-66.05	0.0270844	-67.5344	0.0600815	-67.1844	0.0274658	-66.9094	0.0211716	-67.1969	-0.172806
		-64.85	-0.0871658	-64.4031	0.117683	-57.1187	0.558472	-61.9156	0.123215		-66	0.0484467	-67.5625	0.0759125	-67.25	0.00171661	-66.7562	0.0202179	-67.1406	-0.156212
		-64.85	-0.0764847	-64.4031	0.101089	-57.1187	0.540733	-61.9156	0.127506		-66	0.0671387	-67.5625	0.0940323	-67.25	-0.0249863	-66.7562	0.0225067	-67.1406	-0.137901
		-64.7406	-0.063324	-64.4	0.0816345	-57.2094	0.517941	-61.7969	0.1297		-66.0844	0.0825882	-67.6062	0.114441	-67.3562	-0.0518799	-66.7687	0.0278473	-67.1	-0.118637
		-64.7406	-0.047493	-64.4	0.0602722	-57.2094	0.491428	-61.7969	0.130272		-66.0844	0.0946045	-67.6062	0.136566	-67.3562	-0.078392	-66.7687	0.0352859	-67.1	-0.0995636
		-64.8063	-0.028801	-64.4094	0.0377655	-57.2188	0.462055	-61.8531	0.129509		-66.15	0.103188	-67.5031	0.160408	-67.3906	-0.10376	-66.9281	0.0442505	-67.0125	-0.0814438
		-64.8063	-0.00743866	-64.4094	0.0146866	-57.2188	0.431347	-61.8531	0.127506		-66.15	0.108147	-67.5031	0.184822	-67.3906	-0.127411	-66.9281	0.0543594	-67.0125	-0.0648499
		-64.8531	0.0160217	-64.3625	-0.0082016	-57.3187	0.400257	-61.7219	0.123978		-66.175	0.109291	-67.5406	0.209427	-67.3469	-0.149727	-66.8	0.0640869	-67.0719	-0.0507355
		-64.8531	0.0413895	-64.3625	-0.0299454	-57.3187	0.369453	-61.7219	0.119305		-66.175	0.106621	-67.5406	0.23365	-67.3469	-0.169373	-66.8	0.0736237	-67.0719	-0.0391006
		-64.8906	0.0679016	-64.4906	-0.0495911	-57.3781	0.340652	-61.7313	0.114059		-66.0344	0.100327	-67.4938	0.256538	-67.2281	-0.186729	-66.7375	0.0829697	-67.0969	-0.0307083
		-64.8906	0.0947952	-64.4906	-0.0667572	-57.3781	0.31395	-61.7313	0.108337		-66.0344	0.0911713	-67.4938	0.27771	-67.2281	-0.201797	-66.7375	0.0905991	-67.0969	-0.0253677
		-64.8125	0.121307	-64.4844	-0.0812531	-57.3469	0.289917	-61.9156	0.102425		-66.0344	0.0799179	-67.6656	0.29583	-67.2875	-0.213814	-66.6156	0.0965118	-67.1375	-0.0228882
		-64.8125	0.146484	-64.4844	-0.0919342	-57.3469	0.269413	-61.9156	0.0959396		-66.0344	0.066185	-67.6656	0.310516	-67.2875	-0.223541	-66.6156	0.100899	-67.1375	-0.0236511
		-64.7281	0.170326	-64.575	-0.0993729	-57.2625	0.252438	-61.8312	0.0891685		-65.9313	0.0509262	-67.4375	0.321388	-67.3656	-0.230026	-66.7312	0.103188	-67.0594	-0.0270844
		-64.7281	0.191498	-64.575	-0.10376	-57.2625	0.239277	-61.8312	0.0825882		-65.9313	0.0350952	-67.4375	0.326729	-67.3656	-0.23365	-66.7312	0.104141	-67.0594	-0.0326157
		-64.7625	0.209618	-64.5344	-0.105286	-57.1719	0.229359	-61.8906	0.0758171		-65.8531	0.0190735	-67.4844	0.326347	-67.4531	-0.234413	-66.8594	0.102806	-67.1687	-0.0398636
		-64.7625	0.224495	-64.5344	-0.104523	-57.1719	0.222874	-61.8906	0.0686646		-65.8531	0.00362396	-67.4844	0.320435	-67.4531	-0.232124	-66.8594	0.0995636	-67.1687	-0.0478745
		-64.675	0.235367	-64.4906	-0.101471	-57.1375	0.219727	-61.9344	0.061512		-65.9562	-0.0114441	-67.4469	0.308418	-67.425	-0.227547	-66.8312	0.0955582	-67.0812	-0.056076
		-64.675	0.242615	-64.4906	-0.0976562	-57.1375	0.219059	-61.9344	0.0544548		-65.9562	-0.025177	-67.4469	0.290298	-67.425	-0.219917	-66.8312	0.0894547	-67.0812	-0.0638962
		-64.6281	0.246429	-64.5875	-0.0932693	-57.3062	0.220108	-61.7844	0.0471115		-66.15	-0.0371933	-67.4375	0.266266	-67.4219	-0.209427	-66.7156	0.0823975	-67	-0.0703812
		-64.6281	0.246239	-64.5875	-0.0892639	-57.3062	0.222301	-61.7844	0.0398636		-66.15	-0.047493	-67.4375	0.236702	-67.4219	-0.196457	-66.7156	0.0749588	-67	-0.0753403
		-64.8	0.242615	-64.5219	-0.0860214	-57.3	0.225258	-61.8	0.0329018		-66.1969	-0.0556946	-67.4	0.201607	-67.2531	-0.180817	-66.7	0.0665665	-66.9	-0.0782013
		-64.8	0.236511	-64.5219	-0.0843048	-57.3	0.228024	-61.8	0.026226		-66.1969	-0.062561	-67.4	0.162506	-67.2531	-0.163269	-66.7	0.0583649	-66.9	-0.0778198
		-64.6781	0.227737	-64.5781	-0.0852585	-57.2656	0.229931	-61.7812	0.0202179		-66.2031	-0.0675201	-67.2656	0.120163	-67.2531	-0.144196	-66.7188	0.0499725	-67.1094	-0.0743866
		-64.6781	0.216675	-64.5781	-0.0881195	-57.2656	0.229931	-61.7812	0.0154495		-66.2031	-0.0707626	-67.2656	0.0751495	-67.2531	-0.123787	-66.7188	0.0406265	-67.1094	-0.0677109
		-64.675	0.204277	-64.4375	-0.0936508	-57.25	0.227165	-61.6656	0.0118256		-66.0781	-0.07267	-67.2937	0.0289917	-67.5	-0.102615	-66.75	0.0318527	-67.2406	-0.0579834
		-64.675	0.190544	-64.4375	-0.102043	-57.25	0.221539	-61.6656	0.0100136		-66.0781	-0.0734329	-67.2937	-0.0171661	-67.5	-0.0814438	-66.75	0.0238419	-67.2406	-0.0455856
		-64.5531	0.176048	-64.4125	-0.112534	-57.2188	0.212288	-61.8875	0.0106812		-65.95	-0.0732422	-67.3156	-0.0619888	-67.6	-0.0608444	-66.675	0.0160217	-67.1219	-0.0303268
		-64.5531	0.161552	-64.4125	-0.125313	-57.2188	0.198746	-61.8875	0.0135422		-65.95	-0.071907	-67.3156	-0.105095	-67.6	-0.0413895	-66.675	0.0082016	-67.1219	-0.01297
		-64.7687	0.146675	-64.5531	-0.139999	-57.1844	0.181103	-61.7969	0.0191689		-65.9656	-0.0701904	-67.4656	-0.144768	-67.5687	-0.0240326	-66.7	0	-67.2156	0.00553131
		-64.7687	0.13237	-64.5531	-0.15564	-57.1844	0.158978	-61.7969	0.0276566		-65.9656	-0.0675201	-67.4656	-0.180244	-67.5687	-0.00858307	-66.7	-0.00782013	-67.2156	0.0247955
		-64.7	0.118446	-64.5469	-0.171852	-57.2719	0.133038	-61.8687	0.0390053		-66.0187	-0.0638962	-67.3875	-0.211334	-67.4875	0.00400543	-66.6719	-0.0162125	-67.3063	0.0442505
		-64.7	0.105286	-64.5469	-0.187874	-57.2719	0.103951	-61.8687	0.0528336		-66.0187	-0.0598907	-67.3875	-0.236702	-67.4875	0.0125885	-66.6719	-0.0257492	-67.3063	0.0627518
		-64.5687	0.0928879	-64.4031	-0.203133	-56.9875	0.0720978	-61.8563	0.0686646		-66.0625	-0.0551224	-67.4062	-0.256157	-67.3344	0.0185013	-66.95	-0.0356674	-67.1062	0.0793457
		-64.5687	0.0810623	-64.4031	-0.217247	-56.9875	0.0383377	-61.8563	0.086689		-66.0625	-0.0495911	-67.4062	-0.269699	-67.3344	0.0209808	-66.95	-0.04673	-67.1062	0.0938416
		-64.6156	0.0703812	-64.5594	-0.229263	-57.1625	0.00391006	-61.8969	0.105953		-66.0844	-0.0432968	-67.575	-0.277138	-67.2375	0.0198364	-66.9313	-0.0597	-66.9844	0.106049
		-64.6156	0.0606537	-64.5594	-0.238419	-57.1625	-0.0296593	-61.8969	0.125313		-66.0844	-0.0370026	-67.575	-0.279045	-67.2375	0.0160217	-66.9313	-0.0738144	-66.9844	0.115013
		-64.8125	0.0514984	-64.575	-0.245094	-57.0562	-0.0612259	-61.8312	0.144482		-66.2375	-0.0299454	-67.5187	-0.275803	-67.2687	0.00991821	-66.6125	-0.0890732	-67.075	0.120163
		-64.8125	0.0432968	-64.575	-0.2491	-57.0562	-0.0898361	-61.8312	0.162029		-66.2375	-0.0221252	-67.5187	-0.26722	-67.2687	0.00190735	-66.6125	-0.105858	-67.075	0.121689
		-64.6562	0.0360489	-64.5344	-0.249481	-57.0375	-0.114441	-61.8812	0.17786		-66.1656	-0.0144958	-67.3969	-0.25444	-67.3812	-0.00762939	-66.6	-0.123405	-66.95	0.119781
		-64.6562	0.0291824	-64.5344	-0.247002	-57.0375	-0.133324	-61.8812	0.190926		-66.1656	-0.00667572	-67.3969	-0.237465	-67.3812	-0.0171661	-66.6	-0.141716	-66.95	0.11425
		-64.6375	0.0226974	-64.6031	-0.241852	-57.1781	-0.146198	-61.8312	0.200176		-65.9875	0.000953674	-67.6156	-0.217247	-67.4469	-0.0265121	-66.7	-0.159836	-67.1469	0.105476
		-64.6375	0.0167847	-64.6031	-0.234032	-57.1781	-0.152206	-61.8312	0.205517		-65.9875	0.0082016	-67.6156	-0.19474	-67.4469	-0.0350952	-66.7	-0.17643	-67.1469	0.0934601
		-64.5031	0.0110626	-64.6906	-0.224495	-57.2	-0.151348	-61.8219	0.206566		-66.0625	0.0150681	-67.6031	-0.169945	-67.4094	-0.0421524	-66.6875	-0.191879	-67.175	0.079155
		-64.5031	0.00514984	-64.6906	-0.213242	-57.2	-0.144005	-61.8219	0.202751		-66.0625	0.0207901	-67.6031	-0.143814	-67.4094	-0.0471115	-66.6875	-0.204468	-67.175	0.0621796
		-64.5906	-0.000762939	-64.6562	-0.200081	-57.3156	-0.130081	-61.7344	0.193787		-66.0594	0.0255585	-67.4469	-0.11673	-67.45	-0.0497818	-66.8875	-0.213242	-66.9656	0.0427246
		-64.5906	-0.00667572	-64.6562	-0.186348	-57.3156	-0.110626	-61.7344	0.180721		-66.0594	0.028801	-67.4469	-0.0888824	-67.45	-0.050354	-66.8875	-0.21801	-66.9656	0.0221252
		-64.8781	-0.0137329	-64.65	-0.172806	-57.4406	-0.0867844	-61.6812	0.163364		-66.1437	0.0307083	-67.4594	-0.0606537	-67.4062	-0.0480652	-66.7156	-0.217628	-67.0187	0.00038147
		-64.8781	-0.0211716	-64.65	-0.159073	-57.4406	-0.0595093	-61.6812	0.141907		-66.1437	0.0312805	-67.4594	-0.0326157	-67.4062	-0.0431061	-66.7156	-0.211525	-67.0187	-0.0221252
		-64.8281	-0.028801	-64.5687	-0.145721	-57.3312	-0.0301361	-61.6	0.117397		-65.95	0.0301361	-67.5062	-0.00495911	-67.4313	-0.0358582	-66.7	-0.198746	-67.1594	-0.0452042
		-64.8281	-0.0377655	-64.5687	-0.132942	-57.3312	-0.000190735	-61.6	0.0902176		-65.95	0.028038	-67.5062	0.022316	-67.4313	-0.0270844	-66.7	-0.179863	-67.1594	-0.0684738
		-64.4875	-0.047493	-64.6	-0.121117	-57.2687	0.0289917	-61.7219	0.0608444		-66.05	0.0247955	-67.6062	0.0488281	-67.425	-0.0165939	-66.825	-0.155258	-67.05	-0.091362
		-64.4875	-0.0576019	-64.6	-0.110626	-57.2687	0.0557899	-61.7219	0.0305176		-66.05	0.0196457	-67.6062	0.0741959	-67.425	-0.00495911	-66.825	-0.124359	-67.05	-0.113869
		-64.5281	-0.0680923	-64.5969	-0.100899	-57.3687	0.0789642	-61.7906	0		-66.1375	0.0133514	-67.6469	0.0984192	-67.45	0.00743866	-66.875	-0.0883102	-67.0094	-0.135612
		-64.5281	-0.0793457	-64.5969	-0.0926971	-57.3687	0.0974655	-61.7906	-0.0303268		-66.1375	0.00629425	-67.6469	0.121307	-67.45	0.0202179	-66.875	-0.0484467	-67.0094	-0.156021
		-64.7375	-0.0909805	-64.6281	-0.0854492	-57.0469	0.110722	-61.8438	-0.0598907		-66.1656	-0.00171661	-67.3656	0.142097	-67.425	0.0329971	-66.9719	-0.00476837	-67.1156	-0.174904
		-64.7375	-0.102615	-64.6281	-0.079155	-57.0469	0.117779	-61.8438	-0.087738		-66.1656	-0.00991821	-67.3656	0.16098	-67.425	0.0453949	-66.9719	0.0406265	-67.1156	-0.191879
		-64.6469	-0.113297	-64.5625	-0.0741959	-57.0562	0.11816	-61.675	-0.113583		-66.0156	-0.018692	-67.4719	0.177574	-67.4562	0.056839	-67.0594	0.0858307	-67.0875	-0.207138
		-64.6469	-0.123405	-64.5625	-0.0701904	-57.0562	0.112152	-61.675	-0.137329		-66.0156	-0.0278473	-67.4719	0.191307	-67.4562	0.0682831	-67.0594	0.130653	-67.0875	-0.22049
		-64.7156	-0.132751	-64.7156	-0.0673294	-57.1688	0.099659	-61.7	-0.158215		-65.9938	-0.0371933	-67.4719	0.201797	-67.4562	0.0787735	-66.8562	0.173569	-67.0187	-0.23098
		-64.7156	-0.140762	-64.7156	-0.0656128	-57.1688	0.0809669	-61.7	-0.175762		-65.9938	-0.0463486	-67.4719	0.208855	-67.4562	0.0888824	-66.8562	0.212479	-67.0187	-0.238991
		-64.5344	-0.146866	-64.6344	-0.0652313	-57.1844	0.0566483	-61.8875	-0.190735		-65.9594	-0.0549316	-67.6281	0.212097	-67.35	0.0986099	-66.7531	0.246429	-67.0781	-0.245094
		-64.5344	-0.150871	-64.6344	-0.0658035	-57.1844	0.0274658	-61.8875	-0.202751		-65.9594	-0.0635147	-67.6281	0.211143	-67.35	0.107765	-66.7531	0.274849	-67.0781	-0.248909
		-64.6562	-0.152969	-64.6531	-0.0671387	-57.175	-0.00562668	-61.725	-0.211334		-66.1156	-0.0715256	-67.5687	0.206375	-67.2531	0.11692	-66.75	0.296593	-67.1656	-0.250435
		-64.6562	-0.152588	-64.6531	-0.069809	-57.175	-0.0418663	-61.725	-0.217247		-66.1156	-0.0787735	-67.5687	0.19722	-67.2531	0.125694	-66.75	0.311279	-67.1656	-0.250053
		-64.8531	-0.149727	-64.675	-0.0736237	-57.2531	-0.0804901	-61.7469	-0.220299		-66.1719	-0.0858307	-67.3688	0.183868	-67.35	0.134468	-66.7875	0.319099	-67.2375	-0.248146
		-64.8531	-0.144577	-64.675	-0.0780106	-57.2531	-0.119877	-61.7469	-0.220394		-66.1719	-0.0919342	-67.3688	0.166702	-67.35	0.143433	-66.7875	0.319481	-67.2375	-0.245094
		-64.8063	-0.137138	-64.65	-0.0831604	-57.2094	-0.159168	-61.825	-0.218201		-66.05	-0.0968933	-67.3312	0.146294	-67.5187	0.152779	-66.6312	0.312805	-67.25	-0.24128
		-64.8063	-0.126839	-64.65	-0.0886917	-57.2094	-0.197697	-61.825	-0.213814		-66.05	-0.100517	-67.3312	0.122833	-67.5187	0.161552	-66.6312	0.300217	-67.25	-0.237274
		-64.75	-0.114059	-64.6219	-0.0940323	-57.0344	-0.23365	-61.9188	-0.207329		-66.0594	-0.103188	-67.3469	0.0963211	-67.4875	0.169563	-66.6437	0.282288	-67.1875	-0.232887
		-64.75	-0.0988007	-64.6219	-0.0991821	-57.0344	-0.266647	-61.9188	-0.199032		-66.0594	-0.104332	-67.3469	0.0682831	-67.4875	0.177193	-66.6437	0.259018	-67.1875	-0.22831
		-64.5156	-0.0818253	-64.5	-0.102997	-57.1437	-0.295544	-61.8156	-0.189018		-66.1875	-0.103378	-67.3625	0.0396729	-67.3875	0.183678	-66.775	0.232315	-67.1125	-0.224304
		-64.5156	-0.0629425	-64.5	-0.105286	-57.1437	-0.31929	-61.8156	-0.17767		-66.1875	-0.100517	-67.3625	0.0108719	-67.3875	0.188637	-66.775	0.203705	-67.1125	-0.221252
		-64.7031	-0.0415802	-64.6125	-0.10643	-57.1812	-0.337696	-61.8844	-0.164986		-66.0781	-0.0955582	-67.5	-0.0171661	-67.3281	0.191689	-66.65	0.173569	-67.1156	-0.218582
		-64.7031	-0.0188828	-64.6125	-0.105095	-57.1812	-0.349712	-61.8844	-0.151539		-66.0781	-0.0881195	-67.5	-0.043869	-67.3281	0.192261	-66.65	0.143051	-67.1156	-0.21534
		-64.8312	0.00495911	-64.7	-0.100899	-57.2375	-0.355721	-61.7875	-0.137329		-66.0719	-0.0778198	-67.4156	-0.0680923	-67.3656	0.189781	-66.6937	0.112915	-67.1531	-0.212479
		-64.8312	0.0293732	-64.7	-0.0936508	-57.2375	-0.355339	-61.7875	-0.122261		-66.0719	-0.0646591	-67.4156	-0.0892639	-67.3656	0.18425	-66.6937	0.0846863	-67.1531	-0.209427
		-64.7594	0.0549316	-64.6656	-0.0835419	-57.3344	-0.348186	-61.8281	-0.106621		-66.0125	-0.0482559	-67.3781	-0.107384	-67.325	0.175476	-66.6656	0.0595093	-67.2656	-0.205421
		-64.7594	0.0812531	-64.6656	-0.0703812	-57.3344	-0.335026	-61.8281	-0.0906944		-66.0125	-0.0289917	-67.3781	-0.121498	-67.325	0.163269	-66.6656	0.0368118	-67.2656	-0.200462
		-64.8312	0.106812	-64.6656	-0.0543594	-57.3125	-0.316429	-61.8906	-0.0745773		-65.9938	-0.00705719	-67.4313	-0.131607	-67.4094	0.14782	-66.6125	0.0173569	-67.1719	-0.194168
		-64.8312	0.131798	-64.6656	-0.0356674	-57.3125	-0.292778	-61.8906	-0.0581741		-65.9938	0.0173569	-67.4313	-0.137711	-67.4094	0.128555	-66.6125	0.00228882	-67.1719	-0.185776
		-64.65	0.15583	-64.8031	-0.0146866	-57.275	-0.265121	-61.8969	-0.0413895		-66.2625	0.043869	-67.4594	-0.139999	-67.3219	0.10643	-66.7188	-0.00934601	-67.15	-0.174713
		-64.65	0.178528	-64.8031	0.00801086	-57.275	-0.23489	-61.8969	-0.0246048		-66.2625	0.071907	-67.4594	-0.138855	-67.3219	0.082016	-66.7188	-0.0171661	-67.15	-0.160789
		-64.6344	0.198746	-64.6656	0.031662	-57.5344	-0.202751	-61.875	-0.00762939		-66.2062	0.100708	-67.5594	-0.134468	-67.1281	0.0551224	-66.8	-0.0211716	-67.25	-0.144386
		-64.6344	0.215721	-64.6656	0.0553131	-57.5344	-0.169659	-61.875	0.00934601		-66.2062	0.129509	-67.5594	-0.127411	-67.1281	0.0268936	-66.8	-0.0221252	-67.25	-0.124931
		-64.8	0.230408	-64.7781	0.0787735	-57.5062	-0.136662	-61.7875	0.0259399		-66.2438	0.157356	-67.5875	-0.118256	-67.3312	-0.00152588	-66.8094	-0.0204086	-67.25	-0.102425
		-64.8	0.241089	-64.7781	0.100899	-57.5062	-0.104809	-61.7875	0.0427246		-66.2438	0.183105	-67.5875	-0.107765	-67.3312	-0.0295639	-66.8094	-0.0164032	-67.25	-0.0778198
		-64.7531	0.247383	-64.6969	0.121117	-57.2844	-0.0751495	-61.875	0.0591278		-66.1312	0.206184	-67.4812	-0.0968933	-67.225	-0.0570297	-66.675	-0.0106812	-67.2531	-0.0507355
		-64.7531	0.24929	-64.6969	0.138855	-57.2844	-0.0481606	-61.875	0.0751495		-66.1312	0.226212	-67.4812	-0.0864029	-67.225	-0.0829697	-66.675	-0.0043869	-67.2531	-0.0217438
		-64.6531	0.246239	-64.6	0.153351	-57.3094	-0.0239372	-61.8625	0.0905991		-66.0938	0.242043	-67.4156	-0.0757217	-67.45	-0.106239	-66.7875	0.00267029	-67.3375	0.0082016
		-64.6531	0.238991	-64.6	0.164795	-57.3094	-0.00352859	-61.8625	0.105095		-66.0938	0.253105	-67.4156	-0.0659943	-67.45	-0.125504	-66.7875	0.00953674	-67.3375	0.0385284
		-64.55	0.226593	-64.5938	0.172806	-57.2	0.0134468	-61.8906	0.118637		-66.0594	0.259018	-67.525	-0.0585556	-67.2719	-0.141144	-66.75	0.0156403	-67.2844	0.0684738
		-64.55	0.209236	-64.5938	0.176811	-57.2	0.0270844	-61.8906	0.131226		-66.0594	0.260162	-67.525	-0.0526428	-67.2719	-0.15316	-66.75	0.0207901	-67.2844	0.0976562
		-64.6312	0.187492	-64.6375	0.177002	-57.0875	0.0372887	-61.8438	0.142288		-66	0.256729	-67.5594	-0.0482559	-67.3312	-0.159836	-66.6125	0.0244141	-67.325	0.125313
		-64.6312	0.161552	-64.6375	0.17395	-57.0875	0.0448227	-61.8438	0.151539		-66	0.248337	-67.5594	-0.0459671	-67.3312	-0.161552	-66.6125	0.0265121	-67.325	0.150871
		-64.6875	0.132179	-64.7031	0.168037	-57.3937	0.0494957	-61.8312	0.159359		-65.9625	0.236511	-67.4281	-0.0457764	-67.4156	-0.158501	-66.6937	0.0265121	-67.1969	0.173569
		-64.6875	0.0999451	-64.7031	0.159264	-57.3937	0.052166	-61.8312	0.165367		-65.9625	0.221062	-67.4281	-0.0471115	-67.4156	-0.150299	-66.6937	0.0246048	-67.1969	0.193787
		-64.5563	0.0658035	-64.5625	0.148582	-57.4781	0.0534058	-61.8031	0.1688		-65.9344	0.203133	-67.3781	-0.0495911	-67.3531	-0.137329	-66.7219	0.0207901	-67.2188	0.211334
		-64.5563	0.0301361	-64.5625	0.135803	-57.4781	0.0529289	-61.8031	0.17004		-65.9344	0.184441	-67.3781	-0.0535965	-67.3531	-0.120544	-66.7219	0.0150681	-67.2188	0.225449
		-64.5594	-0.00629425	-64.5062	0.12188	-57.1719	0.051403	-61.8187	0.169373		-65.9062	0.164795	-67.4406	-0.0581741	-67.3812	-0.0999451	-66.6875	0.00743866	-67.075	0.236893
		-64.5594	-0.0419617	-64.5062	0.107765	-57.1719	0.0490189	-61.8187	0.166512		-65.9062	0.145531	-67.4406	-0.062561	-67.3812	-0.0759125	-66.6875	-0.00171661	-67.075	0.245476
		-64.45	-0.0768661	-64.4938	0.0928879	-57.2906	0.0459671	-61.8469	0.161743		-66.0312	0.127029	-67.4562	-0.0669479	-67.4313	-0.0497818	-66.8187	-0.012207	-67.2375	0.25177
		-64.45	-0.109863	-64.4938	0.0778198	-57.2906	0.0423431	-61.8469	0.155258		-66.0312	0.110626	-67.4562	-0.0709534	-67.4313	-0.0225067	-66.8187	-0.0236511	-67.2375	0.255585
		-64.6062	-0.140572	-64.6906	0.063324	-57.45	0.0382423	-61.75	0.147152		-66.025	0.0967026	-67.6312	-0.0741959	-67.5	0.00572205	-66.6	-0.0354767	-67.1344	0.257874
		-64.6062	-0.167847	-64.6906	0.0497818	-57.45	0.0337601	-61.75	0.13752		-66.025	0.0850677	-67.6312	-0.0759125	-67.5	0.0339508	-66.6	-0.0476837	-67.1344	0.258255
		-64.7219	-0.191498	-64.625	0.0370026	-57.3375	0.0285149	-61.7188	0.127029		-66.1344	0.0759125	-67.5563	-0.0759125	-67.4	0.0606537	-66.7594	-0.0598907	-67.1031	0.256348
		-64.7219	-0.211906	-64.625	0.0247955	-57.3375	0.0228882	-61.7188	0.116158		-66.1344	0.0694275	-67.5563	-0.0736237	-67.4	0.0850677	-66.7594	-0.0715256	-67.1031	0.252724
		-64.7687	-0.227547	-64.7188	0.0135422	-57.25	0.0171661	-61.8187	0.104904		-66.0563	0.0656128	-67.4594	-0.0694275	-67.3906	0.107384	-66.5469	-0.0825882	-67.0812	0.247192
		-64.7687	-0.239754	-64.7188	0.0038147	-57.25	0.0113487	-61.8187	0.0940323		-66.0563	0.0638962	-67.4594	-0.0637054	-67.3906	0.126648	-66.5469	-0.0925064	-67.0812	0.239182
		-64.7531	-0.248146	-64.6562	-0.00457764	-57.1969	0.00572205	-61.6937	0.083828		-65.9781	0.0638962	-67.5062	-0.0558853	-67.3719	0.141716	-66.7812	-0.100708	-67.175	0.227737
		-64.7531	-0.251961	-64.6562	-0.0114441	-57.1969	0	-61.6937	0.0741005		-65.9781	0.0650406	-67.5062	-0.0459671	-67.3719	0.15316	-66.7812	-0.107384	-67.175	0.213623
		-64.5719	-0.252914	-64.4688	-0.0173569	-57.2562	-0.00505447	-61.8094	0.0656128		-66.0187	0.0671387	-67.4406	-0.0343323	-67.3531	0.160599	-66.75	-0.112152	-67.3094	0.195503
		-64.5719	-0.250435	-64.4688	-0.021553	-57.2562	-0.00896454	-61.8094	0.0583649		-66.0187	0.069809	-67.4406	-0.021553	-67.3531	0.164032	-66.75	-0.114822	-67.3094	0.172615
		-64.5906	-0.244522	-64.625	-0.0236511	-57.2938	-0.012207	-61.7938	0.0525475		-65.9781	0.0724792	-67.375	-0.00801086	-67.4031	0.16346	-66.7469	-0.115395	-67.3094	0.145531
		-64.5906	-0.236702	-64.625	-0.0238419	-57.2938	-0.0141144	-61.7938	0.0479698		-65.9781	0.0749588	-67.375	0.00591278	-67.4031	0.159836	-66.7469	-0.113297	-67.3094	0.113106
		-64.7094	-0.226593	-64.5031	-0.0219345	-57.2094	-0.0143051	-61.75	0.0445366		-66.1094	0.0772476	-67.6094	0.0200272	-67.2125	0.153351	-66.7625	-0.1091	-66.9656	0.0759125
		-64.7094	-0.214386	-64.5031	-0.0179291	-57.2094	-0.0130653	-61.75	0.0425339		-66.1094	0.0787735	-67.6094	0.0331879	-67.2125	0.144005	-66.7625	-0.103188	-66.9656	0.0339508
		-64.9156	-0.200272	-64.5969	-0.0112534	-57.3438	-0.0101089	-61.8594	0.0415802		-65.9969	0.0797272	-67.725	0.0450134	-67.2562	0.133514	-66.7281	-0.0951767	-67.0563	-0.0118256
		-64.9156	-0.185013	-64.5969	-0.00228882	-57.3438	-0.00610352	-61.8594	0.0411987		-65.9969	0.0804901	-67.725	0.0553131	-67.2562	0.12207	-66.7281	-0.08564	-67.0563	-0.0600815
		-64.7719	-0.1688	-64.5563	0.00915527	-57.3219	-0.00104904	-61.8062	0.0411987		-65.9	0.0802994	-67.6094	0.063324	-67.3344	0.109863	-66.6406	-0.0751495	-67.0094	-0.110626
		-64.7719	-0.151062	-64.5563	0.0225067	-57.3219	0.00514984	-61.8062	0.0413895		-65.9	0.0799179	-67.6094	0.069046	-67.3344	0.0980377	-66.6406	-0.0642776	-67.0094	-0.161362
		-64.6406	-0.132179	-64.8594	0.0377655	-57.4656	0.0117302	-61.7156	0.0413895		-65.7969	0.0793457	-67.4719	0.0720978	-67.2937	0.0869751	-66.8125	-0.053215	-66.9688	-0.21019
		-64.6406	-0.112343	-64.8594	0.0551224	-57.4656	0.0187874	-61.7156	0.0408173		-65.7969	0.0778198	-67.4719	0.0720978	-67.2937	0.0774384	-66.8125	-0.0419617	-66.9688	-0.255585
		-64.6656	-0.0909805	-64.6156	0.0732422	-57.375	0.0255585	-61.7969	0.0390053		-65.9437	0.0762939	-67.4	0.069809	-67.3281	0.0686646	-66.8688	-0.0314713	-66.9594	-0.29583
		-64.6656	-0.0679016	-64.6156	0.091362	-57.375	0.0318527	-61.7969	0.036335		-65.9437	0.0743866	-67.4	0.0650406	-67.3281	0.0608444	-66.8688	-0.0226974	-66.9594	-0.329208
		-64.8375	-0.043869	-64.675	0.109291	-57.3469	0.0378609	-61.775	0.0321388		-66.2156	0.0717163	-67.375	0.0576019	-67.2687	0.0545502	-66.8812	-0.0154495	-67.0125	-0.354004
		-64.8375	-0.0181198	-64.675	0.126648	-57.3469	0.0427246	-61.775	0.0260353		-66.2156	0.0684738	-67.375	0.0488281	-67.2687	0.0492096	-66.8812	-0.00972748	-67.0125	-0.368881
		-64.7438	0.00972748	-64.55	0.142097	-57.1625	0.04673	-61.7625	0.0183105		-66.1875	0.0644684	-67.4594	0.0391006	-67.3875	0.0450134	-66.6625	-0.00572205	-67.1469	-0.373268
		-64.7438	0.0389099	-64.55	0.154686	-57.1625	0.0501633	-61.7625	0.00867844		-66.1875	0.0600815	-67.4594	0.0286102	-67.3875	0.0411987	-66.6625	-0.00419617	-67.1469	-0.366211
		-64.6375	0.0694275	-64.6188	0.164413	-57.1781	0.0529289	-61.7219	-0.00305176		-65.9781	0.0549316	-67.4281	0.0181198	-67.4344	0.0375748	-66.6719	-0.00495911	-67.2594	-0.348282
		-64.6375	0.101662	-64.6188	0.170326	-57.1781	0.0556946	-61.7219	-0.0165939		-65.9781	0.0484467	-67.4281	0.00782013	-67.4344	0.0335693	-66.6719	-0.00724792	-67.2594	-0.320244
		-64.75	0.134659	-64.5563	0.171852	-57.2469	0.0579834	-61.75	-0.031662		-65.9	0.0411987	-67.4	-0.00133514	-67.4	0.0293732	-66.7625	-0.0112534	-67.425	-0.282478
		-64.75	0.167847	-64.5563	0.169182	-57.2469	0.060463	-61.75	-0.0483513		-65.9	0.0331879	-67.4	-0.00915527	-67.4	0.025177	-66.7625	-0.0160217	-67.425	-0.236702
		-64.875	0.201035	-64.6094	0.161362	-57.2594	0.0637054	-61.7906	-0.0664711		-65.7781	0.0244141	-67.5406	-0.015831	-67.35	0.0200272	-66.7219	-0.021553	-67.4437	-0.185013
		-64.875	0.233269	-64.6094	0.148964	-57.2594	0.0677109	-61.7906	-0.0852585		-65.7781	0.0152588	-67.5406	-0.0205994	-67.35	0.0148773	-66.7219	-0.0276566	-67.4437	-0.129318
		-64.75	0.263596	-64.5938	0.132561	-57.3312	0.0729561	-61.7812	-0.104427		-65.875	0.00572205	-67.5938	-0.0234604	-67.1781	0.0104904	-66.6031	-0.0333786	-67.5187	-0.0720978
		-64.75	0.291634	-64.5938	0.112534	-57.3312	0.0794411	-61.7812	-0.124264		-65.875	-0.00419617	-67.5938	-0.0253677	-67.1781	0.00686646	-66.6031	-0.0379562	-67.5187	-0.0154495
		-64.75	0.31662	-64.5625	0.0898361	-57.4125	0.0874519	-61.75	-0.143814		-65.9781	-0.0137329	-67.6188	-0.0261307	-67.1719	0.0043869	-66.7062	-0.0411987	-67.3187	0.0387192
		-64.75	0.33741	-64.5625	0.0648499	-57.4125	0.0967979	-61.75	-0.162125		-65.9781	-0.0228882	-67.6188	-0.0257492	-67.1719	0.0038147	-66.7062	-0.0429153	-67.3187	0.0883102
		-64.75	0.354004	-64.4812	0.0389099	-57.3625	0.107288	-61.7344	-0.179195		-66.025	-0.0318527	-67.575	-0.0247955	-67.2156	0.00686646	-66.8719	-0.0427246	-67.2094	0.131607
		-64.75	0.365448	-64.4812	0.0131607	-57.3625	0.1194	-61.7344	-0.195122		-66.025	-0.0394821	-67.575	-0.0236511	-67.2156	0.0131607	-66.8719	-0.0404358	-67.2094	0.166893
		-64.775	0.371361	-64.4281	-0.0116348	-57.15	0.132751	-61.7	-0.209236		-66.0938	-0.0459671	-67.375	-0.022316	-67.35	0.0226974	-66.85	-0.0358582	-67.0469	0.194168
		-64.775	0.372124	-64.4281	-0.0339508	-57.15	0.146866	-61.7	-0.221062		-66.0938	-0.0520706	-67.375	-0.0211716	-67.35	0.0370026	-66.85	-0.0295639	-67.0469	0.212669
		-64.575	0.367355	-64.35	-0.0528336	-57.3312	0.161648	-61.7812	-0.230885		-66.0875	-0.0566483	-67.4219	-0.0205994	-67.275	0.0558853	-66.75	-0.0209808	-67.0563	0.221634
		-64.575	0.357437	-64.35	-0.0680923	-57.3312	0.17643	-61.7812	-0.238419		-66.0875	-0.0602722	-67.4219	-0.0202179	-67.275	0.0785828	-66.75	-0.0110626	-67.0563	0.222206
		-64.5	0.34256	-64.5687	-0.0785828	-57.4	0.191879	-61.8219	-0.243664		-65.925	-0.062561	-67.4437	-0.0205994	-67.5	0.104523	-66.7812	-0.00038147	-67.1062	0.214577
		-64.5	0.323868	-64.5687	-0.0837326	-57.4	0.20752	-61.8219	-0.246811		-65.925	-0.063324	-67.4437	-0.021553	-67.5	0.133514	-66.7812	0.0110626	-67.1062	0.199699
		-64.4594	0.302124	-64.7	-0.0837326	-57.1625	0.222301	-61.9	-0.247955		-65.9281	-0.0637054	-67.4844	-0.0228882	-67.3688	0.164223	-66.7344	0.0225067	-67.1375	0.178719
		-64.4594	0.277328	-64.7	-0.0785828	-57.1625	0.237083	-61.9	-0.24786		-65.9281	-0.062561	-67.4844	-0.0240326	-67.3688	0.195694	-66.7344	0.0339508	-67.1375	0.152397
		-64.5281	0.250435	-64.6719	-0.069046	-57.1187	0.250721	-61.9594	-0.246716		-65.9219	-0.0600815	-67.5187	-0.0253677	-67.4313	0.226402	-66.7375	0.0444412	-67.1469	0.122261
		-64.5281	0.222778	-64.6719	-0.0553131	-57.1187	0.262928	-61.9594	-0.244713		-65.9219	-0.056839	-67.5187	-0.0270844	-67.4313	0.254631	-66.7375	0.0537872	-67.1469	0.0898361
		-64.5781	0.19474	-64.6906	-0.0379562	-57.2313	0.274181	-61.85	-0.242138		-65.9875	-0.0526428	-67.5125	-0.0282288	-67.4406	0.279236	-66.775	0.0617981	-67.1656	0.0556946
		-64.5781	0.166321	-64.6906	-0.0185013	-57.2313	0.283623	-61.85	-0.239658		-65.9875	-0.047493	-67.5125	-0.0293732	-67.4406	0.298309	-66.775	0.0673294	-67.1656	0.0211716
		-64.6156	0.139046	-64.6687	0.00228882	-57.225	0.290775	-61.8531	-0.237846		-66.0187	-0.0417709	-67.5687	-0.0301361	-67.2906	0.311089	-66.85	0.0709534	-67.2281	-0.01297
		-64.6156	0.112915	-64.6687	0.0232697	-57.225	0.295353	-61.8531	-0.236225		-66.0187	-0.0352859	-67.5687	-0.0305176	-67.2906	0.31662	-66.85	0.0732422	-67.2281	-0.0461578
		-64.7125	0.0881195	-64.675	0.0429153	-57.425	0.296974	-61.7938	-0.235367		-66	-0.028038	-67.5	-0.030899	-67.2	0.314331	-66.7656	0.0734329	-67.1625	-0.0774384
		-64.7125	0.0644684	-64.675	0.0606537	-57.425	0.295162	-61.7938	-0.235271		-66	-0.0205994	-67.5	-0.0305176	-67.2	0.303841	-66.7656	0.0717163	-67.1625	-0.105858
		-64.6531	0.0427246	-64.5187	0.0761032	-57.1469	0.289822	-61.8344	-0.235939		-66.0812	-0.0131607	-67.4938	-0.0303268	-67.2344	0.285149	-66.6844	0.0684738	-67.0969	-0.131035
		-64.6531	0.0232697	-64.5187	0.087738	-57.1469	0.280571	-61.8344	-0.23737		-66.0812	-0.00610352	-67.4938	-0.0307083	-67.2344	0.258636	-66.6844	0.0644684	-67.0969	-0.152969
		-64.6156	0.00495911	-64.4812	0.0947952	-57.3125	0.267029	-61.95	-0.239086		-66.0625	0.000572205	-67.5312	-0.0305176	-67.0687	0.226021	-66.6062	0.0593185	-67.1406	-0.171471
		-64.6156	-0.0116348	-64.4812	0.097847	-57.3125	0.249577	-61.95	-0.241089		-66.0625	0.00667572	-67.5312	-0.0303268	-67.0687	0.188255	-66.6062	0.0535965	-67.1406	-0.186157
		-64.4969	-0.0268936	-64.5781	0.0963211	-57.1031	0.22831	-61.7719	-0.242901		-65.9625	0.0116348	-67.4656	-0.0301361	-67.1062	0.146294	-66.6844	0.0478745	-67.1094	-0.196648
		-64.4969	-0.0402451	-64.5781	0.0900269	-57.1031	0.203323	-61.7719	-0.244141		-65.9625	0.0150681	-67.4656	-0.0293732	-67.1062	0.102234	-66.6844	0.0415802	-67.1094	-0.202942
		-64.4594	-0.0516891	-64.4906	0.0801086	-57.0094	0.174999	-61.875	-0.244522		-66.0031	0.0169754	-67.4844	-0.0291824	-67.15	0.0581741	-66.8	0.0368118	-67.1594	-0.20504
		-64.4594	-0.0617981	-64.4906	0.0659943	-57.0094	0.1441	-61.875	-0.243473		-66.0031	0.0175476	-67.4844	-0.0286102	-67.15	0.0162125	-66.8	0.0326157	-67.1594	-0.203323
		-64.4313	-0.0705719	-64.525	0.0480652	-57.05	0.111389	-61.9844	-0.240898		-65.9125	0.015831	-67.4	-0.0276566	-67.075	-0.0230789	-66.6844	0.0282288	-67.275	-0.197601
		-64.4313	-0.0774384	-64.525	0.0274658	-57.05	0.0774384	-61.9844	-0.236225		-65.9125	0.012207	-67.4	-0.0259399	-67.075	-0.0574112	-66.6844	0.0249863	-67.275	-0.187874
		-64.7281	-0.0827789	-64.5687	0.00476837	-57.075	0.0432014	-61.9937	-0.229263		-66.0844	0.00705719	-67.6188	-0.0228882	-67.2062	-0.0850677	-66.8312	0.0225067	-67.3688	-0.174522
		-64.7281	-0.0873566	-64.5687	-0.0190735	-57.075	0.00982285	-61.9937	-0.219822		-66.0844	0.00038147	-67.6188	-0.0190735	-67.2062	-0.105476	-66.8312	0.0198364	-67.3688	-0.15831
		-64.7438	-0.0904083	-64.5969	-0.0436783	-57.1219	-0.0222206	-61.9844	-0.20771		-65.9344	-0.00743866	-67.6188	-0.0141144	-67.1312	-0.117874	-66.8094	0.0181198	-67.1969	-0.139236
		-64.7438	-0.0928879	-64.5969	-0.0682831	-57.1219	-0.052166	-61.9844	-0.193501		-65.9344	-0.0160217	-67.6188	-0.00782013	-67.1312	-0.12207	-66.8094	0.0171661	-67.1969	-0.117874
		-64.5656	-0.0951767	-64.5469	-0.0919342	-56.975	-0.0794411	-61.85	-0.176239		-66.05	-0.0247955	-67.5031	0	-67.3656	-0.118065	-66.7438	0.015831	-67.1562	-0.0951767
		-64.5656	-0.0974655	-64.5469	-0.114441	-56.975	-0.103474	-61.85	-0.156784		-66.05	-0.0333786	-67.5031	0.00896454	-67.3656	-0.106812	-66.7438	0.0144958	-67.1562	-0.0713348
		-64.5844	-0.100136	-64.375	-0.135231	-57.4	-0.123596	-61.8344	-0.135326		-65.9031	-0.041008	-67.3312	0.0190735	-67.4594	-0.0890732	-66.7469	0.01297	-67.3187	-0.0469208
		-64.5844	-0.10376	-64.375	-0.152779	-57.4	-0.14019	-61.8344	-0.11158		-65.9031	-0.0473022	-67.3312	0.0303268	-67.4594	-0.0658035	-66.7469	0.0110626	-67.3187	-0.0226974
		-64.675	-0.10891	-64.5844	-0.167656	-57.2625	-0.15316	-62.1156	-0.086689		-65.8844	-0.0518799	-67.4313	0.0423431	-67.4125	-0.0377655	-66.575	0.00934601	-67.4125	0.000762939
		-64.675	-0.115204	-64.5844	-0.179482	-57.2625	-0.162411	-62.1156	-0.0606537		-65.8844	-0.0530243	-67.4313	0.0545502	-67.4125	-0.00782013	-66.575	0.00762939	-67.4125	0.0230789
		-64.5812	-0.122643	-64.6906	-0.186539	-57.2031	-0.168324	-62.0344	-0.0340462		-65.9719	-0.050354	-67.65	0.0665665	-67.2781	0.0232697	-66.7438	0.00629425	-67.1625	0.0442505
		-64.5812	-0.131416	-64.6906	-0.189018	-57.2031	-0.171757	-62.0344	-0.00734329		-65.9719	-0.0444412	-67.65	0.079155	-67.2781	0.0553131	-66.7438	0.00648499	-67.1625	0.0637054
		-64.7687	-0.139809	-64.6188	-0.186157	-57.05	-0.173092	-62	0.0183105		-66.0719	-0.0343323	-67.6437	0.0919342	-67.2469	0.0860214	-66.6969	0.00801086	-67.1656	0.0814438
		-64.7687	-0.146484	-64.6188	-0.17662	-57.05	-0.172901	-62	0.0422478		-66.0719	-0.0188828	-67.6437	0.104332	-67.2469	0.115585	-66.6969	0.0118256	-67.1656	0.0980377
		-64.65	-0.149727	-64.5219	-0.159836	-57.2313	-0.172615	-61.9375	0.0640869		-66.1062	0.00324249	-67.625	0.118256	-67.1937	0.143623	-66.7594	0.0198364	-67.2625	0.113869
		-64.65	-0.145912	-64.5219	-0.133896	-57.2313	-0.173473	-61.9375	0.082016		-66.1062	0.0320435	-67.625	0.134468	-67.1937	0.170517	-66.7594	0.0335693	-67.2625	0.129509
		-64.4906	-0.131607	-64.5906	-0.0967026	-57.2188	-0.176525	-61.9312	0.094986		-66.1	0.0686646	-67.5187	0.153732	-67.2719	0.197601	-66.8	0.0543594	-67.1906	0.146675
		-64.4906	-0.102234	-64.5906	-0.0461578	-57.2188	-0.18425	-61.9312	0.101566		-66.1	0.115395	-67.5187	0.178909	-67.2719	0.227737	-66.8	0.084877	-67.1906	0.167084
		-64.3812	-0.0526428	-64.725	0.0204086	-57.2781	-0.199223	-62.0469	0.0998497		-65.9938	0.173759	-67.4094	0.213242	-67.3219	0.263786	-66.7125	0.128174	-67.1562	0.192261
		-64.3812	0.0236511	-64.725	0.107002	-57.2781	-0.224018	-62.0469	0.088501		-65.9938	0.246239	-67.4094	0.259209	-67.3219	0.308037	-66.7125	0.187111	-67.1562	0.225449
		-64.5906	0.133133	-64.6531	0.218201	-57.0938	-0.262547	-61.8812	0.0645638		-66	0.335312	-67.2875	0.321198	-67.1062	0.365639	-66.7219	0.265503	-67.1281	0.270081
		-64.5906	0.281715	-64.6531	0.3582	-57.0938	-0.319767	-61.8812	0.0250816		-66	0.444221	-67.2875	0.403976	-67.1062	0.442123	-66.7219	0.367546	-67.1281	0.329399
		-64.6312	0.476456	-64.6156	0.532913	-57.2531	-0.400639	-61.8875	-0.0325203		-66.0156	0.576019	-67.3312	0.511932	-66.95	0.541496	-66.7687	0.497055	-67.35	0.407219
		-64.6312	0.721931	-64.6156	0.746346	-57.2531	-0.511646	-61.8875	-0.112057		-66.0156	0.734138	-67.3312	0.649834	-66.95	0.66967	-66.7687	0.657272	-67.35	0.507927
		-64.7531	1.02139	-64.6656	1.00384	-57.2406	-0.659847	-61.9656	-0.217247		-66.0125	0.921822	-67.4469	0.822258	-67.1344	0.831604	-66.7188	0.852203	-67.3063	0.634766
		-64.7531	1.37653	-64.6656	1.30997	-57.2406	-0.852585	-61.9656	-0.35181		-66.0125	1.1404	-67.4469	1.03207	-67.1344	1.03073	-66.7188	1.0849	-67.3063	0.790787
		-65.0344	1.78394	-64.6594	1.66664	-57.2125	-1.09768	-61.8406	-0.519562		-65.95	1.39198	-67.6219	1.28098	-67.2812	1.26915	-66.7094	1.35574	-67.075	0.979424
		-65.0344	2.23541	-64.6594	2.075	-57.2125	-1.402	-61.8406	-0.724411		-65.95	1.67618	-67.6219	1.56975	-67.2812	1.548	-66.7094	1.66416	-67.075	1.20049
		-64.8469	2.71778	-64.7125	2.53201	-57.2875	-1.7724	-61.8	-0.968838		-66.0062	1.98956	-67.5094	1.89495	-67.2906	1.86558	-66.7062	2.0071	-67.0875	1.45283
		-64.8469	3.21198	-64.7125	3.03268	-57.2875	-2.213	-61.8	-1.25408		-66.0062	2.32658	-67.5094	2.25105	-67.2906	2.21481	-66.7062	2.37751	-67.0875	1.73378
		-64.65	3.69205	-64.5906	3.56693	-57.1562	-2.72589	-61.9688	-1.58091		-66.0219	2.67944	-67.5437	2.6289	-67.2625	2.58808	-66.8312	2.76642	-67.1687	2.0359
		-64.65	4.12483	-64.5906	4.11968	-57.1562	-3.31001	-61.9688	-1.94778		-66.0219	3.03593	-67.5437	3.01495	-67.2625	2.97203	-66.8312	3.16029	-67.1687	2.34966
		-64.6312	4.47121	-64.5219	4.67186	-57.3062	-3.95899	-61.9	-2.34957		-65.9875	3.37982	-67.5938	3.39203	-67.2781	3.3493	-66.7906	3.54118	-67	2.66113
		-64.6312	4.6875	-64.5219	5.19924	-57.3062	-4.66166	-61.9	-2.77929		-65.9875	3.69244	-67.5938	3.73974	-67.2781	3.69968	-66.7906	3.88908	-67	2.9541
		-64.8719	4.72736	-64.5969	5.6735	-57.3031	-5.40142	-61.8312	-3.22657		-65.8219	3.95164	-67.5062	4.03404	-67.2844	3.99914	-66.7594	4.18034	-67.3	3.20911
		-64.8719	4.54407	-64.5969	6.06241	-57.3031	-6.15463	-61.8312	-3.67718		-65.8219	4.13361	-67.5062	4.24824	-67.2844	4.22134	-66.7594	4.38824	-67.3	3.40347
		-64.7	4.09374	-64.5844	6.33211	-57.2406	-6.89135	-61.8312	-4.11377		-65.8969	4.21276	-67.3688	4.356	-67.1469	4.33884	-66.6656	4.4857	-67.3875	3.51391
		-64.7	3.33929	-64.5844	6.44836	-57.2406	-7.57694	-61.8312	-4.51612		-65.8969	4.16451	-67.3688	4.3314	-67.1469	4.32549	-66.6656	4.44736	-67.3875	3.51696
		-64.7031	2.25496	-64.5187	6.37932	-57.0875	-8.1708	-61.9844	-4.86078		-65.6875	3.96729	-67.4094	4.14963	-67.2375	4.15726	-66.5781	4.24938	-67.3719	3.39127
		-64.7031	0.829601	-64.5187	6.09779	-57.0875	-8.62837	-61.9844	-5.12247		-65.6875	3.60203	-67.4094	3.792	-67.2375	3.81393	-66.5781	3.87325	-67.3719	3.11813
		-64.8625	-0.930119	-64.6813	5.58233	-57.1594	-8.90484	-61.8312	-5.27658		-65.85	3.05691	-67.4781	3.24593	-67.2	3.28274	-66.4812	3.30658	-67.2719	2.68383
		-64.8625	-2.99492	-64.6813	4.82159	-57.1594	-8.95586	-61.8312	-5.29757		-65.85	2.32811	-67.4781	2.5074	-67.2	2.55928	-66.4812	2.54459	-67.2719	2.08244
		-64.8344	-5.31349	-64.5469	3.81556	-57	-8.74004	-62.0062	-5.16243		-66.0844	1.42097	-67.475	1.58253	-67.2	1.64814	-66.5563	1.59416	-67.1312	1.31626
		-64.8344	-7.81155	-64.5469	2.57692	-57	-8.22334	-62.0062	-4.85296		-66.0844	0.351524	-67.475	0.486946	-67.2	0.56591	-66.5563	0.472832	-67.1312	0.396729
		-64.8125	-10.3916	-64.5656	1.13306	-57.0062	-7.38106	-62.0375	-4.35534		-66.1813	-0.853729	-67.3187	-0.750542	-67.1406	-0.659561	-66.7687	-0.791359	-67.35	-0.654602
		-64.8125	-12.9391	-64.5656	-0.475979	-57.0062	-6.2006	-62.0375	-3.66344		-66.1813	-2.15702	-67.3187	-2.09103	-67.1406	-1.98994	-66.7687	-2.15874	-67.35	-1.80569
		-64.7562	-15.3248	-64.3937	-2.19679	-57.1187	-4.68445	-61.8438	-2.77901		-65.8625	-3.51162	-67.2562	-3.48587	-67.0656	-3.37658	-66.6125	-3.57971	-67.3469	-3.01552
		-64.7562	-17.4126	-64.3937	-3.96471	-57.1187	-2.85034	-61.8438	-1.71251		-65.8625	-4.86202	-67.2562	-4.87766	-67.0656	-4.76208	-66.6125	-4.9963	-67.3469	-4.23565
		-36.425	-19.0685	-48.6937	-5.70812	-60.3094	-0.734234	-63.8	-0.484848		-54.3844	-6.14853	-55.2156	-6.2048	-54.8875	-6.08578	-54.3469	-6.3467	-58.5656	-5.41229
		-36.425	-20.1674	-48.6937	-7.35064	-60.3094	1.61161	-63.8	0.873756		-54.3844	-7.3101	-55.2156	-7.40433	-54.8875	-7.28416	-54.3469	-7.56683	-58.5656	-6.48842
		-42.7656	-20.602	-51.4094	-8.81615	-68.0594	4.12016	-68.2094	2.32553		-54.2406	-8.28648	-55.7687	-8.41465	-55.35	-8.29468	-54.7313	-8.59375	-55.7	-7.40795
		-42.7656	-20.2934	-51.4094	-10.0333	-68.0594	6.71015	-68.2094	3.8249		-54.2406	-9.02271	-55.7687	-9.1795	-55.35	-9.06258	-54.7313	-9.37138	-55.7	-8.11958
		-67.9688	-19.1971	-58.9906	-10.9403	-70.25	9.29108	-69.25	5.32026		-62.55	-9.47456	-64.3625	-9.6529	-64.0406	-9.54113	-63.35	-9.85336	-63.1125	-8.57925
		-67.9688	-17.3061	-58.9906	-11.4893	-70.25	11.7671	-69.25	6.75764		-62.55	-9.60941	-64.3625	-9.80282	-64.0406	-9.69696	-63.35	-10.0069	-63.1125	-8.75454
		-77.7312	-14.6568	-61.7375	-11.6485	-68.9656	14.0411	-68.525	8.0821		-65.9656	-9.40914	-67.6437	-9.61132	-67.5062	-9.51271	-66.9313	-9.81426	-67.1937	-8.62522
		-77.7312	-11.3293	-61.7375	-11.4065	-68.9656	16.0205	-68.525	9.24168		-65.9656	-8.87432	-67.6437	-9.07784	-67.5062	-8.98781	-66.9313	-9.27467	-67.1937	-8.18634
		-81.4281	-7.44209	-64.3688	-10.7729	-66.65	17.6224	-67.425	10.1894		-67.8812	-8.02097	-69.4531	-8.22029	-69.1281	-8.13847	-68.7969	-8.40645	-69.1844	-7.44991
		-81.4281	-3.14865	-64.3688	-9.7765	-66.65	18.778	-67.425	10.8865		-67.8812	-6.88286	-69.4531	-7.0734	-69.1281	-6.99978	-68.7969	-7.24525	-69.1844	-6.44341
		-102.4	1.37157	-84.75	-8.46615	-59.2406	19.4364	-62.9844	11.3039		-82.5344	-5.50938	-84.1	-5.68657	-83.7562	-5.6221	-83.5219	-5.84126	-80.6906	-5.20859
		-102.4	5.92308	-84.75	-6.90651	-59.2406	19.5671	-62.9844	11.4246		-82.5344	-3.9608	-84.1	-4.12216	-83.7562	-4.06666	-83.5219	-4.25758	-80.6906	-3.79868
		-102.4	10.3056	-80.4187	-5.17426	-48.6812	19.164	-57.1594	11.2435		-80.4719	-2.3077	-81.9875	-2.45152	-81.5187	-2.40536	-81.4	-2.56653	-80.6625	-2.2768
		-102.4	14.3263	-80.4187	-3.35369	-48.6812	18.2432	-57.1594	10.769		-80.4719	-0.625229	-81.9875	-0.750542	-81.5187	-0.713348	-81.4	-0.845718	-80.6625	-0.711632
		-72.4812	17.8104	-70.2937	-1.53122	-44.5938	16.8427	-54.9719	10.0222		-70.7469	1.01261	-72.2	0.904655	-72.0187	0.933266	-71.7281	0.828552	-73.1687	0.82798
		-72.4812	20.6125	-70.2937	0.209999	-44.5938	15.0218	-54.9719	9.03473		-70.7469	2.53468	-72.2	2.44408	-72.0187	2.46277	-71.7281	2.38495	-73.1687	2.27432
		-54.6656	22.6242	-65.9437	1.79443	-45.1469	12.8557	-55.3125	7.84826		-66.0969	3.87859	-67.625	3.80478	-67.4437	3.81298	-66.9	3.75957	-68.2125	3.56808
		-54.6656	23.7793	-65.9437	3.15838	-45.1469	10.4319	-55.3125	6.51102		-66.0969	4.9942	-67.625	4.93507	-67.4437	4.93202	-66.9	4.90055	-68.2125	4.65927
		-52.4281	24.0578	-64.0125	4.25434	-47.0969	7.84597	-56.1594	5.07536		-64.7062	5.8445	-66.2562	5.79948	-65.8875	5.78365	-65.3125	5.77126	-66.1031	5.51014
		-52.4281	23.4844	-64.0125	5.05199	-47.0969	5.19629	-56.1594	3.59554		-64.7062	6.40831	-66.2562	6.37741	-65.8875	6.34747	-65.3125	6.35185	-66.1031	6.09818
		-37.1156	22.1251	-53.8219	5.53818	-51.1	2.57788	-58.575	2.12421		-57.4875	6.68125	-58.9375	6.66409	-58.6688	6.61831	-58	6.63795	-60.1781	6.41365
		-37.1156	20.0824	-53.8219	5.71861	-51.1	0.0789642	-58.575	0.710869		-57.4875	6.67343	-58.9375	6.67057	-58.6688	6.60763	-58	6.64043	-60.1781	6.46286
		-46.9906	17.4867	-58.3	5.61466	-55.4625	-2.2233	-60.7719	-0.601387		-60.3687	6.4085	-61.7687	6.42147	-61.425	6.33945	-60.8875	6.38523	-61.8	6.26488
		-46.9906	14.4873	-58.3	5.26123	-55.4625	-4.26598	-60.7719	-1.77765		-60.3687	5.92232	-61.7687	5.95226	-61.425	5.84984	-60.8875	5.90839	-61.8	5.85003
		-62.3406	11.242	-63.3187	4.70314	-57.1937	-6.00166	-61.5312	-2.79083		-64.7188	5.25742	-66.1625	5.30643	-65.9375	5.18303	-65.575	5.25513	-65.4125	5.2557
		-62.3406	7.90806	-63.3187	3.99189	-57.1937	-7.4007	-61.5312	-3.62349		-64.7188	4.46205	-66.1625	4.53262	-65.9375	4.38766	-65.575	4.47464	-65.4125	4.52576
		-66.925	4.63371	-65.0969	3.18203	-57.7062	-8.45089	-61.8281	-4.26702		-66.2125	3.58753	-67.7812	3.68023	-67.425	3.51467	-67.05	3.61767	-67.0125	3.7077
		-66.925	1.54896	-65.0969	2.3262	-57.7062	-9.15422	-61.8281	-4.7226		-66.2125	2.68135	-67.7812	2.7977	-67.425	2.61307	-67.05	2.7338	-67.0125	2.84634
		-66.3344	-1.23882	-65.45	1.47419	-57.8312	-9.52835	-62.0219	-4.99811		-66.1875	1.78776	-67.8656	1.92852	-67.4469	1.72729	-67.1625	1.86768	-67.2656	1.98517
		-66.3344	-3.64876	-65.45	0.669098	-57.8312	-9.60207	-62.0219	-5.10759		-66.1875	0.946617	-67.8656	1.11027	-67.4469	0.895691	-67.1625	1.05762	-67.2656	1.16196
		-65.5437	-5.62763	-65.275	-0.0553131	-57.4937	-9.41277	-61.9344	-5.07135		-66.0156	0.187492	-67.7406	0.372887	-67.425	0.148773	-67.0687	0.333595	-67.35	0.406837
		-65.5437	-7.15094	-65.275	-0.674438	-57.4937	-9.00431	-61.9344	-4.91152		-66.0156	-0.467491	-67.7406	-0.262833	-67.425	-0.491524	-67.0687	-0.28286	-67.35	-0.256157
		-65.2312	-8.21953	-65.1062	-1.17207	-57.4125	-8.42247	-61.6437	-4.6524		-66.0406	-1.00307	-67.7406	-0.78392	-67.3844	-1.01166	-66.95	-0.779343	-67.4125	-0.811195
		-65.2312	-8.85582	-65.1062	-1.54152	-57.4125	-7.71475	-61.6437	-4.3189		-66.0406	-1.41411	-67.7406	-1.1858	-67.3844	-1.40686	-66.95	-1.15204	-67.4125	-1.25103
		-65.1437	-9.10101	-65.075	-1.78585	-57.5375	-6.92577	-61.7906	-3.93438		-66.1562	-1.70269	-67.6719	-1.47114	-67.3594	-1.67942	-66.9094	-1.40343	-67.2844	-1.57433
		-65.1437	-9.0086	-65.075	-1.91269	-57.5375	-6.09627	-61.7906	-3.52116		-66.1562	-1.87607	-67.6719	-1.64852	-67.3594	-1.83811	-66.9094	-1.54266	-67.2844	-1.7868
		-65.2125	-8.64	-64.8594	-1.93634	-57.6063	-5.2619	-61.9937	-3.0982		-66.2562	-1.94569	-67.5	-1.72977	-67.4531	-1.8959	-66.8781	-1.58443	-67.4031	-1.89819
		-65.2125	-8.0595	-64.8594	-1.87397	-57.6063	-4.45251	-61.9937	-2.68116		-66.2562	-1.92661	-67.5	-1.72958	-67.4531	-1.86844	-66.8781	-1.54457	-67.4031	-1.92108
		-65.2188	-7.33032	-65.0656	-1.7437	-57.5281	-3.69177	-61.9406	-2.28271		-66.1188	-1.8364	-67.4469	-1.66569	-67.3625	-1.77383	-66.9313	-1.441	-67.3187	-1.87092
		-65.2188	-6.51093	-65.0656	-1.56536	-57.5281	-2.99578	-61.9406	-1.91231		-66.1188	-1.69163	-67.4469	-1.55449	-67.3625	-1.62926	-66.9313	-1.29223	-67.3187	-1.76392
		-65.1719	-5.65395	-64.85	-1.35612	-57.3812	-2.37579	-61.8469	-1.57604		-66.0187	-1.50928	-67.4375	-1.41068	-67.3406	-1.45187	-66.8281	-1.11542	-67.275	-1.61591
		-65.1719	-4.80232	-64.85	-1.13297	-57.3812	-1.83764	-61.8469	-1.27745		-66.0187	-1.30424	-67.4375	-1.24836	-67.3406	-1.25732	-66.8281	-0.925636	-67.275	-1.44081
		-65.0219	-3.98941	-64.8406	-0.909042	-57.3906	-1.38178	-61.8062	-1.01795		-66.1813	-1.0891	-67.4094	-1.07975	-67.4187	-1.0582	-66.7969	-0.736046	-67.3781	-1.25198
		-65.0219	-3.24001	-64.8406	-0.694656	-57.3906	-1.00594	-61.8062	-0.796509		-66.1813	-0.875664	-67.4094	-0.913429	-67.4187	-0.865555	-66.7969	-0.556755	-67.3781	-1.0601
		-65.0719	-2.56977	-64.8281	-0.497818	-57.1562	-0.704479	-61.9656	-0.611019		-66.05	-0.671577	-67.6281	-0.755882	-67.2875	-0.686836	-66.7156	-0.395012	-67.5094	-0.872803
		-65.0719	-1.98708	-64.8281	-0.322723	-57.1562	-0.469971	-61.9656	-0.458622		-66.05	-0.483513	-67.6281	-0.611877	-67.2875	-0.527	-66.7156	-0.255394	-67.5094	-0.697327
		-65.0594	-1.49384	-64.7844	-0.172615	-57.05	-0.294304	-61.775	-0.335503		-66.1	-0.315475	-67.5594	-0.483131	-67.2281	-0.389671	-66.5938	-0.140762	-67.4562	-0.538063
		-65.0594	-1.08624	-64.7844	-0.0478745	-57.05	-0.168228	-61.775	-0.237751		-66.1	-0.1688	-67.5594	-0.370789	-67.2281	-0.275421	-66.5938	-0.0518799	-67.4562	-0.396538
		-65.1437	-0.757027	-64.6437	0.0537872	-57.3594	-0.083065	-61.7437	-0.161457		-66.1906	-0.0453949	-67.4125	-0.274086	-67.1844	-0.183678	-66.6687	0.0125885	-67.3312	-0.274467
		-65.1437	-0.498009	-64.6437	0.133896	-57.3594	-0.0305176	-61.7437	-0.102997		-66.1906	0.0553131	-67.4125	-0.191116	-67.1844	-0.113106	-66.6687	0.0553131	-67.3312	-0.171089
		-65.15	-0.298309	-64.8156	0.195503	-57.2344	-0.00286102	-61.9	-0.0591278		-66.1	0.13485	-67.5781	-0.121307	-67.2	-0.0614166	-66.6344	0.0785828	-67.2406	-0.0846863
		-65.15	-0.146866	-64.8156	0.242424	-57.2344	0.00667572	-61.9	-0.0267982		-66.1	0.194168	-67.5781	-0.0617981	-67.2	-0.0255585	-66.6344	0.0858307	-67.2406	-0.0144958
		-65.0563	-0.0341415	-64.8906	0.276566	-57.2844	0.00391006	-61.95	-0.00324249		-65.9562	0.235748	-67.6	-0.0102997	-67.2875	-0.00228882	-66.6906	0.0804901	-67.1937	0.0417709
		-65.0563	0.0486374	-64.8906	0.301552	-57.2844	-0.00677109	-61.95	0.0137329		-65.9562	0.261688	-67.6	0.0341415	-67.2875	0.0106812	-66.6906	0.0658035	-67.1937	0.0865936
		-64.9219	0.109863	-64.8688	0.320244	-57.4	-0.0213623	-61.9437	0.0256538		-66.0187	0.273705	-67.6562	0.0732422	-67.3	0.0164032	-66.6781	0.0453949	-67.3312	0.12188
		-64.9219	0.156021	-64.8688	0.334167	-57.4	-0.0368118	-61.9437	0.0335693		-66.0187	0.274658	-67.6562	0.108147	-67.3	0.0171661	-66.6781	0.021553	-67.3312	0.149727
		-65.0312	0.192261	-64.7562	0.344849	-57.3844	-0.0510216	-61.7531	0.0388145		-66.0125	0.266457	-67.5938	0.139618	-67.1937	0.0144958	-66.6031	-0.0038147	-67.3375	0.171852
		-65.0312	0.222397	-64.7562	0.353432	-57.3844	-0.062561	-61.7531	0.04282		-66.0125	0.250435	-67.5938	0.168037	-67.1937	0.0104904	-66.6031	-0.028801	-67.3375	0.189209
		-65.075	0.24929	-64.6656	0.360298	-57.35	-0.0701904	-61.8094	0.0459671		-65.9469	0.228882	-67.4688	0.193214	-67.325	0.00572205	-66.6562	-0.0514984	-67.4313	0.203705
		-65.075	0.274467	-64.6656	0.365448	-57.35	-0.0730515	-61.8094	0.048542		-65.9469	0.204277	-67.4688	0.214195	-67.325	0.00133514	-66.6562	-0.0715256	-67.4313	0.216103
		-65.1687	0.298691	-64.8312	0.368881	-57.3156	-0.070858	-61.8	0.0510216		-65.8438	0.177574	-67.5062	0.231934	-67.4187	-0.00209808	-66.85	-0.0881195	-67.3031	0.226974
		-65.1687	0.323105	-64.8312	0.369835	-57.3156	-0.0638008	-61.8	0.0535965		-65.8438	0.150299	-67.5062	0.246239	-67.4187	-0.0043869	-66.85	-0.101089	-67.3031	0.237083
		-65.2312	0.346184	-64.85	0.369072	-57.2156	-0.0515938	-61.7906	0.0567436		-65.7781	0.124168	-67.5062	0.256157	-67.3312	-0.00534058	-66.6875	-0.110435	-67.2937	0.246239
		-65.2312	0.367737	-64.85	0.365639	-57.2156	-0.0342369	-61.7906	0.0603676		-65.7781	0.100517	-67.5062	0.261307	-67.3312	-0.00514984	-66.6875	-0.115776	-67.2937	0.255013
		-65.1	0.387573	-64.7312	0.358772	-57.4	-0.0126839	-61.95	0.0644684		-65.9375	0.0799179	-67.5156	0.261688	-67.15	-0.0038147	-66.8312	-0.117302	-67.25	0.263596
		-65.1	0.404739	-64.7312	0.348473	-57.4	0.0132561	-61.95	0.0691414		-65.9375	0.0627518	-67.5156	0.258064	-67.15	-0.00114441	-66.8312	-0.115776	-67.25	0.271797
		-65.05	0.419044	-64.5625	0.335121	-57.325	0.0427246	-61.8844	0.0743866		-66.0844	0.0505447	-67.4719	0.249863	-67.2531	0.00324249	-66.7687	-0.111008	-67.1875	0.279045
		-65.05	0.428772	-64.5625	0.318718	-57.325	0.0749588	-61.8844	0.0796318		-66.0844	0.043869	-67.4719	0.237846	-67.2531	0.0087738	-66.7687	-0.10376	-67.1875	0.285912
		-64.8781	0.433922	-64.6031	0.2985	-57.3438	0.110054	-61.8219	0.0847816		-66	0.0419617	-67.4594	0.222397	-67.3031	0.0150681	-66.55	-0.0946045	-67.275	0.292015
		-64.8781	0.434494	-64.6031	0.275993	-57.3438	0.146294	-61.8219	0.0900269		-66	0.044632	-67.4594	0.204086	-67.3031	0.0226974	-66.55	-0.0827789	-67.275	0.297356
		-64.8594	0.429916	-64.6562	0.251198	-57.35	0.182724	-61.8	0.0946045		-66.0156	0.0520706	-67.35	0.18425	-67.2094	0.0314713	-66.7531	-0.0701904	-67.2438	0.301361
		-64.8594	0.42038	-64.6562	0.224686	-57.35	0.218678	-61.8	0.0980377		-66.0156	0.0637054	-67.35	0.162697	-67.2094	0.0413895	-66.7531	-0.0564575	-67.2438	0.303459
		-64.8937	0.406265	-64.6	0.197792	-57.5438	0.253105	-61.8844	0.100422		-66.0844	0.078392	-67.45	0.141144	-67.3031	0.0528336	-66.7562	-0.0411987	-67.3375	0.304413
		-64.8937	0.387955	-64.6	0.170898	-57.5438	0.284863	-61.8844	0.101185		-66.0844	0.0959396	-67.45	0.121117	-67.3031	0.0648499	-66.7562	-0.0259399	-67.3375	0.30365
		-64.8156	0.366211	-64.6281	0.144768	-57.3656	0.312519	-61.75	0.100327		-66.05	0.115585	-67.25	0.102806	-67.3594	0.0776291	-66.75	-0.0106812	-67.2625	0.30098
		-64.8156	0.341606	-64.6281	0.120354	-57.3656	0.335503	-61.75	0.0976562		-66.05	0.135994	-67.25	0.0867844	-67.3594	0.0915527	-66.75	0.00419617	-67.2625	0.296402
		-64.9938	0.314331	-64.6562	0.0984192	-57.2562	0.353146	-61.8937	0.0926971		-65.9906	0.156975	-67.4656	0.0740051	-67.3	0.105667	-66.8344	0.0181198	-67.0719	0.289154
		-64.9938	0.285721	-64.6562	0.0793457	-57.2562	0.364494	-61.8937	0.0863075		-65.9906	0.177765	-67.4656	0.0654221	-67.3	0.119972	-66.8344	0.0305176	-67.0719	0.279427
		-64.9062	0.256538	-64.5719	0.0631332	-57.3937	0.369549	-61.8125	0.0780106		-65.9219	0.197792	-67.4094	0.0610352	-67.2937	0.134468	-66.8281	0.0419617	-67.1656	0.267792
		-64.9062	0.227165	-64.5719	0.0514984	-57.3937	0.368118	-61.8125	0.0678062		-65.9219	0.216675	-67.4094	0.0612259	-67.2937	0.148582	-66.8281	0.0518799	-67.1656	0.253105
		-64.925	0.198364	-64.625	0.044632	-57.2781	0.360012	-61.8344	0.056839		-65.8281	0.233841	-67.4812	0.0663757	-67.2531	0.162125	-66.7469	0.0597	-67.0844	0.23632
		-64.925	0.17128	-64.625	0.0411987	-57.2781	0.346184	-61.8344	0.0449181		-65.8281	0.249481	-67.4812	0.075531	-67.2531	0.174141	-66.7469	0.0656128	-67.0844	0.216484
		-64.8031	0.145912	-64.6844	0.0419617	-57.0969	0.327206	-61.6969	0.0329971		-65.9719	0.263023	-67.55	0.0883102	-67.2719	0.185394	-66.6844	0.0694275	-67.1937	0.194168
		-64.8031	0.122452	-64.6844	0.0473022	-57.0969	0.303841	-61.6969	0.0221252		-65.9719	0.273895	-67.55	0.105286	-67.2719	0.195885	-66.6844	0.0715256	-67.1937	0.170517
		-64.7469	0.101852	-64.7687	0.0564575	-56.9312	0.277138	-61.8094	0.0121117		-65.9125	0.283241	-67.5563	0.125694	-67.2687	0.204849	-66.7687	0.0720978	-67.35	0.144577
		-64.7469	0.0839233	-64.7687	0.0688553	-56.9312	0.248909	-61.8094	0.00371933		-65.9125	0.290489	-67.5563	0.14801	-67.2687	0.212479	-66.7687	0.071907	-67.35	0.117302
		-64.85	0.0694275	-64.6344	0.0839233	-57.075	0.219727	-61.6969	-0.00219345		-65.8531	0.295067	-67.4313	0.171661	-67.2406	0.218964	-66.5594	0.0709534	-67.1031	0.0894547
		-64.85	0.0583649	-64.6344	0.10128	-57.075	0.190735	-61.6969	-0.00514984		-65.8531	0.297356	-67.4313	0.196266	-67.2406	0.224876	-66.5594	0.0699997	-67.1031	0.0617981
		-65.0812	0.0501633	-64.7094	0.120544	-57.2219	0.163651	-61.7594	-0.00495911		-66.0125	0.296783	-67.4469	0.220871	-67.2	0.230217	-66.6125	0.0703812	-67.0312	0.0343323
		-65.0812	0.0450134	-64.7094	0.140762	-57.2219	0.138855	-61.7594	-0.00152588		-66.0125	0.29335	-67.4469	0.244713	-67.2	0.235176	-66.6125	0.0722885	-67.0312	0.0087738
		-64.9125	0.0432968	-64.6656	0.161552	-57.2969	0.117683	-61.775	0.00572205		-65.9437	0.287056	-67.3469	0.267982	-67.1625	0.240326	-66.8	0.0764847	-67.0375	-0.0143051
		-64.9125	0.0448227	-64.6656	0.181389	-57.2969	0.100136	-61.775	0.0163078		-65.9437	0.278091	-67.3469	0.289726	-67.1625	0.246048	-66.8	0.0837326	-67.0375	-0.0343323
		-64.7656	0.0490189	-64.5875	0.200272	-57.2531	0.0870705	-61.9937	0.0293732		-65.9	0.266075	-67.3656	0.309181	-67.2	0.252914	-66.7625	0.094986	-67.0437	-0.0501633
		-64.7656	0.0558853	-64.5875	0.217628	-57.2531	0.0790596	-61.9937	0.0457764		-65.9	0.250244	-67.3656	0.327301	-67.2	0.261497	-66.7625	0.111198	-67.0437	-0.0614166
		-64.9187	0.0658035	-64.5219	0.231743	-57.3062	0.075531	-61.9094	0.0642776		-65.8094	0.231743	-67.5281	0.343513	-67.1312	0.271416	-66.7062	0.132942	-67.1844	-0.0677109
		-64.9187	0.078392	-64.5219	0.242996	-57.3062	0.0767708	-61.9094	0.0841141		-65.8094	0.210762	-67.5281	0.357819	-67.1312	0.282478	-66.7062	0.160789	-67.1844	-0.0686646
		-64.8969	0.0930786	-64.7	0.250816	-57.2156	0.0826836	-61.9062	0.105476		-65.8094	0.186729	-67.3625	0.370598	-67.2	0.295448	-66.7406	0.195694	-67.2375	-0.0635147
		-64.8969	0.109673	-64.7	0.25444	-57.2156	0.0934601	-61.9062	0.126934		-65.8094	0.160789	-67.3625	0.382614	-67.2	0.310135	-66.7406	0.238228	-67.2375	-0.053215
		-64.8469	0.127792	-64.7281	0.253296	-57.2938	0.109005	-61.8469	0.148296		-65.75	0.133896	-67.2281	0.394249	-67.2344	0.326347	-66.7687	0.288963	-67.1937	-0.0379562
		-64.8469	0.147629	-64.7281	0.247574	-57.2938	0.129128	-61.8469	0.169563		-65.75	0.106049	-67.2281	0.405693	-67.2344	0.344086	-66.7687	0.348663	-67.1937	-0.0181198
		-64.9125	0.16861	-64.5781	0.237274	-57.1187	0.153828	-61.7375	0.190258		-65.7937	0.0787735	-67.2875	0.417328	-67.275	0.363159	-66.7	0.417709	-67.2094	0.00514984
		-64.9125	0.190735	-64.5781	0.222206	-57.1187	0.183296	-61.7375	0.209904		-65.7937	0.0528336	-67.2875	0.429726	-67.275	0.383377	-66.7	0.496864	-67.2094	0.0310898
		-64.9	0.213051	-64.525	0.202751	-57.1719	0.21801	-61.6812	0.228691		-65.8344	0.028801	-67.3656	0.443459	-67.2344	0.403976	-66.7719	0.587654	-67.3094	0.0587463
		-64.9	0.235367	-64.525	0.179672	-57.1719	0.257683	-61.6812	0.246811		-65.8344	0.00858307	-67.3656	0.458527	-67.2344	0.424957	-66.7719	0.689888	-67.3094	0.0869751
		-64.8781	0.258636	-64.4719	0.15316	-57	0.302792	-61.7812	0.264835		-65.7687	-0.00782013	-67.3781	0.475502	-67.1687	0.446892	-66.6562	0.804329	-67.2406	0.11425
		-64.8781	0.281143	-64.4719	0.123978	-57	0.353146	-61.7812	0.283051		-65.7687	-0.0200272	-67.3781	0.494766	-67.1687	0.469398	-66.6562	0.932503	-67.2406	0.139427
		-64.8875	0.302887	-64.525	0.0934601	-57.1344	0.408936	-61.7156	0.301075		-65.8125	-0.0267029	-67.25	0.515938	-67.0844	0.492668	-66.7687	1.07422	-67.3	0.162506
		-64.8875	0.32444	-64.525	0.0623703	-57.1344	0.469971	-61.7156	0.320244		-65.8125	-0.0278473	-67.25	0.539207	-67.0844	0.517082	-66.7687	1.23043	-67.3	0.182724
		-64.8031	0.34523	-64.4562	0.031662	-57.3	0.535774	-61.7969	0.340652		-65.7531	-0.0236511	-67.25	0.565338	-66.9531	0.542831	-66.5563	1.40171	-67.2344	0.198746
		-64.8031	0.365829	-64.4562	0.00324249	-57.3	0.605679	-61.7969	0.362301		-65.7531	-0.0139236	-67.25	0.593567	-66.9531	0.570297	-66.5563	1.58844	-67.2344	0.211143
		-64.8937	0.385666	-64.4875	-0.0219345	-57.4281	0.678635	-61.7375	0.385857		-65.9594	0.000572205	-67.3156	0.624084	-66.9562	0.600052	-66.6375	1.79043	-66.9437	0.220299
		-64.8937	0.40493	-64.4875	-0.0434875	-57.4281	0.754547	-61.7375	0.411129		-65.9594	0.0190735	-67.3156	0.657463	-66.9562	0.632858	-66.6375	2.00748	-66.9437	0.226212
		-64.8125	0.424004	-64.5031	-0.0595093	-57.1	0.831985	-61.7281	0.437927		-65.9562	0.0408173	-67.3281	0.693703	-67.0875	0.668526	-66.5969	2.23961	-67.0531	0.229836
		-64.8125	0.443077	-64.5031	-0.0696182	-57.1	0.909328	-61.7281	0.466061		-65.9562	0.0648499	-67.3281	0.732422	-67.0875	0.708199	-66.5969	2.48547	-67.0531	0.232124
		-64.6125	0.462532	-64.6125	-0.0730515	-57.175	0.985336	-61.8	0.495243		-66.0406	0.0902176	-67.2594	0.774002	-67.1188	0.752258	-66.6	2.74391	-67.0094	0.234604
		-64.6125	0.48275	-64.6125	-0.0692368	-57.175	1.05963	-61.8	0.525093		-66.0406	0.116158	-67.2594	0.818634	-67.1188	0.800896	-66.6	3.01361	-67.0094	0.237846
		-64.7656	0.503731	-64.525	-0.0581741	-57.0969	1.13087	-61.7875	0.554562		-65.9906	0.141716	-67.1062	0.866127	-67.0812	0.854111	-66.45	3.29285	-67.025	0.242996
		-64.7656	0.526237	-64.525	-0.0396729	-57.0969	1.1981	-61.7875	0.583076		-65.9906	0.165749	-67.1062	0.917435	-67.0812	0.911331	-66.45	3.57895	-67.025	0.251961
		-64.7406	0.550079	-64.6594	-0.0141144	-57.1187	1.26123	-61.6906	0.610352		-65.85	0.188446	-66.9844	0.971603	-67.0687	0.97332	-66.3375	3.87001	-67.1344	0.265121
		-64.7406	0.575638	-64.6594	0.0181198	-57.1187	1.31979	-61.6906	0.635624		-65.85	0.209236	-66.9844	1.02882	-67.0687	1.03931	-66.3375	4.16336	-67.1344	0.283051
		-64.7719	0.604057	-64.7719	0.056076	-57.0531	1.37386	-61.6625	0.658131		-65.7281	0.228119	-67.0062	1.08948	-66.8906	1.10931	-66.2969	4.45518	-67.1375	0.307083
		-64.7719	0.634384	-64.7719	0.0988007	-57.0531	1.42403	-61.6625	0.677776		-65.7281	0.245476	-67.0062	1.15261	-66.8906	1.18237	-66.2969	4.74319	-67.1375	0.337029
		-64.7469	0.667381	-64.6375	0.145721	-56.6063	1.47076	-61.5562	0.693989		-65.6156	0.261497	-67.0969	1.21765	-66.8281	1.25771	-65.9406	5.02472	-67.2062	0.372505
		-64.7469	0.703239	-64.6375	0.195312	-56.6063	1.5151	-61.5562	0.706673		-65.6156	0.276756	-67.0969	1.28403	-66.8281	1.33533	-65.9406	5.2969	-67.2062	0.413704
		-64.7562	0.74234	-64.6656	0.246239	-56.5219	1.55811	-61.55	0.716591		-65.7094	0.292587	-67.1531	1.35155	-66.8969	1.41392	-65.5906	5.55592	-67.2344	0.460434
		-64.7562	0.785065	-64.6656	0.2985	-56.5219	1.60055	-61.55	0.723553		-65.7094	0.309753	-67.1531	1.41888	-66.8969	1.49307	-65.5906	5.79948	-67.2344	0.511169
		-64.7	0.831413	-64.5031	0.35038	-56.5156	1.64356	-61.5906	0.728226		-65.7438	0.329208	-67.15	1.48487	-66.9469	1.57223	-65.4437	6.0257	-67.1219	0.565529
		-64.7	0.881577	-64.5031	0.400734	-56.5156	1.68819	-61.5906	0.731277		-65.7438	0.352097	-67.15	1.54896	-66.9469	1.65081	-65.4437	6.23207	-67.1219	0.622559
		-64.5563	0.935936	-64.6031	0.449181	-56.7938	1.73521	-61.4125	0.733566		-65.9313	0.377846	-66.9875	1.61018	-66.8219	1.72844	-65.0969	6.41689	-67.0594	0.680161
		-64.5563	0.994873	-64.6031	0.495338	-56.7938	1.7849	-61.4125	0.73595		-65.9313	0.407982	-66.9875	1.66779	-66.8219	1.80473	-65.0969	6.57845	-67.0594	0.738335
		-64.5812	1.05877	-64.5	0.538826	-56.7687	1.83754	-61.425	0.739765		-65.85	0.44384	-66.95	1.721	-66.5656	1.87988	-64.7344	6.71616	-67	0.795555
		-64.5812	1.12705	-64.5	0.578499	-56.7687	1.89323	-61.425	0.745678		-65.85	0.484085	-66.95	1.76945	-66.5656	1.9537	-64.7344	6.82907	-67	0.850487
		-64.4469	1.19953	-64.5094	0.615501	-56.7969	1.9515	-61.4375	0.754261		-65.7625	0.529289	-66.6531	1.81274	-66.4156	2.0256	-64.3656	6.91681	-66.9906	0.902939
		-64.4469	1.27735	-64.5094	0.649643	-56.7969	2.01178	-61.4375	0.76685		-65.7625	0.579262	-66.6531	1.8507	-66.4156	2.09637	-64.3656	6.98013	-66.9906	0.951576
		-64.3625	1.35918	-64.5656	0.680542	-56.6094	2.07338	-61.3	0.783825		-65.8063	0.63324	-66.3406	1.88389	-66.425	2.16579	-64.1344	7.01904	-66.9156	0.996017
		-64.3625	1.44444	-64.5656	0.70858	-56.6094	2.13499	-61.3	0.805283		-65.8063	0.691223	-66.3406	1.91174	-66.425	2.23389	-64.1344	7.0343	-66.9156	1.03645
		-64.5219	1.53313	-64.4281	0.734711	-56.3344	2.19593	-61.5031	0.831604		-65.85	0.752258	-66.3375	1.93462	-66.3594	2.30122	-63.7938	7.02715	-66.9719	1.07231
		-64.5219	1.62411	-64.4281	0.759697	-56.3344	2.25515	-61.5031	0.86298		-65.85	0.815773	-66.3375	1.95427	-66.3594	2.36759	-63.7938	6.99883	-66.9719	1.10359
		-64.7031	1.71623	-64.2156	0.782585	-56.1625	2.31152	-61.5562	0.899029		-65.725	0.880814	-66.5437	1.97086	-66.3312	2.4334	-63.4	6.95133	-66.8531	1.13068
		-64.7031	1.80855	-64.2156	0.804329	-56.1625	2.36425	-61.5562	0.938988		-65.725	0.946617	-66.5437	1.98441	-66.3312	2.49825	-63.4	6.88648	-66.8531	1.15414
		-64.4625	1.89991	-64.425	0.826073	-56.1531	2.4127	-61.3094	0.982189		-65.6469	1.0128	-66.6	1.99585	-66.35	2.56214	-63.0906	6.80599	-66.7375	1.17397
		-64.4625	1.98879	-64.425	0.847244	-56.1531	2.45647	-61.3094	1.02758		-65.6469	1.07937	-66.6	2.00615	-66.35	2.62508	-63.0906	6.71206	-66.7375	1.19114
		-64.1844	2.07462	-64.3719	0.867653	-56.0219	2.495	-61.3125	1.07393		-65.5031	1.14498	-66.3656	2.0155	-66.0906	2.6865	-62.8937	6.60706	-66.6125	1.20659
		-64.1844	2.15588	-64.3719	0.888634	-56.0219	2.52838	-61.3125	1.12066		-65.5031	1.20945	-66.3656	2.02427	-66.0906	2.74658	-62.8937	6.49309	-66.6125	1.22108
		-64.0969	2.2316	-64.2937	0.909042	-55.85	2.55661	-61.3594	1.16653		-65.6125	1.27354	-66.2375	2.03266	-65.9531	2.80418	-62.6312	6.37274	-66.7281	1.23463
		-64.0969	2.30141	-64.2937	0.928307	-55.85	2.57959	-61.3594	1.21031		-65.6125	1.3361	-66.2375	2.04144	-65.9531	2.85912	-62.6312	6.24809	-66.7281	1.24836
		-64.05	2.36464	-64.4281	0.947952	-55.8906	2.59781	-61.2781	1.25141		-65.55	1.39751	-66.1813	2.05002	-65.725	2.91157	-62.3156	6.12097	-66.5844	1.26305
		-64.05	2.42128	-64.4281	0.967216	-55.8906	2.61145	-61.2781	1.28851		-65.55	1.45779	-66.1813	2.05803	-65.725	2.96001	-62.3156	5.99356	-66.5844	1.27907
		-63.9	2.47154	-64.2906	0.985336	-55.85	2.6206	-61.1812	1.32093		-65.425	1.51691	-66.0094	2.06623	-65.7281	3.00446	-62.0562	5.86729	-66.5719	1.297
		-63.9	2.51598	-64.2906	1.00231	-55.85	2.62585	-61.1812	1.34888		-65.425	1.57471	-66.0094	2.07424	-65.7281	3.0447	-62.0562	5.74389	-66.5719	1.31683
		-63.7281	2.55499	-64.1281	1.01814	-55.5719	2.62737	-61.0125	1.37205		-65.3	1.6304	-65.9	2.08187	-65.6406	3.07922	-61.8312	5.62496	-66.5844	1.33953
		-63.7281	2.58961	-64.1281	1.03283	-55.5719	2.62508	-61.0125	1.39046		-65.3	1.68495	-65.9	2.08855	-65.6406	3.10841	-61.8312	5.51128	-66.5844	1.36433
		-63.5656	2.62098	-64.075	1.04599	-55.4594	2.61908	-60.9562	1.40457		-65.3469	1.73759	-65.8594	2.09446	-65.5437	3.13244	-61.7781	5.4038	-66.5563	1.39179
		-63.5656	2.65055	-64.075	1.05782	-55.4594	2.60935	-60.9562	1.41449		-65.3469	1.78757	-65.8594	2.09961	-65.5437	3.14999	-61.7781	5.30329	-66.5563	1.42155
		-63.5687	2.67944	-64.0875	1.06812	-55.3094	2.59609	-60.9562	1.42126		-65.2531	1.83468	-65.8937	2.104	-65.2312	3.16181	-61.6656	5.20954	-66.4812	1.45321
		-63.5687	2.70882	-64.0875	1.07727	-55.3094	2.57893	-60.9562	1.42584		-65.2531	1.87874	-65.8937	2.10762	-65.2312	3.1683	-61.6656	5.12238	-66.4812	1.48735
		-63.45	2.73962	-64.0469	1.08528	-55.4719	2.55775	-60.775	1.4287		-65.2625	1.91898	-65.8469	2.11048	-65.1813	3.16849	-61.4062	5.04227	-66.3438	1.52302
		-63.45	2.773	-64.0469	1.09196	-55.4719	2.53286	-60.775	1.43108		-65.2625	1.95541	-65.8469	2.11334	-65.1813	3.16277	-61.4062	4.96893	-66.3438	1.5604
		-63.3781	2.81048	-63.9562	1.09777	-55.2906	2.50406	-60.8219	1.43366		-65.1594	1.98784	-65.7	2.1162	-65.075	3.15247	-61.125	4.90131	-66.3063	1.59893
		-63.3781	2.85225	-63.9562	1.10235	-55.2906	2.47154	-60.8219	1.43728		-65.1594	2.01473	-65.7	2.11887	-65.075	3.13778	-61.125	4.83856	-66.3063	1.63822
		-63.2875	2.89831	-64	1.10607	-54.9906	2.4353	-60.75	1.44243		-65.0594	2.03667	-65.3937	2.12154	-64.8812	3.11871	-60.8812	4.78039	-66.2937	1.67809
		-63.2875	2.94914	-64	1.10893	-54.9906	2.39563	-60.75	1.44939		-65.0594	2.05421	-65.3937	2.1246	-64.8812	3.09639	-60.8812	4.72603	-66.2937	1.71871
		-63.3187	3.00503	-63.9719	1.11046	-54.8719	2.35329	-60.8	1.45912		-64.7812	2.06699	-65.4	2.12898	-64.675	3.07217	-60.8781	4.67434	-66.175	1.7601
		-63.3187	3.0652	-63.9719	1.11074	-54.8719	2.30827	-60.8	1.47142		-64.7812	2.075	-65.4	2.13432	-64.675	3.04565	-60.8781	4.62475	-66.175	1.80111
		-63.0938	3.12901	-63.9	1.10931	-54.8438	2.26126	-60.7687	1.48582		-64.6	2.07882	-65.3656	2.14024	-64.4906	3.01723	-60.6562	4.57659	-66.1188	1.84174
		-63.0938	3.19653	-63.9	1.10588	-54.8438	2.2131	-60.7687	1.50251		-64.6	2.0792	-65.3656	2.14691	-64.4906	2.98882	-60.6562	4.52909	-66.1188	1.88217
		-62.8969	3.26624	-63.8219	1.10092	-54.7562	2.16417	-60.7	1.52111		-64.6094	2.07634	-65.2812	2.15492	-64.6406	2.96097	-60.4062	4.48236	-65.9938	1.92184
		-62.8969	3.3371	-63.8219	1.09339	-54.7562	2.11535	-60.7	1.54142		-64.6094	2.071	-65.2812	2.16408	-64.6406	2.93388	-60.4062	4.43573	-65.9938	1.96075
		-62.8156	3.40853	-63.7406	1.08299	-54.65	2.06699	-60.5844	1.56269		-64.6062	2.06394	-65.3375	2.17304	-64.6094	2.90718	-60.3594	4.3889	-65.8719	1.99852
		-62.8156	3.47919	-63.7406	1.07031	-54.65	2.01969	-60.5844	1.58453		-64.6062	2.05574	-65.3375	2.1822	-64.6094	2.88219	-60.3594	4.34198	-65.8719	2.03419
		-62.5687	3.54786	-63.7938	1.05524	-54.6656	1.97411	-60.4188	1.60656		-64.675	2.04773	-65.2937	2.19173	-64.2594	2.85854	-59.8687	4.29487	-65.9344	2.06776
		-62.5687	3.61338	-63.7938	1.03741	-54.6656	1.93062	-60.4188	1.62811		-64.675	2.03953	-65.2937	2.20051	-64.2594	2.83661	-59.8687	4.24776	-65.9344	2.09846
		-62.5	3.67508	-63.6906	1.01757	-54.5625	1.88951	-60.4688	1.64919		-64.5687	2.03152	-65.0719	2.20833	-64.0594	2.81639	-59.775	4.20055	-65.8875	2.12555
		-62.5	3.73163	-63.6906	0.996304	-54.5625	1.85108	-60.4688	1.66931		-64.5687	2.02541	-65.0719	2.21539	-64.0594	2.79694	-59.775	4.15411	-65.8875	2.1492
		-62.4188	3.78199	-63.6281	0.973511	-54.6031	1.81541	-60.3531	1.68867		-64.3187	2.02122	-64.8688	2.22111	-64.0469	2.77863	-59.8563	4.10824	-65.6844	2.16827
		-62.4188	3.82538	-63.6281	0.950241	-54.6031	1.7828	-60.3531	1.70717		-64.3187	2.01855	-64.8688	2.22454	-64.0469	2.76089	-59.8563	4.06303	-65.6844	2.1822
		-62.2	3.86114	-63.5562	0.927448	-54.5	1.75333	-60.2469	1.72453		-64.3	2.01817	-64.8094	2.22607	-64.15	2.74343	-59.7156	4.01917	-65.675	2.19116
		-62.2	3.8888	-63.5562	0.905704	-54.5	1.72701	-60.2469	1.74084		-64.3	2.02045	-64.8094	2.22588	-64.15	2.72551	-59.7156	3.97596	-65.675	2.19402
		-62.0219	3.90816	-63.4937	0.886154	-54.3469	1.70422	-60.2219	1.75695		-64.2375	2.02522	-64.7937	2.22359	-63.9656	2.70758	-59.3687	3.93381	-65.525	2.19116
		-62.0219	3.91884	-63.4937	0.86937	-54.3469	1.68457	-60.2219	1.77307		-64.2375	2.03247	-64.7937	2.21901	-63.9656	2.68908	-59.3687	3.8929	-65.525	2.18296
		-61.85	3.92113	-63.3937	0.856209	-54.2562	1.66826	-60.15	1.78871		-64.0219	2.04201	-64.65	2.21176	-63.7469	2.66962	-59.1344	3.85218	-65.25	2.16942
		-61.85	3.91588	-63.3937	0.84753	-54.2562	1.65539	-60.15	1.80464		-64.0219	2.05402	-64.65	2.20299	-63.7469	2.64978	-59.1344	3.81231	-65.25	2.15073
		-61.6219	3.9032	-63.5062	0.84343	-54.0844	1.64576	-60.0469	1.82066		-64.1125	2.06795	-64.45	2.19193	-63.6875	2.62947	-59.1031	3.77254	-65.2188	2.12746
		-61.6219	3.88422	-63.5062	0.844669	-54.0844	1.63937	-60.0469	1.83735		-64.1125	2.08359	-64.45	2.17857	-63.6875	2.60878	-59.1031	3.73211	-65.2188	2.10114
		-61.4094	3.86047	-63.5656	0.85125	-54.1531	1.63584	-60	1.85452		-64.0187	2.10085	-64.5	2.1637	-63.4562	2.58837	-59.05	3.6912	-65.1687	2.07253
		-61.4094	3.83282	-63.5656	0.863171	-54.1531	1.63536	-60	1.87187		-64.0187	2.11906	-64.5	2.14653	-63.4562	2.56891	-59.05	3.64923	-65.1687	2.04163
		-61.2062	3.80268	-63.6187	0.880337	-54.2313	1.63736	-59.9781	1.8899		-63.9531	2.13814	-64.5125	2.12746	-63.3375	2.55079	-58.9813	3.60565	-65.15	2.00977
		-61.2062	3.77216	-63.6187	0.902271	-54.2313	1.64099	-59.9781	1.90783		-63.9531	2.15693	-64.5125	2.10686	-63.3375	2.53458	-58.9813	3.56073	-65.15	1.97887
		-61.0312	3.74269	-63.5562	0.928402	-54.1406	1.64614	-59.8687	1.92528		-63.8469	2.17485	-64.4906	2.08492	-63.3	2.52104	-58.75	3.51429	-64.9938	1.9495
		-61.0312	3.71532	-63.5562	0.958157	-54.1406	1.65148	-59.8687	1.94244		-63.8469	2.19164	-64.4906	2.06165	-63.3	2.51074	-58.75	3.46613	-64.9938	1.92261
		-61.1094	3.69205	-63.3781	0.991154	-53.9344	1.65644	-59.8719	1.95904		-63.7562	2.20671	-64.25	2.03762	-63.2281	2.50397	-58.5062	3.41682	-64.9781	1.89934
		-61.1094	3.67413	-63.3781	1.02634	-53.9344	1.66025	-59.8719	1.97449		-63.7562	2.2193	-64.25	2.01283	-63.2281	2.5013	-58.5062	3.36657	-64.9781	1.87988
		-60.9375	3.66249	-63.3719	1.06297	-54.0219	1.66149	-59.6531	1.9886		-63.7406	2.22883	-64.1062	1.98822	-63.2719	2.50244	-58.2437	3.31602	-64.9031	1.86501
		-60.9375	3.65772	-63.3719	1.10054	-54.0219	1.65958	-59.6531	2.00081		-63.7406	2.23513	-64.1062	1.96457	-63.2719	2.5075	-58.2437	3.26605	-64.9031	1.85585
		-60.6562	3.65992	-63.2188	1.13831	-53.9125	1.65348	-59.6	2.01111		-63.4344	2.23742	-63.9125	1.94168	-63.05	2.51665	-58.1125	3.21712	-64.95	1.85261
		-60.6562	3.66955	-63.2188	1.17559	-53.9125	1.64251	-59.6	2.0196		-63.4344	2.23608	-63.9125	1.92108	-63.05	2.52895	-58.1125	3.16973	-64.95	1.85471
		-60.6625	3.68586	-63.2656	1.21174	-53.9062	1.62582	-59.5406	2.02599		-63.4156	2.23083	-63.85	1.90353	-63.0844	2.54383	-58.0719	3.1251	-64.75	1.86234
		-60.6625	3.70846	-63.2656	1.24645	-53.9062	1.60303	-59.5406	2.03028		-63.4156	2.22206	-63.85	1.88932	-63.0844	2.56052	-58.0719	3.08399	-64.75	1.87569
		-60.5906	3.73631	-63.2562	1.27974	-53.6156	1.57394	-59.3906	2.03247		-63.3812	2.20985	-63.9312	1.87912	-62.9844	2.57854	-58.0625	3.04689	-64.7125	1.894
		-60.5906	3.76787	-63.2562	1.31054	-53.6156	1.53818	-59.3906	2.03276		-63.3812	2.19498	-63.9312	1.87378	-62.9844	2.59676	-58.0625	3.01409	-64.7125	1.91689
		-60.5344	3.80201	-63.175	1.33905	-53.525	1.4966	-59.2812	2.03199		-63.2844	2.17829	-63.9188	1.8733	-62.85	2.61374	-58.0094	2.98595	-64.6344	1.94416
		-60.5344	3.83711	-63.175	1.36557	-53.525	1.4493	-59.2812	2.02942		-63.2844	2.16017	-63.9188	1.8775	-62.85	2.6289	-58.0094	2.96259	-64.6344	1.97525
		-60.3687	3.87154	-63.0781	1.38941	-53.4844	1.39656	-59.3281	2.02551		-63.0719	2.14233	-63.8969	1.88704	-62.6812	2.6413	-57.9219	2.94428	-64.7	2.00958
		-60.3687	3.90387	-63.0781	1.41068	-53.4844	1.33991	-59.3281	2.02131		-63.0719	2.12536	-63.8969	1.90125	-62.6812	2.64959	-57.9219	2.93036	-64.7	2.04601
		-60.0781	3.93267	-63.1156	1.42956	-53.4562	1.27983	-59.2406	2.01569		-62.9375	2.11048	-63.7969	1.91936	-62.375	2.6535	-57.7281	2.92034	-64.5312	2.08435
		-60.0781	3.95708	-63.1156	1.44644	-53.4562	1.21717	-59.2406	2.00939		-62.9375	2.09866	-63.7969	1.94092	-62.375	2.65236	-57.7281	2.91433	-64.5312	2.1244
		-59.7906	3.97606	-63.05	1.46055	-53.3	1.15318	-59.0906	2.003		-63.0906	2.09074	-63.8	1.96495	-62.325	2.64521	-57.6688	2.91138	-64.4437	2.16484
		-59.7906	3.98865	-63.05	1.47247	-53.3	1.08891	-59.0906	1.99623		-63.0906	2.08826	-63.8	1.9906	-62.325	2.63176	-57.6688	2.9108	-64.4437	2.20547
		-59.4094	3.99494	-62.7875	1.48287	-53.4875	1.02501	-59.0219	1.9887		-62.9	2.09103	-63.575	2.01607	-62.4	2.6123	-57.5062	2.91185	-64.2375	2.24628
		-59.4094	3.99475	-62.7875	1.49107	-53.4875	0.962257	-59.0219	1.98059		-62.9	2.09961	-63.575	2.04048	-62.4	2.58636	-57.5062	2.91414	-64.2375	2.28653
		-59.5438	3.98865	-62.8375	1.49755	-53.4437	0.901794	-58.8844	1.97191		-62.825	2.11468	-63.4375	2.0628	-62.3094	2.55442	-57.2687	2.917	-64.1281	2.32582
		-59.5438	3.97644	-62.8375	1.5027	-53.4437	0.843906	-58.8844	1.96238		-62.825	2.13585	-63.4375	2.0813	-62.3094	2.51703	-57.2687	2.91996	-64.1281	2.36435
		-59.4188	3.95918	-62.7344	1.50623	-53.4344	0.789165	-58.8625	1.95217		-62.8281	2.16303	-63.45	2.09503	-62.1437	2.4745	-57.1594	2.92292	-64.15	2.40154
		-59.4188	3.93801	-62.7344	1.50852	-53.4344	0.737953	-58.8625	1.94044		-62.8281	2.19526	-63.45	2.10295	-62.1437	2.42786	-57.1594	2.9253	-64.15	2.43664
		-59.2313	3.91331	-62.7	1.51005	-53.3312	0.690174	-58.8906	1.92728		-62.85	2.23179	-63.3094	2.10457	-61.9562	2.3778	-57.175	2.92702	-64.1969	2.47068
		-59.2313	3.88651	-62.7	1.51062	-53.3312	0.64621	-58.8906	1.91298		-62.85	2.27165	-63.3094	2.09894	-61.9562	2.32611	-57.175	2.92816	-64.1969	2.5032
		-58.9219	3.85866	-62.7562	1.51081	-53.3094	0.605965	-58.8344	1.89724		-62.6531	2.3138	-63.3312	2.08549	-61.7906	2.27375	-57.075	2.92845	-63.925	2.53382
		-58.9219	3.83034	-62.7562	1.511	-53.3094	0.569534	-58.8344	1.88007		-62.6531	2.35643	-63.3312	2.06451	-61.7906	2.22206	-57.075	2.92854	-63.925	2.56243
		-58.7844	3.80211	-62.7313	1.51129	-53.1594	0.537109	-58.65	1.86138		-62.5719	2.3983	-63.0469	2.03571	-61.7531	2.17304	-56.8781	2.92835	-63.7969	2.58904
		-58.7844	3.77541	-62.7313	1.51196	-53.1594	0.508308	-58.65	1.84174		-62.5719	2.43835	-63.0469	1.99928	-61.7531	2.12784	-56.8781	2.92768	-63.7969	2.61402
		-58.7719	3.75032	-62.4937	1.51348	-53.2313	0.483418	-58.3844	1.82142		-62.475	2.47478	-62.9	1.9558	-61.675	2.08788	-56.7719	2.9273	-63.6656	2.63691
		-58.7719	3.72715	-62.4937	1.51644	-53.2313	0.462914	-58.3844	1.80082		-62.475	2.50607	-62.9	1.90601	-61.675	2.05488	-56.7719	2.9273	-63.6656	2.65779
		-58.7344	3.70636	-62.4813	1.52063	-53.4813	0.446701	-58.3969	1.78032		-62.3187	2.53134	-62.9594	1.85061	-61.5719	2.02961	-56.5875	2.92759	-63.6	2.67601
		-58.7344	3.68805	-62.4813	1.52683	-53.4813	0.434971	-58.3969	1.76039		-62.3187	2.54974	-62.9594	1.79033	-61.5719	2.01283	-56.5875	2.92816	-63.6	2.69232
		-58.4469	3.67222	-62.3344	1.53561	-53.2313	0.4282	-58.3937	1.7415		-62.2094	2.56023	-62.8438	1.72625	-61.5625	2.00567	-56.5062	2.92931	-63.3969	2.70643
		-58.4469	3.65887	-62.3344	1.54629	-53.2313	0.426579	-58.3937	1.72424		-62.2094	2.56224	-62.8438	1.65968	-61.5625	2.00806	-56.5062	2.93121	-63.3969	2.71759
		-58.275	3.64771	-62.2938	1.55954	-53.15	0.430489	-58.45	1.70889		-62.0094	2.55566	-62.7969	1.5913	-61.5656	2.0196	-56.4906	2.9335	-63.4094	2.72608
		-58.275	3.63846	-62.2938	1.57547	-53.15	0.440216	-58.45	1.69554		-62.0094	2.5403	-62.7969	1.52245	-61.5656	2.0401	-56.4906	2.93608	-63.4094	2.73199
		-58.1406	3.63111	-62.25	1.59359	-53.2594	0.455856	-58.2437	1.68467		-62	2.51617	-62.6344	1.45454	-61.575	2.06861	-56.4437	2.93884	-63.3344	2.73523
		-58.1406	3.62549	-62.25	1.6139	-53.2594	0.477695	-58.2437	1.67665		-62	2.48375	-62.6344	1.38788	-61.575	2.10371	-56.4437	2.94161	-63.3344	2.73504
		-58.0938	3.62139	-62.3687	1.63593	-53.2719	0.505733	-58.2594	1.67084		-61.7437	2.44379	-62.7281	1.32341	-61.5438	2.14348	-56.15	2.94418	-63.2375	2.7318
		-58.0938	3.61881	-62.3687	1.65882	-53.2719	0.539684	-58.2594	1.66712		-61.7437	2.39716	-62.7281	1.26276	-61.5438	2.18706	-56.15	2.94628	-63.2375	2.7257
		-57.8875	3.61776	-62.3219	1.68219	-53.0687	0.579166	-58.1937	1.66559		-61.6094	2.34442	-62.6	1.20649	-61.5344	2.23236	-56.0062	2.94771	-63.1125	2.71645
		-57.8875	3.61767	-62.3219	1.70527	-53.0687	0.623608	-58.1937	1.6654		-61.6094	2.28662	-62.6	1.15423	-61.5344	2.27709	-56.0062	2.94809	-63.1125	2.70405
		-57.675	3.619	-62.1875	1.7271	-53.2437	0.672245	-58.1906	1.66597		-61.6719	2.22492	-62.6781	1.10731	-61.3094	2.31981	-55.9281	2.94714	-62.8	2.68869
		-57.675	3.62244	-62.1875	1.74713	-53.2437	0.724602	-58.1906	1.66693		-61.6719	2.16036	-62.6781	1.06611	-61.3094	2.35872	-55.9281	2.94437	-62.8	2.67096
		-57.5438	3.62701	-62.05	1.76392	-53.2781	0.779247	-57.9969	1.66759		-61.6656	2.09398	-62.5625	1.03045	-61.0906	2.39258	-55.8469	2.93989	-62.6906	2.65036
		-57.5438	3.63283	-62.05	1.77698	-53.2781	0.835037	-57.9969	1.66712		-61.6656	2.02703	-62.5625	1.00079	-61.0906	2.42033	-55.8469	2.93331	-62.6906	2.62728
		-57.4344	3.64056	-62.0625	1.78633	-53.3125	0.890732	-57.975	1.66512		-61.4781	1.96075	-62.5844	0.976753	-60.95	2.44112	-55.7687	2.92406	-62.6031	2.60191
		-57.4344	3.6499	-62.0625	1.791	-53.3125	0.944805	-57.975	1.66101		-61.4781	1.8961	-62.5844	0.958729	-60.95	2.45419	-55.7687	2.91214	-62.6031	2.57444
		-57.3656	3.6603	-61.8344	1.79033	-53.25	0.996304	-58.0062	1.65415		-61.325	1.83363	-62.45	0.946045	-60.8125	2.45972	-55.6063	2.89707	-62.6688	2.54536
		-57.3656	3.67193	-61.8344	1.7848	-53.25	1.04342	-58.0062	1.64452		-61.325	1.77393	-62.45	0.938225	-60.8125	2.458	-55.6063	2.87886	-62.6688	2.51436
		-57.1937	3.68481	-61.6844	1.77422	-53.1281	1.08528	-57.7437	1.63183		-61.2531	1.71833	-62.5687	0.935459	-60.6	2.44904	-55.4781	2.8573	-62.5781	2.48156
		-57.1937	3.69835	-61.6844	1.75867	-53.1281	1.12104	-57.7437	1.61572		-61.2531	1.66693	-62.5687	0.936794	-60.6	2.4334	-55.4781	2.83213	-62.5781	2.44751
		-57.0094	3.71265	-61.5562	1.73855	-52.7469	1.14946	-57.7094	1.59683		-61.275	1.61972	-62.4969	0.942039	-60.5469	2.41222	-55.2656	2.80333	-62.3656	2.41232
		-57.0094	3.72658	-61.5562	1.71452	-52.7469	1.16987	-57.7094	1.57461		-61.275	1.57776	-62.4969	0.950432	-60.5469	2.38619	-55.2656	2.77071	-62.3656	2.37589
		-56.9031	3.73983	-61.6406	1.68724	-52.8344	1.18179	-57.6594	1.54953		-61.25	1.54066	-62.3469	0.961494	-60.5719	2.35596	-55.2969	2.73447	-62.3937	2.33841
		-56.9031	3.75252	-61.6406	1.65749	-52.8344	1.18532	-57.6594	1.52264		-61.25	1.50776	-62.3469	0.975037	-60.5719	2.3222	-55.2969	2.69461	-62.3937	2.29988
		-56.7625	3.76387	-61.6656	1.62592	-52.8438	1.18027	-57.5187	1.49355		-61.2313	1.47982	-62.5125	0.989914	-60.6656	2.28558	-55.1031	2.65112	-62.2156	2.26088
		-56.7625	3.77321	-61.6656	1.59302	-52.8438	1.16634	-57.5187	1.46294		-61.2313	1.45588	-62.5125	1.00584	-60.6656	2.24743	-55.1031	2.60439	-62.2156	2.22187
		-56.5562	3.78008	-61.6531	1.55964	-52.9719	1.14441	-57.6406	1.43175		-61.2188	1.43528	-62.4188	1.02282	-60.4719	2.20747	-55.0375	2.55461	-62.0969	2.18267
		-56.5562	3.78408	-61.6531	1.52636	-52.9719	1.11504	-57.6406	1.40076		-61.2188	1.41802	-62.4188	1.04017	-60.4719	2.16589	-55.0375	2.50206	-62.0969	2.14415
		-56.4437	3.78513	-61.5062	1.49403	-52.7625	1.07861	-57.5625	1.36995		-61.1719	1.40295	-62.1875	1.05715	-60.3844	2.12364	-54.8937	2.44713	-61.9188	2.10705
		-56.4437	3.78294	-61.5062	1.46313	-52.7625	1.03626	-57.5625	1.33972		-61.1719	1.38988	-62.1875	1.07374	-60.3844	2.08063	-54.8937	2.39029	-61.9188	2.07148
		-56.075	3.77703	-61.1437	1.43394	-52.5844	0.98877	-57.45	1.31102		-60.9406	1.37825	-62.2469	1.08976	-60.125	2.03695	-54.6625	2.33183	-61.8875	2.0381
		-56.075	3.76749	-61.1437	1.40676	-52.5844	0.93689	-57.45	1.28431		-60.9406	1.36709	-62.2469	1.10483	-60.125	1.99261	-54.6625	2.27213	-61.8875	2.00739
		-56.0312	3.75395	-61.3312	1.38206	-52.6156	0.881958	-57.3469	1.2599		-60.9813	1.35603	-62.25	1.11914	-60.0687	1.94769	-54.7281	2.21176	-61.85	1.9803
		-56.0312	3.7365	-61.3312	1.36023	-52.6156	0.824642	-57.3469	1.23768		-60.9813	1.34478	-62.25	1.13211	-60.0687	1.90277	-54.7281	2.15101	-61.85	1.95684
		-56.1	3.71532	-61.4031	1.34096	-52.5938	0.766182	-57.3531	1.21832		-60.9094	1.33276	-62.2344	1.14307	-60.025	1.85785	-54.7469	2.09007	-61.8219	1.93768
		-56.1	3.69034	-61.4031	1.32494	-52.5938	0.707626	-57.3531	1.20173		-60.9094	1.3195	-62.2344	1.15213	-60.025	1.81246	-54.7469	2.02961	-61.8219	1.92299
		-55.9344	3.66201	-61.3312	1.31226	-52.6	0.649452	-57.275	1.18761		-60.8719	1.30529	-62.1	1.15938	-59.85	1.76744	-54.5	1.97001	-61.7313	1.91259
		-55.9344	3.63035	-61.3312	1.30291	-52.6	0.592899	-57.275	1.17607		-60.8719	1.29013	-62.1	1.16425	-59.85	1.72319	-54.5	1.91126	-61.7313	1.90678
		-55.4781	3.59545	-61.2594	1.297	-52.55	0.53854	-57.2719	1.16663		-60.7094	1.27325	-61.9781	1.16606	-59.9719	1.6798	-54.4844	1.85366	-61.7656	1.90516
		-55.4781	3.55778	-61.2594	1.29461	-52.55	0.487232	-57.2719	1.15948		-60.7094	1.25523	-61.9781	1.16463	-59.9719	1.63774	-54.4844	1.7972	-61.7656	1.90735
		-55.2125	3.51763	-61.15	1.29614	-52.5281	0.439835	-57.3812	1.15423		-60.8594	1.23625	-62.0094	1.15967	-59.9594	1.59731	-54.4219	1.74227	-61.7313	1.91288
		-55.2125	3.47519	-61.15	1.30091	-52.5281	0.396538	-57.3812	1.15004		-60.8594	1.21613	-62.0094	1.1507	-59.9594	1.55916	-54.4219	1.68896	-61.7313	1.92184
		-55.4719	3.43094	-60.9469	1.30968	-52.675	0.357533	-57.1906	1.14651		-60.6531	1.19534	-62.0375	1.13697	-59.8563	1.52378	-54.4031	1.63708	-61.5187	1.93319
		-55.4719	3.38478	-60.9469	1.32208	-52.675	0.323582	-57.1906	1.14355		-60.6531	1.17397	-62.0375	1.11866	-59.8563	1.49145	-54.4031	1.58672	-61.5187	1.94578
		-55.35	3.33719	-61.1	1.33734	-52.6719	0.294971	-57.1937	1.14117		-60.6312	1.15147	-62.0438	1.09539	-59.7562	1.46236	-54.275	1.53761	-61.4813	1.95904
		-55.35	3.28846	-61.1	1.35641	-52.6719	0.27113	-57.1937	1.1385		-60.6312	1.12896	-62.0438	1.06688	-59.7562	1.43719	-54.275	1.48954	-61.4813	1.97277
		-55.0969	3.23868	-61.05	1.37806	-52.3844	0.252247	-57.1	1.13544		-60.6219	1.10645	-61.9031	1.0334	-59.6719	1.41668	-54.1219	1.44262	-61.2875	1.98622
		-55.0969	3.18851	-61.05	1.40171	-52.3844	0.238323	-57.1	1.1322		-60.6219	1.08318	-61.9031	0.994873	-59.6719	1.40076	-54.1219	1.39647	-61.2875	1.99823
		-54.7469	3.13787	-61.0312	1.42736	-52.4688	0.228786	-57.0719	1.12848		-60.6594	1.06001	-61.6875	0.951958	-59.575	1.38969	-54.1906	1.35069	-61.2656	2.00853
		-54.7469	3.08676	-61.0312	1.45416	-52.4688	0.223351	-57.0719	1.12457		-60.6594	1.03655	-61.6875	0.905228	-59.575	1.38378	-54.1906	1.30539	-61.2656	2.01654
		-54.7906	3.03564	-60.9	1.48163	-52.525	0.221443	-56.8563	1.12076		-60.4281	1.01271	-61.6812	0.855541	-59.5594	1.38311	-54.1437	1.2599	-61.2406	2.02198
		-54.7906	2.98462	-60.9	1.509	-52.525	0.222397	-56.8563	1.11694		-60.4281	0.98877	-61.6812	0.803757	-59.5594	1.38721	-54.1437	1.21403	-61.2406	2.02456
		-54.8062	2.93407	-60.9875	1.53542	-52.7313	0.225925	-56.9906	1.11361		-60.5187	0.964451	-61.7656	0.750828	-59.5219	1.39589	-54.2875	1.16787	-61.1219	2.02341
		-54.8062	2.88401	-60.9875	1.56012	-52.7313	0.23098	-56.9906	1.11103		-60.5187	0.939941	-61.7656	0.698662	-59.5219	1.40858	-54.2875	1.12114	-61.1219	2.01874
		-54.7281	2.8348	-60.8156	1.58281	-52.7531	0.236797	-56.9312	1.10931		-60.4906	0.915241	-61.6625	0.648499	-59.5344	1.4246	-53.9875	1.07374	-61.0281	2.01044
		-54.7281	2.78692	-60.8156	1.60303	-52.7531	0.243473	-56.9312	1.10912		-60.4906	0.890446	-61.6625	0.601387	-59.5344	1.4431	-53.9875	1.02587	-61.0281	1.99833
		-54.3656	2.74019	-60.7	1.6202	-52.5375	0.250244	-56.8312	1.11036		-60.3719	0.865841	-61.5906	0.558472	-59.5375	1.46284	-53.9188	0.977802	-61.0156	1.98231
		-54.3656	2.69518	-60.7	1.63403	-52.5375	0.256348	-56.8312	1.11294		-60.3719	0.841141	-61.5906	0.521183	-59.5375	1.48268	-53.9188	0.929546	-61.0156	1.96228
		-54.2906	2.65217	-60.575	1.64471	-52.3438	0.261211	-56.7938	1.11713		-60.4312	0.816631	-61.6	0.49057	-59.4531	1.50099	-53.9906	0.881481	-60.8719	1.93892
		-54.2906	2.61135	-60.575	1.65195	-52.3438	0.265026	-56.7938	1.12247		-60.4312	0.792885	-61.6	0.466728	-59.4531	1.51653	-53.9906	0.834274	-60.8719	1.91231
		-54.3156	2.57301	-60.5969	1.65606	-52.4594	0.267887	-56.9062	1.12877		-60.3469	0.770473	-61.6	0.45042	-59.5156	1.52826	-53.8875	0.788593	-60.7437	1.88227
		-54.3156	2.53744	-60.5969	1.65749	-52.4594	0.269032	-56.9062	1.13573		-60.3469	0.749111	-61.6	0.442028	-59.5156	1.53437	-53.8875	0.74482	-60.7437	1.84917
		-54.1844	2.50463	-60.4156	1.65625	-52.5281	0.26865	-56.7938	1.14269		-60.275	0.72937	-61.7875	0.440979	-59.2938	1.53399	-53.7344	0.703526	-60.6875	1.8137
		-54.1844	2.47469	-60.4156	1.653	-52.5281	0.267029	-56.7938	1.14937		-60.275	0.711918	-61.7875	0.446701	-59.2938	1.52645	-53.7344	0.665474	-60.6875	1.77593
		-54.0344	2.44732	-60.3531	1.64795	-52.3031	0.264359	-56.8062	1.1549		-60.25	0.695801	-61.9594	0.458622	-59.2344	1.511	-53.8719	0.631237	-60.5219	1.73616
		-54.0344	2.42281	-60.3531	1.64137	-52.3031	0.260925	-56.8062	1.15891		-60.25	0.682163	-61.9594	0.475407	-59.2344	1.48773	-53.8719	0.601101	-60.5219	1.69477
		-53.9969	2.40088	-60.2875	1.63393	-52.5875	0.256634	-56.7	1.16091		-60.2781	0.671387	-61.8187	0.495911	-59.0625	1.45645	-53.9531	0.575256	-60.4781	1.65234
		-53.9969	2.38028	-60.2875	1.62544	-52.5875	0.252056	-56.7	1.16005		-60.2781	0.662231	-61.8187	0.51899	-59.0625	1.41783	-53.9531	0.55418	-60.4781	1.60894
		-54	2.36092	-60.4	1.61572	-52.5406	0.247669	-56.4406	1.15652		-60.2531	0.65546	-61.5187	0.542831	-58.7687	1.373	-53.8687	0.538063	-60.5625	1.56488
		-54	2.34241	-60.4	1.60522	-52.5406	0.243759	-56.4406	1.14985		-60.2531	0.650406	-61.5187	0.566292	-58.7687	1.32313	-53.8687	0.526619	-60.5625	1.52063
		-53.8937	2.32353	-60.3062	1.59349	-52.4531	0.240707	-56.5062	1.14002		-60.2313	0.6464	-61.5438	0.588226	-58.8062	1.26905	-53.8812	0.519657	-60.4594	1.47638
		-53.8937	2.30341	-60.3062	1.58005	-52.4531	0.238895	-56.5062	1.12724		-60.2313	0.64373	-61.5438	0.606728	-58.8062	1.21269	-53.8812	0.516701	-60.4594	1.43242
		-53.7	2.28119	-60.2375	1.56488	-52.4344	0.238991	-56.6437	1.11103		-60.2875	0.641441	-61.6562	0.62151	-58.95	1.15643	-53.8094	0.517273	-60.5187	1.38903
		-53.7	2.2562	-60.2375	1.54724	-52.4344	0.241566	-56.6437	1.09234		-60.2875	0.638485	-61.6562	0.631714	-58.95	1.1014	-53.8094	0.521183	-60.5187	1.3464
		-53.6281	2.2274	-60.1344	1.52674	-52.4688	0.246716	-56.3906	1.07164		-60.3125	0.634766	-61.5344	0.636292	-58.925	1.04923	-53.9844	0.527382	-60.3219	1.30444
		-53.6281	2.19364	-60.1344	1.50299	-52.4688	0.254917	-56.3906	1.04885		-60.3125	0.629997	-61.5344	0.635147	-58.925	1.00193	-53.9844	0.535297	-60.3219	1.2641
		-53.5812	2.15464	-59.9625	1.47572	-52.35	0.266743	-56.35	1.02482		-60.1937	0.623226	-61.4625	0.628185	-58.7938	0.96035	-53.8156	0.544357	-60.2656	1.22547
		-53.5812	2.10953	-59.9625	1.44453	-52.35	0.282478	-56.35	1.00012		-60.1937	0.614166	-61.4625	0.615788	-58.7938	0.925446	-53.8156	0.553513	-60.2656	1.18847
		-53.3969	2.05803	-59.9875	1.40972	-52.2875	0.302315	-56.2406	0.974941		-60.1156	0.602722	-61.5062	0.598431	-58.85	0.898075	-53.6031	0.562477	-60.0875	1.15376
		-53.3969	1.99995	-59.9875	1.37157	-52.2875	0.326538	-56.2406	0.949669		-60.1156	0.588989	-61.5062	0.576305	-58.85	0.878716	-53.6031	0.570488	-60.0875	1.12114
		-53.3344	1.9351	-59.9281	1.33028	-52.425	0.355053	-56.3	0.925159		-60.0219	0.572872	-61.4188	0.550365	-58.8781	0.866985	-53.7656	0.577068	-60.0406	1.09129
		-53.3344	1.86405	-59.9281	1.28689	-52.425	0.387573	-56.3	0.901604		-60.0219	0.554848	-61.4188	0.521469	-58.8781	0.862789	-53.7656	0.581837	-60.0406	1.06459
		-53.2437	1.7868	-59.8187	1.24168	-52.4688	0.423717	-56.4562	0.878716		-59.9312	0.535583	-61.3875	0.490284	-58.9594	0.865364	-53.6625	0.584126	-60.2562	1.04065
		-53.2437	1.70403	-59.8187	1.1961	-52.4688	0.462818	-56.4562	0.857162		-59.9312	0.515079	-61.3875	0.458241	-58.9594	0.873947	-53.6625	0.583744	-60.2562	1.02015
		-53.15	1.61705	-59.6937	1.15118	-52.4594	0.504398	-56.3844	0.836945		-59.9625	0.494194	-61.3062	0.425911	-58.7781	0.88768	-53.7437	0.580597	-60.2625	1.00288
		-53.15	1.52664	-59.6937	1.10779	-52.4594	0.547123	-56.3844	0.818062		-59.9625	0.474072	-61.3062	0.394058	-58.7781	0.904846	-53.7437	0.574112	-60.2625	0.98877
		-53.0875	1.43375	-59.7313	1.06726	-52.5312	0.589657	-56.225	0.800419		-60.1219	0.455189	-61.4062	0.363445	-58.6688	0.924587	-53.7844	0.564575	-60.1469	0.977898
		-53.0875	1.33963	-59.7313	1.03102	-52.5312	0.631142	-56.225	0.784016		-60.1219	0.438404	-61.4062	0.334835	-58.6688	0.945377	-53.7844	0.551987	-60.1469	0.969791
		-52.9219	1.24569	-59.6406	0.999451	-52.4	0.669861	-56.1656	0.769138		-60.0344	0.424385	-61.4	0.3088	-58.85	0.965977	-53.5906	0.53606	-59.9875	0.964165
		-52.9219	1.1528	-59.6406	0.97332	-52.4	0.704384	-56.1656	0.755215		-60.0344	0.414181	-61.4	0.285339	-58.85	0.985241	-53.5906	0.516796	-59.9875	0.960922
		-52.9688	1.06249	-59.6344	0.953484	-52.2	0.733662	-56.0594	0.742626		-60.0062	0.408077	-61.3906	0.265121	-58.6969	1.00222	-53.5281	0.494862	-60.025	0.959778
		-52.9688	0.9758	-59.6344	0.939941	-52.2	0.756073	-56.0594	0.731373		-60.0062	0.406456	-61.3906	0.248337	-58.6969	1.01604	-53.5281	0.470448	-60.025	0.959969
		-53.0219	0.893402	-59.825	0.932884	-52.4281	0.77076	-56.1031	0.721264		-60.0219	0.409603	-61.4406	0.234699	-58.5	1.02625	-53.5719	0.443363	-60.025	0.961304
		-53.0219	0.816441	-59.825	0.931263	-52.4281	0.776863	-56.1031	0.712585		-60.0219	0.417519	-61.4406	0.224018	-58.5	1.03235	-53.5719	0.414371	-60.025	0.963688
		-53.0406	0.745201	-59.775	0.935173	-52.2844	0.77343	-56.2625	0.705051		-60.0156	0.43087	-61.3531	0.216293	-58.475	1.03416	-53.6	0.383949	-59.9156	0.966644
		-53.0406	0.680161	-59.775	0.94347	-52.2844	0.760269	-56.2625	0.698853		-60.0156	0.448418	-61.3531	0.21162	-58.475	1.03254	-53.6	0.352383	-59.9156	0.970268
		-53.0031	0.621414	-59.75	0.954819	-52.0938	0.737953	-56.1688	0.694084		-60.0531	0.470448	-61.3687	0.209427	-58.5625	1.02673	-53.525	0.320148	-59.8563	0.974274
		-53.0031	0.568867	-59.75	0.96817	-52.0938	0.7061	-56.1688	0.690651		-60.0531	0.496483	-61.3687	0.209522	-58.5625	1.01786	-53.525	0.287819	-59.8563	0.978661
		-52.9594	0.522327	-59.5531	0.982189	-51.9344	0.665379	-55.9375	0.688648		-59.8937	0.524521	-61.5344	0.211716	-58.5406	1.00679	-53.4562	0.255871	-60.0594	0.983906
		-52.9594	0.481319	-59.5531	0.995827	-51.9344	0.617599	-55.9375	0.687695		-59.8937	0.555038	-61.5344	0.215816	-58.5406	0.993729	-53.4562	0.224781	-60.0594	0.989914
		-52.8563	0.445175	-59.6	1.00746	-52.0094	0.563335	-56.0125	0.687599		-59.8844	0.5867	-61.2594	0.221729	-58.3844	0.980282	-53.5344	0.194836	-59.8625	0.997066
		-52.8563	0.413227	-59.6	1.01643	-52.0094	0.504303	-56.0125	0.688457		-59.8844	0.617981	-61.2594	0.229073	-58.3844	0.96674	-53.5344	0.166416	-59.8625	1.00555
		-52.9844	0.384521	-59.5625	1.02177	-52.1156	0.442028	-56.1156	0.690079		-60.0875	0.648117	-61.275	0.237942	-58.3031	0.954151	-53.575	0.139713	-59.6437	1.01576
		-52.9844	0.358105	-59.5625	1.02282	-52.1156	0.378227	-56.1156	0.691795		-60.0875	0.675964	-61.275	0.24786	-58.3031	0.943279	-53.575	0.115108	-59.6437	1.02806
		-53.0906	0.333118	-59.425	1.01948	-52	0.314903	-56.1406	0.693798		-59.8937	0.700188	-61.2687	0.258827	-58.2625	0.93441	-53.5312	0.0925064	-59.5812	1.04246
		-53.0906	0.308323	-59.425	1.01099	-52	0.253487	-56.1406	0.695896		-59.8937	0.719547	-61.2687	0.270939	-58.2625	0.927925	-53.5312	0.0718117	-59.5812	1.05896
		-52.9094	0.283146	-59.3	0.997734	-52.0531	0.195885	-55.8656	0.697327		-59.9688	0.733471	-61.4	0.283813	-58.1844	0.92411	-53.4281	0.053215	-59.65	1.07727
		-52.9094	0.25692	-59.3	0.980949	-52.0531	0.143528	-55.8656	0.698185		-59.9688	0.740719	-61.4	0.297356	-58.1844	0.922871	-53.4281	0.0366211	-59.65	1.09701
		-52.7844	0.228786	-59.2844	0.960636	-51.9719	0.097847	-55.9281	0.698185		-59.8594	0.741196	-61.3187	0.310993	-58.3375	0.923538	-53.6688	0.0214577	-59.8438	1.11761
		-52.7844	0.19846	-59.2844	0.937271	-51.9719	0.0597	-55.9281	0.697327		-59.8594	0.734329	-61.3187	0.324535	-58.3375	0.925636	-53.6688	0.00772476	-59.8438	1.1384
		-52.8781	0.165653	-59.1906	0.912476	-51.9281	0.02985	-55.8812	0.695229		-59.775	0.719547	-61.4	0.337887	-58.4531	0.928593	-53.65	-0.00457764	-59.7313	1.15871
		-52.8781	0.130177	-59.1906	0.886917	-51.9281	0.00867844	-55.8812	0.692368		-59.775	0.697517	-61.4	0.350571	-58.4531	0.930977	-53.65	-0.015831	-59.7313	1.17683
		-52.9875	0.0923157	-59.2437	0.861645	-52.2906	-0.00391006	-55.9406	0.688648		-59.6	0.668335	-61.3344	0.361824	-58.4688	0.932121	-53.5	-0.0264168	-59.7406	1.19181
		-52.9875	0.0520706	-59.2437	0.837708	-52.2906	-0.0079155	-55.9406	0.68388		-59.6	0.632858	-61.3344	0.37117	-58.4688	0.931168	-53.5	-0.0364304	-59.7406	1.20287
		-52.8281	0.00991821	-59.3375	0.815678	-52.2219	-0.0041008	-55.8187	0.67873		-59.5687	0.591755	-61.3156	0.378418	-58.175	0.926208	-53.5406	-0.0460625	-59.5844	1.2085
		-52.8281	-0.0335693	-59.3375	0.796127	-52.2219	0.00658035	-55.8187	0.672913		-59.5687	0.545883	-61.3156	0.382996	-58.175	0.916672	-53.5406	-0.0555992	-59.5844	1.20783
		-52.75	-0.0778198	-59.3062	0.78001	-52.0719	0.0227928	-55.8625	0.666904		-59.5594	0.496578	-61.2	0.384617	-58.1	0.902176	-53.3875	-0.0649452	-59.4625	1.19991
		-52.75	-0.121689	-59.3062	0.767708	-52.0719	0.0432014	-55.8625	0.660801		-59.5594	0.445461	-61.2	0.382996	-58.1	0.881958	-53.3875	-0.074482	-59.4625	1.1838
		-52.7844	-0.164986	-59.2281	0.75922	-52.0219	0.0663757	-55.6344	0.654793		-59.7	0.393677	-61.2062	0.377941	-57.9969	0.855446	-53.4375	-0.0843048	-59.3656	1.15929
		-52.7844	-0.207138	-59.2281	0.754642	-52.0219	0.0901222	-55.6344	0.649548		-59.7	0.341892	-61.2062	0.369263	-57.9969	0.82283	-53.4375	-0.0946999	-59.3656	1.12638
		-52.8406	-0.246906	-59.1187	0.753307	-52.2594	0.113106	-55.7656	0.64497		-59.6406	0.292397	-61.15	0.35677	-57.9188	0.784302	-53.6875	-0.105762	-59.2469	1.08509
		-52.8406	-0.283909	-59.1187	0.755596	-52.2594	0.133514	-55.7656	0.64106		-59.6406	0.246239	-61.15	0.340939	-57.9188	0.740337	-53.6875	-0.117683	-59.2469	1.03588
		-52.9813	-0.31805	-59.1406	0.761032	-52.225	0.149632	-55.8719	0.638008		-59.6031	0.203514	-61.2531	0.32196	-57.9594	0.691795	-53.625	-0.130939	-59.1187	0.979137
		-52.9813	-0.348568	-59.1406	0.768089	-52.225	0.160408	-55.8719	0.636101		-59.6031	0.165749	-61.2531	0.300026	-57.9594	0.639725	-53.625	-0.145435	-59.1187	0.9161
		-52.9562	-0.375271	-59.1	0.776863	-52.2125	0.164413	-55.8156	0.635338		-59.65	0.13361	-61.15	0.275612	-57.8812	0.585079	-53.5938	-0.16098	-59.2	0.847816
		-52.9562	-0.39854	-59.1	0.786591	-52.2125	0.160789	-55.8156	0.635719		-59.65	0.106812	-61.15	0.249577	-57.8812	0.528908	-53.5938	-0.17786	-59.2	0.776005
		-53.0031	-0.418186	-59.2156	0.796318	-52	0.148964	-55.6906	0.63715		-59.6625	0.0863075	-61.1781	0.222492	-57.95	0.473022	-53.5875	-0.196362	-59.2313	0.702095
		-53.0031	-0.434303	-59.2156	0.805569	-52	0.129223	-55.6906	0.639153		-59.6625	0.0717163	-61.1781	0.195026	-57.95	0.418091	-53.5875	-0.215912	-59.2313	0.626945
		-52.9844	-0.447178	-59.0687	0.813198	-51.8594	0.101852	-55.6187	0.641823		-59.6156	0.062561	-61.1437	0.167656	-58.0375	0.365639	-53.5844	-0.23632	-59.1625	0.552559
		-52.9844	-0.457287	-59.0687	0.819016	-51.8594	0.0675201	-55.6187	0.644875		-59.6156	0.0583649	-61.1437	0.141335	-58.0375	0.316715	-53.5844	-0.257683	-59.1625	0.480461
		-53.05	-0.464916	-59.0562	0.822735	-52.0125	0.0274658	-55.5031	0.647926		-59.6906	0.0589371	-61.0656	0.117493	-57.8438	0.271797	-53.5125	-0.279236	-59.2281	0.411987
		-53.05	-0.470543	-59.0562	0.823784	-52.0125	-0.0169754	-55.5031	0.650406		-59.6906	0.0638962	-61.0656	0.096035	-57.8438	0.231647	-53.5125	-0.300407	-59.2281	0.348377
		-52.9531	-0.474644	-58.9906	0.82159	-51.9062	-0.0639915	-55.7188	0.652027		-59.85	0.071907	-61.1	0.0778198	-57.9094	0.196648	-53.5312	-0.320816	-59.1844	0.291252
		-52.9531	-0.477219	-58.9906	0.816727	-51.9062	-0.111771	-55.7188	0.652504		-59.85	0.0825882	-61.1	0.0637054	-57.9094	0.167274	-53.5312	-0.33989	-59.1844	0.24128
		-53.0438	-0.479221	-58.9219	0.809097	-51.9	-0.158119	-55.65	0.651073		-59.7031	0.0952721	-61.2687	0.0534058	-57.9937	0.143337	-53.4719	-0.357342	-59.0781	0.198841
		-53.0438	-0.480652	-58.9219	0.798893	-51.9	-0.200939	-55.65	0.647449		-59.7031	0.109386	-61.2687	0.0476837	-57.9937	0.124168	-53.4719	-0.37241	-59.0781	0.165176
		-53.0625	-0.481701	-58.8469	0.786304	-52.0781	-0.238419	-55.5812	0.641155		-59.6	0.124264	-61.1531	0.0469208	-57.9844	0.109863	-53.5	-0.384712	-59.1531	0.140572
		-53.0625	-0.482941	-58.8469	0.772095	-52.0781	-0.26865	-55.5812	0.631809		-59.6	0.139332	-61.1531	0.0504494	-57.9844	0.0998497	-53.5	-0.394154	-59.1531	0.124741
		-53	-0.484276	-58.8656	0.757027	-52.025	-0.290203	-55.6219	0.619221		-59.5062	0.154305	-61.0469	0.058651	-57.9875	0.093174	-53.75	-0.400734	-59.175	0.117683
		-53	-0.485897	-58.8656	0.741005	-52.025	-0.302029	-55.6219	0.603294		-59.5062	0.168896	-61.0469	0.0709534	-57.9875	0.0898361	-53.75	-0.404644	-59.175	0.1194
		-53.1469	-0.487709	-58.775	0.725079	-52.025	-0.302982	-55.5312	0.584412		-59.65	0.182724	-61.2656	0.0864983	-58.0469	0.088501	-53.8563	-0.405884	-59.2812	0.129223
		-53.1469	-0.490189	-58.775	0.709534	-52.025	-0.292778	-55.5312	0.562668		-59.65	0.195599	-61.2656	0.105286	-58.0469	0.0886917	-53.8563	-0.405025	-59.2812	0.145817
		-53.1656	-0.493622	-58.7594	0.695038	-52.2219	-0.271702	-55.45	0.53854		-59.7719	0.207901	-61.3312	0.126171	-57.9	0.0899315	-53.7781	-0.402832	-59.3187	0.168514
		-53.1656	-0.497532	-58.7594	0.681591	-52.2219	-0.240135	-55.45	0.512791		-59.7719	0.218868	-61.3312	0.148487	-57.9	0.0906944	-53.7781	-0.39978	-59.3187	0.196648
		-53.1312	-0.50211	-58.7906	0.669861	-52.25	-0.199127	-55.4156	0.485897		-59.5469	0.228214	-61.2375	0.171375	-57.9344	0.0915527	-53.7031	-0.396729	-59.1875	0.2285
		-53.1312	-0.507736	-58.7906	0.659657	-52.25	-0.149727	-55.4156	0.45929		-59.5469	0.236034	-61.2375	0.193596	-57.9344	0.0919342	-53.7031	-0.39444	-59.1875	0.262737
		-53.0812	-0.51384	-58.9281	0.650692	-52.2	-0.0934601	-55.3344	0.433636		-59.5469	0.242138	-61.1844	0.214958	-57.8062	0.0907898	-53.6625	-0.393486	-59.2406	0.298119
		-53.0812	-0.52042	-58.9281	0.643158	-52.2	-0.0324249	-55.3344	0.41008		-59.5469	0.246525	-61.1844	0.234509	-57.8062	0.0885963	-53.6625	-0.394344	-59.2406	0.332832
		-53.1344	-0.527763	-58.7812	0.636578	-52.3875	0.0317574	-55.3	0.389481		-59.6406	0.248814	-61.0812	0.251102	-57.9719	0.0854492	-53.7719	-0.397491	-59.3156	0.366211
		-53.1344	-0.535393	-58.7812	0.630665	-52.3875	0.0973701	-55.3	0.372791		-59.6406	0.249004	-61.0812	0.264263	-57.9719	0.0807762	-53.7719	-0.4035	-59.3156	0.396919
		-53.3094	-0.543118	-58.6906	0.624657	-52.3219	0.162315	-55.3031	0.361347		-59.6375	0.246525	-61.0375	0.273705	-58.05	0.0746727	-53.7469	-0.412273	-59.2062	0.423813
		-53.3094	-0.550747	-58.6906	0.618267	-52.3219	0.225067	-55.3031	0.355244		-59.6375	0.24147	-61.0375	0.278568	-58.05	0.0674248	-53.7469	-0.424004	-59.2062	0.446033
		-53.2344	-0.557709	-58.7313	0.611019	-52.25	0.284195	-55.3844	0.354862		-59.7	0.233841	-61.0875	0.278473	-57.9281	0.0591278	-53.7437	-0.438118	-59.1344	0.462818
		-53.2344	-0.563812	-58.7313	0.602436	-52.25	0.338459	-55.3844	0.360489		-59.7	0.223255	-61.0875	0.274181	-57.9281	0.0501633	-53.7437	-0.454235	-59.1344	0.474262
		-53.2125	-0.568295	-58.7781	0.592136	-51.9344	0.387096	-55.725	0.372124		-59.5125	0.210381	-61.15	0.265217	-57.7875	0.0409126	-53.6656	-0.472069	-58.9781	0.479794
		-53.2125	-0.570774	-58.7781	0.580025	-51.9344	0.42963	-55.725	0.389385		-59.5125	0.195312	-61.15	0.251389	-57.7875	0.0310898	-53.6656	-0.490761	-58.9781	0.479984
		-53.1406	-0.570869	-58.625	0.565434	-51.9937	0.465584	-55.5312	0.41151		-59.4312	0.178051	-61.1562	0.23365	-57.8406	0.0205994	-53.65	-0.510025	-58.9813	0.47493
		-53.1406	-0.567913	-58.625	0.548744	-51.9937	0.494766	-55.5312	0.437927		-59.4312	0.15974	-61.1562	0.212479	-57.8406	0.0104904	-53.65	-0.529099	-58.9813	0.464821
		-53.2188	-0.562	-58.4531	0.529861	-52.0219	0.51775	-55.3812	0.468063		-59.5687	0.140381	-61.0938	0.187778	-57.9219	0.000190735	-53.7469	-0.547314	-59.1219	0.450993
		-53.2188	-0.55275	-58.4531	0.508976	-52.0219	0.534725	-55.3812	0.500393		-59.5687	0.120926	-61.0938	0.161076	-57.9219	-0.0103951	-53.7469	-0.56448	-59.1219	0.433731
		-53.4344	-0.539589	-58.5312	0.486565	-52.0156	0.545883	-55.3844	0.534153		-59.4656	0.102234	-60.9813	0.133133	-57.9719	-0.0206947	-53.9562	-0.58012	-58.9625	0.413799
		-53.4344	-0.522804	-58.5312	0.462914	-52.0156	0.551796	-55.3844	0.568867		-59.4656	0.0845909	-60.9813	0.104618	-57.9719	-0.0309944	-53.9562	-0.593948	-58.9625	0.392437
		-53.2406	-0.503349	-58.6375	0.438595	-51.9	0.55294	-55.4	0.603199		-59.4375	0.0693321	-60.9125	0.0764847	-57.9656	-0.0414848	-53.9937	-0.605965	-58.9469	0.369835
		-53.2406	-0.481033	-58.6375	0.413609	-51.9	0.549889	-55.4	0.636196		-59.4375	0.0569344	-60.9125	0.0497818	-57.9656	-0.0514984	-53.9937	-0.616169	-58.9469	0.346375
		-53.3875	-0.456333	-58.6094	0.388813	-52.0281	0.543308	-55.25	0.667381		-59.4656	0.0481606	-60.9875	0.0259399	-58	-0.0616074	-53.9844	-0.624657	-58.9156	0.323296
		-53.3875	-0.430584	-58.6094	0.364685	-52.0281	0.532913	-55.25	0.696278		-59.4656	0.0427246	-60.9875	0.00495911	-58	-0.0712395	-53.9844	-0.631905	-58.9156	0.300503
		-53.5875	-0.404453	-58.5125	0.341606	-52.15	0.518894	-55.2219	0.722122		-59.625	0.0412941	-61.0469	-0.0119209	-57.9188	-0.0798225	-53.8625	-0.637817	-59.0719	0.27771
		-53.5875	-0.378799	-58.5125	0.319576	-52.15	0.50211	-55.2219	0.744629		-59.625	0.0444412	-61.0469	-0.024128	-57.9188	-0.0876427	-53.8625	-0.642681	-59.0719	0.255299
		-53.5094	-0.354767	-58.6219	0.299358	-52.1344	0.482559	-55.2531	0.763416		-59.6375	0.0512123	-61.1156	-0.0313759	-57.85	-0.0939369	-53.8563	-0.647259	-59.0656	0.233269
		-53.5094	-0.333595	-58.6219	0.280762	-52.1344	0.459957	-55.2531	0.778198		-59.6375	0.061512	-61.1156	-0.0328064	-57.85	-0.0983238	-53.8563	-0.651073	-59.0656	0.21162
		-53.4094	-0.316143	-58.4188	0.263882	-51.7906	0.434971	-55.125	0.788975		-59.6156	0.0749588	-61.0719	-0.0292778	-57.9437	-0.100327	-53.9906	-0.654507	-59.0844	0.18959
		-53.4094	-0.302982	-58.4188	0.248909	-51.7906	0.407887	-55.125	0.795269		-59.6156	0.0908852	-61.0719	-0.0210762	-57.9437	-0.0995636	-53.9906	-0.658035	-59.0844	0.166798
		-53.4062	-0.295067	-58.4469	0.235653	-51.8375	0.37899	-55.2875	0.797081		-59.5719	0.108528	-61.1844	-0.00782013	-57.7938	-0.0951767	-53.8937	-0.661469	-58.9937	0.143433
		-53.4062	-0.292969	-58.4469	0.224113	-51.8375	0.348568	-55.2875	0.794125		-59.5719	0.127029	-61.1844	0.00934601	-57.7938	-0.0867844	-53.8937	-0.664425	-58.9937	0.1194
		-53.4469	-0.296497	-58.6094	0.213909	-51.6937	0.317574	-55.25	0.786495		-59.5187	0.145245	-61.1375	0.0294685	-57.9219	-0.0743866	-54.1906	-0.667477	-58.8937	0.0940323
		-53.4469	-0.305939	-58.6094	0.205231	-51.6937	0.286674	-55.25	0.773907		-59.5187	0.162506	-61.1375	0.0516891	-57.9219	-0.0575066	-54.1906	-0.670052	-58.8937	0.0679016
		-53.2125	-0.320721	-58.6906	0.197411	-51.7781	0.256157	-55.1437	0.756168		-59.6312	0.178242	-61.0469	0.0747681	-57.9688	-0.0364304	-54.1094	-0.671673	-58.8312	0.0409126
		-53.2125	-0.340366	-58.6906	0.190163	-51.7781	0.227165	-55.1437	0.733662		-59.6312	0.191498	-61.0469	0.0976562	-57.9688	-0.011158	-54.1094	-0.672817	-58.8312	0.0132561
		-53.3187	-0.364304	-58.4906	0.183773	-51.95	0.200462	-55.0844	0.706196		-59.4969	0.201607	-61.2094	0.118923	-58.0031	0.0177383	-53.9594	-0.672913	-58.9312	-0.0141144
		-53.3187	-0.391579	-58.4906	0.178051	-51.95	0.176907	-55.0844	0.673962		-59.4969	0.207996	-61.2094	0.137329	-58.0031	0.0498772	-53.9594	-0.67215	-58.9312	-0.0411987
		-53.475	-0.421524	-58.4125	0.17271	-51.7938	0.156975	-54.8687	0.637245		-59.4781	0.210857	-61.1406	0.152206	-58.1125	0.0844955	-53.9562	-0.670338	-58.9781	-0.0671387
		-53.475	-0.452709	-58.4125	0.167847	-51.7938	0.141239	-54.8687	0.596333		-59.4781	0.21019	-61.1406	0.162411	-58.1125	0.119972	-53.9562	-0.667477	-58.9781	-0.0911713
		-53.5438	-0.484085	-58.4062	0.162983	-51.8969	0.130177	-54.8844	0.551891		-59.4594	0.205517	-61.0875	0.167179	-58.0812	0.155926	-54.15	-0.663662	-58.8687	-0.112343
		-53.5438	-0.514889	-58.4062	0.158215	-51.8969	0.124073	-54.8844	0.50478		-59.4594	0.197506	-61.0875	0.166035	-58.0812	0.191116	-54.15	-0.65937	-58.8687	-0.130272
		-53.4219	-0.544357	-58.4813	0.154305	-51.9906	0.122929	-55.0438	0.455666		-59.4688	0.186825	-60.9719	0.158501	-58.0375	0.224018	-54.2656	-0.654888	-58.9937	-0.144291
		-53.4219	-0.571918	-58.4813	0.150681	-51.9906	0.126839	-55.0438	0.405312		-59.4688	0.17395	-60.9719	0.144768	-58.0375	0.253963	-54.2656	-0.650311	-58.9937	-0.153542
		-53.3594	-0.596714	-58.5406	0.147438	-51.9188	0.135422	-54.9906	0.354862		-59.4281	0.159073	-60.975	0.125122	-57.9969	0.280094	-54.375	-0.646114	-59.0625	-0.157833
		-53.3594	-0.618744	-58.5406	0.144958	-51.9188	0.148296	-54.9906	0.305176		-59.4281	0.142956	-60.975	0.0998497	-57.9969	0.30098	-54.375	-0.6423	-59.0625	-0.156879
		-53.5094	-0.638199	-58.4906	0.143147	-51.8	0.165272	-54.8406	0.25692		-59.4656	0.126648	-60.9312	0.0699043	-57.8	0.316143	-54.325	-0.639248	-58.9656	-0.150585
		-53.5094	-0.654793	-58.4906	0.141716	-51.8	0.18568	-54.8406	0.211334		-59.4656	0.110531	-60.9312	0.0357628	-57.8	0.325298	-54.325	-0.637436	-58.9656	-0.139523
		-53.6875	-0.669003	-58.4937	0.141239	-51.9031	0.208759	-54.9281	0.169277		-59.4469	0.0953674	-60.9375	-0.00152588	-57.8156	0.328064	-54.1156	-0.636578	-59.05	-0.123215
		-53.6875	-0.68121	-58.4937	0.141716	-51.9031	0.233841	-54.9281	0.131416		-59.4469	0.0817299	-60.9375	-0.0405312	-57.8156	0.324345	-54.1156	-0.636864	-59.05	-0.102711
		-53.7656	-0.691986	-58.4469	0.14267	-51.95	0.260544	-54.9937	0.0986099		-59.3844	0.0692368	-61.025	-0.0800133	-57.7656	0.313854	-54.075	-0.638294	-59.0812	-0.0788689
		-53.7656	-0.701809	-58.4469	0.144958	-51.95	0.288391	-54.9937	0.070858		-59.3844	0.0581741	-61.025	-0.119209	-57.7656	0.297165	-54.075	-0.640488	-59.0812	-0.0516891
		-53.6719	-0.71106	-58.5	0.14801	-51.7562	0.316906	-54.9188	0.0487328		-59.4813	0.0490189	-61.0469	-0.156498	-57.9031	0.274658	-54.3812	-0.643158	-59	-0.023365
		-53.6719	-0.720406	-58.5	0.15192	-51.7562	0.345421	-54.9188	0.0323296		-59.4813	0.0408173	-61.0469	-0.190735	-57.9031	0.246525	-54.3812	-0.646019	-59	0.00553131
		-53.6437	-0.730038	-58.4344	0.156498	-51.7531	0.373745	-54.9844	0.0214577		-59.4875	0.0336647	-61.0375	-0.221157	-57.7969	0.213814	-54.2562	-0.64888	-59.0125	0.0343323
		-53.6437	-0.740051	-58.4344	0.161934	-51.7531	0.401688	-54.9844	0.0164032		-59.4875	0.0271797	-61.0375	-0.246334	-57.7969	0.177002	-54.2562	-0.651073	-59.0125	0.0614166
		-53.6063	-0.750637	-58.4437	0.168228	-51.9781	0.428867	-55.0062	0.0166893		-59.5344	0.0204086	-60.9656	-0.265598	-57.8438	0.136662	-54.2562	-0.652599	-59.2469	0.0860214
		-53.6063	-0.761604	-58.4437	0.174809	-51.9781	0.45557	-55.0062	0.0218391		-59.5344	0.0126839	-60.9656	-0.278664	-57.8438	0.0937462	-54.2562	-0.652885	-59.2469	0.107479
		-53.6281	-0.772762	-58.4656	0.181866	-51.8312	0.481606	-55.0594	0.0314713		-59.5344	0.00371933	-61	-0.285244	-57.875	0.0491142	-54.3594	-0.651741	-59.1	0.12455
		-53.6281	-0.783443	-58.4656	0.1894	-51.8312	0.506592	-55.0594	0.0453949		-59.5344	-0.00715256	-61	-0.284195	-57.875	0.0038147	-54.3594	-0.649166	-59.1	0.136948
		-53.7	-0.793457	-58.4406	0.19722	-51.7625	0.531101	-55.0969	0.0632286		-59.4937	-0.0206947	-61.1562	-0.276184	-57.8312	-0.0418663	-54.4656	-0.645351	-58.9656	0.144482
		-53.7	-0.802231	-58.4406	0.205135	-51.7625	0.555134	-55.0969	0.0842094		-59.4937	-0.0370979	-61.1562	-0.261974	-57.8312	-0.0871658	-54.4656	-0.640106	-58.9656	0.147057
		-53.7	-0.809097	-58.4062	0.212955	-51.6937	0.578022	-54.9375	0.108051		-59.5438	-0.0562668	-61.2219	-0.241089	-57.7437	-0.130558	-54.5438	-0.633335	-58.8187	0.144482
		-53.7	-0.813866	-58.4062	0.220203	-51.6937	0.599861	-54.9375	0.134563		-59.5438	-0.0780106	-61.2219	-0.2141	-57.7437	-0.171471	-54.5438	-0.625992	-58.8187	0.136662
		-53.8219	-0.815868	-58.4125	0.227356	-51.5812	0.620556	-54.9562	0.163174		-59.3219	-0.102425	-61.2219	-0.182533	-57.7313	-0.209236	-54.5281	-0.617886	-58.8906	0.124931
		-53.8219	-0.814915	-58.4125	0.233841	-51.5812	0.639439	-54.9562	0.193691		-59.3219	-0.128841	-61.2219	-0.147343	-57.7313	-0.242615	-54.5281	-0.609398	-58.8906	0.109673
		-53.8344	-0.810719	-58.5	0.239182	-51.6688	0.656223	-54.8937	0.225735		-59.3594	-0.156498	-61.0562	-0.109005	-57.8531	-0.271034	-54.4937	-0.601196	-58.9594	0.0911713
		-53.8344	-0.803566	-58.5	0.24395	-51.6688	0.670433	-54.8937	0.259018		-59.3594	-0.18425	-61.0562	-0.0691414	-57.8531	-0.294304	-54.4937	-0.593376	-58.9594	0.070858
		-53.9531	-0.793648	-58.4281	0.247574	-51.8438	0.681019	-54.9469	0.293446		-59.3625	-0.21143	-61.1031	-0.0289917	-57.8594	-0.31147	-54.3969	-0.586128	-59.05	0.0492096
		-53.9531	-0.78125	-58.4281	0.249863	-51.8438	0.687313	-54.9469	0.328445		-59.3625	-0.236511	-61.1031	0.0104904	-57.8594	-0.322151	-54.3969	-0.579548	-59.05	0.0267982
		-54.1094	-0.766945	-58.375	0.251293	-51.7281	0.688839	-54.9969	0.363541		-59.3469	-0.258732	-61.3937	0.0473976	-57.85	-0.326252	-54.45	-0.573921	-58.7781	0.00457764
		-54.1094	-0.751114	-58.375	0.251102	-51.7281	0.684643	-54.9969	0.39854		-59.3469	-0.277424	-61.3937	0.0810623	-57.85	-0.323582	-54.45	-0.569439	-58.7781	-0.0169754
		-54.0812	-0.734329	-58.3625	0.249863	-51.6625	0.674057	-55.0344	0.432968		-59.575	-0.291061	-61.1937	0.110435	-57.8937	-0.314808	-54.5062	-0.566101	-58.9437	-0.0374794
		-54.0812	-0.717545	-58.3625	0.24786	-51.6625	0.656796	-55.0344	0.466061		-59.575	-0.299549	-61.1937	0.134087	-57.8937	-0.300121	-54.5062	-0.563908	-58.9437	-0.0566483
		-53.8844	-0.701046	-58.3094	0.244617	-51.5438	0.632286	-54.9156	0.497341		-59.5938	-0.301933	-61.025	0.151348	-58.0875	-0.279903	-54.5094	-0.562572	-59.0656	-0.0743866
		-53.8844	-0.68512	-58.3094	0.240803	-51.5438	0.600529	-54.9156	0.526428		-59.5938	-0.297928	-61.025	0.162125	-58.0875	-0.254631	-54.5094	-0.561905	-59.0656	-0.0908852
		-53.9375	-0.67091	-58.3219	0.236416	-51.5	0.561523	-55.0062	0.552464		-59.5281	-0.288105	-60.9906	0.165367	-58.0687	-0.225639	-54.7687	-0.562477	-59.0812	-0.105953
		-53.9375	-0.658321	-58.3219	0.231075	-51.5	0.515938	-55.0062	0.574875		-59.5281	-0.27256	-60.9906	0.160885	-58.0687	-0.193977	-54.7687	-0.563908	-59.0812	-0.119877
		-53.9594	-0.647449	-58.3469	0.225639	-51.4406	0.464821	-54.8094	0.593376		-59.5938	-0.252056	-61.1031	0.149536	-58	-0.160408	-54.6187	-0.565815	-59.0375	-0.132942
		-53.9594	-0.63858	-58.3469	0.220394	-51.4406	0.408745	-54.8094	0.607491		-59.5938	-0.227547	-61.1031	0.131035	-58	-0.126457	-54.6187	-0.568867	-59.0375	-0.145626
		-54.0156	-0.631714	-58.35	0.214577	-51.325	0.349236	-54.8344	0.616932		-59.6469	-0.199795	-61.1125	0.105762	-58.0219	-0.0930786	-54.5312	-0.572777	-58.9813	-0.158405
		-54.0156	-0.627041	-58.35	0.208569	-51.325	0.28801	-54.8344	0.621319		-59.6469	-0.169563	-61.1125	0.0752449	-58.0219	-0.0617027	-54.5312	-0.57745	-58.9813	-0.170994
		-54.0969	-0.624084	-58.3594	0.202656	-51.3531	0.226402	-54.8031	0.620842		-59.6594	-0.138855	-61.0187	0.0401497	-57.9844	-0.0325203	-54.65	-0.582981	-58.9375	-0.183773
		-54.0969	-0.622559	-58.3594	0.196838	-51.3531	0.166035	-54.8031	0.615692		-59.6594	-0.108814	-61.0187	0.00143051	-57.9844	-0.00715256	-54.65	-0.589561	-58.9375	-0.19722
		-54.1906	-0.622463	-58.3187	0.190353	-51.3656	0.109005	-54.7437	0.605869		-59.5938	-0.080204	-60.9844	-0.0394821	-57.9	0.0135422	-54.6719	-0.597572	-58.925	-0.210571
		-54.1906	-0.623417	-58.3187	0.183964	-51.3656	0.0566483	-54.7437	0.592136		-59.5938	-0.0540733	-60.9844	-0.0814438	-57.9	0.0294685	-54.6719	-0.606632	-58.925	-0.223923
		-54.1375	-0.624943	-58.35	0.177383	-51.4031	0.0107765	-54.6594	0.57497		-59.6688	-0.0311852	-60.9719	-0.122929	-57.8469	0.0398636	-54.7	-0.616741	-59.0438	-0.237465
		-54.1375	-0.627518	-58.35	0.169849	-51.4031	-0.0277519	-54.6594	0.554657		-59.6688	-0.0125885	-60.9719	-0.162697	-57.8469	0.0449181	-54.7	-0.627899	-59.0438	-0.250435
		-54.1469	-0.631142	-58.3	0.162029	-51.5906	-0.0579834	-54.6094	0.532341		-59.575	0.00143051	-61.0281	-0.199509	-57.8844	0.0440598	-54.7719	-0.640011	-58.9719	-0.262356
		-54.1469	-0.635242	-58.3	0.154305	-51.5906	-0.0790596	-54.6094	0.508785		-59.575	0.0110626	-61.0281	-0.232124	-57.8844	0.0376701	-54.7719	-0.652885	-58.9719	-0.272942
		-54.0906	-0.640106	-58.325	0.146198	-51.5156	-0.0914574	-54.7562	0.484467		-59.4813	0.0165939	-61.025	-0.260067	-58.075	0.026226	-54.75	-0.665951	-59.0469	-0.281906
		-54.0906	-0.645924	-58.325	0.137615	-51.5156	-0.0953674	-54.7562	0.460434		-59.4813	0.0179291	-61.025	-0.282669	-58.075	0.0102043	-54.75	-0.678921	-59.0469	-0.289154
		-54.175	-0.653076	-58.25	0.129509	-51.3969	-0.091362	-54.7031	0.43726		-59.4406	0.0161171	-61.0812	-0.299072	-58.0562	-0.00991821	-54.7094	-0.691509	-59	-0.293636
		-54.175	-0.661469	-58.25	0.121593	-51.3969	-0.080204	-54.7031	0.415325		-59.4406	0.0115395	-61.0812	-0.309372	-58.0562	-0.0332832	-54.7094	-0.702763	-59	-0.295448
		-54.15	-0.671196	-58.2875	0.11425	-51.8	-0.0635147	-54.5656	0.395393		-59.4937	0.004673	-61.1281	-0.313473	-57.875	-0.0585556	-54.7	-0.712299	-59.0312	-0.294685
		-54.15	-0.682354	-58.2875	0.107956	-51.8	-0.0430107	-54.5656	0.377655		-59.4937	-0.00267029	-61.1281	-0.311661	-57.875	-0.084877	-54.7	-0.719357	-59.0312	-0.291157
		-54.2875	-0.694466	-58.2	0.103283	-51.6656	-0.0204086	-54.6156	0.362015		-59.5187	-0.0106812	-61.3	-0.304413	-57.7375	-0.111198	-54.8375	-0.722885	-59.175	-0.284672
		-54.2875	-0.707245	-58.2	0.101089	-51.6656	0.00267029	-54.6156	0.348568		-59.5187	-0.0182152	-61.3	-0.29192	-57.7375	-0.135994	-54.8375	-0.722599	-59.175	-0.275135
		-54.5406	-0.719643	-58.25	0.102234	-51.55	0.0243187	-54.7469	0.337124		-59.5187	-0.0236511	-61.3438	-0.274944	-57.7656	-0.157833	-54.8469	-0.717545	-59.1937	-0.262928
		-54.5406	-0.730038	-58.25	0.107193	-51.55	0.0422478	-54.7469	0.327396		-59.5187	-0.0266075	-61.3438	-0.253963	-57.7656	-0.175476	-54.8469	-0.706291	-59.1937	-0.247383
		-54.4312	-0.736332	-58.2938	0.117493	-51.5781	0.0545502	-54.65	0.318336		-59.5875	-0.0256538	-61.1781	-0.228596	-57.95	-0.187397	-54.925	-0.687981	-59.1125	-0.228691
		-54.4312	-0.73576	-58.2938	0.13504	-51.5781	0.0592232	-54.65	0.30899		-59.5875	-0.0198364	-61.1781	-0.198555	-57.95	-0.191212	-54.925	-0.661469	-59.1125	-0.20628
		-53.9937	-0.724888	-58.375	0.161934	-51.5094	0.0541687	-54.6812	0.298595		-59.6094	-0.00743866	-61.2094	-0.163555	-57.9781	-0.185299	-54.9594	-0.624752	-59.0844	-0.178909
		-53.9937	-0.699139	-58.375	0.200748	-51.5094	0.0370026	-54.6812	0.285244		-59.6094	0.0134468	-61.2094	-0.122452	-57.9781	-0.167561	-54.9594	-0.576305	-59.0844	-0.145626
		-54.1781	-0.653172	-58.3344	0.254154	-51.4219	0.00495911	-54.5625	0.267029		-59.7781	0.0451088	-61.1125	-0.0729561	-58.0906	-0.135136	-55.0281	-0.51384	-59.25	-0.104904
		-54.1781	-0.58136	-58.3344	0.326252	-51.4219	-0.0445366	-54.5625	0.241756		-59.7781	0.0905037	-61.1125	-0.0126839	-58.0906	-0.0852585	-55.0281	-0.43478	-59.25	-0.0541687
		-54.3844	-0.477314	-58.3469	0.421619	-51.3219	-0.115013	-54.6312	0.206661		-59.6406	0.152874	-61.0812	0.0614166	-58.1344	-0.0146866	-55.0875	-0.336266	-58.9437	0.00925064
		-54.3844	-0.334644	-58.3469	0.545216	-51.3219	-0.210762	-54.6312	0.158596		-59.6406	0.236225	-61.0812	0.152969	-58.1344	0.0795364	-55.0875	-0.215244	-58.9437	0.0884056
		-54.4969	-0.147533	-58.1906	0.702286	-51.2969	-0.336361	-54.5656	0.0938416		-59.55	0.344372	-61.2375	0.266171	-58.0156	0.201225	-54.9312	-0.0685692	-59.0781	0.186825
		-54.4969	0.0890732	-58.1906	0.897884	-51.2969	-0.497246	-54.5656	0.0084877		-59.55	0.481606	-61.2375	0.405312	-58.0156	0.353813	-54.9312	0.107288	-59.0781	0.308037
		-54.4813	0.37775	-58.1531	1.13773	-51.4969	-0.699329	-54.4688	-0.102043		-59.4	0.651932	-61.1906	0.574589	-57.9969	0.53997	-54.975	0.315094	-59.2594	0.455284
		-54.4813	0.718498	-58.1531	1.42603	-51.4969	-0.948906	-54.4688	-0.242043		-59.4	0.858212	-61.1906	0.77734	-57.9969	0.762081	-54.975	0.557137	-59.2594	0.631523
		-54.5375	1.1076	-58.3281	1.76563	-51.8187	-1.25246	-54.5969	-0.416183		-59.4375	1.10302	-61.2094	1.01557	-58.0406	1.02139	-55.2	0.834179	-59.2313	0.838852
		-54.5375	1.53599	-58.3281	2.15778	-51.8187	-1.6161	-54.5969	-0.628567		-59.4375	1.38617	-61.2094	1.29013	-58.0406	1.31683	-55.2	1.14498	-59.2313	1.07775
		-54.6969	1.98889	-58.3812	2.6001	-51.3531	-2.04496	-54.5187	-0.882435		-59.4937	1.70507	-61.1625	1.59874	-57.9969	1.64557	-55.2	1.48687	-59.0969	1.34649
		-54.6969	2.44503	-58.3812	3.08752	-51.3531	-2.54221	-54.5187	-1.18017		-59.4937	2.05469	-61.1625	1.93701	-57.9969	2.00157	-55.2	1.85366	-59.0969	1.64118
		-54.7781	2.876	-58.2	3.61023	-51.3875	-3.10831	-54.6219	-1.52216		-59.5375	2.42596	-61.2812	2.29683	-58.0844	2.37589	-55.0094	2.23627	-59.0594	1.95503
		-54.7781	3.24612	-58.2	4.15344	-51.3875	-3.7405	-54.6219	-1.90697		-59.5375	2.80647	-61.2812	2.66552	-58.0844	2.75631	-55.0094	2.62146	-59.0594	2.27766
		-54.7469	3.51362	-58.1562	4.69818	-51.4656	-4.43201	-54.5125	-2.33002		-59.7687	3.17945	-61.2062	3.02782	-58.0125	3.12586	-54.9312	2.99301	-59.0062	2.59581
		-54.7469	3.63216	-58.1562	5.22022	-51.4656	-5.17015	-54.5125	-2.78387		-59.7687	3.5243	-61.2062	3.36409	-58.0125	3.46489	-54.9312	3.33109	-59.0062	2.89288
		-54.6281	3.55186	-58.1531	5.69067	-51.6344	-5.93662	-54.5438	-3.25756		-59.6969	3.81737	-61.2	3.65162	-57.9562	3.75051	-55	3.61195	-59.2687	3.14894
		-54.6281	3.22351	-58.1531	6.07758	-51.6344	-6.7071	-54.5438	-3.73592		-59.6969	4.03252	-61.2	3.86534	-57.9562	3.95746	-55	3.81079	-59.2687	3.34234
		-54.675	2.60096	-58.2094	6.3468	-51.5594	-7.45106	-54.3	-4.20103		-59.85	4.14295	-61.1125	3.97863	-58.0187	4.05979	-55.0438	3.90177	-59.3344	3.45001
		-54.675	1.64557	-58.2094	6.4641	-51.5594	-8.13227	-54.3	-4.63133		-59.85	4.12188	-61.1125	3.96595	-58.0187	4.03175	-55.0438	3.85895	-59.3344	3.44906
		-54.7437	0.331497	-58.2656	6.39687	-51.5687	-8.70972	-54.4531	-5.00164		-59.65	3.94526	-61.3594	3.80335	-58.0125	3.85046	-55.0687	3.65925	-59.2031	3.3186
		-54.7437	-1.35145	-58.2656	6.11668	-51.5687	-9.13906	-54.4531	-5.28593		-59.65	3.59364	-61.3594	3.47166	-58.0125	3.49665	-55.0687	3.28436	-59.2031	3.04136
		-54.6969	-3.39375	-58.3125	5.60246	-51.6562	-9.37452	-54.575	-5.45759		-59.6219	3.05395	-61.4344	2.95753	-58.0875	2.95773	-55.2125	2.72179	-59.2	2.60458
		-54.6969	-5.76239	-58.3125	4.84266	-51.6562	-9.37233	-54.575	-5.49002		-59.6219	2.32124	-61.4344	2.25544	-58.0875	2.2296	-55.2125	1.96772	-59.2	2.00214
		-54.7625	-8.39901	-58.2188	3.83682	-51.7188	-9.09224	-54.6688	-5.35889		-59.4656	1.40076	-61.4156	1.37033	-58.1844	1.3175	-55.2281	1.02787	-59.1312	1.23777
		-54.7625	-11.2208	-58.2188	2.59724	-51.7188	-8.50029	-54.6688	-5.04456		-59.4656	0.308895	-61.4156	0.317574	-58.1844	0.237846	-55.2281	-0.0811577	-59.1312	0.323677
		-54.8281	-14.1206	-58.25	1.1507	-51.4844	-7.57341	-54.5125	-4.53348		-59.35	-0.926685	-61.3312	-0.876808	-58.2188	-0.982189	-55.0812	-1.33085	-59.2062	-0.718021
		-54.8281	-16.9709	-58.25	-0.461864	-51.4844	-6.30064	-54.5125	-3.8188		-59.35	-2.26679	-61.3312	-2.17571	-58.2188	-2.3035	-55.0812	-2.6824	-59.2062	-1.85499
		-54.6719	-19.6298	-58.2938	-2.18735	-51.3062	-4.68569	-54.3844	-2.90241		-59.5125	-3.66335	-61.2031	-3.53146	-58.1	-3.67851	-55.0156	-4.08697	-59.1812	-3.0468
		-54.6719	-21.9475	-58.2938	-3.96156	-51.3062	-2.74954	-54.3844	-1.79605		-59.5125	-5.05962	-61.2031	-4.88911	-58.1	-5.05123	-55.0156	-5.48725	-59.1812	-4.24519
		-27.4906	-23.7754	-41.55	-5.71222	-54.85	-0.529575	-56.5844	-0.521278		-47.4437	-6.39372	-49.2	-6.18858	-45.9094	-6.35891	-43.0656	-6.82182	-50.7344	-5.39618
		-27.4906	-24.9748	-41.55	-7.36265	-54.85	1.91946	-56.5844	0.890255		-47.4437	-7.60231	-49.2	-7.36742	-45.9094	-7.5388	-43.0656	-8.02698	-50.7344	-6.44474
		-33.2844	-25.4281	-45.1281	-8.83646	-62.9562	4.52766	-61.3	2.39811		-47.875	-8.62379	-49.4156	-8.36525	-46.0187	-8.53014	-43.2156	-9.04055	-47.8687	-7.33662
		-33.2844	-25.0462	-45.1281	-10.0626	-62.9562	7.21207	-61.3	3.9546		-47.875	-9.40247	-49.4156	-9.12752	-46.0187	-9.27706	-43.2156	-9.80701	-47.8687	-8.02107
		-57.4625	-23.7769	-52.8375	-10.9789	-65.1906	9.87968	-62.3344	5.50585		-56.6406	-9.89227	-58.1094	-9.60808	-54.725	-9.73377	-52.0906	-10.2799	-55.0625	-8.45613
		-57.4625	-21.6125	-52.8375	-11.5365	-65.1906	12.433	-62.3344	6.99511		-56.6406	-10.0596	-58.1094	-9.77421	-54.725	-9.86681	-52.0906	-10.4263	-55.0625	-8.61101
		-67.1156	-18.5908	-55.4906	-11.7043	-63.5281	14.7738	-61.3812	8.36582		-59.9906	-9.88703	-61.5187	-9.60827	-58.425	-9.659	-55.5125	-10.2285	-59.2375	-8.46777
		-67.1156	-14.7964	-55.4906	-11.4709	-63.5281	16.8085	-61.3812	9.56364		-59.9906	-9.37414	-61.5187	-9.10883	-58.425	-9.10988	-55.5125	-9.68599	-59.2375	-8.02307
		-71.1531	-10.3581	-57.9656	-10.8451	-60.8344	18.4539	-60.0812	10.5399		-61.6437	-8.53748	-63.1437	-8.29287	-60.3281	-8.23698	-57.2969	-8.81672	-61.3563	-7.28998
		-71.1531	-5.44319	-57.9656	-9.85613	-60.8344	19.641	-60.0812	11.2541		-61.6437	-7.41119	-63.1437	-7.19299	-60.3281	-7.0755	-57.2969	-7.65524	-61.3563	-6.29663
		-102.4	-0.248241	-78.3375	-8.55255	-53.2969	20.3193	-55.4469	11.6768		-76.3781	-6.04486	-78	-5.85814	-74.9938	-5.67493	-72.25	-6.252	-72.7656	-5.08518
		-102.4	5.01184	-78.3375	-6.99987	-53.2969	20.4597	-55.4469	11.7906		-76.3781	-4.5001	-78	-4.34942	-74.9938	-4.09861	-72.25	-4.66995	-72.7656	-3.71008
		-100.35	10.1155	-74.0312	-5.27449	-42.575	20.0566	-49.45	11.5906		-74.0344	-2.84758	-75.7281	-2.73561	-72.7406	-2.41833	-69.9594	-2.98109	-72.3688	-2.2336
		-100.35	14.8483	-74.0312	-3.46022	-42.575	19.1278	-49.45	11.0865		-74.0344	-1.16224	-75.7281	-1.09072	-72.7406	-0.710106	-69.9594	-1.26181	-72.3688	-0.723171
		-62.4781	19.0144	-64.0125	-1.64404	-38.5156	17.7131	-47.4656	10.3004		-64.2719	0.480843	-66.075	0.511169	-62.8156	0.949955	-60.2156	0.41132	-64.8438	0.753307
		-62.4781	22.4491	-64.0125	0.0910759	-38.5156	15.8728	-47.4656	9.2659		-64.2719	2.01044	-66.075	2.00043	-62.8156	2.48957	-60.2156	1.96648	-64.8438	2.13099
		-44.4469	25.0273	-59.4813	1.66969	-39.5438	13.6837	-47.7844	8.02612		-59.8375	3.36437	-61.1875	3.31573	-58.15	3.84569	-55.6406	3.34044	-59.7687	3.35217
		-44.4469	26.6696	-59.4813	3.02811	-39.5438	11.2345	-47.7844	6.63166		-59.8375	4.492	-61.1875	4.40741	-58.15	4.96712	-55.6406	4.4817	-59.7687	4.36897
		-42.6219	27.3465	-57.6219	4.11901	-41.3062	8.62198	-48.7031	5.13744		-58.6531	5.35698	-59.9562	5.23987	-56.8312	5.81703	-54.1344	5.35383	-57.8062	5.1466
		-42.6219	27.077	-57.6219	4.9118	-41.3062	5.94435	-48.7031	3.59945		-58.6531	5.93891	-59.9562	5.79329	-56.8312	6.37493	-54.1344	5.93624	-57.8062	5.66435
		-27.6469	25.9266	-47.4937	5.39398	-45.5844	3.29704	-51.0969	2.07243		-51.5031	6.23226	-53.0062	6.06365	-49.5781	6.63586	-46.8937	6.22463	-52.2594	5.91555
		-27.6469	24.0005	-47.4937	5.57098	-45.5844	0.768661	-51.0969	0.607681		-51.5031	6.24781	-53.0062	6.06165	-49.5781	6.61163	-46.8937	6.22997	-52.2594	5.90858
		-37.575	21.435	-51.9437	5.46484	-49.6531	-1.5645	-53.3281	-0.750446		-54.225	6.00958	-55.9344	5.81131	-52.45	6.32734	-49.5344	5.97754	-53.85	5.66359
		-37.575	18.3883	-51.9437	5.11036	-49.6531	-3.63951	-53.3281	-1.96571		-54.225	5.5522	-55.9344	5.34754	-52.45	5.81846	-49.5344	5.50365	-53.85	5.21193
		-52.8469	15.0298	-57.1125	4.55256	-51.3563	-5.41	-54.3125	-3.01056		-58.6812	4.91877	-60.4031	4.71373	-56.9188	5.12981	-54.2375	4.85287	-57.4031	4.5929
		-52.8469	11.529	-57.1125	3.84283	-51.3563	-6.84729	-54.3125	-3.86705		-58.6812	4.15716	-60.4031	3.95746	-56.9188	4.31137	-54.2375	4.07467	-57.4031	3.85065
		-57.4719	8.04644	-58.8438	3.03507	-51.5094	-7.93867	-54.4406	-4.52709		-60.125	3.31707	-61.8156	3.12691	-58.3719	3.41339	-55.8312	3.21941	-59.1437	3.03116
		-57.4719	4.72555	-58.8438	2.18325	-51.5094	-8.68769	-54.4406	-4.99125		-60.125	2.44579	-61.8156	2.26965	-58.3719	2.48575	-55.8312	2.33622	-59.1437	2.17972
		-56.8094	1.68514	-58.9937	1.33657	-51.5562	-9.11217	-54.4906	-5.26829		-60.1906	1.58758	-61.9156	1.42889	-58.2938	1.57366	-55.925	1.4698	-59.5469	1.33772
		-56.8094	-0.983429	-58.9937	0.537395	-51.5562	-9.24072	-54.4906	-5.37348		-60.1906	0.779724	-61.9156	0.640869	-58.2938	0.71497	-55.925	0.65794	-59.5469	0.541401
		-55.8312	-3.21846	-58.9188	-0.180054	-51.5844	-9.11026	-54.5938	-5.32694		-60.1031	0.051403	-61.7719	-0.0653267	-58.2812	-0.0584602	-55.825	-0.069046	-59.5469	-0.179863
		-55.8312	-4.9881	-58.9188	-0.790882	-51.5844	-8.76408	-54.5938	-5.15251		-60.1031	-0.575256	-61.7719	-0.668907	-58.2812	-0.725079	-55.825	-0.69046	-59.5469	-0.804996
		-55.6812	-6.28805	-58.9	-1.27993	-51.6312	-8.24776	-54.65	-4.87509		-59.8781	-1.08747	-61.6125	-1.15776	-58.4094	-1.2723	-55.6937	-1.1939	-59.5156	-1.32036
		-55.6812	-7.13787	-58.9	-1.6408	-51.6312	-7.6066	-54.65	-4.5208		-59.8781	-1.4801	-61.6125	-1.52826	-58.4094	-1.69411	-55.6937	-1.5749	-59.5156	-1.72052
		-55.6625	-7.57666	-58.7281	-1.87578	-51.4625	-6.88429	-54.5031	-4.11377		-59.9813	-1.75581	-61.7031	-1.78242	-58.4219	-1.99242	-55.8094	-1.83754	-59.5562	-2.00624
		-55.6625	-7.65724	-58.7281	-1.99404	-51.4625	-6.1204	-54.5031	-3.67651		-59.9813	-1.92242	-61.7031	-1.92833	-58.4219	-2.17619	-55.8094	-1.99051	-59.5562	-2.18468
		-55.4312	-7.44143	-58.7656	-2.00891	-51.2906	-5.34916	-54.5094	-3.22914		-60.0938	-1.99213	-61.7094	-1.97973	-58.5219	-2.25801	-55.8719	-2.04754	-59.5	-2.26765
		-55.4312	-6.99482	-58.7656	-1.93806	-51.2906	-4.59871	-54.5094	-2.78759		-60.0938	-1.98078	-61.7094	-1.95112	-58.5219	-2.25344	-55.8719	-2.02551	-59.5	-2.26898
		-55.2344	-6.38266	-58.6	-1.80054	-51.475	-3.89118	-54.5469	-2.36549		-60.1156	-1.90477	-61.6531	-1.85938	-58.3719	-2.17991	-55.7562	-1.94178	-59.6281	-2.2049
		-55.2344	-5.6654	-58.6	-1.61533	-51.475	-3.24211	-54.5469	-1.97277		-60.1156	-1.78156	-61.6531	-1.72167	-58.3719	-2.05488	-55.7562	-1.81437	-59.6281	-2.09131
		-55.1656	-4.89693	-58.5844	-1.40114	-51.4	-2.66151	-54.5031	-1.61562		-60.0875	-1.62678	-61.6156	-1.55363	-58.2656	-1.89466	-55.65	-1.65977	-59.6562	-1.94407
		-55.1656	-4.12264	-58.5844	-1.17378	-51.4	-2.15464	-54.5031	-1.29814		-60.0875	-1.45502	-61.6156	-1.36938	-58.2656	-1.71385	-55.65	-1.4925	-59.6562	-1.77765
		-55.15	-3.37772	-58.6531	-0.946999	-51.3781	-1.72195	-54.5656	-1.02186		-59.9781	-1.27935	-61.6	-1.18055	-58.4	-1.5254	-55.7219	-1.32494	-59.4688	-1.60322
		-55.15	-2.68869	-58.6531	-0.731564	-51.3781	-1.36089	-54.5656	-0.786495		-59.9781	-1.10807	-61.6	-0.99678	-58.4	-1.33924	-55.7219	-1.16634	-59.4688	-1.43042
		-55.3438	-2.07291	-58.4781	-0.535107	-51.3719	-1.0664	-54.5781	-0.590324		-59.925	-0.949287	-61.6437	-0.824833	-58.2	-1.16253	-55.4625	-1.02282	-59.4625	-1.26667
		-55.3438	-1.53952	-58.4781	-0.362778	-51.3719	-0.831604	-54.5781	-0.430679		-59.925	-0.807762	-61.6437	-0.669479	-58.2	-1.00012	-55.4625	-0.898457	-59.4625	-1.11628
		-55.3344	-1.09167	-58.3281	-0.216866	-51.3469	-0.649452	-54.5438	-0.304413		-59.9562	-0.685215	-61.675	-0.533199	-58.3594	-0.85516	-55.4406	-0.794888	-59.4781	-0.981617
		-55.3344	-0.727081	-58.3281	-0.0976562	-51.3469	-0.511742	-54.5438	-0.207806		-59.9562	-0.583076	-61.675	-0.416565	-58.3594	-0.728321	-55.4406	-0.711441	-59.4781	-0.863647
		-55.2375	-0.439739	-58.5094	-0.00400543	-51.4219	-0.410461	-54.5656	-0.137234		-60.0062	-0.500011	-61.7031	-0.318909	-58.4344	-0.619125	-55.5656	-0.646782	-59.4	-0.760937
		-55.2375	-0.22192	-58.5094	0.0662804	-51.4219	-0.338745	-54.5656	-0.0893593		-60.0062	-0.434685	-61.7031	-0.238895	-58.4344	-0.525951	-55.5656	-0.598145	-59.4	-0.672054
		-55.3469	-0.0642776	-58.55	0.116253	-51.5687	-0.289822	-54.6156	-0.0609398		-59.9156	-0.383854	-61.5562	-0.174141	-58.525	-0.446796	-55.6844	-0.562286	-59.4312	-0.594711
		-55.3469	0.04282	-58.55	0.149345	-51.5687	-0.258064	-54.6156	-0.0484467		-59.9156	-0.344849	-61.5562	-0.122452	-58.525	-0.379562	-55.6844	-0.53587	-59.4312	-0.526619
		-55.1969	0.108433	-58.5125	0.169373	-51.5281	-0.238514	-54.5094	-0.0492096		-59.9875	-0.315189	-61.5969	-0.0813484	-58.4625	-0.321579	-55.8563	-0.515938	-59.7562	-0.464916
		-55.1969	0.141048	-58.5125	0.179005	-51.5281	-0.22707	-54.5094	-0.0609398		-59.9875	-0.291729	-61.5969	-0.0484467	-58.4625	-0.270653	-55.8563	-0.49963	-59.7562	-0.4076
		-55.0938	0.148296	-58.6187	0.180912	-51.4781	-0.220394	-54.3719	-0.0808716		-59.9875	-0.272274	-61.6125	-0.021553	-58.4312	-0.224495	-55.9031	-0.484562	-59.8563	-0.353146
		-55.0938	0.135994	-58.6187	0.17767	-51.4781	-0.216007	-54.3719	-0.106716		-59.9875	-0.254726	-61.6125	0.00114441	-58.4312	-0.182056	-55.9031	-0.469589	-59.8563	-0.299549
		-55.0969	0.109291	-58.4406	0.171089	-51.3031	-0.211906	-54.4	-0.136566		-60.1656	-0.237179	-61.7625	0.0203133	-58.5781	-0.142097	-55.9531	-0.453281	-59.8312	-0.246906
		-55.0969	0.0725746	-58.4406	0.163174	-51.3031	-0.206661	-54.4	-0.168037		-60.1656	-0.218678	-61.7625	0.0370026	-58.5781	-0.103569	-55.9531	-0.435066	-59.8312	-0.194836
		-55.1469	0.0285149	-58.4719	0.154305	-51.3187	-0.199413	-54.4219	-0.199509		-60.2812	-0.198746	-61.675	0.0518799	-58.4375	-0.0665665	-55.7656	-0.415134	-59.7469	-0.143242
		-55.1469	-0.0199318	-58.4719	0.145435	-51.3187	-0.18959	-54.4219	-0.229168		-60.2812	-0.177193	-61.675	0.0652313	-58.4375	-0.0307083	-55.7656	-0.393581	-59.7469	-0.0933647
		-55.15	-0.0707626	-58.4625	0.137615	-51.4188	-0.177288	-54.4125	-0.254917		-60.1	-0.153732	-61.75	0.0769615	-58.4281	0.00400543	-55.8719	-0.371075	-59.7719	-0.0457764
		-55.15	-0.122643	-58.4625	0.130844	-51.4188	-0.162411	-54.4125	-0.275803		-60.1	-0.12846	-61.75	0.0869751	-58.4281	0.0368118	-55.8719	-0.348377	-59.7719	-0.00143051
		-55.2594	-0.17395	-58.5438	0.124931	-51.5219	-0.145817	-54.6094	-0.290298		-60.1344	-0.101757	-61.6125	0.0951767	-58.4688	0.0673294	-55.9281	-0.325775	-59.65	0.0388145
		-55.2594	-0.224018	-58.5438	0.120068	-51.5219	-0.128269	-54.6094	-0.297451		-60.1344	-0.0739098	-61.6125	0.10128	-58.4688	0.0950813	-55.9281	-0.303936	-59.65	0.0738144
		-55.1375	-0.272083	-58.3812	0.11673	-51.7687	-0.110912	-54.6156	-0.296879		-60.1156	-0.0457764	-61.6156	0.104618	-58.55	0.119495	-55.8812	-0.283813	-59.55	0.102139
		-55.1375	-0.317383	-58.3812	0.114441	-51.7687	-0.0948906	-54.6156	-0.287914		-60.1156	-0.0173569	-61.6156	0.105476	-58.55	0.14019	-55.8812	-0.265694	-59.55	0.123596
		-55.1125	-0.359154	-58.4844	0.113583	-51.6625	-0.0813484	-54.5969	-0.270939		-60.0687	0.0112534	-61.6125	0.10376	-58.4719	0.156689	-55.7188	-0.249958	-59.6375	0.138092
		-55.1125	-0.397015	-58.4844	0.113964	-51.6625	-0.0718117	-54.5969	-0.246239		-60.0687	0.0390053	-61.6125	0.099659	-58.4719	0.168514	-55.7188	-0.236893	-59.6375	0.145054
		-55.1844	-0.430679	-58.4437	0.115299	-51.6156	-0.0670433	-54.6281	-0.214481		-60.0187	0.0656128	-61.6875	0.093174	-58.5156	0.175476	-55.7031	-0.226307	-59.6437	0.144291
		-55.1844	-0.459862	-58.4437	0.117779	-51.6156	-0.0681877	-54.6281	-0.176907		-60.0187	0.0912666	-61.6875	0.0845909	-58.5156	0.177574	-55.7031	-0.218105	-59.6437	0.136566
		-55.2906	-0.484562	-58.5187	0.121307	-51.5	-0.0763893	-54.7313	-0.134659		-59.9719	0.115299	-61.5562	0.0747681	-58.4312	0.174809	-55.9594	-0.212383	-59.525	0.121975
		-55.2906	-0.504684	-58.5187	0.12598	-51.5	-0.0918388	-54.7313	-0.0892639		-59.9719	0.137615	-61.5562	0.0637054	-58.4312	0.166988	-55.9594	-0.20895	-59.525	0.101185
		-55.3187	-0.520515	-58.4219	0.131226	-51.3875	-0.114632	-54.6375	-0.0426292		-60.0875	0.15831	-61.5	0.0522614	-58.2	0.154591	-55.9312	-0.207233	-59.6406	0.0748634
		-55.3187	-0.53196	-58.4219	0.136852	-51.3875	-0.144863	-54.6375	0.00371933		-60.0875	0.176525	-61.5	0.0407219	-58.2	0.138187	-55.9312	-0.207233	-59.6406	0.0437737
		-55.4094	-0.539207	-58.5375	0.143337	-51.3219	-0.181198	-54.8375	0.0478745		-60.2594	0.191879	-61.625	0.02985	-58.3	0.117874	-55.9219	-0.209045	-59.6719	0.00953674
		-55.4094	-0.542927	-58.5375	0.150204	-51.3219	-0.222969	-54.8375	0.0883102		-60.2594	0.204468	-61.625	0.0200272	-58.3	0.0940323	-55.9219	-0.212097	-59.6719	-0.0271797
		-55.4312	-0.543308	-58.4688	0.156784	-51.3594	-0.269032	-54.6562	0.123787		-60.1719	0.213623	-61.4906	0.0115395	-58.375	0.0674248	-55.9906	-0.216198	-59.55	-0.0658035
		-55.4312	-0.540447	-58.4688	0.163269	-51.3594	-0.317001	-54.6562	0.152874		-60.1719	0.218868	-61.4906	0.00486374	-58.375	0.0385284	-55.9906	-0.221443	-59.55	-0.104904
		-55.35	-0.534534	-58.475	0.169563	-51.4125	-0.365543	-54.6844	0.17519		-60.0562	0.22049	-61.5906	0	-58.4281	0.00753403	-55.8969	-0.227547	-59.45	-0.143433
		-55.35	-0.526047	-58.475	0.174999	-51.4125	-0.412655	-54.6844	0.189972		-60.0562	0.217724	-61.5906	-0.00305176	-58.4281	-0.0247955	-55.8969	-0.234032	-59.45	-0.180912
		-55.3125	-0.515175	-58.45	0.179386	-51.5656	-0.455856	-54.4906	0.196838		-60	0.210381	-61.75	-0.00429153	-58.5219	-0.057888	-55.8687	-0.240993	-59.5375	-0.216007
		-55.3125	-0.501823	-58.45	0.182724	-51.5656	-0.493526	-54.4906	0.196266		-60	0.198841	-61.75	-0.0038147	-58.5219	-0.0911713	-55.8687	-0.248432	-59.5375	-0.248051
		-55.2687	-0.486374	-58.25	0.184822	-51.5375	-0.523949	-54.4	0.188732		-59.9562	0.183105	-61.7812	-0.00200272	-58.3625	-0.124073	-55.8563	-0.255871	-59.7062	-0.276375
		-55.2687	-0.469112	-58.25	0.185299	-51.5375	-0.545597	-54.4	0.174999		-59.9562	0.163651	-61.7812	0.000762939	-58.3625	-0.156498	-55.8563	-0.263023	-59.7062	-0.299931
		-55.5094	-0.449657	-58.4094	0.183868	-51.3781	-0.557518	-54.4094	0.155926		-60	0.140667	-61.7437	0.00476837	-58.3687	-0.187492	-55.7875	-0.26989	-59.7156	-0.318718
		-55.5094	-0.428391	-58.4094	0.180435	-51.3781	-0.558949	-54.4094	0.132847		-60	0.114727	-61.7437	0.00953674	-58.3687	-0.216866	-55.7875	-0.27647	-59.7156	-0.331783
		-55.4875	-0.405788	-58.4531	0.17519	-51.575	-0.549698	-54.4375	0.107193		-59.925	0.0869751	-61.5906	0.0146866	-58.3062	-0.244331	-55.9562	-0.282288	-59.7156	-0.338936
		-55.4875	-0.381374	-58.4531	0.167847	-51.575	-0.529766	-54.4375	0.0800133		-59.925	0.0581741	-61.5906	0.0208855	-58.3062	-0.268841	-55.9562	-0.287724	-59.7156	-0.340271
		-55.3844	-0.355339	-58.5281	0.158501	-51.9219	-0.49963	-54.625	0.0526428		-59.85	0.0291824	-61.375	0.0274658	-58.3469	-0.290585	-56.1	-0.292397	-59.5844	-0.335121
		-55.3844	-0.328255	-58.5281	0.147629	-51.9219	-0.460434	-54.625	0.0265121		-59.85	0.00152588	-61.375	0.0350952	-58.3469	-0.309086	-56.1	-0.296307	-59.5844	-0.323868
		-55.675	-0.300026	-58.4781	0.135136	-51.8531	-0.413322	-54.55	0.00247955		-60.0281	-0.0242233	-61.4312	0.0441551	-58.4375	-0.324345	-56.0219	-0.29974	-59.7156	-0.306416
		-55.675	-0.270939	-58.4781	0.12188	-51.8531	-0.359535	-54.55	-0.0189781		-60.0281	-0.0473022	-61.4312	0.055027	-58.4375	-0.335884	-56.0219	-0.302601	-59.7156	-0.283432
		-55.6312	-0.241089	-58.3312	0.108528	-51.8812	-0.300694	-54.5281	-0.0371933		-60	-0.0660896	-61.7469	0.0687599	-58.4937	-0.343513	-55.8438	-0.305271	-59.7906	-0.25568
		-55.6312	-0.210667	-58.3312	0.094986	-51.8812	-0.238323	-54.5281	-0.0512123		-60	-0.080204	-61.7469	0.08564	-58.4937	-0.34771	-55.8438	-0.307655	-59.7906	-0.223255
		-55.3781	-0.179863	-58.25	0.0823975	-51.8125	-0.173759	-54.5969	-0.0612259		-60.0781	-0.0888824	-61.7313	0.107002	-58.5594	-0.348091	-56.125	-0.31004	-59.725	-0.187111
		-55.3781	-0.149155	-58.25	0.071907	-51.8125	-0.108337	-54.5969	-0.0673294		-60.0781	-0.0911713	-61.7313	0.133991	-58.5594	-0.344658	-56.125	-0.312424	-59.725	-0.148582
		-55.4656	-0.118351	-58.275	0.0638962	-51.7938	-0.0433922	-54.625	-0.0693321		-60.0719	-0.0864983	-61.6344	0.167561	-58.5562	-0.337982	-56.1	-0.314617	-59.8	-0.108719
		-55.4656	-0.0875473	-58.275	0.0597954	-51.7938	0.0201225	-54.625	-0.0677109		-60.0719	-0.0741005	-61.6344	0.209141	-58.5562	-0.328732	-56.1	-0.31662	-59.8	-0.067997
		-55.3812	-0.0573158	-58.25	0.0599861	-51.4531	0.0819206	-54.5719	-0.062561		-59.975	-0.0538826	-61.65	0.260258	-58.4281	-0.316715	-55.9188	-0.317955	-59.85	-0.0281334
		-55.3812	-0.0276566	-58.25	0.0653267	-51.4531	0.141239	-54.5719	-0.0541687		-59.975	-0.0252724	-61.65	0.321674	-58.4281	-0.302124	-55.9188	-0.318336	-59.85	0.00972748
		-55.55	0.00171661	-58.4656	0.0762939	-51.5156	0.197887	-54.6	-0.0429153		-60.125	0.0125885	-61.6156	0.394821	-58.5656	-0.28553	-55.9688	-0.317097	-59.8375	0.0447273
		-55.55	0.0306129	-58.4656	0.0933647	-51.5156	0.252151	-54.6	-0.0288963		-60.125	0.0603676	-61.6156	0.48151	-58.5656	-0.26722	-55.9688	-0.313282	-59.8375	0.0761032
		-55.6344	0.0580788	-58.5125	0.117016	-51.7375	0.304222	-54.6281	-0.0123024		-60.15	0.118446	-61.5438	0.582695	-58.6187	-0.247574	-56.0687	-0.306129	-59.8156	0.102997
		-55.6344	0.0846863	-58.5125	0.146866	-51.7375	0.354481	-54.6281	0.00705719		-60.15	0.187778	-61.5438	0.699329	-58.6187	-0.226498	-56.0687	-0.294876	-59.8156	0.124645
		-55.575	0.110531	-58.4344	0.182915	-51.6812	0.403214	-54.5219	0.0291824		-59.9688	0.269604	-61.6	0.832176	-58.525	-0.2038	-55.95	-0.278282	-59.75	0.141048
		-55.575	0.134945	-58.4344	0.224495	-51.6812	0.451183	-54.5219	0.0541687		-59.9688	0.364876	-61.6	0.981331	-58.525	-0.179577	-55.95	-0.255108	-59.75	0.15173
		-55.4156	0.157833	-58.4031	0.27113	-51.9281	0.498867	-54.4281	0.0825882		-60.0656	0.475025	-61.5219	1.14727	-58.5438	-0.153542	-56.0406	-0.224495	-59.6656	0.157452
		-55.4156	0.179386	-58.4031	0.32196	-51.9281	0.546837	-54.4281	0.11425		-60.0656	0.601196	-61.5219	1.3299	-58.5438	-0.124741	-56.0406	-0.185299	-59.6656	0.158501
		-55.4562	0.199604	-58.35	0.375557	-51.6594	0.595856	-54.7031	0.149918		-60.1375	0.744629	-61.6844	1.52788	-58.5812	-0.0928879	-56.2	-0.136948	-59.5719	0.155449
		-55.4562	0.218582	-58.35	0.431252	-51.6594	0.646305	-54.7031	0.190163		-60.1375	0.906754	-61.6844	1.74036	-58.5812	-0.056839	-56.2	-0.0788689	-59.5719	0.149536
		-55.5125	0.23613	-58.6063	0.488281	-51.5906	0.698471	-54.5	0.23489		-60.0969	1.08862	-61.5844	1.96552	-58.525	-0.0151634	-56.125	-0.0106812	-59.5625	0.141144
		-55.5125	0.252533	-58.6063	0.54512	-51.5906	0.753021	-54.5	0.284672		-60.0969	1.29118	-61.5844	2.20098	-58.525	0.0324249	-56.125	0.0676155	-59.5625	0.131416
		-55.525	0.268459	-58.4188	0.600624	-51.4281	0.810242	-54.5844	0.33989		-59.9188	1.5152	-61.5406	2.44446	-58.5187	0.0875473	-56.1781	0.15583	-59.5906	0.121689
		-55.525	0.2841	-58.4188	0.654602	-51.4281	0.870037	-54.5844	0.400162		-59.9188	1.76077	-61.5406	2.69279	-58.5187	0.151348	-56.1781	0.253391	-59.5906	0.112724
		-55.4906	0.300026	-58.2812	0.706196	-51.5594	0.932884	-54.75	0.465679		-59.9156	2.02742	-61.6688	2.94256	-58.6469	0.224972	-56.15	0.359249	-59.6906	0.105476
		-55.4906	0.316906	-58.2812	0.754833	-51.5594	0.998783	-54.75	0.536823		-59.9156	2.31476	-61.6688	3.19014	-58.6469	0.309086	-56.15	0.47226	-59.6906	0.100899
		-55.275	0.335312	-58.1844	0.800228	-51.4688	1.06783	-54.5187	0.612831		-60.0812	2.62098	-61.5344	3.43208	-58.4875	0.404835	-56.1781	0.590897	-59.7969	0.0989914
		-55.275	0.355911	-58.1844	0.841904	-51.4688	1.14002	-54.5187	0.693321		-60.0812	2.9439	-61.5344	3.66497	-58.4875	0.513077	-56.1781	0.713062	-59.7969	0.100136
		-55.3062	0.379181	-58.2156	0.8811	-51.5625	1.21508	-54.525	0.778103		-60.0969	3.28131	-61.0562	3.88517	-58.6312	0.63343	-56.2656	0.837135	-59.7469	0.104904
		-55.3062	0.405979	-58.2156	0.91753	-51.5625	1.29309	-54.525	0.866604		-60.0969	3.63007	-61.0562	4.08955	-58.6312	0.766277	-56.2656	0.960827	-59.7469	0.113106
		-55.45	0.436592	-58.1344	0.95129	-51.5	1.37405	-54.5344	0.957966		-59.8687	3.98607	-60.8344	4.27589	-58.6125	0.91095	-56.1281	1.08204	-59.6937	0.124359
		-55.45	0.471401	-58.1344	0.983238	-51.5	1.4575	-54.5344	1.05171		-59.8687	4.34504	-60.8344	4.44145	-58.6125	1.06659	-56.1281	1.19867	-59.6937	0.138187
		-55.4875	0.510693	-58.0938	1.01366	-51.4031	1.54324	-54.5219	1.14698		-59.825	4.70276	-60.575	4.58422	-58.6156	1.23224	-56.0938	1.30844	-59.8281	0.1544
		-55.4875	0.554371	-58.0938	1.04332	-51.4031	1.63107	-54.5219	1.24283		-59.825	5.05419	-60.575	4.70362	-58.6156	1.406	-56.0938	1.40953	-59.8281	0.172234
		-55.3875	0.602627	-58.1688	1.07288	-51.4188	1.72081	-54.4031	1.33886		-59.4906	5.39484	-60.2812	4.79851	-58.6187	1.58567	-56.0094	1.50023	-59.6219	0.191402
		-55.3875	0.654697	-58.1688	1.10235	-51.4188	1.81227	-54.4031	1.43394		-59.4906	5.72023	-60.2812	4.86889	-58.6187	1.76935	-56.0094	1.57909	-59.6219	0.211239
		-55.4375	0.709724	-58.1688	1.13239	-51.3125	1.90496	-54.3344	1.52712		-59.1437	6.02503	-59.9813	4.91543	-58.5906	1.95436	-55.9062	1.64509	-59.7188	0.231075
		-55.4375	0.767612	-58.1688	1.1631	-51.3125	1.99852	-54.3344	1.61819		-59.1437	6.30541	-59.9813	4.93851	-58.5906	2.13776	-55.9062	1.69764	-59.7188	0.250912
		-55.4281	0.827312	-58.0187	1.19457	-50.9594	2.09255	-54.3812	1.70603		-58.85	6.55804	-59.8781	4.93946	-58.4469	2.31695	-55.6531	1.73588	-59.5438	0.270462
		-55.4281	0.887585	-58.0187	1.227	-50.9594	2.18687	-54.3812	1.78995		-58.85	6.77977	-59.8781	4.9202	-58.4469	2.48938	-55.6531	1.76029	-59.5438	0.28944
		-55.325	0.947857	-57.9406	1.26009	-50.9625	2.28052	-54.2562	1.86939		-58.375	6.9685	-59.7687	4.88243	-58.3094	2.65217	-55.5125	1.77107	-59.6094	0.307751
		-55.325	1.00679	-57.9406	1.29395	-50.9625	2.37331	-54.2562	1.94368		-58.375	7.12214	-59.7687	4.82779	-58.3094	2.80304	-55.5125	1.76849	-59.6094	0.325203
		-55.2313	1.06363	-57.95	1.3278	-51.1156	2.46496	-54.0781	2.01244		-57.9219	7.23982	-59.5344	4.75855	-58.2406	2.94037	-55.4625	1.75371	-59.6281	0.342083
		-55.2313	1.1178	-57.95	1.36204	-51.1156	2.55432	-54.0781	2.07462		-57.9219	7.32183	-59.5344	4.6771	-58.2406	3.06215	-55.4625	1.72806	-59.6281	0.358868
		-55.2531	1.16806	-57.9062	1.39675	-50.85	2.64072	-53.975	2.13013		-57.575	7.36866	-59.0687	4.58527	-57.8969	3.16715	-55.3937	1.69249	-59.6812	0.37508
		-55.2531	1.21422	-57.9062	1.4308	-50.85	2.72388	-53.975	2.17867		-57.575	7.38153	-59.0687	4.48475	-57.8969	3.25451	-55.3937	1.64833	-59.6812	0.391197
		-55.3	1.25637	-57.8875	1.46427	-50.8125	2.80275	-53.8031	2.21939		-57.2344	7.36256	-58.9688	4.37794	-57.65	3.32403	-55.4594	1.5975	-59.525	0.407505
		-55.3	1.29395	-57.8875	1.49775	-50.8125	2.87638	-53.8031	2.25201		-57.2344	7.31392	-58.9688	4.26655	-57.65	3.37629	-55.4594	1.54104	-59.525	0.423622
		-55.0156	1.32723	-57.75	1.53065	-50.7469	2.94485	-53.9219	2.27661		-57	7.23877	-58.8937	4.15192	-57.5062	3.41139	-55.3438	1.48067	-59.6719	0.440502
		-55.0156	1.3567	-57.75	1.56279	-50.7469	3.00713	-53.9219	2.29311		-57	7.14045	-58.8937	4.03576	-57.5062	3.43046	-55.3438	1.41792	-59.6719	0.458145
		-54.8594	1.38264	-57.6406	1.59473	-50.575	3.06273	-53.7844	2.30131		-56.675	7.02209	-58.9094	3.91912	-57.3281	3.43494	-55.3344	1.35403	-59.65	0.475883
		-54.8594	1.40562	-57.6406	1.6263	-50.575	3.11174	-53.7844	2.30122		-56.675	6.88744	-58.9094	3.80363	-57.3281	3.42607	-55.3344	1.29061	-59.65	0.494576
		-54.8937	1.42651	-57.5062	1.65758	-50.3375	3.15399	-53.6156	2.29349		-56.35	6.74019	-58.65	3.69053	-57.2437	3.40595	-55.25	1.22852	-59.5656	0.51403
		-54.8937	1.44596	-57.5062	1.68858	-50.3375	3.19004	-53.6156	2.27871		-56.35	6.5835	-58.65	3.58047	-57.2437	3.37563	-55.25	1.16911	-59.5656	0.534344
		-54.8906	1.46446	-57.5031	1.71947	-50.1063	3.22037	-53.4969	2.25716		-55.95	6.42052	-58.4188	3.47395	-57.1031	3.33672	-55.0187	1.11361	-59.5062	0.55542
		-54.8906	1.48296	-57.5031	1.75056	-50.1063	3.24583	-53.4969	2.22998		-55.95	6.25467	-58.4188	3.37248	-57.1031	3.29113	-55.0187	1.06277	-59.5062	0.576782
		-54.8844	1.50175	-57.5156	1.78137	-49.8687	3.26767	-53.2844	2.19812		-55.7844	6.08826	-58.2	3.27625	-56.9406	3.24011	-55.1719	1.01757	-59.2844	0.598907
		-54.8844	1.5213	-57.5156	1.81189	-49.8687	3.28712	-53.2844	2.16265		-55.7844	5.92356	-58.2	3.18537	-56.9406	3.18451	-55.1719	0.97847	-59.2844	0.621033
		-54.8281	1.542	-57.5438	1.84193	-50.0406	3.30582	-53.2531	2.12507		-55.5719	5.76248	-58.1531	3.10087	-56.8687	3.12481	-55.1312	0.946331	-59.4	0.643158
		-54.8281	1.56412	-57.5438	1.87159	-50.0406	3.32489	-53.2531	2.08654		-55.5719	5.60637	-58.1531	3.02277	-56.8687	3.06225	-55.1312	0.921726	-59.4	0.664997
		-54.8031	1.58777	-57.4312	1.90029	-49.7812	3.34625	-53.2156	2.04849		-55.6312	5.45607	-58.2406	2.95095	-56.8875	2.99711	-55.0438	0.904655	-59.6156	0.685883
		-54.8031	1.61238	-57.4312	1.92804	-49.7812	3.37172	-53.2156	2.01225		-55.6312	5.31225	-58.2406	2.88496	-56.8875	2.92931	-55.0438	0.895309	-59.6156	0.705624
		-54.725	1.63822	-57.225	1.95446	-49.5406	3.40242	-53.05	1.97878		-55.3656	5.17521	-58.1094	2.82469	-56.7437	2.8594	-55.1406	0.893688	-59.7062	0.723934
		-54.725	1.66512	-57.225	1.97926	-49.5406	3.43962	-53.05	1.94931		-55.3656	5.04446	-58.1094	2.77014	-56.7437	2.7874	-55.1406	0.899506	-59.7062	0.740242
		-54.6688	1.69268	-57.1625	2.00224	-49.4813	3.48434	-52.9875	1.9248		-55.1812	4.91962	-57.9188	2.71997	-56.4344	2.71282	-55.1187	0.91238	-59.3375	0.75388
		-54.6688	1.72052	-57.1625	2.02332	-49.4813	3.53699	-52.9875	1.90582		-55.1812	4.80013	-57.9188	2.67401	-56.4344	2.63596	-55.1187	0.93174	-59.3375	0.764751
		-54.5469	1.74828	-57.0844	2.04229	-49.4531	3.59793	-53.025	1.89266		-54.9312	4.68521	-57.8219	2.63166	-56.4375	2.55728	-55.0781	0.956917	-59.2656	0.772858
		-54.5469	1.77584	-57.0844	2.05908	-49.4531	3.66726	-53.025	1.88541		-54.9312	4.57382	-57.8219	2.59142	-56.4375	2.47669	-55.0781	0.986767	-59.2656	0.777531
		-54.2812	1.80283	-56.825	2.07367	-49.35	3.74422	-53.0656	1.88389		-54.5562	4.46539	-57.7906	2.55241	-56.3375	2.39458	-55.0531	1.02024	-59.3281	0.778866
		-54.2812	1.82896	-56.825	2.08616	-49.35	3.82853	-53.0656	1.88751		-54.5562	4.35896	-57.7906	2.51398	-56.3375	2.31199	-55.0531	1.05639	-59.3281	0.777149
		-54.3406	1.85413	-56.9594	2.09665	-49.35	3.91903	-53.0531	1.8959		-54.6187	4.25358	-57.5781	2.47517	-56	2.22931	-54.9719	1.09415	-59.2	0.772381
		-54.3406	1.87836	-56.9594	2.10505	-49.35	4.0143	-53.0531	1.9083		-54.6187	4.14915	-57.5781	2.43464	-56	2.1471	-54.9719	1.13211	-59.2	0.765514
		-54.3812	1.90144	-56.8344	2.1121	-49.2969	4.11377	-52.9406	1.92356		-54.4281	4.0452	-57.6219	2.3921	-56.0656	2.06671	-54.9937	1.16882	-59.1875	0.756359
		-54.3812	1.92337	-56.8344	2.11763	-49.2969	4.21581	-52.9406	1.94073		-54.4281	3.94154	-57.6219	2.34728	-56.0656	1.98898	-54.9937	1.20354	-59.1875	0.745106
		-54.225	1.94397	-56.8219	2.12202	-48.825	4.3191	-52.7437	1.95913		-54.2	3.83825	-57.4625	2.29912	-56.0344	1.91488	-54.8781	1.2352	-59.2562	0.73328
		-54.225	1.96342	-56.8219	2.12564	-48.825	4.42276	-52.7437	1.97802		-54.2	3.73554	-57.4625	2.24762	-56.0344	1.84536	-54.8781	1.26286	-59.2562	0.720978
		-54.2	1.98212	-56.6844	2.1287	-48.6094	4.52557	-52.5781	1.99652		-54.0938	3.63388	-57.2656	2.19307	-56.0062	1.78127	-54.75	1.28546	-59.1562	0.708866
		-54.2	2.00005	-56.6844	2.13165	-48.6094	4.62666	-52.5781	2.01406		-54.0938	3.53394	-57.2656	2.1349	-56.0062	1.72348	-54.75	1.30253	-59.1562	0.697613
		-54.1781	2.0175	-56.4875	2.1348	-48.275	4.72546	-52.5687	2.03066		-53.8281	3.43628	-57.1562	2.07376	-55.9	1.67236	-54.7188	1.31378	-59.0344	0.687504
		-54.1781	2.03476	-56.4875	2.13861	-48.275	4.82159	-52.5687	2.04601		-53.8281	3.34139	-57.1562	2.01044	-55.9	1.62802	-54.7188	1.31865	-59.0344	0.679684
		-54.0125	2.0524	-56.55	2.14367	-48.125	4.91428	-52.4531	2.06022		-53.6969	3.25012	-57.1156	1.94502	-56	1.59082	-54.7437	1.31731	-59.2094	0.674438
		-54.0125	2.07119	-56.55	2.15025	-48.125	5.00326	-52.4531	2.07357		-53.6969	3.16286	-57.1156	1.87855	-56	1.56107	-54.7437	1.30978	-59.2094	0.671577
		-53.8	2.09093	-56.2906	2.15883	-48.0125	5.08823	-52.3438	2.08654		-53.65	3.08027	-57.0781	1.81141	-55.8781	1.53809	-54.5375	1.29633	-59.2406	0.671387
		-53.8	2.11258	-56.2906	2.17018	-48.0125	5.16863	-52.3438	2.09961		-53.65	3.00283	-57.0781	1.74408	-55.8781	1.52159	-54.5375	1.27735	-59.2406	0.674248
		-53.6969	2.1368	-56.2469	2.18449	-47.8844	5.24416	-52.2344	2.11334		-53.7031	2.93055	-56.9625	1.67761	-55.9094	1.51129	-54.5687	1.2536	-59.1031	0.680161
		-53.6969	2.16379	-56.2469	2.20222	-47.8844	5.31397	-52.2344	2.12822		-53.7031	2.8636	-56.9625	1.61285	-55.9094	1.50652	-54.5687	1.22595	-59.1031	0.68903
		-53.65	2.19402	-56.2719	2.22406	-47.7219	5.37739	-52.2156	2.14472		-53.5969	2.80218	-56.9219	1.55029	-55.7094	1.50623	-54.4562	1.19514	-59.0781	0.700569
		-53.65	2.22769	-56.2719	2.24991	-47.7219	5.43365	-52.2156	2.16351		-53.5969	2.7463	-56.9219	1.48973	-55.7094	1.50976	-54.4562	1.16196	-59.0781	0.714588
		-53.7031	2.26498	-56.2781	2.28024	-47.575	5.48105	-52.2969	2.18449		-53.4875	2.69547	-56.8375	1.43213	-55.5687	1.51644	-54.3438	1.12734	-58.9625	0.730705
		-53.7031	2.30551	-56.2781	2.31533	-47.575	5.51863	-52.2969	2.20814		-53.4875	2.64959	-56.8375	1.37787	-55.5687	1.52531	-54.3438	1.09243	-58.9625	0.748539
		-53.6156	2.34919	-56.05	2.35491	-47.1937	5.54562	-52.1	2.23446		-53.25	2.60849	-56.9781	1.32704	-55.6437	1.5358	-54.4344	1.0581	-58.9531	0.767994
		-53.6156	2.39563	-56.05	2.39887	-47.1937	5.55973	-52.1	2.26307		-53.25	2.57196	-56.9781	1.27974	-55.6437	1.54705	-54.4344	1.0252	-58.9531	0.788593
		-53.5187	2.44398	-55.8406	2.44713	-46.8531	5.55954	-52.0531	2.29387		-53.1281	2.54002	-57	1.23587	-55.625	1.5583	-54.3875	0.994492	-58.9594	0.809383
		-53.5187	2.4931	-55.8406	2.49891	-46.8531	5.54399	-52.0531	2.3263		-53.1281	2.51226	-57	1.19572	-55.625	1.56898	-54.3875	0.966835	-58.9594	0.830364
		-53.5125	2.54221	-55.8563	2.55375	-46.6125	5.51167	-51.9062	2.35968		-53.0969	2.4888	-56.7344	1.15976	-55.4875	1.57871	-54.3187	0.942802	-59.1344	0.85144
		-53.5125	2.59018	-55.8563	2.61116	-46.6125	5.4616	-51.9062	2.39353		-53.0969	2.46983	-56.7344	1.12762	-55.4875	1.58672	-54.3187	0.922585	-59.1344	0.871468
		-53.4	2.63567	-55.9813	2.67029	-46.3719	5.39274	-51.7531	2.4272		-53.0687	2.45523	-56.5438	1.0994	-55.4437	1.59273	-54.3	0.906658	-59.0281	0.89035
		-53.4	2.67763	-55.9813	2.73027	-46.3719	5.30491	-51.7531	2.45981		-53.0687	2.44541	-56.5438	1.07555	-55.4437	1.59655	-54.3	0.894833	-59.0281	0.907707
		-53.2188	2.71502	-55.75	2.78988	-46.1937	5.19772	-51.6469	2.4909		-52.85	2.44074	-56.6437	1.05629	-55.4188	1.59769	-54.2219	0.887203	-58.8125	0.922775
		-53.2188	2.74687	-55.75	2.84843	-46.1937	5.07107	-51.6469	2.5197		-52.85	2.4415	-56.6437	1.04198	-55.4188	1.59626	-54.2219	0.883579	-58.8125	0.936031
		-52.95	2.77252	-55.6562	2.90499	-45.925	4.92554	-51.6344	2.54593		-52.825	2.44761	-56.675	1.03302	-55.2281	1.59245	-54.3062	0.883579	-58.7344	0.947094
		-52.95	2.7914	-55.6562	2.95877	-45.925	4.76198	-51.6344	2.56901		-52.825	2.45934	-56.675	1.02968	-55.2281	1.58625	-54.3062	0.886822	-58.7344	0.955391
		-52.7938	2.80361	-55.3656	3.00913	-45.6	4.58117	-51.6	2.58846		-52.6406	2.47679	-56.65	1.03245	-55.2406	1.57785	-54.3438	0.892639	-58.7687	0.960732
		-52.7938	2.80914	-55.3656	3.05538	-45.6	4.38433	-51.6	2.60468		-52.6406	2.49968	-56.65	1.0416	-55.2406	1.56746	-54.3438	0.900269	-58.7687	0.963497
		-52.8219	2.80828	-55.175	3.09725	-45.3469	4.17318	-51.45	2.61736		-52.6375	2.528	-56.6375	1.05724	-55.1781	1.55592	-54.3	0.909424	-58.7437	0.963879
		-52.8219	2.8019	-55.175	3.13425	-45.3469	3.94888	-51.45	2.6268		-52.6375	2.56109	-56.6375	1.07985	-55.1781	1.5439	-54.3	0.919628	-58.7437	0.961685
		-52.5594	2.79064	-55.1656	3.16629	-45.2687	3.71361	-51.175	2.63319		-52.7188	2.59857	-56.6031	1.1095	-55.0781	1.53179	-54.0812	0.929832	-58.7531	0.957108
		-52.5594	2.77586	-55.1656	3.19347	-45.2687	3.46899	-51.175	2.637		-52.7188	2.63977	-56.6031	1.14622	-55.0781	1.52044	-54.0812	0.939941	-58.7531	0.950432
		-52.55	2.75812	-55.0031	3.21598	-45.1125	3.21646	-51.0375	2.63872		-52.5875	2.68354	-56.4281	1.1899	-54.9531	1.51062	-54.0469	0.949287	-58.7062	0.941944
		-52.55	2.73876	-55.0031	3.2341	-45.1125	2.9583	-51.0375	2.63872		-52.5875	2.72903	-56.4281	1.24035	-54.9531	1.5029	-54.0469	0.957775	-58.7062	0.932026
		-52.375	2.71931	-54.9	3.24841	-45.0812	2.69604	-50.9	2.63796		-52.4062	2.77557	-56.5438	1.29709	-54.8906	1.49803	-54.0594	0.965405	-58.5844	0.920582
		-52.375	2.70033	-54.9	3.25928	-45.0812	2.4313	-50.9	2.63672		-52.4062	2.82211	-56.5438	1.35956	-54.8906	1.49679	-54.0594	0.971222	-58.5844	0.908184
		-52.325	2.68326	-54.7781	3.26719	-44.9813	2.16599	-50.8937	2.63538		-52.225	2.86722	-56.5094	1.42717	-54.8937	1.49937	-54.0594	0.975609	-58.5344	0.895405
		-52.325	2.66838	-54.7781	3.27291	-44.9813	1.90172	-50.8937	2.63481		-52.225	2.91014	-56.5094	1.49937	-54.8937	1.50623	-54.0594	0.978947	-58.5344	0.881767
		-52.2062	2.65636	-54.6156	3.27721	-44.9437	1.64003	-50.9969	2.63519		-52.0812	2.95048	-56.4156	1.57528	-54.9094	1.51758	-54.0062	0.980949	-58.4813	0.867653
		-52.2062	2.64807	-54.6156	3.28074	-44.9437	1.38283	-50.9969	2.63653		-52.0812	2.9871	-56.4156	1.65358	-54.9094	1.53332	-54.0062	0.981617	-58.4813	0.853157
		-52.0562	2.64311	-54.4594	3.28426	-44.925	1.13144	-50.8656	2.6392		-51.975	3.01933	-56.3844	1.73368	-54.9437	1.55334	-53.9156	0.981236	-58.5375	0.838566
		-52.0562	2.64177	-54.4594	3.28798	-44.925	0.887299	-50.8656	2.64339		-51.975	3.04718	-56.3844	1.81475	-54.9437	1.57728	-53.9156	0.979805	-58.5375	0.824165
		-52.15	2.64387	-54.2812	3.29247	-44.7781	0.652218	-50.6656	2.64921		-51.7844	3.07026	-56.2687	1.89543	-54.8844	1.60465	-53.825	0.977421	-58.6	0.809097
		-52.15	2.64921	-54.2812	3.29866	-44.7781	0.427151	-50.6656	2.65627		-51.7844	3.08819	-56.2687	1.97496	-54.8844	1.63498	-53.825	0.974178	-58.6	0.793743
		-52.1688	2.65732	-54.1906	3.30667	-44.65	0.213528	-50.4188	2.6639		-51.6781	3.10097	-56.2469	2.05231	-54.7531	1.6675	-53.8594	0.970173	-58.4437	0.778675
		-52.1688	2.66829	-54.1906	3.31659	-44.65	0.0128746	-50.4188	2.67229		-51.6781	3.1086	-56.2469	2.1265	-54.7531	1.70116	-53.8594	0.965691	-58.4437	0.763512
		-52.025	2.68173	-54.1719	3.32851	-44.7781	-0.174046	-50.3062	2.68068		-51.6125	3.11146	-55.9844	2.1966	-54.5375	1.73512	-53.9156	0.960159	-58.45	0.748539
		-52.025	2.69709	-54.1719	3.34272	-44.7781	-0.346661	-50.3062	2.68879		-51.6125	3.11003	-55.9844	2.26164	-54.5375	1.76878	-53.9156	0.954247	-58.45	0.734138
		-51.5031	2.71482	-54.025	3.35903	-44.9031	-0.504494	-50.35	2.69594		-51.5187	3.10421	-55.9375	2.32143	-54.4781	1.8013	-53.9219	0.948143	-58.3594	0.719833
		-51.5031	2.73504	-54.025	3.37677	-44.9031	-0.646877	-50.35	2.70157		-51.5187	3.09477	-55.9375	2.37484	-54.4781	1.83163	-53.9219	0.941658	-58.3594	0.706768
		-51.375	2.75764	-53.8625	3.39613	-45.0875	-0.774193	-50.3156	2.70519		-51.3406	3.08189	-55.8875	2.42128	-54.5531	1.85881	-53.8062	0.935078	-58.3062	0.695515
		-51.375	2.78254	-53.8625	3.41663	-45.0875	-0.886822	-50.3156	2.70615		-51.3406	3.06578	-55.8875	2.46058	-54.5531	1.88274	-53.8062	0.928593	-58.3062	0.685978
		-51.3937	2.81038	-53.6562	3.43704	-45.2656	-0.985432	-50.1594	2.70443		-51.2	3.04708	-55.8031	2.49214	-54.4656	1.90268	-53.5781	0.922394	-58.4031	0.679016
		-51.3937	2.84147	-53.6562	3.45688	-45.2656	-1.07117	-50.1594	2.69909		-51.2	3.0262	-55.8031	2.51598	-54.4656	1.91813	-53.5781	0.916481	-58.4031	0.675488
		-51.5344	2.876	-53.5531	3.47567	-45.1312	-1.14517	-49.9	2.69022		-51	3.0036	-55.7156	2.53172	-54.3812	1.92909	-53.4719	0.911713	-58.3344	0.675583
		-51.5344	2.91433	-53.5531	3.49216	-45.1312	-1.20935	-49.9	2.67782		-51	2.97966	-55.7156	2.53916	-54.3812	1.93472	-53.4719	0.907993	-58.3344	0.679493
		-51.3844	2.95668	-53.4531	3.50513	-45.0187	-1.26514	-49.8438	2.66171		-50.9156	2.95448	-55.5844	2.53906	-54.2188	1.93558	-53.6531	0.905037	-58.1375	0.688362
		-51.3844	3.00293	-53.4531	3.51391	-45.0187	-1.31426	-49.8438	2.64196		-50.9156	2.92835	-55.5844	2.53134	-54.2188	1.93157	-53.6531	0.90332	-58.1375	0.702095
		-51.275	3.05319	-53.3187	3.51772	-45.3937	-1.3588	-49.7719	2.61927		-50.7875	2.90174	-55.2969	2.51637	-54.075	1.9228	-53.6844	0.902939	-58.1437	0.720692
		-51.275	3.10726	-53.3187	3.51543	-45.3937	-1.40009	-49.7719	2.59409		-50.7875	2.87466	-55.2969	2.49491	-54.075	1.90964	-53.6844	0.903606	-58.1437	0.743961
		-51.025	3.16486	-53.1844	3.50599	-45.4312	-1.43976	-49.6531	2.56681		-50.8	2.84729	-55.1094	2.46706	-54.0312	1.89209	-53.6406	0.904751	-58.3656	0.771618
		-51.025	3.22542	-53.1844	3.48902	-45.4312	-1.47924	-49.6531	2.5382		-50.8	2.81973	-55.1094	2.43359	-54.0312	1.87073	-53.6406	0.906467	-58.3656	0.803089
		-50.8781	3.28817	-52.9688	3.46346	-45.525	-1.51958	-49.4906	2.50902		-50.6719	2.7916	-55.2188	2.39515	-53.8969	1.84593	-53.5687	0.908375	-58.45	0.837421
		-50.8781	3.35264	-52.9688	3.42875	-45.525	-1.56136	-49.4906	2.48013		-50.6719	2.76299	-55.2188	2.35252	-53.8969	1.81808	-53.5687	0.909519	-58.45	0.874138
		-50.8656	3.41797	-52.8563	3.38478	-45.3156	-1.60456	-49.3156	2.45199		-50.4406	2.73409	-55.1375	2.30637	-53.8469	1.78747	-53.5562	0.909519	-58.3094	0.911713
		-50.8656	3.48339	-52.8563	3.33099	-45.3156	-1.64957	-49.3156	2.42538		-50.4406	2.70424	-55.1375	2.25744	-53.8469	1.75467	-53.5562	0.907898	-58.3094	0.949287
		-50.725	3.54805	-52.525	3.26748	-45.25	-1.69554	-49.2906	2.40097		-50.4	2.67324	-54.9688	2.20623	-53.95	1.71995	-53.5469	0.904083	-58.2156	0.985909
		-50.725	3.61137	-52.525	3.19433	-45.25	-1.74179	-49.2906	2.37885		-50.4	2.64111	-54.9688	2.15349	-53.95	1.68343	-53.5469	0.897121	-58.2156	1.01967
		-50.5844	3.6727	-52.4188	3.11184	-45.4344	-1.78814	-49.2281	2.35901		-50.3312	2.60754	-54.9688	2.09961	-53.8219	1.64537	-53.3937	0.887012	-58.1031	1.05
		-50.5844	3.73135	-52.4188	3.02038	-45.4344	-1.83334	-49.2281	2.34127		-50.3312	2.57244	-54.9688	2.04515	-53.8219	1.60627	-53.3937	0.873566	-58.1031	1.07622
		-50.3281	3.78733	-52.4031	2.92025	-45.5594	-1.87569	-49.2125	2.32534		-50.15	2.53582	-54.8344	1.9908	-53.6906	1.56622	-53.3438	0.856113	-57.9594	1.09749
		-50.3281	3.84035	-52.4031	2.81229	-45.5594	-1.91422	-49.2125	2.31085		-50.15	2.49777	-54.8344	1.93663	-53.6906	1.52531	-53.3438	0.834846	-57.9594	1.11265
		-50.1719	3.89023	-52.3219	2.69728	-45.6469	-1.94788	-49.15	2.29683		-50.15	2.4581	-54.7594	1.88293	-53.6031	1.48382	-53.2875	0.810051	-58.0531	1.12152
		-50.1719	3.93734	-52.3219	2.57607	-45.6469	-1.97573	-49.15	2.28243		-50.15	2.41709	-54.7594	1.83039	-53.6031	1.44205	-53.2875	0.782108	-58.0531	1.12457
		-49.9406	3.98188	-52.1156	2.44942	-45.7375	-1.9969	-49.1406	2.26669		-49.9625	2.37551	-54.7062	1.77946	-53.6	1.40009	-53.2188	0.751305	-57.9437	1.122
		-49.9406	4.02451	-52.1156	2.318	-45.7375	-2.01073	-49.1406	2.24829		-49.9625	2.33355	-54.7062	1.73006	-53.6	1.35832	-53.2188	0.718403	-57.9437	1.11389
		-49.7875	4.06609	-51.9844	2.18306	-46.1312	-2.01702	-49.0562	2.22673		-49.8281	2.29187	-54.5844	1.68228	-53.4312	1.31674	-53.3	0.683975	-57.7156	1.10064
		-49.7875	4.107	-51.9844	2.04554	-46.1312	-2.0153	-49.0562	2.20098		-49.8281	2.25134	-54.5844	1.6366	-53.4312	1.27583	-53.3	0.64888	-57.7156	1.0829
		-49.7	4.14839	-51.9219	1.90601	-46.15	-2.00567	-48.8875	2.17037		-49.7562	2.21233	-54.4875	1.59311	-53.3906	1.23596	-53.25	0.614262	-57.85	1.06182
		-49.7	4.19121	-51.9219	1.76544	-46.15	-1.98841	-48.8875	2.1348		-49.7562	2.17571	-54.4875	1.55191	-53.3906	1.19696	-53.25	0.580502	-57.85	1.03846
		-49.6437	4.23632	-51.9375	1.62487	-46.1469	-1.96381	-48.5281	2.09379		-49.5281	2.14205	-54.4813	1.5132	-53.5062	1.15938	-53.2469	0.548553	-57.875	1.01337
		-49.6437	4.28476	-51.9375	1.48478	-46.1469	-1.93224	-48.5281	2.04735		-49.5281	2.11182	-54.4813	1.47734	-53.5062	1.12352	-53.2469	0.519276	-57.875	0.98772
		-49.45	4.33741	-51.8	1.34611	-46.05	-1.89447	-48.4	1.99566		-49.7219	2.08578	-54.5344	1.44405	-53.5875	1.08967	-53.1	0.493145	-57.7719	0.962353
		-49.45	4.3952	-51.8	1.20993	-46.05	-1.85108	-48.4	1.93949		-49.7219	2.06423	-54.5344	1.41335	-53.5875	1.05791	-53.1	0.470734	-57.7719	0.937748
		-49.0875	4.45881	-51.8344	1.07641	-46.1844	-1.80235	-48.3937	1.87931		-49.6875	2.04706	-54.4437	1.3855	-53.2969	1.02825	-53.1937	0.452423	-57.7625	0.91486
		-49.0875	4.52852	-51.8344	0.946331	-46.1844	-1.74913	-48.3937	1.8158		-49.6875	2.03419	-54.4437	1.36032	-53.2969	1.00088	-53.1937	0.438595	-57.7625	0.894356
		-48.8812	4.60472	-51.7469	0.820255	-46.175	-1.6922	-48.4219	1.7498		-49.4594	2.0256	-54.3438	1.33829	-53.1344	0.975513	-53.2781	0.428963	-57.5812	0.876713
		-48.8812	4.6875	-51.7469	0.698662	-46.175	-1.63183	-48.4219	1.68209		-49.4594	2.02055	-54.3438	1.31893	-53.1344	0.952053	-53.2781	0.423908	-57.5812	0.862122
		-48.8	4.77667	-51.7969	0.582695	-46.5094	-1.5687	-48.4	1.61362		-49.4562	2.01864	-54.3187	1.30215	-53.2156	0.930309	-53.2219	0.423431	-57.6094	0.850391
		-48.8	4.87185	-51.7969	0.472164	-46.5094	-1.50356	-48.4	1.54476		-49.4562	2.01883	-54.3187	1.28822	-53.2156	0.90971	-53.2219	0.42696	-57.6094	0.841808
		-48.7719	4.97227	-51.6937	0.367641	-46.4781	-1.43671	-48.4031	1.476		-49.3875	2.01998	-54.3344	1.27659	-53.3094	0.889874	-53.2375	0.434589	-57.7125	0.8358
		-48.7719	5.07708	-51.6937	0.269699	-46.4781	-1.36871	-48.4031	1.40772		-49.3875	2.02131	-54.3344	1.26762	-53.3094	0.870132	-53.2375	0.445652	-57.7125	0.832558
		-48.7	5.18522	-51.8312	0.178623	-46.7	-1.30053	-48.3563	1.3401		-49.2531	2.02141	-54.0875	1.26123	-53.45	0.849915	-53.0906	0.459671	-57.6844	0.831604
		-48.7	5.29566	-51.8312	0.0946999	-46.7	-1.23281	-48.3563	1.27325		-49.2531	2.01931	-54.0875	1.25675	-53.45	0.828457	-53.0906	0.476646	-57.6844	0.832176
		-48.3344	5.40686	-51.7188	0.0179291	-46.5844	-1.16587	-48.3781	1.20726		-49.2594	2.01406	-54.1156	1.25408	-53.2531	0.805092	-53.2031	0.496006	-57.7062	0.834179
		-48.3344	5.51739	-51.7188	-0.0514984	-46.5844	-1.10064	-48.3781	1.14183		-49.2594	2.00481	-54.1156	1.25322	-53.2531	0.779247	-53.2031	0.517178	-57.7062	0.836658
[truncated: 1,747 more rows]

## Sheet: Figure 2S4
Panel A	Control		Stim. #1	Stim. #2	Stim. #3	Stim. #4	Stim. #5	TTX		Stim. #1	Stim. #2	Stim. #3	Stim. #4	Stim. #5		Panel B		1.4	1.5	1.6	1.7	1.8
[truncated: 12 more rows]
