# Supplementary material for: Dendritic sodium spikes are required for long-term potentiation at distal synapses on hippocampal pyramidal neurons
Source: eLife. 2015 Aug 6;4:e06414. doi: 10.7554/eLife.06414 (PMC4576155; doi:10.7554/eLife.06414)
Supplement: Figure 3—source data 1. — DOI: http://dx.doi.org/10.7554/eLife.06414.015 [file elife06414s005.xlsx]

## Sheet: Figure 3
Panel A	sampling rate 50000Hz		Panel B	Top			Down		Panel C	Top			Down		Panel D	control		TTX			Panel E		TBSx3+Current		TBSx3+SomaticVC
	-70.0627			sampling rate 50000 Hz			sampling rate 0.05 Hz			sampling rate 50000 Hz			sampling rate 0.05 Hz			mean	SEM	mean	SEM				control	TTX	control	TTX
	-70.0653			1	2					1	2					0.936703	0.0468076	1.0448	0.0368555				1.21272	0.926068	1.95888	1.24845
	-70.0678			-66.6841	-66.0445		3.43439			-67.3795	-67.0133		2.98426			0.942606	0.0274925	0.956897	0.0677191				1.3804	1.15871	1.31897	0.992105
	-70.0702			-66.6854	-66.0456		2.86258			-67.38	-67.0124		1.3627			1.0569	0.0443053	1.01457	0.0549086				1.534	0.75656	1.56208	0.863587
	-70.0725			-66.686	-66.0474		2.7308			-67.3803	-67.0119		2.42761			0.993493	0.0361051	0.999402	0.046662				1.51997	1.02643	1.24926	1.459
	-70.0748			-66.6858	-66.0498		3.50572			-67.3804	-67.012		2.84867			1.02502	0.0377811	0.954996	0.0230063				2.82908	0.712732	1.36988	1.24067
	-70.0771			-66.6847	-66.0526		3.5798			-67.3804	-67.0126		3.19238			0.961957	0.0286761	0.978872	0.0352163				1.44194	1.34961	1.48378	0.923589
	-70.0794			-66.683	-66.0554		2.30322			-67.3805	-67.0137		2.43231			1.05707	0.044933	0.992453	0.0314384				1.54978	1.43785	1.58531	0.883197
	-70.0818			-66.681	-66.058		3.70784			-67.3809	-67.0152		2.56309			1.02625	0.0331079	1.07524	0.0198817				1.41623	1.21783	1.60641	0.802355
	-70.0843			-66.6789	-66.0603		3.27559			-67.3819	-67.0168		3.19526										1.74471		1.64439
	-70.0869			-66.6772	-66.062		2.72083			-67.3833	-67.0183		2.80269
	-70.0894			-66.6759	-66.0633		3.02381			-67.3851	-67.0193		2.76221			1.56348	0.277985	1.20941	0.170501			Mean	1.62543	1.07322	1.531	1.05162
	-70.0919			-66.675	-66.0643		2.41815			-67.3869	-67.0197		3.67763			1.4364	0.181931	1.16262	0.129006			SEM	0.157938	0.0936973	0.0705202	0.0830486
	-70.0942			-66.6743	-66.0651		3.25965			-67.3886	-67.0194		3.36509			1.47009	0.183083	1.11966	0.125143
	-70.0963			-66.6734	-66.0658		2.62777			-67.3898	-67.0183		2.85663			1.39565	0.152583	1.12606	0.100475
	-70.0981			-66.6724	-66.0663		3.32177			-67.3904	-67.0168		3.39738			1.35485	0.119053	1.17218	0.131988
	-70.0994			-66.6711	-66.0666		2.84922			-67.3902	-67.0151		2.81784			1.46969	0.14098	1.09029	0.13603
	-70.1002			-66.6698	-66.0664		2.2499			-67.3891	-67.0136		2.79224			1.43109	0.167863	1.08944	0.0800501
	-70.1005			-66.6687	-66.0656		3.0485			-67.3871	-67.0125		4.44504			1.69214	0.262234	1.06375	0.114655
	-70.1004			-66.6681	-66.0642		2.72252			-67.3844	-67.0119		3.46869			1.62976	0.294237	1.03351	0.072946
	-70.0998			-66.668	-66.0623		2.56919			-67.3812	-67.012		3.71606			1.62116	0.203155	1.02897	0.0603759
	-70.0987			-66.6685	-66.0603		3.46477			-67.3779	-67.0124		3.25184			1.64232	0.1972	1.10279	0.0503918
	-70.0973			-66.6693	-66.0585					-67.375	-67.013					1.52271	0.18777	1.09431	0.0860395
	-70.0955			-66.6701	-66.057		6.0496			-67.3728	-67.0136		3.61467			1.60079	0.200314	1.03382	0.0834438
	-70.0934			-66.6709	-66.0561		5.68633			-67.3716	-67.0143		2.87284			1.53018	0.133783	1.06199	0.0963332
	-70.091			-66.6714	-66.0557		4.8584			-67.3715	-67.0148		3.09875			1.56394	0.163411	1.08369	0.0851758
	-70.0883			-66.6717	-66.0558		3.85826			-67.3722	-67.0153		3.21789			1.5266	0.0981986	1.14587	0.103505
	-70.0855			-66.6719	-66.0561		4.22824			-67.3736	-67.0157		3.47947			1.58209	0.175909	1.04517	0.0635062
	-70.0824			-66.672	-66.0564		4.16769			-67.375	-67.0158		3.47771			1.54611	0.192247	1.09372	0.086057
	-70.0792			-66.6723	-66.0564		4.7127			-67.3762	-67.0157		3.07855			1.64601	0.280763	1.13195	0.0852255
	-70.0757			-66.6729	-66.056		4.61305			-67.3769	-67.0154		3.68647			1.58566	0.169448	1.10406	0.0614422
	-70.0721			-66.6737	-66.0552		5.31414			-67.3769	-67.015		3.97335			1.64138	0.198476	1.03823	0.0803427
	-70.0682			-66.6748	-66.0542		3.72528			-67.3764	-67.0149		4.77927			1.62093	0.165622	1.04472	0.0882976
	-70.0641			-66.6763	-66.053		4.68635			-67.3756	-67.0152		3.11544			1.53239	0.203817	1.09039	0.0712451
	-70.0598			-66.6782	-66.0518		4.69262			-67.3749	-67.0161		3.80277			1.68742	0.192701	1.00517	0.0985636
	-70.0552			-66.6802	-66.0507		4.54606			-67.3747	-67.0177		3.33389			1.60937	0.1934	1.0837	0.125115
	-70.0505			-66.6822	-66.0495		4.75897			-67.3753	-67.0197		3.60314			1.53068	0.143648	1.11864	0.120922
	-70.0455			-66.6838	-66.0485		4.84125			-67.377	-67.0218		3.47964			1.60899	0.260312	1.04326	0.0861275
	-70.0405			-66.6849	-66.0476		4.9036			-67.3794	-67.0239		3.42063			1.66625	0.145831	1.11679	0.110367
	-70.0353			-66.6853	-66.0471		5.0541			-67.3823	-67.0256		4.56129			1.66115	0.261054	1.05257	0.086571
	-70.0301			-66.6849	-66.047		5.37338			-67.3851	-67.0267		2.64471			1.72429	0.234604	1.03486	0.0945754
	-70.0249			-66.6838	-66.0474		4.60692			-67.3873	-67.0271		3.80653
	-70.0199			-66.6823	-66.0483		4.55095			-67.389	-67.0272		4.45784
	-70.015			-66.6806	-66.0493		2.89351			-67.39	-67.0271		2.73397
	-70.0105			-66.6789	-66.0504		4.81758			-67.3906	-67.0274		1.98746
	-70.0065			-66.6775	-66.0513		4.57029			-67.3911	-67.0284		2.58926
	-70.0031			-66.6765	-66.0519		5.42443			-67.3915	-67.0303		2.72741
	-70.0006			-66.6759	-66.0522		4.95494			-67.3919	-67.0331		3.71208
	-69.999			-66.6758	-66.0524		5.99966			-67.3923	-67.0363		3.50629
	-69.9984			-66.6758	-66.0525		5.14304			-67.3927	-67.0393		3.79707
	-69.9989			-66.6759	-66.0525		4.67395			-67.3932	-67.0415		3.44093
	-70.0004			-66.6758	-66.0526		5.0935			-67.394	-67.0426		3.52889
	-70.0028			-66.6756	-66.0525		4.99566			-67.395	-67.0423		3.18485
	-70.0059			-66.6752	-66.0522		5.93668			-67.3963	-67.0411		3.72738
	-70.0097			-66.6747	-66.0514		4.96891			-67.3979	-67.0392		3.67098
	-70.014			-66.6742	-66.05		4.71302			-67.3996	-67.037		3.28331
	-70.0186			-66.6738	-66.048		5.2063			-67.4011	-67.0348		3.82378
	-70.0236			-66.6735	-66.0456		4.65928			-67.4023	-67.0328		2.79569
	-70.0287			-66.6732	-66.0429		6.08327			-67.4028	-67.0311		4.03589
	-70.0338			-66.6729	-66.04		4.17721			-67.4027	-67.0298		3.33698
	-70.0389			-66.6727	-66.0373		5.14184			-67.4018	-67.0288		3.3456
	-70.0439			-66.6726	-66.0349		5.22267			-67.4005	-67.0284		3.49179
	-70.0486			-66.6728	-66.0331		4.05586			-67.3988	-67.0285		3.82693
	-70.0529			-66.6734	-66.0322		4.94416			-67.397	-67.029		3.33935
	-70.0567			-66.6744	-66.0322		4.99102			-67.3952	-67.0298		4.04615
	-70.0601			-66.6756	-66.0332		4.63421			-67.3934	-67.0307		2.48546
	-70.063			-66.6767	-66.0353		4.84332			-67.3917	-67.0314		4.2788
	-70.0655			-66.6775	-66.0382		4.14312			-67.39	-67.032		3.59348
	-70.0677			-66.6777	-66.0415		4.92429			-67.3884	-67.0323		4.03432
	-70.0698			-66.6772	-66.0447		3.72179			-67.387	-67.0323		3.86653
	-70.0719			-66.6761	-66.0476		4.39964			-67.3861	-67.0321		3.51811
	-70.074			-66.6747	-66.0498		5.01206			-67.3856	-67.0316		4.17618
	-70.0763			-66.6734	-66.0514		5.18981			-67.3857	-67.0309		3.55758
	-70.0785			-66.6725	-66.0523		4.54145			-67.3861	-67.0299		3.17071
	-70.0807			-66.6724	-66.0528		4.9429			-67.3865	-67.0289		4.00663
	-70.0824			-66.6731	-66.0532		4.9482			-67.3866	-67.028		3.81235
	-70.0836			-66.6745	-66.0535		5.77813			-67.3862	-67.0272		3.94461
	-70.0841			-66.6763	-66.0539		5.61556			-67.3852	-67.0266		3.65559
	-70.0838			-66.6783	-66.0543		5.68462			-67.3839	-67.0262		4.2726
	-70.0826			-66.6803	-66.0547		4.80855			-67.3826	-67.0261		4.51076
	-70.0805			-66.6821	-66.0548		4.43381			-67.3816	-67.0262		3.73418
	-70.0779			-66.6837	-66.0545		5.40143			-67.3812	-67.0268		3.28272
	-70.0749			-66.6848	-66.0538		5.0049			-67.3815	-67.028		4.80542
	-70.0719			-66.6855	-66.0525		4.70569			-67.3825	-67.03		4.37556
	-70.0693			-66.6858	-66.051		5.14413			-67.3843	-67.0326		3.83661
	-70.0672			-66.6857	-66.0495		5.27844			-67.3868	-67.0356		2.76772
	-70.066			-66.6852	-66.0483		4.38193			-67.3897	-67.0385		2.65409
	-70.0657			-66.6844	-66.0475		5.16532			-67.3927	-67.041		2.82214
	-70.0663			-66.6835	-66.0473		5.15381			-67.3953	-67.0428		3.46089
	-70.0678			-66.6825	-66.0475		5.07666			-67.397	-67.0436		3.16708
	-70.0699			-66.6815	-66.0478		4.90326			-67.3977	-67.0436		3.44786
	-70.0723			-66.6806	-66.048		3.73934			-67.3971	-67.0429		3.50884
	-70.0747			-66.6798	-66.0479		3.98632			-67.3956	-67.0419		3.47408
	-70.0769			-66.6792	-66.0474		5.23799			-67.3936	-67.0408		2.48185
	-70.0786			-66.679	-66.0467		5.37766			-67.3914	-67.0398		3.44218
	-70.0798			-66.6791	-66.0459		4.79591			-67.3897	-67.0393		3.81572
	-70.0802			-66.6798	-66.0453		5.19246			-67.3884	-67.0393		3.62924
	-70.08			-66.6809	-66.0448		4.44704			-67.3878	-67.0398		3.50275
	-70.0793			-66.6822	-66.0447		5.36123			-67.3875	-67.0406		2.92403
	-70.0783			-66.6835	-66.0448		5.01476			-67.3874	-67.0417		3.08874
	-70.077			-66.6847	-66.0452		4.54301			-67.3872	-67.043		3.82847
	-70.0759			-66.6856	-66.0458		4.94148			-67.387	-67.0445		4.34134
	-70.0751			-66.6861	-66.0464		5.0036			-67.3867	-67.0462		3.92487
	-70.0747			-66.6863	-66.047		4.76734			-67.3865	-67.0482		3.17344
	-70.0751			-66.6864	-66.0475		4.41523			-67.3864	-67.0504		3.9819
	-70.0762			-66.6865	-66.0479		4.14907			-67.3865	-67.0525		4.34023
	-70.0781			-66.6866	-66.0481		4.6146			-67.3867	-67.0544		3.86832
	-70.0808			-66.6867	-66.0485		4.46142			-67.3871	-67.0556		3.352
	-70.0842			-66.6866	-66.049		4.46479			-67.3878	-67.0559		3.35829
	-70.088			-66.6862	-66.0497					-67.3888	-67.055		3.70978
	-70.092			-66.6855	-66.0506					-67.39	-67.0528		3.9212
	-70.0958			-66.6845	-66.0517					-67.3915	-67.0495		3.0294
	-70.0993			-66.6832	-66.0526					-67.393	-67.0454		3.79587
	-70.1022			-66.6818	-66.0532					-67.3943	-67.0407
	-70.1042			-66.6803	-66.0534					-67.3954	-67.0358
	-70.1052			-66.6789	-66.0533					-67.3964	-67.0311
	-70.1054			-66.6775	-66.0528					-67.3972	-67.0268
	-70.1046			-66.6763	-66.0521					-67.398	-67.0232
	-70.103			-66.6751	-66.0513					-67.3989	-67.0204
	-70.1009			-66.6742	-66.0507					-67.3998	-67.0184
	-70.0983			-66.6734	-66.0505					-67.4005	-67.0175
	-70.0954			-66.6726	-66.0506					-67.4009	-67.0178
	-70.0924			-66.672	-66.0512					-67.4009	-67.0193
	-70.0894			-66.6714	-66.052					-67.4003	-67.0219
	-70.0865			-66.6709	-66.0529					-67.3992	-67.0253
	-70.0838			-66.6706	-66.0537					-67.3976	-67.0289
	-70.0816			-66.6707	-66.0544					-67.3956	-67.0323
	-70.0797			-66.6714	-66.0549					-67.3934	-67.0348
	-70.0784			-66.6725	-66.0553					-67.3913	-67.0361
	-70.0777			-66.674	-66.0557					-67.3895	-67.0362
	-70.0775			-66.6757	-66.0561					-67.3878	-67.0353
	-70.0779			-66.6776	-66.0564					-67.3866	-67.034
	-70.0787			-66.6794	-66.0566					-67.3856	-67.0328
	-70.0797			-66.6811	-66.0564					-67.3851	-67.0321
	-70.0808			-66.6825	-66.0557					-67.3852	-67.0321
	-70.0818			-66.6838	-66.0546					-67.3859	-67.0327
	-70.0826			-66.6849	-66.053					-67.3874	-67.0338
	-70.0829			-66.6858	-66.0512					-67.3894	-67.0349
	-70.0827			-66.6866	-66.0493					-67.3917	-67.036
	-70.0821			-66.6871	-66.0473					-67.3941	-67.0368
	-70.0809			-66.6876	-66.0456					-67.3961	-67.0373
	-70.0794			-66.6879	-66.044					-67.3977	-67.0375
	-70.0776			-66.6882	-66.0426					-67.3987	-67.0375
	-70.0757			-66.6887	-66.0416					-67.3992	-67.0375
	-70.0737			-66.6894	-66.0408					-67.3992	-67.0375
	-70.0719			-66.6903	-66.0403					-67.3988	-67.0378
	-70.0704			-66.6914	-66.0404					-67.3984	-67.0382
	-70.0695			-66.6925	-66.041					-67.3981	-67.039
	-70.0691			-66.6934	-66.0421					-67.398	-67.0403
	-70.0696			-66.6938	-66.0437					-67.3983	-67.0421
	-70.071			-66.6938	-66.0456					-67.3988	-67.0446
	-70.0733			-66.6934	-66.0476					-67.3994	-67.0477
	-70.0766			-66.6927	-66.0495					-67.3999	-67.0511
	-70.0807			-66.692	-66.0512					-67.4004	-67.0546
	-70.0853			-66.6915	-66.0525					-67.4009	-67.0577
	-70.0902			-66.6911	-66.0534					-67.4015	-67.0602
	-70.0951			-66.6909	-66.0538					-67.4023	-67.062
	-70.0996			-66.6905	-66.0537					-67.4034	-67.0632
	-70.1033			-66.6897	-66.053					-67.4045	-67.0639
	-70.1063			-66.6883	-66.052					-67.4054	-67.0642
	-70.1083			-66.6863	-66.0508					-67.4058	-67.0642
	-70.1095			-66.6841	-66.0496					-67.4056	-67.064
	-70.1101			-66.6819	-66.0487					-67.4051	-67.0634
	-70.1103			-66.6801	-66.0481					-67.4046	-67.0625
	-70.1104			-66.679	-66.0478					-67.4046	-67.0611
	-70.1105			-66.6789	-66.0476					-67.4055	-67.0594
	-70.1107			-66.6796	-66.0473					-67.4076	-67.0574
	-70.1111			-66.6811	-66.0469					-67.4106	-67.0551
	-70.1115			-66.6831	-66.0464					-67.4143	-67.0527
	-70.1115			-66.6854	-66.0459					-67.4182	-67.0503
	-70.111			-66.6875	-66.0455					-67.4217	-67.0481
	-70.1098			-66.689	-66.0453					-67.4246	-67.0461
	-70.1076			-66.6898	-66.0454					-67.4269	-67.0445
	-70.1044			-66.6897	-66.046					-67.4286	-67.0433
	-70.1004			-66.6888	-66.047					-67.4302	-67.0427
	-70.0957			-66.6875	-66.0485					-67.4317	-67.0424
	-70.0907			-66.6863	-66.0501					-67.4332	-67.0426
	-70.0858			-66.6856	-66.0516					-67.4344	-67.043
	-70.0812			-66.6854	-66.0526					-67.4352	-67.0433
	-70.0775			-66.6857	-66.0529					-67.4351	-67.0434
	-70.0747			-66.6863	-66.0524					-67.4339	-67.0431
	-70.0731			-66.687	-66.0511					-67.4316	-67.0425
	-70.0727			-66.6874	-66.0493					-67.4286	-67.0418
	-70.0734			-66.6877	-66.0473					-67.4251	-67.0414
	-70.0751			-66.6878	-66.0455					-67.4217	-67.0414
	-70.0775			-66.6879	-66.0441					-67.4186	-67.042
	-70.0804			-66.6881	-66.0432					-67.4162	-67.0431
	-70.0835			-66.6883	-66.0427					-67.4145	-67.0444
	-70.0865			-66.6883	-66.0425					-67.4134	-67.0457
	-70.0893			-66.6881	-66.0425					-67.4127	-67.0466
	-70.0917			-66.6876	-66.0426					-67.4123	-67.0472
	-70.0935			-66.6869	-66.0428					-67.4117	-67.0473
	-70.0947			-66.6861	-66.0431					-67.411	-67.0471
	-70.0954			-66.6856	-66.0433					-67.4102	-67.0466
	-70.0956			-66.6855	-66.0434					-67.4093	-67.046
	-70.0952			-66.6859	-66.0436					-67.4085	-67.0453
	-70.0946			-66.6868	-66.0438					-67.408	-67.0446
	-70.0937			-66.688	-66.0441					-67.4079	-67.0439
	-70.0927			-66.6895	-66.0447					-67.408	-67.043
	-70.0917			-66.691	-66.0456					-67.4083	-67.0419
	-70.0907			-66.6923	-66.0468					-67.4087	-67.0407
	-70.0899			-66.6934	-66.0483					-67.409	-67.0394
	-70.0894			-66.6942	-66.0499					-67.4095	-67.0379
	-70.0891			-66.6946	-66.0517					-67.4102	-67.0364
	-70.0891			-66.6946	-66.0535					-67.4115	-67.0348
	-70.0894			-66.6943	-66.055					-67.4133	-67.0332
	-70.0898			-66.6937	-66.0562					-67.4154	-67.0316
	-70.0904			-66.6929	-66.0569					-67.4176	-67.03
	-70.0912			-66.692	-66.0572					-67.4194	-67.0283
	-70.0919			-66.6911	-66.0571					-67.4205	-67.0266
	-70.0928			-66.6901	-66.0569					-67.4209	-67.025
	-70.0936			-66.6892	-66.0568					-67.4207	-67.0238
	-70.0946			-66.6885	-66.0569					-67.4202	-67.0232
	-70.0956			-66.6878	-66.0571					-67.4196	-67.0235
	-70.0967			-66.6873	-66.0574					-67.4192	-67.0247
	-70.0979			-66.6869	-66.0576					-67.4189	-67.0268
	-70.099			-66.6866	-66.0576					-67.4188	-67.0298
	-70.0998			-66.6861	-66.0574					-67.4186	-67.0332
	-70.1003			-66.6855	-66.057					-67.4182	-67.0368
	-70.1002			-66.6848	-66.0566					-67.4174	-67.04
	-70.0992			-66.6839	-66.0563					-67.4162	-67.0425
	-70.0974			-66.6831	-66.0559					-67.4147	-67.0439
	-70.0947			-66.6824	-66.0557					-67.4131	-67.0439
	-70.0913			-66.6819	-66.0555					-67.4116	-67.0426
	-70.0873			-66.6816	-66.0555					-67.4103	-67.0402
	-70.0832			-66.6812	-66.0555					-67.4093	-67.0369
	-70.0792			-66.6807	-66.0556					-67.4084	-67.0332
	-70.0756			-66.68	-66.0557					-67.4078	-67.0294
	-70.0726			-66.679	-66.0556					-67.4073	-67.026
	-70.0704			-66.6779	-66.0552					-67.407	-67.0231
	-70.069			-66.677	-66.0546					-67.4069	-67.0208
	-70.0682			-66.6764	-66.0539					-67.4072	-67.0193
	-70.068			-66.6763	-66.0533					-67.4079	-67.0185
	-70.0682			-66.6767	-66.0531					-67.4089	-67.0183
	-70.0687			-66.6776	-66.0534					-67.4101	-67.0185
	-70.0693			-66.6787	-66.0542					-67.4114	-67.0189
	-70.0701			-66.6798	-66.0556					-67.4127	-67.0192
	-70.071			-66.6806	-66.0573					-67.4138	-67.0192
	-70.0721			-66.6811	-66.059					-67.4147	-67.0191
	-70.0734			-66.6814	-66.0604					-67.4155	-67.0192
	-70.0749			-66.6816	-66.0612					-67.4159	-67.0198
	-70.0768			-66.6819	-66.0614					-67.4161	-67.0214
	-70.0789			-66.6824	-66.0609					-67.4158	-67.024
	-70.0814			-66.683	-66.0598					-67.415	-67.0276
	-70.0841			-66.6837	-66.0585					-67.4138	-67.0317
	-70.0869			-66.6842	-66.0571					-67.4121	-67.0358
	-70.0898			-66.6845	-66.0559					-67.4103	-67.0393
	-70.0926			-66.6845	-66.055					-67.4084	-67.0419
	-70.0952			-66.6844	-66.0542					-67.4067	-67.0435
	-70.0976			-66.6842	-66.0535					-67.4055	-67.0441
	-70.0998			-66.6841	-66.0529					-67.4047	-67.0441
	-70.1018			-66.6842	-66.0522					-67.4045	-67.0438
	-70.1037			-66.6845	-66.0516					-67.4047	-67.0434
	-70.1055			-66.6847	-66.0509					-67.4052	-67.0431
	-70.1074			-66.6848	-66.0504					-67.4058	-67.043
	-70.1095			-66.6846	-66.0499					-67.4063	-67.043
	-70.1116			-66.6841	-66.0495					-67.4068	-67.0432
	-70.114			-66.6833	-66.0493					-67.4072	-67.0432
	-70.1164			-66.6824	-66.0492					-67.4078	-67.0428
	-70.1188			-66.6816	-66.0494					-67.4088	-67.0419
	-70.121			-66.681	-66.0499					-67.4104	-67.0403
	-70.1229			-66.6809	-66.0507					-67.4124	-67.0383
	-70.1243			-66.6811	-66.0517					-67.4147	-67.0361
	-70.125			-66.6816	-66.0527					-67.4171	-67.0343
	-70.1249			-66.6823	-66.0536					-67.4192	-67.0332
	-70.1239			-66.683	-66.0544					-67.4207	-67.0332
	-70.1223			-66.6838	-66.0547					-67.4213	-67.034
	-70.1201			-66.6846	-66.0548					-67.4212	-67.0353
	-70.1177			-66.6853	-66.0546					-67.4203	-67.0368
	-70.1152			-66.6861	-66.0544					-67.4189	-67.0379
	-70.1132			-66.6867	-66.0542					-67.4172	-67.0385
	-70.1118			-66.6869	-66.0544					-67.4155	-67.0384
	-70.1113			-66.6867	-66.0548					-67.414	-67.0378
	-70.1117			-66.686	-66.0557					-67.413	-67.0368
	-70.113			-66.6851	-66.0568					-67.4128	-67.0358
	-70.1152			-66.6843	-66.0579					-67.4132	-67.0347
	-70.1179			-66.6839	-66.0587					-67.4142	-67.0339
	-70.1209			-66.6842	-66.0592					-67.4155	-67.0333
	-70.124			-66.6853	-66.0591					-67.4168	-67.0328
	-70.1268			-66.6871	-66.0585					-67.4178	-67.0322
	-70.129			-66.6891	-66.0576					-67.4182	-67.0314
	-70.1306			-66.6912	-66.0566					-67.4183	-67.0303
	-70.1312			-66.6928	-66.0556					-67.4181	-67.029
	-70.1308			-66.6939	-66.0548					-67.4178	-67.0277
	-70.1295			-66.6943	-66.0544					-67.4176	-67.0266
	-70.1272			-66.694	-66.0545					-67.4172	-67.026
	-70.1242			-66.6931	-66.055					-67.4164	-67.0258
	-70.1207			-66.6919	-66.056					-67.4151	-67.0259
	-70.1172			-66.6906	-66.0572					-67.4133	-67.0262
	-70.1137			-66.6895	-66.0585					-67.4111	-67.0263
	-70.1108			-66.6888	-66.0597					-67.4089	-67.0262
	-70.1084			-66.6885	-66.0607					-67.4072	-67.0257
	-70.1067			-66.6884	-66.0615					-67.4061	-67.0251
	-70.1057			-66.6883	-66.0623					-67.406	-67.0244
	-70.1052			-66.6883	-66.063					-67.4066	-67.0241
	-70.1051			-66.6881	-66.0638					-67.4081	-67.0242
	-70.1054			-66.688	-66.0642					-67.4101	-67.0248
	-70.106			-66.6881	-66.0643					-67.4125	-67.0258
	-70.107			-66.6884	-66.0638					-67.4153	-67.0267
	-70.1085			-66.6889	-66.0627					-67.4183	-67.0273
	-70.1106			-66.6894	-66.0611					-67.4214	-67.0274
	-70.1134			-66.6896	-66.0594					-67.4242	-67.0267
	-70.117			-66.6897	-66.0579					-67.4266	-67.0256
	-70.1212			-66.6895	-66.0568					-67.4281	-67.024
	-70.126			-66.6891	-66.0564					-67.4287	-67.0224
	-70.1309			-66.6887	-66.0566					-67.4284	-67.0208
	-70.1357			-66.6882	-66.0573					-67.4273	-67.0193
	-70.1399			-66.6879	-66.0581					-67.426	-67.0178
	-70.1434			-66.6878	-66.0588					-67.4247	-67.0165
	-70.1458			-66.6879	-66.0591					-67.424	-67.0153
	-70.147			-66.6883	-66.059					-67.4239	-67.0142
	-70.1472			-66.6888	-66.0584					-67.4245	-67.0134
	-70.1464			-66.6893	-66.0577					-67.4258	-67.013
	-70.1449			-66.6899	-66.0572					-67.4275	-67.0128
	-70.143			-66.6903	-66.0569					-67.4295	-67.0129
	-70.141			-66.6906	-66.057					-67.4317	-67.0132
	-70.1393			-66.6908	-66.0574					-67.434	-67.0133
	-70.1382			-66.6909	-66.058					-67.4366	-67.0133
	-70.1378			-66.691	-66.0586					-67.4394	-67.013
	-70.1381			-66.6911	-66.0591					-67.4422	-67.0124
	-70.1392			-66.6914	-66.0596					-67.4449	-67.0117
	-70.1409			-66.6918	-66.06					-67.4469	-67.0111
	-70.143			-66.6926	-66.0603					-67.448	-67.0109
	-70.1453			-66.6936	-66.0605					-67.448	-67.0112
	-70.1475			-66.6947	-66.0604					-67.4467	-67.0118
	-70.1494			-66.6959	-66.06					-67.4443	-67.0126
	-70.151			-66.6968	-66.0591					-67.4413	-67.0131
	-70.152			-66.6972	-66.0578					-67.4378	-67.0132
	-70.1523			-66.6971	-66.0562					-67.4344	-67.0127
	-70.1518			-66.6964	-66.0546					-67.4314	-67.0115
	-70.1505			-66.6954	-66.0532					-67.429	-67.0098
	-70.1482			-66.6941	-66.0522					-67.4273	-67.0077
	-70.1449			-66.6928	-66.0518					-67.4264	-67.0055
	-70.1405			-66.6918	-66.0522					-67.4262	-67.0033
	-70.1353			-66.6912	-66.0534					-67.4267	-67.0013
	-70.1292			-66.691	-66.0551					-67.4277	-66.9998
	-70.1226			-66.6912	-66.0573					-67.4292	-66.999
	-70.1158			-66.6918	-66.0595					-67.431	-66.999
	-70.1093			-66.6924	-66.0616					-67.4329	-67
	-70.1033			-66.6929	-66.0633					-67.4345	-67.002
	-70.0982			-66.693	-66.0642					-67.4355	-67.0049
	-70.0943			-66.6927	-66.0643					-67.4356	-67.0084
	-70.0917			-66.6917	-66.0637					-67.4349	-67.0121
	-70.0904			-66.6902	-66.0626					-67.4334	-67.0156
	-70.0903			-66.6881	-66.0612					-67.4316	-67.0185
	-70.0912			-66.6856	-66.0598					-67.4298	-67.0208
	-70.0929			-66.683	-66.0586					-67.4283	-67.0224
	-70.0951			-66.6804	-66.0577					-67.4273	-67.0234
	-70.0975			-66.6783	-66.0572					-67.4267	-67.0238
	-70.0998			-66.6768	-66.0571					-67.4264	-67.0236
	-70.102			-66.6762	-66.0572					-67.4263	-67.0228
	-70.104			-66.6765	-66.0575					-67.4264	-67.0213
	-70.1057			-66.6776	-66.058					-67.4267	-67.0191
	-70.1072			-66.6796	-66.0584					-67.4273	-67.0163
	-70.1086			-66.6822	-66.0587					-67.4281	-67.0129
	-70.11			-66.6854	-66.0589					-67.429	-67.0094
	-70.1114			-66.6887	-66.0591					-67.4298	-67.0059
	-70.113			-66.6921	-66.0592					-67.4303	-67.0031
	-70.1149			-66.695	-66.0595					-67.4305	-67.0013
	-70.117			-66.6975	-66.0599					-67.4303	-67.0008
	-70.1194			-66.6995	-66.0603					-67.4297	-67.0017
	-70.1219			-66.7009	-66.0608					-67.429	-67.0036
	-70.1245			-66.7018	-66.0613					-67.428	-67.0061
	-70.127			-66.7024	-66.0617					-67.4267	-67.0088
	-70.1294			-66.7024	-66.062					-67.425	-67.0113
	-70.1315			-66.7018	-66.062					-67.4228	-67.0135
	-70.1333			-66.7006	-66.0618					-67.4203	-67.0155
	-70.1346			-66.6988	-66.0613					-67.4178	-67.0173
	-70.1356			-66.6965	-66.0604					-67.4155	-67.0189
	-70.1361			-66.6941	-66.0591					-67.414	-67.0205
	-70.1364			-66.6919	-66.0577					-67.4136	-67.0218
	-70.1364			-66.6903	-66.0564					-67.4144	-67.0229
	-70.136			-66.6893	-66.0551					-67.4165	-67.0237
	-70.1355			-66.689	-66.0542					-67.4196	-67.024
	-70.1345			-66.6894	-66.0534					-67.4234	-67.024
	-70.1331			-66.6901	-66.0527					-67.4276	-67.0237
	-70.1312			-66.6909	-66.052					-67.4317	-67.0232
	-70.1287			-66.6917	-66.0512					-67.4353	-67.0226
	-70.1255			-66.6922	-66.0506					-67.438	-67.0221
	-70.1217			-66.6924	-66.0503					-67.4395	-67.0217
	-70.1174			-66.6923	-66.0506					-67.4397	-67.0211
	-70.1127			-66.6919	-66.0515					-67.4386	-67.0202
	-70.1079			-66.6912	-66.0531					-67.4364	-67.0188
	-70.1033			-66.6902	-66.0553					-67.4336	-67.0168
	-70.0992			-66.6891	-66.0579					-67.4305	-67.0145
	-70.0959			-66.6879	-66.0605					-67.4274	-67.012
	-70.0936			-66.6868	-66.0629					-67.4246	-67.0098
	-70.0924			-66.6858	-66.0648					-67.4221	-67.0082
	-70.0923			-66.685	-66.0662					-67.4199	-67.0076
	-70.0933			-66.6846	-66.0669					-67.4182	-67.0081
	-70.0952			-66.6845	-66.0671					-67.4171	-67.0097
	-70.0977			-66.6847	-66.0667					-67.4166	-67.0122
	-70.1007			-66.6851	-66.0658					-67.4169	-67.0155
	-70.1037			-66.6857	-66.0646					-67.418	-67.0192
	-70.1065			-66.6863	-66.0631					-67.4197	-67.0228
	-70.1088			-66.6871	-66.0615					-67.4219	-67.0261
	-70.1102			-66.688	-66.0598					-67.4242	-67.0288
	-70.1108			-66.6891	-66.0581					-67.4264	-67.0307
	-70.1103			-66.6904	-66.0567					-67.4283	-67.0319
	-70.1089			-66.6918	-66.0556					-67.4296	-67.0326
	-70.1066			-66.6933	-66.0549					-67.4305	-67.0329
	-70.1037			-66.6948	-66.0546					-67.431	-67.0332
	-70.1005			-66.6962	-66.0547					-67.4312	-67.0334
	-70.097			-66.6973	-66.0551					-67.4312	-67.0335
	-70.0937			-66.6979	-66.0556					-67.4311	-67.0336
	-70.0907			-66.698	-66.0563					-67.4308	-67.0336
	-70.0882			-66.6977	-66.0569					-67.4305	-67.0337
	-70.0864			-66.697	-66.0576					-67.4301	-67.0338
	-70.0854			-66.6961	-66.0584					-67.4296	-67.0342
	-70.0852			-66.695	-66.0592					-67.429	-67.035
	-70.0859			-66.6939	-66.0601					-67.4283	-67.0362
	-70.0872			-66.6926	-66.061					-67.4275	-67.0377
	-70.0891			-66.6912	-66.0621					-67.4267	-67.0392
	-70.0914			-66.6896	-66.0632					-67.426	-67.0406
	-70.0938			-66.6877	-66.0644					-67.4258	-67.0417
	-70.0962			-66.6857	-66.0656					-67.426	-67.0423
	-70.0986			-66.6834	-66.0664					-67.4266	-67.0425
	-70.1008			-66.6813	-66.0666					-67.4274	-67.0424
	-70.1029			-66.6794	-66.066					-67.4282	-67.0422
	-70.1049			-66.6781	-66.0644					-67.4287	-67.0422
	-70.107			-66.6776	-66.0621					-67.429	-67.0426
	-70.1093			-66.6781	-66.0593					-67.4288	-67.0433
	-70.1119			-66.6796	-66.0566					-67.4283	-67.0442
	-70.1147			-66.6817	-66.0544					-67.4275	-67.0451
	-70.1178			-66.6841	-66.053					-67.4267	-67.0457
	-70.1211			-66.6863	-66.0524					-67.4258	-67.0457
	-70.1243			-66.688	-66.0527					-67.4249	-67.045
	-70.1274			-66.689	-66.0536					-67.4242	-67.0439
	-70.1301			-66.6894	-66.0547					-67.4238	-67.0423
	-70.1323			-66.6895	-66.0559					-67.4237	-67.0406
	-70.1339			-66.6894	-66.0569					-67.424	-67.039
	-70.1348			-66.6895	-66.0575					-67.4245	-67.0379
	-70.1351			-66.6898	-66.0579					-67.4251	-67.0373
	-70.1348			-66.6904	-66.058					-67.4254	-67.0375
	-70.1342			-66.6913	-66.0579					-67.425	-67.0382
	-70.1333			-66.6923	-66.0576					-67.4238	-67.0392
	-70.1323			-66.6931	-66.0571					-67.4218	-67.04
	-70.1315			-66.6937	-66.0565					-67.4191	-67.0401
	-70.1309			-66.6939	-66.0558					-67.4162	-67.0393
	-70.1306			-66.6935	-66.0551					-67.4136	-67.0374
	-70.1306			-66.6926	-66.0545					-67.4115	-67.035
	-70.1309			-66.6913	-66.0541					-67.4102	-67.0326
	-70.1315			-66.6898	-66.0542					-67.41	-67.0309
	-70.1324			-66.6883	-66.0547					-67.4107	-67.0303
	-70.1335			-66.687	-66.0556					-67.4123	-67.031
	-70.1349			-66.6859	-66.0568					-67.4145	-67.0329
	-70.1366			-66.685	-66.0581					-67.4168	-67.0354
	-70.1386			-66.6843	-66.0595					-67.4187	-67.0383
	-70.1409			-66.6837	-66.0608					-67.42	-67.0413
	-70.1434			-66.6831	-66.062					-67.4205	-67.0441
	-70.1462			-66.6826	-66.0629					-67.4201	-67.0468
	-70.1492			-66.6823	-66.0633					-67.4191	-67.0494
	-70.1521			-66.6821	-66.0634					-67.4176	-67.0518
	-70.1548			-66.6822	-66.0629					-67.4157	-67.054
	-70.1571			-66.6825	-66.0621					-67.4137	-67.0559
	-70.1589			-66.6831	-66.0609					-67.4117	-67.0571
	-70.16			-66.6837	-66.0594					-67.4098	-67.0575
	-70.1604			-66.6844	-66.058					-67.4081	-67.0571
	-70.16			-66.685	-66.0569					-67.4067	-67.0559
	-70.1589			-66.6855	-66.0561					-67.4055	-67.0542
	-70.1572			-66.6857	-66.0557					-67.4044	-67.0526
	-70.155			-66.6856	-66.0559					-67.4034	-67.0513
	-70.1525			-66.6852	-66.0566					-67.4024	-67.0506
	-70.1497			-66.6846	-66.0574					-67.4015	-67.0508
	-70.1468			-66.6839	-66.0583					-67.4008	-67.0515
	-70.1437			-66.6834	-66.059					-67.4003	-67.0526
	-70.1406			-66.6832	-66.0594					-67.4	-67.0537
	-70.1374			-66.6832	-66.0596					-67.3997	-67.0545
	-70.1341			-66.6834	-66.0593					-67.3994	-67.0547
	-70.1308			-66.6836	-66.0589					-67.399	-67.0541
	-70.1275			-66.6837	-66.0582					-67.3984	-67.0526
	-70.1244			-66.6837	-66.0575					-67.3977	-67.0503
	-70.1216			-66.6837	-66.0568					-67.397	-67.0474
	-70.1192			-66.684	-66.0562					-67.3964	-67.0441
	-70.1174			-66.6846	-66.0556					-67.3961	-67.0407
	-70.1162			-66.6857	-66.0551					-67.3961	-67.0377
	-70.1157			-66.687	-66.0545					-67.3965	-67.0352
	-70.1158			-66.6884	-66.0537					-67.3975	-67.0333
	-70.1164			-66.6897	-66.0527					-67.3988	-67.0322
	-70.1173			-66.6909	-66.0515					-67.4003	-67.0317
	-70.1182			-66.6918	-66.0502					-67.4018	-67.0318
	-70.1189			-66.6927	-66.0488					-67.4029	-67.0323
	-70.1193			-66.6935	-66.0477					-67.4037	-67.0332
	-70.1191			-66.6944	-66.0469					-67.4041	-67.0342
	-70.1185			-66.6951	-66.0465					-67.4041	-67.0352
	-70.1175			-66.6953	-66.0462					-67.4039	-67.036
	-70.1164			-66.6938	-66.0449					-67.4034	-67.0364
	-70.1155			-66.688	-66.0397					-67.4025	-67.0366
	-70.115			-66.6729	-66.0253					-67.4016	-67.0369
	-70.1153			-66.6398	-65.9925					-67.4013	-67.0383
	-70.1166			-66.5762	-65.928					-67.4034	-67.0425
	-70.1189			-66.4662	-65.8158					-67.4106	-67.0518
	-70.1222			-66.2952	-65.6414					-67.4263	-67.0695
	-70.1262			-66.0562	-65.398					-67.4547	-67.0989
	-70.1309			-65.7565	-65.0935					-67.4993	-67.1428
	-70.1358			-65.4222	-64.7547					-67.5625	-67.2029
	-70.1407			-65.0969	-64.4253					-67.6446	-67.2789
	-70.1454			-64.8345	-64.1586					-67.7433	-67.3688
	-70.1497			-64.6877	-64.0059					-67.8541	-67.4686
	-70.1535			-64.6964	-64.0057					-67.9704	-67.5727
	-70.1568			-64.8801	-64.1765					-68.0844	-67.6749
	-70.1596			-65.2352	-64.515					-68.1876	-67.7685
	-70.1618			-65.7363	-64.997					-68.2719	-67.8471
	-70.1635			-66.3401	-65.5816					-68.3303	-67.9051
	-70.1649			-66.9917	-66.2163					-68.358	-67.9381
	-70.166			-67.6313	-66.8434					-68.3528	-67.944
	-70.1667			-68.2024	-67.4081					-68.3158	-67.9227
	-70.1672			-68.6598	-67.8662					-68.2508	-67.8765
	-70.1673			-68.9747	-68.1896					-68.1641	-67.8096
	-70.1672			-69.1372	-68.3685					-68.0632	-67.7278
	-70.1666			-69.1543	-68.4096					-67.9563	-67.6378
	-70.1657			-69.0466	-68.3321					-67.8505	-67.5459
	-70.1643			-68.8425	-68.1629					-67.7523	-67.4581
	-70.1626			-68.575	-67.9325					-67.666	-67.3787
	-70.1606			-68.2768	-67.6711					-67.5945	-67.3106
	-70.1585			-67.9781	-67.4065					-67.5388	-67.2553
	-70.1565			-67.7032	-67.1608					-67.4983	-67.2126
	-70.1548			-67.4689	-66.9492					-67.4712	-67.1816
	-70.1538			-67.2833	-66.7794					-67.455	-67.1606
	-70.1535			-67.147	-66.6517					-67.4469	-67.1476
	-70.1541			-67.0546	-66.5615					-67.4444	-67.1407
	-70.1557			-66.9973	-66.5014					-67.4454	-67.1378
	-70.158			-66.9656	-66.4635					-67.4484	-67.1374
	-70.1609			-66.9508	-66.4405					-67.4524	-67.1382
	-70.1641			-66.9459	-66.4271					-67.4566	-67.1392
	-70.1672			-66.9463	-66.4193					-67.4608	-67.1399
	-70.1699			-66.9488	-66.4146					-67.4646	-67.1404
	-70.1721			-66.9517	-66.4113					-67.4679	-67.1408
	-70.1737			-66.954	-66.4086					-67.4705	-67.1413
	-70.1745			-66.9553	-66.4057					-67.4724	-67.1422
	-70.1749			-66.9555	-66.4022					-67.4736	-67.1437
	-70.1748			-66.9547	-66.3981					-67.4742	-67.1456
	-70.1744			-66.9531	-66.3932					-67.4746	-67.1479
	-70.1738			-66.9509	-66.3878					-67.475	-67.1502
	-70.173			-66.9484	-66.382					-67.4755	-67.1521
	-70.172			-66.9457	-66.3759					-67.4762	-67.1533
	-70.1707			-66.943	-66.3698					-67.477	-67.1536
	-70.169			-66.9403	-66.3638					-67.4777	-67.1529
	-70.1668			-66.9374	-66.3578					-67.478	-67.1513
	-70.1641			-66.9344	-66.352					-67.4775	-67.149
	-70.1609			-66.9311	-66.3465					-67.4764	-67.1466
	-70.1574			-66.9277	-66.3415					-67.4745	-67.1445
	-70.1536			-66.9242	-66.337					-67.4724	-67.1432
	-70.1499			-66.9207	-66.3333					-67.4703	-67.1431
	-70.1464			-66.9171	-66.3302					-67.4684	-67.1441
	-70.1432			-66.9136	-66.3278					-67.4669	-67.1462
	-70.1405			-66.9103	-66.3258					-67.4657	-67.149
	-70.1382			-66.9074	-66.3242					-67.4648	-67.152
	-70.1364			-66.9051	-66.3228					-67.464	-67.1549
	-70.135			-66.9035	-66.3215					-67.4633	-67.1574
	-70.134			-66.9026	-66.32					-67.4626	-67.1592
	-70.1331			-66.9022	-66.3184					-67.462	-67.1602
	-70.1324			-66.9021	-66.3166					-67.4614	-67.1603
	-70.1316			-66.9022	-66.3144					-67.4608	-67.1591
	-70.1306			-66.902	-66.312					-67.4601	-67.1564
	-70.1293			-66.9014	-66.3091					-67.4592	-67.1522
	-70.1276			-66.9002	-66.3059					-67.4582	-67.1464
	-70.1256			-66.8983	-66.3024					-67.4573	-67.1395
	-70.1233			-66.8956	-66.2987					-67.4566	-67.1322
	-70.1207			-66.8923	-66.2948					-67.4565	-67.125
	-70.1181			-66.8887	-66.291					-67.4569	-67.1188
	-70.1156			-66.8849	-66.2872					-67.4578	-67.1139
	-70.1134			-66.8812	-66.2834					-67.4589	-67.1105
	-70.1117			-66.8778	-66.2799					-67.4599	-67.1083
	-70.1105			-66.8748	-66.2764					-67.4603	-67.1071
	-70.1101			-66.8723	-66.2732					-67.4599	-67.1066
	-70.1104			-66.8704	-66.2701					-67.4586	-67.1066
	-70.1114			-66.869	-66.2672					-67.4563	-67.1068
	-70.113			-66.8682	-66.2645					-67.4533	-67.1071
	-70.1151			-66.868	-66.2619					-67.4499	-67.1072
	-70.1175			-66.8683	-66.2596					-67.4464	-67.1069
	-70.1201			-66.8689	-66.2574					-67.443	-67.1061
	-70.1228			-66.8696	-66.2555					-67.4398	-67.1047
	-70.1255			-66.8702	-66.254					-67.437	-67.1029
	-70.1281			-66.8703	-66.2529					-67.4347	-67.1008
	-70.1305			-66.8697	-66.2523					-67.4328	-67.0988
	-70.1327			-66.8681	-66.2522					-67.4315	-67.097
	-70.1349			-66.8656	-66.2526					-67.4306	-67.0956
	-70.1369			-66.8624	-66.2531					-67.4301	-67.0948
	-70.1388			-66.8588	-66.2535					-67.4299	-67.0943
	-70.1406			-66.855	-66.2536					-67.4299	-67.0943
	-70.1423			-66.8512	-66.2534					-67.4297	-67.0945
	-70.144			-66.8473	-66.2528					-67.4294	-67.0949
	-70.1457			-66.8433	-66.252					-67.4287	-67.0953
	-70.1473			-66.8391	-66.2509					-67.4276	-67.0957
	-70.1489			-66.835	-66.2497					-67.4261	-67.0961
	-70.1505			-66.8312	-66.2482					-67.4244	-67.0965
	-70.1521			-66.828	-66.2463					-67.4227	-67.097
	-70.1537			-66.826	-66.2442					-67.421	-67.0977
	-70.1552			-66.825	-66.2417					-67.4196	-67.0989
	-70.1564			-66.8249	-66.2391					-67.4185	-67.1004
	-70.1573			-66.8255	-66.2365					-67.4175	-67.1023
	-70.1578			-66.8263	-66.234					-67.4167	-67.1041
	-70.1577			-66.8269	-66.2317					-67.4159	-67.1055
	-70.157			-66.8273	-66.2297					-67.415	-67.1062
	-70.1558			-66.8273	-66.228					-67.414	-67.1059
	-70.154			-66.8271	-66.2264					-67.4127	-67.1044
	-70.1519			-66.8269	-66.225					-67.4113	-67.102
	-70.1494			-66.8267	-66.2235					-67.4098	-67.0989
	-70.1469			-66.8266	-66.2218					-67.4083	-67.0956
	-70.1443			-66.8264	-66.2198					-67.407	-67.0924
	-70.1419			-66.8261	-66.2175					-67.406	-67.0895
	-70.1397			-66.8257	-66.215					-67.4053	-67.0868
	-70.1379			-66.8251	-66.2124					-67.405	-67.084
	-70.1365			-66.8245	-66.2098					-67.405	-67.0809
	-70.1356			-66.824	-66.2075					-67.4051	-67.0774
	-70.1351			-66.8235	-66.2055					-67.4051	-67.0733
	-70.1352			-66.8232	-66.204					-67.4048	-67.0689
	-70.1358			-66.8228	-66.2029					-67.4038	-67.0645
	-70.1368			-66.8222	-66.2024					-67.4021	-67.0605
	-70.1381			-66.8213	-66.2022					-67.3997	-67.0572
	-70.1396			-66.8201	-66.2021					-67.3968	-67.0551
	-70.1412			-66.8188	-66.202					-67.3939	-67.054
	-70.1427			-66.8172	-66.2015					-67.3913	-67.0539
	-70.1442			-66.8157	-66.2005					-67.3894	-67.0544
	-70.1454			-66.8142	-66.199					-67.3883	-67.055
	-70.1465			-66.8131	-66.1969					-67.388	-67.0553
	-70.1474			-66.8124	-66.1946					-67.3884	-67.055
	-70.1482			-66.8123	-66.1922					-67.3892	-67.0541
	-70.149			-66.8129	-66.19					-67.3901	-67.0526
	-70.1499			-66.8138	-66.1881					-67.3908	-67.0507
	-70.1507			-66.8149	-66.1866					-67.3913	-67.0487
	-70.1517			-66.8157	-66.1857					-67.3913	-67.0468
	-70.1526			-66.8158	-66.1851					-67.391	-67.0452
	-70.1536			-66.815	-66.185					-67.3902	-67.0437
	-70.1546			-66.8133	-66.1851					-67.3892	-67.0422
	-70.1555			-66.8109	-66.1853					-67.3881	-67.0405
	-70.1563			-66.8081	-66.1854					-67.3869	-67.0386
	-70.157			-66.8053	-66.1852					-67.3859	-67.0367
	-70.1577			-66.8027	-66.1847					-67.3851	-67.035
	-70.1583			-66.8005	-66.1836					-67.3844	-67.0336
	-70.159			-66.7989	-66.182					-67.3837	-67.0326
	-70.1598			-66.7978	-66.1799					-67.3827	-67.032
	-70.1606			-66.7971	-66.1774					-67.3812	-67.0317
	-70.1616			-66.7965	-66.1746					-67.3791	-67.0314
	-70.1626			-66.796	-66.1718					-67.3763	-67.0309
	-70.1637			-66.7952	-66.169					-67.3727	-67.0302
	-70.1648			-66.7943	-66.1663					-67.3686	-67.0293
	-70.1659			-66.7934	-66.1639					-67.3642	-67.0278
	-70.1669			-66.7925	-66.1616					-67.36	-67.0258
	-70.1679			-66.7918	-66.1593					-67.3564	-67.0228
	-70.1689			-66.7915	-66.157					-67.3538	-67.0185
	-70.17			-66.7916	-66.1546					-67.3524	-67.0128
	-70.171			-66.7919	-66.1523					-67.3524	-67.006
	-70.172			-66.7924	-66.15					-67.3534	-66.9985
	-70.1729			-66.7928	-66.148					-67.3551	-66.9913
	-70.1736			-66.7932	-66.1463					-67.357	-66.9853
	-70.174			-66.7933	-66.1449					-67.3589	-66.981
	-70.1741			-66.7931	-66.1437					-67.3605	-66.9784
	-70.1738			-66.7926	-66.1424					-67.3618	-66.9773
	-70.1732			-66.7917	-66.1407					-67.3626	-66.9769
	-70.1723			-66.7906	-66.1385					-67.3631	-66.9766
	-70.1712			-66.7894	-66.1357					-67.3632	-66.9759
	-70.1698			-66.788	-66.1326					-67.3628	-66.9747
	-70.1684			-66.7865	-66.1293					-67.3619	-66.9732
	-70.1669			-66.7849	-66.126					-67.3605	-66.9716
	-70.1654			-66.7831	-66.123					-67.3588	-66.9703
	-70.1639			-66.7812	-66.12					-67.3569	-66.9693
	-70.1626			-66.779	-66.1171					-67.3552	-66.9686
	-70.1615			-66.7765	-66.1142					-67.3539	-66.968
	-70.1608			-66.7738	-66.1111					-67.3533	-66.9669
	-70.1604			-66.7708	-66.108					-67.3532	-66.9651
	-70.1606			-66.7674	-66.105					-67.3535	-66.9623
	-70.1614			-66.7639	-66.1023					-67.3539	-66.9584
	-70.1628			-66.7602	-66.1					-67.354	-66.9535
	-70.1647			-66.7566	-66.0981					-67.3537	-66.9482
	-70.1671			-66.7532	-66.0967					-67.3526	-66.9429
	-70.1699			-66.7503	-66.0957					-67.3508	-66.938
	-70.1728			-66.7478	-66.0949					-67.3483	-66.9339
	-70.1758			-66.7458	-66.0941					-67.3453	-66.9304
	-70.1786			-66.7444	-66.0932					-67.3419	-66.9275
	-70.181			-66.7433	-66.0919					-67.3382	-66.9249
	-70.1829			-66.7426	-66.0903					-67.3343	-66.9223
	-70.1842			-66.7421	-66.0883					-67.3302	-66.9197
	-70.1847			-66.7419	-66.086					-67.3259	-66.9168
	-70.1845			-66.7419	-66.0835					-67.3213	-66.9139
	-70.1836			-66.7418	-66.081					-67.3164	-66.911
	-70.182			-66.7416	-66.0784					-67.3115	-66.9083
	-70.1798			-66.7411	-66.076					-67.3066	-66.9057
	-70.1771			-66.7403	-66.0738					-67.3019	-66.9035
	-70.174			-66.739	-66.0719					-67.2975	-66.9014
	-70.1706			-66.7373	-66.0701					-67.2935	-66.8995
	-70.1671			-66.7351	-66.0684					-67.29	-66.8976
	-70.1635			-66.7325	-66.0668					-67.2866	-66.8954
	-70.16			-66.7297	-66.0649					-67.2833	-66.8927
	-70.1566			-66.7266	-66.0628					-67.2796	-66.8893
	-70.1535			-66.7236	-66.0603					-67.2754	-66.8852
	-70.1507			-66.7209	-66.0574					-67.2707	-66.8801
	-70.1482			-66.7185	-66.0541					-67.2654	-66.8742
	-70.1459			-66.7164	-66.0506					-67.2598	-66.8674
	-70.1438			-66.7147	-66.0468					-67.2543	-66.8599
	-70.1416			-66.7132	-66.0429					-67.249	-66.852
	-70.1394			-66.712	-66.0389					-67.2442	-66.8438
	-70.137			-66.7111	-66.0347					-67.2403	-66.8357
	-70.1345			-66.7104	-66.0305					-67.2374	-66.828
	-70.1318			-66.71	-66.0263					-67.2356	-66.8209
	-70.1292			-66.7098	-66.0223					-67.2348	-66.8147
	-70.1267			-66.7096	-66.0188					-67.2349	-66.8093
	-70.1245			-66.7093	-66.0157					-67.2356	-66.8046
	-70.1227			-66.7087	-66.0129					-67.2367	-66.8006
	-70.1215			-66.7077	-66.0103					-67.2378	-66.797
	-70.1207			-66.7062	-66.0077					-67.2387	-66.7934
	-70.1205			-66.704	-66.0048					-67.2395	-66.7899
	-70.1207			-66.7012	-66.0017					-67.2401	-66.7864
	-70.1213			-66.6977	-65.9984					-67.2404	-66.7828
	-70.1222			-66.6936	-65.995					-67.2404	-66.779
	-70.1233			-66.6892	-65.9917					-67.2398	-66.7749
	-70.1246			-66.6846	-65.9886					-67.2384	-66.7706
	-70.1262			-66.6802	-65.9858					-67.2362	-66.7659
	-70.1279			-66.6762	-65.9833					-67.233	-66.7608
	-70.1299			-66.6728	-65.981					-67.2289	-66.7552
	-70.132			-66.67	-65.9788					-67.2242	-66.7492
	-70.1341			-66.6676	-65.9764					-67.2189	-66.7429
	-70.1362			-66.6655	-65.9737					-67.2135	-66.7362
	-70.138			-66.6634	-65.9703					-67.2081	-66.7293
	-70.1394			-66.6613	-65.9661					-67.2028	-66.7223
	-70.1404			-66.6592	-65.961					-67.1976	-66.7154
	-70.1407			-66.6572	-65.9552					-67.1924	-66.7084
	-70.1405			-66.6553	-65.9489					-67.1869	-66.7014
	-70.1397			-66.6535	-65.9426					-67.1811	-66.6941
	-70.1383			-66.6517	-65.9365					-67.175	-66.6864
	-70.1364			-66.6496	-65.931					-67.169	-66.6783
	-70.1342			-66.6469	-65.9261					-67.1632	-66.6699
	-70.1317			-66.6437	-65.9219					-67.1577	-66.6615
	-70.1289			-66.6398	-65.9182					-67.1527	-66.6534
	-70.126			-66.6354	-65.9148					-67.1478	-66.646
	-70.123			-66.6308	-65.9117					-67.143	-66.6396
	-70.12			-66.626	-65.9084					-67.138	-66.6342
	-70.1172			-66.6213	-65.9049					-67.1328	-66.6296
	-70.1148			-66.6168	-65.901					-67.1273	-66.6255
	-70.1129			-66.6125	-65.8968					-67.1216	-66.6216
	-70.1118			-66.6082	-65.8922					-67.116	-66.6178
	-70.1118			-66.604	-65.8875					-67.1105	-66.614
	-70.1128			-66.5997	-65.8826					-67.105	-66.6098
	-70.1151			-66.5955	-65.8778					-67.0994	-66.6052
	-70.1184			-66.5914	-65.873					-67.0936	-66.5998
	-70.1227			-66.5875	-65.8683					-67.0876	-66.5935
	-70.1277			-66.5842	-65.8636					-67.0814	-66.5863
	-70.1331			-66.5815	-65.8588					-67.0752	-66.5781
	-70.1388			-66.5795	-65.8538					-67.0693	-66.5694
	-70.1443			-66.578	-65.8485					-67.0637	-66.5604
	-70.1496			-66.5768	-65.8428					-67.0583	-66.5512
	-70.1545			-66.5758	-65.8368					-67.0528	-66.5421
	-70.1589			-66.5745	-65.8305					-67.0467	-66.5332
	-70.1627			-66.5729	-65.8241					-67.0399	-66.5244
	-70.166			-66.5708	-65.8177					-67.0321	-66.5159
	-70.1687			-66.5683	-65.8114					-67.0237	-66.5075
	-70.1709			-66.5653	-65.8051					-67.015	-66.4991
	-70.1724			-66.5618	-65.799					-67.0064	-66.4908
	-70.1733			-66.5578	-65.793					-66.9984	-66.4825
	-70.1736			-66.553	-65.7871					-66.9914	-66.4742
	-70.1733			-66.5478	-65.7814					-66.9854	-66.4657
	-70.1725			-66.5421	-65.7759					-66.9803	-66.4571
	-70.1713			-66.5363	-65.7704					-66.9758	-66.4483
	-70.1698			-66.5306	-65.7651					-66.9715	-66.4393
	-70.1681			-66.5251	-65.7597					-66.9669	-66.4302
	-70.1664			-66.52	-65.7541					-66.9616	-66.4211
	-70.1649			-66.5152	-65.7484					-66.9554	-66.412
	-70.1636			-66.5105	-65.7425					-66.9482	-66.4031
	-70.1625			-66.5059	-65.7367					-66.9402	-66.3944
	-70.1619			-66.5013	-65.7309					-66.9318	-66.386
	-70.1615			-66.4967	-65.7252					-66.9236	-66.3778
	-70.1616			-66.4921	-65.7196					-66.9156	-66.3699
	-70.1619			-66.4876	-65.714					-66.9083	-66.3621
	-70.1624			-66.483	-65.7081					-66.9016	-66.3545
	-70.1631			-66.4782	-65.702					-66.8952	-66.347
	-70.1638			-66.4732	-65.6957					-66.8889	-66.3395
	-70.1646			-66.4679	-65.689					-66.8824	-66.3319
	-70.1652			-66.4623	-65.682					-66.8756	-66.3242
	-70.1657			-66.4566	-65.6747					-66.8683	-66.3163
	-70.166			-66.4508	-65.667					-66.8607	-66.3084
	-70.166			-66.445	-65.6589					-66.8532	-66.3005
	-70.1659			-66.4394	-65.6506					-66.8459	-66.2925
	-70.1655			-66.4341	-65.642					-66.839	-66.2844
	-70.1651			-66.4289	-65.6334					-66.8327	-66.2762
	-70.1647			-66.4238	-65.6249					-66.8267	-66.2679
	-70.1644			-66.4188	-65.6165					-66.8209	-66.2596
	-70.1643			-66.4138	-65.6082					-66.8148	-66.2514
	-70.1645			-66.4089	-65.6003					-66.8083	-66.2434
	-70.165			-66.404	-65.5926					-66.8012	-66.2357
	-70.1658			-66.3993	-65.5855					-66.7936	-66.2283
	-70.167			-66.3947	-65.5788					-66.7856	-66.221
	-70.1685			-66.3903	-65.5725					-66.7776	-66.2133
	-70.1704			-66.386	-65.5665					-66.7696	-66.2047
	-70.1726			-66.3816	-65.5605					-66.7619	-66.1951
	-70.1752			-66.3771	-65.5545					-66.7545	-66.1842
	-70.1782			-66.3724	-65.5481					-66.7472	-66.1723
	-70.1814			-66.3675	-65.5415					-66.7397	-66.1601
	-70.1848			-66.3623	-65.5346					-66.7318	-66.1482
	-70.1884			-66.3569	-65.5275					-66.7234	-66.1372
	-70.1921			-66.3513	-65.5204					-66.7145	-66.1274
	-70.1957			-66.3455	-65.513					-66.7051	-66.1189
	-70.1991			-66.3397	-65.5055					-66.6955	-66.1117
	-70.2023			-66.3339	-65.4976					-66.686	-66.1054
	-70.205			-66.3285	-65.4895					-66.6768	-66.0996
	-70.2072			-66.3234	-65.4811					-66.6681	-66.094
	-70.2089			-66.3187	-65.4727					-66.66	-66.088
	-70.21			-66.3142	-65.4645					-66.6525	-66.0814
	-70.2104			-66.3098	-65.4566					-66.6453	-66.0738
	-70.2103			-66.3052	-65.4491					-66.6379	-66.0651
	-70.2098			-66.3001	-65.442					-66.6301	-66.0554
	-70.2088			-66.2944	-65.4349					-66.6216	-66.0451
	-70.2077			-66.2881	-65.4276					-66.6126	-66.0346
	-70.2064			-66.2814	-65.42					-66.6033	-66.0245
	-70.2052			-66.2747	-65.412					-66.594	-66.0151
	-70.2041			-66.2682	-65.4036					-66.5852	-66.0064
	-70.2032			-66.2623	-65.3951					-66.5767	-65.9982
	-70.2027			-66.2572	-65.3865					-66.5685	-65.9901
	-70.2024			-66.2529	-65.3781					-66.5603	-65.9816
	-70.2025			-66.2489	-65.3699					-66.5517	-65.9724
	-70.2028			-66.2452	-65.3619					-66.5428	-65.9625
	-70.2033			-66.2412	-65.354					-66.5335	-65.952
	-70.204			-66.2367	-65.3461					-66.5242	-65.9412
	-70.2049			-66.2318	-65.338					-66.5152	-65.9306
	-70.2059			-66.2263	-65.3297					-66.5069	-65.9206
	-70.2072			-66.2205	-65.3212					-66.4991	-65.9116
	-70.2085			-66.2145	-65.3126					-66.4919	-65.9036
	-70.2102			-66.2084	-65.3039					-66.485	-65.8965
	-70.212			-66.2021	-65.2953					-66.4783	-65.89
	-70.2141			-66.1956	-65.2869					-66.4717	-65.8835
	-70.2164			-66.1887	-65.2787					-66.4655	-65.8765
	-70.219			-66.1815	-65.2706					-66.4596	-65.8685
	-70.2217			-66.174	-65.2625					-66.4541	-65.8592
	-70.2246			-66.1666	-65.2542					-66.4488	-65.8486
	-70.2274			-66.1596	-65.2456					-66.4434	-65.8372
	-70.2301			-66.1534	-65.2366					-66.4376	-65.8253
	-70.2326			-66.148	-65.2274					-66.431	-65.8137
	-70.2347			-66.1435	-65.218					-66.4237	-65.8028
	-70.2362			-66.1395	-65.2085					-66.4157	-65.793
	-70.2372			-66.1358	-65.1991					-66.4073	-65.7843
	-70.2374			-66.1319	-65.1898					-66.3986	-65.7766
	-70.2367			-66.1276	-65.1808					-66.3899	-65.7697
	-70.2351			-66.1228	-65.1722					-66.3814	-65.7631
	-70.2325			-66.1172	-65.1642					-66.373	-65.7566
	-70.2288			-66.111	-65.1567					-66.3649	-65.7497
	-70.224			-66.1043	-65.1495					-66.3569	-65.7425
	-70.2183			-66.0972	-65.1423					-66.3488	-65.7348
	-70.2119			-66.0902	-65.1349					-66.3403	-65.7267
	-70.2051			-66.0835	-65.1269					-66.3314	-65.7185
	-70.1983			-66.0771	-65.1183					-66.322	-65.7102
	-70.1921			-66.0713	-65.1093					-66.3123	-65.7017
	-70.1869			-66.0659	-65.1001					-66.3025	-65.6927
	-70.1832			-66.0608	-65.0909					-66.293	-65.6832
	-70.1812			-66.056	-65.082					-66.284	-65.6728
	-70.1811			-66.0512	-65.0733					-66.2757	-65.6616
	-70.1827			-66.0464	-65.0648					-66.268	-65.6498
	-70.1858			-66.0414	-65.0564					-66.2608	-65.638
	-70.1899			-66.0362	-65.048					-66.2539	-65.6266
	-70.1944			-66.0306	-65.0397					-66.2472	-65.616
	-70.1988			-66.0246	-65.0314					-66.2405	-65.6064
	-70.2026			-66.0182	-65.0231					-66.2339	-65.5978
	-70.2054			-66.0115	-65.0148					-66.2272	-65.5901
	-70.2071			-66.0048	-65.0066					-66.2206	-65.583
	-70.2077			-65.9982	-64.9984					-66.2142	-65.5763
	-70.2072			-65.9919	-64.99					-66.2081	-65.5696
	-70.206			-65.9862	-64.9814					-66.202	-65.5628
	-70.2044			-65.9809	-64.9727					-66.1961	-65.5555
	-70.2026			-65.976	-64.9638					-66.1901	-65.5477
	-70.201			-65.9712	-64.9549					-66.1841	-65.5393
	-70.1998			-65.9664	-64.9459					-66.1781	-65.5303
	-70.1991			-65.9615	-64.9369					-66.1722	-65.5208
	-70.1991			-65.9563	-64.9281					-66.1664	-65.511
	-70.1998			-65.9509	-64.9193					-66.1608	-65.5009
	-70.201			-65.9455	-64.9105					-66.1553	-65.4909
	-70.2025			-65.9399	-64.9017					-66.1497	-65.4812
	-70.2043			-65.9342	-64.8928					-66.1437	-65.4719
	-70.206			-65.9284	-64.8839					-66.1371	-65.463
	-70.2074			-65.9222	-64.8749					-66.1299	-65.4544
	-70.2085			-65.9157	-64.8658					-66.1219	-65.4461
	-70.209			-65.9088	-64.8566					-66.1132	-65.4378
	-70.209			-65.9016	-64.8472					-66.104	-65.4293
	-70.2086			-65.8942	-64.8377					-66.0944	-65.4204
	-70.2079			-65.8867	-64.828					-66.0847	-65.4113
	-70.2074			-65.8792	-64.8182					-66.0751	-65.4019
	-70.2072			-65.872	-64.8085					-66.0656	-65.3925
	-70.2077			-65.8652	-64.7989					-66.0564	-65.3831
	-70.2092			-65.8589	-64.7894					-66.0477	-65.3739
	-70.212			-65.8531	-64.7798					-66.0396	-65.3649
	-70.2159			-65.8478	-64.7701					-66.0321	-65.3562
	-70.221			-65.843	-64.76					-66.0256	-65.3477
	-70.227			-65.8386	-64.7496					-66.02	-65.3397
	-70.2334			-65.8346	-64.7391					-66.0154	-65.332
	-70.2398			-65.8308	-64.7287					-66.0115	-65.3249
	-70.2458			-65.8272	-64.7185					-66.0079	-65.3181
	-70.2507			-65.8235	-64.7088					-66.0042	-65.3117
	-70.2543			-65.8195	-64.6996					-65.9998	-65.3053
	-70.2564			-65.8148	-64.6908					-65.9945	-65.2987
	-70.2569			-65.8094	-64.6822					-65.9883	-65.2916
	-70.2561			-65.8032	-64.6737					-65.9815	-65.2838
	-70.2542			-65.7963	-64.6651					-65.9742	-65.2752
	-70.2516			-65.789	-64.6564					-65.9666	-65.2658
	-70.2487			-65.7815	-64.6473					-65.9588	-65.2559
	-70.2462			-65.7743	-64.638					-65.9504	-65.2458
	-70.2441			-65.7675	-64.6284					-65.9414	-65.2357
	-70.243			-65.7613	-64.6188					-65.9318	-65.2258
	-70.2427			-65.7558	-64.6092					-65.9217	-65.2164
	-70.2432			-65.7508	-64.6					-65.9116	-65.2074
	-70.2445			-65.7462	-64.5912					-65.9018	-65.1988
	-70.2462			-65.7417	-64.5829					-65.8927	-65.1905
	-70.248			-65.7367	-64.575					-65.8844	-65.1824
	-70.2496			-65.7311	-64.5675					-65.8767	-65.1746
	-70.2508			-65.7245	-64.5602					-65.8694	-65.1671
	-70.2515			-65.717	-64.553					-65.8622	-65.1598
	-70.2515			-65.7089	-64.5458					-65.8547	-65.1528
	-70.251			-65.7005	-64.5385					-65.8467	-65.146
	-70.25			-65.6923	-64.531					-65.8382	-65.1394
	-70.2487			-65.6845	-64.5233					-65.8293	-65.1324
	-70.2473			-65.6773	-64.5155					-65.8202	-65.125
	-70.246			-65.6709	-64.5075					-65.8112	-65.117
	-70.2451			-65.665	-64.4993					-65.8024	-65.1083
	-70.2446			-65.6593	-64.4908					-65.794	-65.0992
	-70.2445			-65.6537	-64.4819					-65.7859	-65.0901
	-70.2449			-65.6476	-64.4725					-65.7779	-65.0811
	-70.2457			-65.6409	-64.4626					-65.7699	-65.0724
	-70.2466			-65.6334	-64.4524					-65.7619	-65.0641
	-70.2475			-65.6255	-64.4419					-65.754	-65.056
	-70.2482			-65.6173	-64.4313					-65.7464	-65.048
	-70.2487			-65.6095	-64.4206					-65.7393	-65.0401
	-70.2486			-65.6025	-64.4097					-65.7328	-65.0324
	-70.2479			-65.5966	-64.3988					-65.7271	-65.0247
	-70.2467			-65.5921	-64.388					-65.7218	-65.0171
	-70.2448			-65.5888	-64.3775					-65.7168	-65.0094
	-70.2423			-65.5864	-64.3673					-65.7118	-65.0014
	-70.2393			-65.5843	-64.3576					-65.7069	-64.9929
	-70.2358			-65.5819	-64.3483					-65.7017	-64.984
	-70.2319			-65.5788	-64.3392					-65.6962	-64.9748
	-70.2279			-65.5745	-64.3301					-65.6901	-64.9655
	-70.2239			-65.569	-64.3212					-65.6834	-64.9561
	-70.2202			-65.5625	-64.3123					-65.6759	-64.9469
	-70.2169			-65.5552	-64.3036					-65.6677	-64.9379
	-70.2142			-65.5475	-64.2953					-65.6592	-64.9291
	-70.2123			-65.54	-64.2871					-65.6506	-64.9206
	-70.2113			-65.5327	-64.2789					-65.6423	-64.9127
	-70.211			-65.5259	-64.2703					-65.6345	-64.9054
	-70.2115			-65.5196	-64.2611					-65.6273	-64.8988
	-70.2126			-65.5138	-64.2512					-65.6206	-64.8926
	-70.2142			-65.5082	-64.2407					-65.6142	-64.8866
	-70.2161			-65.5027	-64.2301					-65.6076	-64.8802
	-70.2182			-65.4972	-64.2196					-65.6008	-64.873
	-70.2205			-65.4917	-64.2099					-65.5936	-64.8648
	-70.2228			-65.486	-64.2009					-65.5861	-64.8557
	-70.2253			-65.4803	-64.1927					-65.5783	-64.846
	-70.2277			-65.4744	-64.185					-65.5704	-64.8362
	-70.2302			-65.4687	-64.1774					-65.5623	-64.827
	-70.2326			-65.463	-64.1695					-65.5543	-64.8187
	-70.2348			-65.4574	-64.1613					-65.5461	-64.8115
	-70.2367			-65.4518	-64.1525					-65.5378	-64.8053
	-70.2381			-65.4462	-64.1434					-65.5294	-64.7997
	-70.239			-65.4403	-64.1341					-65.5209	-64.7944
	-70.2391			-65.4343	-64.1249					-65.5126	-64.789
	-70.2384			-65.4281	-64.1159					-65.5044	-64.7834
	-70.2371			-65.422	-64.1073					-65.4965	-64.7774
	-70.2352			-65.4162	-64.0992					-65.4887	-64.7711
	-70.2328			-65.4107	-64.0913					-65.481	-64.7647
	-70.2303			-65.4057	-64.0834					-65.4733	-64.7583
	-70.2278			-65.4011	-64.0754					-65.4656	-64.752
	-70.2255			-65.3966	-64.0671					-65.4582	-64.7458
	-70.2237			-65.392	-64.0582					-65.4514	-64.7395
	-70.2223			-65.3872	-64.0488					-65.4453	-64.7329
	-70.2214			-65.3821	-64.0389					-65.4398	-64.7258
	-70.2208			-65.3765	-64.0284					-65.435	-64.718
	-70.2204			-65.3705	-64.0177					-65.4303	-64.7098
	-70.2202			-65.3642	-64.0067					-65.4257	-64.7016
	-70.2199			-65.3577	-63.9959					-65.4207	-64.6937
	-70.2194			-65.3509	-63.9854					-65.4153	-64.6865
	-70.2188			-65.3438	-63.9755					-65.4096	-64.6801
	-70.2181			-65.3366	-63.9661					-65.4036	-64.6741
	-70.2173			-65.3293	-63.9575					-65.3973	-64.6682
	-70.2167			-65.3221	-63.9496					-65.3906	-64.6618
	-70.2162			-65.3154	-63.9423					-65.3836	-64.6547
	-70.2159			-65.3091	-63.9356					-65.3763	-64.647
	-70.2159			-65.3035	-63.9291					-65.3685	-64.6389
	-70.2162			-65.2985	-63.9227					-65.3607	-64.6309
	-70.2165			-65.294	-63.9159					-65.353	-64.6232
	-70.2169			-65.2898	-63.9086					-65.3456	-64.616
	-70.2172			-65.2856	-63.9006					-65.3389	-64.6094
	-70.2172			-65.2811	-63.8917					-65.3327	-64.6032
	-70.2166			-65.2762	-63.8822					-65.3269	-64.5973
	-70.215			-65.2707	-63.8723					-65.3212	-64.5917
	-70.2116			-65.2645	-63.8622					-65.3156	-64.5863
	-70.2055			-65.2579	-63.8523					-65.3098	-64.5813
	-70.1952			-65.2508	-63.843					-65.3038	-64.5767
	-70.1787			-65.2435	-63.8343					-65.2978	-64.5726
	-70.154			-65.2363	-63.8263					-65.2919	-64.5687
	-70.1185			-65.2293	-63.819					-65.2861	-64.5648
	-70.0701			-65.2228	-63.812					-65.2806	-64.5607
	-70.0072			-65.2168	-63.805					-65.2751	-64.5561
	-69.9296			-65.2113	-63.7976					-65.2697	-64.5511
	-69.839			-65.2062	-63.7896					-65.2641	-64.5458
	-69.7393			-65.2016	-63.781					-65.2583	-64.5403
	-69.637			-65.1973	-63.772					-65.2522	-64.535
	-69.541			-65.1932	-63.7629					-65.2459	-64.5299
	-69.4621			-65.1891	-63.7539					-65.2394	-64.5252
	-69.412			-65.1846	-63.745					-65.2331	-64.5207
	-69.4017			-65.1797	-63.7362					-65.2271	-64.5163
	-69.4407			-65.1742	-63.7275					-65.2215	-64.5118
	-69.5346			-65.1684	-63.7191					-65.2164	-64.507
	-69.685			-65.1624	-63.711					-65.2114	-64.5019
	-69.8878			-65.1565	-63.7034					-65.2065	-64.4964
	-70.1341			-65.151	-63.6963					-65.2013	-64.4907
	-70.4098			-65.1459	-63.6895					-65.1958	-64.4852
	-70.6977			-65.1411	-63.6827					-65.1897	-64.4799
	-70.9787			-65.1365	-63.6755					-65.1829	-64.4749
	-71.2339			-65.1319	-63.6677					-65.1755	-64.4702
	-71.4467			-65.1272	-63.6593					-65.1675	-64.4653
	-71.6041			-65.1223	-63.6504					-65.1592	-64.4601
	-71.6985			-65.1174	-63.6412					-65.151	-64.4542
	-71.7277			-65.1125	-63.6321					-65.1434	-64.4473
	-71.6951			-65.1076	-63.6231					-65.1369	-64.4397
	-71.6087			-65.1027	-63.6145					-65.1317	-64.4315
	-71.4802			-65.0977	-63.6062					-65.1277	-64.4232
	-71.3232			-65.0924	-63.598					-65.1247	-64.4154
	-71.1517			-65.0867	-63.59					-65.1222	-64.4082
	-70.979			-65.0807	-63.5819					-65.1196	-64.4016
	-70.8162			-65.0744	-63.5737					-65.1164	-64.3954
	-70.6718			-65.068	-63.5653					-65.1125	-64.3893
	-70.5513			-65.062	-63.5568					-65.1075	-64.383
	-70.4571			-65.0567	-63.5482					-65.1016	-64.3761
	-70.3892			-65.0521	-63.5394					-65.095	-64.3687
	-70.3453			-65.0482	-63.5306					-65.088	-64.3609
	-70.322			-65.0448	-63.5217					-65.081	-64.3529
	-70.3151			-65.0414	-63.5127					-65.0742	-64.3448
	-70.3201			-65.0378	-63.5036					-65.0679	-64.3369
	-70.3329			-65.0338	-63.4946					-65.0624	-64.3291
	-70.3501			-65.0291	-63.4859					-65.0576	-64.3214
	-70.3689			-65.0238	-63.4776					-65.0537	-64.3138
	-70.3874			-65.0182	-63.4698					-65.0506	-64.3061
	-70.4041			-65.0125	-63.4628					-65.0479	-64.2983
	-70.4185			-65.0067	-63.4563					-65.0456	-64.2905
	-70.4303			-65.0011	-63.4501					-65.0432	-64.2828
	-70.4397			-64.9955	-63.4437					-65.0405	-64.2753
	-70.4469			-64.9899	-63.437					-65.0374	-64.2682
	-70.4525			-64.9841	-63.4294					-65.0337	-64.2618
	-70.4568			-64.9781	-63.421					-65.0293	-64.2563
	-70.4603			-64.9716	-63.4118					-65.0244	-64.2519
	-70.4631			-64.9649	-63.402					-65.0192	-64.2484
	-70.4655			-64.9578	-63.3921					-65.014	-64.2454
	-70.4675			-64.9506	-63.3822					-65.0092	-64.2427
	-70.4691			-64.9434	-63.3728					-65.0051	-64.2398
	-70.4701			-64.936	-63.3639					-65.0018	-64.2366
	-70.4704			-64.9287	-63.3558					-64.9991	-64.2333
	-70.4699			-64.9215	-63.3483					-64.9967	-64.2298
	-70.4686			-64.9145	-63.3415					-64.994	-64.2264
	-70.4664			-64.9077	-63.3352					-64.9906	-64.223
	-70.4633			-64.9014	-63.3293					-64.9861	-64.2195
	-70.4595			-64.8955	-63.3235					-64.9807	-64.2157
	-70.4552			-64.89	-63.3177					-64.9746	-64.2114
	-70.4505			-64.8849	-63.3116					-64.968	-64.2065
	-70.4457			-64.8801	-63.3052					-64.9613	-64.201
	-70.4408			-64.8755	-63.2985					-64.9547	-64.1954
	-70.4362			-64.8712	-63.2913					-64.9485	-64.1897
	-70.432			-64.8672	-63.2838					-64.9427	-64.1845
	-70.4281			-64.8638	-63.276					-64.9376	-64.1799
	-70.4247			-64.8608	-63.2679					-64.933	-64.176
	-70.4216			-64.8582	-63.2596					-64.929	-64.1728
	-70.4188			-64.8557	-63.2511					-64.9251	-64.1702
	-70.4162			-64.853	-63.2426					-64.921	-64.1679
	-70.4137			-64.8496	-63.234					-64.9164	-64.1657
	-70.4112			-64.8455	-63.2254					-64.9111	-64.1632
	-70.4088			-64.8407	-63.217					-64.905	-64.1604
	-70.4064			-64.8354	-63.2087					-64.8984	-64.1572
	-70.4041			-64.8301	-63.2008					-64.8916	-64.1534
	-70.4021			-64.825	-63.1933					-64.8847	-64.1492
	-70.4003			-64.8204	-63.1861					-64.878	-64.1447
	-70.399			-64.8162	-63.179					-64.8714	-64.1397
	-70.3981			-64.8124	-63.1722					-64.8651	-64.1345
	-70.3975			-64.8087	-63.1654					-64.859	-64.1292
	-70.3972			-64.8047	-63.1588					-64.8534	-64.1239
	-70.3972			-64.8005	-63.1523					-64.8484	-64.119
	-70.3974			-64.7959	-63.1461					-64.844	-64.1146
	-70.3976			-64.7912	-63.1401					-64.8402	-64.1105
	-70.3979			-64.7864	-63.1343					-64.837	-64.1067
	-70.3982			-64.7815	-63.1283					-64.8343	-64.1026
	-70.3986			-64.7765	-63.1222					-64.8317	-64.098
	-70.3989			-64.7713	-63.1157					-64.8293	-64.0927
	-70.3993			-64.7659	-63.1088					-64.8268	-64.0868
	-70.3997			-64.7603	-63.1016					-64.824	-64.0805
	-70.4			-64.7547	-63.0941					-64.8209	-64.0743
	-70.4002			-64.7493	-63.0864					-64.8174	-64.0686
	-70.4			-64.7442	-63.0786					-64.8137	-64.0638
	-70.3994			-64.7395	-63.0707					-64.8097	-64.0599
	-70.3983			-64.7352	-63.0629					-64.8058	-64.0567
	-70.3967			-64.7313	-63.0554					-64.802	-64.0539
	-70.3944			-64.7276	-63.0483					-64.7982	-64.051
	-70.3916			-64.7239	-63.0416					-64.7947	-64.0478
	-70.3883			-64.7201	-63.0352					-64.7915	-64.0441
	-70.3846			-64.716	-63.029					-64.7884	-64.0401
	-70.3806			-64.7115	-63.0227					-64.7855	-64.036
	-70.3764			-64.7068	-63.0164					-64.7826	-64.0318
	-70.3721			-64.7019	-63.0098					-64.7794	-64.0275
	-70.3676			-64.6972	-63.0031					-64.7758	-64.0233
	-70.3632			-64.6927	-62.9962					-64.7719	-64.0189
	-70.3586			-64.6885	-62.9891					-64.7677	-64.0145
	-70.3539			-64.6846	-62.9818					-64.7634	-64.0101
	-70.3492			-64.6809	-62.9741					-64.7592	-64.0059
	-70.3445			-64.6771	-62.9663					-64.755	-64.0019
	-70.3397			-64.673	-62.9584					-64.7507	-63.9981
	-70.3351			-64.6687	-62.9506					-64.7461	-63.9944
	-70.3306			-64.6641	-62.9431					-64.7411	-63.9906
	-70.3263			-64.6595	-62.936					-64.7356	-63.9865
	-70.3225			-64.6548	-62.929					-64.7301	-63.982
	-70.3192			-64.6502	-62.9221					-64.7249	-63.977
	-70.3166			-64.6457	-62.9152					-64.7204	-63.9715
	-70.3147			-64.6413	-62.9081					-64.7169	-63.9657
	-70.3137			-64.6369	-62.9011					-64.7141	-63.9598
	-70.3136			-64.6326	-62.8943					-64.712	-63.954
	-70.3144			-64.6283	-62.8878					-64.71	-63.9489
	-70.3159			-64.6239	-62.8817					-64.7079	-63.945
	-70.3181			-64.6195	-62.8758					-64.7052	-63.9426
	-70.3206			-64.6151	-62.8699					-64.7022	-63.9418
	-70.3233			-64.6106	-62.8639					-64.6988	-63.9422
	-70.3259			-64.6062	-62.8576					-64.6954	-63.9432
	-70.3281			-64.6017	-62.8511					-64.6919	-63.9435
	-70.3298			-64.5973	-62.8443					-64.6884	-63.9422
	-70.3307			-64.593	-62.8373					-64.6847	-63.9385
	-70.3308			-64.5887	-62.83					-64.6805	-63.9325
	-70.33			-64.5844	-62.8224					-64.6758	-63.9246
	-70.3283			-64.58	-62.8144					-64.6707	-63.9157
	-70.3257			-64.5756	-62.8062					-64.6653	-63.9069
	-70.3221			-64.5711	-62.7979					-64.6601	-63.899
	-70.3178			-64.5666	-62.7898					-64.6552	-63.8923
	-70.3128			-64.5622	-62.7823					-64.6511	-63.8873
	-70.307			-64.5578	-62.7754					-64.6476	-63.8837
	-70.3007			-64.5535	-62.7692					-64.6449	-63.8815
	-70.294			-64.5492	-62.7637					-64.6425	-63.8805
	-70.287			-64.5451	-62.7587					-64.6402	-63.8803
	-70.2798			-64.5412	-62.7539					-64.6379	-63.8805
	-70.2726			-64.5375	-62.7491					-64.6353	-63.8805
	-70.2656			-64.534	-62.744					-64.6327	-63.8797
	-70.259			-64.5309	-62.7388					-64.63	-63.8777
	-70.2527			-64.5281	-62.7333					-64.6277	-63.8744
	-70.247			-64.5254	-62.7277					-64.6258	-63.8698
	-70.2417			-64.5226	-62.722					-64.6243	-63.8643
	-70.2369			-64.5196	-62.7164					-64.6229	-63.8582
	-70.2325			-64.516	-62.7108					-64.6212	-63.8522
	-70.2284			-64.5117	-62.7051					-64.619	-63.8466
	-70.2245			-64.5069	-62.6993					-64.6161	-63.8418
	-70.2206			-64.5015	-62.6933					-64.6126	-63.838
	-70.2165			-64.4958	-62.687					-64.6089	-63.8351
	-70.2122			-64.4902	-62.6806					-64.6054	-63.8331
	-70.2076			-64.4848	-62.674					-64.6024	-63.8316
	-70.2024			-64.4799	-62.6676					-64.6003	-63.8304
	-70.1969			-64.4755	-62.6613					-64.5987	-63.829
	-70.1908			-64.4716	-62.6552					-64.5975	-63.8275
	-70.1845			-64.4681	-62.6495					-64.5962	-63.8256
	-70.1779			-64.465	-62.6438					-64.5947	-63.8234
	-70.1712			-64.462	-62.6381					-64.5926	-63.8209
	-70.1646			-64.4587	-62.632					-64.5903	-63.8181
	-70.1581			-64.4551	-62.6253					-64.5876	-63.815
	-70.1519			-64.4508	-62.618					-64.5848	-63.8115
	-70.146			-64.446	-62.6102					-64.5819	-63.8074
	-70.1404			-64.441	-62.6022					-64.5789	-63.803
	-70.1348			-64.4359	-62.5943					-64.5756	-63.7982
	-70.1293			-64.431	-62.587					-64.5721	-63.7934
	-70.1235			-64.4265	-62.5804					-64.5683	-63.789
	-70.1173			-64.4224	-62.5747					-64.5643	-63.7854
	-70.1107			-64.4186	-62.5697					-64.5603	-63.7829
	-70.1035			-64.4149	-62.5651					-64.5566	-63.7817
	-70.0958			-64.4114	-62.5606					-64.5534	-63.7817
	-70.0876			-64.4078	-62.5559					-64.5509	-63.7823
	-70.0789			-64.4042	-62.5508					-64.5491	-63.7831
	-70.0701			-64.4004	-62.545					-64.5479	-63.7836
	-70.0611			-64.3965	-62.5385					-64.547	-63.7833
	-70.0523			-64.3925	-62.531					-64.546	-63.7821
	-70.0437			-64.3885	-62.5229					-64.5445	-63.7801
	-70.0355			-64.3845	-62.5143					-64.5424	-63.7774
	-70.0278			-64.3805	-62.5057					-64.5395	-63.7742
	-70.0207			-64.3767	-62.4972					-64.5361	-63.7705
	-70.0142			-64.373	-62.4894					-64.5322	-63.7664
	-70.0081			-64.3694	-62.4824					-64.5282	-63.762
	-70.0026			-64.3659	-62.4763					-64.524	-63.7572
	-69.9973			-64.3624	-62.471					-64.5197	-63.752
	-69.9922			-64.3591	-62.4661					-64.5151	-63.7466
	-69.9872			-64.3558	-62.4615					-64.5102	-63.7409
	-69.9821			-64.3526	-62.4567					-64.5052	-63.7353
	-69.9769			-64.3492	-62.4517					-64.5002	-63.7298
	-69.9717			-64.3456	-62.4463					-64.4955	-63.7247
	-69.9663			-64.3416	-62.4408					-64.4911	-63.7201
	-69.9609			-64.3372	-62.4353					-64.4872	-63.7161
	-69.9553			-64.3326	-62.43					-64.4837	-63.7127
	-69.9496			-64.3279	-62.425					-64.4805	-63.7097
	-69.9436			-64.3235	-62.4203					-64.4778	-63.7069
	-69.9374			-64.3196	-62.4158					-64.4753	-63.7043
	-69.9309			-64.3161	-62.4111					-64.473	-63.7017
	-69.9241			-64.3131	-62.4062					-64.4708	-63.6994
	-69.9171			-64.3104	-62.401					-64.4684	-63.6976
	-69.9098			-64.3076	-62.3953					-64.4657	-63.6962
	-69.9025			-64.3045	-62.3892					-64.4624	-63.6952
	-69.8951			-64.3009	-62.383					-64.4585	-63.6944
	-69.8879			-64.2968	-62.3769					-64.4542	-63.6933
	-69.8809			-64.2923	-62.371					-64.4498	-63.6915
	-69.874			-64.2875	-62.3655					-64.4456	-63.689
	-69.8672			-64.2827	-62.3603					-64.4418	-63.6858
	-69.8605			-64.2782	-62.3554					-64.4385	-63.6822
	-69.8537			-64.2739	-62.3504					-64.4359	-63.6787
	-69.8467			-64.2699	-62.345					-64.4337	-63.6755
	-69.8394			-64.2661	-62.3392					-64.432	-63.6727
	-69.8318			-64.2623	-62.3328					-64.4306	-63.6703
	-69.8238			-64.2584	-62.3259					-64.4294	-63.6681
	-69.8155			-64.2542	-62.3187					-64.4283	-63.6659
	-69.8071			-64.2498	-62.3116					-64.4271	-63.6635
	-69.7985			-64.2453	-62.3046					-64.4256	-63.6607
	-69.7901			-64.2409	-62.298					-64.4239	-63.6577
	-69.7821			-64.2369	-62.2917					-64.4218	-63.6546
	-69.7745			-64.2336	-62.2859					-64.4195	-63.6516
	-69.7674			-64.2311	-62.2802					-64.4173	-63.6488
	-69.7608			-64.2295	-62.2745					-64.4152	-63.6466
	-69.7547			-64.2286	-62.2687					-64.4134	-63.6449
	-69.7489			-64.2278	-62.2629					-64.4119	-63.6435
	-69.7432			-64.2267	-62.2572					-64.4106	-63.6424
	-69.7375			-64.2249	-62.2517					-64.4096	-63.6411
	-69.7316			-64.2221	-62.2466					-64.4088	-63.6393
	-69.7253			-64.2185	-62.2419					-64.4082	-63.637
	-69.7186			-64.2143	-62.2377					-64.4077	-63.6341
	-69.7114			-64.2098	-62.234					-64.4071	-63.631
	-69.7038			-64.2054	-62.2305					-64.4063	-63.6279
	-69.6958			-64.2014	-62.2272					-64.4054	-63.6252
	-69.6874			-64.1977	-62.224					-64.4043	-63.6232
	-69.6789			-64.1944	-62.2207					-64.4032	-63.622
	-69.6703			-64.1913	-62.2173					-64.4023	-63.6214
	-69.6617			-64.1883	-62.2136					-64.4015	-63.6211
	-69.6534			-64.1854	-62.2096					-64.4008	-63.6208
	-69.6453			-64.1827	-62.2052					-64.4001	-63.6203
	-69.6378			-64.1799	-62.2005					-64.3993	-63.6191
	-69.6309			-64.1772	-62.1955					-64.3981	-63.6173
	-69.6246			-64.1742	-62.1903					-64.3966	-63.615
	-69.619			-64.1711	-62.1853					-64.3947	-63.6125
	-69.614			-64.1676	-62.1804					-64.3927	-63.61
	-69.6096			-64.164	-62.1759					-64.3905	-63.6077
	-69.6056			-64.1603	-62.1718					-64.3884	-63.6055
	-69.6019			-64.1566	-62.1678					-64.3862	-63.6031
	-69.5983			-64.1529	-62.1639					-64.3841	-63.6004
	-69.5947			-64.1491	-62.1596					-64.3819	-63.5971
	-69.5908			-64.1453	-62.155					-64.3796	-63.5931
	-69.5863			-64.1413	-62.1499					-64.377	-63.5885
	-69.5807			-64.1374	-62.1444					-64.3741	-63.5834
	-69.5734			-64.1335	-62.1388					-64.3709	-63.578
	-69.5635			-64.1298	-62.1331					-64.3676	-63.5724
	-69.5498			-64.1264	-62.1273					-64.3643	-63.5668
	-69.5306			-64.123	-62.1216					-64.3614	-63.5612
	-69.5038			-64.1198	-62.1158					-64.3589	-63.5558
	-69.4666			-64.1165	-62.1099					-64.357	-63.5508
	-69.4156			-64.1132	-62.104					-64.3557	-63.5461
	-69.3474			-64.11	-62.0981					-64.3547	-63.5419
	-69.2586			-64.1069	-62.0925					-64.354	-63.5383
	-69.1468			-64.1042	-62.0874					-64.3536	-63.5352
	-69.0108			-64.1019	-62.0827					-64.3535	-63.5326
	-68.8519			-64.1	-62.0784					-64.3536	-63.5304
	-68.6738			-64.0984	-62.0744					-64.3538	-63.5286
	-68.483			-64.097	-62.0703					-64.354	-63.5271
	-68.2881			-64.0957	-62.0658					-64.3539	-63.5258
	-68.0991			-64.0941	-62.061					-64.3533	-63.5246
	-67.9255			-64.0922	-62.0557					-64.3521	-63.5234
	-67.7754			-64.0896	-62.0502					-64.3503	-63.522
	-67.6538			-64.0863	-62.0446					-64.3479	-63.5203
	-67.5618			-64.0822	-62.0391					-64.3451	-63.5181
	-67.4964			-64.0774	-62.0337					-64.3422	-63.5156
	-67.4511			-64.0721	-62.0285					-64.3393	-63.5129
	-67.4167			-64.0668	-62.0236					-64.3367	-63.51
	-67.383			-64.0617	-62.0191					-64.3344	-63.5074
	-67.34			-64.0573	-62.015					-64.3326	-63.505
	-67.2794			-64.0536	-62.0113					-64.3311	-63.503
	-67.1951			-64.0506	-62.0079					-64.33	-63.5012
	-67.0838			-64.0482	-62.0047					-64.3289	-63.4995
	-66.9446			-64.0462	-62.0015					-64.3277	-63.498
	-66.779			-64.0443	-61.9982					-64.3259	-63.4965
	-66.5899			-64.0423	-61.9947					-64.3233	-63.4953
	-66.3815			-64.0401	-61.9909					-64.3199	-63.4946
	-66.1579			-64.0377	-61.987					-64.3158	-63.4943
	-65.9235			-64.0352	-61.983					-64.3113	-63.4942
	-65.682			-64.0326	-61.9791					-64.3068	-63.4941
	-65.4369			-64.03	-61.9754					-64.3026	-63.4936
	-65.1907			-64.0272	-61.972					-64.2988	-63.4924
	-64.9454			-64.0243	-61.9689					-64.2956	-63.4907
	-64.7025			-64.0212	-61.9661					-64.293	-63.4886
	-64.463			-64.0181	-61.9633					-64.2909	-63.4865
	-64.2275			-64.015	-61.9605					-64.2894	-63.4846
	-63.9965			-64.0121	-61.9576					-64.2884	-63.4831
	-63.77			-64.0096	-61.9544					-64.2876	-63.4821
	-63.548			-64.0073	-61.9509					-64.287	-63.4814
	-63.3305			-64.0055	-61.9469					-64.2863	-63.4809
	-63.1174			-64.004	-61.9423					-64.2853	-63.4804
	-62.9086			-64.0029	-61.937					-64.2841	-63.48
	-62.7039			-64.002	-61.931					-64.2827	-63.4796
	-62.5032			-64.0015	-61.9243					-64.2812	-63.4792
	-62.3065			-64.0012	-61.9172					-64.2798	-63.4787
	-62.1135			-64.0008	-61.9102					-64.2786	-63.4782
	-61.9243			-64.0001	-61.9037					-64.2775	-63.4776
	-61.7386			-63.9987	-61.898					-64.2766	-63.4769
	-61.5564			-63.9964	-61.8931					-64.2758	-63.4762
	-61.3774			-63.993	-61.889					-64.275	-63.4752
	-61.2014			-63.9887	-61.8852					-64.2744	-63.474
	-61.0284			-63.9839	-61.8817					-64.2738	-63.4724
	-60.858			-63.9789	-61.8782					-64.2731	-63.4705
	-60.6901			-63.9742	-61.8745					-64.2722	-63.4681
	-60.5246			-63.97	-61.8708					-64.271	-63.4654
	-60.3613			-63.9664	-61.8669					-64.2692	-63.4624
	-60.2002			-63.9634	-61.863					-64.267	-63.4593
	-60.0411			-63.9607	-61.859					-64.2644	-63.4561
	-59.884			-63.9582	-61.855					-64.2618	-63.4531
	-59.7288			-63.9557	-61.8509					-64.2594	-63.4505
	-59.5757			-63.9532	-61.8466					-64.2573	-63.4485
	-59.4245			-63.9508	-61.842					-64.2559	-63.4471
	-59.2754			-63.9484	-61.837					-64.255	-63.4463
	-59.1283			-63.9461	-61.8316					-64.2547	-63.446
	-58.9832			-63.9441	-61.826					-64.2548	-63.4461
	-58.84			-63.9422	-61.8203					-64.2551	-63.4464
	-58.6986			-63.9405	-61.8148					-64.2553	-63.4468
	-58.5588			-63.9388	-61.8097					-64.2553	-63.4474
	-58.4204			-63.9369	-61.805					-64.2547	-63.4482
	-58.283			-63.9347	-61.8007					-64.2535	-63.4491
	-58.1466			-63.9321	-61.7967					-64.2517	-63.4501
	-58.0108			-63.9289	-61.7929					-64.2495	-63.451
	-57.8754			-63.9254	-61.7893					-64.2474	-63.4515
	-57.7404			-63.9215	-61.7859					-64.2455	-63.4514
	-57.6056			-63.9175	-61.7829					-64.244	-63.4503
	-57.4708			-63.9135	-61.7802					-64.2427	-63.4481
	-57.3359			-63.9098	-61.7778					-64.2415	-63.4448
	-57.2008			-63.9062	-61.7756					-64.2401	-63.4406
	-57.0654			-63.9029	-61.7734					-64.2382	-63.4359
	-56.9295			-63.8999	-61.771					-64.2356	-63.4311
	-56.7931			-63.897	-61.7683					-64.2324	-63.4268
	-56.656			-63.8942	-61.7653					-64.2285	-63.4234
	-56.5181			-63.8913	-61.7621					-64.2243	-63.4211
	-56.3793			-63.8883	-61.7589					-64.2201	-63.4201
	-56.2396			-63.885	-61.7558					-64.2162	-63.4203
	-56.0989			-63.8817	-61.7527					-64.213	-63.4213
	-55.9572			-63.8784	-61.7494					-64.2105	-63.4228
	-55.8147			-63.8753	-61.7458					-64.2088	-63.4245
	-55.6712			-63.8727	-61.7417					-64.2081	-63.426
	-55.5267			-63.8706	-61.7372					-64.2081	-63.4273
	-55.381			-63.869	-61.7324					-64.2088	-63.4281
	-55.2338			-63.8677	-61.7277					-64.2101	-63.4288
	-55.0843			-63.8668	-61.7231					-64.2116	-63.4294
	-54.9313			-63.8661	-61.7187					-64.213	-63.4301
	-54.7727			-63.8656	-61.7146					-64.2139	-63.4312
	-54.6055			-63.8653	-61.7104					-64.2141	-63.4328
	-54.4246			-63.8651	-61.7063					-64.2135	-63.435
	-54.2227			-63.8649	-61.7023					-64.2123	-63.4374
	-53.9887			-63.8645	-61.6984					-64.2107	-63.4399
	-53.7071			-63.8637	-61.6948					-64.2089	-63.4419
	-53.3561			-63.8625	-61.6916					-64.2072	-63.4432
	-52.9067			-63.8608	-61.6887					-64.2059	-63.4433
	-52.321			-63.8585	-61.686					-64.2048	-63.4422
	-51.5524			-63.8559	-61.6833					-64.204	-63.4397
	-50.5446			-63.8531	-61.6807					-64.2033	-63.4362
	-49.2338			-63.8502	-61.6781					-64.2026	-63.4319
	-47.5509			-63.8476	-61.6754					-64.2018	-63.4273
	-45.4258			-63.8452	-61.6726					-64.2011	-63.4225
	-42.7936			-63.8432	-61.6696					-64.2004	-63.4177
	-39.6013			-63.8414	-61.6664					-64.1999	-63.4129
	-35.8162			-63.8398	-61.6628					-64.1995	-63.4083
	-31.433			-63.8382	-61.6589					-64.1994	-63.404
	-26.4804			-63.8366	-61.6546					-64.1995	-63.4005
	-21.0242			-63.8349	-61.65					-64.1998	-63.3982
	-15.1677			-63.8332	-61.6451					-64.2003	-63.3973
	-9.04752			-63.8314	-61.6402					-64.2008	-63.398
	-2.82542			-63.8296	-61.6355					-64.2013	-63.4003
	3.32262			-63.8277	-61.6312					-64.2016	-63.4038
	9.21968			-63.8257	-61.6274					-64.2015	-63.4081
	14.701			-63.8237	-61.6243					-64.201	-63.4126
	19.6257			-63.8216	-61.6219					-64.2001	-63.417
	23.8852			-63.8196	-61.6202					-64.1987	-63.4209
	27.4087			-63.8176	-61.6191					-64.1971	-63.4239
	30.1634			-63.8156	-61.6186					-64.1952	-63.426
	32.1524			-63.8137	-61.6185					-64.1933	-63.4273
	33.4088			-63.8118	-61.6184					-64.1914	-63.4278
	33.9893			-63.81	-61.6182					-64.1896	-63.4278
	33.9663			-63.8083	-61.6176					-64.188	-63.4272
	33.4206			-63.8069	-61.6164					-64.1864	-63.4263
	32.4352			-63.8059	-61.6145					-64.185	-63.4248
	31.0906			-63.8053	-61.612					-64.1836	-63.423
	29.461			-63.805	-61.6088					-64.1822	-63.4207
	27.6119			-63.8048	-61.6049					-64.1809	-63.4183
	25.5997			-63.8045	-61.6005					-64.18	-63.4159
	23.4705			-63.8038	-61.5958					-64.1794	-63.4137
	21.2617			-63.8023	-61.5909					-64.1792	-63.412
	19.0019			-63.8	-61.5862					-64.1795	-63.4108
	16.7124			-63.7967	-61.5818					-64.18	-63.41
	14.4084			-63.7926	-61.5779					-64.1807	-63.4096
	12.1002			-63.788	-61.5746					-64.1812	-63.4094
	9.7939			-63.7833	-61.5718					-64.1816	-63.4094
	7.49298			-63.7788	-61.5692					-64.1816	-63.4095
	5.19865			-63.775	-61.5667					-64.1812	-63.4097
	2.9108			-63.7719	-61.5642					-64.1804	-63.4101
	0.628486			-63.7699	-61.5615					-64.1794	-63.4106
	-1.6495			-63.7687	-61.5586					-64.1783	-63.4112
	-3.92427			-63.7682	-61.5556					-64.1776	-63.4117
	-6.19648			-63.7682	-61.5527					-64.1772	-63.412
	-8.46604			-63.7683	-61.55					-64.1774	-63.4121
	-10.7319			-63.7684	-61.5479					-64.178	-63.4122
	-12.9917			-63.7682	-61.5462					-64.1787	-63.4123
	-15.242			-63.7676	-61.5451					-64.1792	-63.4127
	-17.4776			-63.7665	-61.5442					-64.1792	-63.4136
	-19.6924			-63.7649	-61.5433					-64.1785	-63.4148
	-21.8786			-63.7629	-61.5421					-64.177	-63.4162
	-24.0275			-63.7605	-61.5403					-64.1749	-63.4178
	-26.1296			-63.7579	-61.5379					-64.1727	-63.4194
	-28.1751			-63.7552	-61.535					-64.1708	-63.4206
	-30.1538			-63.7525	-61.5318					-64.1694	-63.4216
	-32.0564			-63.7502	-61.5284					-64.1689	-63.4222
	-33.8741			-63.7483	-61.5251					-64.1691	-63.4224
	-35.5994			-63.7468	-61.5219					-64.1699	-63.4224
	-37.2262			-63.7459	-61.5187					-64.1708	-63.4223
	-38.7503			-63.7453	-61.5155					-64.1715	-63.4221
	-40.1692			-63.7447	-61.5123					-64.1716	-63.4221
	-41.4822			-63.7441	-61.5091					-64.1709	-63.4222
	-42.6904			-63.7433	-61.5059					-64.1695	-63.4226
	-43.7963			-63.7422	-61.5029					-64.1676	-63.4232
	-44.8042			-63.741	-61.5001					-64.1653	-63.4242
	-45.7189			-63.74	-61.4976					-64.1631	-63.4255
	-46.5465			-63.7392	-61.4952					-64.161	-63.4272
	-47.2935			-63.7387	-61.4929					-64.1592	-63.4291
	-47.9663			-63.7384	-61.4906					-64.1579	-63.4312
	-48.5717			-63.7381	-61.4883					-64.157	-63.4333
	-49.116			-63.7374	-61.4861					-64.1566	-63.4353
	-49.6054			-63.736	-61.4838					-64.1566	-63.4367
	-50.0453			-63.734	-61.4816					-64.1569	-63.4375
	-50.441			-63.7314	-61.4794					-64.1575	-63.4374
	-50.7971			-63.7284	-61.4771					-64.1584	-63.4362
	-51.1176			-63.7253	-61.4749					-64.1593	-63.4341
	-51.4064			-63.7224	-61.4726					-64.1604	-63.4314
	-51.6667			-63.7199	-61.4703					-64.1614	-63.4285
	-51.9015			-63.7179	-61.4679					-64.1623	-63.4258
	-52.1135			-63.7161	-61.4654					-64.163	-63.4239
	-52.305			-63.7146	-61.4628					-64.1633	-63.4228
	-52.478			-63.713	-61.4601					-64.1633	-63.4225
	-52.6345			-63.7113	-61.4574					-64.1631	-63.423
	-52.7761			-63.7093	-61.4546					-64.1625	-63.4239
	-52.9041			-63.707	-61.452					-64.1617	-63.425
	-53.02			-63.7043	-61.4496					-64.1605	-63.426
	-53.1247			-63.7014	-61.4475					-64.1592	-63.4269
	-53.2195			-63.6985	-61.4459					-64.1577	-63.4275
	-53.3051			-63.6959	-61.445					-64.1561	-63.4278
	-53.3823			-63.6939	-61.4444					-64.1545	-63.4279
	-53.452			-63.6926	-61.4443					-64.1531	-63.4279
	-53.5145			-63.6922	-61.4442					-64.1522	-63.4281
	-53.5707			-63.6923	-61.4439					-64.152	-63.4288
	-53.6209			-63.6929	-61.4433					-64.1526	-63.4302
	-53.6656			-63.6937	-61.4424					-64.1541	-63.4322
	-53.7055			-63.6945	-61.4413					-64.1563	-63.4349
	-53.7409			-63.6952	-61.44					-64.159	-63.4377
	-53.7723			-63.6956	-61.4388					-64.1618	-63.4402
	-53.8001			-63.6958	-61.4376					-64.1641	-63.4421
	-53.8247			-63.6955	-61.4363					-64.1659	-63.443
	-53.8464			-63.6948	-61.4347					-64.167	-63.443
	-53.8655			-63.6935	-61.4326					-64.1677	-63.4422
	-53.8823			-63.6918	-61.4297					-64.168	-63.4408
	-53.8968			-63.6896	-61.4259					-64.1681	-63.4392
	-53.9092			-63.6871	-61.4214					-64.1683	-63.4376
	-53.9196			-63.6844	-61.4165					-64.1685	-63.4364
	-53.928			-63.6817	-61.4115					-64.1688	-63.4358
	-53.9347			-63.6793	-61.4067					-64.1691	-63.436
	-53.9395			-63.6772	-61.4024					-64.1694	-63.437
	-53.9426			-63.6754	-61.3988					-64.1696	-63.4388
	-53.9441			-63.6738	-61.3959					-64.1698	-63.4411
	-53.9441			-63.6723	-61.3937					-64.1699	-63.4435
	-53.9427			-63.6707	-61.3922					-64.1701	-63.4456
	-53.9402			-63.669	-61.3911					-64.1705	-63.4473
	-53.9366			-63.6673	-61.3903					-64.1713	-63.4485
	-53.9321			-63.6658	-61.3894					-64.1725	-63.4494
	-53.927			-63.6646	-61.3884					-64.1741	-63.4502
	-53.9213			-63.6637	-61.387					-64.1759	-63.4511
	-53.9152			-63.6631	-61.3851					-64.1776	-63.4522
	-53.9087			-63.6626	-61.3828					-64.1792	-63.4533
	-53.9017			-63.6619	-61.3801					-64.1802	-63.4545
	-53.8941			-63.6606	-61.3772					-64.1808	-63.4556
	-53.8859			-63.6588	-61.3743					-64.1809	-63.4566
	-53.8767			-63.6565	-61.3715					-64.1806	-63.4573
	-53.8665			-63.6538	-61.3689					-64.1802	-63.4577
	-53.8551			-63.6511	-61.3667					-64.1796	-63.4579
	-53.8426			-63.6485	-61.3647					-64.1789	-63.4578
	-53.8289			-63.6463	-61.363					-64.1781	-63.4575
	-53.8141			-63.6446	-61.3613					-64.177	-63.4569
	-53.7984			-63.6435	-61.3594					-64.1755	-63.456
	-53.7818			-63.643	-61.3572					-64.1736	-63.455
	-53.7644			-63.643	-61.3547					-64.1714	-63.4539
	-53.7462			-63.6437	-61.352					-64.1691	-63.453
	-53.7269			-63.6446	-61.3493					-64.1665	-63.4525
	-53.7059			-63.6457	-61.3469					-64.1637	-63.4526
	-53.6825			-63.6467	-61.3447					-64.1606	-63.4534
	-53.6552			-63.6472	-61.3431					-64.1573	-63.4551
	-53.6222			-63.6473	-61.3418					-64.154	-63.4574
	-53.5814			-63.6469	-61.3409					-64.1512	-63.4601
	-53.5304			-63.6463	-61.3403					-64.1493	-63.4631
	-53.4669			-63.6457	-61.3399					-64.1488	-63.4659
	-53.3894			-63.6452	-61.3395					-64.1499	-63.4684
	-53.2976			-63.6447	-61.3392					-64.1527	-63.4705
	-53.1931			-63.6443	-61.3387					-64.1568	-63.4722
	-53.0801			-63.6439	-61.338					-64.1618	-63.4737
	-52.9651			-63.6435	-61.3369					-64.1671	-63.4752
	-52.8575			-63.6431	-61.3354					-64.1722	-63.4768
	-52.7685			-63.6427	-61.3334					-64.1767	-63.4787
	-52.7102			-63.6422	-61.3312					-64.1801	-63.4807
	-52.6941			-63.6416	-61.3288					-64.1825	-63.4828
	-52.7299			-63.6408	-61.3265					-64.1837	-63.4848
	-52.8234			-63.6398	-61.3242					-64.1839	-63.4867
	-52.9758			-63.6386	-61.3224					-64.1833	-63.4887
	-53.1829			-63.6374	-61.321					-64.1822	-63.4908
	-53.4345			-63.6364	-61.3201					-64.1812	-63.4934
	-53.7161			-63.6355	-61.3198					-64.1805	-63.4966
	-54.0092			-63.635	-61.32					-64.1805	-63.5003
	-54.2938			-63.6348	-61.3204					-64.1815	-63.5042
	-54.5505			-63.6346	-61.3207					-64.1833	-63.5077
	-54.762			-63.6342	-61.3208					-64.1855	-63.5104
	-54.9154			-63.6334	-61.3204					-64.1879	-63.5118
	-55.0033			-63.632	-61.3193					-64.19	-63.5121
	-55.024			-63.6301	-61.3177					-64.1917	-63.5116
	-54.9817			-63.6278	-61.3157					-64.1929	-63.5108
	-54.8853			-63.6255	-61.3133					-64.1936	-63.5103
	-54.7473			-63.6236	-61.3108					-64.1937	-63.5105
	-54.5819			-63.6221	-61.3082					-64.1934	-63.5113
	-54.4038			-63.6212	-61.3053					-64.1926	-63.5127
	-54.2264			-63.6207	-61.3021					-64.1911	-63.5142
	-54.061			-63.6205	-61.2986					-64.1892	-63.5155
	-53.9156			-63.6204	-61.2949					-64.1869	-63.5162
	-53.7954			-63.6202	-61.2912					-64.1846	-63.5164
	-53.7022			-63.6199	-61.2877					-64.1827	-63.5162
	-53.6354			-63.6194	-61.2846					-64.1815	-63.5158
	-53.5923			-63.6188	-61.282					-64.1812	-63.5154
	-53.569			-63.6179	-61.28					-64.1818	-63.5154
	-53.5611			-63.6169	-61.2784					-64.1833	-63.5158
	-53.5641			-63.6156	-61.2772					-64.1853	-63.5165
	-53.5741			-63.614	-61.2761					-64.1877	-63.5175
	-53.5879			-63.6123	-61.2752					-64.19	-63.5188
	-53.603			-63.6104	-61.2743					-64.192	-63.5205
	-53.6178			-63.6085	-61.2732					-64.1937	-63.5225
	-53.6312			-63.6068	-61.2721					-64.195	-63.5247
	-53.6425			-63.6056	-61.271					-64.1962	-63.5271
	-53.6517			-63.6049	-61.27					-64.1975	-63.5293
	-53.6586			-63.6046	-61.2693					-64.1989	-63.5312
	-53.6635			-63.6046	-61.2692					-64.2005	-63.5326
	-53.6667			-63.6048	-61.2698					-64.2021	-63.5334
	-53.6684			-63.6051	-61.2712					-64.2036	-63.5336
	-53.6691			-63.6052	-61.2732					-64.2047	-63.5335
	-53.6691			-63.6052	-61.2755					-64.2055	-63.5332
	-53.669			-63.6051	-61.2779					-64.2061	-63.5327
	-53.6691			-63.6049	-61.28					-64.2068	-63.5323
	-53.6698			-63.6046	-61.2814					-64.2076	-63.5321
	-53.6713			-63.6043	-61.2818					-64.2085	-63.5321
	-53.6737			-63.6039	-61.2814					-64.2092	-63.5326
	-53.6772			-63.6033	-61.28					-64.2098	-63.5332
	-53.6816			-63.6027	-61.2781					-64.21	-63.5341
	-53.6866			-63.602	-61.2758					-64.2101	-63.535
	-53.6922			-63.6014	-61.2735					-64.2101	-63.5358
	-53.6979			-63.601	-61.2713					-64.2104	-63.5365
	-53.7036			-63.6009	-61.2693					-64.2111	-63.5372
	-53.7091			-63.6011	-61.2674					-64.2121	-63.5379
	-53.7142			-63.6015	-61.2654					-64.2134	-63.5387
	-53.719			-63.6019	-61.2634					-64.2147	-63.5396
	-53.7235			-63.6025	-61.2613					-64.2158	-63.5406
	-53.7277			-63.603	-61.2593					-64.2167	-63.5415
	-53.7319			-63.6035	-61.2575					-64.2173	-63.5425
	-53.7361			-63.6039	-61.2558					-64.2177	-63.5434
	-53.7405			-63.6041	-61.2544					-64.2179	-63.5444
	-53.7452			-63.6041	-61.2532					-64.2182	-63.5455
	-53.7502			-63.6038	-61.2521					-64.2185	-63.5468
	-53.7553			-63.6031	-61.2511					-64.2187	-63.5482
	-53.7607			-63.6022	-61.2501					-64.2188	-63.5497
	-53.7662			-63.6009	-61.2491					-64.2185	-63.5511
	-53.7718			-63.5995	-61.2479					-64.2178	-63.5526
	-53.7775			-63.5978	-61.2466					-64.2166	-63.554
	-53.7834			-63.5961	-61.2451					-64.2151	-63.5556
	-53.7896			-63.5942	-61.2434					-64.2137	-63.5574
	-53.7963			-63.5925	-61.2416					-64.2127	-63.5594
	-53.8037			-63.591	-61.24					-64.2127	-63.5615
	-53.812			-63.5897	-61.2387					-64.2139	-63.5638
	-53.8212			-63.5886	-61.2379					-64.2163	-63.5662
	-53.8315			-63.5878	-61.2376					-64.2197	-63.5686
	-53.8427			-63.5871	-61.2376					-64.2238	-63.5709
	-53.8549			-63.5866	-61.2375					-64.2279	-63.5729
	-53.8677			-63.5862	-61.2372					-64.2316	-63.5747
	-53.8811			-63.5859	-61.2365					-64.2347	-63.5761
	-53.8948			-63.5858	-61.2354					-64.2371	-63.577
	-53.9087			-63.5858	-61.2341					-64.2388	-63.5774
	-53.9227			-63.5858	-61.233					-64.2399	-63.5773
	-53.9367			-63.5859	-61.2323					-64.2407	-63.5766
	-53.9507			-63.5862	-61.2321					-64.2413	-63.5757
	-53.9645			-63.5865	-61.2325					-64.2418	-63.5746
	-53.9782			-63.5868	-61.2333					-64.2422	-63.5736
	-53.9917			-63.5869	-61.2343					-64.2424	-63.5732
	-54.0047			-63.5866	-61.2352					-64.2424	-63.5734
	-54.0171			-63.5859	-61.2357					-64.2421	-63.5745
	-54.0288			-63.5847	-61.2356					-64.2413	-63.5763
	-54.0396			-63.5832	-61.2347					-64.24	-63.5787
	-54.0495			-63.5817	-61.2329					-64.2386	-63.5815
	-54.0586			-63.5803	-61.2303					-64.2372	-63.5845
	-54.067			-63.5792	-61.2268					-64.2363	-63.5877
	-54.0749			-63.5783	-61.2228					-64.236	-63.5909
	-54.0827			-63.5778	-61.2186					-64.2363	-63.5941
	-54.0906			-63.5776	-61.2146					-64.237	-63.5972
	-54.0989			-63.5775	-61.2113					-64.2377	-63.6
	-54.1078			-63.5777	-61.2092					-64.238	-63.6024
	-54.1175			-63.5779	-61.2083					-64.2378	-63.6044
	-54.1278			-63.5781	-61.2086					-64.237	-63.606
	-54.1389			-63.5781	-61.2099					-64.2358	-63.6073
	-54.1505			-63.578	-61.2118					-64.2345	-63.6083
	-54.1625			-63.5777	-61.2136					-64.2336	-63.6094
	-54.175			-63.5773	-61.2151					-64.2332	-63.6106
	-54.1878			-63.5769	-61.216					-64.2337	-63.6119
	-54.201			-63.5767	-61.2161					-64.2348	-63.6134
	-54.2147			-63.5767	-61.2155					-64.2366	-63.6149
	-54.2288			-63.5771	-61.2144					-64.2387	-63.6162
	-54.2434			-63.5779	-61.2129					-64.2409	-63.6171
	-54.2582			-63.579	-61.2112					-64.2432	-63.6176
	-54.2731			-63.5803	-61.2093					-64.2455	-63.6176
	-54.2878			-63.5814	-61.2074					-64.2478	-63.6172
	-54.3019			-63.5822	-61.2056					-64.2503	-63.6165
	-54.3152			-63.5823	-61.2039					-64.2528	-63.6158
	-54.3272			-63.5817	-61.2022					-64.2556	-63.6152
	-54.3379			-63.5801	-61.2006					-64.2583	-63.6148
	-54.3473			-63.5779	-61.1988					-64.2609	-63.6146
	-54.3555			-63.5753	-61.1969					-64.2631	-63.6147
	-54.3628			-63.5727	-61.195					-64.2646	-63.6152
	-54.3696			-63.5704	-61.1932					-64.2652	-63.616
	-54.3763			-63.5689	-61.1919					-64.265	-63.6172
	-54.3833			-63.5682	-61.1912					-64.2641	-63.6191
	-54.3911			-63.5685	-61.1913					-64.2629	-63.6217
	-54.3998			-63.5697	-61.192					-64.2617	-63.625
	-54.4098			-63.5715	-61.1932					-64.2609	-63.629
	-54.421			-63.5737	-61.1944					-64.2607	-63.6334
	-54.4336			-63.5759	-61.1954					-64.2613	-63.6382
	-54.4473			-63.578	-61.1959					-64.2629	-63.6429
	-54.462			-63.5796	-61.1957					-64.2654	-63.6473
	-54.4775			-63.5807	-61.195					-64.2688	-63.651
	-54.4936			-63.581	-61.1938					-64.2729	-63.6539
	-54.51			-63.5807	-61.1925					-64.2776	-63.6557
	-54.5264			-63.5798	-61.1913					-64.2825	-63.6566
	-54.5426			-63.5783	-61.1902					-64.2875	-63.6567
	-54.5585			-63.5766	-61.1895					-64.2921	-63.6566
	-54.5737			-63.575	-61.1889					-64.296	-63.6567
	-54.5883			-63.5737	-61.1883					-64.2989	-63.6576
	-54.6022			-63.5728	-61.1878					-64.3005	-63.6596
	-54.6153			-63.5724	-61.1873					-64.3008	-63.6627
	-54.6279			-63.5724	-61.1869					-64.2998	-63.6664
	-54.6399			-63.5724	-61.1867					-64.2981	-63.6702
	-54.6515			-63.5723	-61.1867					-64.2962	-63.6735
	-54.663			-63.5719	-61.1869					-64.2945	-63.6761
	-54.6745			-63.5712	-61.1872					-64.2936	-63.6778
	-54.6861			-63.5705	-61.1874					-64.2936	-63.6789
	-54.6977			-63.5698	-61.1873					-64.2943	-63.6796
	-54.7093			-63.5693	-61.187					-64.2955	-63.6803
	-54.7205			-63.569	-61.1865					-64.2966	-63.6814
	-54.7313			-63.5688	-61.186					-64.2975	-63.6831
	-54.7411			-63.5686	-61.1855					-64.2979	-63.6855
	-54.7497			-63.5684	-61.1849					-64.2979	-63.6885
	-54.7569			-63.568	-61.1843					-64.2978	-63.692
	-54.7626			-63.5676	-61.1836					-64.2977	-63.6956
	-54.767			-63.5669	-61.1826					-64.2977	-63.6991
	-54.7701			-63.5661	-61.1816					-64.2978	-63.7024
	-54.7726			-63.565	-61.1805					-64.2981	-63.7055
	-54.7749			-63.5639	-61.1796					-64.2985	-63.7085
	-54.7777			-63.5628	-61.1789					-64.299	-63.7115
	-54.7814			-63.5619	-61.1786					-64.2997	-63.7144
	-54.7866			-63.5616	-61.1786					-64.3005	-63.717
	-54.7936			-63.5617	-61.1787					-64.3015	-63.7192
	-54.8027			-63.5624	-61.1787					-64.3027	-63.7207
	-54.8137			-63.5636	-61.1785					-64.3042	-63.7214
	-54.8265			-63.565	-61.1779					-64.3059	-63.7214
	-54.8406			-63.5666	-61.1769					-64.3079	-63.721
	-54.8556			-63.5682	-61.1757					-64.3102	-63.7206
	-54.871			-63.5696	-61.1742					-64.3126	-63.7204
	-54.8863			-63.5708	-61.1726					-64.3153	-63.7208
	-54.901			-63.5715	-61.1711					-64.3179	-63.7217
	-54.9147			-63.5718	-61.1695					-64.3204	-63.7229
	-54.9271			-63.5718	-61.1681					-64.3223	-63.7242
	-54.9382			-63.5714	-61.1669					-64.3236	-63.7256
	-54.948			-63.5709	-61.1661					-64.3242	-63.7268
	-54.9565			-63.5704	-61.1656					-64.3243	-63.728
	-54.9639			-63.5697	-61.1654					-64.324	-63.7292
	-54.9707			-63.569	-61.1654					-64.3237	-63.7307
	-54.9771			-63.5683	-61.1654					-64.3237	-63.7324
	-54.9836			-63.5677	-61.1651					-64.3241	-63.7345
	-54.9904			-63.5671	-61.1643					-64.3252	-63.7369
	-54.9978			-63.5667	-61.1629					-64.3269	-63.7393
	-55.006			-63.5666	-61.1611					-64.3291	-63.7416
	-55.0151			-63.5667	-61.1591					-64.3318	-63.7435
	-55.025			-63.567	-61.1573					-64.3347	-63.7451
	-55.0356			-63.5674	-61.156					-64.3376	-63.7463
	-55.0467			-63.5678	-61.1555					-64.3402	-63.7474
	-55.058			-63.5681	-61.1559					-64.3424	-63.7485
	-55.0695			-63.5682	-61.1572					-64.344	-63.7498
	-55.0809			-63.5681	-61.159					-64.345	-63.7514
	-55.0923			-63.5676	-61.1612					-64.3456	-63.7534
	-55.1035			-63.5671	-61.1634					-64.346	-63.7557
	-55.1145			-63.5666	-61.1654					-64.3466	-63.7582
	-55.1253			-63.5664	-61.167					-64.3476	-63.7606
	-55.136			-63.5667	-61.168					-64.3492	-63.7629
	-55.1465			-63.5674	-61.1683					-64.3516	-63.7648
	-55.1568			-63.5685	-61.168					-64.3544	-63.7664
	-55.1667			-63.5697	-61.1672					-64.3577	-63.7676
	-55.1763			-63.5709	-61.1659					-64.3609	-63.7687
	-55.1856			-63.5718	-61.1646					-64.3639	-63.7696
	-55.1946			-63.5721	-61.1632					-64.3665	-63.7705
	-55.2035			-63.5719	-61.1619					-64.3685	-63.7716
	-55.2122			-63.5714	-61.1606					-64.37	-63.7728
	-55.221			-63.5706	-61.1593					-64.3709	-63.7742
	-55.2298			-63.57	-61.1578					-64.3711	-63.7759
	-55.2388			-63.5696	-61.1561					-64.3709	-63.7781
	-55.2478			-63.5697	-61.1545					-64.3702	-63.7807
	-55.2568			-63.5702	-61.1532					-64.3693	-63.7838
	-55.2657			-63.571	-61.1525					-64.3683	-63.7875
	-55.2745			-63.5719	-61.1526					-64.3674	-63.7915
	-55.283			-63.5728	-61.1535					-64.3669	-63.7958
	-55.2912			-63.5732	-61.1551					-64.3668	-63.8
	-55.2992			-63.5733	-61.1573					-64.367	-63.8039
	-55.307			-63.573	-61.1596					-64.3675	-63.8075
	-55.3146			-63.5723	-61.162					-64.3684	-63.8106
	-55.3221			-63.5715	-61.1643					-64.3699	-63.8132
	-55.3297			-63.5706	-61.1664					-64.372	-63.8153
	-55.3374			-63.5697	-61.1684					-64.3746	-63.8166
	-55.3452			-63.5689	-61.1702					-64.3776	-63.8169
	-55.3531			-63.5681	-61.1717					-64.3806	-63.8163
	-55.3613			-63.5674	-61.173					-64.3832	-63.8146
	-55.3696			-63.5668	-61.1739					-64.3849	-63.8122
	-55.3782			-63.5662	-61.1743					-64.3857	-63.8097
	-55.3869			-63.5657	-61.1742					-64.3857	-63.8079
	-55.3958			-63.5651	-61.1736					-64.3851	-63.8076
	-55.4048			-63.5646	-61.1725					-64.3844	-63.8094
	-55.414			-63.5641	-61.1709					-64.384	-63.8135
	-55.4234			-63.5638	-61.1692					-64.3842	-63.8194
	-55.4329			-63.5635	-61.1674					-64.3853	-63.8264
	-55.4428			-63.5632	-61.1657					-64.3871	-63.8335
	-55.4529			-63.5628	-61.1644					-64.3898	-63.8398
	-55.4634			-63.5623	-61.1633					-64.3931	-63.8446
	-55.4743			-63.5617	-61.1627					-64.397	-63.8479
	-55.4856			-63.5612	-61.1624					-64.4015	-63.8496
	-55.4975			-63.5611	-61.1623					-64.4064	-63.8503
	-55.5097			-63.5614	-61.1626					-64.4115	-63.8504
	-55.5223			-63.5624	-61.1632					-64.4165	-63.8504
	-55.5351			-63.5641	-61.1642					-64.4209	-63.8504
	-55.548			-63.5663	-61.1656					-64.4244	-63.8507
	-55.5607			-63.5688	-61.1674					-64.427	-63.8511
	-55.5732			-63.5714	-61.1693					-64.4285	-63.8517
	-55.5854			-63.5739	-61.1712					-64.429	-63.8524
	-55.5971			-63.5758	-61.1725					-64.4287	-63.8534
	-55.6085			-63.577	-61.1731					-64.428	-63.8549
	-55.6197			-63.5775	-61.1731					-64.4269	-63.8572
	-55.6307			-63.5773	-61.1724					-64.4258	-63.8604
	-55.6418			-63.5767	-61.1715					-64.425	-63.8642
	-55.6531			-63.5759	-61.1706					-64.4247	-63.8686
	-55.6649			-63.5752	-61.1701					-64.4249	-63.8733
	-55.677			-63.5749	-61.17					-64.4256	-63.878
	-55.6896			-63.5751	-61.1704					-64.4267	-63.8828
	-55.7025			-63.5758	-61.1711					-64.428	-63.8873
	-55.7155			-63.577	-61.172					-64.4294	-63.8916
	-55.7285			-63.5784	-61.173					-64.4306	-63.8956
	-55.7411			-63.5799	-61.1739					-64.4318	-63.899
	-55.7532			-63.5814	-61.1748					-64.433	-63.9018
	-55.7647			-63.5826	-61.1756					-64.4342	-63.9038
	-55.7753			-63.5836	-61.1765					-64.4357	-63.9048
	-55.7853			-63.5845	-61.1773					-64.4375	-63.905
	-55.7946			-63.5853	-61.178					-64.4396	-63.9045
	-55.8035			-63.5863	-61.1784					-64.4421	-63.9033
	-55.8121			-63.5874	-61.1787					-64.4449	-63.9019
	-55.8205			-63.5885	-61.1788					-64.4478	-63.9006
	-55.829			-63.5897	-61.1788					-64.4507	-63.8997
	-55.8378			-63.5908	-61.1788					-64.4536	-63.8994
	-55.8469			-63.5917	-61.179					-64.4564	-63.8999
	-55.8563			-63.5922	-61.1794					-64.4587	-63.9012
	-55.8661			-63.5925	-61.18					-64.4605	-63.9031
	-55.8762			-63.5923	-61.1808					-64.4617	-63.9053
	-55.8866			-63.5919	-61.1817					-64.462	-63.9077
	-55.8971			-63.5912	-61.1825					-64.4618	-63.9102
	-55.9076			-63.5904	-61.183					-64.4613	-63.9128
	-55.918			-63.5898	-61.1832					-64.4608	-63.9157
	-55.9281			-63.5893	-61.183					-64.4607	-63.9187
	-55.9381			-63.5891	-61.1826					-64.4612	-63.9218
	-55.9478			-63.5891	-61.1822					-64.4624	-63.9245
	-55.9574			-63.5894	-61.1818					-64.4642	-63.9266
	-55.967			-63.5901	-61.1817					-64.4665	-63.928
	-55.9768			-63.591	-61.1819					-64.4689	-63.9288
	-55.987			-63.5922	-61.1825					-64.4714	-63.9295
	-55.9977			-63.5937	-61.1833					-64.4739	-63.9304
	-56.0091			-63.5953	-61.1845					-64.4763	-63.9319
	-56.0211			-63.597	-61.1857					-64.4786	-63.934
	-56.0336			-63.5984	-61.187					-64.4809	-63.9365
	-56.0464			-63.5994	-61.1883					-64.4831	-63.9391
	-56.0593			-63.6	-61.1895					-64.4852	-63.9414
	-56.0719			-63.6001	-61.1906					-64.487	-63.9432
	-56.0838			-63.5998	-61.1916					-64.4885	-63.9446
	-56.0946			-63.5994	-61.1923					-64.4899	-63.9456
	-56.1043			-63.5989	-61.1927					-64.4911	-63.9465
	-56.1126			-63.5985	-61.1927					-64.4924	-63.9474
	-56.1194			-63.598	-61.1924					-64.4939	-63.9487
	-56.125			-63.5973	-61.1918					-64.4955	-63.9505
	-56.1295			-63.5963	-61.1911					-64.4974	-63.9528
	-56.1332			-63.595	-61.1905					-64.4993	-63.9558
	-56.1366			-63.5934	-61.1901					-64.5012	-63.9592
	-56.1399			-63.5916	-61.1903					-64.5029	-63.9627
	-56.1436			-63.5899	-61.1911					-64.5046	-63.9662
	-56.1481			-63.5885	-61.1925					-64.5063	-63.9693
	-56.1535			-63.5875	-61.1943					-64.5083	-63.9721
	-56.1601			-63.5873	-61.1962					-64.5105	-63.9743
	-56.168			-63.5878	-61.1979					-64.5132	-63.9762
	-56.177			-63.589	-61.1992					-64.5161	-63.9777
	-56.1871			-63.5908	-61.1999					-64.519	-63.979
	-56.1979			-63.5931	-61.2002					-64.5218	-63.9804
	-56.2092			-63.5954	-61.2002					-64.5242	-63.982
	-56.2208			-63.5977	-61.2					-64.526	-63.984
	-56.2322			-63.5995	-61.1998					-64.5272	-63.9864
	-56.2432			-63.6008	-61.1996					-64.528	-63.989
	-56.2537			-63.6017	-61.1995					-64.5286	-63.9916
	-56.2634			-63.6021	-61.1995					-64.5291	-63.9941
	-56.2724			-63.6024	-61.1998					-64.5297	-63.9963
	-56.2806			-63.6027	-61.2003					-64.5304	-63.9981
	-56.2883			-63.6031	-61.2011					-64.5313	-63.9996
	-56.2956			-63.6036	-61.2021					-64.5324	-64.0007
	-56.3028			-63.6043	-61.2032					-64.5339	-64.0015
	-56.3102			-63.6054	-61.2041					-64.5358	-64.0023
	-56.3181			-63.6067	-61.205					-64.538	-64.003
	-56.3268			-63.6085	-61.2056					-64.5403	-64.0038
	-56.3364			-63.6106	-61.2061					-64.5426	-64.0049
	-56.3472			-63.613	-61.2066					-64.5447	-64.0062
	-56.3589			-63.6154	-61.2073					-64.5466	-64.008
	-56.3715			-63.6174	-61.2083					-64.5482	-64.0102
	-56.3848			-63.6188	-61.2097					-64.5498	-64.0128
	-56.3984			-63.6194	-61.2113					-64.5512	-64.0158
	-56.4122			-63.6193	-61.2131					-64.5526	-64.0188
	-56.4258			-63.6188	-61.2148					-64.554	-64.0217
	-56.4392			-63.6181	-61.2164					-64.5555	-64.0244
	-56.4521			-63.6177	-61.2178					-64.557	-64.0266
	-56.4645			-63.6177	-61.2189					-64.5589	-64.0284
	-56.4765			-63.6181	-61.22					-64.5611	-64.0297
	-56.4881			-63.6189	-61.2209					-64.5636	-64.0306
	-56.4994			-63.6197	-61.2216					-64.5662	-64.0312
	-56.5105			-63.6204	-61.222					-64.5686	-64.0319
	-56.5217			-63.6209	-61.222					-64.5704	-64.0329
	-56.5331			-63.6212	-61.2216					-64.5715	-64.0346
	-56.5449			-63.6215	-61.221					-64.5718	-64.0373
	-56.5574			-63.6219	-61.2201					-64.5717	-64.041
	-56.5705			-63.6225	-61.2192					-64.5714	-64.0456
	-56.5843			-63.6231	-61.2184					-64.5714	-64.0508
	-56.5987			-63.6238	-61.2178					-64.5722	-64.0561
	-56.6136			-63.6244	-61.2173					-64.5738	-64.0609
	-56.6287			-63.6247	-61.2167					-64.5762	-64.0648
	-56.6436			-63.6247	-61.2162					-64.5793	-64.0678
	-56.658			-63.6244	-61.2156					-64.5829	-64.0699
	-56.6716			-63.6239	-61.2152					-64.5865	-64.0716
	-56.6841			-63.6235	-61.215					-64.5899	-64.0732
	-56.6953			-63.6232	-61.2151					-64.5929	-64.0752
	-56.705			-63.6231	-61.2158					-64.5953	-64.078
	-56.7134			-63.6232	-61.2169					-64.5971	-64.0818
	-56.7204			-63.6235	-61.2185					-64.5985	-64.0864
	-56.7264			-63.624	-61.2203					-64.5998	-64.0919
	-56.7316			-63.6248	-61.2221					-64.6012	-64.0978
	-56.7364			-63.626	-61.2238					-64.6029	-64.1038
	-56.7412			-63.6276	-61.2252					-64.6048	-64.1093
	-56.7463			-63.6295	-61.2261					-64.6068	-64.1141
	-56.7522			-63.6315	-61.2268					-64.6086	-64.1178
	-56.759			-63.6332	-61.2271					-64.61	-64.1205
	-56.7669			-63.6344	-61.2274					-64.6111	-64.1221
	-56.7759			-63.635	-61.2278					-64.6118	-64.1227
	-56.7859			-63.6351	-61.2283					-64.6122	-64.1226
	-56.7967			-63.6348	-61.2291					-64.6126	-64.1221
	-56.8081			-63.6344	-61.2302					-64.6131	-64.1216
	-56.8197			-63.634	-61.2315					-64.614	-64.1214
	-56.8313			-63.6338	-61.233					-64.6152	-64.1216
	-56.8426			-63.6341	-61.2346					-64.617	-64.1225
	-56.8533			-63.6347	-61.2362					-64.6192	-64.124
	-56.8633			-63.6359	-61.2378					-64.6218	-64.1262
	-56.8724			-63.6376	-61.2396					-64.6246	-64.129
	-56.8806			-63.6398	-61.2416					-64.6277	-64.1325
	-56.8878			-63.6425	-61.2439					-64.6308	-64.1365
	-56.8942			-63.6453	-61.2463					-64.6341	-64.1408
	-56.8997			-63.6481	-61.2488					-64.6372	-64.1452
	-56.9046			-63.6503	-61.2511					-64.6401	-64.1494
	-56.909			-63.6519	-61.2529					-64.6425	-64.153
	-56.9131			-63.6526	-61.2543					-64.6444	-64.1559
	-56.9171			-63.6526	-61.2553					-64.6456	-64.158
	-56.921			-63.6522	-61.2559					-64.6462	-64.1594
	-56.9251			-63.6518	-61.2563					-64.6464	-64.16
	-56.9293			-63.6515	-61.2565					-64.6464	-64.1601
	-56.9338			-63.6515	-61.2568					-64.6463	-64.1599
	-56.9387			-63.6518	-61.257					-64.6464	-64.1596
	-56.9438			-63.6522	-61.2573					-64.6465	-64.1595
	-56.9492			-63.6524	-61.2576					-64.647	-64.1596
	-56.955			-63.6523	-61.2581					-64.6478	-64.1599
	-56.9611			-63.6518	-61.2589					-64.6491	-64.1606
	-56.9675			-63.6511	-61.26					-64.651	-64.1616
	-56.9743			-63.6502	-61.2614					-64.6533	-64.163
	-56.9813			-63.6494	-61.263					-64.6561	-64.165
	-56.9884			-63.6489	-61.2647					-64.6592	-64.1675
	-56.9957			-63.6491	-61.2663					-64.6624	-64.1707
	-57.0031			-63.65	-61.2676					-64.6655	-64.1743
	-57.0104			-63.6516	-61.2687					-64.6686	-64.1782
	-57.0176			-63.6535	-61.2695					-64.6716	-64.182
	-57.0247			-63.6556	-61.2702					-64.6745	-64.1854
	-57.0319			-63.6572	-61.271					-64.6774	-64.1882
	-57.0392			-63.6582	-61.2719					-64.6802	-64.1902
	-57.0466			-63.6584	-61.2729					-64.6829	-64.1917
	-57.0545			-63.6577	-61.2743					-64.6853	-64.1928
	-57.0628			-63.6564	-61.2758					-64.6874	-64.1941
	-57.0717			-63.6548	-61.2774					-64.6891	-64.1956
	-57.0811			-63.6534	-61.2791					-64.6905	-64.1976
	-57.0909			-63.6528	-61.281					-64.6915	-64.1999
	-57.1011			-63.6533	-61.2829					-64.6924	-64.2025
	-57.1115			-63.6552	-61.2848					-64.6933	-64.2051
	-57.1219			-63.6584	-61.2868					-64.6942	-64.2077
	-57.1324			-63.6627	-61.2887					-64.6953	-64.2103
	-57.1429			-63.6676	-61.2904					-64.6965	-64.213
	-57.1536			-63.6726	-61.2917					-64.698	-64.2159
	-57.1646			-63.6771	-61.2925					-64.6994	-64.2192
	-57.1761			-63.6809	-61.2927					-64.7009	-64.2229
	-57.1882			-63.6837	-61.2921					-64.702	-64.2271
	-57.201			-63.6856	-61.291					-64.7029	-64.2315
	-57.2144			-63.6865	-61.2895					-64.7034	-64.2361
	-57.2284			-63.6867	-61.288					-64.7038	-64.2407
	-57.2427			-63.6864	-61.2868					-64.7044	-64.2452
	-57.2572			-63.6859	-61.2862					-64.7054	-64.2494
	-57.2714			-63.6855	-61.2864					-64.7073	-64.2531
	-57.2853			-63.6854	-61.2873					-64.7099	-64.2564
	-57.2984			-63.6858	-61.2888					-64.7132	-64.2593
	-57.3107			-63.6868	-61.2907					-64.717	-64.2618
	-57.3219			-63.6883	-61.2928					-64.721	-64.264
	-57.3318			-63.69	-61.2948					-64.7248	-64.2658
	-57.3405			-63.6918	-61.2968					-64.7283	-64.2673
	-57.3478			-63.6933	-61.2984					-64.7312	-64.2683
	-57.3537			-63.6942	-61.2997					-64.7336	-64.269
	-57.3583			-63.6946	-61.3006					-64.7353	-64.2694
	-57.3616			-63.6946	-61.3011					-64.7363	-64.2697
	-57.3637			-63.6944	-61.3014					-64.7365	-64.2702
	-57.365			-63.6943	-61.3014					-64.7362	-64.2711
	-57.3656			-63.6946	-61.3013					-64.7356	-64.2728
	-57.3659			-63.6955	-61.3013					-64.7351	-64.2751
	-57.3661			-63.6969	-61.3014					-64.735	-64.2778
	-57.3666			-63.6986	-61.3016					-64.7357	-64.2808
	-57.3676			-63.7002	-61.3021					-64.7373	-64.284
	-57.3694			-63.7017	-61.3029					-64.7397	-64.2872
	-57.3721			-63.7028	-61.304					-64.7428	-64.2903
	-57.3758			-63.7035	-61.3056					-64.7464	-64.2934
	-57.3805			-63.704	-61.3077					-64.7502	-64.2963
	-57.3863			-63.7047	-61.3102					-64.7539	-64.2992
	-57.3932			-63.7056	-61.3131					-64.7574	-64.3018
	-57.4009			-63.7069	-61.3162					-64.7605	-64.3045
	-57.4094			-63.7085	-61.3193					-64.7632	-64.3072
	-57.4185			-63.7104	-61.3223					-64.7657	-64.31
	-57.4279			-63.7122	-61.3248					-64.768	-64.3129
	-57.4375			-63.7138	-61.3267					-64.7702	-64.3156
	-57.447			-63.7149	-61.328					-64.7726	-64.3181
	-57.4562			-63.7156	-61.3288					-64.7751	-64.32
	-57.465			-63.7158	-61.3289					-64.7778	-64.3213
	-57.4733			-63.7158	-61.3286					-64.7804	-64.3221
	-57.4808			-63.7157	-61.3279					-64.7829	-64.3225
	-57.4876			-63.7156	-61.327					-64.7853	-64.3229
	-57.4935			-63.7156	-61.326					-64.7875	-64.3235
	-57.4988			-63.7158	-61.3252					-64.7894	-64.3245
	-57.5033			-63.7163	-61.3247					-64.7912	-64.326
	-57.5073			-63.7171	-61.3249					-64.7928	-64.3278
	-57.5109			-63.7183	-61.3257					-64.7943	-64.3296
	-57.5143			-63.7196	-61.3273					-64.7959	-64.3314
	-57.5178			-63.7211	-61.3296					-64.7977	-64.3331
	-57.5216			-63.7224	-61.3324					-64.8	-64.3347
	-57.5259			-63.7237	-61.3354					-64.8027	-64.3362
	-57.5307			-63.7247	-61.3385					-64.8058	-64.3377
	-57.5363			-63.7257	-61.3414					-64.8091	-64.339
	-57.5424			-63.7265	-61.3441					-64.8122	-64.3401
	-57.5492			-63.7271	-61.3464					-64.8149	-64.3407
	-57.5564			-63.7276	-61.3484					-64.8168	-64.3409
	-57.564			-63.7278	-61.35					-64.8179	-64.3409
	-57.5718			-63.7278	-61.3513					-64.8183	-64.3408
	-57.5797			-63.7278	-61.3523					-64.8183	-64.3414
	-57.5875			-63.7279	-61.3531					-64.8183	-64.343
	-57.5951			-63.7282	-61.3537					-64.8188	-64.346
	-57.6026			-63.7285	-61.3541					-64.8201	-64.3504
	-57.6099			-63.729	-61.3545					-64.8222	-64.3559
	-57.6169			-63.7294	-61.3549					-64.8249	-64.362
	-57.6237			-63.7298	-61.3555					-64.8279	-64.3679
	-57.6302			-63.7303	-61.3562					-64.8308	-64.3727
	-57.6365			-63.7311	-61.3571					-64.8333	-64.376
	-57.6425			-63.7322	-61.358					-64.8354	-64.3775
	-57.6483			-63.7335	-61.3588					-64.8372	-64.3775
	-57.6538			-63.7349	-61.3595					-64.8387	-64.3764
	-57.6591			-63.7363	-61.36					-64.8401	-64.3748
	-57.6642			-63.7375	-61.3604					-64.8414	-64.3733
	-57.6691			-63.7384	-61.3608					-64.8427	-64.372
	-57.6738			-63.739	-61.3612					-64.8439	-64.3711
	-57.6781			-63.7395	-61.3616					-64.8452	-64.3704
	-57.6817			-63.7399	-61.3623					-64.8468	-64.3698
	-57.6837			-63.7405	-61.3631					-64.8489	-64.3695
	-57.6833			-63.7411	-61.3641					-64.8514	-64.3696
	-57.679			-63.7417	-61.3652					-64.8541	-64.3703
	-57.6688			-63.7421	-61.3663					-64.8568	-64.3716
	-57.6505			-63.7422	-61.3676					-64.8591	-64.3738
	-57.6219			-63.7421	-61.369					-64.8608	-64.3768
	-57.5808			-63.7418	-61.3704					-64.8619	-64.3806
	-57.5258			-63.7415	-61.372					-64.8627	-64.3852
	-57.4567			-63.7414	-61.3736					-64.8632	-64.3902
	-57.3752			-63.7416	-61.3753					-64.864	-64.3955
	-57.2853			-63.7424	-61.3772					-64.8651	-64.4006
	-57.1932			-63.7437	-61.3794					-64.8667	-64.4054
	-57.1077			-63.7455	-61.3817					-64.8686	-64.4095
	-57.0396			-63.7477	-61.3842					-64.8707	-64.4131
	-57.0003			-63.7502	-61.3869					-64.8726	-64.4163
	-57.0008			-63.7527	-61.3895					-64.8743	-64.4191
	-57.0506			-63.7552	-61.3921					-64.8756	-64.4219
	-57.1554			-63.7576	-61.3943					-64.877	-64.4246
	-57.3166			-63.7599	-61.3962					-64.8786	-64.4271
	-57.5305			-63.7621	-61.3977					-64.881	-64.4292
[truncated: 49,002 more rows]
