# Supplementary material for: Dendritic sodium spikes are required for long-term potentiation at distal synapses on hippocampal pyramidal neurons
Source: eLife. 2015 Aug 6;4:e06414. doi: 10.7554/eLife.06414 (PMC4576155; doi:10.7554/eLife.06414)
Supplement: Figure 4—source data 1. — DOI: http://dx.doi.org/10.7554/eLife.06414.017 [file elife06414s006.xlsx]

## Sheet: Figure 4
Panel A	Top			Down		Panel B	Top					Panel C	Top			Down		Panel D	Top			Down		Panel E	control		AP5		Nimodipine		Ni		TTX		AP5+Nimodipine			Panel F		control	Ni	Nimo	AP5	AP5+Nimo	TTX
	sampling rate 50000 Hz			sampling rate 0.05 Hz			sampling rate 50000 Hz		Down	sampling rate 0.05 Hz			sampling rate 50000 Hz			sampling rate 0.05 Hz			sampling rate 50000 Hz			sampling rate 0.05 Hz			Mean	SEM	Mean	SEM	Mean	SEM	Mean	SEM	Mean	SEM	Mean	SEM				1.21272	1.72156	1.14202	2.00931	1.31609	0.926068
	1	2		4.45559			1	2		2.83608			1	2		3.27922			1	2		4.57293			0.936703	0.0468076	0.932713	0.0272142	0.926996	0.0327198	0.938279	0.0261329	1.0448	0.0368555	0.935427	0.0252392				1.3804	1.56224	1.77263	1.17657	1.1176	1.15871
	-65.8557	-66.1909		3.24578			-67.5715	-67.7822		3.34013			-65.5228	-65.9157		3.863			-66.388	-65.8541		4.14404			0.942606	0.0274925	1.03555	0.028241	0.996917	0.0554586	1.00481	0.0451989	0.956897	0.0677191	0.955328	0.0319899				1.534	1.0285	0.827851	1.32048	0.759347	0.75656
	-65.8569	-66.193		4.07745			-67.5713	-67.782		3.90381			-65.5231	-65.9152		2.1753			-66.3883	-65.8542		3.55928			1.0569	0.0443053	0.964844	0.0444209	0.981802	0.0214116	1.0177	0.0600185	1.01457	0.0549086	0.999301	0.0209676				1.51997	2.37455	1.45791	1.15552	1.10992	1.02643
	-65.8578	-66.1948		4.52244			-67.5708	-67.7813		3.63442			-65.5241	-65.9138		2.88234			-66.3891	-65.8544		3.90167			0.993493	0.0361051	1.03038	0.0327131	0.902634	0.0399302	1.04699	0.0478528	0.999402	0.046662	1.04553	0.0365196				2.82908	1.71656	0.656861	1.25651	0.950405	0.712732
	-65.8583	-66.1962		2.48726			-67.5699	-67.7803		3.99802			-65.5256	-65.9115		2.98563			-66.3905	-65.8548		3.56231			1.02502	0.0377811	0.99771	0.0297023	1.02598	0.0383345	1.01773	0.0268029	0.954996	0.0230063	0.973493	0.0239162				1.44194	1.54862	1.65319	1.42197	1.19814	1.34961
	-65.8583	-66.1972		5.11623			-67.5687	-67.779		3.33227			-65.5276	-65.9082		2.45702			-66.3921	-65.8555		3.80794			0.961957	0.0286761	0.952656	0.0257394	1.00817	0.0372206	0.958541	0.0432216	0.978872	0.0352163	1.04658	0.0212994				1.54978	1.71119	1.46801	1.17452	0.969086	1.43785
	-65.8579	-66.1978		4.22832			-67.5672	-67.7775		2.99886			-65.5301	-65.9042		2.47264			-66.394	-65.8564		3.10904			1.05707	0.044933	1.0236	0.0313571	1.08127	0.0317713	1.04701	0.0606386	0.992453	0.0314384	1.0097	0.0297157				1.41623	1.78514	1.58163	1.28789	0.95968	1.21783
	-65.8572	-66.1979		5.61993			-67.5656	-67.776		3.04789			-65.5329	-65.8993		2.90074			-66.3958	-65.8576		2.9355			1.02625	0.0331079	1.0475	0.0260452	1.07622	0.0396647	0.968942	0.0393806	1.07524	0.0198817	1.03464	0.0286422				1.74471	1.53414	1.49089	0.88637	0.974251
	-65.856	-66.1977		4.37106			-67.5639	-67.7746		3.76094			-65.5358	-65.8936		2.94424			-66.3974	-65.8591		2.49657																					1.10543	1.16791
	-65.8545	-66.1971		6.24372			-67.5621	-67.7734		3.62536			-65.5389	-65.8874		3.56813			-66.3986	-65.8608		3.72273																					1.30784	0.839127
	-65.8527	-66.1961		3.6068			-67.5604	-67.7727		4.24247			-65.5419	-65.8806		3.3632			-66.3994	-65.8627		4.83592			1.56348	0.277985	1.36637	0.0894341	1.73139	0.17342	1.54677	0.198212	1.20941	0.170501	1.30482	0.0687957
	-65.8507	-66.1948		4.34907			-67.5588	-67.7724		2.99235			-65.5449	-65.8735		2.78618			-66.3997	-65.8647		3.43131			1.4364	0.181931	1.26025	0.0870598	1.56446	0.135101	1.3842	0.15122	1.16262	0.129006	1.14706	0.037168			Mean	1.62543	1.66472	1.339	1.2807	1.03287	1.07322
	-65.8485	-66.1933		4.84325			-67.5574	-67.7728		3.20002			-65.5477	-65.8662		3.1511			-66.3995	-65.8667		2.79813			1.47009	0.183083	1.22966	0.0953637	1.4668	0.108566	1.5023	0.161145	1.11966	0.125143	1.12029	0.0418374			SEM	0.157938	0.116205	0.127195	0.0840563	0.0496251	0.0936973
	-65.8463	-66.1915		5.04881			-67.5563	-67.7737		3.76878			-65.5503	-65.8589		3.10766			-66.3989	-65.8687		3.89793			1.39565	0.152583	1.23227	0.0711659	1.48454	0.0937435	1.44769	0.124753	1.12606	0.100475	1.02019	0.0534318
	-65.844	-66.1895		3.56847			-67.5554	-67.7753		3.72584			-65.5527	-65.8517		2.42484			-66.398	-65.8706		4.58084			1.35485	0.119053	1.3228	0.0811838	1.37832	0.0663987	1.44899	0.125726	1.17218	0.131988	0.99972	0.0364179
	-65.8418	-66.1875		4.96205			-67.5549	-67.7775		3.09364			-65.5548	-65.8448		2.5009			-66.3968	-65.8725		3.72514			1.46969	0.14098	1.25022	0.0585453	1.44257	0.0733174	1.48855	0.110533	1.09029	0.13603	0.995249	0.0553612
	-65.8395	-66.1852		4.22379			-67.5547	-67.7802		2.99575			-65.5566	-65.8383		3.0305			-66.3954	-65.8741		4.11852			1.43109	0.167863	1.18471	0.0420427	1.40567	0.112181	1.57656	0.097065	1.08944	0.0800501	1.04805	0.0490221
	-65.8374	-66.1829		3.98999			-67.5549	-67.7833		3.95189			-65.5582	-65.8323		3.35269			-66.3937	-65.8756		4.04557			1.69214	0.262234	1.22459	0.0703732	1.47186	0.0873045	1.49294	0.0979027	1.06375	0.114655	1.01522	0.0592841
	-65.8355	-66.1805		4.23805			-67.5553	-67.7866		4.53631			-65.5596	-65.827		3.11784			-66.3916	-65.8768		4.13148			1.62976	0.294237	1.20014	0.0556696	1.40718	0.106721	1.50451	0.064974	1.03351	0.072946	1.02473	0.0674291
	-65.8337	-66.178		4.70671			-67.556	-67.7901		3.56244			-65.5607	-65.8224		2.88578			-66.3892	-65.8777		4.40393			1.62116	0.203155	1.25276	0.0647397	1.36597	0.11513	1.5877	0.0953303	1.02897	0.0603759	1.03371	0.0523017
	-65.832	-66.1755		4.4727			-67.5568	-67.7934		3.91736			-65.5616	-65.8185		2.11209			-66.3863	-65.8782		4.06504			1.64232	0.1972	1.23153	0.0600361	1.31025	0.110764	1.5764	0.10488	1.10279	0.0503918	0.996929	0.0517532
	-65.8307	-66.173		3.33558			-67.5578	-67.7966		3.70563			-65.5623	-65.8154		2.78468			-66.3831	-65.8782		4.52814			1.52271	0.18777	1.15988	0.0548889	1.26039	0.10249	1.49832	0.101091	1.09431	0.0860395	1.00969	0.0668496
	-65.8295	-66.1705		3.04855			-67.5587	-67.7995		3.21185			-65.5629	-65.813		2.99711			-66.3796	-65.8777		4.13814			1.60079	0.200314	1.24738	0.0553518	1.35777	0.128041	1.45358	0.0645589	1.03382	0.0834438	1.02394	0.0561668
	-65.8286	-66.1682		5.50041			-67.5596	-67.802		3.22717			-65.5633	-65.8115		3.0049			-66.376	-65.8767		3.69609			1.53018	0.133783	1.25084	0.0570574	1.45945	0.109577	1.58135	0.0996117	1.06199	0.0963332	1.03145	0.0451142
	-65.8279	-66.1659		5.31824			-67.5603	-67.804		4.15973			-65.5636	-65.8106		3.16356			-66.3726	-65.8752		3.42562			1.56394	0.163411	1.27691	0.0778411	1.46511	0.123782	1.57147	0.0773477	1.08369	0.0851758	1.06992	0.0580356
	-65.8274	-66.1638		4.25565			-67.5608	-67.8055		4.22393			-65.5638	-65.8105		3.04689			-66.3694	-65.8732		3.82873			1.5266	0.0981986	1.25672	0.0622889	1.50121	0.131975	1.69973	0.115438	1.14587	0.103505	1.05326	0.0549706
	-65.827	-66.1618					-67.561	-67.8064		3.25788			-65.564	-65.8111		3.02684			-66.3669	-65.8709		3.20067			1.58209	0.175909	1.28102	0.0755617	1.37448	0.129752	1.61537	0.123525	1.04517	0.0635062	1.02329	0.0525072
	-65.8268	-66.1602		7.8317			-67.5608	-67.8069					-65.5641	-65.8122		0			-66.365	-65.8683					1.54611	0.192247	1.26751	0.068182	1.44686	0.134119	1.7041	0.129428	1.09372	0.086057	1.00074	0.0328203
	-65.8267	-66.1588		7.10601			-67.5603	-67.807		6.62002			-65.5642	-65.8139		3.4873			-66.3638	-65.8655		9.81115			1.64601	0.280763	1.29386	0.0773392	1.44464	0.120123	1.63908	0.114057	1.13195	0.0852255	1.00194	0.0691083
	-65.8266	-66.1576		5.99997			-67.5594	-67.8067		5.68946			-65.5645	-65.8161		4.73153			-66.3632	-65.8627		9.65195			1.58566	0.169448	1.39475	0.0751089	1.30163	0.12367	1.61269	0.0906092	1.10406	0.0614422	1.03256	0.0592492
	-65.8264	-66.1567		5.75089			-67.5582	-67.8061		5.48032			-65.5648	-65.8187		3.41587			-66.3632	-65.86		8.91314			1.64138	0.198476	1.38938	0.102927	1.29713	0.128284	1.59466	0.104949	1.03823	0.0803427	1.05886	0.0590767
	-65.8262	-66.1561		6.76319			-67.5567	-67.8053		5.55944			-65.5653	-65.8217		3.53322			-66.3636	-65.8577		8.26538			1.62093	0.165622	1.37473	0.105917	1.29794	0.124026	1.6888	0.0976858	1.04472	0.0882976	1.06456	0.0566302
	-65.8259	-66.1557		5.77249			-67.5551	-67.8043		4.53867			-65.566	-65.8248		3.25957			-66.3642	-65.8559		7.11958			1.53239	0.203817	1.28423	0.0964862	1.36607	0.124668	1.69514	0.091577	1.09039	0.0712451	1.07286	0.0616259
	-65.8255	-66.1554		6.20862			-67.5535	-67.8033		3.95808			-65.5669	-65.8281		3.45782			-66.3648	-65.8548		9.10383			1.68742	0.192701	1.28145	0.0737422	1.42933	0.114712	1.65156	0.0996138	1.00517	0.0985636	1.11587	0.059767
	-65.825	-66.1553		5.31446			-67.5519	-67.8024		5.54376			-65.568	-65.8316		3.57886			-66.3654	-65.8545		7.48161			1.60937	0.1934	1.29737	0.0847228	1.3246	0.111548	1.71522	0.120856	1.0837	0.125115	1.02825	0.0541745
	-65.8243	-66.1552		7.0641			-67.5506	-67.8015		5.97099			-65.5694	-65.8351		3.67088			-66.3661	-65.855		7.9458			1.53068	0.143648	1.22576	0.0950446	1.28578	0.102489	1.67578	0.110853	1.11864	0.120922	1.04509	0.0476318
	-65.8236	-66.155		6.55111			-67.5496	-67.8007		4.20759			-65.5709	-65.8387		3.9299			-66.3667	-65.8562		6.96222			1.60899	0.260312	1.25899	0.0863676	1.25235	0.129066	1.68666	0.128524	1.04326	0.0861275	1.05513	0.061438
	-65.8228	-66.1548		6.26398			-67.549	-67.8001		5.28736			-65.5727	-65.8423		3.76311			-66.3675	-65.858		7.81214			1.66625	0.145831	1.30802	0.0818934	1.37957	0.141229	1.68826	0.14326	1.11679	0.110367	1.05701	0.0462149
	-65.8221	-66.1544		6.771			-67.5489	-67.7998		4.06828			-65.5746	-65.8459		2.77495			-66.3685	-65.8602		7.54039			1.66115	0.261054	1.29315	0.0876525	1.39405	0.147396	1.58528	0.10044	1.05257	0.086571	0.993573	0.0540745
	-65.8215	-66.1538		6.35378			-67.5495	-67.7997		4.341			-65.5767	-65.8496		3.23851			-66.3698	-65.8622		7.64312			1.72429	0.234604	1.31756	0.0890166	1.38325	0.150688	1.68763	0.117756	1.03486	0.0945754	1.01354	0.0600508
	-65.8211	-66.1531		6.00518			-67.5506	-67.7999		5.04429			-65.5788	-65.8534		3.63058			-66.3715	-65.864		6.65962
	-65.821	-66.1521		6.53059			-67.5524	-67.8003		4.4501			-65.5808	-65.8571		2.76942			-66.3735	-65.865		7.48424
	-65.8211	-66.1509		5.19402			-67.5547	-67.8009		5.74975			-65.5828	-65.8609		2.45172			-66.3759	-65.8651		7.05687
	-65.8217	-66.1496		6.10029			-67.5576	-67.8018		5.24374			-65.5846	-65.8645		2.98946			-66.3784	-65.8643		7.15153
	-65.8226	-66.1481		6.50054			-67.5608	-67.8028		5.48175			-65.5861	-65.8681		3.59016			-66.3809	-65.8624		7.31329
	-65.824	-66.1466		5.77088			-67.5644	-67.8038		4.20099			-65.5874	-65.8715		4.00954			-66.3831	-65.8598		7.03277
	-65.8257	-66.1452		6.13923			-67.5681	-67.8048		4.41555			-65.5883	-65.8747		3.94065			-66.385	-65.8566		6.93675
	-65.8279	-66.1439		6.69714			-67.5718	-67.8056		4.87018			-65.5888	-65.8775		4.0833			-66.3862	-65.8533		7.42587
	-65.8303	-66.1428		6.73286			-67.5754	-67.8061		5.09777			-65.589	-65.88		3.43128			-66.3869	-65.8501		7.47917
	-65.8329	-66.1419		5.68937			-67.5787	-67.8062		4.28333			-65.5888	-65.882		4.07101			-66.3871	-65.8474		7.82924
	-65.8358	-66.1413		6.69063			-67.5817	-67.8058		5.17141			-65.5883	-65.8836		3.83589			-66.3869	-65.8455		6.81335
	-65.8388	-66.1411		6.96599			-67.5843	-67.8047		4.96977			-65.5874	-65.8848		3.04596			-66.3865	-65.8444		5.82037
	-65.8418	-66.1413		5.96			-67.5864	-67.803		5.36623			-65.5864	-65.8854		4.10236			-66.3861	-65.8443		6.93613
	-65.8449	-66.1419		7.06335			-67.5881	-67.8006		4.54706			-65.5852	-65.8857		3.09124			-66.3859	-65.8451		6.69854
	-65.8478	-66.1428		7.22172			-67.5893	-67.7973		4.99934			-65.5838	-65.8855		4.05815			-66.3861	-65.8466		5.97076
	-65.8508	-66.1441		6.13977			-67.5901	-67.7934		4.78369			-65.5823	-65.885		3.6347			-66.3867	-65.8486		5.86708
	-65.8536	-66.1457		6.11959			-67.5905	-67.7888		4.47484			-65.5807	-65.884		3.92865			-66.3878	-65.8511		7.15095
	-65.8562	-66.1476		6.39412			-67.5906	-67.7837		4.71497			-65.5791	-65.8826		2.37945			-66.3893	-65.8538		5.75189
	-65.8587	-66.1497		5.81133			-67.5905	-67.7781		4.30074			-65.5774	-65.8808		3.46034			-66.3909	-65.8565		5.70373
	-65.8611	-66.152		5.12424			-67.5903	-67.7722		4.86262			-65.5757	-65.8785		3.20365			-66.3926	-65.8591		5.83833
	-65.8632	-66.1545		6.05105			-67.5901	-67.7661		5.5215			-65.5739	-65.8757		3.50514			-66.394	-65.8615		6.41745
	-65.865	-66.1571		5.46772			-67.59	-67.7601		4.68353			-65.5721	-65.8724		4.11586			-66.3949	-65.8634		5.85203
	-65.8666	-66.1597		6.26073			-67.59	-67.7543		4.14915			-65.5703	-65.8685		3.3164			-66.3953	-65.8649		4.28587
	-65.8679	-66.1624		4.27969			-67.5902	-67.7489		5.58598			-65.5684	-65.8639		3.63278			-66.3949	-65.8657		5.19702
	-65.8688	-66.165		5.85977			-67.5906	-67.7441		5.24219			-65.5666	-65.8588		3.23881			-66.3937	-65.8658		5.29884
	-65.8693	-66.1675		6.75008			-67.5914	-67.74		2.98238			-65.5648	-65.8532		2.65953			-66.3919	-65.8652		5.20659
	-65.8694	-66.1699		5.99604			-67.5925	-67.7368		4.8222			-65.563	-65.8471		2.90448			-66.3896	-65.864		7.35293
	-65.869	-66.1721		5.48207			-67.594	-67.7346		4.46098			-65.5615	-65.8407		2.97461			-66.3872	-65.8621		6.23228
	-65.8682	-66.1739		5.01278			-67.596	-67.7334		5.72303			-65.5601	-65.8342		3.19279			-66.3852	-65.8599		5.62246
	-65.867	-66.1755		6.37438			-67.5984	-67.7332		4.08958			-65.5588	-65.8276		2.91393			-66.384	-65.8574		7.30178
	-65.8654	-66.1766		6.45411			-67.6012	-67.7339		4.94111			-65.5578	-65.8211		3.09359			-66.384	-65.855		5.65733
	-65.8634	-66.1773		6.93621			-67.6045	-67.7356		4.25105			-65.557	-65.815		2.83712			-66.3856	-65.8528		6.94444
	-65.8612	-66.1775		5.88371			-67.6081	-67.738		4.20414			-65.5563	-65.8093		3.07312			-66.389	-65.851		6.07042
	-65.8588	-66.1773		5.56057			-67.612	-67.741		4.06075			-65.5557	-65.8043		2.68817			-66.3941	-65.8498		7.37164
	-65.8562	-66.1767		6.70712			-67.6162	-67.7444		4.66744			-65.5552	-65.7999		2.12693			-66.4007	-65.8493		6.14949
	-65.8536	-66.1756		6.43307			-67.6205	-67.748		5.13736			-65.5548	-65.7963		3.71431			-66.4082	-65.8494		6.51654
	-65.851	-66.1743		6.88618			-67.6248	-67.7516		3.56071			-65.5543	-65.7935		3.58074			-66.4161	-65.8503		7.19224
	-65.8485	-66.1727		6.37299			-67.6291	-67.755		5.23604			-65.5537	-65.7916		3.50172			-66.4237	-65.8518		4.72561
	-65.8462	-66.1709		6.26519			-67.6332	-67.758		5.23668			-65.553	-65.7904		2.90949			-66.4301	-65.8538		5.00919
	-65.844	-66.169		5.96939			-67.637	-67.7605		5.40088			-65.5521	-65.7899		2.86162			-66.4349	-65.8561		6.62055
	-65.8421	-66.1671		5.32392			-67.6405	-67.7623		5.73496			-65.551	-65.79		2.84018			-66.4376	-65.8587		7.00775
	-65.8404	-66.1652		5.11415			-67.6436	-67.7635		5.46474			-65.5498	-65.7907		3.22922			-66.4378	-65.8612		7.13264
	-65.8389	-66.1635		6.25121			-67.6463	-67.7641		5.05391			-65.5483	-65.7919		4.23781			-66.4356	-65.8635		6.26318
	-65.8376	-66.162		5.27323			-67.6485	-67.764		4.4212			-65.5468	-65.7934		3.47532			-66.431	-65.8655		6.86998
	-65.8366	-66.1607		5.80199			-67.6504	-67.7633		5.02965			-65.5453	-65.7951		3.14221			-66.4245	-65.8671		7.44961
	-65.8357	-66.1596		6.32545			-67.652	-67.7621		3.75785			-65.5438	-65.797		3.9014			-66.4165	-65.8682		7.95819
	-65.835	-66.1588		6.38334			-67.6532	-67.7605		5.44606			-65.5425	-65.7989		2.71497			-66.4077	-65.869		6.58745
	-65.8345	-66.1582		5.33787			-67.6542	-67.7586		4.99479			-65.5415	-65.8007		3.17785			-66.3987	-65.8694		7.27166
	-65.8341	-66.1577		5.40239			-67.6551	-67.7566		5.15742			-65.541	-65.8024		3.02949			-66.3901	-65.8696		6.763
	-65.8338	-66.1575		6.19833			-67.6559	-67.7544		4.32391			-65.5409	-65.804		2.95105			-66.3823	-65.8696		6.48436
	-65.8337	-66.1573		6.74227			-67.6567	-67.7523		5.01949			-65.5415	-65.8053		2.65624			-66.3758	-65.8695		6.65758
	-65.8337	-66.1572		6.35746			-67.6575	-67.7503		5.33127			-65.5428	-65.8064		3.3093			-66.3707	-65.8692		7.41391
	-65.8337	-66.157		3.95806			-67.6583	-67.7484		4.80069			-65.5448	-65.8072		3.51562			-66.3672	-65.8686		7.12493
	-65.834	-66.1568		5.39832			-67.659	-67.7467		5.04712			-65.5475	-65.8076		4.03972			-66.3651	-65.8679		6.47135
	-65.8343	-66.1565		5.87593			-67.6598	-67.7452		4.89522			-65.5509	-65.8077		3.91618			-66.3644	-65.8668		7.5524
	-65.8347	-66.1561		6.20659			-67.6605	-67.7439		5.42518			-65.5549	-65.8075		2.86398			-66.3649	-65.8654		6.03353
	-65.8352	-66.1554		5.46623			-67.661	-67.7427		5.50649			-65.5593	-65.8069		4.18884			-66.3663	-65.8638		6.97458
	-65.8358	-66.1546		5.04188			-67.6614	-67.7416		4.24522			-65.564	-65.8059		3.5286			-66.3685	-65.8621		6.57209
	-65.8365	-66.1535		5.9915			-67.6614	-67.7406		5.53126			-65.569	-65.8045		4.3967			-66.3712	-65.8606		6.26909
	-65.8372	-66.1522		5.5161			-67.6612	-67.7395		5.48572			-65.5739	-65.8028		3.41832			-66.3742	-65.8595		6.20103
	-65.838	-66.1508		5.19666			-67.6606	-67.7383		5.42686			-65.5788	-65.8008		3.41757			-66.3773	-65.8591		6.89324
	-65.8387	-66.1492		6.17513			-67.6598	-67.7369		4.69803			-65.5834	-65.7985		3.55648			-66.3802	-65.8597		5.11964
	-65.8394	-66.1475		5.60529			-67.6586	-67.7354		3.99511			-65.5876	-65.7961		3.47671			-66.3829	-65.8614		6.81392
	-65.8401	-66.1458		6.16756			-67.6571	-67.7336		4.96082			-65.5914	-65.7936		2.89464			-66.3854	-65.8643		6.18235
	-65.8407	-66.1441		6.14777			-67.6555	-67.7315		5.29267			-65.5948	-65.7912		3.23802			-66.3875	-65.8685		6.6458
	-65.8413	-66.1424		4.14716			-67.6537	-67.7292		5.95361			-65.5977	-65.789		3.36368			-66.3892	-65.8738		6.01564
	-65.842	-66.1408		4.98329			-67.6519	-67.7266		5.62657			-65.6001	-65.787		3.41511			-66.3907	-65.8798		6.35219
	-65.8426	-66.1394		5.45698			-67.6501	-67.7238		4.68878			-65.6021	-65.7854		3.54229			-66.392	-65.8862		6.48134
	-65.8433	-66.138		5.44732			-67.6484	-67.7209		5.43867			-65.6036	-65.7843		3.29506			-66.3932	-65.8925		5.92204
	-65.844	-66.1367		5.96324			-67.6469	-67.7179		5.53724			-65.6048	-65.7838		3.71919			-66.3943	-65.8982		6.81835
	-65.8449	-66.1356		6.00093			-67.6455	-67.7147		5.45581			-65.6057	-65.7837		3.2981			-66.3954	-65.903		7.20399
	-65.8459	-66.1345		5.12213			-67.6444	-67.7116		5.46032			-65.6064	-65.7842		3.17946			-66.3964	-65.9065		7.19759
	-65.8471	-66.1335		6.24273			-67.6435	-67.7084		5.20715			-65.6068	-65.785		3.33217			-66.3975	-65.9086		6.12715
	-65.8485	-66.1325		4.84099			-67.6428	-67.7053		5.49253			-65.6071	-65.7862		3.41584			-66.3987	-65.9091		6.15638
	-65.8501	-66.1316		5.90784			-67.6423	-67.7022		5.06281			-65.6072	-65.7876		3.28728			-66.3999	-65.9082		5.69035
	-65.8517	-66.1306		6.62192			-67.642	-67.6992		6.14642			-65.6072	-65.789		3.10118			-66.4013	-65.9062		6.24037
	-65.8536	-66.1297		7.1224			-67.6419	-67.6963		5.3271			-65.6072	-65.7902		2.90474			-66.4028	-65.9034		7.65626
	-65.8555	-66.1289					-67.6419	-67.6935		4.74177			-65.6071	-65.7912		4.04389			-66.4045	-65.9003		5.86686
	-65.8574	-66.1281					-67.6422	-67.691					-65.6069	-65.7917					-66.4064	-65.8972
	-65.8594	-66.1273					-67.6426	-67.6886					-65.6068	-65.7918					-66.4085	-65.8944
	-65.8612	-66.1267					-67.6432	-67.6865					-65.6066	-65.7912					-66.4106	-65.8923
	-65.8629	-66.1261					-67.644	-67.6846					-65.6066	-65.7901					-66.4124	-65.8909
	-65.8644	-66.1257					-67.6448	-67.6831					-65.6065	-65.7884					-66.4137	-65.8902
	-65.8657	-66.1254					-67.6456	-67.6819					-65.6066	-65.7861					-66.4142	-65.8904
	-65.8667	-66.1253					-67.6465	-67.6811					-65.6067	-65.7836					-66.4137	-65.8913
	-65.8675	-66.1252					-67.6472	-67.6807					-65.6069	-65.7808					-66.412	-65.8929
	-65.8679	-66.1253					-67.6477	-67.6807					-65.6071	-65.7779					-66.409	-65.8953
	-65.8681	-66.1255					-67.648	-67.681					-65.6074	-65.7752					-66.4048	-65.8984
	-65.868	-66.1257					-67.6479	-67.6818					-65.6076	-65.7728					-66.3995	-65.9022
	-65.8677	-66.1261					-67.6474	-67.6829					-65.6077	-65.7708					-66.3934	-65.9067
	-65.8672	-66.1265					-67.6465	-67.6843					-65.6077	-65.7693					-66.3868	-65.9119
	-65.8666	-66.127					-67.6452	-67.686					-65.6074	-65.7685					-66.3799	-65.9177
	-65.8658	-66.1276					-67.6436	-67.6879					-65.6069	-65.7683					-66.3731	-65.9238
	-65.865	-66.1283					-67.6417	-67.69					-65.6059	-65.7687					-66.3665	-65.9302
	-65.8641	-66.129					-67.6396	-67.6923					-65.6047	-65.7696					-66.3603	-65.9364
	-65.8632	-66.1298					-67.6374	-67.6945					-65.603	-65.7709					-66.3547	-65.9424
	-65.8623	-66.1306					-67.6352	-67.6967					-65.6009	-65.7725					-66.3496	-65.9478
	-65.8613	-66.1315					-67.6332	-67.6988					-65.5985	-65.7743					-66.3451	-65.9525
	-65.8602	-66.1323					-67.6315	-67.7007					-65.5958	-65.776					-66.3412	-65.9564
	-65.8591	-66.1331					-67.6301	-67.7023					-65.5929	-65.7776					-66.3379	-65.9594
	-65.8578	-66.1339					-67.6291	-67.7036					-65.5898	-65.7789					-66.3352	-65.9615
	-65.8564	-66.1346					-67.6284	-67.7046					-65.5867	-65.7799					-66.3335	-65.9626
	-65.8548	-66.1351					-67.6282	-67.7052					-65.5836	-65.7804					-66.3327	-65.9628
	-65.8531	-66.1356					-67.6283	-67.7055					-65.5807	-65.7806					-66.3331	-65.9622
	-65.8512	-66.1359					-67.6287	-67.7055					-65.578	-65.7803					-66.3347	-65.9608
	-65.8492	-66.136					-67.6294	-67.7052					-65.5756	-65.7797					-66.3378	-65.9586
	-65.8471	-66.136					-67.6303	-67.7048					-65.5734	-65.7788					-66.3422	-65.9557
	-65.8448	-66.1359					-67.6314	-67.7043					-65.5716	-65.7777					-66.3476	-65.952
	-65.8424	-66.1355					-67.6326	-67.7038					-65.5701	-65.7765					-66.354	-65.9477
	-65.84	-66.135					-67.634	-67.7035					-65.5688	-65.7753					-66.3607	-65.9429
	-65.8376	-66.1343					-67.6354	-67.7035					-65.5678	-65.7741					-66.3673	-65.9375
	-65.8353	-66.1335					-67.6371	-67.7038					-65.5669	-65.7731					-66.3734	-65.9318
	-65.833	-66.1325					-67.6388	-67.7045					-65.566	-65.7723					-66.3786	-65.926
	-65.8309	-66.1313					-67.6408	-67.7057					-65.5652	-65.7717					-66.3825	-65.9202
	-65.829	-66.1301					-67.643	-67.7074					-65.5643	-65.7714					-66.3849	-65.9145
	-65.8273	-66.1288					-67.6453	-67.7096					-65.5633	-65.7714					-66.3858	-65.9092
	-65.8259	-66.1274					-67.6479	-67.7122					-65.5622	-65.7715					-66.385	-65.9044
	-65.8247	-66.126					-67.6505	-67.7151					-65.561	-65.7719					-66.3828	-65.9002
	-65.8239	-66.1246					-67.6533	-67.7183					-65.5598	-65.7725					-66.3793	-65.8968
	-65.8235	-66.1233					-67.6561	-67.7216					-65.5585	-65.7732					-66.3746	-65.8941
	-65.8233	-66.122					-67.6589	-67.725					-65.5573	-65.7741					-66.3691	-65.8924
	-65.8235	-66.1209					-67.6615	-67.7281					-65.5562	-65.775					-66.3629	-65.8917
	-65.8239	-66.1199					-67.6639	-67.7309					-65.5553	-65.7761					-66.3562	-65.892
	-65.8247	-66.119					-67.6661	-67.7332					-65.5547	-65.7773					-66.3492	-65.8932
	-65.8256	-66.1184					-67.668	-67.7349					-65.5544	-65.7786					-66.3421	-65.8953
	-65.8268	-66.1179					-67.6696	-67.7359					-65.5544	-65.7801					-66.3352	-65.898
	-65.8281	-66.1176					-67.6708	-67.7362					-65.5547	-65.7816					-66.3287	-65.9013
	-65.8296	-66.1175					-67.6718	-67.7357					-65.5553	-65.7832					-66.3227	-65.9048
	-65.8313	-66.1177					-67.6724	-67.7345					-65.5563	-65.7849					-66.3175	-65.9084
	-65.8332	-66.118					-67.6729	-67.7326					-65.5575	-65.7866					-66.3131	-65.9119
	-65.8353	-66.1185					-67.6732	-67.7301					-65.5589	-65.7883					-66.3095	-65.9152
	-65.8377	-66.1193					-67.6733	-67.7272					-65.5603	-65.79					-66.3067	-65.9181
	-65.8403	-66.1203					-67.6734	-67.724					-65.5619	-65.7915					-66.3044	-65.9204
	-65.8432	-66.1216					-67.6734	-67.7207					-65.5634	-65.793					-66.3026	-65.9223
	-65.8463	-66.1232					-67.6734	-67.7174					-65.5648	-65.7942					-66.3008	-65.9235
	-65.8497	-66.1249					-67.6735	-67.7141					-65.5661	-65.7953					-66.299	-65.924
	-65.8533	-66.1269					-67.6736	-67.7111					-65.5673	-65.7961					-66.297	-65.9238
	-65.857	-66.1291					-67.6737	-67.7083					-65.5684	-65.7967					-66.295	-65.923
	-65.8608	-66.1314					-67.6738	-67.7059					-65.5694	-65.7971					-66.2932	-65.9217
	-65.8646	-66.1338					-67.674	-67.7037					-65.5704	-65.7973					-66.2919	-65.9199
	-65.8684	-66.1362					-67.674	-67.7019					-65.5714	-65.7973					-66.2915	-65.918
	-65.8719	-66.1385					-67.674	-67.7003					-65.5725	-65.7972					-66.2925	-65.9163
	-65.8752	-66.1407					-67.6738	-67.6989					-65.5739	-65.797					-66.2953	-65.9149
	-65.8782	-66.1426					-67.6735	-67.6976					-65.5755	-65.7966					-66.3	-65.9141
	-65.8808	-66.1442					-67.6728	-67.6965					-65.5776	-65.7961					-66.3066	-65.914
	-65.8829	-66.1455					-67.6719	-67.6954					-65.58	-65.7954					-66.3148	-65.9147
	-65.8847	-66.1464					-67.6706	-67.6944					-65.5828	-65.7945					-66.3242	-65.916
	-65.8861	-66.147					-67.669	-67.6934					-65.5861	-65.7935					-66.3342	-65.918
	-65.887	-66.1472					-67.6671	-67.6925					-65.5897	-65.7923					-66.3441	-65.9204
	-65.8876	-66.1471					-67.6649	-67.6916					-65.5937	-65.7909					-66.3535	-65.9232
	-65.8879	-66.1467					-67.6625	-67.6908					-65.5979	-65.7894					-66.3617	-65.9263
	-65.8879	-66.1462					-67.66	-67.69					-65.6022	-65.7877					-66.3687	-65.9297
	-65.8877	-66.1455					-67.6576	-67.6893					-65.6065	-65.7859					-66.3742	-65.9333
	-65.8873	-66.1447					-67.6552	-67.6887					-65.6107	-65.784					-66.3784	-65.9371
	-65.8869	-66.144					-67.6531	-67.6882					-65.6147	-65.7822					-66.3814	-65.9411
	-65.8864	-66.1433					-67.6514	-67.6877					-65.6183	-65.7806					-66.3834	-65.9452
	-65.8859	-66.1428					-67.6502	-67.6873					-65.6215	-65.7792					-66.3848	-65.9492
	-65.8855	-66.1425					-67.6495	-67.6868					-65.6241	-65.778					-66.3855	-65.953
	-65.8851	-66.1425					-67.6494	-67.6864					-65.6262	-65.7772					-66.3857	-65.9563
	-65.8849	-66.1427					-67.65	-67.6858					-65.6276	-65.7767					-66.3853	-65.9591
	-65.8848	-66.1432					-67.6512	-67.6851					-65.6284	-65.7767					-66.3842	-65.9611
	-65.8849	-66.1441					-67.6531	-67.6842					-65.6286	-65.7769					-66.3823	-65.9623
	-65.8851	-66.1453					-67.6555	-67.6831					-65.6281	-65.7776					-66.3793	-65.9627
	-65.8854	-66.1468					-67.6585	-67.6817					-65.6271	-65.7784					-66.3753	-65.9625
	-65.8858	-66.1486					-67.662	-67.6801					-65.6257	-65.7795					-66.3703	-65.9616
	-65.8863	-66.1508					-67.6659	-67.6782					-65.6238	-65.7808					-66.3645	-65.9604
	-65.8868	-66.1531					-67.6701	-67.6761					-65.6217	-65.7822					-66.3582	-65.959
	-65.8873	-66.1556					-67.6746	-67.6737					-65.6193	-65.7836					-66.3519	-65.9574
	-65.8877	-66.1583					-67.6792	-67.6712					-65.6169	-65.7852					-66.3459	-65.9558
	-65.888	-66.161					-67.684	-67.6685					-65.6144	-65.7868					-66.3407	-65.954
	-65.8881	-66.1638					-67.6888	-67.6657					-65.612	-65.7884					-66.3364	-65.9521
	-65.8881	-66.1665					-67.6936	-67.663					-65.6097	-65.7902					-66.3333	-65.9499
	-65.8879	-66.169					-67.6982	-67.6603					-65.6076	-65.7921					-66.3314	-65.9471
	-65.8875	-66.1715					-67.7027	-67.6578					-65.6056	-65.7941					-66.3305	-65.9437
	-65.8868	-66.1737					-67.7071	-67.6556					-65.6037	-65.7961					-66.3305	-65.9395
	-65.8861	-66.1757					-67.7112	-67.6536					-65.6019	-65.7982					-66.3311	-65.9346
	-65.8852	-66.1774					-67.715	-67.652					-65.6003	-65.8004					-66.332	-65.9291
	-65.8842	-66.1788					-67.7186	-67.6509					-65.5986	-65.8024					-66.3333	-65.9232
	-65.8831	-66.1799					-67.7219	-67.6502					-65.597	-65.8044					-66.3347	-65.9171
	-65.882	-66.1807					-67.7249	-67.6501					-65.5953	-65.8061					-66.3362	-65.9113
	-65.881	-66.1813					-67.7276	-67.6505					-65.5937	-65.8075					-66.3378	-65.9058
	-65.88	-66.1816					-67.73	-67.6514					-65.5919	-65.8086					-66.3396	-65.901
	-65.8791	-66.1817					-67.7321	-67.6529					-65.5902	-65.8094					-66.3417	-65.8969
	-65.8784	-66.1816					-67.7339	-67.655					-65.5884	-65.8098					-66.344	-65.8935
	-65.8779	-66.1814					-67.7353	-67.6575					-65.5866	-65.8099					-66.3466	-65.8908
	-65.8777	-66.1811					-67.7362	-67.6605					-65.5849	-65.8097					-66.3497	-65.8885
	-65.8777	-66.1807					-67.7367	-67.6638					-65.5833	-65.8094					-66.3532	-65.8865
	-65.8779	-66.1803					-67.7367	-67.6673					-65.5817	-65.809					-66.357	-65.8847
	-65.8785	-66.18					-67.7362	-67.671					-65.5803	-65.8087					-66.3612	-65.8829
	-65.8794	-66.1796					-67.7351	-67.6747					-65.5791	-65.8086					-66.3655	-65.8811
	-65.8806	-66.1794					-67.7334	-67.6782					-65.5782	-65.8087					-66.3698	-65.8792
	-65.8822	-66.1792					-67.7312	-67.6815					-65.5775	-65.8093					-66.3738	-65.8774
	-65.8839	-66.1791					-67.7286	-67.6845					-65.5772	-65.8103					-66.3775	-65.8756
	-65.886	-66.1791					-67.7255	-67.687					-65.5773	-65.8118					-66.3804	-65.874
	-65.8882	-66.1792					-67.7221	-67.6891					-65.5778	-65.8137					-66.3825	-65.8726
	-65.8907	-66.1794					-67.7184	-67.6905					-65.5788	-65.8162					-66.3836	-65.8714
	-65.8932	-66.1796					-67.7146	-67.6914					-65.5802	-65.8191					-66.3836	-65.8704
	-65.8958	-66.1799					-67.7109	-67.6918					-65.5821	-65.8223					-66.3825	-65.8697
	-65.8985	-66.1803					-67.7072	-67.6917					-65.5844	-65.8258					-66.3805	-65.8691
	-65.901	-66.1806					-67.7039	-67.6912					-65.587	-65.8294					-66.3778	-65.8686
	-65.9035	-66.1808					-67.7008	-67.6903					-65.5899	-65.8331					-66.3745	-65.8683
	-65.9058	-66.181					-67.6982	-67.6893					-65.593	-65.8368					-66.371	-65.8681
	-65.9079	-66.1809					-67.6961	-67.6881					-65.5961	-65.8404					-66.3673	-65.868
	-65.9097	-66.1807					-67.6945	-67.6871					-65.5993	-65.8438					-66.3636	-65.8683
	-65.9111	-66.1803					-67.6935	-67.6861					-65.6025	-65.8471					-66.36	-65.8689
	-65.9123	-66.1796					-67.6932	-67.6855					-65.6055	-65.8501					-66.3564	-65.8699
	-65.9131	-66.1786					-67.6933	-67.6852					-65.6083	-65.8528					-66.3529	-65.8713
	-65.9135	-66.1774					-67.6941	-67.6853					-65.6108	-65.8553					-66.3493	-65.8732
	-65.9135	-66.1759					-67.6953	-67.6858					-65.6131	-65.8575					-66.3458	-65.8754
	-65.9133	-66.1743					-67.6968	-67.6868					-65.615	-65.8594					-66.3423	-65.8778
	-65.9127	-66.1725					-67.6987	-67.6882					-65.6167	-65.861					-66.3391	-65.8803
	-65.9119	-66.1708					-67.7007	-67.6898					-65.6181	-65.8621					-66.3363	-65.8826
	-65.911	-66.1691					-67.7027	-67.6918					-65.6193	-65.8629					-66.3342	-65.8847
	-65.91	-66.1675					-67.7048	-67.6938					-65.6202	-65.8631					-66.3328	-65.8863
	-65.9091	-66.1663					-67.7067	-67.6959					-65.6208	-65.8628					-66.3324	-65.8874
	-65.9083	-66.1653					-67.7085	-67.698					-65.6213	-65.862					-66.333	-65.8878
	-65.9077	-66.1648					-67.71	-67.6999					-65.6216	-65.8605					-66.3345	-65.8875
	-65.9074	-66.1647					-67.7112	-67.7016					-65.6217	-65.8584					-66.3369	-65.8865
	-65.9074	-66.165					-67.7123	-67.703					-65.6217	-65.8557					-66.3399	-65.8847
	-65.9078	-66.1659					-67.7131	-67.704					-65.6215	-65.8524					-66.3434	-65.8823
	-65.9085	-66.1672					-67.7138	-67.7047					-65.6212	-65.8486					-66.3471	-65.8795
	-65.9096	-66.1688					-67.7144	-67.7049					-65.6209	-65.8443					-66.3507	-65.8765
	-65.911	-66.1709					-67.7149	-67.7048					-65.6204	-65.8397					-66.3542	-65.8737
	-65.9127	-66.1732					-67.7155	-67.7043					-65.6199	-65.8349					-66.3574	-65.8714
	-65.9145	-66.1756					-67.7161	-67.7035					-65.6193	-65.83					-66.3602	-65.87
	-65.9165	-66.1782					-67.7169	-67.7024					-65.6186	-65.8251					-66.3625	-65.8699
	-65.9184	-66.1808					-67.7179	-67.7011					-65.6179	-65.8202					-66.3643	-65.8711
	-65.9204	-66.1833					-67.719	-67.6997					-65.6172	-65.8154					-66.3657	-65.8738
	-65.9222	-66.1856					-67.7203	-67.6981					-65.6164	-65.8109					-66.3665	-65.8779
	-65.9238	-66.1878					-67.7218	-67.6965					-65.6154	-65.8066					-66.3669	-65.883
	-65.9251	-66.1898					-67.7234	-67.6949					-65.6144	-65.8025					-66.3669	-65.889
	-65.9262	-66.1915					-67.725	-67.6933					-65.6132	-65.7987					-66.3664	-65.8953
	-65.9269	-66.193					-67.7268	-67.6919					-65.6117	-65.795					-66.3658	-65.9016
	-65.9273	-66.1942					-67.7285	-67.6906					-65.6101	-65.7916					-66.365	-65.9076
	-65.9272	-66.1951					-67.7301	-67.6895					-65.6082	-65.7883					-66.3643	-65.9131
	-65.9268	-66.1958					-67.7316	-67.6885					-65.606	-65.7852					-66.3636	-65.9181
	-65.9259	-66.1962					-67.733	-67.6877					-65.6036	-65.7823					-66.3633	-65.9225
	-65.9246	-66.1963					-67.7341	-67.6871					-65.601	-65.7795					-66.3632	-65.9266
	-65.923	-66.1961					-67.7349	-67.6866					-65.5982	-65.7768					-66.3635	-65.9303
	-65.921	-66.1956					-67.7356	-67.6862					-65.5953	-65.7744					-66.364	-65.934
	-65.9188	-66.1947					-67.7359	-67.6859					-65.5925	-65.7721					-66.3648	-65.9376
	-65.9164	-66.1934					-67.7361	-67.6858					-65.5897	-65.7701					-66.3658	-65.9413
	-65.9141	-66.1918					-67.736	-67.6857					-65.5872	-65.7683					-66.367	-65.9451
	-65.9118	-66.1898					-67.7358	-67.6857					-65.5851	-65.7668					-66.3683	-65.9488
	-65.9097	-66.1876					-67.7356	-67.6858					-65.5833	-65.7657					-66.3698	-65.9525
	-65.9081	-66.185					-67.7353	-67.6859					-65.5822	-65.7648					-66.3713	-65.9558
	-65.9069	-66.1823					-67.7351	-67.6862					-65.5816	-65.7643					-66.3728	-65.9587
	-65.9063	-66.1794					-67.7351	-67.6866					-65.5817	-65.7641					-66.3739	-65.9609
	-65.9064	-66.1765					-67.7351	-67.6871					-65.5825	-65.7642					-66.3746	-65.9623
	-65.9072	-66.1737					-67.7353	-67.6879					-65.584	-65.7646					-66.3745	-65.9628
	-65.9087	-66.1711					-67.7355	-67.6888					-65.586	-65.7653					-66.3734	-65.9623
	-65.9108	-66.1687					-67.7358	-67.6898					-65.5885	-65.7663					-66.3714	-65.961
	-65.9135	-66.1666					-67.7361	-67.691					-65.5915	-65.7675					-66.3682	-65.9589
	-65.9166	-66.1649					-67.7362	-67.6923					-65.5948	-65.7689					-66.3641	-65.9562
	-65.92	-66.1637					-67.7361	-67.6936					-65.5984	-65.7705					-66.3592	-65.9531
	-65.9236	-66.1629					-67.7357	-67.6948					-65.6021	-65.7722					-66.3538	-65.9497
	-65.9271	-66.1624					-67.7349	-67.6959					-65.6057	-65.7741					-66.3482	-65.9463
	-65.9304	-66.1624					-67.7336	-67.6968					-65.6093	-65.7761					-66.3428	-65.9428
	-65.9335	-66.1627					-67.7319	-67.6973					-65.6126	-65.7782					-66.3378	-65.9394
	-65.9361	-66.1633					-67.7298	-67.6973					-65.6158	-65.7805					-66.3334	-65.9363
	-65.9384	-66.164					-67.7272	-67.6967					-65.6187	-65.7827					-66.3297	-65.9334
	-65.9402	-66.1649					-67.7244	-67.6955					-65.6214	-65.785					-66.327	-65.9309
	-65.9415	-66.1658					-67.7215	-67.6937					-65.6238	-65.7873					-66.3251	-65.9286
	-65.9425	-66.1667					-67.7185	-67.6912					-65.626	-65.7896					-66.324	-65.9267
	-65.9431	-66.1676					-67.7158	-67.688					-65.6281	-65.7917					-66.3238	-65.925
	-65.9435	-66.1683					-67.7134	-67.6842					-65.63	-65.7937					-66.324	-65.9234
	-65.9438	-66.1689					-67.7116	-67.68					-65.6319	-65.7956					-66.3247	-65.9216
	-65.944	-66.1693					-67.7104	-67.6753					-65.6338	-65.7974					-66.3255	-65.9195
	-65.9443	-66.1695					-67.7099	-67.6705					-65.6357	-65.799					-66.3262	-65.9168
	-65.9445	-66.1696					-67.7102	-67.6655					-65.6376	-65.8004					-66.3266	-65.9134
	-65.9448	-66.1695					-67.7113	-67.6607					-65.6395	-65.8018					-66.3266	-65.9092
	-65.9452	-66.1693					-67.7131	-67.6562					-65.6413	-65.8032					-66.3261	-65.9042
	-65.9455	-66.1689					-67.7156	-67.6522					-65.643	-65.8046					-66.3253	-65.8985
	-65.9458	-66.1684					-67.7185	-67.6488					-65.6445	-65.8061					-66.3242	-65.8924
	-65.946	-66.1678					-67.7217	-67.6464					-65.6455	-65.8077					-66.3231	-65.8863
	-65.9459	-66.1671					-67.725	-67.6449					-65.6462	-65.8094					-66.322	-65.8805
	-65.9456	-66.1664					-67.7282	-67.6445					-65.6463	-65.8112					-66.3212	-65.8755
	-65.945	-66.1655					-67.7312	-67.6453					-65.6458	-65.8132					-66.3206	-65.8714
	-65.9441	-66.1646					-67.7337	-67.6472					-65.6447	-65.8151					-66.3203	-65.8685
	-65.9428	-66.1638					-67.7357	-67.6502					-65.643	-65.817					-66.3202	-65.8669
	-65.9411	-66.1629					-67.737	-67.6542					-65.6407	-65.8188					-66.3201	-65.8666
	-65.9392	-66.162					-67.7377	-67.6591					-65.6379	-65.8203					-66.32	-65.8675
	-65.9371	-66.1612					-67.7377	-67.6647					-65.6348	-65.8216					-66.3196	-65.8693
	-65.9348	-66.1604					-67.7371	-67.6708					-65.6314	-65.8226					-66.319	-65.8717
	-65.9325	-66.1598					-67.7361	-67.6771					-65.628	-65.8232					-66.318	-65.8745
	-65.9301	-66.1593					-67.7347	-67.6836					-65.6246	-65.8235					-66.3168	-65.8774
	-65.9278	-66.159					-67.7331	-67.6898					-65.6215	-65.8234					-66.3154	-65.88
	-65.9257	-66.1587					-67.7315	-67.6957					-65.6187	-65.8231					-66.3139	-65.8822
	-65.9237	-66.1587					-67.73	-67.7011					-65.6164	-65.8225					-66.3122	-65.8838
	-65.9219	-66.1587					-67.7287	-67.7057					-65.6145	-65.8217					-66.3106	-65.8848
	-65.9203	-66.1588					-67.7278	-67.7095					-65.6131	-65.8207					-66.3088	-65.8851
	-65.9188	-66.159					-67.7272	-67.7124					-65.6122	-65.8196					-66.3067	-65.885
	-65.9174	-66.1592					-67.7271	-67.7143					-65.6118	-65.8184					-66.3044	-65.8846
	-65.9161	-66.1593					-67.7275	-67.7152					-65.6117	-65.8171					-66.3017	-65.884
	-65.9148	-66.1592					-67.7283	-67.7151					-65.6119	-65.8156					-66.2988	-65.8837
	-65.9134	-66.159					-67.7294	-67.7141					-65.6124	-65.814					-66.2957	-65.8836
	-65.912	-66.1585					-67.7309	-67.7121					-65.6129	-65.8123					-66.2928	-65.884
	-65.9104	-66.1578					-67.7327	-67.7093					-65.6134	-65.8104					-66.2903	-65.8849
	-65.9088	-66.1568					-67.7346	-67.7058					-65.6138	-65.8083					-66.2889	-65.8865
	-65.907	-66.1555					-67.7366	-67.7016					-65.6141	-65.806					-66.2888	-65.8886
	-65.9052	-66.1539					-67.7386	-67.6971					-65.6142	-65.8036					-66.2904	-65.8913
	-65.9033	-66.1521					-67.7406	-67.6922					-65.614	-65.8009					-66.2941	-65.8944
	-65.9014	-66.1502					-67.7425	-67.6873					-65.6135	-65.7982					-66.2998	-65.8979
	-65.8995	-66.1481					-67.7444	-67.6824					-65.6128	-65.7953					-66.3075	-65.9018
	-65.8976	-66.1459					-67.7462	-67.6778					-65.6117	-65.7925					-66.3169	-65.906
	-65.8959	-66.1438					-67.748	-67.6736					-65.6104	-65.7897					-66.3273	-65.9105
	-65.8943	-66.1418					-67.7498	-67.67					-65.6089	-65.787					-66.3384	-65.9153
	-65.8928	-66.1398					-67.7516	-67.6671					-65.6072	-65.7847					-66.3493	-65.9203
	-65.8915	-66.1381					-67.7536	-67.6649					-65.6055	-65.7827					-66.3592	-65.9254
	-65.8904	-66.1365					-67.7558	-67.6635					-65.6036	-65.7811					-66.3676	-65.9305
	-65.8896	-66.1351					-67.7582	-67.663					-65.6018	-65.7802					-66.3738	-65.9355
	-65.8889	-66.1339					-67.7609	-67.6632					-65.6001	-65.7798					-66.3773	-65.9401
	-65.8886	-66.133					-67.7638	-67.6642					-65.5985	-65.7801					-66.378	-65.9444
	-65.8884	-66.1321					-67.7669	-67.6657					-65.597	-65.781					-66.3759	-65.9481
	-65.8886	-66.1314					-67.7701	-67.6678					-65.5958	-65.7825					-66.3712	-65.9512
	-65.889	-66.1307					-67.7735	-67.6701					-65.5947	-65.7844					-66.3644	-65.9537
	-65.8897	-66.1301					-67.7769	-67.6725					-65.5938	-65.7868					-66.3561	-65.9555
	-65.8906	-66.1295					-67.7803	-67.6748					-65.5931	-65.7895					-66.3471	-65.9567
	-65.8917	-66.129					-67.7834	-67.677					-65.5925	-65.7922					-66.3382	-65.9572
	-65.8929	-66.1283					-67.7864	-67.6788					-65.592	-65.7949					-66.3302	-65.9571
	-65.8941	-66.1277					-67.7891	-67.6802					-65.5915	-65.7974					-66.3235	-65.9561
	-65.8953	-66.1272					-67.7914	-67.681					-65.591	-65.7995					-66.3187	-65.9543
	-65.8963	-66.1266					-67.7932	-67.6814					-65.5904	-65.8013					-66.3159	-65.9515
	-65.8971	-66.1262					-67.7946	-67.6812					-65.5897	-65.8026					-66.3153	-65.9477
	-65.8976	-66.126					-67.7955	-67.6806					-65.589	-65.8035					-66.3166	-65.9429
	-65.8977	-66.1259					-67.7959	-67.6797					-65.5881	-65.8039					-66.3197	-65.9371
	-65.8974	-66.1261					-67.7958	-67.6785					-65.5872	-65.804					-66.3242	-65.9306
	-65.8967	-66.1265					-67.7953	-67.6771					-65.5862	-65.8039					-66.3295	-65.9237
	-65.8955	-66.1272					-67.7943	-67.6758					-65.5852	-65.8037					-66.3353	-65.9166
	-65.894	-66.1283					-67.7929	-67.6746					-65.5842	-65.8036					-66.341	-65.9098
	-65.8922	-66.1296					-67.7913	-67.6735					-65.5833	-65.8036					-66.3461	-65.9037
	-65.8901	-66.1313					-67.7893	-67.6728					-65.5825	-65.8039					-66.35	-65.8986
	-65.8879	-66.1332					-67.7872	-67.6724					-65.5819	-65.8046					-66.3525	-65.8948
	-65.8857	-66.1353					-67.785	-67.6723					-65.5815	-65.8058					-66.3534	-65.8925
	-65.8835	-66.1376					-67.7827	-67.6726					-65.5814	-65.8074					-66.3524	-65.8917
	-65.8815	-66.1401					-67.7804	-67.6732					-65.5816	-65.8094					-66.3498	-65.8924
	-65.8797	-66.1425					-67.7782	-67.6741					-65.5821	-65.8119					-66.3458	-65.8943
	-65.8783	-66.145					-67.7761	-67.6752					-65.5831	-65.8146					-66.3407	-65.8971
	-65.8772	-66.1474					-67.7741	-67.6765					-65.5844	-65.8175					-66.3349	-65.9004
	-65.8764	-66.1497					-67.7723	-67.678					-65.5862	-65.8204					-66.329	-65.9039
	-65.8761	-66.1518					-67.7706	-67.6795					-65.5885	-65.8234					-66.3232	-65.9072
	-65.8761	-66.1537					-67.7689	-67.6811					-65.5911	-65.8262					-66.318	-65.9101
	-65.8765	-66.1555					-67.7674	-67.6827					-65.5941	-65.8288					-66.3135	-65.9125
	-65.8771	-66.157					-67.766	-67.6843					-65.5974	-65.831					-66.3101	-65.9144
	-65.8779	-66.1583					-67.7646	-67.6859					-65.6008	-65.8329					-66.3078	-65.9157
	-65.8789	-66.1594					-67.7634	-67.6875					-65.6043	-65.8344					-66.3066	-65.9167
	-65.88	-66.1604					-67.7624	-67.6891					-65.6078	-65.8355					-66.3065	-65.9174
	-65.881	-66.1613					-67.7617	-67.6907					-65.6112	-65.8362					-66.3076	-65.918
	-65.8819	-66.1621					-67.7612	-67.6922					-65.6142	-65.8366					-66.3096	-65.9186
	-65.8828	-66.163					-67.7612	-67.6938					-65.6168	-65.8368					-66.3125	-65.9192
	-65.8834	-66.1638					-67.7617	-67.6953					-65.6188	-65.8368					-66.3159	-65.9199
	-65.8838	-66.1647					-67.7628	-67.6967					-65.6202	-65.8368					-66.3196	-65.9205
	-65.884	-66.1657					-67.7645	-67.698					-65.6209	-65.8368					-66.3235	-65.9212
	-65.8839	-66.1667					-67.7667	-67.6992					-65.6209	-65.837					-66.3271	-65.9217
	-65.8837	-66.1678					-67.7694	-67.7002					-65.6203	-65.8375					-66.3304	-65.9222
	-65.8833	-66.1689					-67.7725	-67.7009					-65.619	-65.8384					-66.3329	-65.9226
	-65.8827	-66.1701					-67.7759	-67.7014					-65.6172	-65.8397					-66.3345	-65.9229
	-65.8821	-66.1713					-67.7793	-67.7015					-65.615	-65.8415					-66.3351	-65.9232
	-65.8814	-66.1724					-67.7825	-67.7013					-65.6125	-65.8439					-66.3345	-65.9233
	-65.8807	-66.1735					-67.7854	-67.7008					-65.61	-65.8468					-66.3327	-65.9233
	-65.8802	-66.1746					-67.7878	-67.7001					-65.6076	-65.8501					-66.3297	-65.923
	-65.8797	-66.1756					-67.7894	-67.6991					-65.6055	-65.8538					-66.3258	-65.9222
	-65.8795	-66.1765					-67.7901	-67.6979					-65.6037	-65.8578					-66.3211	-65.9208
	-65.8795	-66.1774					-67.7899	-67.6966					-65.6025	-65.862					-66.3159	-65.9187
	-65.8797	-66.1782					-67.7887	-67.6953					-65.6018	-65.8663					-66.3105	-65.9158
	-65.8803	-66.1789					-67.7867	-67.6942					-65.6018	-65.8704					-66.3053	-65.9119
	-65.8813	-66.1796					-67.7839	-67.6931					-65.6023	-65.8744					-66.3005	-65.9073
	-65.8826	-66.1803					-67.7805	-67.6924					-65.6035	-65.8781					-66.2965	-65.902
	-65.8842	-66.181					-67.7766	-67.6919					-65.6051	-65.8814					-66.2935	-65.8962
	-65.8862	-66.1816					-67.7726	-67.6917					-65.6072	-65.8842					-66.2915	-65.8902
	-65.8886	-66.1823					-67.7687	-67.6918					-65.6097	-65.8866					-66.2907	-65.8842
	-65.8911	-66.183					-67.765	-67.6921					-65.6124	-65.8886					-66.2909	-65.8785
	-65.8939	-66.1838					-67.7617	-67.6926					-65.6152	-65.8901					-66.292	-65.8734
	-65.8967	-66.1846					-67.759	-67.6931					-65.618	-65.8911					-66.2937	-65.8689
	-65.8996	-66.1854					-67.7569	-67.6938					-65.6209	-65.8918					-66.2957	-65.8653
	-65.9023	-66.1863					-67.7556	-67.6943					-65.6236	-65.8922					-66.2978	-65.8625
	-65.9049	-66.1873					-67.755	-67.6948					-65.6262	-65.8923					-66.2996	-65.8608
	-65.9072	-66.1884					-67.7551	-67.6951					-65.6286	-65.8923					-66.3008	-65.8602
	-65.9092	-66.1896					-67.7558	-67.6952					-65.6308	-65.8922					-66.3013	-65.8608
	-65.9109	-66.1908					-67.7571	-67.6952					-65.6329	-65.8921					-66.301	-65.8625
	-65.9122	-66.1921					-67.7588	-67.6951					-65.6347	-65.8921					-66.2997	-65.8654
	-65.9131	-66.1934					-67.7608	-67.6949					-65.6363	-65.8923					-66.2975	-65.8694
	-65.9136	-66.1947					-67.763	-67.6947					-65.6378	-65.8927					-66.2944	-65.8744
	-65.9138	-66.1959					-67.7652	-67.6945					-65.6391	-65.8934					-66.2907	-65.8801
	-65.9138	-66.197					-67.7673	-67.6944					-65.6403	-65.8944					-66.2863	-65.8862
	-65.9134	-66.198					-67.7692	-67.6945					-65.6414	-65.8958					-66.2817	-65.8923
	-65.9128	-66.1986					-67.7707	-67.6947					-65.6423	-65.8975					-66.277	-65.8982
	-65.9121	-66.1989					-67.7718	-67.6952					-65.6432	-65.8996					-66.2725	-65.9034
	-65.9112	-66.1988					-67.7723	-67.6958					-65.6441	-65.902					-66.2686	-65.9077
	-65.9102	-66.1983					-67.7723	-67.6966					-65.6449	-65.9046					-66.2655	-65.911
	-65.9091	-66.1974					-67.7716	-67.6975					-65.6458	-65.9074					-66.2637	-65.9133
	-65.908	-66.196					-67.7703	-67.6985					-65.6467	-65.9104					-66.2632	-65.9145
	-65.9069	-66.1942					-67.7685	-67.6994					-65.6476	-65.9134					-66.2641	-65.915
	-65.9059	-66.1921					-67.7662	-67.7003					-65.6486	-65.9163					-66.2664	-65.915
	-65.9051	-66.1898					-67.7635	-67.7011					-65.6497	-65.919					-66.2696	-65.9147
	-65.9044	-66.1873					-67.7605	-67.7017					-65.6507	-65.9215					-66.2735	-65.9145
	-65.9039	-66.1848					-67.7573	-67.702					-65.6518	-65.9236					-66.2773	-65.9144
	-65.9037	-66.1824					-67.7542	-67.7022					-65.6528	-65.9253					-66.2807	-65.9146
	-65.9037	-66.1803					-67.7511	-67.7022					-65.6536	-65.9265					-66.2829	-65.9152
	-65.904	-66.1785					-67.7482	-67.7019					-65.6543	-65.9273					-66.2838	-65.916
	-65.9045	-66.177					-67.7456	-67.7015					-65.6547	-65.9275					-66.283	-65.9168
	-65.9053	-66.1761					-67.7434	-67.7011					-65.6549	-65.9274					-66.2806	-65.9176
	-65.9062	-66.1756					-67.7416	-67.7006					-65.6548	-65.9268					-66.277	-65.9181
	-65.9072	-66.1756					-67.7401	-67.7003					-65.6545	-65.9259					-66.2726	-65.9181
	-65.9083	-66.1761					-67.7391	-67.7001					-65.6539	-65.9247					-66.2679	-65.9175
	-65.9094	-66.1769					-67.7384	-67.7002					-65.6531	-65.9234					-66.2637	-65.9162
	-65.9104	-66.1781					-67.7381	-67.7007					-65.6523	-65.9218					-66.2605	-65.9143
	-65.9112	-66.1795					-67.7381	-67.7016					-65.6514	-65.9202					-66.2588	-65.9119
	-65.9119	-66.181					-67.7383	-67.7029					-65.6505	-65.9186					-66.2589	-65.9092
	-65.9123	-66.1826					-67.7388	-67.7046					-65.6498	-65.9169					-66.2609	-65.9065
	-65.9125	-66.1842					-67.7396	-67.7068					-65.6494	-65.9152					-66.265	-65.9041
	-65.9125	-66.1857					-67.7404	-67.7093					-65.6492	-65.9136					-66.2711	-65.9025
	-65.9124	-66.1871					-67.7414	-67.712					-65.6494	-65.912					-66.2788	-65.9019
	-65.9121	-66.1884					-67.7426	-67.7149					-65.6501	-65.9104					-66.288	-65.9026
	-65.9116	-66.1896					-67.7438	-67.7179					-65.6512	-65.9089					-66.2983	-65.9046
	-65.9112	-66.1906					-67.745	-67.7208					-65.6528	-65.9074					-66.3093	-65.9078
	-65.9108	-66.1915					-67.7464	-67.7235					-65.6547	-65.9061					-66.3206	-65.9121
	-65.9105	-66.1923					-67.7477	-67.7259					-65.6571	-65.9048					-66.3317	-65.9168
	-65.9104	-66.193					-67.749	-67.728					-65.6597	-65.9037					-66.3422	-65.9217
	-65.9105	-66.1937					-67.7503	-67.7297					-65.6626	-65.9028					-66.3517	-65.9262
	-65.9109	-66.1943					-67.7516	-67.731					-65.6657	-65.9021					-66.36	-65.9299
	-65.9115	-66.1949					-67.7527	-67.7319					-65.6688	-65.9017					-66.3669	-65.9324
	-65.9124	-66.1955					-67.7536	-67.7325					-65.672	-65.9016					-66.3723	-65.9337
	-65.9135	-66.1961					-67.7544	-67.7327					-65.675	-65.9018					-66.3763	-65.9338
	-65.9147	-66.1967					-67.7549	-67.7326					-65.6778	-65.9025					-66.3789	-65.9329
	-65.916	-66.1974					-67.7551	-67.7323					-65.6804	-65.9036					-66.3805	-65.9311
	-65.9173	-66.198					-67.7552	-67.7319					-65.6828	-65.9051					-66.3811	-65.9287
	-65.9184	-66.1985					-67.7549	-67.7314					-65.6848	-65.907					-66.3808	-65.9262
	-65.9193	-66.1992					-67.7544	-67.731					-65.6864	-65.9094					-66.3798	-65.9237
	-65.9198	-66.1998					-67.7538	-67.7306					-65.6877	-65.9122					-66.3779	-65.9215
	-65.9198	-66.2004					-67.7531	-67.7303					-65.6885	-65.9155					-66.3751	-65.9198
	-65.9193	-66.2011					-67.7524	-67.7303					-65.689	-65.9192					-66.3714	-65.9188
	-65.9183	-66.2018					-67.7518	-67.7307					-65.6891	-65.9233					-66.3666	-65.9186
	-65.9167	-66.2026					-67.7517	-67.7315					-65.6889	-65.9279					-66.3607	-65.9191
	-65.9146	-66.2035					-67.7522	-67.7331					-65.6884	-65.9329					-66.3539	-65.9205
	-65.912	-66.2045					-67.7536	-67.7356					-65.6877	-65.9384					-66.3464	-65.9226
	-65.9092	-66.2057					-67.7563	-67.7394					-65.6871	-65.9445					-66.3387	-65.9253
	-65.9064	-66.2072					-67.7608	-67.745					-65.6868	-65.9514					-66.3309	-65.9285
	-65.9037	-66.209					-67.7677	-67.753					-65.687	-65.9592					-66.3235	-65.932
	-65.9016	-66.2113					-67.7776	-67.7639					-65.6882	-65.9681					-66.3166	-65.9353
	-65.9003	-66.2143					-67.7915	-67.7787					-65.6908	-65.9783					-66.3102	-65.9382
	-65.9003	-66.2182					-67.81	-67.7982					-65.6953	-65.9903					-66.3038	-65.9402
	-65.9019	-66.2232					-67.8344	-67.8236					-65.7022	-66.0042					-66.2971	-65.9406
	-65.9056	-66.2295					-67.8655	-67.8558					-65.7122	-66.0204					-66.2891	-65.9387
	-65.9117	-66.2375					-67.9043	-67.8957					-65.7255	-66.0392					-66.2788	-65.9336
	-65.9208	-66.2474					-67.9515	-67.9443					-65.7426	-66.0609					-66.2652	-65.9246
	-65.9332	-66.2597					-68.0078	-68.0021					-65.7637	-66.0856					-66.2472	-65.9105
	-65.9492	-66.2745					-68.0733	-68.0692					-65.7886	-66.1131					-66.224	-65.8908
	-65.969	-66.2923					-68.1477	-68.1454					-65.8172	-66.1434					-66.1951	-65.8649
	-65.9928	-66.3132					-68.23	-68.2297					-65.8488	-66.1759					-66.1606	-65.8328
	-66.0205	-66.3374					-68.3188	-68.3207					-65.8824	-66.2098					-66.121	-65.795
	-66.0519	-66.3648					-68.4119	-68.4162					-65.9168	-66.2443					-66.0779	-65.7527
	-66.0868	-66.3952					-68.5063	-68.5133					-65.9506	-66.2779					-66.0331	-65.7079
	-66.1244	-66.4285					-68.5988	-68.6089					-65.9821	-66.3094					-65.9894	-65.663
	-66.1643	-66.4639					-68.6856	-68.6993					-66.0096	-66.3373					-65.9498	-65.6208
	-66.2053	-66.5009					-68.7629	-68.7808					-66.0315	-66.36					-65.9172	-65.5845
	-66.2467	-66.5386					-68.8271	-68.8499					-66.0462	-66.3762					-65.8945	-65.5571
	-66.2872	-66.576					-68.8749	-68.9035					-66.0527	-66.3848					-65.8837	-65.5409
	-66.3258	-66.6121					-68.9037	-68.9393					-66.0501	-66.3851					-65.8862	-65.5376
	-66.3615	-66.6457					-68.912	-68.9558					-66.0384	-66.3767					-65.902	-65.548
	-66.3931	-66.6758					-68.8994	-68.9526					-66.0177	-66.36					-65.9299	-65.5715
	-66.4198	-66.7016					-68.8663	-68.9303					-65.989	-66.3355					-65.9678	-65.6065
	-66.441	-66.7222					-68.8148	-68.8907					-65.9536	-66.3044					-66.0127	-65.6504
	-66.4563	-66.7372					-68.7477	-68.8367					-65.9133	-66.2683					-66.0607	-65.6997
	-66.4653	-66.7461					-68.6688	-68.7716					-65.8701	-66.229					-66.1083	-65.7507
	-66.4682	-66.7489					-68.5821	-68.6995					-65.8261	-66.1882					-66.152	-65.7996
	-66.4651	-66.7459					-68.4924	-68.6244					-65.7833	-66.1481					-66.1889	-65.8431
	-66.4566	-66.7373					-68.404	-68.5505					-65.7436	-66.1101					-66.2173	-65.8787
	-66.4433	-66.7239					-68.321	-68.4814					-65.7085	-66.0759					-66.2362	-65.9047
	-66.4259	-66.7064					-68.2466	-68.4199					-65.679	-66.0464					-66.2459	-65.9208
	-66.4053	-66.6856					-68.1835	-68.3682					-65.6559	-66.0224					-66.2474	-65.9272
	-66.3822	-66.6624					-68.1332	-68.3277					-65.6392	-66.0041					-66.2423	-65.9255
	-66.3575	-66.6376					-68.0964	-68.2987					-65.6287	-65.9913					-66.2326	-65.9176
	-66.3319	-66.6121					-68.0727	-68.2808					-65.6237	-65.9836					-66.2204	-65.9056
	-66.306	-66.5865					-68.0611	-68.2728					-65.6236	-65.9803					-66.2077	-65.8918
	-66.2805	-66.5616					-68.06	-68.2732					-65.6271	-65.9805					-66.1961	-65.8782
	-66.2557	-66.5378					-68.0673	-68.2799					-65.6332	-65.9832					-66.1869	-65.8665
	-66.2319	-66.5154					-68.0809	-68.2911					-65.6409	-65.9875					-66.1808	-65.8578
	-66.2093	-66.4947					-68.0984	-68.3046					-65.6492	-65.9925					-66.1783	-65.8527
	-66.1881	-66.4759					-68.1177	-68.3186					-65.6575	-65.9975					-66.1791	-65.8513
	-66.1684	-66.4591					-68.1372	-68.3319					-65.665	-66.0019					-66.1829	-65.8534
	-66.15	-66.444					-68.1553	-68.343					-65.6714	-66.0051					-66.1892	-65.8583
	-66.133	-66.4308					-68.1711	-68.3515					-65.6766	-66.007					-66.1972	-65.8654
	-66.1173	-66.4191					-68.1837	-68.3568					-65.6803	-66.0073					-66.2062	-65.874
	-66.1029	-66.4088					-68.1929	-68.3588					-65.6827	-66.006					-66.2156	-65.8833
	-66.0897	-66.3998					-68.1986	-68.3578					-65.6839	-66.0032					-66.2248	-65.8928
	-66.0777	-66.3918					-68.2011	-68.3541					-65.684	-65.9989					-66.2336	-65.9018
	-66.0667	-66.3845					-68.2007	-68.348					-65.6832	-65.9933					-66.2415	-65.9099
	-66.0567	-66.3779					-68.1978	-68.3402					-65.6817	-65.9866					-66.2484	-65.917
	-66.0477	-66.3716					-68.1929	-68.331					-65.6796	-65.9789					-66.2542	-65.9228
	-66.0395	-66.3654					-68.1866	-68.3209					-65.6771	-65.9705					-66.2589	-65.9273
	-66.0322	-66.3594					-68.1792	-68.3102					-65.6743	-65.9614					-66.2624	-65.9306
	-66.0257	-66.3533					-68.1712	-68.2993					-65.6713	-65.952					-66.2647	-65.9329
	-66.0198	-66.347					-68.163	-68.2882					-65.6682	-65.9423					-66.2661	-65.9344
	-66.0145	-66.3404					-68.1548	-68.2771					-65.6651	-65.9325					-66.2665	-65.9355
	-66.0098	-66.3336					-68.1469	-68.2661					-65.6621	-65.9227					-66.2661	-65.9363
	-66.0054	-66.3266					-68.1393	-68.2552					-65.6593	-65.9131					-66.2652	-65.9372
	-66.0014	-66.3193					-68.1323	-68.2445					-65.6569	-65.9036					-66.2638	-65.9383
	-65.9976	-66.3118					-68.1258	-68.2339					-65.6548	-65.8944					-66.2622	-65.9396
	-65.994	-66.3043					-68.1198	-68.2234					-65.6531	-65.8856					-66.2605	-65.9412
	-65.9905	-66.2967					-68.1144	-68.2131					-65.6518	-65.8772					-66.259	-65.9427
	-65.9871	-66.2891					-68.1096	-68.2029					-65.651	-65.8692					-66.2577	-65.9442
	-65.9838	-66.2818					-68.1052	-68.1929					-65.6504	-65.8616					-66.2567	-65.9452
	-65.9804	-66.2746					-68.1013	-68.1829					-65.6501	-65.8545					-66.256	-65.9457
	-65.9771	-66.2677					-68.0977	-68.1731					-65.6499	-65.8479					-66.2558	-65.9455
	-65.9738	-66.261					-68.0944	-68.1633					-65.6496	-65.8418					-66.256	-65.9443
	-65.9706	-66.2547					-68.0914	-68.1536					-65.649	-65.8362					-66.2567	-65.9422
	-65.9675	-66.2486					-68.0885	-68.1439					-65.6481	-65.8311					-66.2579	-65.9392
	-65.9645	-66.2429					-68.0859	-68.1343					-65.6467	-65.8266					-66.2596	-65.9353
	-65.9616	-66.2373					-68.0834	-68.1246					-65.6447	-65.8227					-66.2616	-65.9305
	-65.9589	-66.232					-68.0811	-68.115					-65.642	-65.8193					-66.264	-65.9252
	-65.9565	-66.2269					-68.0788	-68.1053					-65.6388	-65.8165					-66.2665	-65.9195
	-65.9542	-66.222					-68.0768	-68.0956					-65.635	-65.8141					-66.2688	-65.9137
	-65.9523	-66.2175					-68.0748	-68.086					-65.6308	-65.8123					-66.2707	-65.908
	-65.9506	-66.2132					-68.0729	-68.0765					-65.6264	-65.8109					-66.2719	-65.9027
	-65.9492	-66.2093					-68.0711	-68.067					-65.622	-65.81					-66.2722	-65.8979
	-65.948	-66.2058					-68.0692	-68.0578					-65.6178	-65.8095					-66.2715	-65.8937
	-65.947	-66.2029					-68.0673	-68.0488					-65.6139	-65.8094					-66.2699	-65.8903
	-65.9463	-66.2005					-68.0653	-68.0401					-65.6106	-65.8096					-66.2675	-65.8875
	-65.9457	-66.1987					-68.063	-68.0317					-65.6078	-65.8101					-66.2645	-65.8853
	-65.9453	-66.1976					-68.0605	-68.0238					-65.6058	-65.811					-66.2613	-65.8837
	-65.9449	-66.1971					-68.0575	-68.0163					-65.6045	-65.8121					-66.2583	-65.8825
	-65.9445	-66.1972					-68.0541	-68.0093					-65.6038	-65.8134					-66.2558	-65.8817
	-65.9441	-66.1978					-68.0503	-68.0028					-65.6038	-65.8149					-66.2539	-65.8813
	-65.9436	-66.1989					-68.0459	-67.9968					-65.6041	-65.8165					-66.2529	-65.8814
	-65.9429	-66.2003					-68.0412	-67.9913					-65.6048	-65.8182					-66.2529	-65.882
	-65.9419	-66.202					-68.036	-67.9863					-65.6057	-65.8199					-66.2537	-65.8833
	-65.9407	-66.2037					-68.0304	-67.9817					-65.6067	-65.8216					-66.2552	-65.8854
	-65.9391	-66.2054					-68.0246	-67.9775					-65.6075	-65.8232					-66.2573	-65.8885
	-65.9372	-66.207					-68.0187	-67.9736					-65.6083	-65.8247					-66.2596	-65.8927
	-65.935	-66.2083					-68.0126	-67.9701					-65.6088	-65.8259					-66.2619	-65.8979
	-65.9324	-66.2094					-68.0065	-67.9668					-65.6092	-65.8268					-66.2638	-65.904
	-65.9294	-66.21					-68.0005	-67.9637					-65.6095	-65.8274					-66.2651	-65.911
	-65.9263	-66.2103					-67.9945	-67.9608					-65.6096	-65.8275					-66.2657	-65.9186
	-65.9229	-66.2102					-67.9886	-67.9581					-65.6097	-65.8272					-66.2653	-65.9265
	-65.9193	-66.2098					-67.9827	-67.9556					-65.6098	-65.8263					-66.264	-65.9344
	-65.9158	-66.2092					-67.9769	-67.9534					-65.6101	-65.8248					-66.2619	-65.942
	-65.9122	-66.2084					-67.971	-67.9513					-65.6107	-65.8227					-66.2592	-65.949
	-65.9088	-66.2075					-67.9651	-67.9496					-65.6116	-65.8199					-66.256	-65.9553
	-65.9056	-66.2066					-67.959	-67.9481					-65.6129	-65.8165					-66.2528	-65.9606
	-65.9026	-66.2057					-67.9527	-67.9469					-65.6146	-65.8125					-66.2499	-65.9649
	-65.8998	-66.205					-67.9462	-67.9461					-65.6168	-65.8079					-66.2476	-65.9681
	-65.8974	-66.2044					-67.9394	-67.9455					-65.6194	-65.8027					-66.2463	-65.9703
	-65.8953	-66.204					-67.9324	-67.9453					-65.6224	-65.797					-66.246	-65.9715
	-65.8935	-66.2037					-67.9253	-67.9452					-65.6257	-65.7911					-66.2469	-65.9719
	-65.892	-66.2036					-67.9179	-67.9453					-65.6293	-65.7849					-66.2488	-65.9715
	-65.8908	-66.2036					-67.9105	-67.9454					-65.6328	-65.7787					-66.2515	-65.9706
	-65.8897	-66.2037					-67.903	-67.9453					-65.6363	-65.7726					-66.2546	-65.9691
	-65.8889	-66.2038					-67.8957	-67.945					-65.6396	-65.7669					-66.2578	-65.9672
	-65.8881	-66.2039					-67.8885	-67.9442					-65.6424	-65.7616					-66.2604	-65.9649
	-65.8875	-66.204					-67.8815	-67.9428					-65.6448	-65.757					-66.2623	-65.9621
	-65.8869	-66.2039					-67.8749	-67.9406					-65.6465	-65.7531					-66.2633	-65.9591
	-65.8863	-66.2038					-67.8686	-67.9376					-65.6476	-65.7501					-66.2632	-65.9558
	-65.8857	-66.2036					-67.8627	-67.9337					-65.648	-65.748					-66.2621	-65.9524
	-65.8851	-66.2032					-67.8572	-67.9289					-65.6478	-65.7469					-66.2604	-65.9489
	-65.8844	-66.2027					-67.852	-67.923					-65.647	-65.7466					-66.2583	-65.9454
	-65.8836	-66.2021					-67.8471	-67.9163					-65.6457	-65.7472					-66.2563	-65.9421
	-65.8828	-66.2012					-67.8424	-67.9088					-65.6442	-65.7486					-66.2548	-65.9391
	-65.882	-66.2002					-67.8378	-67.9005					-65.6426	-65.7506					-66.254	-65.9364
	-65.8812	-66.1991					-67.8333	-67.8917					-65.6411	-65.753					-66.2541	-65.9341
	-65.8804	-66.1978					-67.8287	-67.8825					-65.6397	-65.7558					-66.2553	-65.9322
	-65.8797	-66.1964					-67.8239	-67.8731					-65.6388	-65.7588					-66.2574	-65.9308
	-65.879	-66.1948					-67.8188	-67.8636					-65.6383	-65.7619					-66.2603	-65.9299
	-65.8786	-66.1931					-67.8134	-67.8542					-65.6384	-65.765					-66.2635	-65.9294
	-65.8783	-66.1914					-67.8078	-67.8451					-65.6391	-65.7679					-66.2667	-65.9294
	-65.8782	-66.1896					-67.8019	-67.8363					-65.6403	-65.7707					-66.2697	-65.9298
	-65.8784	-66.1877					-67.7958	-67.828					-65.642	-65.7733					-66.272	-65.9307
	-65.8787	-66.1858					-67.7896	-67.8202					-65.6441	-65.7757					-66.2735	-65.932
	-65.8793	-66.1838					-67.7834	-67.813					-65.6465	-65.7778					-66.2741	-65.9337
	-65.8799	-66.1818					-67.7773	-67.8064					-65.649	-65.7797					-66.2738	-65.9359
	-65.8807	-66.1798					-67.7714	-67.8004					-65.6514	-65.7813					-66.2728	-65.9383
	-65.8814	-66.1777					-67.7658	-67.795					-65.6536	-65.7827					-66.2711	-65.941
	-65.8821	-66.1756					-67.7606	-67.7902					-65.6554	-65.7837					-66.2692	-65.9437
	-65.8826	-66.1734					-67.7559	-67.786					-65.6567	-65.7845					-66.2672	-65.9464
	-65.8828	-66.1712					-67.7516	-67.7822					-65.6573	-65.7849					-66.2654	-65.9489
	-65.8828	-66.1688					-67.7478	-67.7788					-65.6573	-65.7849					-66.264	-65.951
	-65.8825	-66.1663					-67.7444	-67.7756					-65.6564	-65.7845					-66.2632	-65.9526
	-65.8818	-66.1637					-67.7413	-67.7725					-65.6548	-65.7837					-66.263	-65.9537
	-65.8807	-66.161					-67.7384	-67.7692					-65.6524	-65.7824					-66.2634	-65.9542
	-65.8793	-66.1581					-67.7356	-67.7657					-65.6493	-65.7807					-66.2643	-65.9544
	-65.8774	-66.1551					-67.7329	-67.7616					-65.6457	-65.7786					-66.2655	-65.9541
	-65.8753	-66.152					-67.7301	-67.7569					-65.6416	-65.7762					-66.2666	-65.9536
	-65.8729	-66.1489					-67.7272	-67.7513					-65.6371	-65.7735					-66.2673	-65.953
	-65.8702	-66.1456					-67.7241	-67.7448					-65.6324	-65.7706					-66.2674	-65.9522
	-65.8673	-66.1424					-67.7207	-67.7372					-65.6276	-65.7677					-66.2664	-65.9513
	-65.8643	-66.1393					-67.7171	-67.7285					-65.6228	-65.7647					-66.2643	-65.9502
	-65.8611	-66.1362					-67.7132	-67.7188					-65.6181	-65.7619					-66.2609	-65.949
	-65.8577	-66.1333					-67.7091	-67.7081					-65.6136	-65.7592					-66.2563	-65.9476
	-65.8544	-66.1307					-67.7048	-67.6965					-65.6094	-65.7566					-66.2507	-65.946
	-65.8509	-66.1283					-67.7003	-67.6842					-65.6055	-65.7542					-66.2443	-65.9445
	-65.8474	-66.1262					-67.6956	-67.6713					-65.6021	-65.752					-66.2377	-65.943
	-65.8439	-66.1244					-67.6908	-67.6581					-65.599	-65.7498					-66.2311	-65.9418
	-65.8404	-66.1228					-67.6859	-67.6445					-65.5965	-65.7477					-66.225	-65.9411
	-65.8368	-66.1216					-67.681	-67.6308					-65.5944	-65.7455					-66.2198	-65.9411
	-65.8333	-66.1205					-67.6761	-67.6171					-65.5928	-65.7433					-66.2157	-65.9417
	-65.8297	-66.1195					-67.6712	-67.6033					-65.5918	-65.7409					-66.213	-65.9431
	-65.8262	-66.1185					-67.6663	-67.5897					-65.5912	-65.7385					-66.2117	-65.9452
	-65.8227	-66.1175					-67.6617	-67.5763					-65.5912	-65.736					-66.2117	-65.948
	-65.8193	-66.1163					-67.6572	-67.563					-65.5917	-65.7334					-66.2128	-65.9512
	-65.816	-66.1149					-67.653	-67.55					-65.5926	-65.7309					-66.2146	-65.9546
	-65.8128	-66.1131					-67.649	-67.5372					-65.5938	-65.7285					-66.2169	-65.9581
	-65.8098	-66.111					-67.6454	-67.5247					-65.5952	-65.7263					-66.2193	-65.9614
	-65.8068	-66.1084					-67.6421	-67.5126					-65.5967	-65.7243					-66.2214	-65.9642
	-65.8041	-66.1054					-67.6391	-67.5009					-65.5981	-65.7227					-66.2231	-65.9663
	-65.8015	-66.1019					-67.6363	-67.4897					-65.5993	-65.7213					-66.2241	-65.9676
	-65.7991	-66.098					-67.6337	-67.4791					-65.6002	-65.7203					-66.2245	-65.9681
	-65.7968	-66.0937					-67.6312	-67.469					-65.6006	-65.7196					-66.2244	-65.9677
	-65.7947	-66.0889					-67.6287	-67.4597					-65.6005	-65.719					-66.2238	-65.9666
	-65.7927	-66.0837					-67.626	-67.4509					-65.5998	-65.7186					-66.2229	-65.9648
	-65.7907	-66.0782					-67.6231	-67.4428					-65.5984	-65.7182					-66.2221	-65.9626
	-65.7889	-66.0724					-67.6199	-67.4352					-65.5965	-65.7176					-66.2214	-65.9603
	-65.787	-66.0663					-67.6163	-67.4279					-65.594	-65.7169					-66.2211	-65.9581
	-65.7852	-66.0599					-67.6123	-67.4208					-65.5911	-65.7159					-66.2213	-65.9562
	-65.7832	-66.0533					-67.6079	-67.4137					-65.5879	-65.7145					-66.2222	-65.9548
	-65.7812	-66.0466					-67.6031	-67.4064					-65.5846	-65.7129					-66.2238	-65.954
	-65.7791	-66.0396					-67.5978	-67.3986					-65.5813	-65.7109					-66.2261	-65.9539
	-65.7768	-66.0326					-67.5922	-67.3902					-65.5781	-65.7087					-66.229	-65.9544
	-65.7743	-66.0254					-67.5863	-67.3809					-65.5752	-65.7064					-66.2324	-65.9556
	-65.7716	-66.0181					-67.5801	-67.3706					-65.5728	-65.7041					-66.2363	-65.957
	-65.7687	-66.0106					-67.5736	-67.3593					-65.571	-65.7018					-66.2404	-65.9586
	-65.7656	-66.0031					-67.567	-67.3468					-65.5697	-65.6999					-66.2447	-65.9601
	-65.7623	-65.9956					-67.5601	-67.3333					-65.5691	-65.6983					-66.2491	-65.9609
	-65.7587	-65.988					-67.5532	-67.3187					-65.5692	-65.6972					-66.2534	-65.961
	-65.755	-65.9804					-67.5462	-67.3032					-65.5698	-65.6967					-66.2577	-65.9599
	-65.7512	-65.9728					-67.5392	-67.2869					-65.5709	-65.6968					-66.2618	-65.9574
	-65.7472	-65.9653					-67.5322	-67.27					-65.5724	-65.6975					-66.2654	-65.9535
	-65.7432	-65.958					-67.5252	-67.2527					-65.5742	-65.6989					-66.2682	-65.9482
	-65.7391	-65.9509					-67.5184	-67.2351					-65.576	-65.7007					-66.2701	-65.9414
	-65.7349	-65.9439					-67.5118	-67.2174					-65.5777	-65.703					-66.2707	-65.9334
	-65.7308	-65.9373					-67.5055	-67.1998					-65.5792	-65.7056					-66.2697	-65.9245
	-65.7267	-65.9309					-67.4994	-67.1823					-65.5803	-65.7085					-66.267	-65.9149
	-65.7226	-65.9247					-67.4936	-67.1651					-65.5808	-65.7114					-66.2626	-65.905
	-65.7186	-65.9189					-67.4881	-67.1482					-65.5808	-65.7144					-66.2565	-65.8951
	-65.7146	-65.9133					-67.483	-67.1317					-65.5802	-65.7173					-66.2489	-65.8854
	-65.7106	-65.9078					-67.4781	-67.1157					-65.579	-65.7202					-66.2403	-65.8761
	-65.7067	-65.9025					-67.4734	-67.1001					-65.5772	-65.7229					-66.2311	-65.8673
	-65.7027	-65.8973					-67.4689	-67.085					-65.5749	-65.7254					-66.2217	-65.859
	-65.6987	-65.892					-67.4645	-67.0704					-65.5724	-65.7278					-66.2125	-65.8514
	-65.6947	-65.8867					-67.46	-67.0563					-65.5696	-65.73					-66.2038	-65.8442
	-65.6907	-65.8813					-67.4554	-67.0428					-65.5667	-65.7319					-66.196	-65.8376
	-65.6866	-65.8757					-67.4506	-67.0299					-65.5639	-65.7336					-66.189	-65.8315
	-65.6824	-65.87					-67.4454	-67.0177					-65.5613	-65.7349					-66.1829	-65.8258
	-65.6783	-65.864					-67.4397	-67.0061					-65.5589	-65.7359					-66.1774	-65.8206
	-65.6741	-65.8577					-67.4336	-66.9952					-65.5568	-65.7365					-66.1723	-65.8158
	-65.67	-65.8513					-67.4268	-66.985					-65.555	-65.7366					-66.1673	-65.8113
	-65.666	-65.8445					-67.4195	-66.9755					-65.5537	-65.7362					-66.1622	-65.8071
	-65.6621	-65.8375					-67.4116	-66.9665					-65.5527	-65.7352					-66.1568	-65.8029
	-65.6583	-65.8303					-67.4032	-66.9581					-65.5521	-65.7337					-66.1512	-65.7983
	-65.6547	-65.8228					-67.3943	-66.9501					-65.5518	-65.7316					-66.1455	-65.7932
	-65.6513	-65.8151					-67.385	-66.9423					-65.5519	-65.729					-66.1396	-65.7872
	-65.648	-65.8072					-67.3754	-66.9347					-65.5522	-65.7259					-66.1339	-65.7803
	-65.645	-65.799					-67.3658	-66.927					-65.5528	-65.7225					-66.1287	-65.7723
	-65.6421	-65.7905					-67.3561	-66.9191					-65.5536	-65.7187					-66.124	-65.7633
	-65.6393	-65.7818					-67.3465	-66.9108					-65.5546	-65.7147					-66.1201	-65.7536
	-65.6367	-65.7728					-67.3373	-66.902					-65.5557	-65.7106					-66.1171	-65.7435
	-65.6341	-65.7634					-67.3284	-66.8925					-65.5567	-65.7064					-66.115	-65.7331
	-65.6316	-65.7538					-67.3201	-66.8823					-65.5577	-65.7023					-66.1139	-65.7227
	-65.6289	-65.7438					-67.3123	-66.8712					-65.5584	-65.6984					-66.1136	-65.7125
	-65.6262	-65.7334					-67.3051	-66.8593					-65.5588	-65.6946					-66.1139	-65.7025
	-65.6234	-65.7227					-67.2986	-66.8466					-65.5587	-65.6911					-66.1147	-65.6927
	-65.6204	-65.7117					-67.2927	-66.833					-65.5581	-65.6878					-66.1158	-65.6829
	-65.6171	-65.7002					-67.2875	-66.8188					-65.5568	-65.6846					-66.1167	-65.673
	-65.6135	-65.6885					-67.2829	-66.8038					-65.5547	-65.6817					-66.1174	-65.6629
	-65.6096	-65.6763					-67.2788	-66.7884					-65.5518	-65.6788					-66.1174	-65.6528
	-65.6053	-65.6639					-67.2751	-66.7726					-65.5482	-65.6759					-66.1167	-65.6427
	-65.6007	-65.6512					-67.2719	-66.7564					-65.5437	-65.6728					-66.1151	-65.6328
	-65.5956	-65.6382					-67.2689	-66.7401					-65.5385	-65.6696					-66.1124	-65.6232
	-65.5901	-65.625					-67.2662	-66.7237					-65.5326	-65.666					-66.1087	-65.6144
	-65.5842	-65.6117					-67.2635	-66.7074					-65.5262	-65.662					-66.1041	-65.6064
	-65.5779	-65.5982					-67.2608	-66.6912					-65.5194	-65.6574					-66.0987	-65.5992
	-65.5712	-65.5847					-67.258	-66.6752					-65.5124	-65.6523					-66.0928	-65.593
	-65.5641	-65.5711					-67.255	-66.6596					-65.5055	-65.6466					-66.0864	-65.5873
	-65.5566	-65.5576					-67.2516	-66.6444					-65.4988	-65.6404					-66.0798	-65.5821
	-65.5489	-65.544					-67.2478	-66.6297					-65.4924	-65.6335					-66.0732	-65.5768
	-65.5408	-65.5305					-67.2436	-66.6155					-65.4866	-65.6262					-66.0666	-65.5711
	-65.5326	-65.5171					-67.2388	-66.6019					-65.4815	-65.6186					-66.0602	-65.5647
	-65.5241	-65.5036					-67.2336	-66.5889					-65.477	-65.6106					-66.054	-65.5572
	-65.5155	-65.4902					-67.2277	-66.5764					-65.4734	-65.6024					-66.048	-65.5485
	-65.5069	-65.4767					-67.2213	-66.5645					-65.4704	-65.5942					-66.0422	-65.5385
	-65.4982	-65.4632					-67.2145	-66.5531					-65.4681	-65.5859					-66.0365	-65.5271
	-65.4895	-65.4496					-67.2071	-66.5421					-65.4663	-65.5775					-66.0308	-65.5146
	-65.4809	-65.4358					-67.1994	-66.5314					-65.465	-65.5692					-66.0252	-65.5012
	-65.4725	-65.4218					-67.1912	-66.5209					-65.4639	-65.5608					-66.0196	-65.487
	-65.4643	-65.4077					-67.1827	-66.5104					-65.463	-65.5524					-66.0139	-65.4725
	-65.4563	-65.3933					-67.1739	-66.4999					-65.462	-65.5437					-66.0083	-65.4579
	-65.4485	-65.3787					-67.1649	-66.4892					-65.4609	-65.5349					-66.0028	-65.4433
	-65.441	-65.3639					-67.1556	-66.4781					-65.4595	-65.5258					-65.9974	-65.429
	-65.4338	-65.3489					-67.1462	-66.4666					-65.4579	-65.5164					-65.9924	-65.415
	-65.4269	-65.3338					-67.1365	-66.4546					-65.456	-65.5069					-65.9878	-65.4011
	-65.4203	-65.3185					-67.1267	-66.442					-65.4538	-65.4971					-65.9838	-65.3873
	-65.4138	-65.3031					-67.1167	-66.429					-65.4513	-65.4874					-65.9806	-65.3733
	-65.4076	-65.2877					-67.1067	-66.4154					-65.4487	-65.4778					-65.9783	-65.3589
	-65.4015	-65.2723					-67.0965	-66.4013					-65.4459	-65.4685					-65.977	-65.3439
	-65.3956	-65.2568					-67.0864	-66.3868					-65.4432	-65.4597					-65.9767	-65.3282
	-65.3896	-65.2413					-67.0762	-66.3721					-65.4405	-65.4516					-65.9775	-65.3117
	-65.3838	-65.2258					-67.0662	-66.3572					-65.4381	-65.4444					-65.9792	-65.2946
	-65.3779	-65.2103					-67.0564	-66.3422					-65.436	-65.438					-65.9819	-65.277
	-65.3719	-65.1948					-67.0469	-66.3274					-65.4343	-65.4325					-65.9851	-65.259
	-65.366	-65.1792					-67.0376	-66.3127					-65.4332	-65.4281					-65.9889	-65.2411
	-65.36	-65.1637					-67.0288	-66.2982					-65.4326	-65.4244					-65.9927	-65.2235
	-65.3539	-65.1481					-67.0204	-66.2841					-65.4325	-65.4215					-65.9965	-65.2064
	-65.3478	-65.1325					-67.0124	-66.2704					-65.433	-65.4192					-65.9997	-65.1901
	-65.3417	-65.117					-67.0049	-66.2571					-65.434	-65.4173					-66.0023	-65.1748
	-65.3354	-65.1016					-66.9979	-66.2442					-65.4355	-65.4156					-66.0038	-65.1604
	-65.3291	-65.0864					-66.9912	-66.2316					-65.4372	-65.414					-66.0042	-65.1469
	-65.3226	-65.0713					-66.9849	-66.2193					-65.439	-65.4123					-66.0034	-65.1344
	-65.316	-65.0565					-66.979	-66.2072					-65.4409	-65.4105					-66.0014	-65.1227
	-65.3092	-65.0419					-66.9733	-66.1952					-65.4427	-65.4086					-65.9983	-65.1116
	-65.3022	-65.0277					-66.9679	-66.1831					-65.4441	-65.4065					-65.9944	-65.1009
	-65.2951	-65.0138					-66.9627	-66.1709					-65.4451	-65.4043					-65.9898	-65.0906
	-65.2877	-65.0003					-66.9577	-66.1585					-65.4455	-65.402					-65.9849	-65.0804
	-65.2802	-64.9871					-66.953	-66.1457					-65.4453	-65.3997					-65.9799	-65.0703
	-65.2724	-64.9743					-66.9485	-66.1325					-65.4444	-65.3975					-65.9751	-65.06
	-65.2645	-64.9618					-66.9442	-66.1188					-65.4427	-65.3955					-65.9707	-65.0496
	-65.2565	-64.9496					-66.9401	-66.1046					-65.4403	-65.3936					-65.9667	-65.0387
	-65.2484	-64.9376					-66.9363	-66.09					-65.4372	-65.392					-65.9631	-65.0272
	-65.2402	-64.9257					-66.9325	-66.0749					-65.4335	-65.3905					-65.9598	-65.0148
	-65.2321	-64.9139					-66.9288	-66.0593					-65.4293	-65.3891					-65.9567	-65.0014
	-65.224	-64.9021					-66.9251	-66.0434					-65.4245	-65.3877					-65.9535	-64.9867
	-65.2159	-64.8902					-66.9213	-66.0272					-65.4194	-65.3863					-65.95	-64.9706
	-65.2079	-64.878					-66.9171	-66.0108					-65.4141	-65.3847					-65.9462	-64.9529
	-65.2	-64.8655					-66.9126	-65.9944					-65.4086	-65.3828					-65.9417	-64.934
	-65.1923	-64.8527					-66.9075	-65.978					-65.4031	-65.3806					-65.9366	-64.914
	-65.1846	-64.8393					-66.9018	-65.9616					-65.3977	-65.3779					-65.9307	-64.8934
	-65.1771	-64.8255					-66.8953	-65.9455					-65.3924	-65.3747					-65.9241	-64.8729
	-65.1697	-64.811					-66.8879	-65.9297					-65.3873	-65.371					-65.917	-64.853
	-65.1624	-64.796					-66.8797	-65.9141					-65.3825	-65.3669					-65.9094	-64.8342
	-65.1552	-64.7803					-66.8706	-65.8989					-65.3779	-65.3623					-65.9017	-64.817
	-65.1479	-64.7641					-66.8607	-65.884					-65.3736	-65.3574					-65.8942	-64.8016
	-65.1407	-64.7473					-66.8499	-65.8693					-65.3695	-65.3522					-65.8873	-64.788
	-65.1335	-64.73					-66.8383	-65.8549					-65.3656	-65.3468					-65.8812	-64.7761
	-65.1262	-64.7123					-66.8261	-65.8406					-65.3618	-65.3414					-65.8764	-64.7656
	-65.1189	-64.6942					-66.8132	-65.8264					-65.358	-65.3359					-65.8729	-64.756
	-65.1114	-64.6759					-66.7999	-65.8122					-65.3543	-65.3305					-65.8706	-64.747
	-65.1037	-64.6574					-66.7862	-65.7979					-65.3506	-65.3253					-65.8695	-64.7382
	-65.0959	-64.6388					-66.7723	-65.7835					-65.3468	-65.3202					-65.8692	-64.7293
	-65.0879	-64.6201					-66.7581	-65.7689					-65.3429	-65.3154					-65.8693	-64.7201
	-65.0797	-64.6015					-66.744	-65.7542					-65.339	-65.3108					-65.8694	-64.7107
	-65.0713	-64.583					-66.7299	-65.7394					-65.3349	-65.3065					-65.869	-64.7009
	-65.0627	-64.5646					-66.7159	-65.7245					-65.3308	-65.3024					-65.8678	-64.691
	-65.054	-64.5464					-66.7022	-65.7097					-65.3268	-65.2985					-65.8656	-64.6808
	-65.0451	-64.5284					-66.6888	-65.695					-65.3227	-65.2949					-65.8623	-64.6706
	-65.0361	-64.5106					-66.6758	-65.6806					-65.3188	-65.2915					-65.8579	-64.6602
	-65.0271	-64.493					-66.6633	-65.6664					-65.3151	-65.2883					-65.8525	-64.6498
	-65.018	-64.4757					-66.6513	-65.6527					-65.3115	-65.2852					-65.8465	-64.6391
	-65.009	-64.4586					-66.6399	-65.6394					-65.308	-65.2823					-65.8401	-64.6281
	-65.0001	-64.4417					-66.6291	-65.6265					-65.3046	-65.2795					-65.8336	-64.6165
	-64.9912	-64.425					-66.6189	-65.614					-65.3014	-65.2767					-65.8272	-64.6042
	-64.9825	-64.4086					-66.6094	-65.6019					-65.2981	-65.2738					-65.8211	-64.5908
	-64.9739	-64.3925					-66.6005	-65.5902					-65.2947	-65.2708					-65.8153	-64.5763
	-64.9654	-64.3765					-66.5923	-65.5787					-65.2912	-65.2677					-65.8097	-64.5606
	-64.9571	-64.3609					-66.5847	-65.5674					-65.2874	-65.2642					-65.8041	-64.5437
	-64.9488	-64.3455					-66.5776	-65.5562					-65.2832	-65.2603					-65.7985	-64.5256
	-64.9407	-64.3304					-66.5711	-65.545					-65.2786	-65.2561					-65.7927	-64.5065
	-64.9325	-64.3156					-66.5651	-65.5337					-65.2736	-65.2513					-65.7865	-64.4867
	-64.9243	-64.3011					-66.5595	-65.5222					-65.2682	-65.246					-65.7799	-64.4663
	-64.916	-64.2869					-66.5543	-65.5105					-65.2624	-65.2402					-65.7728	-64.4456
	-64.9076	-64.2729					-66.5493	-65.4986					-65.2564	-65.2339					-65.7654	-64.4249
	-64.899	-64.2592					-66.5444	-65.4865					-65.2503	-65.2271					-65.7577	-64.4043
	-64.8902	-64.2457					-66.5397	-65.474					-65.2442	-65.2199					-65.7498	-64.3838
	-64.8811	-64.2324					-66.535	-65.4611					-65.2382	-65.2124					-65.742	-64.3637
	-64.8717	-64.2192					-66.5303	-65.4479					-65.2326	-65.2045					-65.7345	-64.3439
	-64.862	-64.2061					-66.5254	-65.4342					-65.2274	-65.1965					-65.7272	-64.3245
	-64.852	-64.1931					-66.5204	-65.4201					-65.2227	-65.1882					-65.7205	-64.3053
	-64.8415	-64.1801					-66.5153	-65.4055					-65.2185	-65.1798					-65.7144	-64.2864
	-64.8307	-64.167					-66.5101	-65.3902					-65.2148	-65.1713					-65.7088	-64.2678
	-64.8196	-64.1539					-66.5047	-65.3743					-65.2116	-65.1628					-65.7038	-64.2496
	-64.8082	-64.1407					-66.4993	-65.3578					-65.2087	-65.1541					-65.6993	-64.2318
	-64.7966	-64.1274					-66.4939	-65.3405					-65.2061	-65.1454					-65.695	-64.2146
	-64.7847	-64.114					-66.4884	-65.3226					-65.2036	-65.1366					-65.6908	-64.198
	-64.7727	-64.1005					-66.4829	-65.3041					-65.201	-65.1277					-65.6865	-64.1823
	-64.7605	-64.0868					-66.4775	-65.2851					-65.1982	-65.1188					-65.6817	-64.1675
	-64.7484	-64.073					-66.472	-65.2657					-65.1951	-65.1099					-65.6764	-64.1535
	-64.7363	-64.059					-66.4667	-65.246					-65.1916	-65.1011					-65.6704	-64.1404
	-64.7243	-64.0448					-66.4612	-65.2263					-65.1877	-65.0924					-65.6637	-64.1279
	-64.7125	-64.0304					-66.4557	-65.2068					-65.1833	-65.0839					-65.6564	-64.1161
	-64.7009	-64.0157					-66.4501	-65.1876					-65.1785	-65.0758					-65.6487	-64.1048
	-64.6896	-64.0008					-66.4442	-65.169					-65.1734	-65.0679					-65.6408	-64.0938
	-64.6786	-63.9856					-66.4381	-65.1512					-65.168	-65.0605					-65.6331	-64.083
	-64.668	-63.9702					-66.4317	-65.1343					-65.1623	-65.0536					-65.6258	-64.0724
	-64.6578	-63.9546					-66.4249	-65.1184					-65.1566	-65.0471					-65.6191	-64.0618
	-64.648	-63.9388					-66.4177	-65.1036					-65.1509	-65.041					-65.6132	-64.0511
	-64.6387	-63.9228					-66.4102	-65.0899					-65.1453	-65.0352					-65.6082	-64.0402
	-64.6299	-63.9066					-66.4022	-65.0772					-65.1398	-65.0297					-65.6041	-64.0291
	-64.6215	-63.8903					-66.394	-65.0654					-65.1345	-65.0243					-65.601	-64.0176
	-64.6135	-63.874					-66.3853	-65.0544					-65.1294	-65.019					-65.5986	-64.0055
	-64.606	-63.8576					-66.3764	-65.0441					-65.1245	-65.0135					-65.5969	-63.9928
	-64.5988	-63.8411					-66.3672	-65.0343					-65.1198	-65.0077					-65.5956	-63.9794
	-64.5919	-63.8245					-66.3577	-65.0248					-65.1153	-65.0016					-65.5947	-63.9651
	-64.5854	-63.8078					-66.3481	-65.0155					-65.111	-64.9952					-65.594	-63.95
	-64.579	-63.7909					-66.3382	-65.0063					-65.1069	-64.9882					-65.5932	-63.9341
	-64.5729	-63.774					-66.3281	-64.9971					-65.1028	-64.9809					-65.5921	-63.9175
	-64.5667	-63.7569					-66.3179	-64.9878					-65.099	-64.9731					-65.5906	-63.9003
	-64.5606	-63.7396					-66.3076	-64.9786					-65.0952	-64.9651					-65.5884	-63.8828
	-64.5545	-63.7222					-66.2971	-64.9692					-65.0915	-64.9569					-65.5854	-63.865
	-64.5483	-63.7047					-66.2867	-64.9598					-65.0879	-64.9485					-65.5814	-63.8473
	-64.5419	-63.6871					-66.2764	-64.9502					-65.0843	-64.9402					-65.5766	-63.8297
	-64.5353	-63.6695					-66.2662	-64.9406					-65.0808	-64.9321					-65.571	-63.8123
	-64.5285	-63.6519					-66.2562	-64.9309					-65.0772	-64.9243					-65.5647	-63.7953
	-64.5215	-63.6345					-66.2465	-64.921					-65.0736	-64.9168					-65.5582	-63.7788
	-64.5143	-63.6173					-66.2371	-64.9109					-65.0698	-64.9098					-65.5516	-63.7626
	-64.5068	-63.6003					-66.2281	-64.9005					-65.0659	-64.9033					-65.5453	-63.7467
	-64.499	-63.5835					-66.2196	-64.8897					-65.0617	-64.8973					-65.5395	-63.731
	-64.4911	-63.5671					-66.2114	-64.8786					-65.0572	-64.8917					-65.5341	-63.7154
	-64.4829	-63.551					-66.2035	-64.8671					-65.0523	-64.8866					-65.5291	-63.6996
	-64.4745	-63.5352					-66.196	-64.855					-65.0469	-64.8818					-65.524	-63.6835
	-64.4659	-63.5197					-66.1887	-64.8425					-65.0411	-64.8773					-65.5185	-63.667
	-64.4571	-63.5045					-66.1815	-64.8295					-65.0347	-64.873					-65.512	-63.6499
	-64.4481	-63.4895					-66.1744	-64.8162					-65.0279	-64.8687					-65.5041	-63.6322
	-64.4389	-63.4747					-66.1672	-64.8026					-65.0205	-64.8644					-65.4944	-63.6141
	-64.4296	-63.46					-66.1598	-64.7889					-65.0127	-64.8599					-65.4828	-63.5956
	-64.4201	-63.4454					-66.1522	-64.7752					-65.0046	-64.8552					-65.4693	-63.5771
	-64.4104	-63.4309					-66.1444	-64.7617					-64.9962	-64.8502					-65.4544	-63.5588
	-64.4006	-63.4166					-66.1363	-64.7484					-64.9877	-64.8448					-65.4386	-63.541
	-64.3907	-63.4023					-66.1281	-64.7357					-64.9792	-64.839					-65.4225	-63.5238
	-64.3808	-63.3881					-66.1197	-64.7234					-64.9708	-64.8329					-65.4068	-63.5075
	-64.3707	-63.374					-66.1112	-64.7117					-64.9626	-64.8264					-65.3924	-63.492
	-64.3607	-63.36					-66.1026	-64.7007					-64.9547	-64.8195					-65.3795	-63.4771
	-64.3507	-63.3461					-66.0942	-64.6903					-64.9471	-64.8124					-65.3688	-63.4627
	-64.3407	-63.3323					-66.0859	-64.6805					-64.9399	-64.8049					-65.3602	-63.4485
	-64.3308	-63.3186					-66.0778	-64.6711					-64.933	-64.7973					-65.3537	-63.4342
	-64.321	-63.305					-66.0699	-64.662					-64.9265	-64.7895					-65.349	-63.4195
	-64.3114	-63.2915					-66.0623	-64.6533					-64.9202	-64.7816					-65.3457	-63.4041
	-64.3019	-63.278					-66.0549	-64.6446					-64.9141	-64.7736					-65.343	-63.3881
	-64.2926	-63.2646					-66.0478	-64.6358					-64.9082	-64.7656					-65.3406	-63.3714
	-64.2834	-63.2511					-66.0408	-64.627					-64.9024	-64.7574					-65.3376	-63.354
	-64.2744	-63.2376					-66.034	-64.6179					-64.8967	-64.7491					-65.3338	-63.3361
	-64.2656	-63.224					-66.0274	-64.6085					-64.8911	-64.7406					-65.3288	-63.3179
	-64.257	-63.2104					-66.021	-64.5988					-64.8855	-64.7319					-65.3226	-63.2996
	-64.2486	-63.1968					-66.0146	-64.5888					-64.8799	-64.7227					-65.3152	-63.2815
	-64.2404	-63.1831					-66.0085	-64.5786					-64.8744	-64.7131					-65.307	-63.2638
	-64.2324	-63.1695					-66.0026	-64.5681					-64.8691	-64.703					-65.2983	-63.2466
	-64.2246	-63.156					-65.9969	-64.5575					-64.8638	-64.6922					-65.2894	-63.23
	-64.217	-63.1425					-65.9915	-64.5468					-64.8588	-64.6807					-65.2808	-63.214
	-64.2096	-63.1293					-65.9864	-64.536					-64.8539	-64.6687					-65.2726	-63.1986
	-64.2025	-63.1162					-65.9816	-64.5252					-64.8492	-64.656					-65.2649	-63.1838
	-64.1955	-63.1035					-65.9771	-64.5143					-64.8448	-64.6429					-65.2577	-63.1693
	-64.1888	-63.091					-65.9729	-64.5033					-64.8405	-64.6295					-65.2508	-63.1552
	-64.1823	-63.0788					-65.9689	-64.4922					-64.8363	-64.616					-65.2443	-63.1413
	-64.1759	-63.067					-65.9651	-64.4809					-64.8324	-64.6026					-65.238	-63.1274
	-64.1698	-63.0553					-65.9613	-64.4694					-64.8285	-64.5895					-65.2319	-63.1136
	-64.1638	-63.0439					-65.9573	-64.4576					-64.8247	-64.577					-65.2262	-63.0998
	-64.1579	-63.0327					-65.9531	-64.4456					-64.821	-64.5651					-65.2208	-63.0861
	-64.1521	-63.0215					-65.9486	-64.4332					-64.8172	-64.554					-65.2158	-63.0725
	-64.1464	-63.0103					-65.9436	-64.4206					-64.8134	-64.5437					-65.2114	-63.0594
	-64.1407	-62.999					-65.938	-64.4078					-64.8096	-64.5344					-65.2075	-63.0467
	-64.135	-62.9875					-65.9318	-64.3949					-64.8056	-64.5259					-65.2039	-63.0348
	-64.1291	-62.9758					-65.925	-64.382					-64.8016	-64.5181					-65.2005	-63.0236
	-64.1232	-62.9639					-65.9177	-64.3692					-64.7975	-64.5111					-65.1971	-63.0132
	-64.1171	-62.9516					-65.9098	-64.3567					-64.7932	-64.5045					-65.1934	-63.0035
	-64.1108	-62.939					-65.9015	-64.3443					-64.7889	-64.4984					-65.1894	-62.9944
	-64.1042	-62.9261					-65.8929	-64.3323					-64.7844	-64.4926					-65.1849	-62.9855
	-64.0973	-62.9128					-65.8841	-64.3206					-64.7798	-64.4869					-65.18	-62.9765
	-64.0901	-62.8992					-65.8753	-64.3091					-64.7752	-64.4813					-65.1747	-62.9673
	-64.0826	-62.8854					-65.8665	-64.2978					-64.7705	-64.4757					-65.169	-62.9575
	-64.0749	-62.8712					-65.8579	-64.2866					-64.7659	-64.4702					-65.1631	-62.947
	-64.0668	-62.8568					-65.8494	-64.2753					-64.7612	-64.4646					-65.157	-62.9354
	-64.0586	-62.8422					-65.8412	-64.2639					-64.7566	-64.4591					-65.1506	-62.9229
	-64.0502	-62.8274					-65.8333	-64.2522					-64.7521	-64.4536					-65.144	-62.9093
	-64.0416	-62.8124					-65.8255	-64.2402					-64.7478	-64.4482					-65.1372	-62.8948
	-64.0329	-62.7974					-65.8179	-64.2277					-64.7436	-64.443					-65.1302	-62.8793
	-64.0243	-62.7823					-65.8105	-64.2148					-64.7396	-64.438					-65.123	-62.8632
	-64.0156	-62.7671					-65.8031	-64.2013					-64.7359	-64.4332					-65.1158	-62.8466
	-64.0069	-62.7521					-65.7958	-64.1875					-64.7323	-64.4287					-65.1087	-62.8297
	-63.9984	-62.7371					-65.7885	-64.1732					-64.7289	-64.4245					-65.1019	-62.8128
	-63.9899	-62.7223					-65.7813	-64.1586					-64.7256	-64.4206					-65.0954	-62.796
	-63.9816	-62.7077					-65.7741	-64.1437					-64.7224	-64.417					-65.0894	-62.7796
	-63.9734	-62.6935					-65.7671	-64.1288					-64.7193	-64.4137					-65.084	-62.7638
	-63.9653	-62.6795					-65.7601	-64.1137					-64.7161	-64.4105					-65.079	-62.7486
	-63.9573	-62.6658					-65.7533	-64.0987					-64.7128	-64.4074					-65.0745	-62.734
	-63.9494	-62.6525					-65.7466	-64.0838					-64.7093	-64.4043					-65.0702	-62.72
	-63.9415	-62.6396					-65.7402	-64.0691					-64.7055	-64.4013					-65.0661	-62.7065
	-63.9336	-62.6269					-65.7339	-64.0545					-64.7014	-64.3981					-65.062	-62.6933
	-63.9256	-62.6145					-65.7277	-64.0402					-64.6969	-64.3948					-65.0581	-62.6803
	-63.9175	-62.6024					-65.7217	-64.0262					-64.6921	-64.3913					-65.0542	-62.6673
	-63.9092	-62.5905					-65.7157	-64.0125					-64.6869	-64.3875					-65.0505	-62.6542
	-63.9007	-62.5787					-65.7096	-63.9991					-64.6813	-64.3836					-65.0469	-62.6409
	-63.8919	-62.567					-65.7034	-63.986					-64.6754	-64.3796					-65.0437	-62.6275
	-63.8827	-62.5554					-65.6969	-63.9734					-64.6692	-64.3754					-65.0407	-62.6141
	-63.8733	-62.5437					-65.6902	-63.9611					-64.6628	-64.3711					-65.0378	-62.6008
	-63.8635	-62.5319					-65.6831	-63.9492					-64.6563	-64.3669					-65.035	-62.5879
	-63.8534	-62.52					-65.6756	-63.9377					-64.6497	-64.3627					-65.032	-62.5757
	-63.8431	-62.508					-65.6678	-63.9265					-64.643	-64.3586					-65.0286	-62.5642
	-63.8326	-62.4957					-65.6596	-63.9157					-64.6364	-64.3548					-65.0247	-62.5538
	-63.822	-62.4833					-65.6512	-63.9052					-64.6298	-64.3512					-65.0203	-62.5442
	-63.8114	-62.4705					-65.6425	-63.8949					-64.6234	-64.3479					-65.0151	-62.5356
	-63.8008	-62.4576					-65.6336	-63.8847					-64.617	-64.3449					-65.0095	-62.5275
	-63.7903	-62.4445					-65.6248	-63.8747					-64.6108	-64.3423					-65.0033	-62.5199
	-63.78	-62.4312					-65.616	-63.8648					-64.6047	-64.3399					-64.9967	-62.5121
	-63.7699	-62.4177					-65.6073	-63.855					-64.5987	-64.3379					-64.9898	-62.504
	-63.7601	-62.4042					-65.5989	-63.8452					-64.5928	-64.3362					-64.9825	-62.4952
	-63.7506	-62.3907					-65.5908	-63.8355					-64.587	-64.3346					-64.9748	-62.4855
	-63.7413	-62.3773					-65.583	-63.8259					-64.5811	-64.3333					-64.9667	-62.4747
	-63.7324	-62.364					-65.5755	-63.8164					-64.5753	-64.332					-64.9581	-62.4629
	-63.7237	-62.3508					-65.5684	-63.8072					-64.5695	-64.3307					-64.9491	-62.45
	-63.7152	-62.3378					-65.5616	-63.7981					-64.5637	-64.3293					-64.9395	-62.4363
	-63.707	-62.3251					-65.5551	-63.7893					-64.5579	-64.3278					-64.9296	-62.422
	-63.6989	-62.3126					-65.5488	-63.7808					-64.5522	-64.3261					-64.9194	-62.4072
	-63.6911	-62.3003					-65.5426	-63.7727					-64.5466	-64.324					-64.9092	-62.3921
	-63.6834	-62.2883					-65.5366	-63.7649					-64.5411	-64.3214					-64.8993	-62.3772
	-63.676	-62.2765					-65.5307	-63.7575					-64.5357	-64.3184					-64.8897	-62.3624
	-63.6686	-62.2649					-65.5248	-63.7503					-64.5305	-64.3149					-64.8806	-62.348
	-63.6615	-62.2534					-65.5189	-63.7435					-64.5256	-64.3109					-64.8722	-62.3341
	-63.6545	-62.2421					-65.5131	-63.7369					-64.5208	-64.3063					-64.8645	-62.3208
	-63.6476	-62.231					-65.5072	-63.7306					-64.5162	-64.3012					-64.8576	-62.308
	-63.6409	-62.22					-65.5014	-63.7244					-64.5117	-64.2956					-64.8514	-62.2957
	-63.6343	-62.2091					-65.4955	-63.7183					-64.5073	-64.2897					-64.8458	-62.2836
	-63.6277	-62.1984					-65.4897	-63.7123					-64.503	-64.2835					-64.8408	-62.2717
	-63.6211	-62.1878					-65.484	-63.7063					-64.4987	-64.2771					-64.8363	-62.2596
	-63.6145	-62.1775					-65.4783	-63.7004					-64.4943	-64.2706					-64.8322	-62.2472
	-63.6079	-62.1674					-65.4726	-63.6944					-64.4898	-64.2641					-64.8282	-62.2344
	-63.6012	-62.1577					-65.4671	-63.6884					-64.485	-64.2576					-64.8241	-62.2209
	-63.5944	-62.1483					-65.4615	-63.6823					-64.4799	-64.2511					-64.8198	-62.2069
	-63.5875	-62.1394					-65.456	-63.6762					-64.4745	-64.2448					-64.815	-62.1925
	-63.5806	-62.1309					-65.4506	-63.67					-64.4687	-64.2385					-64.8093	-62.1779
	-63.5735	-62.1229					-65.4451	-63.6639					-64.4625	-64.2324					-64.8026	-62.1636
	-63.5664	-62.1153					-65.4396	-63.6579					-64.4558	-64.2263					-64.7948	-62.1497
	-63.5593	-62.1083					-65.434	-63.652					-64.4487	-64.2203					-64.7859	-62.1366
	-63.5523	-62.1016					-65.4283	-63.6463					-64.4411	-64.2142					-64.7758	-62.1244
	-63.5454	-62.0954					-65.4225	-63.6408					-64.4331	-64.2082					-64.7649	-62.1133
	-63.5385	-62.0895					-65.4166	-63.6355					-64.4249	-64.2023					-64.7535	-62.1031
	-63.5318	-62.0838					-65.4107	-63.6306					-64.4163	-64.1964					-64.7418	-62.0935
	-63.5253	-62.0783					-65.4047	-63.626					-64.4076	-64.1907					-64.7304	-62.084
	-63.5188	-62.0729					-65.3986	-63.6218					-64.3988	-64.1852					-64.7195	-62.0744
	-63.5124	-62.0674					-65.3924	-63.6179					-64.3901	-64.1801					-64.7095	-62.064
	-63.5061	-62.0619					-65.3862	-63.6143					-64.3814	-64.1753					-64.7005	-62.0526
	-63.4997	-62.0562					-65.3801	-63.6109					-64.373	-64.1709					-64.6924	-62.0399
	-63.4932	-62.0503					-65.3739	-63.6076					-64.3648	-64.167					-64.6852	-62.0258
	-63.4865	-62.0442					-65.3677	-63.6045					-64.357	-64.1636					-64.6787	-62.0105
	-63.4796	-62.0378					-65.3615	-63.6013					-64.3495	-64.1606					-64.6725	-61.994
	-63.4725	-62.0312					-65.3554	-63.5981					-64.3424	-64.1578					-64.6664	-61.9768
	-63.4651	-62.0244					-65.3493	-63.5947					-64.3358	-64.1553					-64.6602	-61.9589
	-63.4574	-62.0173					-65.3432	-63.5912					-64.3295	-64.1528					-64.6537	-61.9407
	-63.4495	-62.01					-65.3372	-63.5874					-64.3237	-64.1502					-64.6469	-61.9224
	-63.4414	-62.0026					-65.3314	-63.5834					-64.3182	-64.1473					-64.64	-61.9041
	-63.4331	-61.995					-65.3258	-63.5791					-64.3131	-64.1439					-64.633	-61.886
	-63.4247	-61.9873					-65.3204	-63.5747					-64.3083	-64.14					-64.6262	-61.8681
	-63.4163	-61.9795					-65.3153	-63.5702					-64.3038	-64.1354					-64.6199	-61.8506
	-63.4081	-61.9715					-65.3106	-63.5656					-64.2996	-64.1301					-64.6142	-61.8336
	-63.3999	-61.9635					-65.3062	-63.5611					-64.2956	-64.124					-64.6095	-61.8172
	-63.392	-61.9553					-65.3023	-63.5567					-64.2919	-64.1172					-64.6057	-61.8015
	-63.3844	-61.947					-65.2987	-63.5526					-64.2884	-64.1098					-64.6028	-61.7865
	-63.3771	-61.9385					-65.2955	-63.5487					-64.2851	-64.1018					-64.6007	-61.7725
	-63.3701	-61.9298					-65.2927	-63.5452					-64.282	-64.0934					-64.5991	-61.7592
	-63.3636	-61.921					-65.29	-63.5421					-64.2791	-64.0846					-64.5978	-61.7467
	-63.3573	-61.912					-65.2874	-63.5394					-64.2764	-64.0758					-64.5964	-61.7349
	-63.3515	-61.9029					-65.2849	-63.5372					-64.2739	-64.0669					-64.5946	-61.7234
	-63.3459	-61.8936					-65.2821	-63.5354					-64.2716	-64.0582					-64.5922	-61.7123
	-63.3406	-61.8841					-65.2792	-63.5339					-64.2694	-64.0496					-64.5891	-61.7012
	-63.3356	-61.8746					-65.2758	-63.5328					-64.2673	-64.0414					-64.5852	-61.6902
	-63.3307	-61.865					-65.2719	-63.5319					-64.2654	-64.0334					-64.5806	-61.6792
	-63.326	-61.8554					-65.2676	-63.5311					-64.2634	-64.0257					-64.5755	-61.6682
	-63.3213	-61.8457					-65.2626	-63.5303					-64.2615	-64.0183					-64.5701	-61.6572
	-63.3167	-61.8361					-65.2571	-63.5294					-64.2596	-64.011					-64.5648	-61.6464
	-63.3121	-61.8264					-65.2511	-63.5282					-64.2576	-64.0039					-64.5598	-61.6358
	-63.3074	-61.8168					-65.2445	-63.5267					-64.2554	-63.9966					-64.5554	-61.6253
	-63.3026	-61.8073					-65.2376	-63.5248					-64.2531	-63.9893					-64.5517	-61.6151
	-63.2977	-61.7977					-65.2305	-63.5223					-64.2505	-63.9817					-64.5486	-61.6049
	-63.2927	-61.7882					-65.2232	-63.5192					-64.2478	-63.9737					-64.5461	-61.5949
	-63.2875	-61.7786					-65.2158	-63.5155					-64.2448	-63.9653					-64.5439	-61.5849
	-63.2822	-61.7691					-65.2085	-63.5111					-64.2415	-63.9566					-64.5417	-61.5748
	-63.2766	-61.7596					-65.2015	-63.5061					-64.238	-63.9474					-64.5392	-61.5647
	-63.271	-61.75					-65.1946	-63.5004					-64.2342	-63.938					-64.536	-61.5544
	-63.2651	-61.7405					-65.1881	-63.494					-64.2301	-63.9283					-64.5321	-61.5439
	-63.259	-61.7309					-65.182	-63.4871					-64.2257	-63.9185					-64.5272	-61.5334
	-63.2526	-61.7213					-65.1761	-63.4797					-64.2212	-63.9087					-64.5212	-61.5228
	-63.246	-61.7117					-65.1706	-63.4718					-64.2164	-63.899					-64.5141	-61.5122
	-63.2392	-61.7021					-65.1654	-63.4634					-64.2114	-63.8897					-64.506	-61.5018
	-63.2321	-61.6925					-65.1603	-63.4548					-64.2063	-63.8808					-64.4969	-61.4917
	-63.2247	-61.683					-65.1554	-63.4458					-64.2011	-63.8725					-64.487	-61.4821
	-63.2171	-61.6735					-65.1505	-63.4366					-64.1958	-63.8648					-64.4763	-61.4731
	-63.2092	-61.664					-65.1456	-63.4273					-64.1905	-63.8578					-64.4649	-61.4647
	-63.2011	-61.6546					-65.1406	-63.4179					-64.1852	-63.8515					-64.453	-61.4569
	-63.1929	-61.6453					-65.1353	-63.4083					-64.1799	-63.8458					-64.4408	-61.4497
	-63.1846	-61.6361					-65.1298	-63.3988					-64.1747	-63.8408					-64.4285	-61.443
	-63.1762	-61.627					-65.124	-63.3892					-64.1695	-63.8363					-64.4164	-61.4366
	-63.168	-61.618					-65.1179	-63.3795					-64.1645	-63.8323					-64.4047	-61.4302
	-63.1599	-61.6091					-65.1114	-63.3699					-64.1597	-63.8287					-64.3938	-61.4238
	-63.152	-61.6002					-65.1045	-63.3602					-64.155	-63.8253					-64.3838	-61.4172
	-63.1444	-61.5914					-65.0973	-63.3505					-64.1505	-63.8221					-64.3747	-61.4103
	-63.137	-61.5826					-65.0898	-63.3408					-64.1462	-63.819					-64.3667	-61.4033
	-63.13	-61.5739					-65.082	-63.3311					-64.1421	-63.8159					-64.3596	-61.396
	-63.1232	-61.5651					-65.0739	-63.3214					-64.1381	-63.8127					-64.3533	-61.3888
	-63.1166	-61.5563					-65.0655	-63.3116					-64.1343	-63.8093					-64.3475	-61.3815
	-63.1101	-61.5474					-65.0571	-63.3018					-64.1305	-63.8056					-64.3422	-61.3742
	-63.1038	-61.5386					-65.0485	-63.2921					-64.1267	-63.8017					-64.337	-61.367
	-63.0973	-61.5297					-65.0399	-63.2823					-64.1229	-63.7976					-64.332	-61.3598
	-63.0908	-61.5208					-65.0313	-63.2726					-64.1189	-63.7931					-64.3273	-61.3526
	-63.0841	-61.5121					-65.023	-63.263					-64.1147	-63.7883					-64.3228	-61.3451
	-63.0771	-61.5035					-65.0148	-63.2534					-64.1102	-63.7832					-64.3187	-61.3374
	-63.0698	-61.4951					-65.0071	-63.244					-64.1053	-63.7778					-64.3153	-61.3294
	-63.0622	-61.4871					-64.9997	-63.2348					-64.1	-63.7721					-64.3124	-61.321
	-63.0544	-61.4794					-64.9928	-63.2258					-64.0942	-63.7662					-64.3102	-61.3124
	-63.0463	-61.4722					-64.9865	-63.2171					-64.0879	-63.7601					-64.3084	-61.3037
	-63.038	-61.4655					-64.9807	-63.2087					-64.0811	-63.7538					-64.3069	-61.2951
	-63.0297	-61.4594					-64.9755	-63.2007					-64.0739	-63.7473					-64.3052	-61.2867
	-63.0214	-61.4538					-64.9709	-63.1932					-64.0664	-63.7406					-64.3031	-61.2788
	-63.0133	-61.4488					-64.9668	-63.1863					-64.0586	-63.7338					-64.3003	-61.2714
	-63.0053	-61.4444					-64.9631	-63.1799					-64.0507	-63.7269					-64.2966	-61.2647
	-62.9976	-61.4405					-64.9599	-63.1741					-64.0428	-63.72					-64.2919	-61.2587
	-62.9903	-61.437					-64.9571	-63.169					-64.0351	-63.7129					-64.2864	-61.2533
	-62.9835	-61.4338					-64.9546	-63.1645					-64.0276	-63.7057					-64.2803	-61.2484
	-62.977	-61.431					-64.9522	-63.1606					-64.0205	-63.6985					-64.274	-61.2438
	-62.971	-61.4282					-64.9501	-63.1574					-64.0138	-63.6913					-64.2678	-61.2394
	-62.9653	-61.4256					-64.948	-63.1546					-64.0076	-63.6841					-64.2622	-61.235
	-62.9601	-61.4229					-64.946	-63.1523					-64.002	-63.677					-64.2573	-61.2302
	-62.9552	-61.4201					-64.9441	-63.1504					-63.9968	-63.67					-64.2533	-61.2249
	-62.9506	-61.417					-64.9422	-63.1487					-63.9921	-63.6633					-64.2502	-61.219
	-62.9462	-61.4137					-64.9404	-63.1471					-63.9878	-63.6568					-64.248	-61.2122
	-62.9419	-61.41					-64.9387	-63.1455					-63.9838	-63.6508					-64.2464	-61.2045
	-62.9377	-61.4059					-64.9371	-63.1437					-63.9801	-63.6452					-64.2453	-61.196
	-62.9334	-61.4014					-64.9359	-63.1416					-63.9766	-63.6401					-64.2445	-61.1868
	-62.9292	-61.3965					-64.9349	-63.1391					-63.9731	-63.6355					-64.2436	-61.1771
	-62.9248	-61.3912					-64.9343	-63.136					-63.9697	-63.6315					-64.2426	-61.167
	-62.9203	-61.3855					-64.9342	-63.1324					-63.9662	-63.628					-64.2412	-61.1569
	-62.9156	-61.3796					-64.9346	-63.1281					-63.9626	-63.6251					-64.2392	-61.1469
	-62.9108	-61.3733					-64.9355	-63.1231					-63.959	-63.6227					-64.2366	-61.137
	-62.9059	-61.3668					-64.937	-63.1175					-63.9552	-63.6206					-64.2333	-61.1274
	-62.9008	-61.3601					-64.9391	-63.1113					-63.9513	-63.6188					-64.2292	-61.1177
	-62.8956	-61.3532					-64.9416	-63.1045					-63.9473	-63.6173					-64.2241	-61.1078
	-62.8903	-61.3463					-64.9446	-63.0974					-63.9432	-63.6159					-64.2183	-61.0974
	-62.8851	-61.3393					-64.9478	-63.09					-63.9392	-63.6145					-64.2118	-61.0861
	-62.88	-61.3322					-64.9512	-63.0825					-63.9351	-63.6131					-64.2046	-61.0737
	-62.875	-61.3251					-64.9545	-63.0751					-63.9311	-63.6115					-64.1971	-61.0599
	-62.8702	-61.318					-64.9577	-63.0679					-63.9271	-63.6098					-64.1892	-61.0449
	-62.8657	-61.3109					-64.9604	-63.0611					-63.9232	-63.6079					-64.1813	-61.0289
	-62.8614	-61.3037					-64.9625	-63.0548					-63.9193	-63.6057					-64.1735	-61.0123
	-62.8575	-61.2964					-64.9639	-63.0492					-63.9155	-63.6034					-64.1659	-60.9955
	-62.8539	-61.289					-64.9644	-63.0442					-63.9117	-63.601					-64.1587	-60.9792
	-62.8505	-61.2815					-64.9639	-63.0399					-63.9079	-63.5984					-64.1517	-60.964
	-62.8475	-61.2739					-64.9624	-63.0363					-63.9042	-63.5958					-64.1452	-60.9502
	-62.8446	-61.266					-64.9598	-63.0332					-63.9004	-63.5932					-64.139	-60.9384
	-62.8419	-61.258					-64.9562	-63.0306					-63.8967	-63.5907					-64.133	-60.9285
	-62.8392	-61.2497					-64.9516	-63.0283					-63.8929	-63.5884					-64.1272	-60.9206
	-62.8366	-61.2413					-64.9461	-63.0262					-63.8892	-63.5863					-64.1216	-60.9145
	-62.8339	-61.2326					-64.9398	-63.0242					-63.8855	-63.5843					-64.1159	-60.91
	-62.8312	-61.2239					-64.9328	-63.0221					-63.882	-63.5826					-64.1102	-60.9066
	-62.8283	-61.215					-64.9253	-63.0197					-63.8786	-63.581					-64.1044	-60.9039
	-62.8252	-61.2062					-64.9174	-63.017					-63.8754	-63.5797					-64.0986	-60.9017
	-62.822	-61.1973					-64.9092	-63.0139					-63.8725	-63.5784					-64.0928	-60.8997
	-62.8187	-61.1887					-64.9008	-63.0103					-63.8699	-63.5772					-64.0872	-60.8976
	-62.8154	-61.1802					-64.8924	-63.0062					-63.8677	-63.5759					-64.082	-60.8953
	-62.812	-61.1721					-64.8841	-63.0016					-63.8657	-63.5746					-64.0772	-60.8928
	-62.8086	-61.1644					-64.8761	-62.9965					-63.8641	-63.5732					-64.073	-60.8901
	-62.8053	-61.1572					-64.8684	-62.991					-63.8629	-63.5715					-64.0695	-60.8872
	-62.8022	-61.1505					-64.8612	-62.9852					-63.8619	-63.5696					-64.0665	-60.8842
	-62.7992	-61.1444					-64.8546	-62.9791					-63.8612	-63.5673					-64.064	-60.8812
	-62.7965	-61.1388					-64.8487	-62.9729					-63.8607	-63.5646					-64.0618	-60.8784
	-62.7939	-61.1339					-64.8436	-62.9666					-63.8603	-63.5614					-64.0596	-60.8757
	-62.7914	-61.1295					-64.8392	-62.9603					-63.86	-63.5577					-64.0573	-60.8734
	-62.789	-61.1256					-64.8357	-62.9541					-63.8597	-63.5535					-64.0547	-60.8714
	-62.7866	-61.1221					-64.8329	-62.9481					-63.8592	-63.5486					-64.0515	-60.8697
	-62.784	-61.119					-64.8309	-62.9423					-63.8587	-63.5432					-64.0477	-60.8681
	-62.7813	-61.1161					-64.8293	-62.9368					-63.8579	-63.5371					-64.0434	-60.8665
	-62.7782	-61.1135					-64.8283	-62.9316					-63.8569	-63.5305					-64.0384	-60.8645
	-62.7748	-61.1109					-64.8275	-62.9268					-63.8556	-63.5233					-64.0332	-60.8618
	-62.7708	-61.1083					-64.8267	-62.9223					-63.854	-63.5158					-64.0277	-60.8581
	-62.7664	-61.1057					-64.8259	-62.9182					-63.8521	-63.5079					-64.0223	-60.8532
	-62.7614	-61.103					-64.8248	-62.9143					-63.8499	-63.4999					-64.0171	-60.8469
	-62.7558	-61.1001					-64.8234	-62.9105					-63.8473	-63.4918					-64.0124	-60.8391
	-62.7497	-61.0972					-64.8214	-62.9069					-63.8444	-63.4838					-64.0081	-60.8299
	-62.7432	-61.094					-64.8188	-62.9033					-63.8412	-63.476					-64.0042	-60.8194
	-62.7363	-61.0908					-64.8156	-62.8996					-63.8375	-63.4684					-64.0006	-60.808
	-62.7292	-61.0874					-64.8117	-62.8958					-63.8334	-63.4613					-63.997	-60.796
	-62.7218	-61.0839					-64.8073	-62.8916					-63.8289	-63.4545					-63.9931	-60.7836
	-62.7144	-61.0804					-64.8022	-62.8871					-63.8239	-63.4481					-63.9887	-60.7711
	-62.707	-61.0769					-64.7967	-62.8822					-63.8183	-63.4421					-63.9836	-60.7588
	-62.6997	-61.0734					-64.7908	-62.8769					-63.8123	-63.4365					-63.9776	-60.7468
	-62.6926	-61.07					-64.7846	-62.8713					-63.8058	-63.4312					-63.9709	-60.7355
	-62.6857	-61.0666					-64.7781	-62.8653					-63.799	-63.4263					-63.9633	-60.7247
	-62.6791	-61.0633					-64.7715	-62.8591					-63.7918	-63.4216					-63.9553	-60.7146
	-62.6727	-61.0601					-64.7649	-62.8529					-63.7844	-63.4171					-63.9467	-60.7052
	-62.6667	-61.0569					-64.7582	-62.8467					-63.777	-63.4128					-63.938	-60.6962
	-62.6608	-61.0538					-64.7516	-62.8407					-63.7696	-63.4087					-63.9292	-60.6877
	-62.6552	-61.0506					-64.745	-62.8351					-63.7624	-63.4048					-63.9206	-60.6795
	-62.6499	-61.0473					-64.7385	-62.83					-63.7556	-63.4011					-63.9121	-60.6714
	-62.6446	-61.0439					-64.7321	-62.8253					-63.7491	-63.3975					-63.9041	-60.6632
	-62.6395	-61.0402					-64.7257	-62.8213					-63.7431	-63.3942					-63.8967	-60.655
	-62.6346	-61.0363					-64.7194	-62.8178					-63.7377	-63.3912					-63.8901	-60.6467
	-62.6297	-61.032					-64.7131	-62.8148					-63.7327	-63.3883					-63.8845	-60.6383
	-62.6249	-61.0273					-64.7068	-62.8123					-63.7283	-63.3858					-63.8799	-60.6299
	-62.6202	-61.0223					-64.7006	-62.8101					-63.7242	-63.3834					-63.8766	-60.6216
	-62.6155	-61.0169					-64.6944	-62.8082					-63.7205	-63.3813					-63.8743	-60.6136
	-62.611	-61.0112					-64.6883	-62.8064					-63.7171	-63.3793					-63.873	-60.606
	-62.6066	-61.0051					-64.6824	-62.8047					-63.7138	-63.3775					-63.8722	-60.5989
	-62.6022	-60.9988					-64.6766	-62.803					-63.7106	-63.3759					-63.8714	-60.5924
	-62.598	-60.9923					-64.6711	-62.8012					-63.7074	-63.3743					-63.8703	-60.5864
	-62.594	-60.9857					-64.6658	-62.7994					-63.7042	-63.3728					-63.8684	-60.581
	-62.5901	-60.9789					-64.6609	-62.7976					-63.701	-63.3714					-63.8652	-60.576
	-62.5863	-60.9721					-64.6563	-62.7959					-63.6978	-63.3699					-63.8607	-60.5712
	-62.5828	-60.9651					-64.652	-62.7942					-63.6945	-63.3683					-63.8548	-60.5667
	-62.5794	-60.9581					-64.6479	-62.7928					-63.6913	-63.3666					-63.848	-60.5622
	-62.5763	-60.9509					-64.6441	-62.7915					-63.6881	-63.3648					-63.8406	-60.5577
	-62.5734	-60.9436					-64.6405	-62.7906					-63.6851	-63.3627					-63.8333	-60.5533
	-62.5709	-60.9361					-64.637	-62.79					-63.6823	-63.3604					-63.8265	-60.5488
	-62.5686	-60.9285					-64.6336	-62.7897					-63.6798	-63.3577					-63.821	-60.5441
	-62.5665	-60.9207					-64.6301	-62.7897					-63.6776	-63.3545					-63.8169	-60.5393
	-62.5648	-60.9128					-64.6265	-62.79					-63.6757	-63.3509					-63.8146	-60.534
	-62.5633	-60.9048					-64.6227	-62.7905					-63.6743	-63.3466					-63.8138	-60.5281
	-62.562	-60.8967					-64.6189	-62.7911					-63.6731	-63.3418					-63.8144	-60.5213
	-62.5607	-60.8886					-64.6148	-62.7918					-63.6724	-63.3364					-63.8158	-60.5135
	-62.5595	-60.8806					-64.6107	-62.7924					-63.672	-63.3304					-63.8176	-60.5046
	-62.5582	-60.8727					-64.6064	-62.7929					-63.6717	-63.3238					-63.8193	-60.4946
	-62.5567	-60.8651					-64.602	-62.7931					-63.6716	-63.3167					-63.8204	-60.4835
	-62.5549	-60.8578					-64.5976	-62.793					-63.6716	-63.3093					-63.8206	-60.4717
	-62.5527	-60.851					-64.5933	-62.7925					-63.6714	-63.3016					-63.8197	-60.4596
	-62.5499	-60.8446					-64.5891	-62.7915					-63.6711	-63.2938					-63.8175	-60.4475
	-62.5466	-60.8387					-64.585	-62.79					-63.6704	-63.2861					-63.814	-60.436
	-62.5427	-60.8333					-64.5812	-62.788					-63.6693	-63.2786					-63.8093	-60.4253
	-62.5382	-60.8285					-64.5776	-62.7854					-63.6678	-63.2714					-63.8036	-60.4159
	-62.5332	-60.8242					-64.5744	-62.7823					-63.6657	-63.2647					-63.797	-60.4077
	-62.5276	-60.8204					-64.5716	-62.7787					-63.6631	-63.2584					-63.7898	-60.4008
	-62.5215	-60.8171					-64.5691	-62.7746					-63.66	-63.2528					-63.7823	-60.395
	-62.5152	-60.8142					-64.567	-62.7701					-63.6563	-63.2477					-63.7747	-60.3899
	-62.5085	-60.8116					-64.5652	-62.7653					-63.6522	-63.2432					-63.7673	-60.3851
	-62.5018	-60.8093					-64.5639	-62.7602					-63.6477	-63.2393					-63.7604	-60.3803
	-62.495	-60.8073					-64.5627	-62.7549					-63.643	-63.2359					-63.7542	-60.3752
	-62.4883	-60.8055					-64.5619	-62.7495					-63.638	-63.233					-63.7489	-60.3697
	-62.4818	-60.8038					-64.5611	-62.7441					-63.6329	-63.2305					-63.7444	-60.3637
	-62.4755	-60.8023					-64.5605	-62.7387					-63.6278	-63.2284					-63.7406	-60.3575
	-62.4693	-60.8007					-64.5598	-62.7334					-63.6227	-63.2265					-63.7375	-60.3513
	-62.4634	-60.7992					-64.559	-62.7283					-63.6177	-63.2249					-63.7348	-60.3453
	-62.4577	-60.7976					-64.5581	-62.7233					-63.6129	-63.2235					-63.7322	-60.3399
	-62.4522	-60.7959					-64.557	-62.7186					-63.6083	-63.2222					-63.7296	-60.3352
	-62.4468	-60.7941					-64.5556	-62.7141					-63.6039	-63.221					-63.7267	-60.3311
	-62.4414	-60.7919					-64.554	-62.7098					-63.5998	-63.2199					-63.7234	-60.3276
	-62.4361	-60.7895					-64.5523	-62.7058					-63.5959	-63.2188					-63.7195	-60.3242
	-62.4308	-60.7867					-64.5503	-62.7021					-63.5923	-63.2178					-63.7151	-60.3208
	-62.4254	-60.7835					-64.5482	-62.6986					-63.5889	-63.2169					-63.7104	-60.3169
	-62.4201	-60.7797					-64.5459	-62.6953					-63.5858	-63.216					-63.7054	-60.3123
	-62.4148	-60.7755					-64.5436	-62.6922					-63.5829	-63.2153					-63.7005	-60.307
	-62.4095	-60.7707					-64.5413	-62.6894					-63.5802	-63.2146					-63.6959	-60.3007
	-62.4044	-60.7653					-64.539	-62.6866					-63.5775	-63.2141					-63.6918	-60.2937
	-62.3994	-60.7594					-64.5368	-62.6841					-63.575	-63.2138					-63.6885	-60.2861
	-62.3948	-60.753					-64.5346	-62.6817					-63.5724	-63.2137					-63.6858	-60.2781
	-62.3904	-60.7463					-64.5324	-62.6795					-63.5697	-63.2139					-63.684	-60.27
	-62.3865	-60.7393					-64.5304	-62.6775					-63.5669	-63.2143					-63.6827	-60.2621
	-62.383	-60.7321					-64.5284	-62.6756					-63.564	-63.2149					-63.6818	-60.2544
	-62.38	-60.725					-64.5265	-62.674					-63.5608	-63.2158					-63.681	-60.2472
	-62.3774	-60.7181					-64.5247	-62.6726					-63.5575	-63.2169					-63.6802	-60.2404
	-62.3753	-60.7116					-64.523	-62.6714					-63.5539	-63.2182					-63.6789	-60.2342
	-62.3736	-60.7056					-64.5214	-62.6704					-63.5501	-63.2197					-63.6769	-60.2286
	-62.3723	-60.7003					-64.5199	-62.6696					-63.5461	-63.2215					-63.674	-60.2236
	-62.3712	-60.6957					-64.5186	-62.6691					-63.542	-63.2233					-63.67	-60.2192
	-62.3704	-60.6919					-64.5173	-62.6687					-63.5376	-63.2253					-63.6649	-60.2156
	-62.3697	-60.6891					-64.516	-62.6685					-63.5332	-63.2273					-63.6585	-60.2128
	-62.369	-60.687					-64.5149	-62.6684					-63.5287	-63.2292					-63.651	-60.2108
	-62.3684	-60.6857					-64.5137	-62.6683					-63.5242	-63.2311					-63.6425	-60.2096
	-62.3677	-60.6851					-64.5126	-62.6681					-63.5197	-63.2329					-63.6333	-60.2091
	-62.3668	-60.6851					-64.5114	-62.6679					-63.5151	-63.2344					-63.6238	-60.2093
	-62.3658	-60.6854					-64.5101	-62.6673					-63.5106	-63.2355					-63.6143	-60.21
	-62.3646	-60.686					-64.5087	-62.6665					-63.5061	-63.2362					-63.6053	-60.2111
	-62.363	-60.6867					-64.5071	-62.6652					-63.5017	-63.2364					-63.5972	-60.2123
	-62.3612	-60.6873					-64.5053	-62.6635					-63.4973	-63.236					-63.5906	-60.2133
	-62.3591	-60.6878					-64.5033	-62.6612					-63.4929	-63.235					-63.5855	-60.2139
	-62.3566	-60.688					-64.501	-62.6583					-63.4887	-63.2334					-63.5824	-60.2138
	-62.3539	-60.6879					-64.4984	-62.6549					-63.4845	-63.2312					-63.581	-60.2127
	-62.3507	-60.6874					-64.4955	-62.651					-63.4805	-63.2284					-63.5814	-60.2105
	-62.3472	-60.6865					-64.4921	-62.6467					-63.4765	-63.2251					-63.5832	-60.2069
	-62.3434	-60.6851					-64.4883	-62.642					-63.4728	-63.2213					-63.586	-60.2021
	-62.3393	-60.6833					-64.4839	-62.6372					-63.4692	-63.2174					-63.5894	-60.1961
	-62.3349	-60.6811					-64.479	-62.6323					-63.4658	-63.2133					-63.5928	-60.1891
	-62.3302	-60.6785					-64.4733	-62.6275					-63.4626	-63.2092					-63.5957	-60.1816
	-62.3252	-60.6755					-64.467	-62.6229					-63.4596	-63.2053					-63.5977	-60.1739
	-62.3201	-60.6722					-64.4599	-62.6187					-63.4569	-63.2016					-63.5985	-60.1664
	-62.3147	-60.6686					-64.4521	-62.6149					-63.4544	-63.1983					-63.5978	-60.1594
	-62.3092	-60.6648					-64.4438	-62.6117					-63.4522	-63.1955					-63.5954	-60.1531
	-62.3036	-60.661					-64.4349	-62.609					-63.4502	-63.1933					-63.5916	-60.1478
	-62.298	-60.6572					-64.4257	-62.6068					-63.4485	-63.1915					-63.5864	-60.1433
	-62.2924	-60.6534					-64.4163	-62.6051					-63.447	-63.1903					-63.5801	-60.1395
	-62.2869	-60.6499					-64.4069	-62.6038					-63.4456	-63.1894					-63.573	-60.1364
	-62.2816	-60.6467					-64.3979	-62.6029					-63.4443	-63.189					-63.5654	-60.1338
	-62.2764	-60.6439					-64.3894	-62.6022					-63.4432	-63.1888					-63.5576	-60.1314
	-62.2716	-60.6415					-64.3815	-62.6018					-63.442	-63.1887					-63.5498	-60.1293
	-62.2671	-60.6396					-64.3746	-62.6015					-63.4409	-63.1887					-63.5421	-60.1275
	-62.2629	-60.6381					-64.3686	-62.6013					-63.4397	-63.1885					-63.5346	-60.126
	-62.2592	-60.6372					-64.3638	-62.6011					-63.4385	-63.1881					-63.527	-60.1249
	-62.2558	-60.6366					-64.36	-62.6009					-63.4371	-63.1874					-63.5194	-60.1243
	-62.2529	-60.6363					-64.3573	-62.6007					-63.4357	-63.1864					-63.5115	-60.1243
	-62.2504	-60.6362					-64.3557	-62.6004					-63.4341	-63.185					-63.5035	-60.1246
	-62.2483	-60.6363					-64.3548	-62.5999					-63.4323	-63.1832					-63.4952	-60.1251
	-62.2465	-60.6363					-64.3547	-62.5993					-63.4305	-63.1812					-63.487	-60.1255
	-62.245	-60.6364					-64.3551	-62.5986					-63.4285	-63.1789					-63.479	-60.1252
	-62.2438	-60.6362					-64.3559	-62.5976					-63.4265	-63.1764					-63.4716	-60.124
	-62.2428	-60.6359					-64.3569	-62.5964					-63.4245	-63.1738					-63.465	-60.1214
	-62.2419	-60.6354					-64.358	-62.5949					-63.4225	-63.1711					-63.4597	-60.1173
	-62.2411	-60.6346					-64.3592	-62.5932					-63.4205	-63.1685					-63.4557	-60.1117
	-62.2404	-60.6337					-64.3602	-62.5911					-63.4186	-63.166					-63.4531	-60.1048
	-62.2397	-60.6326					-64.3612	-62.5888					-63.4169	-63.1636					-63.452	-60.097
	-62.239	-60.6314					-64.3622	-62.5862					-63.4153	-63.1613					-63.4522	-60.0888
	-62.2383	-60.6302					-64.3631	-62.5834					-63.4138	-63.1592					-63.4535	-60.0806
	-62.2374	-60.629					-64.3642	-62.5804					-63.4124	-63.1572					-63.4558	-60.0729
	-62.2365	-60.6279					-64.3654	-62.5773					-63.4111	-63.1554					-63.4587	-60.0661
	-62.2354	-60.6269					-64.3668	-62.5742					-63.4099	-63.1537					-63.462	-60.0603
	-62.2341	-60.626					-64.3685	-62.571					-63.4087	-63.1522					-63.4652	-60.0556
	-62.2326	-60.6252					-64.3705	-62.5678					-63.4075	-63.1508					-63.4681	-60.0519
	-62.2309	-60.6245					-64.3728	-62.5648					-63.4062	-63.1495					-63.4703	-60.0489
	-62.2289	-60.6239					-64.3753	-62.5618					-63.4049	-63.1483					-63.4714	-60.0464
	-62.2267	-60.6232					-64.3781	-62.559					-63.4035	-63.147					-63.4712	-60.0442
	-62.2242	-60.6224					-64.3809	-62.5563					-63.4019	-63.1456					-63.4694	-60.042
	-62.2214	-60.6215					-64.3837	-62.5538					-63.4003	-63.1441					-63.4659	-60.04
	-62.2184	-60.6204					-64.3864	-62.5513					-63.3985	-63.1422					-63.4608	-60.0379
	-62.2152	-60.6191					-64.3887	-62.549					-63.3967	-63.1401					-63.4542	-60.0358
	-62.2119	-60.6176					-64.3907	-62.5467					-63.3948	-63.1374					-63.4465	-60.0339
	-62.2084	-60.6158					-64.3921	-62.5445					-63.3927	-63.1342					-63.4379	-60.0321
	-62.2049	-60.6137					-64.393	-62.5423					-63.3904	-63.1304					-63.429	-60.0305
	-62.2013	-60.6114					-64.3931	-62.5401					-63.3879	-63.1259					-63.4201	-60.029
	-62.1978	-60.609					-64.3926	-62.5379					-63.3851	-63.1208					-63.4117	-60.0276
	-62.1944	-60.6063					-64.3914	-62.5358					-63.3819	-63.1149					-63.4042	-60.0263
	-62.1911	-60.6035					-64.3895	-62.5338					-63.3783	-63.1085					-63.3978	-60.0248
	-62.1879	-60.6005					-64.3871	-62.5319					-63.3743	-63.1016					-63.3927	-60.0231
	-62.1849	-60.5974					-64.3841	-62.5302					-63.3699	-63.0943					-63.3889	-60.0211
	-62.182	-60.5942					-64.3808	-62.5287					-63.3649	-63.0866					-63.3864	-60.0188
	-62.1791	-60.5909					-64.3772	-62.5275					-63.3596	-63.0789					-63.3849	-60.0161
	-62.1764	-60.5874					-64.3734	-62.5266					-63.3538	-63.0711					-63.3842	-60.0131
	-62.1737	-60.5838					-64.3694	-62.5261					-63.3478	-63.0634					-63.3839	-60.01
	-62.171	-60.5801					-64.3654	-62.526					-63.3416	-63.056					-63.3838	-60.0067
	-62.1683	-60.5763					-64.3614	-62.5262					-63.3353	-63.049					-63.3835	-60.0035
	-62.1655	-60.5723					-64.3573	-62.5267					-63.329	-63.0424					-63.3826	-60.0004
	-62.1626	-60.5683					-64.3533	-62.5274					-63.3228	-63.0362					-63.381	-59.9974
	-62.1596	-60.5641					-64.3494	-62.5284					-63.3168	-63.0306					-63.3786	-59.9947
	-62.1565	-60.5599					-64.3454	-62.5295					-63.311	-63.0255					-63.3753	-59.9922
	-62.1532	-60.5555					-64.3414	-62.5307					-63.3054	-63.021					-63.3714	-59.9898
	-62.1499	-60.5512					-64.3374	-62.5319					-63.3001	-63.017					-63.367	-59.9875
	-62.1466	-60.5468					-64.3334	-62.533					-63.2951	-63.0135					-63.3624	-59.9851
	-62.1433	-60.5424					-64.3294	-62.5339					-63.2904	-63.0105					-63.3579	-59.9826
	-62.14	-60.5381					-64.3253	-62.5347					-63.286	-63.008					-63.3537	-59.9799
	-62.137	-60.5339					-64.3213	-62.5353					-63.2818	-63.006					-63.3499	-59.9771
	-62.1343	-60.5298					-64.3172	-62.5355					-63.2779	-63.0043					-63.3467	-59.9742
	-62.1318	-60.526					-64.3132	-62.5354					-63.2743	-63.0029					-63.3439	-59.9713
	-62.1297	-60.5223					-64.3093	-62.535					-63.271	-63.0018					-63.3415	-59.9685
	-62.128	-60.519					-64.3055	-62.5341					-63.2681	-63.0009					-63.3393	-59.966
	-62.1268	-60.5161					-64.3018	-62.5329					-63.2656	-63					-63.3372	-59.9637
	-62.1259	-60.5135					-64.2985	-62.5313					-63.2635	-62.9991					-63.3349	-59.9618
	-62.1253	-60.5114					-64.2953	-62.5293					-63.2618	-62.998					-63.3326	-59.96
	-62.125	-60.5098					-64.2925	-62.527					-63.2606	-62.9967					-63.3303	-59.9583
	-62.1249	-60.5086					-64.2901	-62.5244					-63.2598	-62.9952					-63.3279	-59.9564
	-62.1249	-60.5078					-64.2881	-62.5216					-63.2593	-62.9933					-63.3256	-59.9539
	-62.1248	-60.5075					-64.2866	-62.5186					-63.2591	-62.9911					-63.3236	-59.9509
	-62.1246	-60.5077					-64.2856	-62.5157					-63.2592	-62.9886					-63.322	-59.947
	-62.1241	-60.5081					-64.285	-62.5127					-63.2594	-62.9858					-63.3207	-59.9424
	-62.1234	-60.5089					-64.285	-62.51					-63.2597	-62.9829					-63.3199	-59.9371
	-62.1222	-60.5099					-64.2854	-62.5074					-63.2599	-62.9798					-63.3196	-59.9313
	-62.1207	-60.5111					-64.2862	-62.5052					-63.2598	-62.9767					-63.3196	-59.9251
	-62.1188	-60.5124					-64.2874	-62.5033					-63.2595	-62.9738					-63.32	-59.9189
	-62.1165	-60.5138					-64.2889	-62.5019					-63.2588	-62.9711					-63.3206	-59.9127
	-62.1138	-60.5151					-64.2906	-62.5009					-63.2577	-62.9688					-63.3216	-59.9066
	-62.1108	-60.5163					-64.2924	-62.5005					-63.2561	-62.9669					-63.3227	-59.9007
	-62.1076	-60.5173					-64.2942	-62.5006					-63.2539	-62.9654					-63.324	-59.8948
	-62.1042	-60.5181					-64.2959	-62.5012					-63.2513	-62.9645					-63.3253	-59.889
	-62.1007	-60.5187					-64.2973	-62.5024					-63.2482	-62.9641					-63.3268	-59.8831
	-62.0971	-60.519					-64.2985	-62.5041					-63.2446	-62.9642					-63.3283	-59.8771
	-62.0935	-60.519					-64.2993	-62.5063					-63.2407	-62.9647					-63.3297	-59.8711
	-62.0899	-60.5188					-64.2996	-62.509					-63.2365	-62.9656					-63.3312	-59.865
	-62.0864	-60.5183					-64.2995	-62.512					-63.2322	-62.9668					-63.3326	-59.859
	-62.0829	-60.5176					-64.2987	-62.5153					-63.2278	-62.9683					-63.3339	-59.8531
	-62.0795	-60.5168					-64.2975	-62.5188					-63.2236	-62.9701					-63.3352	-59.8474
	-62.0762	-60.5159					-64.2956	-62.5222					-63.2195	-62.972					-63.3363	-59.842
	-62.0729	-60.515					-64.2932	-62.5256					-63.2156	-62.9741					-63.3371	-59.837
	-62.0696	-60.514					-64.2902	-62.5286					-63.2122	-62.9764					-63.3376	-59.8325
	-62.0664	-60.5131					-64.2867	-62.5313					-63.2091	-62.9789					-63.3374	-59.8285
	-62.0633	-60.5123					-64.2828	-62.5334					-63.2065	-62.9815					-63.3364	-59.8251
	-62.0602	-60.5115					-64.2784	-62.5349					-63.2044	-62.9842					-63.3346	-59.8223
	-62.0571	-60.5108					-64.2738	-62.5357					-63.2027	-62.987					-63.3319	-59.8202
	-62.0541	-60.5101					-64.2689	-62.5359					-63.2014	-62.9898					-63.3282	-59.8188
	-62.0512	-60.5095					-64.2638	-62.5353					-63.2005	-62.9925					-63.3236	-59.8181
	-62.0485	-60.5088					-64.2587	-62.5342					-63.1998	-62.995					-63.3182	-59.818
	-62.0459	-60.508					-64.2535	-62.5326					-63.1994	-62.9972					-63.3123	-59.8186
	-62.0434	-60.507					-64.2485	-62.5307					-63.199	-62.9989					-63.3059	-59.8198
	-62.0412	-60.5059					-64.2437	-62.5286					-63.1986	-63.0001					-63.2993	-59.8216
	-62.0391	-60.5045					-64.2391	-62.5265					-63.1979	-63.0006					-63.2928	-59.8238
	-62.0372	-60.5028					-64.2349	-62.5244					-63.1969	-63.0004					-63.2864	-59.8262
	-62.0354	-60.5009					-64.231	-62.5226					-63.1955	-62.9995					-63.2805	-59.8288
	-62.0338	-60.4986					-64.2276	-62.5211					-63.1935	-62.9979					-63.2751	-59.8313
	-62.0323	-60.496					-64.2246	-62.52					-63.1908	-62.9957					-63.2704	-59.8333
	-62.0308	-60.4931					-64.2221	-62.5193					-63.1873	-62.993					-63.2667	-59.8347
	-62.0293	-60.49					-64.2202	-62.519					-63.183	-62.99					-63.2638	-59.8351
	-62.0279	-60.4866					-64.2186	-62.5191					-63.1779	-62.9868					-63.262	-59.8345
	-62.0263	-60.4832					-64.2175	-62.5194					-63.172	-62.9836					-63.2611	-59.8325
	-62.0247	-60.4797					-64.2168	-62.5199					-63.1654	-62.9805					-63.2611	-59.8294
	-62.0229	-60.4762					-64.2164	-62.5205					-63.1582	-62.9777					-63.2618	-59.825
	-62.0211	-60.4729					-64.2162	-62.5211					-63.1505	-62.9754					-63.2632	-59.8197
	-62.0192	-60.4699					-64.2161	-62.5218					-63.1425	-62.9734					-63.265	-59.8136
	-62.0171	-60.4672					-64.2161	-62.5223					-63.1343	-62.972					-63.2669	-59.8069
	-62.0151	-60.4649					-64.2159	-62.5229					-63.1262	-62.971					-63.2687	-59.8
	-62.0129	-60.4631					-64.2156	-62.5233					-63.1183	-62.9705					-63.2701	-59.793
	-62.0108	-60.4619					-64.215	-62.5238					-63.1106	-62.9704					-63.2707	-59.786
	-62.0086	-60.4612					-64.2141	-62.5243					-63.1035	-62.9705					-63.2705	-59.7792
	-62.0064	-60.461					-64.2128	-62.5248					-63.0968	-62.9708					-63.2691	-59.7726
	-62.0043	-60.4614					-64.2111	-62.5255					-63.0908	-62.9712					-63.2666	-59.7664
	-62.0021	-60.4623					-64.209	-62.5262					-63.0853	-62.9715					-63.2629	-59.7604
	-61.9998	-60.4636					-64.2067	-62.527					-63.0803	-62.9716					-63.2582	-59.7547
	-61.9975	-60.4653					-64.204	-62.5279					-63.0759	-62.9715					-63.2527	-59.7491
	-61.9951	-60.4673					-64.2011	-62.5287					-63.0719	-62.9711					-63.2467	-59.7437
	-61.9926	-60.4695					-64.198	-62.5295					-63.0683	-62.9702					-63.2404	-59.7384
	-61.9899	-60.4718					-64.1948	-62.5302					-63.0649	-62.9689					-63.2341	-59.7331
	-61.987	-60.4741					-64.1915	-62.5305					-63.0618	-62.9671					-63.2281	-59.7279
	-61.9839	-60.4764					-64.1883	-62.5306					-63.0588	-62.9648					-63.2224	-59.7227
	-61.9806	-60.4785					-64.1851	-62.5301					-63.0558	-62.962					-63.2169	-59.7177
	-61.9771	-60.4804					-64.1819	-62.5292					-63.0529	-62.9587					-63.2118	-59.7127
	-61.9734	-60.4821					-64.1787	-62.5277					-63.05	-62.955					-63.2068	-59.7081
	-61.9694	-60.4834					-64.1756	-62.5257					-63.0471	-62.9508					-63.202	-59.7038
	-61.9652	-60.4845					-64.1726	-62.5231					-63.0442	-62.9462					-63.1973	-59.7
	-61.9608	-60.4852					-64.1696	-62.5201					-63.0411	-62.9413					-63.1926	-59.6969
	-61.9562	-60.4856					-64.1666	-62.5166					-63.038	-62.9362					-63.1879	-59.6945
	-61.9514	-60.4857					-64.1638	-62.5128					-63.0348	-62.9309					-63.1834	-59.6931
	-61.9465	-60.4854					-64.1611	-62.5089					-63.0315	-62.9254					-63.1792	-59.6927
	-61.9416	-60.4848					-64.1586	-62.5048					-63.0281	-62.9201					-63.1753	-59.6933
	-61.9366	-60.4839					-64.1564	-62.5008					-63.0246	-62.9148					-63.1718	-59.6949
	-61.9317	-60.4828					-64.1546	-62.497					-63.021	-62.9099					-63.169	-59.6974
	-61.9269	-60.4813					-64.1533	-62.4935					-63.0174	-62.9053					-63.1667	-59.7006
	-61.9223	-60.4795					-64.1525	-62.4903					-63.0138	-62.9013					-63.1651	-59.7044
	-61.918	-60.4775					-64.1522	-62.4876					-63.0103	-62.898					-63.1641	-59.7086
	-61.914	-60.4752					-64.1526	-62.4855					-63.007	-62.8955					-63.1636	-59.7129
	-61.9104	-60.4728					-64.1535	-62.4839					-63.0039	-62.8938					-63.1635	-59.7172
	-61.9072	-60.4701					-64.155	-62.4829					-63.0012	-62.893					-63.1636	-59.7211
	-61.9044	-60.4673					-64.157	-62.4824					-62.9988	-62.8932					-63.1637	-59.7245
	-61.902	-60.4644					-64.1593	-62.4825					-62.9968	-62.8943					-63.1638	-59.7271
	-61.8999	-60.4616					-64.1618	-62.4831					-62.9953	-62.8961					-63.1636	-59.729
	-61.8982	-60.4588					-64.1644	-62.4841					-62.9943	-62.8987					-63.1632	-59.7298
	-61.8968	-60.4562					-64.1669	-62.4855					-62.9937	-62.9018					-63.1626	-59.7297
	-61.8955	-60.4538					-64.1692	-62.487					-62.9934	-62.9052					-63.1617	-59.7287
	-61.8943	-60.4518					-64.1713	-62.4887					-62.9934	-62.9087					-63.1607	-59.7269
	-61.8932	-60.4501					-64.173	-62.4904					-62.9935	-62.9121					-63.1597	-59.7243
	-61.8921	-60.4488					-64.1743	-62.492					-62.9937	-62.9152					-63.1588	-59.7211
	-61.8908	-60.4479					-64.1753	-62.4934					-62.9939	-62.9177					-63.1582	-59.7174
	-61.8895	-60.4475					-64.1759	-62.4946					-62.9939	-62.9195					-63.1578	-59.7133
	-61.8881	-60.4475					-64.1761	-62.4956					-62.9936	-62.9206					-63.1578	-59.7088
	-61.8866	-60.4479					-64.176	-62.4962					-62.9931	-62.9208					-63.1579	-59.7039
	-61.8851	-60.4487					-64.1757	-62.4966					-62.9924	-62.9202					-63.1579	-59.6986
	-61.8835	-60.45					-64.1753	-62.4967					-62.9913	-62.9187					-63.1576	-59.693
	-61.8819	-60.4515					-64.1748	-62.4967					-62.99	-62.9166					-63.1568	-59.6872
	-61.8804	-60.4533					-64.1743	-62.4965					-62.9885	-62.9139					-63.1551	-59.6812
	-61.879	-60.4553					-64.1737	-62.4964					-62.9868	-62.9108					-63.1525	-59.6753
	-61.8777	-60.4574					-64.1733	-62.4963					-62.985	-62.9074					-63.1488	-59.6696
	-61.8765	-60.4596					-64.1729	-62.4963					-62.9831	-62.9038					-63.1441	-59.6643
	-61.8755	-60.4617					-64.1727	-62.4965					-62.981	-62.9003					-63.1384	-59.6593
	-61.8747	-60.4637					-64.1725	-62.4969					-62.9789	-62.8968					-63.1318	-59.6548
	-61.8741	-60.4655					-64.1725	-62.4975					-62.9767	-62.8934					-63.1247	-59.6507
	-61.8736	-60.4669					-64.1724	-62.4983					-62.9743	-62.8902					-63.1172	-59.647
	-61.8732	-60.468					-64.1723	-62.4991					-62.9717	-62.887					-63.1096	-59.6436
	-61.8729	-60.4686					-64.1722	-62.5					-62.9689	-62.8839					-63.102	-59.6403
	-61.8727	-60.4688					-64.1719	-62.5008					-62.9658	-62.8807					-63.0948	-59.637
	-61.8725	-60.4685					-64.1714	-62.5014					-62.9626	-62.8773					-63.0882	-59.6337
	-61.8722	-60.4677					-64.1706	-62.5017					-62.9592	-62.8736					-63.0824	-59.6304
	-61.872	-60.4666					-64.1695	-62.5016					-62.9557	-62.8696					-63.0778	-59.6269
	-61.8718	-60.4651					-64.1681	-62.501					-62.9521	-62.8651					-63.0744	-59.6232
	-61.8715	-60.4633					-64.1663	-62.4999					-62.9486	-62.8602					-63.0725	-59.6194
	-61.8713	-60.4615					-64.1641	-62.4983					-62.9451	-62.8549					-63.072	-59.6155
	-61.8711	-60.4595					-64.1617	-62.4963					-62.9418	-62.8491					-63.0728	-59.6118
	-61.8709	-60.4577					-64.1589	-62.4938					-62.9386	-62.843					-63.0746	-59.6083
	-61.8708	-60.456					-64.1559	-62.4909					-62.9357	-62.8365					-63.0773	-59.6052
	-61.8708	-60.4545					-64.1527	-62.4879					-62.933	-62.8299					-63.0802	-59.6029
	-61.8709	-60.4532					-64.1494	-62.4848					-62.9306	-62.8232					-63.0831	-59.6014
	-61.8711	-60.4523					-64.1461	-62.4818					-62.9284	-62.8165					-63.0854	-59.6008
	-61.8714	-60.4517					-64.1427	-62.4791					-62.9264	-62.8098					-63.0868	-59.6014
	-61.8717	-60.4514					-64.1395	-62.4766					-62.9246	-62.8032					-63.0871	-59.6029
	-61.872	-60.4513					-64.1364	-62.4747					-62.9231	-62.7967					-63.0861	-59.6054
	-61.8724	-60.4515					-64.1334	-62.4733					-62.9219	-62.7904					-63.0838	-59.6086
	-61.8726	-60.4518					-64.1307	-62.4725					-62.921	-62.7842					-63.0805	-59.6123
	-61.8728	-60.4522					-64.1281	-62.4723					-62.9204	-62.7781					-63.0763	-59.6163
	-61.8729	-60.4528					-64.1258	-62.4726					-62.9202	-62.772					-63.0718	-59.6203
	-61.8727	-60.4533					-64.1237	-62.4735					-62.9203	-62.7659					-63.0672	-59.6242
	-61.8724	-60.4538					-64.1217	-62.4748					-62.9208	-62.7599					-63.0629	-59.6277
	-61.8719	-60.4543					-64.12	-62.4764					-62.9217	-62.7539					-63.0593	-59.6307
	-61.8711	-60.4546					-64.1184	-62.4783					-62.9228	-62.7478					-63.0566	-59.6332
	-61.87	-60.4548					-64.1169	-62.4803					-62.9241	-62.7419					-63.0547	-59.6351
	-61.8688	-60.4549					-64.1155	-62.4822					-62.9255	-62.736					-63.0537	-59.6364
	-61.8673	-60.4547					-64.1142	-62.484					-62.9268	-62.7303					-63.0534	-59.637
	-61.8655	-60.4543					-64.1129	-62.4856					-62.928	-62.7248					-63.0535	-59.6367
	-61.8636	-60.4536					-64.1116	-62.4869					-62.9289	-62.7196					-63.0538	-59.6356
	-61.8615	-60.4528					-64.1104	-62.4879					-62.9295	-62.7149					-63.0542	-59.6334
	-61.8592	-60.4517					-64.1091	-62.4886					-62.9295	-62.7106					-63.0544	-59.63
	-61.8568	-60.4505					-64.1078	-62.4889					-62.9291	-62.7068					-63.0545	-59.6254
	-61.8542	-60.4491					-64.1065	-62.4889					-62.9282	-62.7036					-63.0545	-59.6195
	-61.8515	-60.4477					-64.1052	-62.4886					-62.9268	-62.7011					-63.0545	-59.6125
	-61.8487	-60.4463					-64.1038	-62.4882					-62.925	-62.6992					-63.0548	-59.6046
	-61.8458	-60.445					-64.1025	-62.4877					-62.9229	-62.698					-63.0555	-59.5962
	-61.8427	-60.4438					-64.1013	-62.4872					-62.9206	-62.6974					-63.0568	-59.5879
	-61.8396	-60.4428					-64.1002	-62.4868					-62.9181	-62.6976					-63.0587	-59.5799
	-61.8364	-60.442					-64.0993	-62.4865					-62.9156	-62.6983					-63.0613	-59.5728
	-61.8333	-60.4416					-64.0985	-62.4865					-62.9132	-62.6997					-63.0645	-59.5669
	-61.8301	-60.4414					-64.0979	-62.4867					-62.9108	-62.7017					-63.068	-59.5622
	-61.8271	-60.4416					-64.0976	-62.4871					-62.9086	-62.7041					-63.0717	-59.5586
	-61.8242	-60.442					-64.0974	-62.4877					-62.9065	-62.707					-63.0751	-59.5558
	-61.8215	-60.4427					-64.0974	-62.4885					-62.9045	-62.7102					-63.078	-59.5533
	-61.8192	-60.4436					-64.0975	-62.4894					-62.9026	-62.7136					-63.0801	-59.5506
	-61.8172	-60.4446					-64.0976	-62.4903					-62.9007	-62.717					-63.0809	-59.5472
	-61.8157	-60.4457					-64.0977	-62.4912					-62.8988	-62.7204					-63.0802	-59.5428
	-61.8146	-60.4469					-64.0976	-62.492					-62.8967	-62.7235					-63.0779	-59.5373
	-61.814	-60.448					-64.0972	-62.4928					-62.8944	-62.7261					-63.0739	-59.5307
	-61.814	-60.4491					-64.0965	-62.4935					-62.8919	-62.7282					-63.068	-59.5235
	-61.8144	-60.4501					-64.0955	-62.4942					-62.8892	-62.7295					-63.0605	-59.5162
	-61.8153	-60.451					-64.0939	-62.4949					-62.8862	-62.73					-63.0515	-59.5092
	-61.8165	-60.452					-64.0919	-62.4957					-62.8831	-62.7295					-63.0414	-59.5032
	-61.818	-60.4529					-64.0893	-62.4967					-62.8798	-62.7281					-63.0306	-59.4984
	-61.8196	-60.4538					-64.0863	-62.4979					-62.8764	-62.7257					-63.0197	-59.4952
	-61.8212	-60.4548					-64.0828	-62.4993					-62.8729	-62.7225					-63.009	-59.4935
	-61.8226	-60.4559					-64.0789	-62.5009					-62.8696	-62.7184					-62.999	-59.4933
	-61.8238	-60.4572					-64.0745	-62.5028					-62.8665	-62.7137					-62.9902	-59.4943
	-61.8246	-60.4587					-64.0699	-62.505					-62.8636	-62.7084					-62.9827	-59.4961
	-61.825	-60.4603					-64.065	-62.5073					-62.861	-62.7028					-62.9767	-59.4985
	-61.8248	-60.4621					-64.06	-62.5099					-62.8589	-62.697					-62.9722	-59.5011
	-61.8241	-60.4641					-64.055	-62.5126					-62.8573	-62.6912					-62.9691	-59.5037
	-61.8228	-60.4661					-64.05	-62.5155					-62.8562	-62.6855					-62.9673	-59.5062
	-61.821	-60.4681					-64.0453	-62.5184					-62.8557	-62.6802					-62.9666	-59.5083
	-61.8187	-60.47					-64.0409	-62.5214					-62.8557	-62.6752					-62.9669	-59.5102
	-61.8161	-60.4717					-64.0369	-62.5245					-62.8562	-62.6707					-62.9682	-59.5117
	-61.8131	-60.4733					-64.0336	-62.5276					-62.8571	-62.6667					-62.9702	-59.5129
	-61.81	-60.4745					-64.0309	-62.5308					-62.8584	-62.6634					-62.9729	-59.5138
	-61.8067	-60.4754					-64.0291	-62.5339					-62.8599	-62.6606					-62.976	-59.5144
	-61.8035	-60.4759					-64.028	-62.537					-62.8615	-62.6583					-62.9792	-59.5145
	-61.8003	-60.4759					-64.0278	-62.5399					-62.8632	-62.6566					-62.9822	-59.5142
	-61.7972	-60.4755					-64.0285	-62.5426					-62.8646	-62.6553					-62.9847	-59.5136
	-61.7944	-60.4746					-64.0298	-62.5451					-62.8658	-62.6544					-62.9864	-59.5126
	-61.7918	-60.4733					-64.0319	-62.5471					-62.8664	-62.6538					-62.9872	-59.5113
	-61.7894	-60.4716					-64.0345	-62.5487					-62.8664	-62.6534					-62.987	-59.51
	-61.7872	-60.4694					-64.0375	-62.5497					-62.8657	-62.6532					-62.9861	-59.5088
	-61.7853	-60.467					-64.0408	-62.5502					-62.8641	-62.6531					-62.9847	-59.508
	-61.7837	-60.4641					-64.0441	-62.55					-62.8615	-62.6529					-62.983	-59.5077
	-61.7822	-60.4611					-64.0474	-62.5492					-62.858	-62.6526					-62.9814	-59.508
	-61.7809	-60.4577					-64.0504	-62.5479					-62.8536	-62.6521					-62.9802	-59.509
	-61.7797	-60.4543					-64.053	-62.5461					-62.8482	-62.6515					-62.9793	-59.5107
	-61.7786	-60.4507					-64.0551	-62.5439					-62.842	-62.6505					-62.9789	-59.5129
	-61.7776	-60.4471					-64.0567	-62.5415					-62.8352	-62.6492					-62.9789	-59.5155
	-61.7767	-60.4435					-64.0575	-62.5389					-62.8277	-62.6475					-62.979	-59.5183
	-61.7757	-60.44					-64.0576	-62.5363					-62.8199	-62.6456					-62.9792	-59.5211
	-61.7748	-60.4366					-64.0568	-62.5338					-62.8118	-62.6433					-62.9792	-59.5237
	-61.7739	-60.4335					-64.0553	-62.5315					-62.8035	-62.6407					-62.9789	-59.5261
	-61.7729	-60.4307					-64.0529	-62.5294					-62.7954	-62.638					-62.9784	-59.5281
	-61.7718	-60.4283					-64.0496	-62.5277					-62.7874	-62.6351					-62.9777	-59.5296
	-61.7707	-60.4262					-64.0457	-62.5263					-62.7796	-62.632					-62.977	-59.5307
	-61.7695	-60.4246					-64.041	-62.5252					-62.7723	-62.629					-62.9764	-59.5311
	-61.7682	-60.4235					-64.0358	-62.5244					-62.7654	-62.6261					-62.9761	-59.5311
	-61.7667	-60.4228					-64.0301	-62.5239					-62.7589	-62.6233					-62.9763	-59.5306
	-61.765	-60.4225					-64.0241	-62.5237					-62.7529	-62.6206					-62.9771	-59.5296
	-61.7632	-60.4227					-64.018	-62.5237					-62.7473	-62.6183					-62.9783	-59.5282
	-61.7613	-60.4232					-64.012	-62.524					-62.7422	-62.6162					-62.9799	-59.5265
	-61.7591	-60.4241					-64.0061	-62.5247					-62.7375	-62.6144					-62.9817	-59.5245
	-61.7569	-60.4252					-64.0007	-62.5256					-62.733	-62.613					-62.9836	-59.5223
	-61.7545	-60.4264					-63.9959	-62.5269					-62.7288	-62.6119					-62.9854	-59.52
	-61.7519	-60.4278					-63.9917	-62.5286					-62.7248	-62.6112					-62.9868	-59.5177
	-61.7493	-60.4292					-63.9882	-62.5306					-62.7209	-62.6108					-62.9879	-59.5154
	-61.7467	-60.4306					-63.9856	-62.533					-62.7171	-62.6109					-62.9886	-59.5134
	-61.7439	-60.4318					-63.9839	-62.5358					-62.7133	-62.6113					-62.9888	-59.5119
	-61.7412	-60.4328					-63.9829	-62.5389					-62.7097	-62.6121					-62.9888	-59.5111
	-61.7385	-60.4337					-63.9827	-62.5423					-62.7061	-62.6133					-62.9886	-59.511
	-61.7359	-60.4343					-63.9833	-62.5459					-62.7027	-62.6148					-62.9883	-59.5119
	-61.7334	-60.4346					-63.9844	-62.5497					-62.6995	-62.6167					-62.9882	-59.5138
	-61.7309	-60.4346					-63.986	-62.5534					-62.6967	-62.6189					-62.9882	-59.5165
	-61.7286	-60.4343					-63.988	-62.5569					-62.6944	-62.6213					-62.9884	-59.5201
	-61.7264	-60.4338					-63.9902	-62.5602					-62.6926	-62.6239					-62.989	-59.5241
	-61.7245	-60.4331					-63.9925	-62.5632					-62.6915	-62.6266					-62.9898	-59.5285
	-61.7227	-60.4321					-63.9949	-62.5656					-62.6911	-62.6294					-62.9907	-59.5327
	-61.7212	-60.431					-63.9972	-62.5674					-62.6915	-62.6321					-62.9915	-59.5366
	-61.72	-60.4297					-63.9995	-62.5686					-62.6927	-62.6346					-62.992	-59.5396
	-61.7191	-60.4284					-64.0016	-62.5691					-62.6945	-62.6367					-62.9918	-59.5417
	-61.7185	-60.427					-64.0036	-62.5689					-62.6971	-62.6384					-62.9907	-59.5424
	-61.7183	-60.4257					-64.0053	-62.568					-62.7003	-62.6395					-62.9885	-59.5418
	-61.7184	-60.4245					-64.0069	-62.5666					-62.7041	-62.64					-62.9852	-59.5397
	-61.7188	-60.4235					-64.0084	-62.5649					-62.7083	-62.6397					-62.9809	-59.5362
	-61.7195	-60.4227					-64.0096	-62.5628					-62.7128	-62.6386					-62.9758	-59.5315
	-61.7204	-60.4221					-64.0107	-62.5607					-62.7177	-62.6366					-62.9704	-59.5257
	-61.7216	-60.4218					-64.0117	-62.5586					-62.7228	-62.6338					-62.965	-59.519
	-61.7229	-60.4217					-64.0126	-62.5568					-62.7281	-62.6301					-62.9602	-59.5115
	-61.7243	-60.4219					-64.0134	-62.5554					-62.7334	-62.6256					-62.9562	-59.5034
	-61.7258	-60.4224					-64.0141	-62.5546					-62.7388	-62.6205					-62.9532	-59.4948
	-61.7272	-60.423					-64.0147	-62.5544					-62.7441	-62.6146					-62.9513	-59.4858
	-61.7285	-60.4238					-64.0152	-62.555					-62.7493	-62.6083					-62.9504	-59.4767
	-61.7296	-60.4246					-64.0156	-62.5563					-62.7543	-62.6015					-62.9502	-59.4676
	-61.7306	-60.4255					-64.0159	-62.5584					-62.759	-62.5943					-62.9505	-59.4588
	-61.7314	-60.4263					-64.0162	-62.5612					-62.7633	-62.587					-62.9511	-59.4507
	-61.7321	-60.427					-64.0164	-62.5646					-62.7669	-62.5796					-62.9517	-59.4438
	-61.7325	-60.4275					-64.0166	-62.5685					-62.7699	-62.5723					-62.9521	-59.4382
	-61.7328	-60.4279					-64.0168	-62.5729					-62.7722	-62.5652					-62.9524	-59.4343
	-61.7329	-60.4282					-64.0171	-62.5775					-62.7735	-62.5583					-62.9525	-59.4323
	-61.733	-60.4283					-64.0175	-62.5823					-62.774	-62.5518					-62.9526	-59.4322
	-61.733	-60.4282					-64.0181	-62.5872					-62.7735	-62.5458					-62.9527	-59.4339
	-61.7331	-60.4281					-64.0189	-62.592					-62.7721	-62.5403					-62.9529	-59.4372
	-61.7331	-60.428					-64.02	-62.5967					-62.7699	-62.5354					-62.9535	-59.4419
	-61.7333	-60.4278					-64.0214	-62.6012					-62.7669	-62.5311					-62.9546	-59.4474
	-61.7336	-60.4278					-64.023	-62.6053					-62.7633	-62.5275					-62.9561	-59.4535
	-61.734	-60.4278					-64.0248	-62.6092					-62.7592	-62.5245					-62.9582	-59.4595
	-61.7345	-60.4279					-64.0268	-62.6127					-62.7548	-62.5221					-62.9607	-59.4652
	-61.7351	-60.4281					-64.0288	-62.6159					-62.7502	-62.5204					-62.9634	-59.4701
	-61.7358	-60.4284					-64.0308	-62.6187					-62.7456	-62.5192					-62.966	-59.474
	-61.7366	-60.4287					-64.0325	-62.6212					-62.7412	-62.5185					-62.9682	-59.4766
	-61.7372	-60.429					-64.034	-62.6233					-62.7371	-62.5184					-62.9697	-59.4779
	-61.7378	-60.4292					-64.035	-62.6252					-62.7335	-62.5186					-62.9701	-59.4779
	-61.7382	-60.4293					-64.0356	-62.6268					-62.7304	-62.5192					-62.9694	-59.477
	-61.7382	-60.4291					-64.0356	-62.6281					-62.728	-62.52					-62.9675	-59.4753
	-61.7378	-60.4285					-64.035	-62.6292					-62.7262	-62.521					-62.9644	-59.4732
	-61.737	-60.4275					-64.0339	-62.63					-62.7251	-62.5222					-62.9606	-59.4711
	-61.7356	-60.426					-64.0322	-62.6307					-62.7247	-62.5234					-62.9563	-59.4692
	-61.7336	-60.424					-64.03	-62.6311					-62.7249	-62.5245					-62.952	-59.4678
	-61.7311	-60.4215					-64.0275	-62.6314					-62.7256	-62.5256					-62.9479	-59.4669
	-61.728	-60.4185					-64.0247	-62.6315					-62.7268	-62.5265					-62.9442	-59.4665
	-61.7244	-60.4151					-64.0217	-62.6315					-62.7283	-62.5272					-62.941	-59.4665
	-61.7204	-60.4112					-64.0185	-62.6314					-62.73	-62.5277					-62.9383	-59.4665
	-61.7161	-60.407					-64.0153	-62.6313					-62.7317	-62.5281					-62.9358	-59.4663
	-61.7117	-60.4026					-64.0121	-62.6312					-62.7333	-62.5282					-62.9332	-59.4657
	-61.7073	-60.3981					-64.0089	-62.6311					-62.7346	-62.5282					-62.93	-59.4643
	-61.703	-60.3937					-64.0057	-62.6313					-62.7355	-62.5281					-62.9261	-59.4622
	-61.6991	-60.3893					-64.0026	-62.6316					-62.7359	-62.528					-62.9211	-59.4592
	-61.6955	-60.3852					-63.9996	-62.6322					-62.7356	-62.5279					-62.915	-59.4556
	-61.6925	-60.3814					-63.9967	-62.6331					-62.7347	-62.5278					-62.9078	-59.4517
	-61.69	-60.378					-63.994	-62.6343					-62.733	-62.528					-62.8998	-59.4478
	-61.6881	-60.3749					-63.9914	-62.6359					-62.7307	-62.5284					-62.8911	-59.4444
	-61.6868	-60.3724					-63.9889	-62.6379					-62.7276	-62.529					-62.8823	-59.442
	-61.686	-60.3703					-63.9867	-62.6402					-62.724	-62.5299					-62.8737	-59.441
	-61.6857	-60.3687					-63.9847	-62.6428					-62.7199	-62.5311					-62.8657	-59.4415
	-61.6858	-60.3676					-63.983	-62.6457					-62.7155	-62.5327					-62.8586	-59.4438
	-61.6863	-60.3669					-63.9817	-62.6488					-62.7111	-62.5345					-62.8527	-59.4477
	-61.687	-60.3668					-63.9807	-62.652					-62.7066	-62.5365					-62.8481	-59.453
	-61.6879	-60.367					-63.9802	-62.6553					-62.7025	-62.5388					-62.8447	-59.4594
	-61.689	-60.3678					-63.9801	-62.6585					-62.6988	-62.5412					-62.8425	-59.4664
	-61.6903	-60.3689					-63.9806	-62.6616					-62.6957	-62.5437					-62.8413	-59.4734
	-61.6916	-60.3705					-63.9816	-62.6646					-62.6933	-62.5462					-62.8409	-59.4799
	-61.6931	-60.3725					-63.9832	-62.6673					-62.6916	-62.5488					-62.8411	-59.4857
	-61.6946	-60.3749					-63.9853	-62.6697					-62.6908	-62.5513					-62.8418	-59.4902
	-61.6962	-60.3776					-63.988	-62.6717					-62.6908	-62.5538					-62.8429	-59.4935
	-61.6979	-60.3808					-63.9911	-62.6732					-62.6916	-62.5562					-62.8443	-59.4953
	-61.6997	-60.3843					-63.9947	-62.6742					-62.6931	-62.5586					-62.8463	-59.4959
	-61.7015	-60.388					-63.9987	-62.6745					-62.6951	-62.5609					-62.8487	-59.4955
	-61.7034	-60.392					-64.0029	-62.6743					-62.6977	-62.5632					-62.8517	-59.4941
	-61.7052	-60.3961					-64.0074	-62.6734					-62.7006	-62.5654					-62.8553	-59.4923
	-61.707	-60.4003					-64.0119	-62.6719					-62.7037	-62.5676					-62.8596	-59.4901
	-61.7087	-60.4045					-64.0164	-62.6698					-62.7069	-62.5697					-62.8647	-59.4878
	-61.7102	-60.4085					-64.0208	-62.6672					-62.71	-62.5717					-62.8703	-59.4856
	-61.7114	-60.4124					-64.0251	-62.6642					-62.713	-62.5735					-62.8765	-59.4834
	-61.7123	-60.4159					-64.0291	-62.661					-62.7158	-62.5752					-62.8832	-59.4813
	-61.7129	-60.4189					-64.0328	-62.6576					-62.7182	-62.5766					-62.8902	-59.4791
	-61.7131	-60.4216					-64.0361	-62.6543					-62.7203	-62.5776					-62.8975	-59.4769
	-61.713	-60.4236					-64.039	-62.6513					-62.722	-62.5782					-62.9048	-59.4745
	-61.7124	-60.4252					-64.0414	-62.6487					-62.7232	-62.5784					-62.912	-59.4718
	-61.7115	-60.4262					-64.0433	-62.6467					-62.724	-62.578					-62.919	-59.469
	-61.7103	-60.4267					-64.0446	-62.6454					-62.7243	-62.5771					-62.9255	-59.4659
	-61.7089	-60.4267					-64.0453	-62.645					-62.7241	-62.5755					-62.9312	-59.4627
	-61.7073	-60.4262					-64.0453	-62.6455					-62.7234	-62.5733					-62.9359	-59.4594
	-61.7056	-60.4255					-64.0447	-62.6469					-62.7222	-62.5705					-62.9393	-59.4561
	-61.704	-60.4245					-64.0435	-62.6492					-62.7206	-62.5671					-62.941	-59.4527
	-61.7024	-60.4234					-64.0417	-62.6523					-62.7185	-62.5633					-62.941	-59.4493
	-61.701	-60.4222					-64.0393	-62.6561					-62.716	-62.559					-62.939	-59.4459
	-61.6998	-60.4212					-64.0366	-62.6604					-62.7132	-62.5544					-62.9352	-59.4425
	-61.6989	-60.4203					-64.0336	-62.6652					-62.7099	-62.5496					-62.9294	-59.4392
	-61.6982	-60.4197					-64.0305	-62.6702					-62.7065	-62.5447					-62.9221	-59.4359
	-61.6977	-60.4194					-64.0275	-62.6753					-62.7027	-62.5397					-62.9135	-59.4329
	-61.6975	-60.4195					-64.0248	-62.6805					-62.6989	-62.5347					-62.9039	-59.4303
	-61.6975	-60.42					-64.0225	-62.6856					-62.6949	-62.5299					-62.8936	-59.4283
	-61.6978	-60.4209					-64.0209	-62.6906					-62.6908	-62.5251					-62.8831	-59.427
	-61.6983	-60.4221					-64.0199	-62.6953					-62.6867	-62.5206					-62.8728	-59.4266
	-61.699	-60.4237					-64.0197	-62.6998					-62.6827	-62.5161					-62.863	-59.4271
	-61.6999	-60.4255					-64.0203	-62.704					-62.6786	-62.5119					-62.854	-59.4285
	-61.701	-60.4275					-64.0218	-62.7079					-62.6747	-62.5077					-62.8462	-59.4307
	-61.7023	-60.4295					-64.0239	-62.7115					-62.6708	-62.5037					-62.8397	-59.4336
	-61.7038	-60.4314					-64.0267	-62.7146					-62.6669	-62.4999					-62.8346	-59.4369
	-61.7053	-60.4332					-64.0299	-62.7172					-62.6631	-62.4962					-62.831	-59.4405
	-61.707	-60.4347					-64.0335	-62.7193					-62.6593	-62.4928					-62.8289	-59.4441
	-61.7086	-60.4358					-64.0371	-62.7207					-62.6556	-62.4896					-62.828	-59.4476
	-61.7102	-60.4365					-64.0407	-62.7214					-62.6518	-62.4868					-62.8281	-59.4508
	-61.7116	-60.4368					-64.0441	-62.7214					-62.6481	-62.4845					-62.829	-59.4536
	-61.7128	-60.4366					-64.0472	-62.7205					-62.6443	-62.4827					-62.8304	-59.4559
	-61.7137	-60.436					-64.0498	-62.7189					-62.6405	-62.4817					-62.832	-59.4577
	-61.7143	-60.4351					-64.0519	-62.7166					-62.6367	-62.4814					-62.8335	-59.4589
	-61.7144	-60.434					-64.0534	-62.7138					-62.6329	-62.482					-62.8348	-59.4596
	-61.714	-60.4328					-64.0545	-62.7106					-62.629	-62.4835					-62.8356	-59.4598
	-61.7132	-60.4316					-64.055	-62.7073					-62.6251	-62.4859					-62.8361	-59.4595
	-61.7119	-60.4306					-64.0552	-62.7042					-62.6212	-62.4891					-62.8362	-59.4588
	-61.7102	-60.4299					-64.0552	-62.7015					-62.6172	-62.4931					-62.8362	-59.4579
	-61.7082	-60.4296					-64.0549	-62.6994					-62.6133	-62.4977					-62.8361	-59.457
	-61.706	-60.4297					-64.0546	-62.6982					-62.6094	-62.5026					-62.8363	-59.4563
	-61.7037	-60.4305					-64.0544	-62.6981					-62.6055	-62.5078					-62.837	-59.456
	-61.7014	-60.4318					-64.0543	-62.6992					-62.6018	-62.5129					-62.8385	-59.4563
	-61.6993	-60.4336					-64.0544	-62.7015					-62.5982	-62.5177					-62.8407	-59.4573
	-61.6973	-60.4359					-64.0548	-62.7051					-62.5949	-62.522					-62.8439	-59.4591
	-61.6957	-60.4387					-64.0555	-62.7098					-62.5919	-62.5254					-62.8479	-59.4617
	-61.6944	-60.4418					-64.0565	-62.7155					-62.5892	-62.5279					-62.8527	-59.4648
	-61.6936	-60.4452					-64.0579	-62.7219					-62.587	-62.5293					-62.8578	-59.4684
	-61.6933	-60.4487					-64.0595	-62.729					-62.5852	-62.5295					-62.8632	-59.4723
	-61.6935	-60.4522					-64.0613	-62.7363					-62.5839	-62.5286					-62.8685	-59.4762
	-61.6942	-60.4557					-64.0633	-62.7437					-62.583	-62.5265					-62.8735	-59.4801
	-61.6954	-60.4589					-64.0655	-62.7508					-62.5827	-62.5234					-62.8778	-59.484
	-61.697	-60.4619					-64.0676	-62.7576					-62.5828	-62.5194					-62.8814	-59.4877
	-61.699	-60.4646					-64.0698	-62.7637					-62.5833	-62.5147					-62.8841	-59.4912
	-61.7013	-60.4669					-64.0719	-62.7691					-62.5842	-62.5096					-62.8861	-59.4946
	-61.7038	-60.4687					-64.0738	-62.7737					-62.5854	-62.5042					-62.8875	-59.4977
	-61.7063	-60.4702					-64.0755	-62.7774					-62.5869	-62.4988					-62.8884	-59.5003
	-61.7088	-60.4713					-64.0769	-62.7803					-62.5886	-62.4935					-62.889	-59.5023
	-61.7111	-60.4721					-64.0781	-62.7823					-62.5904	-62.4885					-62.8895	-59.5034
	-61.7132	-60.4725					-64.0789	-62.7837					-62.5923	-62.4839					-62.8902	-59.5035
	-61.7149	-60.4728					-64.0795	-62.7845					-62.5941	-62.4798					-62.8912	-59.5024
	-61.7163	-60.4728					-64.0798	-62.7849					-62.5959	-62.4763					-62.8925	-59.5003
	-61.7171	-60.4728					-64.0797	-62.785					-62.5975	-62.4735					-62.8941	-59.4971
	-61.7174	-60.4728					-64.0794	-62.785					-62.5988	-62.4713					-62.8957	-59.4933
	-61.7171	-60.4728					-64.0789	-62.7849					-62.5999	-62.4697					-62.8972	-59.4892
	-61.7162	-60.4728					-64.0783	-62.7849					-62.6005	-62.4687					-62.8983	-59.4852
	-61.7149	-60.473					-64.0775	-62.785					-62.6009	-62.4682					-62.8987	-59.4817
	-61.713	-60.4732					-64.0766	-62.7853					-62.6007	-62.4682					-62.8984	-59.479
	-61.7107	-60.4735					-64.0757	-62.7857					-62.6002	-62.4685					-62.8971	-59.4774
	-61.708	-60.4739					-64.0749	-62.7863					-62.5992	-62.4692					-62.8949	-59.4769
	-61.7051	-60.4743					-64.0741	-62.787					-62.5977	-62.47					-62.8918	-59.4773
	-61.7019	-60.4748					-64.0734	-62.7878					-62.5957	-62.4708					-62.888	-59.4785
	-61.6987	-60.4753					-64.0729	-62.7887					-62.5934	-62.4716					-62.8836	-59.4802
	-61.6955	-60.4758					-64.0724	-62.7897					-62.5907	-62.4721					-62.8789	-59.482
	-61.6923	-60.4762					-64.0721	-62.7906					-62.5876	-62.4723					-62.874	-59.4839
	-61.6894	-60.4766					-64.0719	-62.7916					-62.5844	-62.4719					-62.8691	-59.4855
	-61.6868	-60.4769					-64.0717	-62.7926					-62.581	-62.471					-62.8643	-59.4868
	-61.6845	-60.4771					-64.0716	-62.7936					-62.5776	-62.4695					-62.8599	-59.4878
	-61.6826	-60.4773					-64.0714	-62.7946					-62.5743	-62.4673					-62.8559	-59.4886
	-61.6813	-60.4773					-64.071	-62.7957					-62.5711	-62.4645					-62.8524	-59.4891
	-61.6804	-60.4773					-64.0706	-62.7967					-62.5683	-62.461					-62.8496	-59.4895
	-61.6801	-60.4772					-64.0699	-62.7978					-62.5659	-62.4571					-62.8474	-59.4898
	-61.6804	-60.477					-64.0691	-62.799					-62.5639	-62.4528					-62.8458	-59.4901
	-61.6811	-60.4768					-64.0681	-62.8002					-62.5625	-62.4483					-62.8448	-59.4905
	-61.6824	-60.4765					-64.0669	-62.8014					-62.5617	-62.4437					-62.8443	-59.4909
	-61.6841	-60.4761					-64.0658	-62.8026					-62.5613	-62.4391					-62.8441	-59.4915
	-61.6862	-60.4757					-64.0646	-62.8037					-62.5616	-62.4348					-62.8442	-59.4923
	-61.6885	-60.4753					-64.0637	-62.8047					-62.5623	-62.4307					-62.8443	-59.4935
	-61.691	-60.4749					-64.0629	-62.8055					-62.5634	-62.427					-62.8445	-59.4951
	-61.6935	-60.4746					-64.0626	-62.8061					-62.5648	-62.4237					-62.8447	-59.497
	-61.6959	-60.4743					-64.0627	-62.8063					-62.5665	-62.4207					-62.8448	-59.4995
	-61.6982	-60.4741					-64.0632	-62.8062					-62.5684	-62.4181					-62.8449	-59.5023
	-61.7002	-60.4739					-64.0643	-62.8058					-62.5703	-62.4157					-62.8448	-59.5055
	-61.7018	-60.4739					-64.0658	-62.805					-62.5723	-62.4136					-62.8447	-59.5091
	-61.703	-60.474					-64.0678	-62.8039					-62.5744	-62.4116					-62.8444	-59.513
	-61.7038	-60.4742					-64.0701	-62.8026					-62.5765	-62.4097					-62.8438	-59.5172
	-61.7043	-60.4745					-64.0725	-62.8011					-62.5787	-62.4077					-62.8429	-59.5214
	-61.7043	-60.475					-64.0749	-62.7995					-62.581	-62.4057					-62.8417	-59.5256
	-61.7039	-60.4756					-64.0772	-62.798					-62.5834	-62.4035					-62.8401	-59.5296
	-61.7034	-60.4763					-64.0791	-62.7965					-62.586	-62.4013					-62.8382	-59.5331
	-61.7026	-60.4771					-64.0807	-62.7953					-62.5889	-62.3989					-62.8358	-59.536
	-61.7017	-60.4781					-64.0817	-62.7942					-62.5919	-62.3965					-62.8332	-59.538
	-61.7007	-60.4791					-64.0822	-62.7935					-62.5951	-62.394					-62.8303	-59.5388
	-61.6998	-60.4802					-64.0821	-62.793					-62.5985	-62.3915					-62.8273	-59.5382
	-61.699	-60.4813					-64.0815	-62.7927					-62.6019	-62.3891					-62.8242	-59.5362
	-61.6984	-60.4824					-64.0805	-62.7928					-62.6053	-62.3868					-62.8214	-59.5326
	-61.6979	-60.4834					-64.0792	-62.793					-62.6086	-62.3847					-62.8188	-59.5277
	-61.6976	-60.4843					-64.0778	-62.7936					-62.6117	-62.3829					-62.8169	-59.5215
	-61.6975	-60.485					-64.0765	-62.7943					-62.6144	-62.3813					-62.8158	-59.5143
	-61.6975	-60.4856					-64.0753	-62.7953					-62.6167	-62.3801					-62.8155	-59.5067
	-61.6977	-60.4861					-64.0744	-62.7965					-62.6185	-62.3792					-62.8164	-59.4988
	-61.6979	-60.4864					-64.074	-62.798					-62.6198	-62.3788					-62.8183	-59.4913
	-61.6982	-60.4866					-64.0741	-62.7999					-62.6206	-62.3787					-62.8212	-59.4845
	-61.6986	-60.4867					-64.0747	-62.8022					-62.6208	-62.379					-62.8249	-59.4785
	-61.6989	-60.4867					-64.0758	-62.8049					-62.6205	-62.3797					-62.8291	-59.4737
	-61.6992	-60.4866					-64.0774	-62.8081					-62.6198	-62.3807					-62.8336	-59.4701
	-61.6994	-60.4866					-64.0793	-62.8118					-62.6188	-62.382					-62.8379	-59.4677
	-61.6996	-60.4867					-64.0816	-62.8159					-62.6173	-62.3836					-62.8418	-59.4663
	-61.6997	-60.4868					-64.0842	-62.8204					-62.6156	-62.3856					-62.845	-59.4657
	-61.6998	-60.4869					-64.0868	-62.8252					-62.6137	-62.3878					-62.8473	-59.4657
	-61.6999	-60.4872					-64.0895	-62.8303					-62.6117	-62.3903					-62.8487	-59.466
	-61.7	-60.4875					-64.0921	-62.8356					-62.6095	-62.3932					-62.8493	-59.4664
	-61.7001	-60.4879					-64.0947	-62.8409					-62.6073	-62.3964					-62.8492	-59.4667
	-61.7002	-60.4883					-64.0972	-62.8462					-62.6051	-62.4					-62.8487	-59.4666
	-61.7003	-60.4889					-64.0997	-62.8515					-62.603	-62.404					-62.8479	-59.4662
	-61.7005	-60.4895					-64.102	-62.8565					-62.601	-62.4083					-62.847	-59.4655
	-61.7007	-60.4901					-64.1044	-62.8613					-62.5992	-62.413					-62.8461	-59.4644
	-61.701	-60.4908					-64.1067	-62.8659					-62.5976	-62.418					-62.8449	-59.4633
	-61.7013	-60.4915					-64.1091	-62.8702					-62.5964	-62.4233					-62.8435	-59.4623
	-61.7017	-60.4922					-64.1116	-62.8741					-62.5956	-62.4286					-62.8415	-59.4618
	-61.7022	-60.493					-64.1141	-62.8777					-62.5953	-62.434					-62.8387	-59.4621
	-61.7026	-60.4937					-64.1166	-62.881					-62.5954	-62.4391					-62.835	-59.4633
	-61.7031	-60.4943					-64.1191	-62.8839					-62.596	-62.444					-62.8302	-59.4657
	-61.7036	-60.4949					-64.1215	-62.8865					-62.597	-62.4484					-62.8245	-59.4692
	-61.7042	-60.4954					-64.1236	-62.8888					-62.5985	-62.4523					-62.8181	-59.4739
	-61.7047	-60.4958					-64.1255	-62.8908					-62.6003	-62.4555					-62.8114	-59.4792
	-61.7053	-60.4962					-64.127	-62.8925					-62.6023	-62.4579					-62.8048	-59.485
	-61.7058	-60.4964					-64.1281	-62.8939					-62.6044	-62.4596					-62.7987	-59.4907
	-61.7064	-60.4965					-64.1285	-62.8952					-62.6065	-62.4605					-62.7936	-59.4958
	-61.707	-60.4966					-64.1284	-62.8963					-62.6084	-62.4606					-62.7895	-59.4999
	-61.7076	-60.4967					-64.1277	-62.8974					-62.61	-62.4599					-62.7866	-59.5026
	-61.7083	-60.4969					-64.1264	-62.8986					-62.6113	-62.4586					-62.7846	-59.5039
	-61.709	-60.497					-64.1246	-62.8999					-62.612	-62.4567					-62.7832	-59.5037
	-61.7099	-60.4972					-64.1222	-62.9014					-62.6122	-62.4543					-62.7821	-59.5021
	-61.7108	-60.4975					-64.1194	-62.9032					-62.6119	-62.4514					-62.7808	-59.4996
	-61.7119	-60.4978					-64.1163	-62.9054					-62.611	-62.4481					-62.7788	-59.4965
	-61.7132	-60.4981					-64.113	-62.9079					-62.6097	-62.4446					-62.7758	-59.4932
	-61.7146	-60.4985					-64.1095	-62.9107					-62.6079	-62.441					-62.7718	-59.4903
	-61.7163	-60.4989					-64.106	-62.9138					-62.6058	-62.4372					-62.7668	-59.488
	-61.7181	-60.4992					-64.1026	-62.9171					-62.6034	-62.4336					-62.7612	-59.4866
	-61.7201	-60.4996					-64.0993	-62.9205					-62.6009	-62.4301					-62.7553	-59.4863
	-61.7222	-60.4999					-64.0964	-62.9238					-62.5984	-62.4268					-62.7496	-59.4869
	-61.7244	-60.5002					-64.0937	-62.9269					-62.5959	-62.4239					-62.7449	-59.4884
	-61.7267	-60.5005					-64.0915	-62.9296					-62.5935	-62.4215					-62.7414	-59.4904
	-61.729	-60.5008					-64.0898	-62.9319					-62.5911	-62.4195					-62.7395	-59.4929
	-61.7312	-60.5012					-64.0887	-62.9335					-62.5889	-62.4181					-62.7394	-59.4954
	-61.7333	-60.5016					-64.0881	-62.9344					-62.5868	-62.4172					-62.7409	-59.4979
	-61.7352	-60.5021					-64.0881	-62.9346					-62.5848	-62.4167					-62.7437	-59.5
	-61.737	-60.5028					-64.0887	-62.9339					-62.5828	-62.4165					-62.7476	-59.5019
	-61.7385	-60.5036					-64.0899	-62.9326					-62.581	-62.4166					-62.7521	-59.5033
	-61.7397	-60.5046					-64.0917	-62.9306					-62.5792	-62.4168					-62.7568	-59.5046
	-61.7407	-60.5058					-64.0939	-62.9281					-62.5774	-62.4169					-62.7614	-59.5056
	-61.7415	-60.5071					-64.0965	-62.9253					-62.5757	-62.4169					-62.7656	-59.5066
	-61.742	-60.5087					-64.0994	-62.9222					-62.574	-62.4165					-62.7694	-59.5077
	-61.7423	-60.5104					-64.1027	-62.9192					-62.5724	-62.4158					-62.7728	-59.509
	-61.7424	-60.5123					-64.106	-62.9164					-62.5708	-62.4146					-62.7758	-59.5106
	-61.7424	-60.5144					-64.1094	-62.9139					-62.5693	-62.4131					-62.7785	-59.5126
	-61.7423	-60.5166					-64.1128	-62.9119					-62.5679	-62.4112					-62.7811	-59.5149
	-61.7421	-60.519					-64.116	-62.9103					-62.5664	-62.4089					-62.7835	-59.5176
	-61.7419	-60.5214					-64.119	-62.9094					-62.565	-62.4065					-62.7859	-59.5206
	-61.7417	-60.524					-64.1216	-62.909					-62.5635	-62.404					-62.7883	-59.5236
	-61.7414	-60.5265					-64.1239	-62.9091					-62.562	-62.4015					-62.7906	-59.5266
	-61.7412	-60.5291					-64.1257	-62.9097					-62.5605	-62.3991					-62.793	-59.5293
	-61.741	-60.5316					-64.1271	-62.9107					-62.5588	-62.3968					-62.7954	-59.5313
	-61.7408	-60.5341					-64.1278	-62.912					-62.5571	-62.3948					-62.7979	-59.5326
	-61.7407	-60.5365					-64.1281	-62.9135					-62.5553	-62.3929					-62.8004	-59.5328
	-61.7405	-60.5387					-64.1278	-62.9152					-62.5535	-62.3913					-62.803	-59.5319
	-61.7404	-60.5409					-64.127	-62.917					-62.5517	-62.3899					-62.8056	-59.5299
	-61.7402	-60.5429					-64.1257	-62.9187					-62.5499	-62.3887					-62.808	-59.5268
	-61.74	-60.5448					-64.1242	-62.9205					-62.5483	-62.3877					-62.8101	-59.5228
	-61.7398	-60.5467					-64.1225	-62.9221					-62.5469	-62.387					-62.8115	-59.5184
	-61.7396	-60.5485					-64.1207	-62.9237					-62.5458	-62.3866					-62.8121	-59.5138
	-61.7394	-60.5503					-64.119	-62.9251					-62.545	-62.3865					-62.8117	-59.5094
	-61.7391	-60.5521					-64.1177	-62.9264					-62.5446	-62.3868					-62.8101	-59.5057
	-61.7387	-60.554					-64.1169	-62.9275					-62.5445	-62.3875					-62.8071	-59.5031
	-61.7383	-60.556					-64.1167	-62.9284					-62.5449	-62.3887					-62.8027	-59.5017
	-61.7378	-60.5581					-64.1173	-62.9291					-62.5456	-62.3903					-62.797	-59.5019
	-61.7371	-60.5604					-64.1188	-62.9295					-62.5466	-62.3923					-62.7901	-59.5036
	-61.7364	-60.5628					-64.1213	-62.9297					-62.548	-62.3947					-62.7824	-59.5068
	-61.7355	-60.5652					-64.1246	-62.9296					-62.5496	-62.3974					-62.7741	-59.5115
	-61.7345	-60.5678					-64.1289	-62.9293					-62.5514	-62.4002					-62.7658	-59.5174
	-61.7334	-60.5703					-64.1338	-62.9288					-62.5534	-62.4029					-62.7579	-59.5242
	-61.7323	-60.5729					-64.1394	-62.9281					-62.5556	-62.4056					-62.7506	-59.5316
	-61.7311	-60.5753					-64.1454	-62.9273					-62.5579	-62.4079					-62.7445	-59.5392
	-61.73	-60.5777					-64.1516	-62.9264					-62.5604	-62.4098					-62.7396	-59.5466
	-61.7289	-60.58					-64.1578	-62.9256					-62.563	-62.4112					-62.7361	-59.5536
	-61.7279	-60.5821					-64.1638	-62.9249					-62.5658	-62.4121					-62.734	-59.5596
	-61.727	-60.5841					-64.1695	-62.9243					-62.5688	-62.4125					-62.7331	-59.5645
	-61.7263	-60.586					-64.1747	-62.9238					-62.572	-62.4125					-62.7333	-59.568
	-61.7258	-60.5878					-64.1795	-62.9236					-62.5753	-62.4121					-62.7343	-59.5701
	-61.7256	-60.5896					-64.1837	-62.9236					-62.5788	-62.4116					-62.7359	-59.5707
	-61.7255	-60.5914					-64.1874	-62.9238					-62.5824	-62.4111					-62.7379	-59.5701
	-61.7256	-60.5933					-64.1908	-62.9242					-62.586	-62.4109					-62.74	-59.5684
	-61.7258	-60.5952					-64.1938	-62.9247					-62.5896	-62.411					-62.7421	-59.566
	-61.7261	-60.5972					-64.1966	-62.9254					-62.5931	-62.4118					-62.744	-59.5633
	-61.7265	-60.5993					-64.1993	-62.9262					-62.5964	-62.4132					-62.7455	-59.5607
	-61.727	-60.6015					-64.2021	-62.9271					-62.5995	-62.4154					-62.7464	-59.5585
	-61.7274	-60.6037					-64.205	-62.928					-62.6022	-62.4184					-62.7465	-59.5569
	-61.7278	-60.606					-64.208	-62.9289					-62.6045	-62.4221					-62.7458	-59.5561
	-61.7281	-60.6082					-64.2113	-62.9297					-62.6064	-62.4263					-62.7442	-59.556
	-61.7285	-60.6104					-64.2149	-62.9305					-62.6078	-62.431					-62.7417	-59.5566
	-61.7288	-60.6124					-64.2185	-62.9312					-62.6089	-62.436					-62.7383	-59.5577
	-61.7291	-60.6143					-64.2223	-62.9318					-62.6097	-62.4409					-62.7345	-59.5591
	-61.7294	-60.6161					-64.2262	-62.9323					-62.6102	-62.4458					-62.7303	-59.5608
	-61.7299	-60.6176					-64.2299	-62.9328					-62.6104	-62.4504					-62.7264	-59.5625
	-61.7305	-60.6189					-64.2335	-62.9333					-62.6106	-62.4547					-62.7231	-59.5643
	-61.7313	-60.62					-64.2368	-62.9338					-62.6108	-62.4584					-62.7208	-59.5662
	-61.7323	-60.6209					-64.2397	-62.9343					-62.6111	-62.4616					-62.7199	-59.5683
	-61.7336	-60.6216					-64.2422	-62.935					-62.6115	-62.4643					-62.7205	-59.5707
	-61.7351	-60.6222					-64.2441	-62.9358					-62.6121	-62.4665					-62.7226	-59.5733
	-61.7369	-60.6226					-64.2456	-62.9368					-62.6129	-62.4683					-62.726	-59.5763
	-61.7389	-60.6231					-64.2465	-62.9381					-62.6139	-62.4698					-62.7303	-59.5795
	-61.7411	-60.6235					-64.2468	-62.9396					-62.615	-62.471					-62.7352	-59.5827
	-61.7435	-60.624					-64.2466	-62.9415					-62.6163	-62.472					-62.7402	-59.5858
	-61.7458	-60.6246					-64.2459	-62.9436					-62.6177	-62.473					-62.7448	-59.5884
	-61.7482	-60.6254					-64.2447	-62.9461					-62.6191	-62.4739					-62.7486	-59.5905
	-61.7504	-60.6265					-64.2431	-62.9488					-62.6206	-62.4749					-62.7516	-59.5919
	-61.7523	-60.6279					-64.2412	-62.9517					-62.6222	-62.476					-62.7535	-59.5927
	-61.754	-60.6296					-64.2389	-62.9548					-62.6237	-62.4772					-62.7544	-59.5928
	-61.7552	-60.6316					-64.2364	-62.9581					-62.6253	-62.4785					-62.7544	-59.5926
	-61.756	-60.6339					-64.2337	-62.9614					-62.6269	-62.4799					-62.7538	-59.5921
	-61.7562	-60.6366					-64.2309	-62.9648					-62.6286	-62.4814					-62.7526	-59.5915
	-61.7558	-60.6395					-64.2279	-62.9681					-62.6303	-62.4831					-62.7514	-59.5909
	-61.7548	-60.6427					-64.2249	-62.9714					-62.6321	-62.4848					-62.7502	-59.5903
	-61.7533	-60.646					-64.2219	-62.9746					-62.6339	-62.4865					-62.7493	-59.5896
	-61.7513	-60.6495					-64.219	-62.9777					-62.6356	-62.4883					-62.7492	-59.5886
	-61.7488	-60.653					-64.2162	-62.9806					-62.6372	-62.49					-62.7498	-59.5873
	-61.746	-60.6566					-64.2134	-62.9834					-62.6386	-62.4916					-62.7514	-59.5855
	-61.743	-60.6602					-64.2109	-62.9859					-62.6397	-62.4932					-62.754	-59.5833
	-61.7399	-60.6638					-64.2085	-62.9882					-62.6406	-62.4945					-62.7576	-59.5807
	-61.7369	-60.6674					-64.2062	-62.9902					-62.641	-62.4957					-62.7621	-59.5778
	-61.734	-60.6709					-64.2042	-62.9921					-62.641	-62.4965					-62.7674	-59.575
	-61.7313	-60.6744					-64.2023	-62.9937					-62.6406	-62.4971					-62.7733	-59.5725
	-61.729	-60.6779					-64.2007	-62.9951					-62.6396	-62.4973					-62.7797	-59.5705
	-61.727	-60.6813					-64.1993	-62.9963					-62.6382	-62.4972					-62.7863	-59.5691
	-61.7254	-60.6846					-64.1982	-62.9975					-62.6364	-62.4967					-62.793	-59.5685
	-61.7243	-60.6878					-64.1973	-62.9986					-62.6342	-62.4959					-62.7996	-59.5687
	-61.7235	-60.6907					-64.1968	-62.9997					-62.6316	-62.4948					-62.8058	-59.5695
	-61.7232	-60.6933					-64.1965	-63.001					-62.6288	-62.4934					-62.8115	-59.5707
	-61.7232	-60.6956					-64.1967	-63.0023					-62.6258	-62.4918					-62.8165	-59.5722
	-61.7235	-60.6976					-64.1973	-63.0039					-62.6226	-62.49					-62.8206	-59.5737
	-61.7242	-60.6992					-64.1983	-63.0057					-62.6192	-62.4883					-62.8237	-59.5749
	-61.725	-60.7003					-64.1998	-63.0078					-62.6158	-62.4866					-62.8257	-59.5756
	-61.7261	-60.7011					-64.2017	-63.01					-62.6124	-62.4851					-62.8267	-59.5757
	-61.7273	-60.7015					-64.204	-63.0124					-62.6088	-62.4837					-62.8267	-59.5752
	-61.7286	-60.7016					-64.2068	-63.015					-62.6053	-62.4827					-62.8259	-59.574
	-61.7299	-60.7015					-64.21	-63.0176					-62.6017	-62.4819					-62.8246	-59.5722
	-61.7312	-60.7012					-64.2136	-63.0202					-62.5981	-62.4816					-62.8227	-59.5698
	-61.7325	-60.7008					-64.2176	-63.0228					-62.5946	-62.4816					-62.8205	-59.5671
	-61.7337	-60.7005					-64.2218	-63.0252					-62.5912	-62.482					-62.818	-59.5641
	-61.735	-60.7001					-64.2263	-63.0275					-62.5879	-62.4828					-62.8153	-59.561
	-61.7362	-60.6999					-64.231	-63.0296					-62.5848	-62.4841					-62.8126	-59.5581
	-61.7374	-60.6998					-64.2359	-63.0314					-62.582	-62.4858					-62.8098	-59.5554
	-61.7387	-60.6998					-64.2408	-63.0329					-62.5795	-62.4879					-62.8072	-59.5533
	-61.7401	-60.7					-64.2458	-63.0341					-62.5774	-62.4905					-62.8048	-59.5518
	-61.7417	-60.7002					-64.2508	-63.0349					-62.5756	-62.4934					-62.8029	-59.5512
	-61.7435	-60.7006					-64.2558	-63.0353					-62.5743	-62.4967					-62.8015	-59.5515
	-61.7457	-60.7009					-64.2606	-63.0353					-62.5735	-62.5003					-62.8008	-59.5528
	-61.7481	-60.7013					-64.2653	-63.0349					-62.5731	-62.5042					-62.8008	-59.555
	-61.7509	-60.7017					-64.2698	-63.034					-62.5733	-62.5083					-62.8014	-59.558
	-61.754	-60.702					-64.2741	-63.0327					-62.5739	-62.5124					-62.8024	-59.5618
	-61.7574	-60.7024					-64.2782	-63.031					-62.575	-62.5166					-62.8037	-59.5659
	-61.761	-60.7027					-64.2821	-63.029					-62.5766	-62.5207					-62.8051	-59.5701
	-61.7647	-60.7032					-64.2858	-63.0266					-62.5785	-62.5247					-62.8065	-59.574
	-61.7683	-60.7037					-64.2893	-63.0241					-62.5809	-62.5285					-62.8077	-59.5774
	-61.7719	-60.7044					-64.2927	-63.0214					-62.5837	-62.5321					-62.8087	-59.5801
	-61.7752	-60.7053					-64.296	-63.0186					-62.5868	-62.5355					-62.8097	-59.5818
	-61.7781	-60.7065					-64.2993	-63.0159					-62.5902	-62.5387					-62.8105	-59.5827
	-61.7806	-60.708					-64.3025	-63.0132					-62.5939	-62.5419					-62.8113	-59.5826
	-61.7825	-60.7098					-64.3058	-63.0107					-62.5978	-62.545					-62.8122	-59.5819
	-61.7839	-60.712					-64.309	-63.0084					-62.6018	-62.5482					-62.8131	-59.5807
	-61.7848	-60.7145					-64.3123	-63.0064					-62.606	-62.5516					-62.814	-59.5793
	-61.7851	-60.7172					-64.3157	-63.0046					-62.6101	-62.5552					-62.8148	-59.5781
	-61.7849	-60.7203					-64.3191	-63.0032					-62.6142	-62.5593					-62.8154	-59.5773
	-61.7844	-60.7236					-64.3225	-63.002					-62.618	-62.5638					-62.8156	-59.5769
	-61.7836	-60.7269					-64.3259	-63.0012					-62.6216	-62.5688					-62.8155	-59.5772
	-61.7826	-60.7304					-64.3292	-63.0006					-62.6249	-62.5743					-62.8148	-59.5781
	-61.7816	-60.7338					-64.3325	-63.0004					-62.6276	-62.5803					-62.8136	-59.5794
	-61.7806	-60.7372					-64.3357	-63.0004					-62.6297	-62.5867					-62.8118	-59.581
	-61.7798	-60.7404					-64.3387	-63.0006					-62.6311	-62.5935					-62.8092	-59.5827
	-61.7792	-60.7435					-64.3417	-63.0011					-62.6318	-62.6005					-62.806	-59.5843
	-61.7789	-60.7464					-64.3444	-63.0017					-62.6317	-62.6076					-62.8021	-59.5857
	-61.7788	-60.7492					-64.347	-63.0025					-62.6307	-62.6147					-62.7975	-59.5867
	-61.779	-60.7518					-64.3495	-63.0034					-62.6288	-62.6217					-62.7925	-59.5875
	-61.7795	-60.7543					-64.3518	-63.0044					-62.6261	-62.6283					-62.7871	-59.5881
	-61.7803	-60.7566					-64.3541	-63.0055					-62.6225	-62.6346					-62.7818	-59.5887
	-61.7812	-60.759					-64.3563	-63.0068					-62.6182	-62.6404					-62.777	-59.5896
	-61.7824	-60.7613					-64.3585	-63.0083					-62.6131	-62.6455					-62.773	-59.591
	-61.7836	-60.7636					-64.3607	-63.01					-62.6076	-62.6501					-62.7703	-59.5928
	-61.785	-60.766					-64.3629	-63.0122					-62.6016	-62.6541					-62.7692	-59.5953
	-61.7864	-60.7684					-64.3651	-63.0148					-62.5954	-62.6575					-62.7699	-59.5983
	-61.7879	-60.7708					-64.3674	-63.0179					-62.5892	-62.6602					-62.7723	-59.6018
	-61.7894	-60.7732					-64.3698	-63.0216					-62.5831	-62.6625					-62.7763	-59.6056
	-61.7909	-60.7756					-64.3721	-63.0259					-62.5775	-62.6642					-62.7816	-59.6095
	-61.7925	-60.7779					-64.3744	-63.0308					-62.5724	-62.6655					-62.7878	-59.6134
	-61.794	-60.78					-64.3766	-63.0362					-62.5682	-62.6664					-62.7946	-59.6171
	-61.7956	-60.782					-64.3786	-63.042					-62.5648	-62.667					-62.8014	-59.6208
	-61.7971	-60.7838					-64.3806	-63.0482					-62.5626	-62.6672					-62.8079	-59.6242
	-61.7986	-60.7852					-64.3823	-63.0544					-62.5616	-62.667					-62.8136	-59.6273
	-61.7999	-60.7864					-64.3839	-63.0607					-62.5617	-62.6666					-62.8184	-59.6303
	-61.8012	-60.7873					-64.3853	-63.0667					-62.5631	-62.6659					-62.8219	-59.6328
	-61.8023	-60.7879					-64.3866	-63.0724					-62.5656	-62.6649					-62.8241	-59.635
	-61.8032	-60.7882					-64.3878	-63.0776					-62.569	-62.6636					-62.825	-59.6365
	-61.8039	-60.7884					-64.3889	-63.0822					-62.5733	-62.6622					-62.8247	-59.6374
	-61.8043	-60.7884					-64.3899	-63.0862					-62.5782	-62.6605					-62.8236	-59.6375
	-61.8046	-60.7883					-64.3909	-63.0895					-62.5836	-62.6588					-62.8218	-59.6367
	-61.8047	-60.7882					-64.3919	-63.0922					-62.5891	-62.6569					-62.8198	-59.6352
	-61.8046	-60.7883					-64.3928	-63.0942					-62.5945	-62.6551					-62.8179	-59.6332
	-61.8044	-60.7885					-64.3936	-63.0957					-62.5997	-62.6532					-62.8162	-59.6308
	-61.8041	-60.7891					-64.3944	-63.0968					-62.6044	-62.6514					-62.8151	-59.6284
	-61.8038	-60.79					-64.395	-63.0976					-62.6085	-62.6497					-62.8143	-59.6263
	-61.8036	-60.7913					-64.3954	-63.0981					-62.6118	-62.6481					-62.8139	-59.6247
	-61.8033	-60.793					-64.3956	-63.0986					-62.6142	-62.6465					-62.8135	-59.6239
	-61.8032	-60.7951					-64.3955	-63.099					-62.6158	-62.645					-62.8131	-59.6239
	-61.8032	-60.7977					-64.3952	-63.0996					-62.6165	-62.6436					-62.8123	-59.6249
	-61.8033	-60.8006					-64.3946	-63.1005					-62.6165	-62.6422					-62.8109	-59.6267
	-61.8036	-60.8037					-64.3938	-63.1016					-62.6158	-62.6407					-62.8088	-59.6293
	-61.8041	-60.8072					-64.3928	-63.1031					-62.6146	-62.6391					-62.8061	-59.6326
	-61.8047	-60.8107					-64.3918	-63.1049					-62.6131	-62.6375					-62.8026	-59.6365
	-61.8055	-60.8144					-64.3908	-63.1071					-62.6114	-62.6356					-62.7986	-59.6408
	-61.8065	-60.818					-64.39	-63.1097					-62.6098	-62.6335					-62.7942	-59.6453
	-61.8077	-60.8216					-64.3895	-63.1127					-62.6084	-62.6311					-62.7895	-59.6501
	-61.8092	-60.825					-64.3894	-63.1159					-62.6074	-62.6285					-62.7849	-59.6549
	-61.8109	-60.8283					-64.3897	-63.1193					-62.6069	-62.6256					-62.7805	-59.6596
	-61.8128	-60.8313					-64.3907	-63.1229					-62.607	-62.6225					-62.7765	-59.664
	-61.815	-60.834					-64.3923	-63.1266					-62.6077	-62.6192					-62.7731	-59.668
	-61.8173	-60.8364					-64.3946	-63.1303					-62.6092	-62.6158					-62.7705	-59.6713
	-61.8199	-60.8385					-64.3976	-63.1341					-62.6113	-62.6122					-62.7686	-59.6737
	-61.8227	-60.8403					-64.4012	-63.138					-62.614	-62.6087					-62.7673	-59.675
	-61.8256	-60.8418					-64.4054	-63.1418					-62.6173	-62.6052					-62.7666	-59.6751
	-61.8285	-60.8429					-64.4101	-63.1457					-62.621	-62.6019					-62.7662	-59.6739
	-61.8315	-60.8438					-64.4152	-63.1497					-62.6251	-62.5987					-62.7659	-59.6714
	-61.8345	-60.8445					-64.4206	-63.1537					-62.6293	-62.5958					-62.7654	-59.6678
	-61.8374	-60.845					-64.4261	-63.158					-62.6336	-62.5931					-62.7647	-59.6634
	-61.8401	-60.8453					-64.4316	-63.1623					-62.6378	-62.5907					-62.7634	-59.6586
	-61.8428	-60.8457					-64.437	-63.1669					-62.6418	-62.5886					-62.7617	-59.6538
	-61.8453	-60.8462					-64.4422	-63.1716					-62.6456	-62.5867					-62.7596	-59.6493
	-61.8476	-60.8468					-64.4471	-63.1764					-62.6489	-62.5849					-62.7571	-59.6457
	-61.8498	-60.8477					-64.4516	-63.1813					-62.6518	-62.5833					-62.7543	-59.6432
	-61.8518	-60.8488					-64.4557	-63.1862					-62.6543	-62.5817					-62.7516	-59.642
	-61.8537	-60.8502					-64.4593	-63.191					-62.6563	-62.5801					-62.749	-59.6422
	-61.8555	-60.852					-64.4623	-63.1955					-62.6579	-62.5784					-62.7467	-59.6437
	-61.8572	-60.854					-64.4648	-63.1997					-62.6592	-62.5765					-62.745	-59.6465
	-61.8589	-60.8563					-64.4668	-63.2036					-62.6601	-62.5745					-62.7441	-59.6505
	-61.8604	-60.8588					-64.4682	-63.207					-62.6607	-62.5723					-62.744	-59.6554
	-61.8619	-60.8614					-64.4691	-63.2099					-62.6612	-62.5699					-62.7448	-59.6612
	-61.8632	-60.864					-64.4694	-63.2123					-62.6615	-62.5672					-62.7465	-59.6676
	-61.8644	-60.8665					-64.4693	-63.2141					-62.6618	-62.5644					-62.749	-59.6745
	-61.8655	-60.8688					-64.4686	-63.2155					-62.6619	-62.5614					-62.752	-59.6816
	-61.8664	-60.871					-64.4675	-63.2164					-62.6621	-62.5583					-62.7553	-59.6889
	-61.867	-60.8728					-64.4659	-63.2169					-62.6622	-62.5552					-62.7585	-59.6962
	-61.8675	-60.8744					-64.4641	-63.2172					-62.6623	-62.5522					-62.7613	-59.7035
	-61.8677	-60.8757					-64.462	-63.2174					-62.6624	-62.5494					-62.7634	-59.7106
	-61.8678	-60.8767					-64.4597	-63.2175					-62.6625	-62.547					-62.7646	-59.7176
	-61.8678	-60.8776					-64.4573	-63.2176					-62.6625	-62.545					-62.765	-59.7244
	-61.8676	-60.8782					-64.4549	-63.218					-62.6626	-62.5436					-62.7645	-59.7309
	-61.8674	-60.8789					-64.4526	-63.2186					-62.6628	-62.5428					-62.7635	-59.737
	-61.8673	-60.8795					-64.4506	-63.2196					-62.663	-62.5427					-62.7621	-59.7425
	-61.8673	-60.8802					-64.4487	-63.2211					-62.6633	-62.5434					-62.7607	-59.7473
	-61.8674	-60.8811					-64.4472	-63.2231					-62.6636	-62.5449					-62.7596	-59.7512
	-61.8678	-60.8822					-64.4461	-63.2256					-62.6641	-62.5472					-62.759	-59.7542
	-61.8684	-60.8835					-64.4453	-63.2287					-62.6647	-62.5503					-62.7591	-59.7564
	-61.8693	-60.885					-64.445	-63.2322					-62.6655	-62.554					-62.7597	-59.7577
	-61.8705	-60.8868					-64.4452	-63.2361					-62.6664	-62.5583					-62.7608	-59.7584
	-61.8719	-60.8887					-64.4457	-63.2404					-62.6674	-62.5631					-62.7622	-59.7586
	-61.8735	-60.8909					-64.4466	-63.245					-62.6686	-62.5682					-62.7638	-59.7584
	-61.8752	-60.8932					-64.448	-63.2496					-62.6698	-62.5736					-62.7654	-59.7581
	-61.877	-60.8958					-64.4496	-63.2543					-62.6712	-62.5791					-62.7669	-59.7577
	-61.8789	-60.8985					-64.4516	-63.2588					-62.6726	-62.5846					-62.7682	-59.7572
	-61.8807	-60.9013					-64.4539	-63.2632					-62.674	-62.59					-62.7693	-59.7568
	-61.8825	-60.9043					-64.4563	-63.2673					-62.6753	-62.5952					-62.7704	-59.7566
	-61.8842	-60.9074					-64.459	-63.271					-62.6767	-62.6002					-62.7715	-59.7565
	-61.8858	-60.9107					-64.4618	-63.2744					-62.6779	-62.6049					-62.7728	-59.7567
	-61.8873	-60.9142					-64.4647	-63.2774					-62.679	-62.6092					-62.7744	-59.7573
	-61.8888	-60.9178					-64.4677	-63.2801					-62.68	-62.6134					-62.7764	-59.7582
	-61.8902	-60.9216					-64.4707	-63.2824					-62.6808	-62.6173					-62.7787	-59.7595
	-61.8916	-60.9255					-64.4738	-63.2844					-62.6815	-62.6211					-62.7813	-59.7612
	-61.8931	-60.9296					-64.4769	-63.2862					-62.6821	-62.6249					-62.7841	-59.763
	-61.8946	-60.9338					-64.4799	-63.2878					-62.6826	-62.6287					-62.7869	-59.7652
	-61.8963	-60.9381					-64.4829	-63.2894					-62.683	-62.6326					-62.7894	-59.7674
	-61.8981	-60.9425					-64.4859	-63.2909					-62.6834	-62.6367					-62.7914	-59.7699
	-61.9001	-60.9468					-64.4889	-63.2924					-62.6837	-62.641					-62.7925	-59.7727
	-61.9023	-60.9512					-64.4918	-63.2941					-62.684	-62.6455					-62.7926	-59.7758
	-61.9046	-60.9555					-64.4946	-63.2958					-62.6844	-62.6503					-62.7916	-59.7794
	-61.9071	-60.9596					-64.4974	-63.2977					-62.6847	-62.6552					-62.7896	-59.7835
	-61.9097	-60.9635					-64.5	-63.2997					-62.6851	-62.6603					-62.7867	-59.7883
	-61.9123	-60.9673					-64.5025	-63.3018					-62.6855	-62.6654					-62.7834	-59.7937
	-61.9151	-60.9708					-64.5048	-63.304					-62.686	-62.6705					-62.7799	-59.7995
	-61.918	-60.974					-64.5069	-63.3063					-62.6866	-62.6755					-62.7766	-59.8057
	-61.9209	-60.9769					-64.5088	-63.3086					-62.6874	-62.6804					-62.7741	-59.812
	-61.924	-60.9796					-64.5104	-63.3109					-62.6883	-62.6852					-62.7724	-59.8182
	-61.9271	-60.982					-64.5117	-63.3131					-62.6893	-62.6898					-62.7718	-59.8239
	-61.9304	-60.9843					-64.5127	-63.3152					-62.6906	-62.6942					-62.7724	-59.8291
	-61.9338	-60.9864					-64.5135	-63.3172					-62.692	-62.6984					-62.7742	-59.8334
	-61.9373	-60.9884					-64.5141	-63.319					-62.6936	-62.7024					-62.7769	-59.8368
	-61.941	-60.9904					-64.5145	-63.3206					-62.6953	-62.7062					-62.7804	-59.8391
	-61.9448	-60.9924					-64.5147	-63.3221					-62.6971	-62.7098					-62.7846	-59.8403
	-61.9487	-60.9944					-64.5149	-63.3234					-62.6989	-62.713					-62.7892	-59.8406
	-61.9527	-60.9964					-64.5152	-63.3246					-62.7007	-62.7159					-62.794	-59.8401
	-61.9567	-60.9984					-64.5157	-63.3257					-62.7025	-62.7182					-62.7987	-59.8391
	-61.9606	-61.0004					-64.5166	-63.3267					-62.7042	-62.7199					-62.8032	-59.838
	-61.9645	-61.0023					-64.5178	-63.3277					-62.7058	-62.7209					-62.8071	-59.8371
	-61.9682	-61.0041					-64.5196	-63.3286					-62.7074	-62.7212					-62.8103	-59.8369
	-61.9717	-61.0056					-64.5221	-63.3296					-62.7089	-62.7205					-62.8129	-59.8377
	-61.975	-61.0068					-64.5252	-63.3307					-62.7103	-62.7191					-62.8147	-59.8399
	-61.9781	-61.0076					-64.5291	-63.3318					-62.7116	-62.7169					-62.816	-59.8436
	-61.9809	-61.008					-64.5336	-63.3331					-62.7129	-62.714					-62.817	-59.8489
	-61.9833	-61.008					-64.5388	-63.3344					-62.7142	-62.7107					-62.8178	-59.8558
	-61.9855	-61.0076					-64.5446	-63.3358					-62.7156	-62.7071					-62.8189	-59.864
	-61.9872	-61.0067					-64.5507	-63.3374					-62.7169	-62.7034					-62.8202	-59.8732
	-61.9887	-61.0055					-64.5572	-63.339					-62.7182	-62.7					-62.8219	-59.8828
	-61.9897	-61.004					-64.5637	-63.3407					-62.7196	-62.6972					-62.824	-59.8924
	-61.9904	-61.0023					-64.5702	-63.3424					-62.7209	-62.6951					-62.8263	-59.9014
	-61.9908	-61.0005					-64.5765	-63.3441					-62.7221	-62.6939					-62.8286	-59.9094
	-61.9908	-60.9987					-64.5825	-63.3458					-62.7233	-62.694					-62.8307	-59.9159
	-61.9906	-60.9969					-64.588	-63.3475					-62.7243	-62.6952					-62.8323	-59.9206
	-61.99	-60.9953					-64.5929	-63.3491					-62.7251	-62.6977					-62.8334	-59.9235
	-61.9892	-60.9939					-64.5973	-63.3508					-62.7257	-62.7015					-62.8338	-59.9246
[truncated: 3,504 more rows]
