# Supplementary material for: Dendritic sodium spikes are required for long-term potentiation at distal synapses on hippocampal pyramidal neurons
Source: eLife. 2015 Aug 6;4:e06414. doi: 10.7554/eLife.06414 (PMC4576155; doi:10.7554/eLife.06414)
Supplement: Figure 5—source data 1. — DOI: http://dx.doi.org/10.7554/eLife.06414.021 [file elife06414s008.xlsx]

## Sheet: Figure 5
Artifacts are truncated in figures	Panel A1	sampling rate 50000Hz			Panel A2	sampling rate 50000Hz				Panel B		TTX	AP5
		20 nM TTX	Control	50 uM AP5		20 nM TTX	Control	50 uM AP5				1.01577	0.364076
		-64.4172	-64.7054	-64.9493		-64.4389	-64.8103	-65.1798				0.82718	0.545336
		-64.4169	-64.7057	-64.9493		-64.4347	-64.806	-65.1769				0.746219	0.503983
		-64.4159	-64.7069	-64.9495		-64.4308	-64.8012	-65.1753				0.790155	0.767948
		-64.4142	-64.7086	-64.9497		-64.4271	-64.796	-65.1749				0.716932
		-64.4119	-64.7108	-64.9501		-64.4237	-64.7905	-65.1757				0.981403
		-64.4091	-64.7133	-64.9507		-64.4207	-64.7847	-65.1775				0.829114
		-64.4058	-64.7159	-64.9516		-64.4182	-64.7787	-65.1804				1.02458
		-64.4021	-64.7183	-64.9527		-64.416	-64.7728	-65.1843				0.884079
		-64.3982	-64.7203	-64.9543		-64.4143	-64.7669	-65.1891
		-64.3942	-64.7218	-64.9564		-64.413	-64.7613	-65.1948			Mean	0.86838	0.545336
		-64.3901	-64.7228	-64.959		-64.4122	-64.7561	-65.2012			SEM	0.0384344	0.0837264
		-64.3862	-64.7231	-64.9623		-64.4118	-64.7514	-65.2083
		-64.3826	-64.7228	-64.9661		-64.4118	-64.7474	-65.2158
		-64.3795	-64.722	-64.9706		-64.4124	-64.7441	-65.2234
		-64.377	-64.7206	-64.9756		-64.4132	-64.7418	-65.231
		-64.3752	-64.7189	-64.9808		-64.4144	-64.7404	-65.2384
		-64.3743	-64.7169	-64.986		-64.4158	-64.74	-65.2453
		-64.3743	-64.7149	-64.9909		-64.4174	-64.7408	-65.2515
		-64.3752	-64.7128	-64.9951		-64.4188	-64.7428	-65.2569
		-64.3772	-64.7109	-64.9982		-64.4201	-64.746	-65.2613
		-64.3801	-64.7092	-64.9997		-64.421	-64.7503	-65.2647
		-64.3839	-64.7079	-64.9994		-64.4215	-64.7559	-65.2671
		-64.3884	-64.7071	-64.997		-64.4214	-64.7625	-65.2684
		-64.3934	-64.7069	-64.9925		-64.4207	-64.7701	-65.2686
		-64.3988	-64.7074	-64.9858		-64.4192	-64.7787	-65.2678
		-64.4042	-64.7085	-64.9774		-64.417	-64.788	-65.2659
		-64.4096	-64.7104	-64.9674		-64.4142	-64.7979	-65.2631
		-64.4145	-64.713	-64.9566		-64.4108	-64.8081	-65.2594
		-64.4189	-64.7163	-64.9455		-64.4069	-64.8185	-65.255
		-64.4225	-64.7202	-64.9348		-64.4026	-64.8288	-65.2498
		-64.4254	-64.7245	-64.9252		-64.398	-64.8387	-65.2442
		-64.4273	-64.7293	-64.9173		-64.3934	-64.8481	-65.2384
		-64.4283	-64.7344	-64.9118		-64.3887	-64.8567	-65.2326
		-64.4284	-64.7396	-64.9089		-64.3843	-64.8644	-65.2271
		-64.4277	-64.7448	-64.9091		-64.38	-64.871	-65.2222
		-64.4261	-64.7501	-64.9122		-64.3761	-64.8764	-65.2181
		-64.4239	-64.7552	-64.9183		-64.3725	-64.8806	-65.215
		-64.421	-64.7601	-64.9272		-64.3694	-64.8837	-65.213
		-64.4174	-64.7648	-64.9385		-64.3667	-64.8856	-65.2121
		-64.4132	-64.7693	-64.9518		-64.3644	-64.8865	-65.2122
		-64.4084	-64.7735	-64.9666		-64.3625	-64.8866	-65.2132
		-64.403	-64.7774	-64.9824		-64.3609	-64.8861	-65.2147
		-64.397	-64.7811	-64.9989		-64.3596	-64.8851	-65.2165
		-64.3905	-64.7845	-65.0155		-64.3585	-64.8839	-65.2183
		-64.3837	-64.7876	-65.032		-64.3575	-64.8826	-65.2198
		-64.3766	-64.7904	-65.048		-64.3565	-64.8815	-65.2208
		-64.3695	-64.793	-65.0634		-64.3555	-64.8805	-65.2211
		-64.3627	-64.7952	-65.0779		-64.3542	-64.8798	-65.2207
		-64.3564	-64.7972	-65.0914		-64.3528	-64.8793	-65.2196
		-64.3509	-64.799	-65.1038		-64.351	-64.8791	-65.2181
		-64.3465	-64.8005	-65.1151		-64.3489	-64.8791	-65.2162
		-64.3434	-64.8019	-65.1252		-64.3463	-64.8791	-65.2143
		-64.3419	-64.8032	-65.134		-64.3432	-64.879	-65.2126
		-64.3419	-64.8045	-65.1416		-64.3396	-64.8789	-65.2111
		-64.3436	-64.8058	-65.1478		-64.3356	-64.8785	-65.2102
		-64.3467	-64.8072	-65.1526		-64.3311	-64.8779	-65.2098
		-64.351	-64.8088	-65.1561		-64.3263	-64.877	-65.2099
		-64.3563	-64.8106	-65.1581		-64.3212	-64.876	-65.2105
		-64.3621	-64.8126	-65.1588		-64.316	-64.8749	-65.2112
		-64.3681	-64.815	-65.1583		-64.3108	-64.8739	-65.2121
		-64.3739	-64.8176	-65.1565		-64.3057	-64.873	-65.2127
		-64.3791	-64.8205	-65.1539		-64.3009	-64.8725	-65.213
		-64.3835	-64.8236	-65.1505		-64.2965	-64.8724	-65.2127
		-64.3867	-64.8269	-65.1468		-64.2926	-64.873	-65.2118
		-64.3888	-64.8303	-65.143		-64.2893	-64.8742	-65.2101
		-64.3897	-64.8337	-65.1395		-64.2865	-64.876	-65.2077
		-64.3893	-64.8371	-65.1368		-64.2843	-64.8786	-65.2046
		-64.3878	-64.8405	-65.135		-64.2827	-64.8817	-65.2011
		-64.3853	-64.8436	-65.1344		-64.2816	-64.8852	-65.1972
		-64.3819	-64.8467	-65.135		-64.2809	-64.8889	-65.1932
		-64.3779	-64.8495	-65.137		-64.2806	-64.8925	-65.1892
		-64.3733	-64.852	-65.1401		-64.2808	-64.8958	-65.1853
		-64.3683	-64.8544	-65.144		-64.2814	-64.8984	-65.1815
		-64.363	-64.8564	-65.1483		-64.2823	-64.9002	-65.1778
		-64.3574	-64.8581	-65.1525		-64.2838	-64.9009	-65.1741
		-64.3515	-64.8595	-65.1562		-64.2856	-64.9004	-65.1702
		-64.3455	-64.8605	-65.1588		-64.2879	-64.8986	-65.1658
		-64.3393	-64.8612	-65.16		-64.2908	-64.8954	-65.1607
		-64.3328	-64.8614	-65.1596		-64.2941	-64.8909	-65.1545
		-64.3262	-64.8612	-65.1574		-64.2977	-64.8853	-65.147
		-64.3195	-64.8606	-65.1536		-64.3017	-64.8786	-65.1381
		-64.3127	-64.8595	-65.1485		-64.3059	-64.8712	-65.1275
		-64.3059	-64.8581	-65.1426		-64.3101	-64.8633	-65.1155
		-64.2994	-64.8563	-65.1364		-64.3142	-64.855	-65.102
		-64.2932	-64.8542	-65.1306		-64.318	-64.8465	-65.0873
		-64.2875	-64.8518	-65.1261		-64.3213	-64.8381	-65.0717
		-64.2825	-64.8492	-65.1233		-64.3241	-64.8298	-65.0557
		-64.2784	-64.8466	-65.123		-64.3262	-64.8217	-65.0397
		-64.2754	-64.8439	-65.1256		-64.3276	-64.8138	-65.0242
		-64.2735	-64.8413	-65.1313		-64.3283	-64.806	-65.0097
		-64.2728	-64.8388	-65.14		-64.3281	-64.7984	-64.9968
		-64.2733	-64.8365	-65.1516		-64.3272	-64.7908	-64.986
		-64.275	-64.8344	-65.1656		-64.3255	-64.7832	-64.9777
		-64.2779	-64.8327	-65.1813		-64.3232	-64.7755	-64.9723
		-64.2818	-64.8313	-65.1981		-64.3203	-64.7677	-64.9701
		-64.2866	-64.8303	-65.215		-64.3168	-64.7598	-64.9713
		-64.2922	-64.8296	-65.2312		-64.3127	-64.7518	-64.976
		-64.2983	-64.8291	-65.2458		-64.3081	-64.7437	-64.9842
		-64.3049	-64.8287	-65.258		-64.303	-64.7357	-64.9956
		-64.3117	-64.8284	-65.2673		-64.2975	-64.7277	-65.01
		-64.3186	-64.828	-65.273		-64.2917	-64.72	-65.0267
		-64.3256	-64.8273	-65.2751		-64.2855	-64.7127	-65.0453
		-64.3325	-64.8261	-65.2733		-64.279	-64.7058	-65.065
		-64.3391	-64.8243	-65.2678		-64.2725	-64.6995	-65.085
		-64.3454	-64.8217	-65.2589		-64.2659	-64.694	-65.1045
		-64.3512	-64.8181	-65.2469		-64.2595	-64.6894	-65.1226
		-64.3563	-64.8137	-65.2326		-64.2534	-64.6857	-65.1384
		-64.3608	-64.8082	-65.2165		-64.2477	-64.6829	-65.1512
		-64.3645	-64.8018	-65.1994		-64.2425	-64.6812	-65.1605
		-64.3673	-64.7944	-65.1818		-64.2381	-64.6804	-65.1656
		-64.3691	-64.7864	-65.1644		-64.2345	-64.6805	-65.1663
		-64.37	-64.7777	-65.1478		-64.2318	-64.6814	-65.1626
		-64.3701	-64.7686	-65.1322		-64.23	-64.6827	-65.1545
		-64.3694	-64.7593	-65.1179		-64.2293	-64.6844	-65.1425
		-64.3681	-64.75	-65.105		-64.2295	-64.6862	-65.1271
		-64.3666	-64.7407	-65.0935		-64.2306	-64.6877	-65.1091
		-64.365	-64.7318	-65.0832		-64.2325	-64.6887	-65.0894
		-64.3638	-64.7233	-65.074		-64.2352	-64.689	-65.069
		-64.3631	-64.7154	-65.0656		-64.2386	-64.6884	-65.0489
		-64.3632	-64.7081	-65.0577		-64.2425	-64.6868	-65.0301
		-64.3645	-64.7016	-65.0501		-64.2467	-64.6841	-65.0136
		-64.3669	-64.696	-65.0428		-64.2513	-64.6802	-65.0003
		-64.3707	-64.6913	-65.0357		-64.2559	-64.6754	-64.9909
		-64.3756	-64.6876	-65.0288		-64.2607	-64.6697	-64.9858
		-64.3818	-64.6848	-65.0222		-64.2653	-64.6635	-64.9853
		-64.3889	-64.6831	-65.0163		-64.2699	-64.6568	-64.9895
		-64.3968	-64.6824	-65.0113		-64.2743	-64.65	-64.998
		-64.4051	-64.6826	-65.0076		-64.2785	-64.6434	-65.0104
		-64.4136	-64.6836	-65.0055		-64.2825	-64.6373	-65.0259
		-64.422	-64.6854	-65.0055		-64.2863	-64.6318	-65.0439
		-64.43	-64.6876	-65.0079		-64.2899	-64.6271	-65.0632
		-64.4373	-64.6902	-65.013		-64.2933	-64.6234	-65.0829
		-64.4439	-64.6929	-65.0211		-64.2966	-64.6208	-65.102
		-64.4495	-64.6956	-65.0323		-64.2997	-64.6192	-65.1196
		-64.454	-64.698	-65.0466		-64.3027	-64.6187	-65.135
		-64.4574	-64.6999	-65.0638		-64.3055	-64.6191	-65.1476
		-64.4597	-64.7012	-65.0838		-64.3081	-64.6205	-65.157
		-64.461	-64.7019	-65.106		-64.3105	-64.6228	-65.1632
		-64.4613	-64.7017	-65.1298		-64.3126	-64.6258	-65.1663
		-64.4607	-64.7008	-65.1546		-64.3144	-64.6294	-65.1666
		-64.4594	-64.699	-65.1796		-64.3156	-64.6337	-65.1647
		-64.4575	-64.6964	-65.2041		-64.3162	-64.6384	-65.1611
		-64.4552	-64.6931	-65.2272		-64.3163	-64.6436	-65.1565
		-64.4525	-64.6891	-65.2484		-64.3158	-64.649	-65.1517
		-64.4497	-64.6845	-65.2671		-64.3146	-64.6546	-65.1472
		-64.4467	-64.6794	-65.2828		-64.313	-64.6603	-65.1435
		-64.4436	-64.6739	-65.2955		-64.311	-64.6659	-65.141
		-64.4406	-64.6681	-65.305		-64.3089	-64.6712	-65.14
		-64.4376	-64.6622	-65.3114		-64.3067	-64.6761	-65.1405
		-64.4347	-64.6563	-65.315		-64.3047	-64.6803	-65.1424
		-64.4319	-64.6505	-65.3162		-64.3032	-64.6837	-65.1454
		-64.4294	-64.6451	-65.3153		-64.3022	-64.6861	-65.1493
		-64.4271	-64.64	-65.3129		-64.3019	-64.6874	-65.1537
		-64.4251	-64.6356	-65.3094		-64.3024	-64.6876	-65.1581
		-64.4236	-64.6318	-65.305		-64.3038	-64.6867	-65.1621
		-64.4226	-64.6288	-65.3002		-64.3059	-64.6848	-65.1655
		-64.4223	-64.6265	-65.2952		-64.3087	-64.682	-65.1679
		-64.4227	-64.625	-65.2901		-64.312	-64.6786	-65.1692
		-64.4238	-64.6243	-65.285		-64.3158	-64.6747	-65.1693
		-64.4258	-64.6241	-65.2802		-64.3199	-64.6708	-65.1684
		-64.4286	-64.6245	-65.2755		-64.324	-64.667	-65.1664
		-64.4321	-64.6253	-65.2712		-64.3281	-64.6637	-65.1638
		-64.4362	-64.6264	-65.2674		-64.332	-64.6612	-65.1608
		-64.4409	-64.6277	-65.2642		-64.3356	-64.6597	-65.1578
		-64.4459	-64.6291	-65.2618		-64.3387	-64.6594	-65.1551
		-64.451	-64.6304	-65.2605		-64.3415	-64.6604	-65.1531
		-64.4561	-64.6316	-65.2605		-64.3437	-64.6626	-65.1522
		-64.4609	-64.6326	-65.2621		-64.3453	-64.6662	-65.1525
		-64.4653	-64.6334	-65.2653		-64.3464	-64.6709	-65.1543
		-64.4692	-64.6339	-65.2704		-64.3469	-64.6767	-65.1577
		-64.4725	-64.6342	-65.2771		-64.3469	-64.6834	-65.1625
		-64.4752	-64.6342	-65.2854		-64.3464	-64.6906	-65.1686
		-64.4773	-64.6341	-65.2951		-64.3454	-64.6982	-65.1758
		-64.479	-64.6338	-65.3056		-64.344	-64.7058	-65.1837
		-64.4803	-64.6335	-65.3165		-64.3423	-64.7133	-65.1921
		-64.4814	-64.6331	-65.3273		-64.3404	-64.7203	-65.2005
		-64.4822	-64.6329	-65.3374		-64.3384	-64.7267	-65.2085
		-64.483	-64.6329	-65.3464		-64.3364	-64.7324	-65.2159
		-64.4839	-64.633	-65.3537		-64.3345	-64.7371	-65.2223
		-64.4847	-64.6334	-65.3591		-64.3327	-64.7407	-65.2274
		-64.4855	-64.6341	-65.3624		-64.3312	-64.7433	-65.2312
		-64.4863	-64.635	-65.3635		-64.33	-64.7448	-65.2333
		-64.487	-64.636	-65.3624		-64.3291	-64.7451	-65.2339
		-64.4875	-64.6373	-65.3595		-64.3286	-64.7444	-65.2329
		-64.4878	-64.6387	-65.355		-64.3286	-64.7428	-65.2305
		-64.4877	-64.6402	-65.3494		-64.3291	-64.7404	-65.2266
		-64.4871	-64.6417	-65.343		-64.3301	-64.7373	-65.2216
		-64.4861	-64.6434	-65.3365		-64.3315	-64.7337	-65.2157
		-64.4847	-64.6452	-65.3301		-64.3334	-64.7299	-65.2089
		-64.4827	-64.647	-65.3244		-64.3358	-64.7259	-65.2017
		-64.4802	-64.649	-65.3197		-64.3386	-64.722	-65.1942
		-64.4774	-64.6512	-65.3163		-64.3417	-64.7184	-65.1866
		-64.4741	-64.6535	-65.3143		-64.3451	-64.7151	-65.1792
		-64.4706	-64.6562	-65.3138		-64.3486	-64.7123	-65.172
		-64.467	-64.6593	-65.3149		-64.3522	-64.71	-65.1652
		-64.4633	-64.6629	-65.3173		-64.3558	-64.7082	-65.159
		-64.4597	-64.6671	-65.321		-64.3592	-64.7068	-65.1535
		-64.4564	-64.672	-65.3258		-64.3625	-64.7059	-65.1488
		-64.4535	-64.6777	-65.3313		-64.3656	-64.7053	-65.1449
		-64.4513	-64.6842	-65.3374		-64.3684	-64.705	-65.1421
		-64.4497	-64.6917	-65.3438		-64.371	-64.7048	-65.1402
		-64.4489	-64.7001	-65.3502		-64.3733	-64.7049	-65.1396
		-64.4488	-64.7094	-65.3566		-64.3753	-64.705	-65.1402
		-64.4494	-64.7197	-65.3627		-64.377	-64.7052	-65.142
		-64.4506	-64.7308	-65.3685		-64.3785	-64.7056	-65.1451
		-64.4522	-64.7426	-65.3739		-64.3798	-64.7061	-65.1495
		-64.4538	-64.7551	-65.3786		-64.381	-64.7069	-65.155
		-64.4552	-64.768	-65.3827		-64.3819	-64.7081	-65.1614
		-64.4561	-64.7812	-65.3859		-64.3827	-64.7098	-65.1685
		-64.4563	-64.7945	-65.3882		-64.3833	-64.712	-65.1762
		-64.4555	-64.8076	-65.3892		-64.3838	-64.7148	-65.184
		-64.4534	-64.8205	-65.3889		-64.3842	-64.7183	-65.1917
		-64.4501	-64.8329	-65.387		-64.3844	-64.7224	-65.1988
		-64.4456	-64.8446	-65.3834		-64.3844	-64.7271	-65.2051
		-64.4399	-64.8555	-65.3781		-64.3843	-64.7322	-65.2103
		-64.4333	-64.8654	-65.3711		-64.3837	-64.7376	-65.2138
		-64.4259	-64.8742	-65.3626		-64.3826	-64.7429	-65.2153
		-64.4182	-64.8819	-65.3528		-64.3805	-64.7478	-65.214
		-64.4103	-64.8882	-65.3421		-64.377	-64.7514	-65.209
		-64.4028	-64.8933	-65.331		-64.3713	-64.7531	-65.1988
		-64.3959	-64.897	-65.3199		-64.3625	-64.7515	-65.1813
		-64.3898	-64.8996	-65.3095		-64.3492	-64.7452	-65.1535
		-64.3848	-64.9008	-65.3003		-64.3295	-64.732	-65.1114
		-64.3811	-64.901	-65.2927		-64.3013	-64.7094	-65.0499
		-64.3789	-64.9	-65.287		-64.2618	-64.6743	-64.9626
		-64.378	-64.8981	-65.2835		-64.2081	-64.6231	-64.8419
		-64.3786	-64.8954	-65.2822		-64.1369	-64.552	-64.6796
		-64.3807	-64.8919	-65.2829		-64.0449	-64.457	-64.467
		-64.384	-64.8878	-65.2855		-63.9297	-64.3347	-64.1961
		-64.3886	-64.8833	-65.2895		-63.7895	-64.1824	-63.8608
		-64.3942	-64.8784	-65.2942		-63.6245	-63.9993	-63.458
		-64.4006	-64.8733	-65.2992		-63.4377	-63.7873	-62.9899
		-64.4077	-64.8681	-65.3038		-63.2348	-63.5514	-62.4654
		-64.4152	-64.863	-65.3072		-63.026	-63.3008	-61.9014
		-64.4229	-64.858	-65.3091		-62.8254	-63.0494	-61.3245
		-64.4304	-64.8533	-65.309		-62.6514	-62.8156	-60.7708
		-64.4376	-64.849	-65.3066		-62.5261	-62.6223	-60.2855
		-64.4441	-64.845	-65.3019		-62.4743	-62.4954	-59.9206
		-64.4499	-64.8415	-65.295		-62.5214	-62.4622	-59.7315
		-64.4546	-64.8383	-65.286		-62.6913	-62.5494	-59.7724
		-64.4582	-64.8356	-65.2755		-63.0034	-62.7798	-60.0905
		-64.4605	-64.8332	-65.2638		-63.4704	-63.1696	-60.7202
		-64.4616	-64.8311	-65.2515		-64.0948	-63.7254	-61.6765
		-64.4615	-64.8291	-65.2391		-64.8675	-64.4421	-62.9507
		-64.4603	-64.8271	-65.2271		-65.7662	-65.301	-64.5067
		-64.4581	-64.8251	-65.216		-66.7555	-66.2696	-66.2806
		-64.4551	-64.8229	-65.2059		-67.7884	-67.3029	-68.1825
		-64.4515	-64.8204	-65.1972		-68.8084	-68.3456	-70.1017
		-64.4475	-64.8175	-65.1899		-69.7544	-69.3358	-71.9144
		-64.4432	-64.8141	-65.1841		-70.5644	-70.2101	-73.4932
		-64.4389	-64.8103	-65.1798		-71.1816	-70.9086	-74.7188
		-64.4347	-64.806	-65.1769		-71.559	-71.3804	-75.4901
		-64.4308	-64.8012	-65.1753		-71.6641	-71.5881	-75.7349
		-64.4271	-64.796	-65.1749		-71.4821	-71.5119	-75.4167
		-64.4237	-64.7905	-65.1757		-71.0176	-71.151	-74.5393
		-64.4207	-64.7847	-65.1775		-70.2946	-70.5247	-73.1473
		-64.4182	-64.7787	-65.1804		-69.3546	-69.6703	-71.3227
		-64.416	-64.7728	-65.1843		-68.253	-68.6401	-69.1779
		-64.4143	-64.7669	-65.1891		-67.0546	-67.497	-66.8461
		-64.413	-64.7613	-65.1948		-65.8281	-66.3089	-64.4699
		-64.4122	-64.7561	-65.2012		-64.6405	-65.1432	-62.1892
		-64.4118	-64.7514	-65.2083		-63.5518	-64.0616	-60.1301
		-64.4118	-64.7474	-65.2158		-62.6111	-63.1153	-58.3956
		-64.4124	-64.7441	-65.2234		-61.8536	-62.3424	-57.0586
		-64.4132	-64.7418	-65.231		-61.2988	-61.7656	-56.1589
		-64.4144	-64.7404	-65.2384		-60.9512	-61.3923	-55.7029
		-64.4158	-64.74	-65.2453		-60.8013	-61.2158	-55.6664
		-64.4174	-64.7408	-65.2515		-60.828	-61.2172	-56.0004
		-64.4188	-64.7428	-65.2569		-61.0022	-61.3692	-56.6377
		-64.4201	-64.746	-65.2613		-61.29	-61.6387	-57.5005
		-64.421	-64.7503	-65.2647		-61.6559	-61.9911	-58.5086
		-64.4215	-64.7559	-65.2671		-62.0659	-62.3922	-59.5855
		-64.4214	-64.7625	-65.2684		-62.49	-62.8117	-60.664
		-64.4207	-64.7701	-65.2686		-62.9033	-63.2242	-61.6893
		-64.4192	-64.7787	-65.2678		-63.2869	-63.6103	-62.6211
		-64.417	-64.788	-65.2659		-63.6284	-63.9565	-63.4338
		-64.4142	-64.7979	-65.2631		-63.9207	-64.2555	-64.1147
		-64.4108	-64.8081	-65.2594		-64.1619	-64.5045	-64.6626
		-64.4069	-64.8185	-65.255		-64.3535	-64.7049	-65.0849
		-64.4026	-64.8288	-65.2498		-64.5	-64.8606	-65.3946
		-64.398	-64.8387	-65.2442		-64.6073	-64.9774	-65.6084
		-64.3934	-64.8481	-65.2384		-64.6822	-65.0619	-65.7439
		-64.3887	-64.8567	-65.2326		-64.7312	-65.1205	-65.8185
		-64.3843	-64.8644	-65.2271		-64.7607	-65.1594	-65.8479
		-64.38	-64.871	-65.2222		-64.7759	-65.1838	-65.8455
		-64.3761	-64.8764	-65.2181		-64.7815	-65.1981	-65.8224
		-64.3725	-64.8806	-65.215		-64.781	-65.2057	-65.7868
		-64.3694	-64.8837	-65.213		-64.7769	-65.2091	-65.7452
		-64.3667	-64.8856	-65.2121		-64.7713	-65.2101	-65.7016
		-64.3644	-64.8865	-65.2122		-64.7652	-65.2099	-65.659
		-64.3625	-64.8866	-65.2132		-64.7594	-65.2092	-65.6187
		-64.3609	-64.8861	-65.2147		-64.7543	-65.2082	-65.5817
		-64.3596	-64.8851	-65.2165		-64.7498	-65.2072	-65.5481
		-64.3585	-64.8839	-65.2183		-64.746	-65.2061	-65.5178
		-64.3575	-64.8826	-65.2198		-64.7425	-65.2047	-65.4907
		-64.3565	-64.8815	-65.2208		-64.7392	-65.2031	-65.4663
		-64.3555	-64.8805	-65.2211		-64.7358	-65.2011	-65.4446
		-64.3542	-64.8798	-65.2207		-64.7321	-65.1985	-65.4252
		-64.3528	-64.8793	-65.2196		-64.7282	-65.1954	-65.4082
		-64.351	-64.8791	-65.2181		-64.7239	-65.1918	-65.3933
		-64.3489	-64.8791	-65.2162		-64.7194	-65.1875	-65.3804
		-64.3463	-64.8791	-65.2143		-64.7147	-65.1827	-65.3696
		-64.3432	-64.879	-65.2126		-64.7101	-65.1773	-65.3606
		-64.3396	-64.8789	-65.2111		-64.7057	-65.1715	-65.3533
		-64.3356	-64.8785	-65.2102		-64.7017	-65.1652	-65.3475
		-64.3311	-64.8779	-65.2098		-64.6984	-65.1585	-65.3428
		-64.3263	-64.877	-65.2099		-64.6958	-65.1514	-65.339
		-64.3212	-64.876	-65.2105		-64.6939	-65.144	-65.3359
		-64.316	-64.8749	-65.2112		-64.6928	-65.1363	-65.333
		-64.3108	-64.8739	-65.2121		-64.6924	-65.1284	-65.3303
		-64.3057	-64.873	-65.2127		-64.6926	-65.1204	-65.3274
		-64.3009	-64.8725	-65.213		-64.6931	-65.1124	-65.3241
		-64.2965	-64.8724	-65.2127		-64.6938	-65.1045	-65.3203
		-64.2926	-64.873	-65.2118		-64.6945	-65.0968	-65.316
		-64.2893	-64.8742	-65.2101		-64.6951	-65.0894	-65.3109
		-64.2865	-64.876	-65.2077		-64.6954	-65.0825	-65.3051
		-64.2843	-64.8786	-65.2046		-64.6953	-65.0761	-65.2984
		-64.2827	-64.8817	-65.2011		-64.6949	-65.0702	-65.2911
		-64.2816	-64.8852	-65.1972		-64.694	-65.0649	-65.2829
		-64.2809	-64.8889	-65.1932		-64.6928	-65.06	-65.2741
		-64.2806	-64.8925	-65.1892		-64.6911	-65.0555	-65.2646
		-64.2808	-64.8958	-65.1853		-64.6891	-65.0511	-65.2547
		-64.2814	-64.8984	-65.1815		-64.6868	-65.0465	-65.2445
		-64.2823	-64.9002	-65.1778		-64.6842	-65.0416	-65.2341
		-64.2838	-64.9009	-65.1741		-64.6814	-65.036	-65.2236
		-64.2856	-64.9004	-65.1702		-64.6782	-65.0295	-65.2133
		-64.2879	-64.8986	-65.1658		-64.6747	-65.0219	-65.2034
		-64.2908	-64.8954	-65.1607		-64.6708	-65.0129	-65.1938
		-64.2941	-64.8909	-65.1545		-64.6665	-65.0027	-65.1849
		-64.2977	-64.8853	-65.147		-64.6618	-64.991	-65.1765
		-64.3017	-64.8786	-65.1381		-64.6568	-64.9779	-65.1688
		-64.3059	-64.8712	-65.1275		-64.6512	-64.9638	-65.1617
		-64.3101	-64.8633	-65.1155		-64.6453	-64.9487	-65.1552
		-64.3142	-64.855	-65.102		-64.639	-64.9329	-65.1491
		-64.318	-64.8465	-65.0873		-64.6324	-64.9169	-65.1433
		-64.3213	-64.8381	-65.0717		-64.6255	-64.9009	-65.1379
		-64.3241	-64.8298	-65.0557		-64.6184	-64.8852	-65.1326
		-64.3262	-64.8217	-65.0397		-64.6112	-64.8702	-65.1274
		-64.3276	-64.8138	-65.0242		-64.6039	-64.8561	-65.1223
		-64.3283	-64.806	-65.0097		-64.5966	-64.8431	-65.1174
		-64.3281	-64.7984	-64.9968		-64.5893	-64.8312	-65.1127
		-64.3272	-64.7908	-64.986		-64.5821	-64.8204	-65.1084
		-64.3255	-64.7832	-64.9777		-64.5748	-64.8105	-65.1046
		-64.3232	-64.7755	-64.9723		-64.5676	-64.8016	-65.1013
		-64.3203	-64.7677	-64.9701		-64.5602	-64.7932	-65.0988
		-64.3168	-64.7598	-64.9713		-64.5527	-64.7851	-65.0971
		-64.3127	-64.7518	-64.976		-64.545	-64.777	-65.096
		-64.3081	-64.7437	-64.9842		-64.537	-64.7686	-65.0956
		-64.303	-64.7357	-64.9956		-64.5286	-64.7597	-65.0956
		-64.2975	-64.7277	-65.01		-64.5198	-64.7501	-65.0958
		-64.2917	-64.72	-65.0267		-64.5106	-64.7395	-65.0959
		-64.2855	-64.7127	-65.0453		-64.501	-64.7279	-65.0955
		-64.279	-64.7058	-65.065		-64.491	-64.7154	-65.0945
		-64.2725	-64.6995	-65.085		-64.4806	-64.7018	-65.0924
		-64.2659	-64.694	-65.1045		-64.4699	-64.6874	-65.0893
		-64.2595	-64.6894	-65.1226		-64.4588	-64.6723	-65.0849
		-64.2534	-64.6857	-65.1384		-64.4474	-64.6567	-65.0793
		-64.2477	-64.6829	-65.1512		-64.4358	-64.6407	-65.0724
		-64.2425	-64.6812	-65.1605		-64.4237	-64.6246	-65.0644
		-64.2381	-64.6804	-65.1656		-64.4113	-64.6086	-65.0553
		-64.2345	-64.6805	-65.1663		-64.3984	-64.5928	-65.045
		-64.2318	-64.6814	-65.1626		-64.3849	-64.5774	-65.0337
		-64.23	-64.6827	-65.1545		-64.3707	-64.5624	-65.021
		-64.2293	-64.6844	-65.1425		-64.3557	-64.5479	-65.0068
		-64.2295	-64.6862	-65.1271		-64.3398	-64.5338	-64.9908
		-64.2306	-64.6877	-65.1091		-64.3227	-64.5203	-64.9725
		-64.2325	-64.6887	-65.0894		-64.3045	-64.5071	-64.9516
		-64.2352	-64.689	-65.069		-64.2849	-64.4941	-64.9277
		-64.2386	-64.6884	-65.0489		-64.2639	-64.4813	-64.9007
		-64.2425	-64.6868	-65.0301		-64.2414	-64.4685	-64.8703
		-64.2467	-64.6841	-65.0136		-64.2174	-64.4555	-64.8366
		-64.2513	-64.6802	-65.0003		-64.1921	-64.4422	-64.7998
		-64.2559	-64.6754	-64.9909		-64.1654	-64.4284	-64.7604
		-64.2607	-64.6697	-64.9858		-64.1375	-64.414	-64.7188
		-64.2653	-64.6635	-64.9853		-64.1086	-64.3988	-64.6755
		-64.2699	-64.6568	-64.9895		-64.079	-64.3828	-64.6314
		-64.2743	-64.65	-64.998		-64.0488	-64.3658	-64.587
		-64.2785	-64.6434	-65.0104		-64.0184	-64.3479	-64.5429
		-64.2825	-64.6373	-65.0259		-63.988	-64.329	-64.4996
		-64.2863	-64.6318	-65.0439		-63.9579	-64.3092	-64.4575
		-64.2899	-64.6271	-65.0632		-63.9282	-64.2884	-64.4167
		-64.2933	-64.6234	-65.0829		-63.8991	-64.2666	-64.3774
		-64.2966	-64.6208	-65.102		-63.8706	-64.244	-64.3396
		-64.2997	-64.6192	-65.1196		-63.8427	-64.2204	-64.3032
		-64.3027	-64.6187	-65.135		-63.8153	-64.1959	-64.2681
		-64.3055	-64.6191	-65.1476		-63.7882	-64.1703	-64.2342
		-64.3081	-64.6205	-65.157		-63.761	-64.1435	-64.2015
		-64.3105	-64.6228	-65.1632		-63.7335	-64.1153	-64.17
		-64.3126	-64.6258	-65.1663		-63.7053	-64.0856	-64.1397
		-64.3144	-64.6294	-65.1666		-63.6761	-64.0541	-64.1108
		-64.3156	-64.6337	-65.1647		-63.6454	-64.0205	-64.0834
		-64.3162	-64.6384	-65.1611		-63.6129	-63.9847	-64.0576
		-64.3163	-64.6436	-65.1565		-63.5786	-63.9466	-64.0335
		-64.3158	-64.649	-65.1517		-63.5421	-63.906	-64.0112
		-64.3146	-64.6546	-65.1472		-63.5036	-63.8628	-63.9906
		-64.313	-64.6603	-65.1435		-63.4631	-63.8171	-63.9714
		-64.311	-64.6659	-65.141		-63.4207	-63.7688	-63.9532
		-64.3089	-64.6712	-65.14		-63.3766	-63.7183	-63.9357
		-64.3067	-64.6761	-65.1405		-63.3313	-63.6656	-63.9184
		-64.3047	-64.6803	-65.1424		-63.285	-63.611	-63.9005
		-64.3032	-64.6837	-65.1454		-63.2379	-63.5548	-63.8816
		-64.3022	-64.6861	-65.1493		-63.1906	-63.4973	-63.861
		-64.3019	-64.6874	-65.1537		-63.1432	-63.4389	-63.8382
		-64.3024	-64.6876	-65.1581		-63.0959	-63.3798	-63.8129
		-64.3038	-64.6867	-65.1621		-63.049	-63.3205	-63.7847
		-64.3059	-64.6848	-65.1655		-63.0027	-63.2614	-63.7536
		-64.3087	-64.682	-65.1679		-62.9569	-63.2027	-63.7194
		-64.312	-64.6786	-65.1692		-62.9117	-63.1447	-63.6825
		-64.3158	-64.6747	-65.1693		-62.8671	-63.0876	-63.6432
		-64.3199	-64.6708	-65.1684		-62.8229	-63.0317	-63.6017
		-64.324	-64.667	-65.1664		-62.779	-62.977	-63.5587
		-64.3281	-64.6637	-65.1638		-62.7354	-62.9235	-63.5146
		-64.332	-64.6612	-65.1608		-62.6918	-62.8713	-63.4699
		-64.3356	-64.6597	-65.1578		-62.6481	-62.8201	-63.4251
		-64.3387	-64.6594	-65.1551		-62.604	-62.7698	-63.3805
		-64.3415	-64.6604	-65.1531		-62.5596	-62.7202	-63.3364
		-64.3437	-64.6626	-65.1522		-62.5145	-62.6711	-63.2929
		-64.3453	-64.6662	-65.1525		-62.4688	-62.6222	-63.2501
		-64.3464	-64.6709	-65.1543		-62.4224	-62.5732	-63.2078
		-64.3469	-64.6767	-65.1577		-62.3751	-62.524	-63.1658
		-64.3469	-64.6834	-65.1625		-62.327	-62.4745	-63.1239
		-64.3464	-64.6906	-65.1686		-62.278	-62.4245	-63.0817
		-64.3454	-64.6982	-65.1758		-62.2282	-62.374	-63.0391
		-64.344	-64.7058	-65.1837		-62.1775	-62.3231	-62.9956
		-64.3423	-64.7133	-65.1921		-62.1259	-62.2718	-62.951
		-64.3404	-64.7203	-65.2005		-62.0735	-62.22	-62.905
		-64.3384	-64.7267	-65.2085		-62.0202	-62.1679	-62.8574
		-64.3364	-64.7324	-65.2159		-61.9661	-62.1155	-62.808
		-64.3345	-64.7371	-65.2223		-61.9113	-62.0627	-62.7565
		-64.3327	-64.7407	-65.2274		-61.8556	-62.0096	-62.7028
		-64.3312	-64.7433	-65.2312		-61.7992	-61.9558	-62.6466
		-64.33	-64.7448	-65.2333		-61.7422	-61.9014	-62.588
		-64.3291	-64.7451	-65.2339		-61.6846	-61.8461	-62.5268
		-64.3286	-64.7444	-65.2329		-61.6267	-61.7897	-62.4631
		-64.3286	-64.7428	-65.2305		-61.5684	-61.732	-62.3971
		-64.3291	-64.7404	-65.2266		-61.5101	-61.6729	-62.329
		-64.3301	-64.7373	-65.2216		-61.4518	-61.6124	-62.2592
		-64.3315	-64.7337	-65.2157		-61.3937	-61.5502	-62.1882
		-64.3334	-64.7299	-65.2089		-61.336	-61.4865	-62.1165
		-64.3358	-64.7259	-65.2017		-61.2788	-61.4213	-62.0448
		-64.3386	-64.722	-65.1942		-61.2222	-61.3549	-61.9736
		-64.3417	-64.7184	-65.1866		-61.1664	-61.2875	-61.9036
		-64.3451	-64.7151	-65.1792		-61.1113	-61.2193	-61.8351
		-64.3486	-64.7123	-65.172		-61.057	-61.1506	-61.7686
		-64.3522	-64.71	-65.1652		-61.0036	-61.0818	-61.7043
		-64.3558	-64.7082	-65.159		-60.9509	-61.0131	-61.6423
		-64.3592	-64.7068	-65.1535		-60.899	-60.9449	-61.5826
		-64.3625	-64.7059	-65.1488		-60.8477	-60.8773	-61.5251
		-64.3656	-64.7053	-65.1449		-60.797	-60.8105	-61.4697
		-64.3684	-64.705	-65.1421		-60.7468	-60.7446	-61.416
		-64.371	-64.7048	-65.1402		-60.6971	-60.6796	-61.3637
		-64.3733	-64.7049	-65.1396		-60.6477	-60.6154	-61.3125
		-64.3753	-64.705	-65.1402		-60.5987	-60.5519	-61.2621
		-64.377	-64.7052	-65.142		-60.5499	-60.4889	-61.2122
		-64.3785	-64.7056	-65.1451		-60.5013	-60.4261	-61.1624
		-64.3798	-64.7061	-65.1495		-60.4528	-60.3634	-61.1124
		-64.381	-64.7069	-65.155		-60.4046	-60.3003	-61.0621
		-64.3819	-64.7081	-65.1614		-60.3564	-60.2367	-61.0112
		-64.3827	-64.7098	-65.1685		-60.3084	-60.1723	-60.9596
		-64.3833	-64.712	-65.1762		-60.2604	-60.1069	-60.9073
		-64.3838	-64.7148	-65.184		-60.2125	-60.0405	-60.8542
		-64.3842	-64.7183	-65.1917		-60.1646	-59.9729	-60.8003
		-64.3844	-64.7224	-65.1988		-60.1167	-59.9042	-60.7458
		-64.3844	-64.7271	-65.2051		-60.0688	-59.8344	-60.6908
		-64.3843	-64.7322	-65.2103		-60.0209	-59.7638	-60.6354
		-64.3837	-64.7376	-65.2138		-59.9729	-59.6925	-60.5798
		-64.3826	-64.7429	-65.2153		-59.9249	-59.6206	-60.5243
		-64.3805	-64.7478	-65.214		-59.8769	-59.5485	-60.469
		-64.377	-64.7514	-65.209		-59.8288	-59.4761	-60.4144
		-64.3713	-64.7531	-65.1988		-59.7806	-59.4038	-60.3605
		-64.3625	-64.7515	-65.1813		-59.7325	-59.3316	-60.3076
		-64.3492	-64.7452	-65.1535		-59.6844	-59.2595	-60.2559
		-64.3295	-64.732	-65.1114		-59.6364	-59.1876	-60.2056
		-64.3013	-64.7094	-65.0499		-59.5884	-59.1159	-60.1567
		-64.2618	-64.6743	-64.9626		-59.5405	-59.0443	-60.1092
		-64.2081	-64.6231	-64.8419		-59.4927	-58.9729	-60.0629
		-64.1369	-64.552	-64.6796		-59.445	-58.9015	-60.0176
		-64.0449	-64.457	-64.467		-59.3974	-58.8303	-59.9729
		-63.9297	-64.3347	-64.1961		-59.3499	-58.7593	-59.9282
		-63.7895	-64.1824	-63.8608		-59.3025	-58.6884	-59.883
		-63.6245	-63.9993	-63.458		-59.2551	-58.6178	-59.8367
		-63.4377	-63.7873	-62.9899		-59.2079	-58.5475	-59.7886
		-63.2348	-63.5514	-62.4654		-59.1609	-58.4776	-59.7381
		-63.026	-63.3008	-61.9014		-59.1142	-58.4081	-59.6848
		-62.8254	-63.0494	-61.3245		-59.0678	-58.3393	-59.6284
		-62.6514	-62.8156	-60.7708		-59.022	-58.2712	-59.5688
		-62.5261	-62.6223	-60.2855		-58.9768	-58.2039	-59.506
		-62.4743	-62.4954	-59.9206		-58.9324	-58.1376	-59.4405
		-62.5214	-62.4622	-59.7315		-58.8889	-58.0723	-59.3727
		-62.6913	-62.5494	-59.7724		-58.8465	-58.0081	-59.3032
		-63.0034	-62.7798	-60.0905		-58.8053	-57.9453	-59.233
		-63.4704	-63.1696	-60.7202		-58.7653	-57.8838	-59.1628
		-64.0948	-63.7254	-61.6765		-58.7265	-57.8239	-59.0934
		-64.8675	-64.4421	-62.9507		-58.689	-57.7656	-59.0256
		-65.7662	-65.301	-64.5067		-58.6525	-57.7089	-58.9599
		-66.7555	-66.2696	-66.2806		-58.617	-57.6538	-58.8967
		-67.7884	-67.3029	-68.1825		-58.5824	-57.6003	-58.8363
		-68.8084	-68.3456	-70.1017		-58.5484	-57.5482	-58.7786
		-69.7544	-69.3358	-71.9144		-58.5148	-57.4975	-58.7234
		-70.5644	-70.2101	-73.4932		-58.4816	-57.448	-58.6705
		-71.1816	-70.9086	-74.7188		-58.4486	-57.3995	-58.6193
		-71.559	-71.3804	-75.4901		-58.4156	-57.3518	-58.5694
		-71.6641	-71.5881	-75.7349		-58.3827	-57.3047	-58.5203
		-71.4821	-71.5119	-75.4167		-58.3498	-57.2582	-58.4714
		-71.0176	-71.151	-74.5393		-58.3169	-57.2122	-58.4225
		-70.2946	-70.5247	-73.1473		-58.284	-57.1667	-58.3731
		-69.3546	-69.6703	-71.3227		-58.2511	-57.1216	-58.3232
		-68.253	-68.6401	-69.1779		-58.2183	-57.0771	-58.2726
		-67.0546	-67.497	-66.8461		-58.1856	-57.0333	-58.2214
		-65.8281	-66.3089	-64.4699		-58.153	-56.9903	-58.1697
		-64.6405	-65.1432	-62.1892		-58.1205	-56.9483	-58.1175
		-63.5518	-64.0616	-60.1301		-58.0882	-56.9075	-58.0651
		-62.6111	-63.1153	-58.3956		-58.0562	-56.8678	-58.0127
		-61.8536	-62.3424	-57.0586		-58.0244	-56.8294	-57.9603
		-61.2988	-61.7656	-56.1589		-57.9931	-56.7923	-57.9083
		-60.9512	-61.3923	-55.7029		-57.9623	-56.7565	-57.8567
		-60.8013	-61.2158	-55.6664		-57.9322	-56.7219	-57.8057
		-60.828	-61.2172	-56.0004		-57.903	-56.6884	-57.7553
		-61.0022	-61.3692	-56.6377		-57.8747	-56.6558	-57.7058
		-61.29	-61.6387	-57.5005		-57.8474	-56.6242	-57.6573
		-61.6559	-61.9911	-58.5086		-57.8214	-56.5933	-57.6101
		-62.0659	-62.3922	-59.5855		-57.7966	-56.5632	-57.5644
		-62.49	-62.8117	-60.664		-57.773	-56.5338	-57.5205
		-62.9033	-63.2242	-61.6893		-57.7505	-56.505	-57.4787
		-63.2869	-63.6103	-62.6211		-57.7291	-56.4771	-57.4394
		-63.6284	-63.9565	-63.4338		-57.7086	-56.4499	-57.4029
		-63.9207	-64.2555	-64.1147		-57.6887	-56.4237	-57.3694
		-64.1619	-64.5045	-64.6626		-57.6692	-56.3986	-57.3391
		-64.3535	-64.7049	-65.0849		-57.6501	-56.3746	-57.3121
		-64.5	-64.8606	-65.3946		-57.6309	-56.3518	-57.2883
		-64.6073	-64.9774	-65.6084		-57.6117	-56.3305	-57.2675
		-64.6822	-65.0619	-65.7439		-57.5923	-56.3106	-57.2492
		-64.7312	-65.1205	-65.8185		-57.5727	-56.2923	-57.2331
		-64.7607	-65.1594	-65.8479		-57.5529	-56.2757	-57.2186
		-64.7759	-65.1838	-65.8455		-57.533	-56.2608	-57.205
		-64.7815	-65.1981	-65.8224		-57.5131	-56.2477	-57.1918
		-64.781	-65.2057	-65.7868		-57.4935	-56.2363	-57.1783
		-64.7769	-65.2091	-65.7452		-57.4742	-56.2268	-57.1639
		-64.7713	-65.2101	-65.7016		-57.4553	-56.219	-57.1483
		-64.7652	-65.2099	-65.659		-57.4371	-56.213	-57.131
		-64.7594	-65.2092	-65.6187		-57.4195	-56.2086	-57.1118
		-64.7543	-65.2082	-65.5817		-57.4026	-56.2057	-57.0906
		-64.7498	-65.2072	-65.5481		-57.3865	-56.2042	-57.0674
		-64.746	-65.2061	-65.5178		-57.371	-56.2037	-57.0423
		-64.7425	-65.2047	-65.4907		-57.3561	-56.2042	-57.0155
		-64.7392	-65.2031	-65.4663		-57.3416	-56.2052	-56.9874
		-64.7358	-65.2011	-65.4446		-57.3275	-56.2065	-56.9584
		-64.7321	-65.1985	-65.4252		-57.3136	-56.2078	-56.9288
		-64.7282	-65.1954	-65.4082		-57.2999	-56.2089	-56.8991
		-64.7239	-65.1918	-65.3933		-57.2863	-56.2095	-56.8698
		-64.7194	-65.1875	-65.3804		-57.2728	-56.2094	-56.8412
		-64.7147	-65.1827	-65.3696		-57.2593	-56.2085	-56.8137
		-64.7101	-65.1773	-65.3606		-57.246	-56.2066	-56.7877
		-64.7057	-65.1715	-65.3533		-57.2328	-56.2036	-56.7632
		-64.7017	-65.1652	-65.3475		-57.22	-56.1996	-56.7403
		-64.6984	-65.1585	-65.3428		-57.2075	-56.1945	-56.7191
		-64.6958	-65.1514	-65.339		-57.1955	-56.1884	-56.6993
		-64.6939	-65.144	-65.3359		-57.1841	-56.1814	-56.6807
		-64.6928	-65.1363	-65.333		-57.1732	-56.1735	-56.6631
		-64.6924	-65.1284	-65.3303		-57.163	-56.1649	-56.6461
		-64.6926	-65.1204	-65.3274		-57.1534	-56.1556	-56.6293
		-64.6931	-65.1124	-65.3241		-57.1442	-56.1459	-56.6125
		-64.6938	-65.1045	-65.3203		-57.1355	-56.1358	-56.5955
		-64.6945	-65.0968	-65.316		-57.1271	-56.1255	-56.5781
		-64.6951	-65.0894	-65.3109		-57.1189	-56.1153	-56.5603
		-64.6954	-65.0825	-65.3051		-57.1107	-56.1052	-56.5424
		-64.6953	-65.0761	-65.2984		-57.1024	-56.0957	-56.5245
		-64.6949	-65.0702	-65.2911		-57.0939	-56.0867	-56.507
		-64.694	-65.0649	-65.2829		-57.0852	-56.0786	-56.4902
		-64.6928	-65.06	-65.2741		-57.0762	-56.0717	-56.4747
		-64.6911	-65.0555	-65.2646		-57.067	-56.0659	-56.4608
		-64.6891	-65.0511	-65.2547		-57.0576	-56.0615	-56.4489
		-64.6868	-65.0465	-65.2445		-57.048	-56.0586	-56.4392
		-64.6842	-65.0416	-65.2341		-57.0384	-56.0571	-56.432
		-64.6814	-65.036	-65.2236		-57.029	-56.057	-56.4272
		-64.6782	-65.0295	-65.2133		-57.0198	-56.0582	-56.4248
		-64.6747	-65.0219	-65.2034		-57.011	-56.0604	-56.4243
		-64.6708	-65.0129	-65.1938		-57.0027	-56.0633	-56.4256
		-64.6665	-65.0027	-65.1849		-56.9952	-56.0668	-56.428
		-64.6618	-64.991	-65.1765		-56.9885	-56.0706	-56.4312
		-64.6568	-64.9779	-65.1688		-56.9827	-56.0742	-56.4347
		-64.6512	-64.9638	-65.1617		-56.9779	-56.0776	-56.438
		-64.6453	-64.9487	-65.1552		-56.9741	-56.0805	-56.4407
		-64.639	-64.9329	-65.1491		-56.9713	-56.0828	-56.4427
		-64.6324	-64.9169	-65.1433		-56.9695	-56.0844	-56.4437
		-64.6255	-64.9009	-65.1379		-56.9686	-56.0853	-56.4439
		-64.6184	-64.8852	-65.1326		-56.9686	-56.0855	-56.4435
		-64.6112	-64.8702	-65.1274		-56.9692	-56.085	-56.4429
		-64.6039	-64.8561	-65.1223		-56.9705	-56.084	-56.4426
		-64.5966	-64.8431	-65.1174		-56.9723	-56.0826	-56.4431
		-64.5893	-64.8312	-65.1127		-56.9744	-56.0808	-56.4452
		-64.5821	-64.8204	-65.1084		-56.9767	-56.0789	-56.4496
		-64.5748	-64.8105	-65.1046		-56.9792	-56.0771	-56.457
		-64.5676	-64.8016	-65.1013		-56.9816	-56.0753	-56.4677
		-64.5602	-64.7932	-65.0988		-56.984	-56.0739	-56.4824
		-64.5527	-64.7851	-65.0971		-56.9861	-56.0729	-56.5011
		-64.545	-64.777	-65.096		-56.988	-56.0724	-56.5238
		-64.537	-64.7686	-65.0956		-56.9896	-56.0726	-56.5503
		-64.5286	-64.7597	-65.0956		-56.9909	-56.0735	-56.58
		-64.5198	-64.7501	-65.0958		-56.9919	-56.0752	-56.6122
		-64.5106	-64.7395	-65.0959		-56.9926	-56.0777	-56.6457
		-64.501	-64.7279	-65.0955		-56.9933	-56.0809	-56.6795
		-64.491	-64.7154	-65.0945		-56.9939	-56.0847	-56.7123
		-64.4806	-64.7018	-65.0924		-56.9945	-56.0891	-56.7429
		-64.4699	-64.6874	-65.0893		-56.9954	-56.0939	-56.7702
		-64.4588	-64.6723	-65.0849		-56.9967	-56.099	-56.7931
		-64.4474	-64.6567	-65.0793		-56.9983	-56.1043	-56.8109
		-64.4358	-64.6407	-65.0724		-57.0003	-56.1095	-56.8233
		-64.4237	-64.6246	-65.0644		-57.0027	-56.1146	-56.8299
		-64.4113	-64.6086	-65.0553		-57.0054	-56.1194	-56.8311
		-64.3984	-64.5928	-65.045		-57.0083	-56.124	-56.8273
		-64.3849	-64.5774	-65.0337		-57.0114	-56.1282	-56.8193
		-64.3707	-64.5624	-65.021		-57.0144	-56.132	-56.8081
		-64.3557	-64.5479	-65.0068		-57.0172	-56.1355	-56.7946
		-64.3398	-64.5338	-64.9908		-57.0198	-56.1385	-56.7801
		-64.3227	-64.5203	-64.9725		-57.022	-56.1412	-56.7656
		-64.3045	-64.5071	-64.9516		-57.0238	-56.1434	-56.7523
		-64.2849	-64.4941	-64.9277		-57.0252	-56.1454	-56.7409
		-64.2639	-64.4813	-64.9007		-57.0262	-56.147	-56.7322
		-64.2414	-64.4685	-64.8703		-57.0269	-56.1485	-56.7268
		-64.2174	-64.4555	-64.8366		-57.0272	-56.1498	-56.7249
		-64.1921	-64.4422	-64.7998		-57.0273	-56.151	-56.7268
		-64.1654	-64.4284	-64.7604		-57.0271	-56.1523	-56.7324
		-64.1375	-64.414	-64.7188		-57.0266	-56.1538	-56.7415
		-64.1086	-64.3988	-64.6755		-57.0257	-56.1556	-56.7538
		-64.079	-64.3828	-64.6314		-57.0246	-56.1577	-56.7689
		-64.0488	-64.3658	-64.587		-57.023	-56.1603	-56.7863
		-64.0184	-64.3479	-64.5429		-57.0211	-56.1634	-56.8055
		-63.988	-64.329	-64.4996		-57.0188	-56.167	-56.8257
		-63.9579	-64.3092	-64.4575		-57.0162	-56.171	-56.8464
		-63.9282	-64.2884	-64.4167		-57.0134	-56.1753	-56.867
		-63.8991	-64.2666	-64.3774		-57.0104	-56.1799	-56.8868
		-63.8706	-64.244	-64.3396		-57.0075	-56.1844	-56.9054
		-63.8427	-64.2204	-64.3032		-57.0049	-56.1888	-56.9221
		-63.8153	-64.1959	-64.2681		-57.0025	-56.1928	-56.9369
		-63.7882	-64.1703	-64.2342		-57.0007	-56.1964	-56.9493
		-63.761	-64.1435	-64.2015		-56.9994	-56.1993	-56.9595
		-63.7335	-64.1153	-64.17		-56.9987	-56.2014	-56.9676
		-63.7053	-64.0856	-64.1397		-56.9985	-56.2027	-56.9737
		-63.6761	-64.0541	-64.1108		-56.9987	-56.2031	-56.9783
		-63.6454	-64.0205	-64.0834		-56.9992	-56.2027	-56.982
		-63.6129	-63.9847	-64.0576		-56.9999	-56.2014	-56.9851
		-63.5786	-63.9466	-64.0335		-57.0005	-56.1992	-56.9884
		-63.5421	-63.906	-64.0112		-57.001	-56.1964	-56.9922
		-63.5036	-63.8628	-63.9906		-57.0012	-56.193	-56.9972
		-63.4631	-63.8171	-63.9714		-57.0011	-56.1891	-57.0037
		-63.4207	-63.7688	-63.9532		-57.0007	-56.1848	-57.0119
		-63.3766	-63.7183	-63.9357		-57	-56.1803	-57.0221
		-63.3313	-63.6656	-63.9184		-56.9992	-56.1757	-57.0343
		-63.285	-63.611	-63.9005		-56.9985	-56.1712	-57.0482
		-63.2379	-63.5548	-63.8816		-56.9979	-56.1668	-57.0639
		-63.1906	-63.4973	-63.861		-56.9977	-56.1628	-57.0808
		-63.1432	-63.4389	-63.8382		-56.998	-56.1591	-57.0988
		-63.0959	-63.3798	-63.8129		-56.9988	-56.156	-57.1174
		-63.049	-63.3205	-63.7847		-57.0003	-56.1535	-57.1362
		-63.0027	-63.2614	-63.7536		-57.0023	-56.1517	-57.1549
		-62.9569	-63.2027	-63.7194		-57.0047	-56.1507	-57.1732
		-62.9117	-63.1447	-63.6825		-57.0076	-56.1504	-57.1908
		-62.8671	-63.0876	-63.6432		-57.0107	-56.1509	-57.2076
		-62.8229	-63.0317	-63.6017		-57.014	-56.1523	-57.2236
		-62.779	-62.977	-63.5587		-57.0173	-56.1544	-57.2385
		-62.7354	-62.9235	-63.5146		-57.0205	-56.1573	-57.2526
		-62.6918	-62.8713	-63.4699		-57.0235	-56.161	-57.2658
		-62.6481	-62.8201	-63.4251		-57.0264	-56.1654	-57.2782
		-62.604	-62.7698	-63.3805		-57.0292	-56.1705	-57.2899
		-62.5596	-62.7202	-63.3364		-57.0318	-56.1763	-57.301
		-62.5145	-62.6711	-63.2929		-57.0345	-56.183	-57.3114
		-62.4688	-62.6222	-63.2501		-57.0373	-56.1904	-57.3214
		-62.4224	-62.5732	-63.2078		-57.0401	-56.1987	-57.3309
		-62.3751	-62.524	-63.1658		-57.0431	-56.2079	-57.34
		-62.327	-62.4745	-63.1239		-57.0461	-56.218	-57.3486
		-62.278	-62.4245	-63.0817		-57.0492	-56.229	-57.3569
		-62.2282	-62.374	-63.0391		-57.0522	-56.2409	-57.3649
		-62.1775	-62.3231	-62.9956		-57.055	-56.2535	-57.3726
		-62.1259	-62.2718	-62.951		-57.0575	-56.2669	-57.3799
		-62.0735	-62.22	-62.905		-57.0595	-56.2808	-57.3868
		-62.0202	-62.1679	-62.8574		-57.0609	-56.2952	-57.3934
		-61.9661	-62.1155	-62.808		-57.0616	-56.3097	-57.3995
		-61.9113	-62.0627	-62.7565		-57.0614	-56.3242	-57.4053
		-61.8556	-62.0096	-62.7028		-57.0605	-56.3385	-57.4105
		-61.7992	-61.9558	-62.6466		-57.0588	-56.3526	-57.4153
		-61.7422	-61.9014	-62.588		-57.0563	-56.3661	-57.4196
		-61.6846	-61.8461	-62.5268		-57.0533	-56.3791	-57.4235
		-61.6267	-61.7897	-62.4631		-57.0497	-56.3914	-57.427
		-61.5684	-61.732	-62.3971		-57.0457	-56.4032	-57.4302
		-61.5101	-61.6729	-62.329		-57.0415	-56.4143	-57.4332
		-61.4518	-61.6124	-62.2592		-57.0372	-56.425	-57.4361
		-61.3937	-61.5502	-62.1882		-57.033	-56.4351	-57.439
		-61.336	-61.4865	-62.1165		-57.029	-56.4448	-57.442
		-61.2788	-61.4213	-62.0448		-57.0253	-56.4543	-57.4452
		-61.2222	-61.3549	-61.9736		-57.0223	-56.4634	-57.4485
		-61.1664	-61.2875	-61.9036		-57.0201	-56.4723	-57.4522
		-61.1113	-61.2193	-61.8351		-57.0188	-56.4809	-57.4561
		-61.057	-61.1506	-61.7686		-57.0187	-56.4893	-57.4603
		-61.0036	-61.0818	-61.7043		-57.02	-56.4975	-57.4649
		-60.9509	-61.0131	-61.6423		-57.0227	-56.5054	-57.4699
		-60.899	-60.9449	-61.5826		-57.027	-56.513	-57.4752
		-60.8477	-60.8773	-61.5251		-57.0329	-56.5203	-57.4809
		-60.797	-60.8105	-61.4697		-57.0403	-56.5272	-57.4869
		-60.7468	-60.7446	-61.416		-57.0489	-56.5338	-57.4934
		-60.6971	-60.6796	-61.3637		-57.0587	-56.5402	-57.5
		-60.6477	-60.6154	-61.3125		-57.0693	-56.5462	-57.5069
		-60.5987	-60.5519	-61.2621		-57.0804	-56.552	-57.5138
		-60.5499	-60.4889	-61.2122		-57.0916	-56.5576	-57.5206
		-60.5013	-60.4261	-61.1624		-57.1027	-56.563	-57.5271
		-60.4528	-60.3634	-61.1124		-57.1133	-56.5683	-57.5331
		-60.4046	-60.3003	-61.0621		-57.1232	-56.5734	-57.5384
		-60.3564	-60.2367	-61.0112		-57.1324	-56.5784	-57.5431
		-60.3084	-60.1723	-60.9596		-57.1407	-56.5833	-57.5469
		-60.2604	-60.1069	-60.9073		-57.1481	-56.5881	-57.5498
		-60.2125	-60.0405	-60.8542		-57.1548	-56.5928	-57.552
		-60.1646	-59.9729	-60.8003		-57.1608	-56.5973	-57.5534
		-60.1167	-59.9042	-60.7458		-57.1662	-56.6016	-57.5542
		-60.0688	-59.8344	-60.6908		-57.1712	-56.6057	-57.5544
		-60.0209	-59.7638	-60.6354		-57.1757	-56.6095	-57.554
		-59.9729	-59.6925	-60.5798		-57.1796	-56.6129	-57.5529
		-59.9249	-59.6206	-60.5243		-57.1828	-56.6157	-57.5508
		-59.8769	-59.5485	-60.469		-57.1848	-56.6177	-57.5471
		-59.8288	-59.4761	-60.4144		-57.1851	-56.6183	-57.541
		-59.7806	-59.4038	-60.3605		-57.1827	-56.6169	-57.531
		-59.7325	-59.3316	-60.3076		-57.1764	-56.6124	-57.515
		-59.6844	-59.2595	-60.2559		-57.1648	-56.6036	-57.4902
		-59.6364	-59.1876	-60.2056		-57.1458	-56.5885	-57.4526
		-59.5884	-59.1159	-60.1567		-57.1172	-56.5648	-57.3974
		-59.5405	-59.0443	-60.1092		-57.0763	-56.5296	-57.3183
		-59.4927	-58.9729	-60.0629		-57.0202	-56.4795	-57.2084
		-59.445	-58.9015	-60.0176		-56.946	-56.4108	-57.0595
		-59.3974	-58.8303	-59.9729		-56.8509	-56.32	-56.8635
		-59.3499	-58.7593	-59.9282		-56.7329	-56.2036	-56.6126
		-59.3025	-58.6884	-59.883		-56.5912	-56.0597	-56.3011
		-59.2551	-58.6178	-59.8367		-56.4267	-55.8877	-55.9261
		-59.2079	-58.5475	-59.7886		-56.2431	-55.69	-55.4899
		-59.1609	-58.4776	-59.7381		-56.0471	-55.472	-55.0013
		-59.1142	-58.4081	-59.6848		-55.8495	-55.2437	-54.4772
		-59.0678	-58.3393	-59.6284		-55.6651	-55.0195	-53.944
		-59.022	-58.2712	-59.5688		-55.5129	-54.8187	-53.4378
		-58.9768	-58.2039	-59.506		-55.4154	-54.665	-53.0034
		-58.9324	-58.1376	-59.4405		-55.3976	-54.5851	-52.6927
		-58.8889	-58.0723	-59.3727		-55.4849	-54.6073	-52.5612
		-58.8465	-58.0081	-59.3032		-55.7011	-54.7591	-52.6631
		-58.8053	-57.9453	-59.233		-56.0656	-55.0639	-53.0462
		-58.7653	-57.8838	-59.1628		-56.5905	-55.5385	-53.745
		-58.7265	-57.8239	-59.0934		-57.2778	-56.1895	-54.7753
		-58.689	-57.7656	-59.0256		-58.1176	-57.0114	-56.1287
		-58.6525	-57.7089	-58.9599		-59.0865	-57.9841	-57.7696
		-58.617	-57.6538	-58.8967		-60.1478	-59.0735	-59.6341
		-58.5824	-57.6003	-58.8363		-61.2524	-60.2314	-61.632
		-58.5484	-57.5482	-58.7786		-62.3423	-61.399	-63.6513
		-58.5148	-57.4975	-58.7234		-63.3536	-62.5101	-65.5665
		-58.4816	-57.448	-58.6705		-64.222	-63.4963	-67.2477
		-58.4486	-57.3995	-58.6193		-64.8882	-64.2927	-68.5722
		-58.4156	-57.3518	-58.5694		-65.3029	-64.8437	-69.4353
		-58.3827	-57.3047	-58.5203		-65.4318	-65.108	-69.7609
		-58.3498	-57.2582	-58.4714		-65.2588	-65.0625	-69.5087
		-58.3169	-57.2122	-58.4225		-64.7879	-64.7053	-68.6793
		-58.284	-57.1667	-58.3731		-64.0436	-64.0554	-67.3148
		-58.2511	-57.1216	-58.3232		-63.0684	-63.1518	-65.4958
		-58.2183	-57.0771	-58.2726		-61.9196	-62.0501	-63.3346
		-58.1856	-57.0333	-58.2214		-60.6645	-60.8174	-60.9654
		-58.153	-56.9903	-58.1697		-59.3745	-59.5267	-58.5332
		-58.1205	-56.9483	-58.1175		-58.1195	-58.2509	-56.1808
		-58.0882	-56.9075	-58.0651		-56.9625	-57.057	-54.0383
		-58.0562	-56.8678	-58.0127		-55.9549	-56.001	-52.2124
		-58.0244	-56.8294	-57.9603		-55.1341	-55.1249	-50.7804
		-57.9931	-56.7923	-57.9083		-54.5211	-54.4544	-49.7856
		-57.9623	-56.7565	-57.8567		-54.1213	-53.9984	-49.2378
		-57.9322	-56.7219	-57.8057		-53.9256	-53.7511	-49.1154
		-57.903	-56.6884	-57.7553		-53.913	-53.6933	-49.3713
		-57.8747	-56.6558	-57.7058		-54.054	-53.7969	-49.9394
		-57.8474	-56.6242	-57.6573		-54.314	-54.0273	-50.7429
		-57.8214	-56.5933	-57.6101		-54.6568	-54.3482	-51.7013
		-57.7966	-56.5632	-57.5644		-55.0479	-54.7241	-52.7379
		-57.773	-56.5338	-57.5205		-55.4562	-55.1228	-53.7847
		-57.7505	-56.505	-57.4787		-55.8563	-55.5176	-54.7861
		-57.7291	-56.4771	-57.4394		-56.2289	-55.888	-55.7009
		-57.7086	-56.4499	-57.4029		-56.5609	-56.22	-56.5022
		-57.6887	-56.4237	-57.3694		-56.845	-56.5054	-57.1765
		-57.6692	-56.3986	-57.3391		-57.079	-56.7412	-57.7214
		-57.6501	-56.3746	-57.3121		-57.2645	-56.9285	-58.1433
		-57.6309	-56.3518	-57.2883		-57.4057	-57.0713	-58.4547
		-57.6117	-56.3305	-57.2675		-57.5086	-57.1754	-58.6714
		-57.5923	-56.3106	-57.2492		-57.58	-57.2473	-58.8104
		-57.5727	-56.2923	-57.2331		-57.6266	-57.2938	-58.8885
		-57.5529	-56.2757	-57.2186		-57.6547	-57.321	-58.9209
		-57.533	-56.2608	-57.205		-57.6698	-57.3345	-58.9209
		-57.5131	-56.2477	-57.1918		-57.6763	-57.3389	-58.8991
		-57.4935	-56.2363	-57.1783		-57.6778	-57.3376	-58.8638
		-57.4742	-56.2268	-57.1639		-57.6769	-57.3335	-58.8213
		-57.4553	-56.219	-57.1483		-57.6754	-57.3285	-58.7758
		-57.4371	-56.213	-57.131		-57.6743	-57.3239	-58.7303
		-57.4195	-56.2086	-57.1118		-57.6742	-57.3206	-58.6866
		-57.4026	-56.2057	-57.0906		-57.6752	-57.3189	-58.6458
		-57.3865	-56.2042	-57.0674		-57.6772	-57.3192	-58.6083
		-57.371	-56.2037	-57.0423		-57.68	-57.3215	-58.5745
		-57.3561	-56.2042	-57.0155		-57.6831	-57.3255	-58.5442
		-57.3416	-56.2052	-56.9874		-57.6862	-57.3312	-58.5174
		-57.3275	-56.2065	-56.9584		-57.6891	-57.3383	-58.4941
		-57.3136	-56.2078	-56.9288		-57.6914	-57.3466	-58.474
		-57.2999	-56.2089	-56.8991		-57.6931	-57.3559	-58.457
		-57.2863	-56.2095	-56.8698		-57.6942	-57.3658	-58.4431
		-57.2728	-56.2094	-56.8412		-57.6947	-57.3761	-58.432
		-57.2593	-56.2085	-56.8137		-57.6948	-57.3867	-58.4238
		-57.246	-56.2066	-56.7877		-57.6945	-57.3971	-58.4181
		-57.2328	-56.2036	-56.7632		-57.6942	-57.4073	-58.4149
		-57.22	-56.1996	-56.7403		-57.6941	-57.4169	-58.4139
		-57.2075	-56.1945	-56.7191		-57.6944	-57.4258	-58.4148
		-57.1955	-56.1884	-56.6993		-57.6952	-57.4336	-58.4175
		-57.1841	-56.1814	-56.6807		-57.6967	-57.4402	-58.4216
		-57.1732	-56.1735	-56.6631		-57.6988	-57.4454	-58.4267
		-57.163	-56.1649	-56.6461		-57.7018	-57.4489	-58.4325
		-57.1534	-56.1556	-56.6293		-57.7053	-57.4508	-58.4386
		-57.1442	-56.1459	-56.6125		-57.7095	-57.4509	-58.4446
		-57.1355	-56.1358	-56.5955		-57.714	-57.4493	-58.45
		-57.1271	-56.1255	-56.5781		-57.7189	-57.446	-58.4545
		-57.1189	-56.1153	-56.5603		-57.7238	-57.4412	-58.4577
		-57.1107	-56.1052	-56.5424		-57.7286	-57.4351	-58.4594
		-57.1024	-56.0957	-56.5245		-57.7331	-57.4281	-58.4594
		-57.0939	-56.0867	-56.507		-57.7372	-57.4204	-58.4578
		-57.0852	-56.0786	-56.4902		-57.7408	-57.4125	-58.4546
		-57.0762	-56.0717	-56.4747		-57.7437	-57.4046	-58.4502
		-57.067	-56.0659	-56.4608		-57.746	-57.3973	-58.445
		-57.0576	-56.0615	-56.4489		-57.7477	-57.3906	-58.4396
		-57.048	-56.0586	-56.4392		-57.7486	-57.385	-58.4345
		-57.0384	-56.0571	-56.432		-57.7488	-57.3804	-58.4302
		-57.029	-56.057	-56.4272		-57.7484	-57.3771	-58.4273
		-57.0198	-56.0582	-56.4248		-57.7475	-57.3749	-58.4261
		-57.011	-56.0604	-56.4243		-57.746	-57.3738	-58.4266
		-57.0027	-56.0633	-56.4256		-57.744	-57.3736	-58.429
		-56.9952	-56.0668	-56.428		-57.7417	-57.3741	-58.4328
		-56.9885	-56.0706	-56.4312		-57.739	-57.375	-58.4377
		-56.9827	-56.0742	-56.4347		-57.736	-57.3761	-58.443
		-56.9779	-56.0776	-56.438		-57.7328	-57.3771	-58.4483
		-56.9741	-56.0805	-56.4407		-57.7294	-57.3779	-58.4528
		-56.9713	-56.0828	-56.4427		-57.7259	-57.3783	-58.4561
		-56.9695	-56.0844	-56.4437		-57.7222	-57.3781	-58.4579
		-56.9686	-56.0853	-56.4439		-57.7185	-57.3773	-58.458
		-56.9686	-56.0855	-56.4435		-57.7146	-57.3757	-58.4564
		-56.9692	-56.085	-56.4429		-57.7105	-57.3735	-58.4533
		-56.9705	-56.084	-56.4426		-57.7064	-57.3706	-58.449
		-56.9723	-56.0826	-56.4431		-57.702	-57.367	-58.444
		-56.9744	-56.0808	-56.4452		-57.6975	-57.3627	-58.4386
		-56.9767	-56.0789	-56.4496		-57.6927	-57.3576	-58.4332
		-56.9792	-56.0771	-56.457		-57.6876	-57.3518	-58.428
		-56.9816	-56.0753	-56.4677		-57.6821	-57.3452	-58.4231
		-56.984	-56.0739	-56.4824		-57.6763	-57.3375	-58.4186
		-56.9861	-56.0729	-56.5011		-57.6701	-57.3286	-58.414
		-56.988	-56.0724	-56.5238		-57.6635	-57.3183	-58.4091
		-56.9896	-56.0726	-56.5503		-57.6564	-57.3065	-58.4034
		-56.9909	-56.0735	-56.58		-57.6489	-57.293	-58.3964
		-56.9919	-56.0752	-56.6122		-57.6409	-57.2776	-58.3876
		-56.9926	-56.0777	-56.6457		-57.6325	-57.2603	-58.3767
		-56.9933	-56.0809	-56.6795		-57.6238	-57.2411	-58.3631
		-56.9939	-56.0847	-56.7123		-57.6146	-57.2199	-58.3469
		-56.9945	-56.0891	-56.7429		-57.605	-57.197	-58.3279
		-56.9954	-56.0939	-56.7702		-57.595	-57.1725	-58.3061
		-56.9967	-56.099	-56.7931		-57.5846	-57.1466	-58.2818
		-56.9983	-56.1043	-56.8109		-57.5736	-57.1196	-58.2552
		-57.0003	-56.1095	-56.8233		-57.5622	-57.0916	-58.2265
		-57.0027	-56.1146	-56.8299		-57.5502	-57.063	-58.1961
		-57.0054	-56.1194	-56.8311		-57.5375	-57.0339	-58.1642
		-57.0083	-56.124	-56.8273		-57.5241	-57.0046	-58.131
		-57.0114	-56.1282	-56.8193		-57.51	-56.9751	-58.0967
		-57.0144	-56.132	-56.8081		-57.4949	-56.9455	-58.0613
		-57.0172	-56.1355	-56.7946		-57.4789	-56.9158	-58.0248
		-57.0198	-56.1385	-56.7801		-57.4619	-56.8861	-57.9873
		-57.022	-56.1412	-56.7656		-57.4437	-56.8561	-57.9485
		-57.0238	-56.1434	-56.7523		-57.4244	-56.8259	-57.9085
		-57.0252	-56.1454	-56.7409		-57.4038	-56.7953	-57.8669
		-57.0262	-56.147	-56.7322		-57.382	-56.7643	-57.8237
		-57.0269	-56.1485	-56.7268		-57.3589	-56.7327	-57.7788
		-57.0272	-56.1498	-56.7249		-57.3345	-56.7006	-57.732
		-57.0273	-56.151	-56.7268		-57.3089	-56.6678	-57.6833
		-57.0271	-56.1523	-56.7324		-57.2822	-56.6345	-57.6327
		-57.0266	-56.1538	-56.7415		-57.2543	-56.6005	-57.5802
		-57.0257	-56.1556	-56.7538		-57.2255	-56.566	-57.5259
		-57.0246	-56.1577	-56.7689		-57.1958	-56.531	-57.4699
		-57.023	-56.1603	-56.7863		-57.1652	-56.4955	-57.4124
		-57.0211	-56.1634	-56.8055		-57.1339	-56.4594	-57.3536
		-57.0188	-56.167	-56.8257		-57.102	-56.4228	-57.2938
		-57.0162	-56.171	-56.8464		-57.0693	-56.3855	-57.2333
		-57.0134	-56.1753	-56.867		-57.036	-56.3474	-57.1724
		-57.0104	-56.1799	-56.8868		-57.002	-56.3083	-57.1113
		-57.0075	-56.1844	-56.9054		-56.9673	-56.2681	-57.0505
		-57.0049	-56.1888	-56.9221		-56.9318	-56.2266	-56.9902
		-57.0025	-56.1928	-56.9369		-56.8955	-56.1834	-56.9305
		-57.0007	-56.1964	-56.9493		-56.8583	-56.1386	-56.8716
		-56.9994	-56.1993	-56.9595		-56.8202	-56.0918	-56.8136
		-56.9987	-56.2014	-56.9676		-56.7812	-56.043	-56.7563
		-56.9985	-56.2027	-56.9737		-56.7412	-55.9921	-56.6997
		-56.9987	-56.2031	-56.9783		-56.7003	-55.939	-56.6434
		-56.9992	-56.2027	-56.982		-56.6585	-55.8838	-56.5872
		-56.9999	-56.2014	-56.9851		-56.6158	-55.8264	-56.5308
		-57.0005	-56.1992	-56.9884		-56.5724	-55.767	-56.4738
		-57.001	-56.1964	-56.9922		-56.5282	-55.7056	-56.4158
		-57.0012	-56.193	-56.9972		-56.4835	-55.6425	-56.3566
		-57.0011	-56.1891	-57.0037		-56.4382	-55.5778	-56.296
		-57.0007	-56.1848	-57.0119		-56.3925	-55.5117	-56.234
		-57	-56.1803	-57.0221		-56.3465	-55.4443	-56.1706
		-56.9992	-56.1757	-57.0343		-56.3001	-55.3758	-56.1059
		-56.9985	-56.1712	-57.0482		-56.2534	-55.3063	-56.0402
		-56.9979	-56.1668	-57.0639		-56.2064	-55.2361	-55.9738
		-56.9977	-56.1628	-57.0808		-56.1589	-55.1651	-55.9072
		-56.998	-56.1591	-57.0988		-56.111	-55.0936	-55.8405
		-56.9988	-56.156	-57.1174		-56.0626	-55.0215	-55.7742
		-57.0003	-56.1535	-57.1362		-56.0134	-54.9488	-55.7084
		-57.0023	-56.1517	-57.1549		-55.9636	-54.8756	-55.6433
		-57.0047	-56.1507	-57.1732		-55.9129	-54.8018	-55.5788
		-57.0076	-56.1504	-57.1908		-55.8614	-54.7274	-55.5148
		-57.0107	-56.1509	-57.2076		-55.8091	-54.6524	-55.4509
		-57.014	-56.1523	-57.2236		-55.7558	-54.5765	-55.3868
		-57.0173	-56.1544	-57.2385		-55.7017	-54.4998	-55.322
		-57.0205	-56.1573	-57.2526		-55.6467	-54.4221	-55.2561
		-57.0235	-56.161	-57.2658		-55.5908	-54.3433	-55.1886
		-57.0264	-56.1654	-57.2782		-55.5338	-54.263	-55.119
		-57.0292	-56.1705	-57.2899		-55.4758	-54.181	-55.0471
		-57.0318	-56.1763	-57.301		-55.4165	-54.0971	-54.9725
		-57.0345	-56.183	-57.3114		-55.3559	-54.0107	-54.8951
		-57.0373	-56.1904	-57.3214		-55.2937	-53.9215	-54.8148
		-57.0401	-56.1987	-57.3309		-55.2297	-53.8288	-54.7315
		-57.0431	-56.2079	-57.34		-55.1639	-53.7323	-54.6453
		-57.0461	-56.218	-57.3486		-55.0959	-53.6312	-54.5564
		-57.0492	-56.229	-57.3569		-55.0257	-53.525	-54.4647
		-57.0522	-56.2409	-57.3649		-54.9532	-53.4131	-54.3705
		-57.055	-56.2535	-57.3726		-54.8783	-53.2951	-54.274
		-57.0575	-56.2669	-57.3799		-54.8011	-53.1705	-54.1752
		-57.0595	-56.2808	-57.3868		-54.7214	-53.039	-54.0745
		-57.0609	-56.2952	-57.3934		-54.6393	-52.9003	-53.9719
		-57.0616	-56.3097	-57.3995		-54.5549	-52.7543	-53.8675
		-57.0614	-56.3242	-57.4053		-54.4681	-52.601	-53.7614
		-57.0605	-56.3385	-57.4105		-54.3789	-52.4403	-53.6538
		-57.0588	-56.3526	-57.4153		-54.2874	-52.2724	-53.5445
		-57.0563	-56.3661	-57.4196		-54.1934	-52.0974	-53.4335
		-57.0533	-56.3791	-57.4235		-54.0969	-51.9154	-53.3207
		-57.0497	-56.3914	-57.427		-53.9979	-51.7267	-53.2056
		-57.0457	-56.4032	-57.4302		-53.8963	-51.5315	-53.0882
		-57.0415	-56.4143	-57.4332		-53.792	-51.3299	-52.9678
		-57.0372	-56.425	-57.4361		-53.6849	-51.1221	-52.8442
		-57.033	-56.4351	-57.439		-53.575	-50.9081	-52.7167
		-57.029	-56.4448	-57.442		-53.4624	-50.6879	-52.5851
		-57.0253	-56.4543	-57.4452		-53.347	-50.4615	-52.4487
		-57.0223	-56.4634	-57.4485		-53.2289	-50.2288	-52.3072
		-57.0201	-56.4723	-57.4522		-53.1082	-49.9897	-52.1601
		-57.0188	-56.4809	-57.4561		-52.985	-49.744	-52.0072
		-57.0187	-56.4893	-57.4603		-52.8595	-49.4915	-51.8481
		-57.02	-56.4975	-57.4649		-52.7318	-49.2318	-51.6827
		-57.0227	-56.5054	-57.4699		-52.6022	-48.9649	-51.5109
		-57.027	-56.513	-57.4752		-52.4708	-48.6903	-51.3325
		-57.0329	-56.5203	-57.4809		-52.3379	-48.4079	-51.1476
		-57.0403	-56.5272	-57.4869		-52.2037	-48.1174	-50.9561
		-57.0489	-56.5338	-57.4934		-52.0685	-47.8186	-50.7582
		-57.0587	-56.5402	-57.5		-51.9324	-47.5115	-50.5537
		-57.0693	-56.5462	-57.5069		-51.7958	-47.1957	-50.3428
		-57.0804	-56.552	-57.5138		-51.6589	-46.8712	-50.1255
		-57.0916	-56.5576	-57.5206		-51.5218	-46.5378	-49.9019
		-57.1027	-56.563	-57.5271		-51.3848	-46.1954	-49.6718
		-57.1133	-56.5683	-57.5331		-51.2481	-45.8437	-49.4353
		-57.1232	-56.5734	-57.5384		-51.1119	-45.4825	-49.1921
		-57.1324	-56.5784	-57.5431		-50.9762	-45.1115	-48.9421
		-57.1407	-56.5833	-57.5469		-50.8413	-44.7303	-48.6849
		-57.1481	-56.5881	-57.5498		-50.7073	-44.3385	-48.42
		-57.1548	-56.5928	-57.552		-50.5743	-43.9356	-48.1468
		-57.1608	-56.5973	-57.5534		-50.4425	-43.5211	-47.8646
		-57.1662	-56.6016	-57.5542		-50.312	-43.0943	-47.5726
		-57.1712	-56.6057	-57.5544		-50.1829	-42.6548	-47.2698
		-57.1757	-56.6095	-57.554		-50.0555	-42.2018	-46.9553
		-57.1796	-56.6129	-57.5529		-49.9298	-41.7349	-46.6278
		-57.1828	-56.6157	-57.5508		-49.8062	-41.2534	-46.2865
		-57.1848	-56.6177	-57.5471		-49.6848	-40.757	-45.9302
		-57.1851	-56.6183	-57.541		-49.5659	-40.2453	-45.5579
		-57.1827	-56.6169	-57.531		-49.4497	-39.7181	-45.1688
		-57.1764	-56.6124	-57.515		-49.3367	-39.1753	-44.7621
		-57.1648	-56.6036	-57.4902		-49.2269	-38.6172	-44.337
		-57.1458	-56.5885	-57.4526		-49.1209	-38.044	-43.893
		-57.1172	-56.5648	-57.3974		-49.0188	-37.4564	-43.4298
		-57.0763	-56.5296	-57.3183		-48.921	-36.8551	-42.9471
		-57.0202	-56.4795	-57.2084		-48.8277	-36.2413	-42.4447
		-56.946	-56.4108	-57.0595		-48.7391	-35.616	-41.9227
		-56.8509	-56.32	-56.8635		-48.6553	-34.9808	-41.3813
		-56.7329	-56.2036	-56.6126		-48.5766	-34.3373	-40.8209
		-56.5912	-56.0597	-56.3011		-48.5029	-33.6871	-40.2421
		-56.4267	-55.8877	-55.9261		-48.4343	-33.0321	-39.6456
		-56.2431	-55.69	-55.4899		-48.3706	-32.3742	-39.0325
		-56.0471	-55.472	-55.0013		-48.3119	-31.7154	-38.404
		-55.8495	-55.2437	-54.4772		-48.2579	-31.0575	-37.7616
		-55.6651	-55.0195	-53.944		-48.2085	-30.4027	-37.1072
		-55.5129	-54.8187	-53.4378		-48.1636	-29.7528	-36.4429
		-55.4154	-54.665	-53.0034		-48.123	-29.1099	-35.771
		-55.3976	-54.5851	-52.6927		-48.0866	-28.4759	-35.0943
		-55.4849	-54.6073	-52.5612		-48.0543	-27.8525	-34.4157
		-55.7011	-54.7591	-52.6631		-48.0261	-27.2416	-33.7383
		-56.0656	-55.0639	-53.0462		-48.0018	-26.645	-33.0656
		-56.5905	-55.5385	-53.745		-47.9815	-26.0641	-32.401
		-57.2778	-56.1895	-54.7753		-47.9651	-25.5007	-31.7482
		-58.1176	-57.0114	-56.1287		-47.9524	-24.956	-31.1107
		-59.0865	-57.9841	-57.7696		-47.9434	-24.4313	-30.4919
		-60.1478	-59.0735	-59.6341		-47.9379	-23.9279	-29.8952
		-61.2524	-60.2314	-61.632		-47.9358	-23.4468	-29.3236
		-62.3423	-61.399	-63.6513		-47.9368	-22.9889	-28.7799
		-63.3536	-62.5101	-65.5665		-47.9407	-22.5551	-28.2667
		-64.222	-63.4963	-67.2477		-47.9471	-22.146	-27.7859
		-64.8882	-64.2927	-68.5722		-47.9559	-21.7624	-27.3394
		-65.3029	-64.8437	-69.4353		-47.9667	-21.4047	-26.9287
		-65.4318	-65.108	-69.7609		-47.9794	-21.0734	-26.5549
		-65.2588	-65.0625	-69.5087		-47.9938	-20.7689	-26.2188
		-64.7879	-64.7053	-68.6793		-48.0097	-20.4913	-25.9211
		-64.0436	-64.0554	-67.3148		-48.0271	-20.241	-25.6622
		-63.0684	-63.1518	-65.4958		-48.0457	-20.0179	-25.4423
		-61.9196	-62.0501	-63.3346		-48.0658	-19.822	-25.2613
		-60.6645	-60.8174	-60.9654		-48.0872	-19.6532	-25.1193
		-59.3745	-59.5267	-58.5332		-48.1099	-19.5113	-25.0159
		-58.1195	-58.2509	-56.1808		-48.134	-19.396	-24.9507
		-56.9625	-57.057	-54.0383		-48.1594	-19.3069	-24.9232
		-55.9549	-56.001	-52.2124		-48.1862	-19.2435	-24.9328
		-55.1341	-55.1249	-50.7804		-48.2143	-19.2054	-24.9788
		-54.5211	-54.4544	-49.7856		-48.2436	-19.1919	-25.0601
		-54.1213	-53.9984	-49.2378		-48.2742	-19.2026	-25.1758
		-53.9256	-53.7511	-49.1154		-48.3058	-19.2367	-25.3249
		-53.913	-53.6933	-49.3713		-48.3384	-19.2938	-25.506
		-54.054	-53.7969	-49.9394		-48.3719	-19.3732	-25.7178
		-54.314	-54.0273	-50.7429		-48.406	-19.4742	-25.9589
		-54.6568	-54.3482	-51.7013		-48.4406	-19.5965	-26.2277
		-55.0479	-54.7241	-52.7379		-48.4755	-19.7393	-26.5228
		-55.4562	-55.1228	-53.7847		-48.5106	-19.9022	-26.8422
		-55.8563	-55.5176	-54.7861		-48.5457	-20.0848	-27.1843
		-56.2289	-55.888	-55.7009		-48.5805	-20.2864	-27.5473
		-56.5609	-56.22	-56.5022		-48.6149	-20.5066	-27.9291
		-56.845	-56.5054	-57.1765		-48.6488	-20.745	-28.3279
		-57.079	-56.7412	-57.7214		-48.682	-21.0011	-28.7416
		-57.2645	-56.9285	-58.1433		-48.7144	-21.2743	-29.1684
		-57.4057	-57.0713	-58.4547		-48.7458	-21.5641	-29.6062
		-57.5086	-57.1754	-58.6714		-48.7761	-21.8699	-30.053
		-57.58	-57.2473	-58.8104		-48.8054	-22.1912	-30.5071
		-57.6266	-57.2938	-58.8885		-48.8336	-22.5272	-30.9665
		-57.6547	-57.321	-58.9209		-48.8606	-22.8772	-31.4294
		-57.6698	-57.3345	-58.9209		-48.8865	-23.2404	-31.894
		-57.6763	-57.3389	-58.8991		-48.9115	-23.6161	-32.3587
		-57.6778	-57.3376	-58.8638		-48.9354	-24.0034	-32.8219
		-57.6769	-57.3335	-58.8213		-48.9586	-24.4015	-33.2819
		-57.6754	-57.3285	-58.7758		-48.981	-24.8096	-33.7373
		-57.6743	-57.3239	-58.7303		-49.0029	-25.2269	-34.1867
		-57.6742	-57.3206	-58.6866		-49.0244	-25.6526	-34.6286
		-57.6752	-57.3189	-58.6458		-49.0456	-26.086	-35.0621
		-57.6772	-57.3192	-58.6083		-49.0667	-26.5264	-35.4859
		-57.68	-57.3215	-58.5745		-49.0877	-26.9732	-35.8992
		-57.6831	-57.3255	-58.5442		-49.1088	-27.4257	-36.3012
		-57.6862	-57.3312	-58.5174		-49.13	-27.8833	-36.6913
		-57.6891	-57.3383	-58.4941		-49.1513	-28.3454	-37.069
		-57.6914	-57.3466	-58.474		-49.1727	-28.8113	-37.4341
		-57.6931	-57.3559	-58.457		-49.1942	-29.2804	-37.7862
		-57.6942	-57.3658	-58.4431		-49.2156	-29.7519	-38.1253
		-57.6947	-57.3761	-58.432		-49.2367	-30.2249	-38.4513
		-57.6948	-57.3867	-58.4238		-49.2575	-30.6986	-38.7644
		-57.6945	-57.3971	-58.4181		-49.2778	-31.1719	-39.0647
		-57.6942	-57.4073	-58.4149		-49.2973	-31.6439	-39.3522
		-57.6941	-57.4169	-58.4139		-49.316	-32.1133	-39.6273
		-57.6944	-57.4258	-58.4148		-49.3338	-32.5791	-39.8903
		-57.6952	-57.4336	-58.4175		-49.3504	-33.0402	-40.1417
		-57.6967	-57.4402	-58.4216		-49.366	-33.4953	-40.382
		-57.6988	-57.4454	-58.4267		-49.3804	-33.9434	-40.6118
		-57.7018	-57.4489	-58.4325		-49.3938	-34.3834	-40.832
		-57.7053	-57.4508	-58.4386		-49.4063	-34.8146	-41.0434
		-57.7095	-57.4509	-58.4446		-49.4181	-35.2359	-41.247
		-57.714	-57.4493	-58.45		-49.4292	-35.6469	-41.4438
		-57.7189	-57.446	-58.4545		-49.4399	-36.0469	-41.6347
		-57.7238	-57.4412	-58.4577		-49.4503	-36.4356	-41.8206
		-57.7286	-57.4351	-58.4594		-49.4607	-36.8126	-42.0024
		-57.7331	-57.4281	-58.4594		-49.4712	-37.1779	-42.1807
		-57.7372	-57.4204	-58.4578		-49.4818	-37.5314	-42.356
		-57.7408	-57.4125	-58.4546		-49.4927	-37.8733	-42.5286
		-57.7437	-57.4046	-58.4502		-49.504	-38.2036	-42.6986
		-57.746	-57.3973	-58.445		-49.5156	-38.5226	-42.8661
		-57.7477	-57.3906	-58.4396		-49.5277	-38.8307	-43.0308
		-57.7486	-57.385	-58.4345		-49.5403	-39.1279	-43.1926
		-57.7488	-57.3804	-58.4302		-49.5533	-39.4147	-43.3512
		-57.7484	-57.3771	-58.4273		-49.5668	-39.6914	-43.5064
		-57.7475	-57.3749	-58.4261		-49.5809	-39.9581	-43.6578
		-57.746	-57.3738	-58.4266		-49.5956	-40.2152	-43.8052
		-57.744	-57.3736	-58.429		-49.6108	-40.4628	-43.9485
		-57.7417	-57.3741	-58.4328		-49.6265	-40.7012	-44.0875
		-57.739	-57.375	-58.4377		-49.6427	-40.9307	-44.2222
		-57.736	-57.3761	-58.443		-49.6593	-41.1513	-44.3525
		-57.7328	-57.3771	-58.4483		-49.6763	-41.3634	-44.4786
		-57.7294	-57.3779	-58.4528		-49.6933	-41.5672	-44.6004
		-57.7259	-57.3783	-58.4561		-49.7105	-41.763	-44.7181
		-57.7222	-57.3781	-58.4579		-49.7274	-41.9509	-44.8317
		-57.7185	-57.3773	-58.458		-49.7441	-42.1314	-44.9415
		-57.7146	-57.3757	-58.4564		-49.7603	-42.3047	-45.0475
		-57.7105	-57.3735	-58.4533		-49.776	-42.4713	-45.1499
		-57.7064	-57.3706	-58.449		-49.791	-42.6314	-45.2488
		-57.702	-57.367	-58.444		-49.8051	-42.7854	-45.3443
		-57.6975	-57.3627	-58.4386		-49.8184	-42.9337	-45.4365
		-57.6927	-57.3576	-58.4332		-49.8308	-43.0766	-45.5254
		-57.6876	-57.3518	-58.428		-49.8423	-43.2145	-45.611
		-57.6821	-57.3452	-58.4231		-49.8528	-43.3477	-45.6933
		-57.6763	-57.3375	-58.4186		-49.8625	-43.4763	-45.7723
		-57.6701	-57.3286	-58.414		-49.8713	-43.6007	-45.8479
		-57.6635	-57.3183	-58.4091		-49.8794	-43.7211	-45.9201
		-57.6564	-57.3065	-58.4034		-49.8867	-43.8376	-45.9888
		-57.6489	-57.293	-58.3964		-49.8935	-43.9505	-46.054
		-57.6409	-57.2776	-58.3876		-49.8998	-44.0598	-46.1157
		-57.6325	-57.2603	-58.3767		-49.9057	-44.1658	-46.1742
		-57.6238	-57.2411	-58.3631		-49.9115	-44.2684	-46.2296
		-57.6146	-57.2199	-58.3469		-49.9171	-44.368	-46.2822
		-57.605	-57.197	-58.3279		-49.9229	-44.4646	-46.3324
		-57.595	-57.1725	-58.3061		-49.9289	-44.5583	-46.3808
		-57.5846	-57.1466	-58.2818		-49.9352	-44.6494	-46.4277
		-57.5736	-57.1196	-58.2552		-49.942	-44.7381	-46.4737
		-57.5622	-57.0916	-58.2265		-49.9494	-44.8244	-46.5193
		-57.5502	-57.063	-58.1961		-49.9574	-44.9085	-46.5649
		-57.5375	-57.0339	-58.1642		-49.9661	-44.9905	-46.6108
		-57.5241	-57.0046	-58.131		-49.9755	-45.0705	-46.6572
		-57.51	-56.9751	-58.0967		-49.9857	-45.1487	-46.7042
		-57.4949	-56.9455	-58.0613		-49.9964	-45.2248	-46.7518
		-57.4789	-56.9158	-58.0248		-50.0077	-45.2991	-46.7999
		-57.4619	-56.8861	-57.9873		-50.0193	-45.3713	-46.8483
		-57.4437	-56.8561	-57.9485		-50.0311	-45.4414	-46.8968
		-57.4244	-56.8259	-57.9085		-50.0429	-45.5093	-46.9451
		-57.4038	-56.7953	-57.8669		-50.0545	-45.5749	-46.9929
		-57.382	-56.7643	-57.8237		-50.0656	-45.6381	-47.04
		-57.3589	-56.7327	-57.7788		-50.0761	-45.699	-47.0863
		-57.3345	-56.7006	-57.732		-50.0858	-45.7576	-47.1316
		-57.3089	-56.6678	-57.6833		-50.0945	-45.8139	-47.176
		-57.2822	-56.6345	-57.6327		-50.1023	-45.868	-47.2192
		-57.2543	-56.6005	-57.5802		-50.1091	-45.9203	-47.2614
		-57.2255	-56.566	-57.5259		-50.1147	-45.9708	-47.3024
		-57.1958	-56.531	-57.4699		-50.1194	-46.0199	-47.3421
		-57.1652	-56.4955	-57.4124		-50.1231	-46.0678	-47.3805
		-57.1339	-56.4594	-57.3536		-50.1258	-46.1149	-47.4174
		-57.102	-56.4228	-57.2938		-50.1277	-46.1614	-47.4527
		-57.0693	-56.3855	-57.2333		-50.1289	-46.2074	-47.4863
		-57.036	-56.3474	-57.1724		-50.1295	-46.2533	-47.5179
		-57.002	-56.3083	-57.1113		-50.1295	-46.299	-47.5475
		-56.9673	-56.2681	-57.0505		-50.1292	-46.3446	-47.5751
		-56.9318	-56.2266	-56.9902		-50.1286	-46.3899	-47.6009
		-56.8955	-56.1834	-56.9305		-50.1278	-46.4349	-47.625
		-56.8583	-56.1386	-56.8716		-50.1269	-46.4794	-47.6477
		-56.8202	-56.0918	-56.8136		-50.1261	-46.523	-47.6694
		-56.7812	-56.043	-56.7563		-50.1254	-46.5655	-47.6907
		-56.7412	-55.9921	-56.6997		-50.1248	-46.6067	-47.712
		-56.7003	-55.939	-56.6434		-50.1243	-46.6464	-47.7339
		-56.6585	-55.8838	-56.5872		-50.1239	-46.6842	-47.7568
		-56.6158	-55.8264	-56.5308		-50.1235	-46.7203	-47.7812
		-56.5724	-55.767	-56.4738		-50.1229	-46.7546	-47.8074
		-56.5282	-55.7056	-56.4158		-50.1221	-46.7872	-47.8357
		-56.4835	-55.6425	-56.3566		-50.1208	-46.8184	-47.866
		-56.4382	-55.5778	-56.296		-50.1189	-46.8483	-47.8983
		-56.3925	-55.5117	-56.234		-50.1162	-46.8773	-47.9323
		-56.3465	-55.4443	-56.1706		-50.1127	-46.9057	-47.9677
		-56.3001	-55.3758	-56.1059		-50.1083	-46.9338	-48.0041
		-56.2534	-55.3063	-56.0402		-50.1029	-46.9618	-48.041
		-56.2064	-55.2361	-55.9738		-50.0967	-46.9898	-48.0778
		-56.1589	-55.1651	-55.9072		-50.0897	-47.0179	-48.1141
		-56.111	-55.0936	-55.8405		-50.0823	-47.0462	-48.1495
		-56.0626	-55.0215	-55.7742		-50.0747	-47.0744	-48.1838
		-56.0134	-54.9488	-55.7084		-50.0671	-47.1024	-48.2168
		-55.9636	-54.8756	-55.6433		-50.06	-47.1301	-48.2483
		-55.9129	-54.8018	-55.5788		-50.0536	-47.1571	-48.2786
		-55.8614	-54.7274	-55.5148		-50.0482	-47.1831	-48.3077
		-55.8091	-54.6524	-55.4509		-50.0442	-47.2081	-48.3361
		-55.7558	-54.5765	-55.3868		-50.0417	-47.2317	-48.3641
		-55.7017	-54.4998	-55.322		-50.0407	-47.2539	-48.3921
		-55.6467	-54.4221	-55.2561		-50.0415	-47.2746	-48.4205
		-55.5908	-54.3433	-55.1886		-50.0438	-47.2938	-48.4499
		-55.5338	-54.263	-55.119		-50.0476	-47.3115	-48.4804
		-55.4758	-54.181	-55.0471		-50.0527	-47.3279	-48.5124
		-55.4165	-54.0971	-54.9725		-50.0588	-47.3431	-48.5461
		-55.3559	-54.0107	-54.8951		-50.0656	-47.3574	-48.5816
		-55.2937	-53.9215	-54.8148		-50.0728	-47.3709	-48.6187
		-55.2297	-53.8288	-54.7315		-50.08	-47.3841	-48.6573
		-55.1639	-53.7323	-54.6453		-50.0869	-47.397	-48.6971
		-55.0959	-53.6312	-54.5564		-50.0933	-47.41	-48.7376
		-55.0257	-53.525	-54.4647		-50.0989	-47.4233	-48.7785
		-54.9532	-53.4131	-54.3705		-50.1036	-47.437	-48.8191
		-54.8783	-53.2951	-54.274		-50.1071	-47.4514	-48.8591
		-54.8011	-53.1705	-54.1752		-50.1096	-47.4663	-48.898
		-54.7214	-53.039	-54.0745		-50.111	-47.482	-48.9354
		-54.6393	-52.9003	-53.9719		-50.1112	-47.4982	-48.971
		-54.5549	-52.7543	-53.8675		-50.1106	-47.5149	-49.0047
		-54.4681	-52.601	-53.7614		-50.109	-47.5318	-49.0366
		-54.3789	-52.4403	-53.6538		-50.1068	-47.5488	-49.0665
		-54.2874	-52.2724	-53.5445		-50.1038	-47.5655	-49.0948
		-54.1934	-52.0974	-53.4335		-50.1003	-47.5818	-49.1215
		-54.0969	-51.9154	-53.3207		-50.0963	-47.5973	-49.1469
		-53.9979	-51.7267	-53.2056		-50.0919	-47.6119	-49.171
		-53.8963	-51.5315	-53.0882		-50.087	-47.6255	-49.194
		-53.792	-51.3299	-52.9678		-50.0817	-47.6379	-49.216
		-53.6849	-51.1221	-52.8442		-50.076	-47.6492	-49.2369
		-53.575	-50.9081	-52.7167		-50.0699	-47.6595	-49.2568
		-53.4624	-50.6879	-52.5851		-50.0635	-47.669	-49.2755
		-53.347	-50.4615	-52.4487		-50.057	-47.6778	-49.2932
		-53.2289	-50.2288	-52.3072		-50.0504	-47.6862	-49.3099
		-53.1082	-49.9897	-52.1601		-50.0439	-47.6946	-49.3256
		-52.985	-49.744	-52.0072		-50.0376	-47.7031	-49.3407
		-52.8595	-49.4915	-51.8481		-50.0319	-47.7121	-49.3553
		-52.7318	-49.2318	-51.6827		-50.0267	-47.7217	-49.3699
		-52.6022	-48.9649	-51.5109		-50.0221	-47.7319	-49.3849
		-52.4708	-48.6903	-51.3325		-50.0183	-47.743	-49.4006
		-52.3379	-48.4079	-51.1476		-50.0152	-47.7548	-49.4173
		-52.2037	-48.1174	-50.9561		-50.0126	-47.7674	-49.4353
		-52.0685	-47.8186	-50.7582		-50.0104	-47.7804	-49.4547
		-51.9324	-47.5115	-50.5537		-50.0084	-47.7937	-49.4754
		-51.7958	-47.1957	-50.3428		-50.0063	-47.8072	-49.4973
		-51.6589	-46.8712	-50.1255		-50.0038	-47.8205	-49.52
		-51.5218	-46.5378	-49.9019		-50.0007	-47.8335	-49.5431
		-51.3848	-46.1954	-49.6718		-49.9968	-47.8459	-49.5662
		-51.2481	-45.8437	-49.4353		-49.992	-47.8577	-49.5887
		-51.1119	-45.4825	-49.1921		-49.9862	-47.8687	-49.61
		-50.9762	-45.1115	-48.9421		-49.9794	-47.879	-49.6299
		-50.8413	-44.7303	-48.6849		-49.9717	-47.8885	-49.6477
		-50.7073	-44.3385	-48.42		-49.9634	-47.8974	-49.6633
		-50.5743	-43.9356	-48.1468		-49.9545	-47.9057	-49.6763
		-50.4425	-43.5211	-47.8646		-49.9453	-47.9137	-49.6867
		-50.312	-43.0943	-47.5726		-49.936	-47.9214	-49.6944
		-50.1829	-42.6548	-47.2698		-49.9268	-47.929	-49.6992
		-50.0555	-42.2018	-46.9553		-49.9178	-47.9363	-49.7013
		-49.9298	-41.7349	-46.6278		-49.909	-47.9435	-49.7006
		-49.8062	-41.2534	-46.2865		-49.9003	-47.9502	-49.6969
		-49.6848	-40.757	-45.9302		-49.8916	-47.9561	-49.6901
		-49.5659	-40.2453	-45.5579		-49.8823	-47.9607	-49.6795
		-49.4497	-39.7181	-45.1688		-49.8718	-47.9633	-49.6643
		-49.3367	-39.1753	-44.7621		-49.8592	-47.9626	-49.643
		-49.2269	-38.6172	-44.337		-49.8432	-47.9573	-49.6134
		-49.1209	-38.044	-43.893		-49.822	-47.9455	-49.5722
		-49.0188	-37.4564	-43.4298		-49.7935	-47.9249	-49.5153
		-48.921	-36.8551	-42.9471		-49.7551	-47.8928	-49.4371
		-48.8277	-36.2413	-42.4447		-49.7039	-47.8457	-49.3312
		-48.7391	-35.616	-41.9227		-49.6368	-47.7804	-49.1901
		-48.6553	-34.9808	-41.3813		-49.5507	-47.6934	-49.0061
		-48.5766	-34.3373	-40.8209		-49.4432	-47.5815	-48.7718
		-48.5029	-33.6871	-40.2421		-49.3131	-47.4428	-48.4818
		-48.4343	-33.0321	-39.6456		-49.1608	-47.2773	-48.1335
		-48.3706	-32.3742	-39.0325		-48.9895	-47.0872	-47.7295
		-48.3119	-31.7154	-38.404		-48.8058	-46.8786	-47.2789
		-48.2579	-31.0575	-37.7616		-48.6202	-46.6618	-46.7989
		-48.2085	-30.4027	-37.1072		-48.4477	-46.4518	-46.3163
		-48.1636	-29.7528	-36.4429		-48.3077	-46.2687	-45.8677
		-48.123	-29.1099	-35.771		-48.2232	-46.1369	-45.4985
		-48.0866	-28.4759	-35.0943		-48.2203	-46.0843	-45.2614
		-48.0543	-27.8525	-34.4157		-48.3253	-46.1404	-45.2126
		-48.0261	-27.2416	-33.7383		-48.5635	-46.3336	-45.4072
		-48.0018	-26.645	-33.0656		-48.9552	-46.6883	-45.8934
		-47.9815	-26.0641	-32.401		-49.5135	-47.222	-46.7061
		-47.9651	-25.5007	-31.7482		-50.2411	-47.9415	-47.8608
		-47.9524	-24.956	-31.1107		-51.128	-48.8405	-49.3484
		-47.9434	-24.4313	-30.4919		-52.1504	-49.898	-51.1315
		-47.9379	-23.9279	-29.8952		-53.2701	-51.0774	-53.1434
		-47.9358	-23.4468	-29.3236		-54.4363	-52.3281	-55.2902
		-47.9368	-22.9889	-28.7799		-55.588	-53.5875	-57.4553
		-47.9407	-22.5551	-28.2667		-56.6583	-54.7854	-59.5077
		-47.9471	-22.146	-27.7859		-57.5798	-55.8496	-61.3118
		-47.9559	-21.7624	-27.3394		-58.2897	-56.711	-62.7392
		-47.9667	-21.4047	-26.9287		-58.736	-57.3107	-63.6802
		-47.9794	-21.0734	-26.5549		-58.8819	-57.6048	-64.0542
		-47.9938	-20.7689	-26.2188		-58.71	-57.5686	-63.8185
		-48.0097	-20.4913	-25.9211		-58.2239	-57.1998	-62.9726
		-48.0271	-20.241	-25.6622		-57.4484	-56.5183	-61.5597
		-48.0457	-20.0179	-25.4423		-56.4278	-55.5651	-59.6632
		-48.0658	-19.822	-25.2613		-55.2217	-54.3985	-57.3999
		-48.0872	-19.6532	-25.1193		-53.9	-53.0892	-54.9096
		-48.1099	-19.5113	-25.0159		-52.5374	-51.7141	-52.3437
		-48.134	-19.396	-24.9507		-51.207	-50.3498	-49.8518
		-48.1594	-19.3069	-24.9232		-49.9745	-49.0672	-47.5699
		-48.1862	-19.2435	-24.9328		-48.8941	-47.9253	-45.6104
		-48.2143	-19.2054	-24.9788		-48.0048	-46.9688	-44.0547
		-48.2436	-19.1919	-25.0601		-47.3291	-46.2251	-42.9494
		-48.2742	-19.2026	-25.1758		-46.8733	-45.7047	-42.3056
		-48.3058	-19.2367	-25.3249		-46.6283	-45.402	-42.1022
		-48.3384	-19.2938	-25.506		-46.5732	-45.2982	-42.2915
		-48.3719	-19.3732	-25.7178		-46.6779	-45.3646	-42.806
		-48.406	-19.4742	-25.9589		-46.9072	-45.5663	-43.5669
		-48.4406	-19.5965	-26.2277		-47.2242	-45.866	-44.492
		-48.4755	-19.7393	-26.5228		-47.5937	-46.227	-45.5026
		-48.5106	-19.9022	-26.8422		-47.9839	-46.6165	-46.529
		-48.5457	-20.0848	-27.1843		-48.369	-47.0067	-47.5145
		-48.5805	-20.2864	-27.5473		-48.7291	-47.3762	-48.4169
		-48.6149	-20.5066	-27.9291		-49.0509	-47.7101	-49.2088
		-48.6488	-20.745	-28.3279		-49.3268	-47.9994	-49.8765
		-48.682	-21.0011	-28.7416		-49.5541	-48.2406	-50.4175
		-48.7144	-21.2743	-29.1684		-49.7343	-48.4342	-50.8385
		-48.7458	-21.5641	-29.6062		-49.8713	-48.5836	-51.1516
		-48.7761	-21.8699	-30.053		-49.9708	-48.6943	-51.3728
		-48.8054	-22.1912	-30.5071		-50.0393	-48.7725	-51.5191
		-48.8336	-22.5272	-30.9665		-50.083	-48.8247	-51.6072
		-48.8606	-22.8772	-31.4294		-50.1079	-48.8571	-51.6522
		-48.8865	-23.2404	-31.894		-50.1192	-48.8749	-51.667
		-48.9115	-23.6161	-32.3587		-50.1211	-48.8828	-51.6621
		-48.9354	-24.0034	-32.8219		-50.117	-48.8845	-51.6458
		-48.9586	-24.4015	-33.2819		-50.1093	-48.8827	-51.6239
		-48.981	-24.8096	-33.7373		-50.0999	-48.8794	-51.6009
		-49.0029	-25.2269	-34.1867		-50.0898	-48.8762	-51.5794
		-49.0244	-25.6526	-34.6286		-50.0799	-48.8739	-51.5612
		-49.0456	-26.086	-35.0621		-50.0705	-48.8731	-51.5472
		-49.0667	-26.5264	-35.4859		-50.0619	-48.874	-51.5376
		-49.0877	-26.9732	-35.8992		-50.054	-48.8765	-51.5324
		-49.1088	-27.4257	-36.3012		-50.0468	-48.8807	-51.5313
		-49.13	-27.8833	-36.6913		-50.04	-48.8862	-51.5337
		-49.1513	-28.3454	-37.069		-50.0337	-48.8928	-51.5393
		-49.1727	-28.8113	-37.4341		-50.0275	-48.9002	-51.5474
		-49.1942	-29.2804	-37.7862		-50.0215	-48.9082	-51.5576
		-49.2156	-29.7519	-38.1253		-50.0153	-48.9167	-51.5694
		-49.2367	-30.2249	-38.4513		-50.0092	-48.9255	-51.5825
		-49.2575	-30.6986	-38.7644		-50.0029	-48.9344	-51.5966
		-49.2778	-31.1719	-39.0647		-49.9966	-48.9435	-51.6115
		-49.2973	-31.6439	-39.3522		-49.9905	-48.9527	-51.627
		-49.316	-32.1133	-39.6273		-49.9847	-48.9621	-51.6431
		-49.3338	-32.5791	-39.8903		-49.9793	-48.9718	-51.6597
		-49.3504	-33.0402	-40.1417		-49.9746	-48.9818	-51.677
		-49.366	-33.4953	-40.382		-49.9706	-48.9921	-51.6948
		-49.3804	-33.9434	-40.6118		-49.9676	-49.0028	-51.7133
		-49.3938	-34.3834	-40.832		-49.9654	-49.0138	-51.7325
		-49.4063	-34.8146	-41.0434		-49.9641	-49.0253	-51.7525
		-49.4181	-35.2359	-41.247		-49.9635	-49.037	-51.7732
		-49.4292	-35.6469	-41.4438		-49.9634	-49.0489	-51.7946
		-49.4399	-36.0469	-41.6347		-49.9635	-49.0607	-51.8166
		-49.4503	-36.4356	-41.8206		-49.9635	-49.0725	-51.8392
		-49.4607	-36.8126	-42.0024		-49.9631	-49.0838	-51.8622
		-49.4712	-37.1779	-42.1807		-49.962	-49.0946	-51.8856
		-49.4818	-37.5314	-42.356		-49.9598	-49.1046	-51.9091
		-49.4927	-37.8733	-42.5286		-49.9565	-49.1137	-51.9327
		-49.504	-38.2036	-42.6986		-49.9518	-49.1217	-51.9562
		-49.5156	-38.5226	-42.8661		-49.9458	-49.1284	-51.9796
		-49.5277	-38.8307	-43.0308		-49.9384	-49.1338	-52.0028
		-49.5403	-39.1279	-43.1926		-49.9299	-49.1378	-52.0256
		-49.5533	-39.4147	-43.3512		-49.9204	-49.1405	-52.048
		-49.5668	-39.6914	-43.5064		-49.9102	-49.1418	-52.0699
		-49.5809	-39.9581	-43.6578		-49.8996	-49.1418	-52.091
		-49.5956	-40.2152	-43.8052		-49.8889	-49.1406	-52.1114
		-49.6108	-40.4628	-43.9485		-49.8782	-49.1382	-52.1306
		-49.6265	-40.7012	-44.0875		-49.868	-49.1347	-52.1486
		-49.6427	-40.9307	-44.2222		-49.8582	-49.13	-52.1649
		-49.6593	-41.1513	-44.3525		-49.8491	-49.1243	-52.1793
		-49.6763	-41.3634	-44.4786		-49.8406	-49.1176	-52.1914
		-49.6933	-41.5672	-44.6004		-49.8327	-49.1099	-52.2011
		-49.7105	-41.763	-44.7181		-49.8253	-49.1013	-52.2082
		-49.7274	-41.9509	-44.8317		-49.8182	-49.0918	-52.2126
		-49.7441	-42.1314	-44.9415		-49.8111	-49.0814	-52.2143
		-49.7603	-42.3047	-45.0475		-49.8038	-49.0704	-52.2136
		-49.776	-42.4713	-45.1499		-49.7961	-49.0587	-52.2109
		-49.791	-42.6314	-45.2488		-49.7878	-49.0465	-52.2066
		-49.8051	-42.7854	-45.3443		-49.7787	-49.034	-52.2013
		-49.8184	-42.9337	-45.4365		-49.7686	-49.0212	-52.196
		-49.8308	-43.0766	-45.5254		-49.7574	-49.0084	-52.1912
		-49.8423	-43.2145	-45.611		-49.7451	-48.9955	-52.1878
		-49.8528	-43.3477	-45.6933		-49.7317	-48.9827	-52.1866
		-49.8625	-43.4763	-45.7723		-49.7174	-48.97	-52.1881
		-49.8713	-43.6007	-45.8479		-49.7021	-48.9574	-52.1929
		-49.8794	-43.7211	-45.9201		-49.6861	-48.9449	-52.2013
		-49.8867	-43.8376	-45.9888		-49.6694	-48.9324	-52.2133
		-49.8935	-43.9505	-46.054		-49.6523	-48.92	-52.229
		-49.8998	-44.0598	-46.1157		-49.6349	-48.9075	-52.2479
		-49.9057	-44.1658	-46.1742		-49.6174	-48.895	-52.2696
		-49.9115	-44.2684	-46.2296		-49.5999	-48.8824	-52.2935
		-49.9171	-44.368	-46.2822		-49.5824	-48.87	-52.3189
		-49.9229	-44.4646	-46.3324		-49.5652	-48.8577	-52.345
		-49.9289	-44.5583	-46.3808		-49.5483	-48.8458	-52.371
		-49.9352	-44.6494	-46.4277		-49.5317	-48.8345	-52.3962
		-49.942	-44.7381	-46.4737		-49.5154	-48.8241	-52.42
		-49.9494	-44.8244	-46.5193		-49.4995	-48.8147	-52.4416
		-49.9574	-44.9085	-46.5649		-49.484	-48.8065	-52.4608
		-49.9661	-44.9905	-46.6108		-49.4687	-48.7998	-52.477
		-49.9755	-45.0705	-46.6572		-49.4536	-48.7945	-52.4902
		-49.9857	-45.1487	-46.7042		-49.4386	-48.7907	-52.5001
		-49.9964	-45.2248	-46.7518		-49.4235	-48.7882	-52.5066
		-50.0077	-45.2991	-46.7999		-49.4083	-48.7867	-52.5099
		-50.0193	-45.3713	-46.8483		-49.3927	-48.786	-52.5099
		-50.0311	-45.4414	-46.8968		-49.3766	-48.7855	-52.5067
		-50.0429	-45.5093	-46.9451		-49.3599	-48.785	-52.5004
		-50.0545	-45.5749	-46.9929		-49.3425	-48.7838	-52.4911
		-50.0656	-45.6381	-47.04		-49.3243	-48.7816	-52.479
		-50.0761	-45.699	-47.0863		-49.3053	-48.778	-52.4644
		-50.0858	-45.7576	-47.1316		-49.2854	-48.7727	-52.4474
		-50.0945	-45.8139	-47.176		-49.2647	-48.7655	-52.4284
		-50.1023	-45.868	-47.2192		-49.2433	-48.7561	-52.4078
		-50.1091	-45.9203	-47.2614		-49.2211	-48.7447	-52.3858
		-50.1147	-45.9708	-47.3024		-49.1982	-48.7313	-52.3629
		-50.1194	-46.0199	-47.3421		-49.1746	-48.716	-52.3396
		-50.1231	-46.0678	-47.3805		-49.1503	-48.6991	-52.3161
		-50.1258	-46.1149	-47.4174		-49.1254	-48.6807	-52.2928
		-50.1277	-46.1614	-47.4527		-49.0998	-48.6611	-52.2699
		-50.1289	-46.2074	-47.4863		-49.0735	-48.6406	-52.2475
		-50.1295	-46.2533	-47.5179		-49.0465	-48.6193	-52.2256
		-50.1295	-46.299	-47.5475		-49.0188	-48.5974	-52.2043
		-50.1292	-46.3446	-47.5751		-48.9904	-48.575	-52.1834
		-50.1286	-46.3899	-47.6009		-48.9612	-48.5522	-52.1627
		-50.1278	-46.4349	-47.625		-48.9314	-48.5291	-52.1422
		-50.1269	-46.4794	-47.6477		-48.9011	-48.5058	-52.1215
		-50.1261	-46.523	-47.6694		-48.8702	-48.4823	-52.1007
		-50.1254	-46.5655	-47.6907		-48.8388	-48.4586	-52.0796
		-50.1248	-46.6067	-47.712		-48.8071	-48.4349	-52.0583
		-50.1243	-46.6464	-47.7339		-48.775	-48.4113	-52.0366
		-50.1239	-46.6842	-47.7568		-48.7427	-48.3877	-52.0146
		-50.1235	-46.7203	-47.7812		-48.7101	-48.3642	-51.9925
		-50.1229	-46.7546	-47.8074		-48.6774	-48.341	-51.9702
		-50.1221	-46.7872	-47.8357		-48.6445	-48.3179	-51.9479
		-50.1208	-46.8184	-47.866		-48.6115	-48.295	-51.9256
		-50.1189	-46.8483	-47.8983		-48.5784	-48.2723	-51.9034
		-50.1162	-46.8773	-47.9323		-48.5453	-48.2496	-51.8813
		-50.1127	-46.9057	-47.9677		-48.5122	-48.2269	-51.8593
		-50.1083	-46.9338	-48.0041		-48.4792	-48.2041	-51.8373
		-50.1029	-46.9618	-48.041		-48.4463	-48.1811	-51.8154
		-50.0967	-46.9898	-48.0778		-48.4135	-48.1578	-51.7935
		-50.0897	-47.0179	-48.1141		-48.3809	-48.1342	-51.7715
		-50.0823	-47.0462	-48.1495		-48.3484	-48.1104	-51.7493
		-50.0747	-47.0744	-48.1838		-48.316	-48.0862	-51.7268
		-50.0671	-47.1024	-48.2168		-48.2835	-48.062	-51.704
		-50.06	-47.1301	-48.2483		-48.2509	-48.0376	-51.681
		-50.0536	-47.1571	-48.2786		-48.2181	-48.0133	-51.6576
		-50.0482	-47.1831	-48.3077		-48.1849	-47.9891	-51.6341
		-50.0442	-47.2081	-48.3361		-48.1513	-47.9652	-51.6104
		-50.0417	-47.2317	-48.3641		-48.1172	-47.9415	-51.5869
		-50.0407	-47.2539	-48.3921		-48.0826	-47.918	-51.5637
		-50.0415	-47.2746	-48.4205		-48.0475	-47.8948	-51.541
		-50.0438	-47.2938	-48.4499		-48.012	-47.8717	-51.5191
		-50.0476	-47.3115	-48.4804		-47.9761	-47.8484	-51.4982
		-50.0527	-47.3279	-48.5124		-47.9401	-47.8249	-51.4784
		-50.0588	-47.3431	-48.5461		-47.9041	-47.8008	-51.4599
		-50.0656	-47.3574	-48.5816		-47.8681	-47.776	-51.4426
		-50.0728	-47.3709	-48.6187		-47.8324	-47.7501	-51.4263
		-50.08	-47.3841	-48.6573		-47.7971	-47.7229	-51.4108
		-50.0869	-47.397	-48.6971		-47.7622	-47.6943	-51.3956
		-50.0933	-47.41	-48.7376		-47.7278	-47.664	-51.3803
		-50.0989	-47.4233	-48.7785		-47.694	-47.6321	-51.3643
		-50.1036	-47.437	-48.8191		-47.6607	-47.5986	-51.3472
		-50.1071	-47.4514	-48.8591		-47.6281	-47.5634	-51.3285
		-50.1096	-47.4663	-48.898		-47.596	-47.5268	-51.3079
		-50.111	-47.482	-48.9354		-47.5645	-47.4889	-51.2851
		-50.1112	-47.4982	-48.971		-47.5335	-47.4499	-51.2601
		-50.1106	-47.5149	-49.0047		-47.5029	-47.41	-51.2331
		-50.109	-47.5318	-49.0366		-47.4728	-47.3695	-51.2044
		-50.1068	-47.5488	-49.0665		-47.443	-47.3286	-51.1744
		-50.1038	-47.5655	-49.0948		-47.4135	-47.2876	-51.1437
		-50.1003	-47.5818	-49.1215		-47.3842	-47.2467	-51.1129
		-50.0963	-47.5973	-49.1469		-47.3549	-47.2061	-51.0827
		-50.0919	-47.6119	-49.171		-47.3255	-47.1659	-51.0536
		-50.087	-47.6255	-49.194		-47.2959	-47.1263	-51.0259
		-50.0817	-47.6379	-49.216		-47.2659	-47.0875	-51.0001
		-50.076	-47.6492	-49.2369		-47.2354	-47.0494	-50.9762
		-50.0699	-47.6595	-49.2568		-47.2045	-47.0121	-50.9542
		-50.0635	-47.669	-49.2755		-47.1729	-46.9756	-50.9339
		-50.057	-47.6778	-49.2932		-47.1406	-46.9398	-50.9152
		-50.0504	-47.6862	-49.3099		-47.1077	-46.9047	-50.8975
		-50.0439	-47.6946	-49.3256		-47.0743	-46.8699	-50.8805
		-50.0376	-47.7031	-49.3407		-47.0403	-46.8354	-50.8637
		-50.0319	-47.7121	-49.3553		-47.006	-46.8008	-50.8467
		-50.0267	-47.7217	-49.3699		-46.9713	-46.7659	-50.8292
		-50.0221	-47.7319	-49.3849		-46.9365	-46.7304	-50.8109
		-50.0183	-47.743	-49.4006		-46.9017	-46.6942	-50.7915
		-50.0152	-47.7548	-49.4173		-46.8669	-46.6571	-50.7709
		-50.0126	-47.7674	-49.4353		-46.8323	-46.619	-50.7489
		-50.0104	-47.7804	-49.4547		-46.7978	-46.5799	-50.7256
		-50.0084	-47.7937	-49.4754		-46.7635	-46.5401	-50.701
		-50.0063	-47.8072	-49.4973		-46.7293	-46.4998	-50.6749
		-50.0038	-47.8205	-49.52		-46.6952	-46.4592	-50.6475
		-50.0007	-47.8335	-49.5431		-46.6611	-46.4189	-50.6188
		-49.9968	-47.8459	-49.5662		-46.6268	-46.3793	-50.5888
		-49.992	-47.8577	-49.5887		-46.5924	-46.3407	-50.5576
		-49.9862	-47.8687	-49.61		-46.5577	-46.3035	-50.5252
		-49.9794	-47.879	-49.6299		-46.5226	-46.2682	-50.4917
		-49.9717	-47.8885	-49.6477		-46.4872	-46.2347	-50.4574
		-49.9634	-47.8974	-49.6633		-46.4513	-46.2033	-50.4224
		-49.9545	-47.9057	-49.6763		-46.4152	-46.1737	-50.3871
		-49.9453	-47.9137	-49.6867		-46.3788	-46.1458	-50.3517
		-49.936	-47.9214	-49.6944		-46.3424	-46.1193	-50.3165
		-49.9268	-47.929	-49.6992		-46.306	-46.0936	-50.282
		-49.9178	-47.9363	-49.7013		-46.2699	-46.0685	-50.2485
		-49.909	-47.9435	-49.7006		-46.2342	-46.0433	-50.2164
		-49.9003	-47.9502	-49.6969		-46.1991	-46.0176	-50.1857
		-49.8916	-47.9561	-49.6901		-46.1648	-45.9911	-50.1568
		-49.8823	-47.9607	-49.6795		-46.1314	-45.9635	-50.1296
		-49.8718	-47.9633	-49.6643		-46.099	-45.9346	-50.1041
		-49.8592	-47.9626	-49.643		-46.0677	-45.9045	-50.0802
		-49.8432	-47.9573	-49.6134		-46.0375	-45.8731	-50.0576
		-49.822	-47.9455	-49.5722		-46.0084	-45.8407	-50.0362
		-49.7935	-47.9249	-49.5153		-45.9804	-45.8075	-50.0156
		-49.7551	-47.8928	-49.4371		-45.9533	-45.774	-49.9958
		-49.7039	-47.8457	-49.3312		-45.927	-45.7405	-49.9766
		-49.6368	-47.7804	-49.1901		-45.9014	-45.7074	-49.9579
		-49.5507	-47.6934	-49.0061		-45.8763	-45.6749	-49.9397
		-49.4432	-47.5815	-48.7718		-45.8516	-45.6435	-49.9223
		-49.3131	-47.4428	-48.4818		-45.8271	-45.6132	-49.9057
		-49.1608	-47.2773	-48.1335		-45.8026	-45.5843	-49.8901
		-48.9895	-47.0872	-47.7295		-45.778	-45.5566	-49.8756
		-48.8058	-46.8786	-47.2789		-45.7531	-45.5302	-49.8625
		-48.6202	-46.6618	-46.7989		-45.7278	-45.5049	-49.8506
		-48.4477	-46.4518	-46.3163		-45.702	-45.4803	-49.8399
		-48.3077	-46.2687	-45.8677		-45.6758	-45.4562	-49.8303
		-48.2232	-46.1369	-45.4985		-45.6491	-45.4323	-49.8214
		-48.2203	-46.0843	-45.2614		-45.6219	-45.4082	-49.8129
		-48.3253	-46.1404	-45.2126		-45.5944	-45.3837	-49.8044
		-48.5635	-46.3336	-45.4072		-45.5667	-45.3585	-49.7954
		-48.9552	-46.6883	-45.8934		-45.5388	-45.3325	-49.7857
		-49.5135	-47.222	-46.7061		-45.511	-45.3056	-49.775
		-50.2411	-47.9415	-47.8608		-45.4832	-45.2778	-49.763
		-51.128	-48.8405	-49.3484		-45.4556	-45.2492	-49.7498
		-52.1504	-49.898	-51.1315		-45.4284	-45.22	-49.7352
		-53.2701	-51.0774	-53.1434		-45.4014	-45.1904	-49.7193
		-54.4363	-52.3281	-55.2902		-45.3747	-45.1606	-49.7024
		-55.588	-53.5875	-57.4553		-45.3484	-45.1309	-49.6845
		-56.6583	-54.7854	-59.5077		-45.3223	-45.1014	-49.6658
		-57.5798	-55.8496	-61.3118		-45.2965	-45.0724	-49.6463
		-58.2897	-56.711	-62.7392		-45.271	-45.044	-49.6263
		-58.736	-57.3107	-63.6802		-45.2458	-45.0163	-49.6057
		-58.8819	-57.6048	-64.0542		-45.2208	-44.9894	-49.5846
		-58.71	-57.5686	-63.8185		-45.1963	-44.9632	-49.5632
		-58.2239	-57.1998	-62.9726		-45.1721	-44.9377	-49.5416
		-57.4484	-56.5183	-61.5597		-45.1486	-44.9128	-49.52
		-56.4278	-55.5651	-59.6632		-45.1256	-44.8887	-49.4988
		-55.2217	-54.3985	-57.3999		-45.1033	-44.8651	-49.4784
		-53.9	-53.0892	-54.9096		-45.0817	-44.842	-49.4593
		-52.5374	-51.7141	-52.3437		-45.0607	-44.8194	-49.4418
		-51.207	-50.3498	-49.8518		-45.0402	-44.7972	-49.4264
		-49.9745	-49.0672	-47.5699		-45.0201	-44.7754	-49.4136
		-48.8941	-47.9253	-45.6104		-45.0001	-44.7538	-49.4035
		-48.0048	-46.9688	-44.0547		-44.9798	-44.7324	-49.3962
		-47.3291	-46.2251	-42.9494		-44.959	-44.7111	-49.3916
		-46.8733	-45.7047	-42.3056		-44.9374	-44.6898	-49.3894
		-46.6283	-45.402	-42.1022		-44.9147	-44.6685	-49.3891
		-46.5732	-45.2982	-42.2915		-44.8905	-44.647	-49.3902
		-46.6779	-45.3646	-42.806		-44.8648	-44.6255	-49.3919
		-46.9072	-45.5663	-43.5669		-44.8375	-44.6039	-49.3935
		-47.2242	-45.866	-44.492		-44.8086	-44.5822	-49.3945
		-47.5937	-46.227	-45.5026		-44.7781	-44.5605	-49.3941
		-47.9839	-46.6165	-46.529		-44.7464	-44.5389	-49.392
		-48.369	-47.0067	-47.5145		-44.7136	-44.5174	-49.3879
		-48.7291	-47.3762	-48.4169		-44.6801	-44.496	-49.3815
		-49.0509	-47.7101	-49.2088		-44.6463	-44.4749	-49.373
		-49.3268	-47.9994	-49.8765		-44.6126	-44.4539	-49.3625
		-49.5541	-48.2406	-50.4175		-44.5792	-44.4331	-49.3504
		-49.7343	-48.4342	-50.8385		-44.5466	-44.4123	-49.3369
		-49.8713	-48.5836	-51.1516		-44.515	-44.3916	-49.3226
		-49.9708	-48.6943	-51.3728		-44.4846	-44.3706	-49.308
		-50.0393	-48.7725	-51.5191		-44.4556	-44.3493	-49.2934
		-50.083	-48.8247	-51.6072		-44.428	-44.3277	-49.2795
		-50.1079	-48.8571	-51.6522		-44.4017	-44.3056	-49.2666
		-50.1192	-48.8749	-51.667		-44.3768	-44.2829	-49.2551
		-50.1211	-48.8828	-51.6621		-44.3529	-44.2596	-49.2454
		-50.117	-48.8845	-51.6458		-44.33	-44.2358	-49.2376
		-50.1093	-48.8827	-51.6239		-44.3076	-44.2114	-49.2319
		-50.0999	-48.8794	-51.6009		-44.2855	-44.1866	-49.2285
		-50.0898	-48.8762	-51.5794		-44.2634	-44.1615	-49.2274
		-50.0799	-48.8739	-51.5612		-44.241	-44.136	-49.2284
		-50.0705	-48.8731	-51.5472		-44.218	-44.1104	-49.2316
		-50.0619	-48.874	-51.5376		-44.1943	-44.0848	-49.2367
		-50.054	-48.8765	-51.5324		-44.1697	-44.0592	-49.2436
		-50.0468	-48.8807	-51.5313		-44.1443	-44.0339	-49.2519
		-50.04	-48.8862	-51.5337		-44.118	-44.0089	-49.2615
		-50.0337	-48.8928	-51.5393		-44.0911	-43.9844	-49.2721
		-50.0275	-48.9002	-51.5474		-44.0638	-43.9605	-49.2834
		-50.0215	-48.9082	-51.5576		-44.0363	-43.9375	-49.2951
		-50.0153	-48.9167	-51.5694		-44.0089	-43.9154	-49.307
		-50.0092	-48.9255	-51.5825		-43.9819	-43.8945	-49.3188
		-50.0029	-48.9344	-51.5966		-43.9555	-43.875	-49.3302
		-49.9966	-48.9435	-51.6115		-43.93	-43.857	-49.341
		-49.9905	-48.9527	-51.627		-43.9054	-43.8406	-49.3511
		-49.9847	-48.9621	-51.6431		-43.8818	-43.826	-49.36
		-49.9793	-48.9718	-51.6597		-43.8593	-43.8133	-49.3678
		-49.9746	-48.9818	-51.677		-43.8377	-43.8024	-49.3742
		-49.9706	-48.9921	-51.6948		-43.8171	-43.7934	-49.3792
		-49.9676	-49.0028	-51.7133		-43.7973	-43.7862	-49.3824
		-49.9654	-49.0138	-51.7325		-43.7783	-43.7806	-49.384
		-49.9641	-49.0253	-51.7525		-43.76	-43.7765	-49.3838
		-49.9635	-49.037	-51.7732		-43.7423	-43.7735	-49.3819
		-49.9634	-49.0489	-51.7946		-43.7252	-43.7713	-49.3783
		-49.9635	-49.0607	-51.8166		-43.7089	-43.7697	-49.3731
		-49.9635	-49.0725	-51.8392		-43.6933	-43.7682	-49.3665
		-49.9631	-49.0838	-51.8622		-43.6788	-43.7665	-49.3587
		-49.962	-49.0946	-51.8856		-43.6653	-43.7643	-49.35
		-49.9598	-49.1046	-51.9091		-43.653	-43.7613	-49.3407
		-49.9565	-49.1137	-51.9327		-43.6421	-43.7573	-49.3312
		-49.9518	-49.1217	-51.9562		-43.6327	-43.7523	-49.3217
		-49.9458	-49.1284	-51.9796		-43.6246	-43.7461	-49.3127
		-49.9384	-49.1338	-52.0028		-43.618	-43.7388	-49.3042
		-49.9299	-49.1378	-52.0256		-43.6125	-43.7306	-49.2965
		-49.9204	-49.1405	-52.048		-43.6082	-43.7215	-49.2896
		-49.9102	-49.1418	-52.0699		-43.6046	-43.7119	-49.2836
		-49.8996	-49.1418	-52.091		-43.6015	-43.702	-49.2784
		-49.8889	-49.1406	-52.1114		-43.5986	-43.692	-49.2738
		-49.8782	-49.1382	-52.1306		-43.5956	-43.682	-49.2696
		-49.868	-49.1347	-52.1486		-43.5922	-43.6722	-49.2656
		-49.8582	-49.13	-52.1649		-43.5883	-43.6626	-49.2617
		-49.8491	-49.1243	-52.1793		-43.5837	-43.6532	-49.2577
		-49.8406	-49.1176	-52.1914		-43.5783	-43.644	-49.2534
		-49.8327	-49.1099	-52.2011		-43.5721	-43.6348	-49.2489
		-49.8253	-49.1013	-52.2082		-43.5652	-43.6255	-49.244
		-49.8182	-49.0918	-52.2126		-43.5577	-43.6158	-49.239
		-49.8111	-49.0814	-52.2143		-43.5496	-43.6056	-49.234
		-49.8038	-49.0704	-52.2136		-43.5411	-43.5949	-49.2291
		-49.7961	-49.0587	-52.2109		-43.5324	-43.5835	-49.2247
		-49.7878	-49.0465	-52.2066		-43.5235	-43.5715	-49.221
		-49.7787	-49.034	-52.2013		-43.5144	-43.5589	-49.2182
		-49.7686	-49.0212	-52.196		-43.5052	-43.5459	-49.2167
		-49.7574	-49.0084	-52.1912		-43.4958	-43.5327	-49.2165
		-49.7451	-48.9955	-52.1878		-43.4861	-43.5196	-49.2178
		-49.7317	-48.9827	-52.1866		-43.4761	-43.5068	-49.2206
		-49.7174	-48.97	-52.1881		-43.4655	-43.4946	-49.2249
		-49.7021	-48.9574	-52.1929		-43.4542	-43.4833	-49.2305
		-49.6861	-48.9449	-52.2013		-43.4421	-43.4732	-49.2372
		-49.6694	-48.9324	-52.2133		-43.4292	-43.4645	-49.2446
		-49.6523	-48.92	-52.229		-43.4153	-43.4572	-49.2524
		-49.6349	-48.9075	-52.2479		-43.4005	-43.4515	-49.2602
		-49.6174	-48.895	-52.2696		-43.3849	-43.4475	-49.2679
		-49.5999	-48.8824	-52.2935		-43.3685	-43.4449	-49.2752
		-49.5824	-48.87	-52.3189		-43.3516	-43.4439	-49.2819
		-49.5652	-48.8577	-52.345		-43.3345	-43.444	-49.2881
		-49.5483	-48.8458	-52.371		-43.3172	-43.4452	-49.2939
		-49.5317	-48.8345	-52.3962		-43.3001	-43.4472	-49.2993
		-49.5154	-48.8241	-52.42		-43.2834	-43.4498	-49.3048
		-49.4995	-48.8147	-52.4416		-43.2671	-43.4526	-49.3105
		-49.484	-48.8065	-52.4608		-43.2515	-43.4556	-49.3167
		-49.4687	-48.7998	-52.477		-43.2366	-43.4586	-49.3236
		-49.4536	-48.7945	-52.4902		-43.2225	-43.4613	-49.3315
		-49.4386	-48.7907	-52.5001		-43.2092	-43.4638	-49.3404
		-49.4235	-48.7882	-52.5066		-43.1967	-43.466	-49.3503
		-49.4083	-48.7867	-52.5099		-43.185	-43.468	-49.3613
		-49.3927	-48.786	-52.5099		-43.1741	-43.4697	-49.3732
		-49.3766	-48.7855	-52.5067		-43.1639	-43.4713	-49.3858
		-49.3599	-48.785	-52.5004		-43.1545	-43.4729	-49.399
		-49.3425	-48.7838	-52.4911		-43.146	-43.4744	-49.4127
		-49.3243	-48.7816	-52.479		-43.1383	-43.4761	-49.4266
		-49.3053	-48.778	-52.4644		-43.1314	-43.478	-49.4408
		-49.2854	-48.7727	-52.4474		-43.1255	-43.4801	-49.455
		-49.2647	-48.7655	-52.4284		-43.1204	-43.4824	-49.4693
		-49.2433	-48.7561	-52.4078		-43.1161	-43.485	-49.4837
		-49.2211	-48.7447	-52.3858		-43.1125	-43.4879	-49.4982
		-49.1982	-48.7313	-52.3629		-43.1095	-43.491	-49.5127
		-49.1746	-48.716	-52.3396		-43.1069	-43.4944	-49.5274
		-49.1503	-48.6991	-52.3161		-43.1046	-43.4979	-49.5424
		-49.1254	-48.6807	-52.2928		-43.1023	-43.5017	-49.5575
		-49.0998	-48.6611	-52.2699		-43.0999	-43.5056	-49.5729
		-49.0735	-48.6406	-52.2475		-43.0972	-43.5095	-49.5885
		-49.0465	-48.6193	-52.2256		-43.0939	-43.5135	-49.6043
		-49.0188	-48.5974	-52.2043		-43.0901	-43.5173	-49.6201
		-48.9904	-48.575	-52.1834		-43.0855	-43.521	-49.6359
		-48.9612	-48.5522	-52.1627		-43.0802	-43.5244	-49.6515
		-48.9314	-48.5291	-52.1422		-43.0742	-43.5274	-49.6668
		-48.9011	-48.5058	-52.1215		-43.0674	-43.5298	-49.6816
		-48.8702	-48.4823	-52.1007		-43.06	-43.5315	-49.6957
		-48.8388	-48.4586	-52.0796		-43.0521	-43.5324	-49.7091
		-48.8071	-48.4349	-52.0583		-43.0438	-43.5324	-49.7215
		-48.775	-48.4113	-52.0366		-43.0353	-43.5313	-49.7331
		-48.7427	-48.3877	-52.0146		-43.0268	-43.5292	-49.7439
		-48.7101	-48.3642	-51.9925		-43.0185	-43.5259	-49.7539
		-48.6774	-48.341	-51.9702		-43.0105	-43.5216	-49.7632
		-48.6445	-48.3179	-51.9479		-43.0032	-43.5162	-49.7722
		-48.6115	-48.295	-51.9256		-42.9965	-43.51	-49.7808
		-48.5784	-48.2723	-51.9034		-42.9906	-43.5031	-49.7894
		-48.5453	-48.2496	-51.8813		-42.9857	-43.4957	-49.798
		-48.5122	-48.2269	-51.8593		-42.9818	-43.4882	-49.8067
		-48.4792	-48.2041	-51.8373		-42.9788	-43.4808	-49.8155
		-48.4463	-48.1811	-51.8154		-42.9767	-43.4739	-49.8244
		-48.4135	-48.1578	-51.7935		-42.9755	-43.4678	-49.8333
		-48.3809	-48.1342	-51.7715		-42.975	-43.4629	-49.8419
		-48.3484	-48.1104	-51.7493		-42.9751	-43.4593	-49.8504
		-48.316	-48.0862	-51.7268		-42.9756	-43.4574	-49.8585
		-48.2835	-48.062	-51.704		-42.9764	-43.4572	-49.8663
		-48.2509	-48.0376	-51.681		-42.9773	-43.4588	-49.8739
		-48.2181	-48.0133	-51.6576		-42.9782	-43.4622	-49.8813
		-48.1849	-47.9891	-51.6341		-42.979	-43.4671	-49.8888
		-48.1513	-47.9652	-51.6104		-42.9798	-43.4733	-49.8964
		-48.1172	-47.9415	-51.5869		-42.9805	-43.4805	-49.9045
		-48.0826	-47.918	-51.5637		-42.9812	-43.4883	-49.913
		-48.0475	-47.8948	-51.541		-42.982	-43.4964	-49.922
		-48.012	-47.8717	-51.5191		-42.9831	-43.5043	-49.9315
		-47.9761	-47.8484	-51.4982		-42.9845	-43.5116	-49.9411
		-47.9401	-47.8249	-51.4784		-42.9865	-43.518	-49.9506
		-47.9041	-47.8008	-51.4599		-42.9891	-43.5232	-49.9597
		-47.8681	-47.776	-51.4426		-42.9923	-43.5271	-49.9678
		-47.8324	-47.7501	-51.4263		-42.9963	-43.5294	-49.9747
		-47.7971	-47.7229	-51.4108		-43.0008	-43.5301	-49.98
		-47.7622	-47.6943	-51.3956		-43.0059	-43.5293	-49.9836
		-47.7278	-47.664	-51.3803		-43.0114	-43.5271	-49.9852
		-47.694	-47.6321	-51.3643		-43.0171	-43.5235	-49.9852
		-47.6607	-47.5986	-51.3472		-43.0229	-43.5188	-49.9836
		-47.6281	-47.5634	-51.3285		-43.0285	-43.5131	-49.9808
		-47.596	-47.5268	-51.3079		-43.0339	-43.5068	-49.9773
		-47.5645	-47.4889	-51.2851		-43.0388	-43.4999	-49.9736
		-47.5335	-47.4499	-51.2601		-43.0432	-43.4927	-49.97
		-47.5029	-47.41	-51.2331		-43.047	-43.4853	-49.9672
		-47.4728	-47.3695	-51.2044		-43.0501	-43.4781	-49.9654
		-47.443	-47.3286	-51.1744		-43.0525	-43.471	-49.9648
		-47.4135	-47.2876	-51.1437		-43.0544	-43.4643	-49.9658
		-47.3842	-47.2467	-51.1129		-43.0557	-43.458	-49.9683
		-47.3549	-47.2061	-51.0827		-43.0565	-43.4523	-49.9723
		-47.3255	-47.1659	-51.0536		-43.0569	-43.4472	-49.9778
		-47.2959	-47.1263	-51.0259		-43.0569	-43.4427	-49.9846
		-47.2659	-47.0875	-51.0001		-43.0566	-43.4388	-49.9923
		-47.2354	-47.0494	-50.9762		-43.056	-43.4354	-50.0009
		-47.2045	-47.0121	-50.9542		-43.0553	-43.4324	-50.01
		-47.1729	-46.9756	-50.9339		-43.0543	-43.4299	-50.0192
		-47.1406	-46.9398	-50.9152		-43.0531	-43.4274	-50.0283
		-47.1077	-46.9047	-50.8975		-43.0518	-43.425	-50.0369
		-47.0743	-46.8699	-50.8805		-43.0503	-43.4223	-50.0448
		-47.0403	-46.8354	-50.8637		-43.0488	-43.4192	-50.0517
		-47.006	-46.8008	-50.8467		-43.0472	-43.4155	-50.0574
		-46.9713	-46.7659	-50.8292		-43.0457	-43.411	-50.0619
		-46.9365	-46.7304	-50.8109		-43.0444	-43.4055	-50.0651
		-46.9017	-46.6942	-50.7915		-43.0433	-43.3991	-50.0671
		-46.8669	-46.6571	-50.7709		-43.0426	-43.3917	-50.0681
		-46.8323	-46.619	-50.7489		-43.0424	-43.3833	-50.0683
		-46.7978	-46.5799	-50.7256		-43.0427	-43.3741	-50.068
		-46.7635	-46.5401	-50.701		-43.0435	-43.3643	-50.0676
		-46.7293	-46.4998	-50.6749		-43.0449	-43.3542	-50.0672
		-46.6952	-46.4592	-50.6475		-43.0467	-43.3441	-50.0671
		-46.6611	-46.4189	-50.6188		-43.0489	-43.3343	-50.0674
		-46.6268	-46.3793	-50.5888		-43.0514	-43.3252	-50.0681
		-46.5924	-46.3407	-50.5576		-43.0541	-43.3172	-50.0691
		-46.5577	-46.3035	-50.5252		-43.0569	-43.3104	-50.0703
		-46.5226	-46.2682	-50.4917		-43.0596	-43.3051	-50.0713
		-46.4872	-46.2347	-50.4574		-43.0621	-43.3015	-50.0718
		-46.4513	-46.2033	-50.4224		-43.0644	-43.2995	-50.0715
		-46.4152	-46.1737	-50.3871		-43.0662	-43.2992	-50.0701
		-46.3788	-46.1458	-50.3517		-43.0674	-43.3004	-50.0675
		-46.3424	-46.1193	-50.3165		-43.0679	-43.3029	-50.0634
		-46.306	-46.0936	-50.282		-43.0674	-43.3063	-50.0578
		-46.2699	-46.0685	-50.2485		-43.0657	-43.3103	-50.0508
		-46.2342	-46.0433	-50.2164		-43.0626	-43.3143	-50.0423
		-46.1991	-46.0176	-50.1857		-43.0578	-43.318	-50.0324
		-46.1648	-45.9911	-50.1568		-43.0509	-43.3206	-50.021
		-46.1314	-45.9635	-50.1296		-43.0415	-43.3212	-50.0074
		-46.099	-45.9346	-50.1041		-43.0289	-43.3191	-49.9908
		-46.0677	-45.9045	-50.0802		-43.0124	-43.3129	-49.9696
		-46.0375	-45.8731	-50.0576		-42.9909	-43.3011	-49.9413
		-46.0084	-45.8407	-50.0362		-42.963	-43.2818	-49.9023
		-45.9804	-45.8075	-50.0156		-42.9269	-43.2527	-49.8479
		-45.9533	-45.774	-49.9958		-42.8804	-43.2109	-49.7719
		-45.927	-45.7405	-49.9766		-42.8209	-43.1531	-49.6673
		-45.9014	-45.7074	-49.9579		-42.7457	-43.0761	-49.5257
		-45.8763	-45.6749	-49.9397		-42.6521	-42.9763	-49.3386
		-45.8516	-45.6435	-49.9223		-42.5381	-42.851	-49.0981
		-45.8271	-45.6132	-49.9057		-42.4026	-42.6983	-48.7979
		-45.8026	-45.5843	-49.8901		-42.2463	-42.5183	-48.4351
		-45.778	-45.5566	-49.8756		-42.0726	-42.314	-48.0117
		-45.7531	-45.5302	-49.8625		-41.8881	-42.0915	-47.5368
		-45.7278	-45.5049	-49.8506		-41.7035	-41.8616	-47.0276
		-45.702	-45.4803	-49.8399		-41.5339	-41.6398	-46.5112
		-45.6758	-45.4562	-49.8303		-41.3987	-41.4466	-46.0247
		-45.6491	-45.4323	-49.8214		-41.3211	-41.3067	-45.6143
		-45.6219	-45.4082	-49.8129		-41.327	-41.2482	-45.3337
		-45.5944	-45.3837	-49.8044		-41.4429	-41.3009	-45.2403
		-45.5667	-45.3585	-49.7954		-41.6939	-41.4933	-45.3903
		-45.5388	-45.3325	-49.7857		-42.1002	-41.8498	-45.8334
		-45.511	-45.3056	-49.775		-42.6746	-42.3875	-46.6058
		-45.4832	-45.2778	-49.763		-43.4195	-43.113	-47.7242
		-45.4556	-45.2492	-49.7498		-44.3243	-44.0196	-49.1807
		-45.4284	-45.22	-49.7352		-45.3644	-45.0856	-50.9387
		-45.4014	-45.1904	-49.7193		-46.501	-46.274	-52.9322
		-45.3747	-45.1606	-49.7024		-47.6823	-47.5331	-55.0675
		-45.3484	-45.1309	-49.6845		-48.8465	-48.7997	-57.228
		-45.3223	-45.1014	-49.6658		-49.926	-50.003	-59.2824
		-45.2965	-45.0724	-49.6463		-50.8524	-51.0697	-61.0946
		-45.271	-45.044	-49.6263		-51.5625	-51.9304	-62.5351
		-45.2458	-45.0163	-49.6057		-52.0039	-52.5254	-63.4933
		-45.2208	-44.9894	-49.5846		-52.1399	-52.8106	-63.8877
		-45.1963	-44.9632	-49.5632		-51.9531	-52.7613	-63.6741
		-45.1721	-44.9377	-49.5416		-51.4478	-52.375	-62.8512
		-45.1486	-44.9128	-49.52		-50.6497	-51.6721	-61.461
		-45.1256	-44.8887	-49.4988		-49.6036	-50.694	-59.5861
		-45.1033	-44.8651	-49.4784		-48.3703	-49.4997	-57.3425
		-45.0817	-44.842	-49.4593		-47.021	-48.1606	-54.8696
		-45.0607	-44.8194	-49.4418		-45.6312	-46.7546	-52.3183
		-45.0402	-44.7972	-49.4264		-44.2751	-45.3592	-49.8379
		-45.0201	-44.7754	-49.4136		-43.0191	-44.0459	-47.5645
		-45.0001	-44.7538	-49.4035		-41.9181	-42.8749	-45.6104
		-44.9798	-44.7324	-49.3962		-41.0115	-41.8912	-44.0572
		-44.959	-44.7111	-49.3916		-40.322	-41.1229	-42.9516
		-44.9374	-44.6898	-49.3894		-39.8558	-40.5808	-42.3054
		-44.9147	-44.6685	-49.3891		-39.6039	-40.2596	-42.0977
		-44.8905	-44.647	-49.3902		-39.5449	-40.1407	-42.2813
		-44.8648	-44.6255	-49.3919		-39.6483	-40.1951	-42.7891
		-44.8375	-44.6039	-49.3935		-39.8785	-40.3878	-43.543
		-44.8086	-44.5822	-49.3945		-40.1982	-40.6812	-44.4608
		-44.7781	-44.5605	-49.3941		-40.5715	-41.0383	-45.4643
		-44.7464	-44.5389	-49.392		-40.9661	-41.4256	-46.4839
		-44.7136	-44.5174	-49.3879		-41.3557	-41.815	-47.4627
		-44.6801	-44.496	-49.3815		-41.7199	-42.1844	-48.3585
		-44.6463	-44.4749	-49.373		-42.045	-42.5183	-49.1436
		-44.6126	-44.4539	-49.3625		-42.3229	-42.8074	-49.804
		-44.5792	-44.4331	-49.3504		-42.5509	-43.0475	-50.3371
		-44.5466	-44.4123	-49.3369		-42.73	-43.2389	-50.749
		-44.515	-44.3916	-49.3226		-42.8641	-43.3847	-51.052
		-44.4846	-44.3706	-49.308		-42.9589	-43.4903	-51.2618
		-44.4556	-44.3493	-49.2934		-43.0207	-43.5619	-51.3955
		-44.428	-44.3277	-49.2795		-43.0562	-43.606	-51.47
		-44.4017	-44.3056	-49.2666		-43.0715	-43.6291	-51.5005
		-44.3768	-44.2829	-49.2551		-43.0719	-43.6366	-51.5003
		-44.3529	-44.2596	-49.2454		-43.062	-43.6335	-51.4803
		-44.33	-44.2358	-49.2376		-43.0454	-43.6236	-51.449
		-44.3076	-44.2114	-49.2319		-43.025	-43.6101	-51.4127
		-44.2855	-44.1866	-49.2285		-43.0028	-43.595	-51.3759
		-44.2634	-44.1615	-49.2274		-42.9802	-43.5801	-51.3418
		-44.241	-44.136	-49.2284		-42.9584	-43.5663	-51.312
		-44.218	-44.1104	-49.2316		-42.9378	-43.554	-51.2876
		-44.1943	-44.0848	-49.2367		-42.919	-43.5435	-51.2689
		-44.1697	-44.0592	-49.2436		-42.902	-43.5347	-51.2556
		-44.1443	-44.0339	-49.2519		-42.8869	-43.5273	-51.2473
		-44.118	-44.0089	-49.2615		-42.8737	-43.521	-51.2432
		-44.0911	-43.9844	-49.2721		-42.8624	-43.5155	-51.2426
		-44.0638	-43.9605	-49.2834		-42.8527	-43.5103	-51.2444
		-44.0363	-43.9375	-49.2951		-42.8447	-43.5051	-51.2478
		-44.0089	-43.9154	-49.307		-42.8382	-43.4996	-51.2521
		-43.9819	-43.8945	-49.3188		-42.833	-43.4936	-51.2563
		-43.9555	-43.875	-49.3302		-42.8289	-43.4871	-51.2601
		-43.93	-43.857	-49.341		-42.8259	-43.48	-51.263
		-43.9054	-43.8406	-49.3511		-42.8237	-43.4722	-51.2647
		-43.8818	-43.826	-49.36		-42.8221	-43.4639	-51.2652
		-43.8593	-43.8133	-49.3678		-42.821	-43.4552	-51.2647
		-43.8377	-43.8024	-49.3742		-42.82	-43.4462	-51.2634
		-43.8171	-43.7934	-49.3792		-42.8191	-43.437	-51.2617
		-43.7973	-43.7862	-49.3824		-42.8179	-43.4277	-51.26
		-43.7783	-43.7806	-49.384		-42.8163	-43.4186	-51.2588
		-43.76	-43.7765	-49.3838		-42.8139	-43.4098	-51.2586
		-43.7423	-43.7735	-49.3819		-42.8107	-43.4012	-51.2599
		-43.7252	-43.7713	-49.3783		-42.8065	-43.3931	-51.2628
		-43.7089	-43.7697	-49.3731		-42.8012	-43.3855	-51.2677
		-43.6933	-43.7682	-49.3665		-42.7946	-43.3783	-51.2746
		-43.6788	-43.7665	-49.3587		-42.7868	-43.3716	-51.2836
		-43.6653	-43.7643	-49.35		-42.7779	-43.3653	-51.2945
		-43.653	-43.7613	-49.3407		-42.7679	-43.3594	-51.3071
		-43.6421	-43.7573	-49.3312		-42.7571	-43.3537	-51.3211
		-43.6327	-43.7523	-49.3217		-42.7457	-43.3481	-51.3362
		-43.6246	-43.7461	-49.3127		-42.7339	-43.3425	-51.3522
		-43.618	-43.7388	-49.3042		-42.722	-43.3366	-51.3688
		-43.6125	-43.7306	-49.2965		-42.7103	-43.3304	-51.3858
		-43.6082	-43.7215	-49.2896		-42.6991	-43.3237	-51.403
		-43.6046	-43.7119	-49.2836		-42.6886	-43.3164	-51.4204
		-43.6015	-43.702	-49.2784		-42.6789	-43.3085	-51.4381
		-43.5986	-43.692	-49.2738		-42.6702	-43.2999	-51.4561
		-43.5956	-43.682	-49.2696		-42.6625	-43.2908	-51.4746
		-43.5922	-43.6722	-49.2656		-42.6557	-43.281	-51.4936
		-43.5883	-43.6626	-49.2617		-42.6497	-43.2708	-51.5133
		-43.5837	-43.6532	-49.2577		-42.6445	-43.2602	-51.5336
		-43.5783	-43.644	-49.2534		-42.6398	-43.2493	-51.5545
		-43.5721	-43.6348	-49.2489		-42.6356	-43.2383	-51.5758
		-43.5652	-43.6255	-49.244		-42.6317	-43.2273	-51.5972
		-43.5577	-43.6158	-49.239		-42.628	-43.2164	-51.6186
		-43.5496	-43.6056	-49.234		-42.6243	-43.2056	-51.6394
		-43.5411	-43.5949	-49.2291		-42.6206	-43.1951	-51.6594
		-43.5324	-43.5835	-49.2247		-42.6169	-43.1848	-51.6782
		-43.5235	-43.5715	-49.221		-42.6129	-43.1749	-51.6957
		-43.5144	-43.5589	-49.2182		-42.6088	-43.1654	-51.7115
		-43.5052	-43.5459	-49.2167		-42.6043	-43.1561	-51.7258
		-43.4958	-43.5327	-49.2165		-42.5995	-43.1472	-51.7386
		-43.4861	-43.5196	-49.2178		-42.5943	-43.1385	-51.7503
		-43.4761	-43.5068	-49.2206		-42.5885	-43.13	-51.761
		-43.4655	-43.4946	-49.2249		-42.5822	-43.1217	-51.7713
		-43.4542	-43.4833	-49.2305		-42.5753	-43.1135	-51.7816
		-43.4421	-43.4732	-49.2372		-42.5677	-43.1052	-51.7923
		-43.4292	-43.4645	-49.2446		-42.5596	-43.097	-51.8037
		-43.4153	-43.4572	-49.2524		-42.5509	-43.0885	-51.816
		-43.4005	-43.4515	-49.2602		-42.5417	-43.08	-51.8292
		-43.3849	-43.4475	-49.2679		-42.5321	-43.0712	-51.8434
		-43.3685	-43.4449	-49.2752		-42.522	-43.0622	-51.8581
		-43.3516	-43.4439	-49.2819		-42.5115	-43.0529	-51.8729
		-43.3345	-43.444	-49.2881		-42.5006	-43.0433	-51.8874
		-43.3172	-43.4452	-49.2939		-42.4893	-43.0334	-51.901
		-43.3001	-43.4472	-49.2993		-42.4774	-43.0233	-51.9132
		-43.2834	-43.4498	-49.3048		-42.465	-43.0128	-51.9233
		-43.2671	-43.4526	-49.3105		-42.4519	-43.0021	-51.9312
		-43.2515	-43.4556	-49.3167		-42.438	-42.9912	-51.9364
		-43.2366	-43.4586	-49.3236		-42.4233	-42.9801	-51.9391
		-43.2225	-43.4613	-49.3315		-42.4077	-42.9689	-51.9393
		-43.2092	-43.4638	-49.3404		-42.3912	-42.9579	-51.9373
		-43.1967	-43.466	-49.3503		-42.3739	-42.9471	-51.9336
		-43.185	-43.468	-49.3613		-42.3559	-42.9367	-51.9285
		-43.1741	-43.4697	-49.3732		-42.3372	-42.9269	-51.9225
		-43.1639	-43.4713	-49.3858		-42.318	-42.9178	-51.9162
		-43.1545	-43.4729	-49.399		-42.2985	-42.9096	-51.9098
		-43.146	-43.4744	-49.4127		-42.279	-42.9024	-51.9037
		-43.1383	-43.4761	-49.4266		-42.2596	-42.8962	-51.8978
		-43.1314	-43.478	-49.4408		-42.2404	-42.8911	-51.8924
		-43.1255	-43.4801	-49.455		-42.2216	-42.8869	-51.8872
		-43.1204	-43.4824	-49.4693		-42.2033	-42.8837	-51.8822
		-43.1161	-43.485	-49.4837		-42.1856	-42.8812	-51.8772
		-43.1125	-43.4879	-49.4982		-42.1684	-42.8793	-51.872
		-43.1095	-43.491	-49.5127		-42.1517	-42.8777	-51.8666
		-43.1069	-43.4944	-49.5274		-42.1354	-42.8763	-51.8609
		-43.1046	-43.4979	-49.5424		-42.1194	-42.8749	-51.8547
		-43.1023	-43.5017	-49.5575		-42.1034	-42.8733	-51.8481
		-43.0999	-43.5056	-49.5729		-42.0874	-42.8713	-51.841
		-43.0972	-43.5095	-49.5885		-42.0711	-42.8689	-51.8332
		-43.0939	-43.5135	-49.6043		-42.0543	-42.8659	-51.8246
		-43.0901	-43.5173	-49.6201		-42.0371	-42.8623	-51.8149
		-43.0855	-43.521	-49.6359		-42.0192	-42.8582	-51.8038
		-43.0802	-43.5244	-49.6515		-42.0007	-42.8536	-51.7909
		-43.0742	-43.5274	-49.6668		-41.9816	-42.8486	-51.7758
		-43.0674	-43.5298	-49.6816		-41.9618	-42.8433	-51.7582
		-43.06	-43.5315	-49.6957		-41.9415	-42.8378	-51.7379
		-43.0521	-43.5324	-49.7091		-41.9209	-42.8321	-51.7146
		-43.0438	-43.5324	-49.7215		-41.8999	-42.8262	-51.6884
		-43.0353	-43.5313	-49.7331		-41.8788	-42.8202	-51.6596
		-43.0268	-43.5292	-49.7439		-41.8577	-42.8141	-51.6284
		-43.0185	-43.5259	-49.7539		-41.8367	-42.8077	-51.5955
		-43.0105	-43.5216	-49.7632		-41.8159	-42.8009	-51.5615
		-43.0032	-43.5162	-49.7722		-41.7953	-42.7938	-51.5269
		-42.9965	-43.51	-49.7808		-41.7751	-42.786	-51.4926
		-42.9906	-43.5031	-49.7894		-41.7552	-42.7775	-51.4591
		-42.9857	-43.4957	-49.798		-41.7356	-42.7682	-51.4268
		-42.9818	-43.4882	-49.8067		-41.7163	-42.7579	-51.3961
		-42.9788	-43.4808	-49.8155		-41.6974	-42.7465	-51.3671
		-42.9767	-43.4739	-49.8244		-41.6788	-42.734	-51.3399
		-42.9755	-43.4678	-49.8333		-41.6604	-42.7204	-51.3143
		-42.975	-43.4629	-49.8419		-41.6423	-42.7055	-51.2901
		-42.9751	-43.4593	-49.8504		-41.6243	-42.6894	-51.2669
		-42.9756	-43.4574	-49.8585		-41.6065	-42.6721	-51.2446
		-42.9764	-43.4572	-49.8663		-41.5887	-42.6536	-51.2227
		-42.9773	-43.4588	-49.8739		-41.5707	-42.634	-51.2011
		-42.9782	-43.4622	-49.8813		-41.5526	-42.6134	-51.1796
		-42.979	-43.4671	-49.8888		-41.5341	-42.5919	-51.1582
		-42.9798	-43.4733	-49.8964		-41.515	-42.5697	-51.1368
		-42.9805	-43.4805	-49.9045		-41.4954	-42.547	-51.1156
		-42.9812	-43.4883	-49.913		-41.4749	-42.524	-51.0944
		-42.982	-43.4964	-49.922		-41.4536	-42.5009	-51.0735
		-42.9831	-43.5043	-49.9315		-41.4314	-42.4781	-51.0527
		-42.9845	-43.5116	-49.9411		-41.4083	-42.4556	-51.0319
		-42.9865	-43.518	-49.9506		-41.3842	-42.4338	-51.0111
		-42.9891	-43.5232	-49.9597		-41.3593	-42.4129	-50.99
		-42.9923	-43.5271	-49.9678		-41.3334	-42.3929	-50.9683
		-42.9963	-43.5294	-49.9747		-41.3069	-42.374	-50.9458
		-43.0008	-43.5301	-49.98		-41.2797	-42.3562	-50.9221
		-43.0059	-43.5293	-49.9836		-41.2519	-42.3393	-50.8969
		-43.0114	-43.5271	-49.9852		-41.2237	-42.3234	-50.87
		-43.0171	-43.5235	-49.9852		-41.1952	-42.3081	-50.8413
		-43.0229	-43.5188	-49.9836		-41.1665	-42.2932	-50.8106
		-43.0285	-43.5131	-49.9808		-41.1377	-42.2785	-50.778
		-43.0339	-43.5068	-49.9773		-41.1089	-42.2636	-50.7436
		-43.0388	-43.4999	-49.9736		-41.0803	-42.2483	-50.7076
		-43.0432	-43.4927	-49.97		-41.0521	-42.2323	-50.6702
		-43.047	-43.4853	-49.9672		-41.0244	-42.2153	-50.632
		-43.0501	-43.4781	-49.9654		-40.9973	-42.1973	-50.5933
		-43.0525	-43.471	-49.9648		-40.9711	-42.178	-50.5546
		-43.0544	-43.4643	-49.9658		-40.9457	-42.1574	-50.5163
		-43.0557	-43.458	-49.9683		-40.9213	-42.1355	-50.4789
		-43.0565	-43.4523	-49.9723		-40.8979	-42.1124	-50.4429
		-43.0569	-43.4472	-49.9778		-40.8755	-42.0881	-50.4085
		-43.0569	-43.4427	-49.9846		-40.8542	-42.0628	-50.3761
		-43.0566	-43.4388	-49.9923		-40.8337	-42.0367	-50.3458
		-43.056	-43.4354	-50.0009		-40.814	-42.0099	-50.3177
		-43.0553	-43.4324	-50.01		-40.7951	-41.9825	-50.2916
		-43.0543	-43.4299	-50.0192		-40.7768	-41.9548	-50.2674
		-43.0531	-43.4274	-50.0283		-40.7591	-41.9269	-50.2448
		-43.0518	-43.425	-50.0369		-40.742	-41.8989	-50.2235
		-43.0503	-43.4223	-50.0448		-40.7254	-41.871	-50.203
		-43.0488	-43.4192	-50.0517		-40.7094	-41.8431	-50.1829
		-43.0472	-43.4155	-50.0574		-40.6941	-41.8155	-50.1628
		-43.0457	-43.411	-50.0619		-40.6794	-41.788	-50.1424
		-43.0444	-43.4055	-50.0651		-40.6654	-41.7607	-50.1213
		-43.0433	-43.3991	-50.0671		-40.6522	-41.7335	-50.0995
		-43.0426	-43.3917	-50.0681		-40.6398	-41.7064	-50.0768
		-43.0424	-43.3833	-50.0683		-40.6282	-41.6793	-50.0532
		-43.0427	-43.3741	-50.068		-40.6173	-41.6522	-50.0288
		-43.0435	-43.3643	-50.0676		-40.607	-41.6251	-50.0039
		-43.0449	-43.3542	-50.0672		-40.5972	-41.598	-49.9785
		-43.0467	-43.3441	-50.0671		-40.5878	-41.5709	-49.953
		-43.0489	-43.3343	-50.0674		-40.5785	-41.5439	-49.9274
		-43.0514	-43.3252	-50.0681		-40.5692	-41.517	-49.902
		-43.0541	-43.3172	-50.0691		-40.5596	-41.4904	-49.8768
		-43.0569	-43.3104	-50.0703		-40.5496	-41.4642	-49.8517
		-43.0596	-43.3051	-50.0713		-40.5389	-41.4384	-49.8269
		-43.0621	-43.3015	-50.0718		-40.5272	-41.4132	-49.8022
		-43.0644	-43.2995	-50.0715		-40.5145	-41.3885	-49.7775
		-43.0662	-43.2992	-50.0701		-40.5005	-41.3645	-49.7526
		-43.0674	-43.3004	-50.0675		-40.4852	-41.3411	-49.7276
		-43.0679	-43.3029	-50.0634		-40.4685	-41.3183	-49.7023
		-43.0674	-43.3063	-50.0578		-40.4505	-41.296	-49.6768
		-43.0657	-43.3103	-50.0508		-40.4312	-41.2742	-49.651
		-43.0626	-43.3143	-50.0423		-40.4109	-41.2528	-49.625
		-43.0578	-43.318	-50.0324		-40.3897	-41.2317	-49.5988
		-43.0509	-43.3206	-50.021		-40.3679	-41.2108	-49.5725
		-43.0415	-43.3212	-50.0074		-40.3457	-41.1899	-49.5459
		-43.0289	-43.3191	-49.9908		-40.3235	-41.1692	-49.5191
		-43.0124	-43.3129	-49.9696		-40.3015	-41.1484	-49.4919
		-42.9909	-43.3011	-49.9413		-40.2798	-41.1274	-49.4642
		-42.963	-43.2818	-49.9023		-40.2587	-41.1063	-49.4357
		-42.9269	-43.2527	-49.8479		-40.2382	-41.0848	-49.4062
		-42.8804	-43.2109	-49.7719		-40.2183	-41.063	-49.3757
		-42.8209	-43.1531	-49.6673		-40.1989	-41.0407	-49.3441
		-42.7457	-43.0761	-49.5257		-40.1798	-41.0178	-49.3112
		-42.6521	-42.9763	-49.3386		-40.1609	-40.9942	-49.2773
		-42.5381	-42.851	-49.0981		-40.1418	-40.97	-49.2425
		-42.4026	-42.6983	-48.7979		-40.1225	-40.945	-49.2071
		-42.2463	-42.5183	-48.4351		-40.1025	-40.9193	-49.1715
		-42.0726	-42.314	-48.0117		-40.0819	-40.893	-49.136
		-41.8881	-42.0915	-47.5368		-40.0604	-40.8661	-49.1011
		-41.7035	-41.8616	-47.0276		-40.0381	-40.8388	-49.0672
		-41.5339	-41.6398	-46.5112		-40.0149	-40.8113	-49.0344
		-41.3987	-41.4466	-46.0247		-39.991	-40.7838	-49.0031
		-41.3211	-41.3067	-45.6143		-39.9666	-40.7565	-48.9733
		-41.327	-41.2482	-45.3337		-39.9418	-40.7296	-48.9449
		-41.4429	-41.3009	-45.2403		-39.917	-40.7034	-48.9179
		-41.6939	-41.4933	-45.3903		-39.8922	-40.678	-48.892
		-42.1002	-41.8498	-45.8334		-39.8678	-40.6537	-48.8669
		-42.6746	-42.3875	-46.6058		-39.8439	-40.6305	-48.8422
		-43.4195	-43.113	-47.7242		-39.8206	-40.6085	-48.8178
		-44.3243	-44.0196	-49.1807		-39.798	-40.588	-48.7934
		-45.3644	-45.0856	-50.9387		-39.776	-40.5689	-48.7687
		-46.501	-46.274	-52.9322		-39.7546	-40.5514	-48.7436
		-47.6823	-47.5331	-55.0675		-39.7335	-40.5354	-48.7182
		-48.8465	-48.7997	-57.228		-39.7126	-40.521	-48.6925
[truncated: 46,003 more rows]
