# Supplementary material for: Dendritic sodium spikes are required for long-term potentiation at distal synapses on hippocampal pyramidal neurons
Source: eLife. 2015 Aug 6;4:e06414. doi: 10.7554/eLife.06414 (PMC4576155; doi:10.7554/eLife.06414)
Supplement: Figure 6—source data 1. — DOI: http://dx.doi.org/10.7554/eLife.06414.023 [file elife06414s009.xlsx]

## Sheet: Figure 6
Panel A	sampling rate 50000Hz		Panel B		5-stim TBSx3+Current		5-stim TBSx3		5-stim TBSx3+SomaticVC		2-stim			Panel C		5-stim TBSx3+Current	5-stim TBSx3	5-stim TBSx3+SomaticVC	2-stim		Panel D	sampling rate 50000 Hz			Panel E		5-stim	2-stim
	-65.1977			time	Mean	SEM	Mean	SEM	Mean	SEM	Mean	SEM				1.21272	2.14507	1.95888	1.71603			5-stim TBS	2 stim TBS				9.99855	2.68375
	-65.1975			-9	0.948764	0.0371261	1.01713	0.0557486	0.933381	0.0164761	0.937607	0.0273472				1.3804	1.77766	1.31897	1.7512			-70.6723	-63.9125				10.1534	3.96398
	-65.1968			-8	0.955707	0.0228378	0.991779	0.0605762	0.959294	0.0332842	0.946389	0.0259269				1.534	1.68805	1.56208	1.64313			-70.6721	-63.9125				7.50723	1.01552
	-65.1957			-7	1.05838	0.0360924	1.05793	0.077435	0.989414	0.0208121	0.955016	0.0218688				1.51997	1.73208	1.24926	1.16787			-70.6712	-63.9719				12.5336	5.43237
	-65.1942			-6	0.98494	0.028194	0.94793	0.0207446	0.982894	0.0386671	0.976451	0.0178518				2.82908	1.38259	1.36988	1.30788			-70.6699	-63.9719				16.7316	5.66497
	-65.1924			-5	1.01664	0.0297877	0.943997	0.0200956	1.06101	0.0207874	1.03992	0.0309003				1.44194		1.48378	1.65184			-70.668	-63.9656					1.4146
	-65.1903			-4	0.968494	0.0231428	1.03586	0.0598479	1.03959	0.0163603	1.03948	0.0335051				1.54978		1.58531	1.39586			-70.6657	-63.9656					0.955886
	-65.1881			-3	1.04714	0.0353151	1.03516	0.0513115	1.03208	0.0407753	1.05153	0.0267434				1.41623		1.60641	1.7087			-70.663	-64.0062					1.51937
	-65.1858			-2	1.01994	0.0271185	0.970217	0.0218536	1.00234	0.035486	1.03577	0.0230663				1.74471		1.64439	1.19819			-70.6601	-64.0062					3.53693
	-65.1834			-1															1.48223			-70.657	-63.975					4.67287
	-65.181			0															1.41756			-70.6539	-63.975					3.4358
	-65.1787			1	1.45153	0.224964	1.78743	0.278596	1.35464	0.0816961	1.27507	0.0709625							1.48486			-70.6508	-63.9375					3.24892
	-65.1764			2	1.37132	0.147326	1.52651	0.126279	1.3007	0.0598597	1.26708	0.0481256							1.69199			-70.6479	-63.9375					2.98396
	-65.1742			3	1.43199	0.145454	1.67183	0.0875206	1.24214	0.057664	1.28076	0.053027										-70.6451	-63.9844
	-65.1721			4	1.35328	0.120347	1.66988	0.0777125	1.28748	0.100156	1.23559	0.0608005			Mean	1.62543	1.74509	1.531	1.50903			-70.6426	-63.9844			Mean	11.3849	3.11761
	-65.1702			5	1.33721	0.092361	1.53445	0.108499	1.27282	0.0752112	1.30624	0.064513			SEM	0.157938	0.102796	0.0705202	0.0559972			-70.6402	-64.0906			SEM	1.55534	0.522182
	-65.1684			6	1.41013	0.116442	1.68453	0.08628	1.35638	0.111003	1.26153	0.0485436										-70.6381	-64.0906
	-65.1667			7	1.4287	0.12869	1.71857	0.0901018	1.25354	0.0777426	1.24656	0.0363336										-70.6363	-64.0563
	-65.1652			8	1.63057	0.205298	1.71017	0.0720034	1.33521	0.0617683	1.18952	0.0577366										-70.6347	-64.0563
	-65.164			9	1.57255	0.228404	1.72538	0.110334	1.33062	0.0751592	1.25861	0.067749										-70.6333	-64.0187
	-65.163			10	1.59084	0.158715	1.71724	0.129803	1.35626	0.0836091	1.36188	0.0593661										-70.6323	-64.0187
	-65.1622			11	1.59127	0.158992	1.76579	0.148006	1.38931	0.0833773	1.30638	0.0511005										-70.6317	-64.025
	-65.1617			12	1.50332	0.148193	1.74579	0.128717	1.43018	0.0783664	1.29689	0.055132										-70.6315	-64.025
	-65.1613			13	1.56165	0.156489	1.63295	0.0985494	1.41248	0.0816447	1.36104	0.0566593										-70.6318	-64.05
	-65.161			14	1.52882	0.106714	1.698	0.0803494	1.5239	0.117107	1.36159	0.0489301										-70.6326	-64.05
	-65.1609			15	1.56453	0.128413	1.79678	0.150613	1.49393	0.0892277	1.32509	0.0626901										-70.6338	-64
	-65.1607			16	1.54696	0.0820474	1.73609	0.127733	1.45513	0.0714208	1.41406	0.0578329										-70.6355	-64
	-65.1604			17	1.57672	0.13597	1.7287	0.123898	1.47287	0.095215	1.40017	0.0643802										-70.6376	-64.0406
	-65.1599			18	1.54816	0.150651	1.6905	0.153083	1.4632	0.0671249	1.39183	0.0459205										-70.64	-64.0406
	-65.1593			19	1.63317	0.21582	1.67617	0.130977	1.46716	0.0585994	1.42203	0.069828										-70.6427	-64
	-65.1584			20	1.5851	0.133223	1.82121	0.209703	1.58014	0.101444	1.39257	0.0627122										-70.6455	-64
	-65.1573			21	1.62831	0.153345	1.82454	0.172796	1.49851	0.0508394	1.40738	0.0645297										-70.6482	-63.9969
	-65.1561			22	1.60205	0.131344	1.84625	0.162513	1.48232	0.0607846	1.46045	0.0634991										-70.6507	-63.9969
	-65.1549			23	1.51973	0.157149	1.74587	0.156057	1.47951	0.074296	1.50098	0.0676235										-70.6525	-63.9594
	-65.1538			24	1.67443	0.148051	1.75635	0.145504	1.45278	0.0825438	1.49468	0.0643174										-70.6536	-63.9594
	-65.153			25	1.57744	0.150894	1.75106	0.149251	1.50681	0.0910448	1.42432	0.0528409										-70.6537	-63.9719
	-65.1526			26	1.5453	0.112893	1.73539	0.1592	1.59921	0.0861547	1.47099	0.0671611										-70.6527	-63.9719
	-65.1527			27	1.59887	0.20266	1.7193	0.111965	1.52795	0.0770731	1.50185	0.0589266										-70.6503	-64.05
	-65.1534			28	1.63535	0.116447	1.76975	0.178768	1.50215	0.0764964	1.50608	0.0675455										-70.6468	-64.05
	-65.1547			29	1.67292	0.200959	1.72102	0.0681781	1.48689	0.0691737	1.51492	0.0715836										-70.6421	-64.0469
	-65.1564			30	1.6747	0.183526	1.77998	0.113146	1.53878	0.0851847	1.51255	0.0635065										-70.6365	-64.0469
	-65.1586																					-70.6305	-63.9625
	-65.1609																					-70.6243	-63.9625
	-65.1632																					-70.6183	-64.0031
	-65.1653																					-70.6131	-64.0031
	-65.1669																					-70.609	-64.1031
	-65.1681																					-70.6062	-64.1031
	-65.1686																					-70.6051	-64.0656
	-65.1684																					-70.6058	-64.0656
	-65.1677																					-70.6082	-63.9844
	-65.1663																					-70.6123	-63.9844
	-65.1644																					-70.6177	-63.9719
	-65.1621																					-70.6242	-63.9719
	-65.1594																					-70.6314	-64.0219
	-65.1564																					-70.639	-64.0219
	-65.153																					-70.6467	-64.0156
	-65.1493																					-70.6542	-64.0156
	-65.1452																					-70.6616	-63.9875
	-65.1407																					-70.6686	-63.9875
	-65.1358																					-70.6753	-63.9781
	-65.1306																					-70.6816	-63.9781
	-65.1251																					-70.6875	-64.1031
	-65.1196																					-70.6929	-64.1031
	-65.1143																					-70.6977	-64.0625
	-65.1093																					-70.7016	-64.0625
	-65.105																					-70.7046	-64.0406
	-65.1015																					-70.7065	-64.0406
	-65.099																					-70.7074	-64.0938
	-65.0976																					-70.7073	-64.0938
	-65.0972																					-70.7064	-64.0719
	-65.0979																					-70.705	-64.0719
	-65.0993																					-70.7033	-64.0312
	-65.1014																					-70.7015	-64.0312
	-65.1038																					-70.7	-63.9937
	-65.1065																					-70.6987	-63.9937
	-65.1092																					-70.6975	-64.0187
	-65.1117																					-70.6965	-64.0187
	-65.1141																					-70.6952	-63.95
	-65.1162																					-70.6934	-63.95
	-65.118																					-70.6909	-64.0375
	-65.1196																					-70.6873	-64.0375
	-65.121																					-70.6827	-63.9719
	-65.1221																					-70.6771	-63.9719
	-65.1231																					-70.6707	-63.95
	-65.1239																					-70.6639	-63.95
	-65.1245																					-70.6569	-63.9875
	-65.125																					-70.6503	-63.9875
	-65.1251																					-70.6443	-63.9156
	-65.1251																					-70.6391	-63.9156
	-65.1247																					-70.6349	-63.8719
	-65.1239																					-70.6319	-63.8719
	-65.1227																					-70.6299	-63.9125
	-65.121																					-70.6291	-63.9125
	-65.1189																					-70.6292	-63.9437
	-65.1162																					-70.6303	-63.9437
	-65.1131																					-70.6323	-63.9719
	-65.1095																					-70.6351	-63.9719
	-65.1056																					-70.6386	-63.9469
	-65.1015																					-70.6426	-63.9469
	-65.0974																					-70.6468	-64.0437
	-65.0932																					-70.6511	-64.0437
	-65.0893																					-70.6551	-63.9844
	-65.0855																					-70.6586	-63.9844
	-65.082																					-70.6613	-63.9937
	-65.0788																					-70.6632	-63.9937
	-65.0759																					-70.6641	-63.9781
	-65.0731																					-70.6641	-63.9781
	-65.0703																					-70.6634	-63.9531
	-65.0675																					-70.6619	-63.9531
	-65.0645																					-70.66	-64.0094
	-65.0614																					-70.6577	-64.0094
	-65.0582																					-70.6552	-63.9906
	-65.0548																					-70.6527	-63.9906
	-65.0515																					-70.6502	-64.025
	-65.0483																					-70.6479	-64.025
	-65.0455																					-70.6457	-63.95
	-65.0431																					-70.6438	-63.95
	-65.0414																					-70.642	-63.9594
	-65.0404																					-70.6404	-63.9594
	-65.0402																					-70.6391	-63.9562
	-65.0408																					-70.638	-63.9562
	-65.042																					-70.6372	-63.8812
	-65.0437																					-70.6367	-63.8812
	-65.0459																					-70.6365	-63.8281
	-65.0484																					-70.6366	-63.8281
	-65.051																					-70.6371	-63.875
	-65.0536																					-70.6377	-63.875
	-65.0561																					-70.6383	-63.85
	-65.0584																					-70.6387	-63.85
	-65.0604																					-70.6388	-63.9781
	-65.0623																					-70.6383	-63.9781
	-65.0638																					-70.6373	-63.9406
	-65.0651																					-70.6357	-63.9406
	-65.066																					-70.6338	-63.975
	-65.0667																					-70.6319	-63.975
	-65.0671																					-70.6302	-63.925
	-65.0672																					-70.6292	-63.925
	-65.067																					-70.6291	-63.85
	-65.0665																					-70.6301	-63.85
	-65.0658																					-70.6321	-63.925
	-65.0649																					-70.6352	-63.925
	-65.0639																					-70.6389	-64.0531
	-65.0627																					-70.6429	-64.0531
	-65.0614																					-70.6468	-63.9813
	-65.0601																					-70.6503	-63.9813
	-65.0587																					-70.653	-63.9813
	-65.0574																					-70.6549	-63.9813
	-65.0561																					-70.6559	-64
	-65.055																					-70.6562	-64
	-65.054																					-70.656	-64.0344
	-65.0531																					-70.6557	-64.0344
	-65.0526																					-70.6555	-64.0281
	-65.0523																					-70.6557	-64.0281
	-65.0523																					-70.6564	-63.9813
	-65.0525																					-70.6575	-63.9813
	-65.0529																					-70.6591	-64.0281
	-65.0534																					-70.6609	-64.0281
	-65.0538																					-70.6629	-64.0219
	-65.0539																					-70.6647	-64.0219
	-65.0536																					-70.6664	-63.9625
	-65.0526																					-70.6679	-63.9625
	-65.0508																					-70.669	-63.9688
	-65.0482																					-70.6699	-63.9688
	-65.0448																					-70.6706	-64
	-65.0405																					-70.6711	-64
	-65.0355																					-70.6714	-64.0594
	-65.03																					-70.6716	-64.0594
	-65.0241																					-70.6715	-64.1
	-65.0181																					-70.6713	-64.1
	-65.0121																					-70.6707	-64.0656
	-65.0064																					-70.6699	-64.0656
	-65.001																					-70.6689	-64.0125
	-64.9962																					-70.6677	-64.0125
	-64.992																					-70.6665	-64
	-64.9884																					-70.6653	-64
	-64.9856																					-70.6645	-63.8438
	-64.9835																					-70.664	-63.8438
	-64.9821																					-70.664	-63.8625
	-64.9815																					-70.6647	-63.8625
	-64.9815																					-70.6661	-63.9344
	-64.982																					-70.6681	-63.9344
	-64.9832																					-70.6707	-63.9062
	-64.9847																					-70.6739	-63.9062
	-64.9865																					-70.6773	-63.9062
	-64.9885																					-70.6809	-63.9062
	-64.9905																					-70.6845	-63.9062
	-64.9925																					-70.688	-63.9062
	-64.9944																					-70.6913	-63.9469
	-64.996																					-70.6943	-63.9469
	-64.9974																					-70.697	-63.925
	-64.9985																					-70.6994	-63.925
	-64.9993																					-70.7017	-63.875
	-64.9999																					-70.7039	-63.875
	-65.0004																					-70.7062	-63.8594
	-65.0008																					-70.7088	-63.8594
	-65.0012																					-70.7117	-63.95
	-65.0016																					-70.715	-63.95
	-65.0022																					-70.7186	-63.95
	-65.0027																					-70.7227	-63.95
	-65.0034																					-70.727	-63.9312
	-65.0041																					-70.7315	-63.9312
	-65.0048																					-70.7359	-64.0375
	-65.0055																					-70.7402	-64.0375
	-65.0061																					-70.744	-63.9375
	-65.0067																					-70.7473	-63.9375
	-65.0072																					-70.7499	-63.8969
	-65.0077																					-70.7517	-63.8969
	-65.0081																					-70.7526	-63.9437
	-65.0086																					-70.7527	-63.9437
	-65.0091																					-70.7519	-63.9594
	-65.0098																					-70.7504	-63.9594
	-65.0105																					-70.7483	-63.9094
	-65.0115																					-70.7455	-63.9094
	-65.0126																					-70.7423	-63.95
	-65.0139																					-70.7386	-63.95
	-65.0153																					-70.7346	-63.975
	-65.0169																					-70.7301	-63.975
	-65.0185																					-70.7254	-63.975
	-65.0202																					-70.7204	-63.975
	-65.0219																					-70.7152	-64
	-65.0234																					-70.7101	-64
	-65.0248																					-70.7051	-63.9531
	-65.0259																					-70.7004	-63.9531
	-65.0268																					-70.6962	-63.9813
	-65.0275																					-70.6925	-63.9813
	-65.0278																					-70.6894	-63.9031
	-65.0277																					-70.6871	-63.9031
	-65.0274																					-70.6855	-63.8844
	-65.0268																					-70.6849	-63.8844
	-65.0258																					-70.6852	-63.9937
	-65.0245																					-70.6865	-63.9937
	-65.0228																					-70.6888	-64
	-65.0206																					-70.6921	-64
	-65.018																					-70.6962	-63.9688
	-65.0149																					-70.7008	-63.9688
	-65.0113																					-70.7058	-64
	-65.0071																					-70.7107	-64
	-65.0024																					-70.7151	-63.9406
	-64.9974																					-70.7189	-63.9406
	-64.9921																					-70.7218	-63.9906
	-64.9867																					-70.7237	-63.9906
	-64.9815																					-70.7247	-64.0531
	-64.9766																					-70.7251	-64.0531
	-64.9722																					-70.7249	-64.0125
	-64.9687																					-70.7245	-64.0125
	-64.966																					-70.7241	-64.0219
	-64.9644																					-70.724	-64.0219
	-64.9638																					-70.7244	-64
	-64.9643																					-70.7254	-64
	-64.9658																					-70.7269	-63.9906
	-64.9683																					-70.7289	-63.9906
	-64.9715																					-70.7311	-63.9969
	-64.9753																					-70.7335	-63.9969
	-64.9795																					-70.7358	-63.9437
	-64.9841																					-70.7379	-63.9437
	-64.9889																					-70.7395	-63.9094
	-64.9937																					-70.7408	-63.9094
	-64.9985																					-70.7416	-63.9781
	-65.0031																					-70.7422	-63.9781
	-65.0076																					-70.7427	-64
	-65.0118																					-70.7432	-64
	-65.0156																					-70.7439	-63.9656
	-65.0191																					-70.7449	-63.9656
	-65.0222																					-70.7462	-63.9594
	-65.0249																					-70.7478	-63.9594
	-65.027																					-70.7497	-63.9344
	-65.0287																					-70.7518	-63.9344
	-65.0298																					-70.7541	-64
	-65.0304																					-70.7567	-64
	-65.0305																					-70.7595	-64.0281
	-65.03																					-70.7627	-64.0281
	-65.029																					-70.7662	-64.0187
	-65.0275																					-70.7701	-64.0187
	-65.0255																					-70.774	-64.0281
	-65.0231																					-70.7779	-64.0281
	-65.0202																					-70.7812	-63.9531
	-65.0169																					-70.7837	-63.9531
	-65.0134																					-70.7849	-63.9688
	-65.0096																					-70.7845	-63.9688
	-65.0058																					-70.7823	-63.9594
	-65.0021																					-70.7782	-63.9594
	-64.9985																					-70.7725	-64
	-64.9953																					-70.7654	-64
	-64.9924																					-70.7572	-63.975
	-64.9901																					-70.7486	-63.975
	-64.9883																					-70.7399	-63.9188
	-64.9871																					-70.7318	-63.9188
	-64.9865																					-70.7245	-64.0469
	-64.9863																					-70.7183	-64.0469
	-64.9865																					-70.7133	-64.05
	-64.987																					-70.7097	-64.05
	-64.9878																					-70.7074	-64.0969
	-64.9885																					-70.7062	-64.0969
	-64.9893																					-70.7061	-64.025
	-64.9898																					-70.7071	-64.025
	-64.9899																					-70.7091	-64.0375
	-64.9896																					-70.7121	-64.0375
	-64.9888																					-70.7161	-64
	-64.9874																					-70.721	-64
	-64.9854																					-70.7267	-63.9375
	-64.9828																					-70.733	-63.9375
	-64.9797																					-70.7395	-63.9594
	-64.9763																					-70.7458	-63.9594
	-64.9727																					-70.7516	-63.8875
	-64.969																					-70.7564	-63.8875
	-64.9655																					-70.76	-63.875
	-64.9623																					-70.7621	-63.875
	-64.9596																					-70.7629	-64.05
	-64.9575																					-70.7626	-64.05
	-64.9562																					-70.7613	-64.0563
	-64.9558																					-70.7597	-64.0563
	-64.9564																					-70.7579	-63.975
	-64.9581																					-70.7564	-63.975
	-64.9608																					-70.7553	-63.9656
	-64.9646																					-70.7546	-63.9656
	-64.9694																					-70.7543	-63.9688
	-64.9751																					-70.7542	-63.9688
	-64.9815																					-70.7543	-63.9875
	-64.9884																					-70.7544	-63.9875
	-64.9956																					-70.7543	-63.9969
	-65.0027																					-70.7541	-63.9969
	-65.0094																					-70.754	-63.9312
	-65.0155																					-70.7539	-63.9312
	-65.0209																					-70.7542	-64.0281
	-65.0252																					-70.755	-64.0281
	-65.0284																					-70.7563	-63.975
	-65.0306																					-70.7581	-63.975
	-65.0317																					-70.7605	-64.0156
	-65.0319																					-70.7631	-64.0156
	-65.0313																					-70.7657	-64.0156
	-65.0302																					-70.7682	-64.0156
	-65.0287																					-70.7703	-63.9688
	-65.027																					-70.7719	-63.9688
	-65.0254																					-70.7729	-63.9094
	-65.0241																					-70.7734	-63.9094
	-65.023																					-70.7734	-63.9125
	-65.0224																					-70.7731	-63.9125
	-65.0221																					-70.7725	-64.0281
	-65.0223																					-70.7718	-64.0281
	-65.0229																					-70.7711	-64.0125
	-65.0238																					-70.7704	-64.0125
	-65.0247																					-70.7697	-63.9875
	-65.0258																					-70.7691	-63.9875
	-65.0267																					-70.7684	-63.95
	-65.0274																					-70.7678	-63.95
	-65.0279																					-70.767	-63.9312
	-65.028																					-70.7664	-63.9312
	-65.0277																					-70.7658	-63.8594
	-65.027																					-70.7654	-63.8594
	-65.026																					-70.7654	-63.8969
	-65.0246																					-70.7658	-63.8969
	-65.023																					-70.7667	-63.9719
	-65.0212																					-70.7682	-63.9719
	-65.0193																					-70.7701	-64.0156
	-65.0172																					-70.7725	-64.0156
	-65.0152																					-70.7753	-63.9875
	-65.013																					-70.7783	-63.9875
	-65.0109																					-70.7813	-64.0312
	-65.0087																					-70.7844	-64.0312
	-65.0066																					-70.7873	-64.0656
	-65.0045																					-70.7901	-64.0656
	-65.0024																					-70.7926	-63.9875
	-65.0004																					-70.7948	-63.9875
	-64.9985																					-70.7966	-63.95
	-64.9967																					-70.7979	-63.95
	-64.995																					-70.7987	-63.9219
	-64.9936																					-70.799	-63.9219
	-64.9923																					-70.7986	-63.9844
	-64.9912																					-70.7977	-63.9844
	-64.9903																					-70.7962	-64
	-64.9897																					-70.7941	-64
	-64.9892																					-70.7916	-64
	-64.989																					-70.7888	-64
	-64.9889																					-70.7856	-64.0062
	-64.9889																					-70.782	-64.0062
	-64.989																					-70.7781	-63.9625
	-64.9892																					-70.774	-63.9625
	-64.9893																					-70.7695	-63.95
	-64.9895																					-70.7647	-63.95
	-64.9898																					-70.7596	-63.9781
	-64.9901																					-70.7542	-63.9781
	-64.9905																					-70.7486	-64.0469
	-64.9912																					-70.7428	-64.0469
	-64.9921																					-70.7368	-63.9906
	-64.9934																					-70.7309	-63.9906
	-64.995																					-70.7251	-64.0469
	-64.997																					-70.7196	-64.0469
	-64.9994																					-70.7147	-64.1312
	-65.002																					-70.7107	-64.1312
	-65.0046																					-70.7078	-64.05
	-65.0071																					-70.7063	-64.05
	-65.0092																					-70.7063	-64
	-65.0107																					-70.7081	-64
	-65.0115																					-70.7116	-63.9781
	-65.0113																					-70.7168	-63.9781
	-65.0101																					-70.7235	-64.0531
	-65.0078																					-70.7315	-64.0531
	-65.0046																					-70.7403	-64.0437
	-65.0006																					-70.7497	-64.0437
	-64.9959																					-70.7593	-64.0312
	-64.9908																					-70.7686	-64.0312
	-64.9854																					-70.7774	-64
	-64.9801																					-70.7855	-64
	-64.9751																					-70.7925	-64.0844
	-64.9704																					-70.7983	-64.0844
	-64.9663																					-70.8027	-64.1062
	-64.9628																					-70.8058	-64.1062
	-64.96																					-70.8073	-64.1
	-64.9578																					-70.8074	-64.1
	-64.9563																					-70.806	-64.05
	-64.9553																					-70.8033	-64.05
	-64.9548																					-70.7995	-64.0594
	-64.9546																					-70.7946	-64.0594
	-64.9548																					-70.7891	-64.0812
	-64.9551																					-70.7833	-64.0812
	-64.9555																					-70.7774	-64.0156
	-64.9559																					-70.7719	-64.0156
	-64.9563																					-70.7671	-63.9844
	-64.9566																					-70.7632	-63.9844
	-64.9568																					-70.7605	-64.075
	-64.9571																					-70.759	-64.075
	-64.9575																					-70.7588	-64.0125
	-64.9579																					-70.7601	-64.0125
	-64.9586																					-70.7626	-64.0781
	-64.9595																					-70.7663	-64.0781
	-64.9608																					-70.7709	-64.0719
	-64.9622																					-70.7761	-64.0719
	-64.9639																					-70.7818	-64.05
	-64.9658																					-70.7873	-64.05
	-64.9676																					-70.7923	-64.0781
	-64.9693																					-70.7964	-64.0781
	-64.9708																					-70.7991	-64.05
	-64.972																					-70.8001	-64.05
	-64.9727																					-70.7992	-64.0844
	-64.973																					-70.7964	-64.0844
	-64.9729																					-70.7917	-64.1188
	-64.9725																					-70.7854	-64.1188
	-64.9719																					-70.7778	-64.1469
	-64.9713																					-70.7695	-64.1469
	-64.9708																					-70.7608	-64.1031
	-64.9706																					-70.7524	-64.1031
	-64.9708																					-70.7446	-64.1
	-64.9715																					-70.7379	-64.1
	-64.9727																					-70.7325	-64.1031
	-64.9745																					-70.7286	-64.1031
	-64.9767																					-70.7263	-64.0812
	-64.9792																					-70.7256	-64.0812
	-64.9819																					-70.7263	-64.0906
	-64.9846																					-70.7281	-64.0906
	-64.9871																					-70.7308	-64.15
	-64.9891																					-70.734	-64.15
	-64.9904																					-70.7372	-64.1375
	-64.9909																					-70.74	-64.1375
	-64.9904																					-70.7423	-64.0687
	-64.9889																					-70.7437	-64.0687
	-64.9864																					-70.7442	-64.0344
	-64.9829																					-70.7437	-64.0344
	-64.9786																					-70.7425	-64.0219
	-64.9739																					-70.7406	-64.0219
	-64.9688																					-70.7385	-64
	-64.9639																					-70.7364	-64
	-64.9593																					-70.7345	-64.0563
	-64.9553																					-70.733	-64.0563
	-64.9522																					-70.732	-64.0312
	-64.95																					-70.7317	-64.0312
	-64.949																					-70.7318	-63.975
	-64.9491																					-70.7324	-63.975
	-64.9503																					-70.7333	-63.9875
	-64.9525																					-70.7345	-63.9875
	-64.9556																					-70.736	-63.9781
	-64.9596																					-70.7378	-63.9781
	-64.9642																					-70.74	-64.0156
	-64.9694																					-70.7426	-64.0156
	-64.975																					-70.7457	-63.9906
	-64.9811																					-70.7494	-63.9906
	-64.9877																					-70.7536	-63.95
	-64.9949																					-70.7583	-63.95
	-65.003																					-70.7636	-63.9469
	-65.0125																					-70.7697	-63.9469
	-65.0239																					-70.7771	-63.9344
	-65.0381																					-70.7867	-63.9344
	-65.0558																					-70.8003	-63.9625
	-65.0777																					-70.8206	-63.9625
	-65.1042																					-70.851	-63.9906
	-65.1354																					-70.8962	-63.9906
	-65.1705																					-70.9615	-64.0437
	-65.2079																					-71.0524	-64.0437
	-65.2449																					-71.1738	-64.0219
	-65.2778																					-71.329	-64.0219
	-65.3021																					-71.5188	-64.0312
	-65.3123																					-71.7397	-64.0312
	-65.303																					-71.9841	-63.9656
	-65.2693																					-72.2389	-63.9656
	-65.207																					-72.487	-63.9531
	-65.1141																					-72.7074	-63.9531
	-64.9904																					-72.8778	-64.0312
	-64.8388																					-72.9769	-64.0312
	-64.6647																					-72.9866	-64.9938
	-64.4758																					-72.8948	-64.9938
	-64.2823																					-72.6972	-64.5
	-64.0952																					-72.3987	-64.5
	-63.9259																					-72.0133	-64.0781
	-63.785																					-71.5632	-64.0781
	-63.6814																					-71.0768	-63.175
	-63.621																					-70.586	-63.175
	-63.6071																					-70.1227	-63.1688
	-63.639																					-69.7162	-63.1688
	-63.7132																					-69.39	-63.1844
	-63.823																					-69.1599	-63.1844
	-63.9598																					-69.033	-63.4344
	-64.1139																					-69.0077	-63.4344
	-64.2749																					-69.0745	-63.6187
	-64.4335																					-69.2179	-63.6187
	-64.5815																					-69.4183	-63.9
	-64.7125																					-69.6544	-63.9
	-64.8224																					-69.9056	-64.0875
	-64.9093																					-70.1535	-64.0875
	-64.973																					-70.3832	-63.9562
	-65.0151																					-70.5843	-63.9562
	-65.0383																					-70.7506	-63.875
	-65.0458																					-70.8801	-63.875
	-65.0414																					-70.9737	-64
	-65.0284																					-71.0351	-64
	-65.01																					-71.0691	-63.9969
	-64.9886																					-71.0814	-63.9969
	-64.9664																					-71.0775	-63.975
	-64.9446																					-71.0623	-63.975
	-64.9243																					-71.04	-63.9937
	-64.9059																					-71.014	-63.9937
	-64.8898																					-70.9869	-64.0812
	-64.8761																					-70.9603	-64.0812
	-64.8647																					-70.9355	-64.1
	-64.8555																					-70.9133	-64.1
	-64.8482																					-70.8941	-64.0375
	-64.8428																					-70.8779	-64.0375
	-64.8389																					-70.8648	-64.0187
	-64.8365																					-70.8546	-64.0187
	-64.8352																					-70.8469	-64.0437
	-64.835																					-70.8414	-64.0437
	-64.8356																					-70.8376	-64.0219
	-64.837																					-70.835	-64.0219
	-64.8389																					-70.8332	-64.05
	-64.8414																					-70.8319	-64.05
	-64.8443																					-70.8307	-64.0375
	-64.8474																					-70.8296	-64.0375
	-64.8508																					-70.8285	-64.05
	-64.8544																					-70.8275	-64.05
	-64.8579																					-70.8266	-64.0281
	-64.8614																					-70.8259	-64.0281
	-64.8647																					-70.8254	-64.0281
	-64.8678																					-70.8249	-64.0281
	-64.8707																					-70.8243	-64
	-64.8733																					-70.8232	-64
	-64.8757																					-70.8214	-64.0062
	-64.878																					-70.8187	-64.0062
	-64.8801																					-70.815	-64.0875
	-64.8822																					-70.8102	-64.0875
	-64.8842																					-70.8046	-64.0531
	-64.8861																					-70.7985	-64.0531
	-64.8879																					-70.7924	-63.9937
	-64.8896																					-70.7866	-63.9937
	-64.8912																					-70.7815	-63.9937
	-64.8925																					-70.7774	-63.9937
	-64.8935																					-70.7743	-64.0687
	-64.8943																					-70.7721	-64.0687
	-64.8948																					-70.7706	-64.05
	-64.8951																					-70.7695	-64.05
	-64.8952																					-70.7685	-64.0812
	-64.8951																					-70.7674	-64.0812
	-64.8948																					-70.7661	-64.0687
	-64.8944																					-70.7645	-64.0687
	-64.8939																					-70.7627	-64.0531
	-64.8932																					-70.7608	-64.0531
	-64.8923																					-70.7589	-63.9813
	-64.8911																					-70.7573	-63.9813
	-64.8898																					-70.7559	-63.9781
	-64.8882																					-70.7549	-63.9781
	-64.8864																					-70.754	-64.025
	-64.8846																					-70.7533	-64.025
	-64.8827																					-70.7527	-63.9688
	-64.881																					-70.752	-63.9688
	-64.8795																					-70.7511	-63.9688
	-64.8784																					-70.75	-63.9688
	-64.8777																					-70.7487	-64.0406
	-64.8775																					-70.7472	-64.0406
	-64.8778																					-70.7454	-63.9937
	-64.8785																					-70.7436	-63.9937
	-64.8796																					-70.7416	-64.1
	-64.881																					-70.7398	-64.1
	-64.8823																					-70.7381	-63.9969
	-64.8835																					-70.7367	-63.9969
	-64.8844																					-70.7358	-63.9562
	-64.8848																					-70.7353	-63.9562
	-64.8846																					-70.7354	-63.9875
	-64.8838																					-70.7362	-63.9875
	-64.8823																					-70.7375	-64.0187
	-64.8803																					-70.7395	-64.0187
	-64.8779																					-70.7421	-64.0281
	-64.8751																					-70.7451	-64.0281
	-64.8721																					-70.7487	-64.0062
	-64.8691																					-70.7525	-64.0062
	-64.8661																					-70.7565	-63.9531
	-64.8633																					-70.7606	-63.9531
	-64.8607																					-70.7646	-64.0344
	-64.8584																					-70.7683	-64.0344
	-64.8564																					-70.7717	-64.0844
	-64.8548																					-70.7747	-64.0844
	-64.8534																					-70.7771	-64.05
	-64.8524																					-70.779	-64.05
	-64.8517																					-70.7804	-63.9125
	-64.8514																					-70.7814	-63.9125
	-64.8514																					-70.7819	-63.9656
	-64.8517																					-70.7822	-63.9656
	-64.8523																					-70.7823	-64.0156
	-64.8531																					-70.7822	-64.0156
	-64.854																					-70.7819	-64.0312
	-64.8549																					-70.7815	-64.0312
	-64.8558																					-70.7809	-63.9094
	-64.8566																					-70.7802	-63.9094
	-64.8573																					-70.7794	-63.9062
	-64.8579																					-70.7786	-63.9062
	-64.8585																					-70.7778	-63.8094
	-64.8593																					-70.7771	-63.8094
	-64.8602																					-70.7764	-63.9219
	-64.8616																					-70.7759	-63.9219
	-64.8635																					-70.7756	-63.9656
	-64.8659																					-70.7752	-63.9656
	-64.869																					-70.7749	-63.9188
	-64.8726																					-70.7744	-63.9188
	-64.8767																					-70.7735	-63.9406
	-64.8811																					-70.7723	-63.9406
	-64.8856																					-70.7706	-63.9
	-64.89																					-70.7684	-63.9
	-64.8941																					-70.7658	-63.9469
	-64.8976																					-70.7629	-63.9469
	-64.9005																					-70.76	-63.8781
	-64.9027																					-70.7571	-63.8781
	-64.9039																					-70.7544	-63.875
	-64.9043																					-70.752	-63.875
	-64.9038																					-70.75	-63.8438
	-64.9025																					-70.7484	-63.8438
	-64.9004																					-70.747	-63.8875
	-64.8977																					-70.7458	-63.8875
	-64.8943																					-70.7447	-63.8563
	-64.8906																					-70.7436	-63.8563
	-64.8866																					-70.7424	-63.8687
	-64.8825																					-70.7409	-63.8687
	-64.8784																					-70.739	-63.8563
	-64.8746																					-70.7367	-63.8563
	-64.8712																					-70.7339	-63.8
	-64.8682																					-70.7304	-63.8
	-64.8658																					-70.7264	-63.7969
	-64.8638																					-70.722	-63.7969
	-64.8623																					-70.7172	-63.7281
	-64.8612																					-70.7123	-63.7281
	-64.8602																					-70.7076	-63.75
	-64.8592																					-70.7034	-63.75
	-64.858																					-70.6999	-63.85
	-64.8564																					-70.6972	-63.85
	-64.8544																					-70.6955	-63.8
	-64.8519																					-70.6946	-63.8
	-64.8488																					-70.6947	-63.7844
	-64.8453																					-70.6954	-63.7844
	-64.8414																					-70.6967	-63.7375
	-64.8371																					-70.6984	-63.7375
	-64.8326																					-70.7004	-63.75
	-64.828																					-70.7025	-63.75
	-64.8233																					-70.7046	-63.7
	-64.8184																					-70.7067	-63.7
	-64.8135																					-70.7086	-63.8187
	-64.8085																					-70.7103	-63.8187
	-64.8034																					-70.7118	-63.775
	-64.7981																					-70.7129	-63.775
	-64.7928																					-70.7135	-63.7781
	-64.7874																					-70.7136	-63.7781
	-64.7819																					-70.7129	-63.7562
	-64.7765																					-70.7114	-63.7562
	-64.7711																					-70.7092	-63.75
	-64.7657																					-70.706	-63.75
	-64.7605																					-70.702	-63.6906
	-64.7555																					-70.6972	-63.6906
	-64.7505																					-70.6916	-63.6844
	-64.7458																					-70.6854	-63.6844
	-64.7412																					-70.6786	-63.5594
	-64.7369																					-70.6714	-63.5594
	-64.7328																					-70.664	-63.6063
	-64.7289																					-70.6566	-63.6063
	-64.7253																					-70.6495	-63.65
	-64.7219																					-70.6427	-63.65
	-64.7188																					-70.6366	-63.65
	-64.7158																					-70.6313	-63.65
	-64.713																					-70.6269	-63.7031
	-64.7103																					-70.6232	-63.7031
	-64.7076																					-70.6202	-63.6656
	-64.7048																					-70.6177	-63.6656
	-64.7017																					-70.6155	-63.5844
	-64.6984																					-70.6134	-63.5844
	-64.6946																					-70.6113	-63.5719
	-64.6903																					-70.609	-63.5719
	-64.6853																					-70.6066	-63.575
	-64.6797																					-70.6041	-63.575
	-64.6735																					-70.6017	-63.6219
	-64.6667																					-70.5993	-63.6219
	-64.6594																					-70.5971	-63.6375
	-64.6517																					-70.5953	-63.6375
	-64.6437																					-70.5938	-63.6594
	-64.6357																					-70.5928	-63.6594
	-64.6278																					-70.5922	-63.6344
	-64.6201																					-70.592	-63.6344
	-64.6126																					-70.592	-63.6187
	-64.6056																					-70.5922	-63.6187
	-64.5988																					-70.5923	-63.6156
	-64.5923																					-70.5921	-63.6156
	-64.5859																					-70.5916	-63.5406
	-64.5796																					-70.5904	-63.5406
	-64.5732																					-70.5883	-63.4937
	-64.5665																					-70.5853	-63.4937
	-64.5594																					-70.5813	-63.5312
	-64.552																					-70.5762	-63.5312
	-64.5441																					-70.5701	-63.5219
	-64.5358																					-70.5634	-63.5219
	-64.5272																					-70.5562	-63.5187
	-64.5183																					-70.5489	-63.5187
	-64.5094																					-70.542	-63.55
	-64.5004																					-70.5358	-63.55
	-64.4916																					-70.5305	-63.5156
	-64.4831																					-70.5262	-63.5156
	-64.4749																					-70.5229	-63.4062
	-64.467																					-70.5202	-63.4062
	-64.4595																					-70.5177	-63.4
	-64.4523																					-70.515	-63.4
	-64.4453																					-70.5117	-63.4344
	-64.4383																					-70.5072	-63.4344
	-64.4311																					-70.5015	-63.4719
	-64.4236																					-70.4945	-63.4719
	-64.4156																					-70.4863	-63.4625
	-64.407																					-70.4774	-63.4625
	-64.3977																					-70.4682	-63.475
	-64.3876																					-70.4594	-63.475
	-64.3769																					-70.4515	-63.4937
	-64.3655																					-70.4451	-63.4937
	-64.3536																					-70.4407	-63.4125
	-64.3411																					-70.4386	-63.4125
	-64.3282																					-70.439	-63.4
	-64.315																					-70.4417	-63.4
	-64.3015																					-70.4465	-63.4
	-64.2878																					-70.4531	-63.4
	-64.2738																					-70.4608	-63.3719
	-64.2598																					-70.469	-63.3719
	-64.2457																					-70.477	-63.3969
	-64.2315																					-70.4841	-63.3969
	-64.2176																					-70.4898	-63.2781
	-64.2039																					-70.4936	-63.2781
	-64.1907																					-70.4952	-63.2719
	-64.178																					-70.4946	-63.2719
	-64.1661																					-70.4919	-63.2313
	-64.1551																					-70.4874	-63.2313
	-64.1449																					-70.4816	-63.1969
	-64.1357																					-70.4748	-63.1969
	-64.1274																					-70.4675	-63.0812
	-64.1199																					-70.46	-63.0812
	-64.1132																					-70.4524	-63.0781
	-64.1072																					-70.445	-63.0781
	-64.1017																					-70.4377	-63.1094
	-64.0965																					-70.4306	-63.1094
	-64.0916																					-70.4235	-63.0844
	-64.0867																					-70.4165	-63.0844
	-64.0816																					-70.4095	-63.1656
	-64.0764																					-70.4026	-63.1656
	-64.0706																					-70.396	-63.15
	-64.0644																					-70.3897	-63.15
	-64.0574																					-70.3839	-63.1187
	-64.0497																					-70.3787	-63.1187
	-64.0413																					-70.3742	-63.0938
	-64.0321																					-70.3701	-63.0938
	-64.0222																					-70.3664	-63
	-64.0118																					-70.3628	-63
	-64.0011																					-70.3591	-63.0625
	-63.9902																					-70.3549	-63.0625
	-63.9794																					-70.3501	-63.1
	-63.9687																					-70.3447	-63.1
	-63.9583																					-70.3386	-63.0312
	-63.9485																					-70.332	-63.0312
	-63.9391																					-70.325	-63
	-63.9303																					-70.318	-63
	-63.922																					-70.3111	-63.0094
	-63.9143																					-70.3045	-63.0094
	-63.907																					-70.2983	-62.9719
	-63.9002																					-70.2924	-62.9719
	-63.8936																					-70.2868	-62.9875
	-63.8872																					-70.2814	-62.9875
	-63.8809																					-70.276	-62.9656
	-63.8746																					-70.2707	-62.9656
	-63.8681																					-70.2654	-62.9344
	-63.8614																					-70.2602	-62.9344
	-63.8544																					-70.2553	-62.9219
	-63.8471																					-70.2508	-62.9219
	-63.8394																					-70.2469	-62.8344
	-63.8313																					-70.2439	-62.8344
	-63.823																					-70.2417	-62.9469
	-63.8143																					-70.2403	-62.9469
	-63.8053																					-70.2398	-62.8656
	-63.7962																					-70.2398	-62.8656
	-63.7867																					-70.2401	-62.9375
	-63.777																					-70.2405	-62.9375
	-63.7669																					-70.2406	-62.9469
	-63.7564																					-70.2402	-62.9469
	-63.7453																					-70.239	-62.9125
	-63.7335																					-70.237	-62.9125
	-63.7211																					-70.234	-62.975
	-63.7077																					-70.23	-62.975
	-63.6935																					-70.2251	-62.8844
	-63.6784																					-70.2193	-62.8844
	-63.6625																					-70.2128	-62.8594
	-63.6457																					-70.2057	-62.8594
	-63.6282																					-70.1983	-62.7125
	-63.6101																					-70.1907	-62.7125
	-63.5916																					-70.1832	-62.6781
	-63.5729																					-70.1759	-62.6781
	-63.5541																					-70.1692	-62.7437
	-63.5356																					-70.1631	-62.7437
	-63.5174																					-70.1578	-62.7437
	-63.4998																					-70.1532	-62.7437
	-63.4831																					-70.1494	-62.6875
	-63.4672																					-70.1462	-62.6875
	-63.4524																					-70.1435	-62.7188
	-63.4386																					-70.1411	-62.7188
	-63.4258																					-70.1387	-62.7
	-63.4139																					-70.1361	-62.7
	-63.4027																					-70.1331	-62.7781
	-63.3919																					-70.1293	-62.7781
	-63.3815																					-70.1246	-62.7375
	-63.371																					-70.1187	-62.7375
	-63.3604																					-70.1114	-62.7094
	-63.3494																					-70.1026	-62.7094
	-63.3379																					-70.0924	-62.7094
	-63.3259																					-70.0807	-62.7094
	-63.3135																					-70.0679	-62.6594
	-63.3006																					-70.0541	-62.6594
	-63.2875																					-70.0397	-62.7125
	-63.2743																					-70.0249	-62.7125
	-63.2612																					-70.0102	-62.6812
	-63.2485																					-69.9958	-62.6812
	-63.2363																					-69.9819	-62.6531
	-63.2247																					-69.9688	-62.6531
	-63.214																					-69.9566	-62.7125
	-63.204																					-69.9453	-62.7125
	-63.195																					-69.935	-62.7281
	-63.1867																					-69.9257	-62.7281
	-63.1791																					-69.9174	-62.65
	-63.172																					-69.9103	-62.65
	-63.1653																					-69.9044	-62.6125
	-63.1587																					-69.8998	-62.6125
	-63.152																					-69.8965	-62.5625
	-63.1449																					-69.8945	-62.5625
	-63.1374																					-69.8938	-62.45
	-63.1292																					-69.8939	-62.45
	-63.1202																					-69.8946	-62.4656
	-63.1103																					-69.8953	-62.4656
	-63.0996																					-69.8955	-62.5062
	-63.0881																					-69.8947	-62.5062
	-63.0759																					-69.8926	-62.5906
	-63.0631																					-69.8889	-62.5906
	-63.0501																					-69.8835	-62.55
	-63.0369																					-69.8767	-62.55
	-63.0238																					-69.8687	-62.5312
	-63.011																					-69.8597	-62.5312
	-62.9986																					-69.8503	-62.5219
	-62.9867																					-69.8409	-62.5219
	-62.9754																					-69.8317	-62.4688
	-62.9647																					-69.8229	-62.4688
	-62.9545																					-69.8148	-62.4906
	-62.9447																					-69.8071	-62.4906
	-62.9354																					-69.7999	-62.45
	-62.9263																					-69.793	-62.45
	-62.9173																					-69.7862	-62.475
	-62.9085																					-69.7794	-62.475
	-62.8996																					-69.7725	-62.5406
	-62.8907																					-69.7657	-62.5406
	-62.8817																					-69.7589	-62.3906
	-62.8726																					-69.7523	-62.3906
	-62.8632																					-69.746	-62.3875
	-62.8536																					-69.7403	-62.3875
	-62.8438																					-69.735	-62.3812
	-62.8337																					-69.7303	-62.3812
	-62.8233																					-69.726	-62.3438
	-62.8126																					-69.7218	-62.3438
	-62.8018																					-69.7178	-62.2656
	-62.7907																					-69.7135	-62.2656
	-62.7795																					-69.7089	-62.2625
	-62.7684																					-69.7037	-62.2625
	-62.7573																					-69.6979	-62.2437
	-62.7464																					-69.6915	-62.2437
	-62.7358																					-69.6845	-62.2469
	-62.7254																					-69.677	-62.2469
	-62.7154																					-69.6691	-62.1969
	-62.7057																					-69.6609	-62.1969
	-62.6962																					-69.6526	-62.2938
	-62.687																					-69.6442	-62.2938
	-62.6779																					-69.636	-62.1844
	-62.6688																					-69.628	-62.1844
	-62.6597																					-69.6202	-62.1688
	-62.6503																					-69.6129	-62.1688
	-62.6407																					-69.606	-62.2313
	-62.6308																					-69.5996	-62.2313
	-62.6205																					-69.5938	-62.1156
	-62.6098																					-69.5886	-62.1156
	-62.5987																					-69.584	-62.1406
	-62.5872																					-69.5798	-62.1406
	-62.5753																					-69.5761	-62.0844
	-62.5631																					-69.5726	-62.0844
	-62.5507																					-69.5693	-62.0344
	-62.5379																					-69.5659	-62.0344
	-62.5248																					-69.5623	-62.1094
	-62.5115																					-69.5583	-62.1094
	-62.4979																					-69.5538	-62.0687
	-62.4839																					-69.5488	-62.0687
	-62.4697																					-69.5435	-61.9562
	-62.4553																					-69.5379	-61.9562
	-62.4406																					-69.5322	-61.9625
	-62.4259																					-69.5266	-61.9625
	-62.4113																					-69.5213	-61.9344
	-62.3968																					-69.5162	-61.9344
	-62.3828																					-69.5114	-61.9156
	-62.3693																					-69.5067	-61.9156
	-62.3566																					-69.5018	-61.85
	-62.3446																					-69.4965	-61.85
	-62.3335																					-69.4906	-61.8125
	-62.3232																					-69.4839	-61.8125
	-62.3136																					-69.4764	-61.8781
	-62.3047																					-69.4681	-61.8781
	-62.2963																					-69.4592	-61.8844
	-62.2883																					-69.4501	-61.8844
	-62.2805																					-69.4409	-61.8812
	-62.2729																					-69.4321	-61.8812
	-62.2653																					-69.424	-61.8438
	-62.2579																					-69.4167	-61.8438
	-62.2504																					-69.4105	-61.8531
	-62.2431																					-69.4054	-61.8531
	-62.2359																					-69.4015	-61.8156
	-62.2288																					-69.3988	-61.8156
	-62.2217																					-69.3972	-61.75
	-62.2148																					-69.3964	-61.75
	-62.2078																					-69.3962	-61.75
	-62.2008																					-69.3964	-61.75
	-62.1935																					-69.3967	-61.7781
	-62.1858																					-69.3968	-61.7781
	-62.1777																					-69.3964	-61.7875
	-62.169																					-69.3954	-61.7875
	-62.1595																					-69.3936	-61.7031
	-62.1493																					-69.3909	-61.7031
	-62.1383																					-69.3872	-61.6625
	-62.1265																					-69.3826	-61.6625
	-62.1139																					-69.3771	-61.6344
	-62.1007																					-69.3708	-61.6344
	-62.0871																					-69.3639	-61.6719
	-62.0732																					-69.3564	-61.6719
	-62.0591																					-69.3486	-61.6125
	-62.0453																					-69.3407	-61.6125
	-62.0318																					-69.3331	-61.6875
	-62.0189																					-69.326	-61.6875
	-62.0068																					-69.3197	-61.6375
	-61.9956																					-69.3143	-61.6375
	-61.9855																					-69.31	-61.6063
	-61.9765																					-69.3066	-61.6063
	-61.9686																					-69.3041	-61.625
	-61.9618																					-69.3022	-61.625
	-61.956																					-69.3005	-61.55
	-61.9511																					-69.299	-61.55
	-61.9468																					-69.2973	-61.5594
	-61.9431																					-69.2952	-61.5594
	-61.9397																					-69.2929	-61.5656
	-61.9365																					-69.2901	-61.5656
	-61.9332																					-69.2869	-61.6156
	-61.9299																					-69.2833	-61.6156
	-61.9264																					-69.2793	-61.5719
	-61.923																					-69.2751	-61.5719
	-61.9201																					-69.2708	-61.5781
	-61.918																					-69.267	-61.5781
	-61.9176																					-69.2644	-61.575
	-61.9196																					-69.2646	-61.575
	-61.9249																					-69.2697	-61.5875
	-61.9342																					-69.2828	-61.5875
	-61.9481																					-69.3077	-61.5187
	-61.9667																					-69.3495	-61.5187
	-61.9891																					-69.4136	-61.5094
	-62.0138																					-69.5054	-61.5094
	-62.0381																					-69.6295	-61.5375
	-62.0583																					-69.7889	-61.5375
	-62.0696																					-69.9832	-61.5406
	-62.0668																					-70.2085	-61.5406
	-62.0445																					-70.4559	-61.55
	-61.9975																					-70.7116	-61.55
	-61.9219																					-70.9576	-61.5312
	-61.8157																					-71.1729	-61.5312
	-61.679																					-71.3351	-61.5219
	-61.5146																					-71.4233	-61.5219
	-61.3282																					-71.4201	-62.3406
	-61.1279																					-71.3143	-62.3406
	-60.9239																					-71.1026	-61.9469
	-60.7273																					-70.7907	-61.9469
	-60.5498																					-70.3933	-61.5469
	-60.4018																					-69.9331	-61.5469
	-60.2923																					-69.4387	-60.6469
	-60.2271																					-68.942	-60.6469
	-60.209																					-68.4751	-60.5125
	-60.2373																					-68.0669	-60.5125
	-60.308																					-67.7406	-60.6
	-60.4143																					-67.5117	-60.6
	-60.5472																					-67.3867	-60.6594
	-60.6965																					-67.3635	-60.6594
	-60.8521																					-67.432	-60.85
	-61.0041																					-67.5761	-60.85
	-61.1444																					-67.7758	-61.1625
	-61.2667																					-68.0094	-61.1625
	-61.3668																					-68.2562	-61.3406
	-61.4429																					-68.4979	-61.3406
	-61.495																					-68.7197	-61.3375
	-61.5249																					-68.9118	-61.3375
	-61.5354																					-69.0684	-61.25
	-61.5302																					-69.1879	-61.25
	-61.5132																					-69.272	-61.225
	-61.4881																					-69.3245	-61.225
	-61.4582																					-69.3506	-61.1656
	-61.4263																					-69.3558	-61.1656
	-61.3944																					-69.3457	-61.2094
	-61.364																					-69.3249	-61.2094
	-61.3361																					-69.2977	-61.2094
	-61.311																					-69.2671	-61.2094
	-61.2888																					-69.2356	-61.1969
	-61.2695																					-69.2049	-61.1969
	-61.2528																					-69.1762	-61.1688
	-61.2385																					-69.1501	-61.1688
	-61.2261																					-69.1269	-61.2062
	-61.2155																					-69.1067	-61.2062
	-61.2063																					-69.0892	-61.2281
	-61.1983																					-69.0741	-61.2281
	-61.1914																					-69.0609	-61.25
	-61.1854																					-69.0491	-61.25
	-61.1801																					-69.0383	-61.1469
	-61.1754																					-69.0279	-61.1469
	-61.1713																					-69.0177	-61.1531
	-61.1676																					-69.0076	-61.1531
	-61.1644																					-68.9974	-61.1812
	-61.1617																					-68.9873	-61.1812
	-61.1593																					-68.9774	-61.2281
	-61.1574																					-68.9679	-61.2281
	-61.1559																					-68.9592	-61.1375
	-61.1547																					-68.9514	-61.1375
	-61.1539																					-68.9446	-61.15
	-61.1534																					-68.9389	-61.15
	-61.1531																					-68.934	-61.1688
	-61.1528																					-68.9299	-61.1688
	-61.1525																					-68.9261	-61.1937
	-61.152																					-68.9222	-61.1937
	-61.1512																					-68.918	-61.3
	-61.1501																					-68.9131	-61.3
	-61.1486																					-68.9077	-61.2437
	-61.1468																					-68.9016	-61.2437
	-61.1445																					-68.8953	-61.1688
	-61.1419																					-68.889	-61.1688
	-61.1389																					-68.8833	-61.0125
	-61.1356																					-68.8782	-61.0125
	-61.1317																					-68.8742	-61.0875
	-61.1275																					-68.871	-61.0875
	-61.1227																					-68.8686	-61.1312
	-61.1174																					-68.8665	-61.1312
	-61.1116																					-68.8642	-61.1063
	-61.1054																					-68.8612	-61.1063
	-61.0987																					-68.8571	-61.0125
	-61.0917																					-68.8516	-61.0125
	-61.0844																					-68.8445	-60.9969
	-61.0771																					-68.8358	-60.9969
	-61.0697																					-68.826	-61.0344
	-61.0624																					-68.8152	-61.0344
	-61.0553																					-68.8039	-61.0375
	-61.0482																					-68.7927	-61.0375
	-61.0412																					-68.782	-61.0312
	-61.0342																					-68.772	-61.0312
	-61.027																					-68.763	-61.1031
	-61.0197																					-68.7549	-61.1031
	-61.012																					-68.7478	-61.1156
	-61.0039																					-68.7413	-61.1156
	-60.9953																					-68.7354	-60.9437
	-60.9863																					-68.7297	-60.9437
	-60.9768																					-68.7239	-60.9125
	-60.967																					-68.7178	-60.9125
	-60.9569																					-68.7114	-60.9
	-60.9467																					-68.7046	-60.9
	-60.9364																					-68.6973	-60.95
	-60.9262																					-68.6898	-60.95
	-60.9163																					-68.6822	-60.9813
	-60.9067																					-68.6745	-60.9813
	-60.8975																					-68.667	-61.0187
	-60.8888																					-68.6597	-61.0187
	-60.8806																					-68.6528	-61.0125
	-60.873																					-68.6463	-61.0125
	-60.8657																					-68.6401	-60.9625
	-60.8588																					-68.6343	-60.9625
	-60.8522																					-68.6288	-60.9813
	-60.8458																					-68.6233	-60.9813
	-60.8394																					-68.6179	-61.0187
	-60.833																					-68.6123	-61.0187
	-60.8264																					-68.6064	-60.9
	-60.8196																					-68.6001	-60.9
	-60.8126																					-68.5934	-60.9062
	-60.8052																					-68.5862	-60.9062
	-60.7975																					-68.5785	-60.9188
	-60.7894																					-68.5705	-60.9188
	-60.781																					-68.5622	-60.7969
	-60.7722																					-68.5538	-60.7969
	-60.763																					-68.5454	-60.8406
	-60.7536																					-68.5371	-60.8406
	-60.7438																					-68.5292	-60.8125
	-60.7338																					-68.5215	-60.8125
	-60.7237																					-68.5141	-60.7812
	-60.7136																					-68.507	-60.7812
	-60.7036																					-68.5002	-60.8875
	-60.6939																					-68.4934	-60.8875
	-60.6845																					-68.4866	-60.7437
	-60.6755																					-68.4797	-60.7437
	-60.667																					-68.4726	-60.7156
	-60.6591																					-68.4651	-60.7156
	-60.6516																					-68.4574	-60.6812
	-60.6445																					-68.4494	-60.6812
	-60.6377																					-68.4413	-60.6625
	-60.6309																					-68.4335	-60.6625
	-60.6241																					-68.4263	-60.7313
	-60.6171																					-68.42	-60.7313
	-60.6098																					-68.4151	-60.7687
	-60.6022																					-68.4117	-60.7687
	-60.5942																					-68.4102	-60.6781
	-60.5861																					-68.4104	-60.6781
	-60.5779																					-68.4123	-60.6281
	-60.5697																					-68.4155	-60.6281
	-60.5617																					-68.4194	-60.6094
	-60.554																					-68.4234	-60.6094
	-60.5468																					-68.4269	-60.5812
	-60.5401																					-68.4293	-60.5812
	-60.5338																					-68.4302	-60.5219
	-60.5279																					-68.4292	-60.5219
	-60.5223																					-68.4263	-60.5406
	-60.5169																					-68.4214	-60.5406
	-60.5116																					-68.4148	-60.5375
	-60.5062																					-68.4066	-60.5375
	-60.5007																					-68.3972	-60.5594
	-60.4949																					-68.387	-60.5594
	-60.4889																					-68.3763	-60.6125
	-60.4824																					-68.3655	-60.6125
	-60.4756																					-68.3548	-60.5344
	-60.4685																					-68.3445	-60.5344
	-60.4609																					-68.3348	-60.5344
	-60.4529																					-68.3259	-60.5344
	-60.4446																					-68.3177	-60.4781
	-60.4359																					-68.3102	-60.4781
	-60.4269																					-68.3032	-60.4719
	-60.4176																					-68.2964	-60.4719
	-60.4081																					-68.2897	-60.55
	-60.3984																					-68.2829	-60.55
	-60.3887																					-68.2757	-60.5312
	-60.3789																					-68.2681	-60.5312
	-60.3691																					-68.2599	-60.5344
	-60.3593																					-68.2512	-60.5344
	-60.3495																					-68.242	-60.5125
	-60.3397																					-68.2324	-60.5125
	-60.3299																					-68.2224	-60.45
	-60.32																					-68.2121	-60.45
	-60.3099																					-68.2017	-60.3969
	-60.2997																					-68.1912	-60.3969
	-60.2893																					-68.1809	-60.4344
	-60.2788																					-68.1711	-60.4344
	-60.2682																					-68.1618	-60.5125
	-60.2574																					-68.1532	-60.5125
	-60.2467																					-68.1457	-60.4188
	-60.236																					-68.1391	-60.4188
	-60.2254																					-68.1337	-60.4312
	-60.2149																					-68.1292	-60.4312
	-60.2044																					-68.1257	-60.4813
	-60.1941																					-68.1228	-60.4813
	-60.1838																					-68.1205	-60.4875
	-60.1735																					-68.1184	-60.4875
	-60.1631																					-68.1162	-60.4906
	-60.1526																					-68.1138	-60.4906
	-60.142																					-68.111	-60.3656
	-60.1312																					-68.1075	-60.3656
	-60.12																					-68.1034	-60.3406
	-60.1086																					-68.0986	-60.3406
	-60.0967																					-68.0931	-60.2656
	-60.0844																					-68.0869	-60.2656
	-60.0717																					-68.08	-60.2656
	-60.0585																					-68.0724	-60.2656
	-60.0449																					-68.0642	-60.2875
	-60.0309																					-68.0553	-60.2875
	-60.0166																					-68.0458	-60.175
	-60.0023																					-68.0357	-60.175
	-59.9881																					-68.0252	-60.0875
	-59.9741																					-68.0143	-60.0875
	-59.9607																					-68.0033	-60.1375
	-59.9481																					-67.9923	-60.1375
	-59.9363																					-67.9815	-60.0969
	-59.9254																					-67.971	-60.0969
	-59.9155																					-67.9607	-60.0938
	-59.9065																					-67.9506	-60.0938
	-59.8983																					-67.9406	-60
	-59.8906																					-67.9306	-60
	-59.8833																					-67.9202	-59.9844
	-59.8762																					-67.9095	-59.9844
	-59.869																					-67.8984	-59.975
	-59.8616																					-67.887	-59.975
	-59.8539																					-67.8755	-59.9688
	-59.8458																					-67.8644	-59.9688
	-59.8373																					-67.8539	-59.9781
	-59.8284																					-67.8443	-59.9781
	-59.8192																					-67.8359	-59.975
	-59.8096																					-67.8288	-59.975
	-59.7996																					-67.8229	-59.95
	-59.7894																					-67.818	-59.95
	-59.7789																					-67.8138	-59.95
	-59.7681																					-67.8098	-59.95
	-59.757																					-67.8058	-59.9219
	-59.7458																					-67.8014	-59.9219
	-59.7342																					-67.7962	-59.7875
	-59.7226																					-67.7899	-59.7875
	-59.7107																					-67.7826	-59.75
	-59.6988																					-67.7742	-59.75
	-59.6867																					-67.7647	-59.8
	-59.6746																					-67.7544	-59.8
	-59.6624																					-67.7435	-59.7344
	-59.6501																					-67.7322	-59.7344
	-59.6378																					-67.7209	-59.7375
	-59.6255																					-67.7098	-59.7375
	-59.6131																					-67.6992	-59.7562
	-59.6008																					-67.6891	-59.7562
	-59.5886																					-67.6796	-59.6562
	-59.5764																					-67.6707	-59.6562
	-59.5644																					-67.6623	-59.5719
	-59.5526																					-67.6544	-59.5719
	-59.5409																					-67.6467	-59.5219
	-59.5294																					-67.6391	-59.5219
	-59.518																					-67.6314	-59.4656
	-59.5066																					-67.6236	-59.4656
	-59.4952																					-67.6154	-59.3812
	-59.4836																					-67.607	-59.3812
	-59.4718																					-67.5982	-59.3937
	-59.4595																					-67.5892	-59.3937
	-59.4466																					-67.58	-59.35
	-59.4332																					-67.5709	-59.35
	-59.419																					-67.5619	-59.375
	-59.4041																					-67.5534	-59.375
	-59.3885																					-67.5455	-59.4062
	-59.3723																					-67.5384	-59.4062
	-59.3557																					-67.5322	-59.3687
	-59.3388																					-67.5269	-59.3687
	-59.3218																					-67.5224	-59.2281
	-59.3048																					-67.5188	-59.2281
	-59.288																					-67.5155	-59.2625
	-59.2716																					-67.5125	-59.2625
	-59.2555																					-67.5093	-59.1969
	-59.2399																					-67.5056	-59.1969
	-59.2247																					-67.501	-59.1
	-59.2098																					-67.4954	-59.1
	-59.1953																					-67.4887	-59.0687
	-59.181																					-67.4808	-59.0687
	-59.1669																					-67.4717	-59.0875
	-59.1528																					-67.4619	-59.0875
	-59.1389																					-67.4515	-59.05
	-59.125																					-67.4408	-59.05
	-59.1112																					-67.4303	-59.1
	-59.0975																					-67.4203	-59.1
	-59.0841																					-67.411	-59.1
	-59.0711																					-67.4025	-59.1
	-59.0584																					-67.395	-59.0469
	-59.0461																					-67.3882	-59.0469
	-59.0344																					-67.3822	-59.0906
	-59.023																					-67.3766	-59.0906
	-59.0121																					-67.3712	-58.9406
	-59.0014																					-67.3659	-58.9406
	-58.9908																					-67.3605	-58.8937
	-58.9802																					-67.3549	-58.8937
	-58.9695																					-67.3493	-58.9156
	-58.9584																					-67.3436	-58.9156
	-58.9469																					-67.338	-58.9
	-58.9349																					-67.3326	-58.9
	-58.9226																					-67.3274	-58.9875
	-58.9098																					-67.3225	-58.9875
	-58.8967																					-67.3178	-58.9188
	-58.8833																					-67.3131	-58.9188
	-58.8699																					-67.3083	-58.8281
	-58.8565																					-67.303	-58.8281
	-58.8431																					-67.2973	-58.85
	-58.8297																					-67.2909	-58.85
	-58.8165																					-67.2837	-58.8438
	-58.8033																					-67.276	-58.8438
	-58.79																					-67.2677	-58.8375
	-58.7768																					-67.259	-58.8375
	-58.7634																					-67.2501	-58.8125
	-58.75																					-67.2411	-58.8125
	-58.7365																					-67.232	-58.75
	-58.723																					-67.2229	-58.75
	-58.7095																					-67.2137	-58.7188
	-58.6963																					-67.2046	-58.7188
	-58.6833																					-67.1954	-58.7031
	-58.6707																					-67.1862	-58.7031
	-58.6585																					-67.177	-58.7062
	-58.6468																					-67.1677	-58.7062
	-58.6356																					-67.1583	-58.6875
	-58.6249																					-67.1488	-58.6875
	-58.6144																					-67.1392	-58.7125
	-58.6042																					-67.1294	-58.7125
	-58.5941																					-67.1195	-58.6063
	-58.5838																					-67.1094	-58.6063
	-58.5733																					-67.0992	-58.5094
	-58.5624																					-67.0891	-58.5094
	-58.5509																					-67.079	-58.5594
	-58.5389																					-67.069	-58.5594
	-58.5263																					-67.0592	-58.5656
	-58.5131																					-67.0496	-58.5656
	-58.4994																					-67.0403	-58.6
	-58.4855																					-67.0313	-58.6
	-58.4714																					-67.0227	-58.5531
	-58.4573																					-67.0145	-58.5531
	-58.4434																					-67.0071	-58.5344
	-58.4297																					-67.0003	-58.5344
	-58.4165																					-66.9942	-58.4844
	-58.4037																					-66.9888	-58.4844
	-58.3914																					-66.9838	-58.4375
	-58.3795																					-66.9791	-58.4375
	-58.3681																					-66.9741	-58.475
	-58.3571																					-66.9686	-58.475
	-58.3464																					-66.9622	-58.4188
	-58.336																					-66.9545	-58.4188
	-58.3258																					-66.9454	-58.4531
	-58.3159																					-66.9348	-58.4531
	-58.306																					-66.923	-58.3781
	-58.2961																					-66.9101	-58.3781
	-58.2863																					-66.8965	-58.3062
	-58.2763																					-66.8827	-58.3062
	-58.2662																					-66.8691	-58.3125
	-58.2558																					-66.8559	-58.3125
	-58.2452																					-66.8434	-58.35
	-58.2343																					-66.8315	-58.35
	-58.2232																					-66.8202	-58.3594
	-58.212																					-66.8092	-58.3594
	-58.2007																					-66.7981	-58.3094
	-58.1894																					-66.7868	-58.3094
	-58.1783																					-66.775	-58.275
	-58.1675																					-66.7624	-58.275
	-58.1571																					-66.7492	-58.1812
	-58.1471																					-66.7356	-58.1812
	-58.1377																					-66.7216	-58.2375
	-58.1288																					-66.7078	-58.2375
	-58.1205																					-66.6943	-58.1531
	-58.1126																					-66.6813	-58.1531
	-58.1052																					-66.6691	-58.225
	-58.0981																					-66.6576	-58.225
	-58.0913																					-66.6467	-58.1594
	-58.0847																					-66.6362	-58.1594
	-58.0781																					-66.6259	-58.2219
	-58.0715																					-66.6155	-58.2219
	-58.0648																					-66.6048	-58.15
	-58.058																					-66.5937	-58.15
	-58.0509																					-66.582	-58.1
	-58.0435																					-66.57	-58.1
	-58.0358																					-66.5577	-57.9562
	-58.0278																					-66.5454	-57.9562
	-58.0194																					-66.5333	-58.0594
	-58.0106																					-66.5217	-58.0594
	-58.0014																					-66.511	-58.0562
	-57.9919																					-66.5015	-58.0562
	-57.982																					-66.4932	-58.0219
	-57.9717																					-66.4863	-58.0219
	-57.9612																					-66.4807	-58.0562
	-57.9505																					-66.4762	-58.0562
	-57.9396																					-66.4725	-57.9656
	-57.9286																					-66.4693	-57.9656
	-57.9175																					-66.4661	-57.9312
	-57.9063																					-66.4625	-57.9312
	-57.8951																					-66.4583	-57.95
	-57.8839																					-66.4531	-57.95
	-57.8727																					-66.447	-57.9031
	-57.8616																					-66.4398	-57.9031
	-57.8507																					-66.4318	-57.9344
	-57.84																					-66.4231	-57.9344
	-57.8297																					-66.4139	-57.925
	-57.8197																					-66.4045	-57.925
	-57.8103																					-66.3951	-57.85
	-57.8013																					-66.3858	-57.85
	-57.7929																					-66.3768	-57.8563
	-57.7848																					-66.3682	-57.8563
	-57.7772																					-66.3602	-57.85
	-57.7698																					-66.3526	-57.85
	-57.7626																					-66.3455	-57.8
	-57.7555																					-66.3386	-57.8
	-57.7485																					-66.3317	-57.8906
	-57.7417																					-66.3245	-57.8906
	-57.735																					-66.3167	-57.8219
	-57.7285																					-66.3078	-57.8219
	-57.7224																					-66.2978	-57.8062
	-57.7165																					-66.2864	-57.8062
	-57.711																					-66.2736	-57.8062
	-57.7056																					-66.2595	-57.8062
	-57.7001																					-66.2442	-57.7625
	-57.6945																					-66.2282	-57.7625
	-57.6882																					-66.2117	-57.6969
	-57.6812																					-66.1951	-57.6969
	-57.6731																					-66.1786	-57.6562
	-57.6637																					-66.1626	-57.6562
	-57.6531																					-66.1472	-57.6437
	-57.6411																					-66.1326	-57.6437
	-57.6281																					-66.1188	-57.75
	-57.6143																					-66.1057	-57.75
	-57.6001																					-66.0935	-57.6688
	-57.5858																					-66.082	-57.6688
	-57.5718																					-66.0712	-57.5719
	-57.5584																					-66.0612	-57.5719
	-57.5458																					-66.0518	-57.6375
	-57.5343																					-66.0431	-57.6375
	-57.5237																					-66.0349	-57.625
	-57.5139																					-66.0272	-57.625
	-57.5048																					-66.0197	-57.55
	-57.4961																					-66.0122	-57.55
	-57.4875																					-66.0045	-57.5406
	-57.4787																					-65.9962	-57.5406
	-57.4695																					-65.9873	-57.45
	-57.4596																					-65.9775	-57.45
	-57.4491																					-65.9668	-57.45
	-57.438																					-65.9554	-57.45
	-57.4262																					-65.9434	-57.5
	-57.414																					-65.9311	-57.5
	-57.4015																					-65.9189	-57.5469
	-57.3889																					-65.9069	-57.5469
	-57.3765																					-65.8956	-57.5562
	-57.3643																					-65.8851	-57.5562
	-57.3526																					-65.8756	-57.5438
	-57.3413																					-65.8672	-57.5438
	-57.3304																					-65.8599	-57.4375
	-57.3199																					-65.8535	-57.4375
	-57.3095																					-65.8479	-57.4
	-57.2991																					-65.8429	-57.4
	-57.2887																					-65.8384	-57.3469
	-57.2779																					-65.834	-57.3469
	-57.2668																					-65.8295	-57.3438
	-57.2554																					-65.8248	-57.3438
	-57.2436																					-65.8197	-57.4125
	-57.2315																					-65.814	-57.4125
	-57.2192																					-65.8077	-57.4062
	-57.2069																					-65.8007	-57.4062
	-57.1946																					-65.7929	-57.3969
	-57.1824																					-65.7845	-57.3969
	-57.1705																					-65.7754	-57.3781
	-57.1588																					-65.7657	-57.3781
	-57.1474																					-65.7554	-57.2875
	-57.1362																					-65.7446	-57.2875
	-57.1253																					-65.7332	-57.275
	-57.1147																					-65.7214	-57.275
	-57.1044																					-65.7091	-57.2719
	-57.0945																					-65.6964	-57.2719
	-57.0849																					-65.6832	-57.2594
	-57.0758																					-65.6699	-57.2594
	-57.0673																					-65.6563	-57.2313
	-57.0592																					-65.6427	-57.2313
	-57.0516																					-65.6291	-57.2062
	-57.0445																					-65.6158	-57.2062
	-57.0377																					-65.6027	-57.1437
	-57.0312																					-65.5901	-57.1437
	-57.0248																					-65.578	-57.1719
	-57.0184																					-65.5666	-57.1719
	-57.0119																					-65.5558	-57.0219
	-57.0053																					-65.5457	-57.0219
	-56.9984																					-65.5362	-57.0687
	-56.9914																					-65.5274	-57.0687
	-56.9841																					-65.5191	-57.1594
	-56.9766																					-65.5115	-57.1594
	-56.969																					-65.5044	-57.1625
	-56.9613																					-65.4981	-57.1625
	-56.9536																					-65.4925	-57.1594
	-56.9458																					-65.4881	-57.1594
	-56.9379																					-65.485	-57.2188
	-56.9301																					-65.4839	-57.2188
	-56.9222																					-65.4856	-57.15
	-56.9143																					-65.4913	-57.15
	-56.9063																					-65.5029	-57.0906
	-56.8983																					-65.5232	-57.0906
	-56.8902																					-65.5557	-56.9844
	-56.8819																					-65.605	-56.9844
	-56.8735																					-65.6762	-56.9031
	-56.8648																					-65.7747	-56.9031
	-56.856																					-65.9048	-56.8906
	-56.847																					-66.0692	-56.8906
	-56.8379																					-66.2676	-56.8875
	-56.8288																					-66.4959	-56.8875
	-56.8198																					-66.7448	-56.9344
	-56.8111																					-67.0005	-56.9344
	-56.8028																					-67.2449	-56.9875
	-56.795																					-67.4567	-56.9875
	-56.7879																					-67.6138	-56.9844
	-56.7815																					-67.6953	-56.9844
	-56.7759																					-67.6842	-56.9969
	-56.7711																					-67.5698	-56.9969
	-56.7669																					-67.3494	-56.975
	-56.7633																					-67.0293	-56.975
	-56.7601																					-66.6247	-56.8844
	-56.757																					-66.1586	-56.8844
	-56.7541																					-65.66	-56.875
	-56.751																					-65.1606	-56.875
	-56.7477																					-64.6923	-56.9094
	-56.7441																					-64.2837	-56.9094
	-56.7401																					-63.9574	-56.825
	-56.7358																					-63.7281	-56.825
	-56.7311																					-63.6021	-56.8406
	-56.726																					-63.5766	-56.8406
	-56.7206																					-63.6413	-56.8906
	-56.7147																					-63.78	-56.8906
	-56.7085																					-63.9728	-56.8656
	-56.7018																					-64.1981	-56.8656
	-56.6946																					-64.4354	-56.825
	-56.6869																					-64.6667	-56.825
	-56.6786																					-64.8776	-56.7719
	-56.6699																					-65.0584	-56.7719
	-56.6608																					-65.2035	-56.7875
	-56.6514																					-65.3116	-56.7875
	-56.6419																					-65.3845	-56.8219
	-56.6324																					-65.4263	-56.8219
	-56.6231																					-65.4424	-56.7844
	-56.6142																					-65.4385	-56.7844
	-56.6058																					-65.4202	-56.8156
	-56.598																					-65.3923	-56.8156
	-56.5908																					-65.359	-56.8531
	-56.5843																					-65.3232	-56.8531
	-56.5783																					-65.287	-56.9062
	-56.5728																					-65.252	-56.9062
	-56.5676																					-65.2189	-56.8438
	-56.5625																					-65.1883	-56.8438
	-56.5575																					-65.1603	-56.75
	-56.5524																					-65.135	-56.75
	-56.547																					-65.1124	-56.775
	-56.5412																					-65.0921	-56.775
	-56.5349																					-65.074	-56.8062
	-56.5282																					-65.0579	-56.8062
	-56.521																					-65.0434	-56.7844
	-56.5134																					-65.0302	-56.7844
	-56.5054																					-65.0182	-56.7906
	-56.497																					-65.007	-56.7906
	-56.4884																					-64.9964	-56.8094
	-56.4796																					-64.9861	-56.8094
	-56.4708																					-64.9759	-56.7219
	-56.462																					-64.9654	-56.7219
	-56.4534																					-64.9546	-56.6719
	-56.4448																					-64.9432	-56.6719
	-56.4366																					-64.931	-56.6562
	-56.4286																					-64.9181	-56.6562
	-56.4209																					-64.9045	-56.6562
	-56.4135																					-64.8903	-56.6562
	-56.4064																					-64.8758	-56.6
	-56.3996																					-64.8611	-56.6
	-56.3932																					-64.8465	-56.6719
	-56.3871																					-64.8321	-56.6719
	-56.3813																					-64.818	-56.6
	-56.3758																					-64.8041	-56.6
	-56.3706																					-64.7905	-56.5969
	-56.3656																					-64.777	-56.5969
	-56.3607																					-64.7637	-56.5875
	-56.3559																					-64.7505	-56.5875
	-56.3509																					-64.7374	-56.6
	-56.3458																					-64.7247	-56.6
	-56.3405																					-64.7124	-56.6312
	-56.3348																					-64.7007	-56.6312
	-56.3289																					-64.6896	-56.6937
	-56.3226																					-64.6794	-56.6937
	-56.3162																					-64.67	-56.6469
	-56.3096																					-64.6613	-56.6469
	-56.303																					-64.6534	-56.6437
	-56.2965																					-64.6459	-56.6437
	-56.2901																					-64.6388	-56.6
	-56.2839																					-64.6319	-56.6
	-56.2779																					-64.625	-56.6375
	-56.2719																					-64.6179	-56.6375
	-56.2659																					-64.6105	-56.6
	-56.2597																					-64.6028	-56.6
	-56.2533																					-64.5948	-56.5719
	-56.2464																					-64.5865	-56.5719
	-56.2391																					-64.5779	-56.5094
	-56.2312																					-64.5693	-56.5094
	-56.2229																					-64.5606	-56.4437
	-56.2142																					-64.5521	-56.4437
	-56.2054																					-64.5437	-56.4875
	-56.1966																					-64.5356	-56.4875
	-56.188																					-64.5278	-56.5281
	-56.1799																					-64.5204	-56.5281
	-56.1725																					-64.5133	-56.5281
	-56.1659																					-64.5067	-56.5281
	-56.1602																					-64.5006	-56.525
	-56.1554																					-64.495	-56.525
	-56.1515																					-64.4897	-56.5187
	-56.1484																					-64.4848	-56.5187
	-56.1458																					-64.4799	-56.5625
	-56.1435																					-64.475	-56.5625
	-56.1414																					-64.4697	-56.4719
	-56.1391																					-64.4638	-56.4719
	-56.1365																					-64.457	-56.5094
	-56.1334																					-64.4491	-56.5094
	-56.1296																					-64.4398	-56.5156
	-56.1252																					-64.429	-56.5156
	-56.1203																					-64.4168	-56.4594
	-56.1148																					-64.403	-56.4594
	-56.1089																					-64.3878	-56.4937
	-56.103																					-64.3714	-56.4937
	-56.0971																					-64.3539	-56.5
	-56.0916																					-64.3357	-56.5
	-56.0866																					-64.3171	-56.4719
	-56.0822																					-64.2985	-56.4719
	-56.0787																					-64.2802	-56.475
	-56.0759																					-64.2626	-56.475
	-56.0739																					-64.246	-56.4594
	-56.0726																					-64.2306	-56.4594
	-56.0717																					-64.2164	-56.4188
	-56.0712																					-64.2035	-56.4188
	-56.0709																					-64.1916	-56.4156
	-56.0704																					-64.1805	-56.4156
	-56.0697																					-64.1699	-56.4531
	-56.0686																					-64.1592	-56.4531
	-56.0669																					-64.1483	-56.4188
	-56.0646																					-64.1367	-56.4188
	-56.0615																					-64.1244	-56.3906
	-56.0576																					-64.1113	-56.3906
	-56.053																					-64.0973	-56.4281
	-56.0476																					-64.0827	-56.4281
	-56.0415																					-64.0675	-56.5
	-56.0347																					-64.0519	-56.5
	-56.0273																					-64.0361	-56.4656
	-56.0195																					-64.02	-56.4656
	-56.0115																					-64.0037	-56.4437
	-56.0033																					-63.9872	-56.4437
	-55.9951																					-63.9705	-56.4719
	-55.9873																					-63.9538	-56.4719
	-55.9798																					-63.9371	-56.4188
	-55.9728																					-63.9206	-56.4188
	-55.9664																					-63.9044	-56.3187
	-55.9606																					-63.8889	-56.3187
	-55.9554																					-63.874	-56.3125
	-55.9507																					-63.8599	-56.3125
	-55.9465																					-63.8465	-56.3344
	-55.9425																					-63.8336	-56.3344
	-55.9386																					-63.8211	-56.2906
	-55.9348																					-63.8084	-56.2906
	-55.9309																					-63.7954	-56.25
	-55.9268																					-63.7814	-56.25
	-55.9226																					-63.7663	-56.2781
	-55.9182																					-63.7499	-56.2781
	-55.9135																					-63.7319	-56.3156
	-55.9087																					-63.7125	-56.3156
	-55.9036																					-63.692	-56.2562
	-55.8982																					-63.6705	-56.2562
	-55.8925																					-63.6487	-56.3031
	-55.8865																					-63.6269	-56.3031
	-55.8802																					-63.6053	-56.2875
	-55.8735																					-63.5845	-56.2875
	-55.8663																					-63.5645	-56.275
	-55.8587																					-63.5454	-56.275
	-55.8506																					-63.5271	-56.275
	-55.842																					-63.5097	-56.275
	-55.833																					-63.493	-56.2656
	-55.8236																					-63.4769	-56.2656
	-55.8138																					-63.4612	-56.2437
	-55.8039																					-63.4458	-56.2437
	-55.7939																					-63.4307	-56.3094
	-55.784																					-63.4158	-56.3094
	-55.7744																					-63.4011	-56.3438
	-55.7655																					-63.3865	-56.3438
	-55.7572																					-63.3719	-56.2406
	-55.7499																					-63.3573	-56.2406
	-55.7435																					-63.3425	-56.2313
	-55.7382																					-63.3275	-56.2313
	-55.7339																					-63.3122	-56.2719
	-55.7304																					-63.2963	-56.2719
	-55.7276																					-63.28	-56.3187
	-55.7252																					-63.2631	-56.3187
	-55.7231																					-63.2457	-56.2625
	-55.7209																					-63.2279	-56.2625
	-55.7184																					-63.2099	-56.2062
	-55.7154																					-63.1919	-56.2062
	-55.7118																					-63.1741	-56.2281
	-55.7074																					-63.1566	-56.2281
	-55.7023																					-63.1395	-56.2313
	-55.6963																					-63.1227	-56.2313
	-55.6896																					-63.1062	-56.1969
	-55.6821																					-63.09	-56.1969
	-55.6739																					-63.0739	-56.1469
	-55.6653																					-63.0579	-56.1469
	-55.6562																					-63.0421	-56.1094
	-55.647																					-63.0266	-56.1094
	-55.6379																					-63.0115	-56.1063
	-55.629																					-62.997	-56.1063
	-55.6206																					-62.9832	-56.15
	-55.6129																					-62.9703	-56.15
	-55.6062																					-62.9581	-56.1063
	-55.6004																					-62.9467	-56.1063
	-55.5958																					-62.9358	-56.1781
	-55.5923																					-62.9253	-56.1781
	-55.5898																					-62.915	-56.1437
	-55.5884																					-62.9046	-56.1437
	-55.5878																					-62.8942	-56.0938
	-55.588																					-62.8838	-56.0938
	-55.5887																					-62.8734	-56.0938
	-55.5899																					-62.8631	-56.0938
	-55.5914																					-62.8529	-56.1063
	-55.5931																					-62.8428	-56.1063
	-55.5951																					-62.8328	-56.2
	-55.5972																					-62.8227	-56.2
	-55.5996																					-62.8124	-56.125
	-55.6021																					-62.8016	-56.125
	-55.6048																					-62.7903	-56.0781
	-55.6076																					-62.7783	-56.0781
	-55.6106																					-62.7656	-56.0906
	-55.6137																					-62.7522	-56.0906
	-55.6169																					-62.7382	-56.0938
	-55.62																					-62.7237	-56.0938
	-55.6232																					-62.709	-56.075
	-55.6262																					-62.6942	-56.075
	-55.6291																					-62.6797	-56.0812
	-55.6319																					-62.6655	-56.0812
	-55.6346																					-62.652	-56.0844
	-55.6372																					-62.639	-56.0844
	-55.6397																					-62.6268	-56.0625
	-55.6421																					-62.6153	-56.0625
	-55.6444																					-62.6043	-56.0375
	-55.6467																					-62.5939	-56.0375
	-55.6489																					-62.5838	-56.0344
	-55.651																					-62.5738	-56.0344
	-55.6529																					-62.564	-55.9625
	-55.6546																					-62.554	-55.9625
	-55.6562																					-62.5438	-56
	-55.6576																					-62.5332	-56
	-55.6589																					-62.5222	-56.0531
	-55.6601																					-62.5106	-56.0531
	-55.6613																					-62.4985	-56.0187
	-55.6627																					-62.4857	-56.0187
	-55.6641																					-62.4723	-56.0375
	-55.6658																					-62.4583	-56.0375
	-55.6678																					-62.4436	-55.9094
	-55.67																					-62.4285	-55.9094
	-55.6725																					-62.413	-55.9844
	-55.6751																					-62.3974	-55.9844
	-55.6778																					-62.3819	-56.0187
	-55.6805																					-62.3667	-56.0187
	-55.6829																					-62.3521	-55.975
	-55.6851																					-62.3385	-55.975
	-55.6867																					-62.3259	-55.9562
	-55.6878																					-62.3145	-55.9562
	-55.6882																					-62.3044	-55.9688
	-55.6879																					-62.2953	-55.9688
	-55.6867																					-62.2873	-55.9344
	-55.6847																					-62.2798	-55.9344
	-55.682																					-62.2727	-55.9562
	-55.6786																					-62.2656	-55.9562
	-55.6745																					-62.258	-56.0469
	-55.67																					-62.2497	-56.0469
	-55.6652																					-62.2405	-55.9719
	-55.6602																					-62.2302	-55.9719
	-55.6553																					-62.2187	-56.0094
	-55.6505																					-62.2062	-56.0094
	-55.6459																					-62.1927	-55.9594
	-55.6417																					-62.1786	-55.9594
	-55.6379																					-62.1639	-56.0031
	-55.6345																					-62.1491	-56.0031
	-55.6315																					-62.1344	-56.0187
	-55.6289																					-62.12	-56.0187
	-55.6264																					-62.1062	-56.0219
	-55.6241																					-62.0932	-56.0219
	-55.6218																					-62.081	-55.95
	-55.6195																					-62.0696	-55.95
	-55.617																					-62.0589	-55.9156
	-55.6143																					-62.0487	-55.9156
	-55.6113																					-62.0387	-55.95
	-55.608																					-62.0286	-55.95
	-55.6044																					-62.018	-55.9781
	-55.6006																					-62.0068	-55.9781
	-55.5967																					-61.9948	-55.9469
	-55.5928																					-61.982	-55.9469
	-55.5891																					-61.9685	-55.9937
	-55.5857																					-61.9544	-55.9937
	-55.583																					-61.9402	-55.9688
	-55.581																					-61.926	-55.9688
	-55.5799																					-61.9124	-55.9312
	-55.5799																					-61.8995	-55.9312
	-55.5809																					-61.8876	-55.9344
	-55.5831																					-61.8768	-55.9344
	-55.5862																					-61.8671	-55.9906
	-55.59																					-61.8583	-55.9906
	-55.5945																					-61.8502	-55.9344
	-55.5992																					-61.8422	-55.9344
	-55.6041																					-61.834	-55.875
	-55.6087																					-61.8252	-55.875
	-55.613																					-61.8156	-55.9188
	-55.6167																					-61.8049	-55.9188
	-55.6198																					-61.793	-55.925
	-55.6223																					-61.7803	-55.925
	-55.6241																					-61.7669	-55.95
	-55.6253																					-61.7531	-55.95
	-55.6259																					-61.7394	-55.9062
	-55.626																					-61.7262	-55.9062
	-55.6256																					-61.7136	-55.9156
	-55.6248																					-61.7021	-55.9156
	-55.6237																					-61.6916	-55.9281
	-55.6223																					-61.6821	-55.9281
	-55.6206																					-61.6736	-55.9344
	-55.6187																					-61.666	-55.9344
	-55.6168																					-61.6589	-55.8906
	-55.6148																					-61.6521	-55.8906
	-55.613																					-61.6454	-55.85
	-55.6115																					-61.6385	-55.85
	-55.6102																					-61.6311	-55.7812
	-55.6093																					-61.6229	-55.7812
	-55.6087																					-61.614	-55.8156
	-55.6085																					-61.604	-55.8156
	-55.6085																					-61.5931	-55.8062
	-55.6086																					-61.5814	-55.8062
	-55.6086																					-61.5688	-55.85
	-55.6084																					-61.5558	-55.85
	-55.6078																					-61.5425	-55.7906
	-55.6066																					-61.5292	-55.7906
	-55.6048																					-61.5162	-55.7375
	-55.6024																					-61.5039	-55.7375
	-55.5994																					-61.4925	-55.7437
	-55.5959																					-61.4823	-55.7437
	-55.5921																					-61.4735	-55.7844
	-55.588																					-61.4661	-55.7844
	-55.5838																					-61.46	-55.8531
	-55.5796																					-61.455	-55.8531
	-55.5756																					-61.4506	-55.7906
	-55.5718																					-61.4466	-55.7906
	-55.5682																					-61.4423	-55.6875
	-55.5647																					-61.4372	-55.6875
	-55.5613																					-61.4309	-55.6875
	-55.5578																					-61.4232	-55.6875
	-55.5542																					-61.4139	-55.7375
	-55.5504																					-61.4032	-55.7375
	-55.5463																					-61.3913	-55.8344
	-55.5418																					-61.3784	-55.8344
	-55.5371																					-61.365	-55.7406
	-55.5322																					-61.3515	-55.7406
	-55.5271																					-61.3379	-55.7562
	-55.5222																					-61.3246	-55.7562
	-55.5174																					-61.3116	-55.7219
	-55.5129																					-61.2988	-55.7219
	-55.509																					-61.2863	-55.7625
	-55.5055																					-61.274	-55.7625
	-55.5026																					-61.262	-55.7406
	-55.5002																					-61.2503	-55.7406
	-55.4984																					-61.239	-55.7156
	-55.497																					-61.2281	-55.7156
	-55.4958																					-61.2178	-55.7969
	-55.4949																					-61.208	-55.7969
	-55.4941																					-61.1985	-55.7781
	-55.4932																					-61.1893	-55.7781
	-55.4922																					-61.18	-55.7469
	-55.4911																					-61.1704	-55.7469
	-55.4898																					-61.1599	-55.7062
	-55.4882																					-61.1483	-55.7062
	-55.4865																					-61.1353	-55.6156
	-55.4847																					-61.1207	-55.6156
	-55.4828																					-61.1043	-55.7375
	-55.481																					-61.0864	-55.7375
	-55.4794																					-61.067	-55.7969
	-55.4779																					-61.0464	-55.7969
	-55.4768																					-61.0252	-55.7687
	-55.476																					-61.0038	-55.7687
	-55.4757																					-60.9826	-55.6531
	-55.4758																					-60.9623	-55.6531
	-55.4764																					-60.9431	-55.7
	-55.4775																					-60.9254	-55.7
	-55.4791																					-60.9093	-55.75
	-55.481																					-60.8949	-55.75
	-55.4833																					-60.8821	-55.7812
	-55.4858																					-60.8707	-55.7812
	-55.4884																					-60.8604	-55.7094
	-55.4908																					-60.851	-55.7094
	-55.493																					-60.8422	-55.7969
	-55.4948																					-60.8339	-55.7969
	-55.496																					-60.8258	-55.7594
	-55.4965																					-60.8179	-55.7594
	-55.4962																					-60.8101	-55.7875
	-55.495																					-60.8022	-55.7875
	-55.4931																					-60.7943	-55.8125
	-55.4903																					-60.7863	-55.8125
	-55.4869																					-60.778	-55.8125
	-55.4829																					-60.7694	-55.8125
	-55.4785																					-60.7604	-55.7812
	-55.4738																					-60.751	-55.7812
	-55.4689																					-60.7414	-55.85
	-55.4641																					-60.7315	-55.85
	-55.4594																					-60.7217	-55.8344
	-55.4552																					-60.7121	-55.8344
	-55.4515																					-60.7031	-55.8156
	-55.4485																					-60.6946	-55.8156
	-55.4464																					-60.6868	-55.825
	-55.4453																					-60.6794	-55.825
	-55.4454																					-60.6721	-55.8312
	-55.4467																					-60.6646	-55.8312
	-55.4493																					-60.6564	-55.85
	-55.4531																					-60.6472	-55.85
	-55.458																					-60.6367	-55.7188
	-55.4641																					-60.6248	-55.7188
	-55.471																					-60.6115	-55.8344
	-55.4788																					-60.5971	-55.8344
	-55.4872																					-60.5819	-55.8531
	-55.4962																					-60.5662	-55.8531
	-55.5054																					-60.5504	-55.9062
	-55.5148																					-60.5349	-55.9062
	-55.5243																					-60.5199	-55.8969
	-55.5335																					-60.5056	-55.8969
	-55.5424																					-60.492	-55.8531
	-55.5507																					-60.479	-55.8531
	-55.5583																					-60.4666	-55.8469
	-55.565																					-60.4546	-55.8469
	-55.5707																					-60.443	-55.8844
	-55.5754																					-60.4318	-55.8844
	-55.5791																					-60.4207	-55.8344
	-55.5818																					-60.41	-55.8344
	-55.5838																					-60.3997	-55.7812
	-55.5851																					-60.3898	-55.7812
	-55.586																					-60.3805	-55.7656
	-55.5868																					-60.3716	-55.7656
	-55.5876																					-60.3633	-55.6812
	-55.5885																					-60.3554	-55.6812
	-55.5898																					-60.3478	-55.6531
	-55.5915																					-60.3402	-55.6531
	-55.5935																					-60.3326	-55.7156
	-55.5958																					-60.3247	-55.7156
	-55.5984																					-60.3165	-55.75
	-55.6012																					-60.3078	-55.75
	-55.604																					-60.2988	-55.8219
	-55.6067																					-60.2895	-55.8219
	-55.6094																					-60.2801	-55.7437
	-55.612																					-60.2709	-55.7437
	-55.6143																					-60.2619	-55.7375
	-55.6165																					-60.2531	-55.7375
	-55.6186																					-60.2447	-55.7375
	-55.6205																					-60.2364	-55.7375
	-55.6224																					-60.2281	-55.7375
	-55.6243																					-60.2196	-55.7375
	-55.6262																					-60.2108	-55.7437
	-55.628																					-60.2015	-55.7437
	-55.6298																					-60.1917	-55.8156
	-55.6314																					-60.1814	-55.8156
	-55.6329																					-60.1709	-55.775
	-55.6341																					-60.1602	-55.775
	-55.6348																					-60.1495	-55.7125
	-55.6352																					-60.1389	-55.7125
	-55.635																					-60.1283	-55.6469
	-55.6344																					-60.1176	-55.6469
	-55.6332																					-60.1067	-55.6875
	-55.6317																					-60.0953	-55.6875
	-55.6298																					-60.0831	-55.7
	-55.6277																					-60.07	-55.7
	-55.6254																					-60.0559	-55.7625
	-55.623																					-60.0408	-55.7625
	-55.6206																					-60.0248	-55.7219
	-55.6183																					-60.0081	-55.7219
	-55.6159																					-59.9912	-55.7406
	-55.6136																					-59.9744	-55.7406
	-55.6114																					-59.9583	-55.7906
	-55.6091																					-59.9431	-55.7906
	-55.6069																					-59.9294	-55.7188
	-55.6047																					-59.9173	-55.7188
	-55.6026																					-59.907	-55.6781
	-55.6006																					-59.8984	-55.6781
	-55.5987																					-59.8915	-55.7281
	-55.597																					-59.8859	-55.7281
	-55.5955																					-59.8813	-55.6719
	-55.5942																					-59.8773	-55.6719
	-55.5933																					-59.8735	-55.5938
	-55.5926																					-59.8694	-55.5938
	-55.5923																					-59.8646	-55.6937
	-55.5922																					-59.8588	-55.6937
	-55.5925																					-59.852	-55.6625
	-55.5932																					-59.844	-55.6625
	-55.5941																					-59.8351	-55.725
	-55.5954																					-59.826	-55.725
	-55.5969																					-59.8177	-55.5969
	-55.5986																					-59.812	-55.5969
	-55.6004																					-59.8111	-55.5531
	-55.6023																					-59.8184	-55.5531
	-55.6041																					-59.8381	-55.6063
	-55.6057																					-59.8749	-55.6063
	-55.607																					-59.9345	-55.6937
	-55.6078																					-60.0223	-55.6937
	-55.6082																					-60.1427	-55.7938
	-55.608																					-60.2986	-55.7938
	-55.6073																					-60.4897	-55.7062
	-55.6061																					-60.7117	-55.7062
	-55.6044																					-60.9558	-55.6375
	-55.6025																					-61.208	-55.6375
	-55.6005																					-61.45	-55.6375
	-55.5984																					-61.6605	-55.6375
	-55.5965																					-61.8169	-55.6656
	-55.5949																					-61.8978	-55.6656
	-55.5937																					-61.8856	-55.7094
	-55.593																					-61.7691	-55.7094
[truncated: 47,503 more rows]
