# Supplementary material for: Dendritic sodium spikes are required for long-term potentiation at distal synapses on hippocampal pyramidal neurons
Source: eLife. 2015 Aug 6;4:e06414. doi: 10.7554/eLife.06414 (PMC4576155; doi:10.7554/eLife.06414)
Supplement: Figure 7—source data 1. — DOI: http://dx.doi.org/10.7554/eLife.06414.025 [file elife06414s010.xlsx]

## Sheet: Figure 7
For two-photon imaging, sampling rate (Hz): Top, Control = 294.1, TTX = 303.0; Bottom, Control = 416.7, AP5 = 384.6	Panel B	∆G/R	Control	TTX	I	Control	TTX	∆G/R	Control	AP5	I	Control	AP5		Panel C	Top		TTX	AP5	Bottom		TTX	AP5
Artifacts are truncated in figures			-0.0119521	0.00738728		-27.1404	-22.1959		0.0290419	0.0107442		6.30503	3.73197				Mean	0.59215	0.22604		Mean	0.70163	0.25052
			-0.00324929	0.0173727		-27.2226	-21.7627		0.0333685	0.00582235		6.40676	3.88456				SEM	0.12099	0.07198		SEM	0.12463	0.09034
			0.00722673	0.0259721		-27.2334	-21.3927		0.0338285	0.00180415		6.71193	4.5712
			0.0185337	0.0310148		-27.1984	-21.1103		0.0313854	-0.000411189		7.42401	4.64749
			0.0293932	0.0310633		-27.1461	-20.9237		0.0271635	-0.000887069		8.64471	4.72379
			0.0381605	0.025955		-27.0958	-20.8306		0.0221156	-0.000563212		8.74644	3.96085
			0.0433958	0.0169559		-27.0505	-20.8245		0.0169074	-0.000667536		9.86542	4.11344
			0.0451201	0.00655037		-26.9988	-20.8991		0.0120029	-0.00196649		10.4758	4.72379
			0.0462478	-0.00194762		-26.9243	-21.0458		0.007822	-0.00430253		10.7809	5.33414
			0.0532996	-0.00480053		-26.8177	-21.2489		0.00482255	-0.00668476		11.0861	5.25785
			0.0756865	0.00172258		-26.6847	-21.4812		0.00344085	-0.0078523		12.1034	5.33414
			0.123571	0.0208		-26.5454	-21.7065		0.00394379	-0.00695298		13.2224	6.24967
			0.2051	0.05442		-26.425	-21.8882		0.00632685	-0.00394395		14.2396	6.86002
			0.32414	0.102897		-26.342	-22.0021		0.0103883	0.000478383		14.5448	7.0889
			0.479307	0.164854		-26.2996	-22.045		0.0160206	0.00532385		15.2569	7.69925
			0.664386	0.237787		-26.2846	-22.0356		0.0236234	0.00984372		14.9517	7.62296
			0.869605	0.318911		-26.2722	-22.0046		0.0344254	0.013873		15.562	8.46219
			1.08307	0.40582		-26.2347	-21.9804		0.0504806	0.0178544		17.0879	7.92813
			1.29206	0.49653		-26.1486	-21.9767		0.074218	0.0225997		18.1052	8.61478
			1.48419	0.588947		-26.0006	-21.9906		0.107637	0.028943		19.2241	8.69107
			1.64898	0.680211		-25.7898	-22.0107		0.151454	0.0374277		19.2241	9.98807
			1.77967	0.766533		-25.5286	-22.0315		0.204581	0.0481159		20.1397	10.8273
			1.87476	0.843877		-25.241	-22.0631		0.264221	0.0605605		20.2414	11.3614
			1.93831	0.909283		-24.9583	-22.1314		0.326568	0.0739463		20.0379	11.9717
			1.97858	0.962181		-24.7142	-22.2656		0.387816	0.087341		21.4621	12.5821
			2.00517	1.00487		-24.5386	-22.4814		0.445032	0.0999319		21.6655	13.1924
			2.02589	1.04174		-24.4536	-22.7683		0.496527	0.111115		22.5811	13.4213
			2.04468	1.07739		-24.4695	-23.0874		0.541661	0.120411		22.3776	13.1161
			2.06136	1.11451		-24.5836	-23.3812		0.580334	0.127336		23.0897	13.5739
			2.07297	1.15257		-24.7794	-23.5907		0.612535	0.131393		23.4966	14.2605
			2.0761	1.18809		-25.0304	-23.6734		0.638215	0.132269		23.9035	14.4131
			2.06911	1.21635		-25.3056	-23.6149		0.657505	0.130091		24.0052	14.642
			2.05325	1.23362		-25.576	-23.431		0.671032	0.125557		24.2087	15.4049
			2.03244	1.2387		-25.8194	-23.1611		0.68009	0.119793		23.5983	15.1761
			2.01161	1.23294		-26.021	-22.8553		0.686484	0.114019		22.0724	15.1761
			1.99451	1.21903		-26.1714	-22.5588		0.692085	0.109218		21.9707	14.4131
			1.98195	1.19937		-26.2629	-22.2992		0.698286	0.105965		22.1742	14.7183
			1.97135	1.17517		-26.2895	-22.0799		0.705583	0.104453		23.0897	14.4131
			1.958	1.1466		-26.2475	-21.8827		0.713471	0.104592		23.0897	15.1761
			1.93748	1.11373		-26.139	-21.6794		0.720738	0.106092		23.1914	15.4812
			1.90797	1.07739		-25.9739	-21.4464		0.726027	0.108476		22.6828	16.3205
			1.87142	1.03957		-25.7698	-21.1785		0.72841	0.111121		22.3776	15.939
			1.83263	1.00314		-25.5495	-20.8947		0.727695	0.113373		21.2586	16.5494
			1.79677	0.971139		-25.337	-20.634		0.72433	0.114751		21.4621	15.8627
			1.76675	0.945973		-25.1544	-20.4438		0.719012	0.115114		20.5466	16.0153
			1.74184	0.928861		-25.0215	-20.3649		0.712279	0.114688		19.9362	15.6338
			1.71852	0.919649		-24.9575	-20.4196		0.704332	0.113903		19.2241	15.0998
			1.693	0.916967		-24.9838	-20.608		0.695146	0.113156		17.6983	13.1924
			1.66386	0.918579		-25.1228	-20.9107		0.684705	0.112633		16.5793	13.0398
			1.63313	0.921747		-25.3919	-21.2956		0.67319	0.112274		15.7655	13.345
			1.60538	0.923564		-25.793	-21.7235		0.661016	0.11186		15.0534	13.4213
			1.58523	0.921243		-26.3036	-22.1516		0.648765	0.111118		13.9344	13.0398
			1.5749	0.912431		-26.8734	-22.5365		0.637092	0.109762		14.1379	13.5739
			1.57319	0.895562		-27.431	-22.8382		0.626648	0.10749		12.612	13.1924
			1.57615	0.870242		-27.8994	-23.0267		0.618022	0.104011		11.2896	12.2006
			1.57905	0.83758		-28.214	-23.0875		0.611678	0.0991562		11.2896	11.8954
			1.57831	0.800248		-28.3387	-23.0243		0.60788	0.0930548		10.9844	11.9717
			1.57251	0.762078		-28.2712	-22.8565		0.606596	0.0862656		10.9844	11.8191
			1.56204	0.727101		-28.0386	-22.6137		0.60741	0.0797737		9.86542	11.5902
			1.54788	0.698263		-27.6855	-22.3304		0.609484	0.0747924		10.0689	11.5139
			1.53059	0.676344		-27.2605	-22.0426		0.611662	0.0724129		9.35679	11.2851
			1.50999	0.659688		-26.8064	-21.7862		0.61271	0.0732227		8.33954	10.9036
			1.48571	0.645088		-26.357	-21.5956		0.611664	0.0770498		8.03436	10.9036
			1.45795	0.629521		-25.9372	-21.4992		0.608121	0.0829605		8.23781	10.0644
			1.4278	0.611926		-25.565	-21.5142		0.602325	0.0895348		7.93264	10.5221
			1.39689	0.593977		-25.2527	-21.6418		0.594992	0.0953259		8.03436	8.61478
			1.36671	0.579375		-25.0069	-21.8652		0.586948	0.0993213		7.22056	8.15702
			1.33804	0.57197		-24.8288	-22.1537		0.578754	0.101217		7.42401	7.54666
			1.31093	0.573777		-24.7165	-22.4693		0.570511	0.101397		7.11884	7.01261
			1.28513	0.583927		-24.6673	-22.7743		0.561926	0.100655		7.11884	5.56302
			1.26063	0.599023		-24.6786	-23.0364		0.552587	0.0997842		7.11884	5.33414
			1.23799	0.614518		-24.7461	-23.231		0.542305	0.0992637		6.71193	4.72379
			1.21829	0.626293		-24.8594	-23.3408		0.531325	0.0991466		6.10158	4.49491
			1.20255	0.6317		-24.9989	-23.3584		0.520302	0.0991797		5.28778	3.3505
			1.191	0.629817		-25.137	-23.2887		0.510044	0.0990398		5.49123	3.57938
			1.18243	0.621106		-25.2442	-23.151		0.501158	0.0985426		6.20331	3.2742
			1.17433	0.606906		-25.296	-22.9749		0.493797	0.097735		7.11884	4.18973
			1.16382	0.58903		-25.2792	-22.7896		0.487665	0.0968547		7.11884	3.96085
			1.14916	0.569507		-25.1917	-22.6122		0.482259	0.0961985		7.93264	4.41861
			1.1309	0.550311		-25.0413	-22.4413		0.477215	0.09595		8.64471	4.03714
			1.11185	0.533034		-24.8433	-22.2627		0.472559	0.09603		8.54299	4.87638
			1.09593	0.518597		-24.6207	-22.0632		0.468739	0.0960485		7.93264	4.64749
			1.08634	0.507251		-24.4041	-21.8457		0.466423	0.0954348		9.45852	5.48673
			1.08408	0.498949		-24.23	-21.6349		0.466166	0.0937436		10.374	5.10526
			1.08762	0.493881		-24.134	-21.4712		0.468075	0.0910018		10.5775	5.10526
			1.09365	0.492738		-24.1429	-21.3946		0.471605	0.0878728		10.9844	4.95267
			1.09856	0.496403		-24.2679	-21.4279		0.475589	0.0854677		11.5947	5.10526
			1.09975	0.505129		-24.5037	-21.5669		0.47849	0.0848389		11.493	5.25785
			1.09622	0.517725		-24.8326	-21.7813		0.478814	0.0864135		11.2896	4.95267
			1.08849	0.531333		-25.2299	-22.0246		0.475548	0.0897012		10.7809	3.96085
			1.07792	0.542089		-25.6672	-22.2483		0.468517	0.0934658		12.2051	3.50309
			1.06612	0.546415		-26.1119	-22.4145		0.458528	0.0962697		12.5103	3.65567
			1.05451	0.542287		-26.5256	-22.5026		0.447262	0.0970778		11.2896	4.49491
			1.04402	0.529811		-26.8666	-22.511		0.43685	0.0955865		11.3913	4.95267
			1.03492	0.51087		-27.0968	-22.4531		0.429218	0.0921438		12.4085	5.8682
			1.02657	0.488157		-27.1943	-22.3514		0.425403	0.0873914		12.7137	5.8682
			1.01751	0.464245		-27.1634	-22.2303		0.42514	0.0819118		13.5275	6.86002
			1.0058	0.441249		-27.0381	-22.1092		0.426969	0.0761057		13.9344	7.01261
			0.989707	0.421097		-26.8742	-21.9993		0.428834	0.0703185		14.1379	7.54666
			0.968392	0.405942		-26.7341	-21.9044		0.428932	0.0650542		14.4431	7.85184
			0.94224	0.398063		-26.6685	-21.8257		0.426352	0.0610632		14.2396	7.85184
			0.912762	0.399026		-26.7034	-21.7673		0.421235	0.059194		15.2569	8.53849
			0.88214	0.408568		-26.8345	-21.7399		0.414446	0.0600655		15.7655	8.3859
			0.852733	0.424043		-27.0312	-21.7579		0.407027	0.0637295		16.681	8.00443
			0.826762	0.441035		-27.2459	-21.8337		0.399766	0.0695098		16.4776	8.46219
			0.806159	0.454919		-27.4274	-21.9707		0.393036	0.0761191		16.681	9.37772
			0.792399	0.462468		-27.5357	-22.1603		0.386865	0.0820257		16.681	9.30143
						-27.5518	-22.3835		0.381073	0.0859266		16.8845	10.217
						-27.4823	-22.6172		0.375411	0.0871352		17.1896	9.45401
						-27.3537	-22.8422		0.369717	0.0857268		16.9862	8.61478
						-27.1994	-23.0498		0.364118	0.0823963		16.9862	9.14884
						-27.0452	-23.2435		0.359202	0.078114		15.562	8.76737
						-26.8984	-23.434		0.355991	0.0737523		15.9689	9.07254
						-26.7468	-23.6302		0.355591	0.0698526		16.681	9.22513
						-26.5668	-23.8294		0.358615	0.0666068		17.5965	9.83548
						-26.3366	-24.0145		0.364669	0.0640041		17.2914	9.98807
						-26.0498	-24.1595		0.372226	0.0620144		17.4948	9.98807
						-25.7214	-24.2396		0.379027	0.0606838		18.4103	10.217
						-25.3857	-24.2388		0.382889	0.0600957		18.3086	9.98807
						-25.0851	-24.1502		0.382563	0.0602529		18.1052	9.37772
						-24.8566	-23.9733		0.37824	0.0609898		18.5121	9.53031
						-24.7205	-23.7113		0.371469	0.0620052		18.7155	9.22513
						-24.6756	-23.3734		0.364489	0.0630136		18.8172	8.99625
						-24.7031	-22.9797		0.359261	0.0639097		19.7328	8.46219
						-24.7756	-22.5617		0.356633	0.0647992		19.631	9.45401
						-24.8685	-22.1585		0.356049	0.0658317		19.631	9.53031
						-24.9687	-21.8083		0.355897	0.0669242		19.631	10.217
						-25.0787	-21.5414		0.354334	0.0675831		19.631	9.30143
						-25.2115	-21.3769		0.350149	0.0670073		19.7328	10.1407
						-25.3801	-21.322		0.343274	0.064475		18.6138	10.4458
						-25.5846	-21.3711		0.334751	0.0598065		18.0034	10.2932
						-25.8049	-21.5033		0.326265	0.0536085		17.6983	9.45401
						-26.0024	-21.681		0.319498	0.0471119		18.5121	10.5984
						-26.1329	-21.8525		0.315614	0.0416573		18.919	10.8273
						-26.1641	-21.9617		0.31504	0.0381009		18.7155	11.6665
						-26.0891	-21.9623		0.317558	0.0364659		17.9017	11.8191
						-25.9286	-21.8311		0.322571	0.036022		18.5121	11.6665
						-25.7226	-21.5759		0.329345	0.035728		17.2914	11.6665
						-25.5154	-21.2347		0.337074			17.6983	12.1243
						-25.3432	-20.8663		0.344778			16.8845	11.8191
						-25.2284	-20.5352		0.351197			15.7655	11.5139
						-25.1815	-20.2939		0.354882			16.0707	10.5221
						-25.2048	-20.1693		0.354571			15.562	10.6747
						-25.2953	-20.1567		0.349698			15.0534	10.2932
						-25.446	-20.2262		0.340703			15.1551	10.8273
						-25.6451	-20.337		0.328915			14.1379	9.6066
						-25.8774	-20.4538		0.316022			14.2396	9.98807
						-26.1263	-20.5574		0.303429			13.3241	9.98807
						-26.3755	-20.6461		0.291878			12.4085	10.1407
						-26.6088	-20.7284					10.5775	8.84366
						-26.8095	-20.8113					9.66197	8.3096
						-26.9604	-20.8919					9.56024	7.39408
						-27.0466	-20.9568					9.25507	7.69925
						-27.0595	-20.9892					9.56024	7.54666
						-26.9994	-20.98					9.05162	8.53849
						-26.8748	-20.9344					9.76369	7.47037
						-26.6999	-20.8707					10.1706	7.85184
						-26.492	-20.812					10.374	7.0889
						-26.2721	-20.78					9.96714	7.54666
						-26.0642	-20.7941					9.56024	6.55484
						-25.8923	-20.8758					8.64471	6.40226
						-25.7736	-21.052					8.84816	6.32596
						-25.7119	-21.3502					9.86542	6.63114
						-25.6946	-21.7857					9.25507	6.02079
						-25.6989	-22.3468					9.25507	5.56302
						-25.7009	-22.9875					9.25507	5.25785
						-25.6856	-23.6324					9.76369	5.71561
						-25.6503	-24.1942					9.56024	5.10526
						-25.6027	-24.5954					9.05162	4.72379
						-25.5552	-24.7877					8.03436	3.73197
						-25.5203	-24.762					8.23781	4.11344
						-25.5075	-24.5465					8.74644	3.96085
						-25.5226	-24.1969					8.84816	3.65567
						-25.5655	-23.7801					9.15334	3.19791
						-25.6284	-23.3596					8.94989	3.57938
						-25.6967	-22.9832					9.76369	4.03714
						-25.7513	-22.6764					10.1706	4.18973
						-25.7752	-22.4416					10.4758	4.11344
						-25.7601	-22.2633					10.7809	5.02896
						-25.7097	-22.1169					10.9844	4.49491
						-25.6379	-21.9808					10.0689	5.56302
						-25.5638	-21.8452					10.374	4.72379
						-25.5038	-21.7171					11.0861	5.18155
						-25.4675	-21.6172					11.7982	5.33414
						-25.4578	-21.5723					11.6965	5.63932
						-25.4751	-21.6036					12.3068	5.56302
						-25.5222	-21.7177					12.9172	6.02079
						-25.6053	-21.9006					13.4258	5.56302
						-25.7304	-22.119					13.5275	5.56302
						-25.8965	-22.3268					13.5275	5.8682
						-26.0904	-22.4769					14.0362	6.32596
						-26.2856	-22.5331					15.2569	6.86002
						-26.449	-22.4804					15.1551	7.92813
						-26.5513	-22.3284					15.562	7.62296
						-26.5776	-22.1076					16.2741	7.39408
						-26.5328	-21.8598					16.0707	7.24149
						-26.4387	-21.6271					17.0879	7.77555
						-26.3251	-21.4433					17.4948	8.08072
						-26.2186	-21.3296					17.2914	8.69107
						-26.1353	-21.2955					18.4103	8.00443
						-26.0817	-21.3428					17.9017	8.3096
						-26.0599	-21.4697					17.6983	9.07254
						-26.0748	-21.6709					17.4948	9.6829
						-26.1346	-21.9357					18.8172	9.75919
						-26.2454	-22.2438					19.0207	10.751
						-26.4026	-22.5659					19.2241	10.1407
						-26.5866	-22.8691					18.919	10.217
						-26.7665	-23.1253					17.8	10.4458
						-26.9115	-23.3172					17.3931	10.751
						-27.0019	-23.4391					17.8	9.98807
						-27.0336	-23.493					18.1052	10.5221
						-27.0142	-23.4848					17.8	10.9036
						-26.9533	-23.4227					17.1896	11.1325
						-26.8558	-23.3187					16.9862	11.4377
						-26.7198	-23.1884					16.7827	11.5139
						-26.5411	-23.0481					15.562	11.2851
						-26.3179	-22.9111					15.3586	11.5902
						-26.0558	-22.7876					15.562	11.5139
						-25.7679	-22.6883					15.562	11.8191
						-25.4745	-22.6296					15.4603	11.2088
						-25.2006	-22.6323					14.9517	11.5902
						-24.9724	-22.7148					14.9517	12.2769
						-24.8143	-22.8812					15.562	12.5058
						-24.7453	-23.1146					15.7655	12.2769
						-24.7767	-23.3791					16.5793	12.048
						-24.9088	-23.6301					17.1896	11.4377
						-25.1289	-23.8266					16.1724	12.048
						-25.4099	-23.9396					15.1551	11.9717
						-25.7125	-23.9534					15.1551	11.5139
						-25.992	-23.863					15.4603	11.6665
						-26.2086	-23.6719					15.1551	12.3532
						-26.3364	-23.3931					15.1551	12.4295
						-26.3674	-23.0511					15.0534	11.6665
						-26.3084	-22.682					14.7482	10.4458
						-26.1741	-22.3265					14.4431	10.9799
						-25.9811	-22.0183					15.0534	10.6747
						-25.7466	-21.7719					14.3413	10.3695
						-25.4909	-21.5789					14.1379	10.3695
						-25.2408	-21.4166					13.8327	9.83548
						-25.0288	-21.2643					13.6293	9.6829
						-24.8879	-21.1199					12.7137	9.83548
						-24.8441	-21.0057					12.9172	9.6829
						-24.9104	-20.96					13.3241	9.83548
						-25.0847	-21.0177					13.3241	9.6066
						-25.3526	-21.1915					12.9172	10.0644
						-25.6911	-21.4625					12.8155	9.83548
						-26.074	-21.7866					11.493	10.1407
						-26.4748	-22.1106					11.2896	9.91178
						-26.8692	-22.3897					11.7982	10.1407
						-27.2363	-22.5962					11.1878	8.76737
						-27.5574	-22.7173					10.8827	8.91996
						-27.8142	-22.7451					10.0689	7.54666
						-27.988	-22.6696					8.74644	6.70743
						-28.0587	-22.4795					8.84816	6.63114
						-28.0085	-22.1751					8.23781	5.7919
						-27.8275	-21.7819					8.13609	5.71561
						-27.5209	-21.3588					7.93264	5.48673
						-27.115	-20.9895					7.72919	5.71561
						-26.6563	-20.76					8.44126	5.33414
						-26.2039	-20.7302					8.84816	4.41861
						-25.8168	-20.9129					8.54299	5.18155
						-25.5398	-21.2702					8.84816	4.80008
						-25.3954	-21.7278					9.56024	5.02896
						-25.3799	-22.2008					9.86542	5.25785
						-25.4667	-22.6194					9.25507	5.18155
						-25.6123	-22.9446					8.64471	5.56302
						-25.7663	-23.1669					9.15334	5.7919
						-25.8829	-23.2936					9.45852	5.41043
						-25.9315	-23.3328					9.66197	5.63932
						-25.9042	-23.2843					9.96714	5.33414
						-25.8152	-23.1441					10.374	5.56302
						-25.6939	-22.9158					10.0689	5.94449
						-25.5735	-22.6184					10.8827	5.56302
						-25.4801	-22.2839					10.8827	5.48673
						-25.4261	-21.9446					10.9844	6.02079
						-25.4082	-21.6202					10.8827	6.70743
						-25.4116	-21.3152					10.6792	6.40226
						-25.4176	-21.0282					11.8999	6.93631
						-25.4112	-20.7654					12.2051	7.47037
						-25.3876	-20.5478					11.7982	7.39408
						-25.3537	-20.4059					11.493	7.54666
						-25.3258	-20.3666					12.612	6.93631
						-25.3243	-20.4406					12.7137	7.54666
						-25.3665	-20.618					12.0016	8.00443
						-25.4613	-20.8716					12.7137	8.3096
						-25.606	-21.1654					13.0189	8.15702
						-25.7869	-21.4605					14.0362	8.08072
						-25.9823	-21.7193					15.2569	7.62296
						-26.168	-21.9089					16.1724	7.0889
						-26.3236	-22.0062					17.6983	6.93631
						-26.4364	-22.0056					18.1052	6.55484
						-26.5044	-21.9236					18.4103	5.8682
						-26.5347	-21.7973					18.919	6.55484
						-26.5386	-21.6736					19.2241	6.40226
						-26.5271	-21.593					19.0207	7.01261
						-26.5074	-21.5742					18.919	6.93631
						-26.4824	-21.6075					18.3086	7.54666
						-26.4537	-21.6599					18.5121	7.31778
						-26.4239	-21.6895					18.7155	7.85184
						-26.3992	-21.665					18.2069	7.62296
						-26.389	-21.5794					18.4103	8.15702
						-26.4042	-21.4545					17.8	7.92813
						-26.4535	-21.3324					18.2069	8.76737
						-26.5391	-21.2581					18.5121	9.53031
						-26.6534	-21.2642					19.0207	10.9799
						-26.779	-21.3631					18.0034	12.048
						-26.8904	-21.5486					17.5965	12.8109
						-26.9584	-21.8056					18.8172	13.6502
						-26.9543	-22.1172					19.0207	13.8028
						-26.8554	-22.4677					19.2241	14.642
						-26.6497	-22.8398					19.631	15.1761
						-26.3406	-23.2113					19.7328	15.4049
						-25.9494	-23.5539					19.7328	15.4812
						-25.5135	-23.8385					18.8172	15.0235
						-25.0811	-24.0425					19.4276	15.3286
						-24.7026	-24.158					18.8172	14.7183
						-24.4211	-24.1952					18.919	15.4049
						-24.2659	-24.1796					17.8	14.642
						-24.2485	-24.1408					17.2914	14.642
						-24.3622	-24.1003					16.1724	13.1924
						-24.5846	-24.0602					15.1551	12.9635
						-24.8801	-24.002					15.4603	13.0398
						-25.204	-23.8939					15.4603	13.0398
						-25.5079	-23.7028					15.0534	11.9717
						-25.7488	-23.406					14.7482	11.6665
						-25.9002	-22.9972					13.5275	10.2932
						-25.9602	-22.4866					13.5275	10.6747
						-25.9529	-21.8986					13.5275	10.217
						-25.9181	-21.2698					13.3241	10.5984
						-25.8942	-20.6464					12.1034	10.1407
						-25.9022	-20.0804					12.4085	9.75919
						-25.94	-19.6228					11.3913	9.6829
						-25.9882	-19.314					11.1878	9.75919
						-26.0249	-19.1748					10.1706	8.84366
						-26.0386	-19.2025					9.96714	8.76737
						-26.0333	-19.3738					8.84816	8.61478
						-26.0261	-19.6548					8.54299	8.61478
						-26.0387	-20.0127					8.13609	8.00443
						-26.0901	-20.4227					6.81366	7.62296
						-26.1921	-20.8677					5.69468	6.86002
						-26.3471	-21.3313					6.50848	7.39408
						-26.5491	-21.7894					8.03436	7.69925
						-26.7838	-22.2065					7.93264	7.69925
						-27.0307	-22.5393					8.74644	7.31778
						-27.2652	-22.7478					8.33954	7.39408
						-27.4624	-22.8086					8.23781	6.86002
						-27.6009	-22.7263					8.64471	7.0889
						-27.6668	-22.5388					9.45852	7.85184
						-27.6549	-22.3116					8.74644	8.3096
						-27.569	-22.1207					8.94989	7.69925
						-27.4192	-22.0302					9.25507	8.00443
						-27.2185	-22.071					8.64471	8.00443
						-26.9809	-22.2317					9.35679	7.85184
						-26.7203	-22.4647					9.15334	7.62296
						-26.4506	-22.7059					9.15334	7.85184
						-26.1849	-22.8979					9.35679	7.0889
						-25.9336	-23.0073					9.76369	7.39408
						-25.7024	-23.0319					9.35679	6.70743
						-25.4921	-22.9968					8.94989	6.86002
						-25.3016	-22.942					8.94989	7.01261
						-25.1318	-22.9074					10.1706	7.54666
						-24.9898	-22.9166					10.0689	7.24149
						-24.8885	-22.9672					10.7809	6.78373
						-24.8425	-23.03					11.493	6.17337
						-24.8622	-23.0603					10.9844	5.8682
						-24.9484	-23.0177					11.3913	5.8682
						-25.0894	-22.8847					11.3913	5.33414
						-25.2627	-22.6743					12.1034	5.33414
						-25.4403	-22.4245					12.5103	5.7919
						-25.5964	-22.1808					12.612	6.09708
						-25.7142	-21.9785					13.0189	6.17337
						-25.7898	-21.8324					12.612	6.17337
						-25.831	-21.7371					12.7137	6.47855
						-25.8507	-21.6749					12.612	6.63114
						-25.8594	-21.6258					12.7137	7.01261
						-25.8595	-21.5746					11.7982	6.24967
						-25.8444	-21.5146					11.493	6.17337
						-25.804	-21.4486					11.493	6.40226
						-25.7318	-21.3881					11.6965	6.78373
						-25.6318	-21.3495					11.8999	6.63114
						-25.52	-21.3483					12.3068	6.47855
						-25.421	-21.3914					13.2224	6.70743
						-25.361	-21.4722					13.2224	7.69925
						-25.36	-21.569					14.0362	7.77555
						-25.427	-21.6515					14.7482	9.6066
						-25.5575	-21.6921					15.6638	9.30143
						-25.7356	-21.6777					17.2914	10.2932
						-25.9369	-21.6167					17.3931	9.98807
						-26.1334	-21.5365					17.6983	10.751
						-26.2986	-21.4724					18.1052	10.751
						-26.4127	-21.4549					18.4103	11.1325
						-26.468	-21.4993					19.631	10.9036
						-26.4719	-21.6041					19.9362	10.9799
						-26.4456	-21.7544					20.75	11.0562
						-26.4168	-21.9272					20.75	10.6747
						-26.4091	-22.0961					20.2414	10.2932
						-26.4307	-22.2354					20.3431	11.3614
						-26.4711	-22.3263					20.8517	11.2088
						-26.5054	-22.3644					19.9362	10.5984
						-26.5061	-22.3661					19.1224	10.4458
						-26.4543	-22.367					19.7328	10.2932
						-26.3462	-22.4107					19.1224	9.91178
						-26.1922	-22.5308					18.8172	10.5221
						-26.0112	-22.7336					17.4948	10.5984
						-25.8246	-22.992					17.8	11.4377
						-25.6529	-23.2525					17.6983	11.5139
						-25.5135	-23.4548					17.5965	12.048
						-25.4185	-23.553					17.1896	11.6665
						-25.3727	-23.5317					16.7827	12.3532
						-25.3725	-23.4094					16.8845	12.2769
						-25.4054	-23.2296					16.3758	12.5058
						-25.4536	-23.0465					16.2741	12.4295
						-25.4985	-22.9079					16.1724	12.1243
						-25.5269	-22.8454					15.3586	10.8273
						-25.535	-22.8702					14.9517	11.1325
						-25.5282	-22.9754					14.2396	10.5221
						-25.5165	-23.1406					14.2396	10.6747
						-25.5082	-23.3355					13.3241	9.45401
						-25.5054	-23.5237					11.5947	9.22513
						-25.5061	-23.6674					11.7982	9.30143
						-25.5098	-23.7339					11.493	9.45401
						-25.5239	-23.7032					11.0861	9.37772
						-25.5638	-23.573					10.4758	9.53031
						-25.6471	-23.3583					10.7809	9.37772
						-25.7837	-23.0859					10.5775	9.6066
						-25.9686	-22.7866					10.8827	9.14884
						-26.1805	-22.49					11.3913	9.30143
						-26.388	-22.2207					10.9844	8.99625
						-26.5596	-21.9958					10.374	8.84366
						-26.6722	-21.8224					10.0689	7.69925
						-26.7173	-21.6956					10.0689	7.92813
						-26.7014	-21.5992					9.35679	7.16519
						-26.6425	-21.5125					8.54299	7.54666
						-26.5633	-21.4191					8.03436	6.63114
						-26.4829	-21.3158					7.93264	6.70743
						-26.4124	-21.2142					7.62746	6.47855
						-26.3547	-21.1374					7.62746	5.7919
						-26.3097	-21.112					7.32229	5.25785
						-26.2797	-21.1607					6.71193	5.56302
						-26.2721	-21.2972					7.22056	5.10526
						-26.2969	-21.5219					7.62746	5.41043
						-26.3611	-21.8179					7.42401	4.87638
						-26.4639	-22.1485					7.22056	5.33414
						-26.5945	-22.459					7.83091	4.72379
						-26.7325	-22.6873					8.03436	5.02896
						-26.8516	-22.7825					8.13609	4.26603
						-26.9242	-22.7251					8.23781	3.80826
						-26.9281	-22.5383					8.64471	4.11344
						-26.8536	-22.2832					8.33954	3.57938
						-26.7071	-22.0389					8.54299	3.3505
						-26.5124	-21.8743					8.33954	2.81644
						-26.3054	-21.8259					7.11884	2.28238
						-26.1247	-21.8901					7.62746	3.19791
						-26.0014	-22.0309					7.72919	2.89273
						-25.9484	-22.1987					8.44126	2.96903
						-25.9563	-22.3492					9.05162	2.89273
						-25.9952	-22.4562					8.33954	3.42679
						-26.0251	-22.5132					9.86542	3.88456
						-26.0084	-22.5264					10.1706	3.96085
						-25.9236	-22.5055					10.6792	4.64749
						-25.7718	-22.4581					11.8999	5.7919
						-25.5762	-22.39					12.5103	6.09708
						-25.3737	-22.3077					13.0189	6.93631
						-25.2023	-22.2196					15.0534	7.0889
						-25.0886	-22.1321					15.3586	7.39408
						-25.0405	-22.0446					15.7655	7.31778
						-25.0465	-21.9492					15.7655	8.3096
						-25.0836	-21.8382					16.8845	8.3859
						-25.128	-21.7158					17.3931	8.84366
						-25.1652	-21.6041					17.3931	8.91996
						-25.1939	-21.5372					16.4776	9.14884
						-25.2232	-21.546					17.4948	9.14884
						-25.2654	-21.643					18.0034	10.0644
						-25.329	-21.8171					18.3086	10.6747
						-25.4149	-22.0415					18.919	11.3614
						-25.518	-22.2876					18.8172	12.1243
						-25.63	-22.5364					19.7328	12.8109
						-25.743	-22.7797					19.5293	11.8954
						-25.8521	-23.014					19.631	12.8109
						-25.956	-23.2317					20.0379	13.1161
						-26.0573	-23.4167					19.7328	13.4976
						-26.1612	-23.546					19.631	13.8791
						-26.272	-23.5968					20.4448	14.0317
						-26.3892	-23.5535					19.3259	13.8028
						-26.5046	-23.4139					19.2241	14.5657
						-26.6039	-23.1917					19.1224	14.0317
						-26.672	-22.9156					18.5121	14.2605
						-26.7007	-22.6261					18.6138	14.7183
						-26.6937	-22.3695					17.0879	14.1842
						-26.6662	-22.1893					16.9862	13.9554
						-26.639	-22.117					17.0879	14.1842
						-26.6294	-22.1636					17.4948	14.0317
						-26.6434	-22.3159					17.3931	13.4976
						-26.6728	-22.5378					17.1896	12.7347
						-26.6972	-22.7794					16.3758	13.5739
						-26.6923	-22.9904					16.5793	14.2605
						-26.6406	-23.1355					16.3758	14.4131
						-26.5396	-23.2035					15.8672	13.8791
						-26.4044	-23.2072					15.562	14.1842
						-26.2609	-23.1727					15.2569	13.7265
						-26.1346	-23.1229					14.5448	13.2687
						-26.0418	-23.0636					14.7482	12.8109
						-25.9853	-22.9788					14.4431	12.4295
						-25.9589	-22.8389					14.1379	12.2769
						-25.9536	-22.6171					13.2224	11.5902
						-25.9618	-22.3085					13.1206	11.1325
						-25.9782	-21.9406					12.0016	10.6747
						-25.9969	-21.5714					11.1878	9.53031
						-26.0098	-21.2727					11.2896	8.91996
						-26.0048	-21.1056					11.0861	8.84366
						-25.9688	-21.0997					10.5775	8.76737
						-25.8912	-21.2459					10.5775	8.61478
						-25.7694	-21.5052					11.2896	8.15702
						-25.6124	-21.8271					11.1878	8.00443
						-25.4406	-22.1667					11.493	8.00443
						-25.281	-22.4916					11.1878	7.77555
						-25.1597	-22.7797					10.2723	8.84366
						-25.0948	-23.0133					10.1706	8.23331
						-25.0941	-23.176					9.05162	8.84366
						-25.1569	-23.2561					8.54299	7.92813
						-25.2788	-23.2504					8.54299	7.62296
						-25.4547	-23.1677					8.94989	7.92813
						-25.6786	-23.0278					8.54299	7.77555
						-25.9408	-22.8575					8.54299	6.93631
						-26.2253	-22.6855					7.93264	7.16519
						-26.5099	-22.537					7.22056	6.09708
						-26.7692	-22.4291					7.72919	5.63932
						-26.9788	-22.3703					8.03436	5.41043
						-27.1193	-22.3638					8.44126	5.8682
						-27.1772	-22.4133					8.33954	4.95267
						-27.1458	-22.5281					7.93264	5.33414
						-27.0248	-22.7217					7.83091	5.18155
						-26.8207	-23.0047					7.52574	5.8682
						-26.5474	-23.3752					7.52574	5.8682
						-26.2265	-23.8124					7.93264	6.24967
						-25.8867	-24.277					8.84816	6.17337
						-25.5615	-24.718					8.23781	6.86002
						-25.2851	-25.0835					7.52574	7.54666
						-25.0887	-25.3306					8.54299	7.92813
						-24.9958	-25.4315					8.94989	8.00443
						-25.0179	-25.3757					9.35679	8.3096
						-25.1522	-25.1672					10.5775	8.69107
						-25.3802	-24.8206					10.8827	9.07254
						-25.6699	-24.3571					11.0861	8.99625
						-25.9809	-23.8035					11.1878	9.07254
						-26.2714	-23.1913					11.493	9.53031
						-26.5055	-22.5583					11.8999	9.91178
						-26.6583	-21.9484					12.1034	9.53031
						-26.7177	-21.4094					12.4085	9.98807
						-26.6826	-20.9876					12.4085	9.30143
						-26.5604	-20.7178					12.3068	9.30143
						-26.3656	-20.6141					12.7137	9.6829
						-26.119	-20.6651					12.9172	10.2932
						-25.8474	-20.8366					13.5275	9.6829
						-25.5809	-21.0817					13.6293	10.2932
						-25.348	-21.3535					14.6465	10.5984
						-25.1699	-21.6149					13.9344	10.6747
						-25.0562	-21.8427					14.2396	10.5221
						-25.0038	-22.0268					15.7655	11.8191
						-25.0001	-22.1667					17.0879	11.2851
						-25.0275	-22.2676					17.3931	12.048
						-25.0687	-22.3363					18.0034	11.8954
						-25.11	-22.3784					17.6983	11.5139
						-25.1431	-22.3964					17.9017	11.1325
						-25.1652	-22.3911					18.5121	12.1243
						-25.1791	-22.3661					18.8172	12.2769
						-25.1917	-22.3327					19.1224	12.8872
						-25.2124	-22.3113					19.5293	13.1161
						-25.2492	-22.3272					19.2241	13.1924
						-25.3057	-22.4018					19.8345	12.6584
						-25.3792	-22.5439					20.1397	13.4213
						-25.4607	-22.7472					20.2414	13.4976
						-25.5376	-22.9929					20.6483	12.9635
						-25.597	-23.2584					20.75	12.2769
						-25.631	-23.5258					20.5466	13.1924
						-25.6417	-23.7872					20.3431	13.0398
						-25.6427	-24.0446					19.4276	13.6502
						-25.6554	-24.3043					20.4448	13.345
						-25.6999	-24.5691					20.5466	13.8028
						-25.7857	-24.8302					21.2586	13.8791
						-25.9073	-25.0631					21.7673	14.3368
						-26.0477	-25.2309					21.4621	13.2687
						-26.1869	-25.2959					20.9535	14.0317
						-26.3093	-25.2355					20.3431	13.9554
						-26.405	-25.054					20.0379	14.1842
						-26.4666	-24.7829					19.7328	14.1079
						-26.4853	-24.4677					18.8172	14.0317
						-26.4517	-24.1488					18.3086	13.4213
						-26.3608	-23.8482					17.6983	13.1161
						-26.2178	-23.5692					18.0034	12.8872
						-26.0408	-23.3095					16.681	12.1243
						-25.8567	-23.0759					15.6638	11.5902
						-25.693	-22.8888					14.7482	10.9036
						-25.5681	-22.774					14.3413	10.751
						-25.4861	-22.745					13.3241	10.751
						-25.4372	-22.7897					12.5103	10.6747
						-25.4047	-22.8683					11.493	10.0644
						-25.3749	-22.9265					11.5947	9.6829
						-25.3448	-22.9149					11.3913	9.53031
						-25.3232	-22.8072					11.1878	8.76737
						-25.3251	-22.6079					10.1706	9.6066
						-25.3623	-22.349					8.23781	10.0644
						-25.436	-22.0787					8.64471	10.5221
						-25.5334	-21.848					8.54299	10.0644
						-25.6327	-21.6968					8.13609	10.0644
						-25.7111	-21.6436					8.33954	9.30143
						-25.7541	-21.6796					7.93264	9.07254
						-25.7612	-21.77					8.03436	8.15702
						-25.7459	-21.8667					7.83091	8.3096
						-25.7278	-21.9275					7.83091	7.0889
						-25.722	-21.934					7.52574	6.55484
						-25.7303	-21.8973					7.62746	6.02079
						-25.7413	-21.8479					7.62746	6.09708
						-25.7381	-21.8147					7.42401	5.71561
						-25.7107	-21.8067					6.61021	6.40226
						-25.6639	-21.8082					6.40676	6.24967
						-25.6167	-21.7895					7.22056	6.70743
						-25.5923	-21.7257					6.40676	6.09708
						-25.6081	-21.6121					7.62746	6.09708
						-25.6699	-21.4688					7.01711	5.56302
						-25.7743	-21.3345					6.71193	5.8682
						-25.9141	-21.2537					8.13609	5.41043
						-26.0835	-21.2641					8.13609	6.32596
						-26.2761	-21.3892					8.23781	6.47855
						-26.4807	-21.6354					8.13609	6.40226
						-26.677	-21.9918					8.54299	6.02079
						-26.8371	-22.43					8.64471	6.70743
						-26.9322	-22.9045					9.15334	6.78373
						-26.942	-23.3578					9.66197	7.0889
						-26.8622	-23.7318					9.86542	6.86002
						-26.7052	-23.9843					10.2723	7.16519
						-26.4974	-24.1024					10.4758	7.0889
						-26.2718	-24.1058					10.4758	7.69925
						-26.0617	-24.037					10.6792	8.15702
						-25.896	-23.9425					11.3913	8.76737
						-25.7962	-23.854					12.7137	8.61478
						-25.7743	-23.777					13.6293	9.14884
						-25.8315	-23.6929					14.85	8.61478
						-25.9573	-23.5717					15.1551	9.22513
						-26.1305	-23.3904					16.2741	9.6066
						-26.3237	-23.1474					17.9017	9.91178
						-26.5089	-22.8664					18.5121	10.0644
						-26.6637	-22.5893					19.0207	10.4458
						-26.7751	-22.3595					19.4276	10.5221
						-26.839	-22.2062					19.8345	11.5139
						-26.8572	-22.1339					19.7328	11.5902
						-26.8334	-22.124					19.5293	11.3614
						-26.7693	-22.1442					19.5293	11.2088
						-26.6641	-22.1612					19.2241	11.4377
						-26.5158	-22.1503					19.5293	11.8191
						-26.3235	-22.0993					19.4276	11.8191
						-26.0906	-22.0061					18.8172	11.6665
						-25.8262	-21.8771					18.2069	12.3532
						-25.5455	-21.7245					18.8172	12.048
						-25.2681	-21.5675					18.2069	12.5821
						-25.017	-21.4315					19.3259	12.2006
						-24.8163	-21.345					17.5965	11.8191
						-24.6887	-21.3327					17.6983	11.7428
						-24.6501	-21.405					17.4948	11.1325
						-24.7049	-21.5506					17.6983	10.9799
						-24.8434	-21.734					17.8	11.1325
						-25.0427	-21.9046					17.0879	10.3695
						-25.2732	-22.0135					18.0034	10.0644
						-25.5049	-22.0324					16.4776	9.22513
						-25.7127	-21.9654					16.2741	9.53031
						-25.8774	-21.8459					16.2741	9.6829
						-25.985	-21.721					15.4603	9.6829
						-26.0258	-21.6306					15.3586	9.07254
						-25.9962	-21.5941					14.9517	9.37772
						-25.9012	-21.61					15.2569	9.53031
						-25.7578	-21.6666					13.8327	10.2932
						-25.5947	-21.7557					13.1206	9.37772
						-25.4475	-21.8785					12.4085	10.5221
						-25.3513	-22.0424					12.612	10.0644
						-25.3322	-22.2526					12.0016	10.1407
						-25.4011	-22.5029					10.7809	9.75919
						-25.5513	-22.7747					10.6792	9.53031
						-25.7598	-23.0405					11.0861	9.30143
						-25.9929	-23.2722					11.2896	9.30143
						-26.2141	-23.45					11.2896	8.76737
						-26.3933	-23.5662					11.0861	8.91996
						-26.513	-23.6259					11.2896	8.46219
						-26.5724	-23.642					10.9844	7.85184
						-26.5848	-23.628					10.7809	6.86002
						-26.571	-23.5923					10.8827	7.16519
						-26.5508	-23.5352					10.6792	6.70743
						-26.5356	-23.4508					10.8827	6.78373
						-26.5258	-23.332					10.4758	6.86002
						-26.5132	-23.176					10.1706	7.24149
						-26.4872	-22.9892					9.86542	7.47037
						-26.4411	-22.7876					8.94989	7.69925
						-26.3757	-22.5936					8.33954	7.01261
						-26.2977	-22.4295					8.54299	7.31778
						-26.2163	-22.3106					9.56024	7.47037
						-26.139	-22.2403					8.33954	7.77555
						-26.0696	-22.2091					8.94989	7.24149
						-26.0096	-22.1983					8.84816	8.08072
						-25.9604	-22.1873					9.66197	8.84366
						-25.9254	-22.1614					9.15334	8.3859
						-25.9092	-22.1167					8.94989	8.61478
						-25.915	-22.0597					8.54299	8.00443
						-25.9411	-22.0013					8.33954	7.54666
						-25.9816	-21.9496					8.13609	8.15702
						-26.0282	-21.9068					8.54299	8.08072
						-26.0739	-21.8705					8.44126	7.77555
						-26.1131	-21.8401					8.03436	7.31778
						-26.1385	-21.8209					7.93264	7.85184
						-26.1373	-21.825					8.74644	7.85184
						-26.0909	-21.8684					8.94989	8.00443
						-25.9805	-21.9661					8.54299	8.00443
						-25.7962	-22.1278					7.72919	7.24149
						-25.5455	-22.3548					8.64471	6.93631
						-25.2553	-22.6366					9.05162	7.47037
						-24.9692	-22.9489					9.86542	6.63114
						-24.7387	-23.2543					11.1878	6.55484
						-24.612	-23.5079					12.0016	6.32596
						-24.6229	-23.6687					12.4085	6.78373
						-24.7813	-23.7118					12.7137	6.63114
						-25.0686	-23.6375					12.8155	6.55484
						-25.4411	-23.473					13.4258	6.55484
						-25.8416	-23.2641					13.2224	6.93631
						-26.2154	-23.0625					14.3413	6.93631
						-26.5241	-22.9124					14.5448	7.31778
						-26.7506	-22.8422					14.7482	6.63114
						-26.8949	-22.8613					15.4603	7.47037
						-26.962	-22.9627					15.1551	7.31778
						-26.9526	-23.1265					14.7482	7.39408
						-26.8594	-23.3258					14.3413	7.62296
						-26.6737	-23.5317					14.4431	7.92813
						-26.3962	-23.72					13.2224	8.00443
						-26.0462	-23.8743					13.9344	8.61478
						-25.664	-23.9863					13.9344	8.61478
						-25.3054	-24.0521					15.1551	8.53849
						-25.0292	-24.0668					15.562	8.15702
						-24.8838	-24.0211					17.0879	8.69107
						-24.8957	-23.904					17.3931	9.45401
						-25.0638	-23.7102					17.6983	9.53031
						-25.3604	-23.4486					18.4103	9.37772
						-25.7372	-23.1468					19.1224	9.14884
						-26.1365	-22.8478					19.5293	9.6829
						-26.502	-22.6					19.7328	10.4458
						-26.7885	-22.4445					19.8345	10.217
						-26.9692	-22.4026					20.1397	10.2932
						-27.0385	-22.4681					19.9362	10.5984
						-27.0106	-22.6055					19.9362	11.6665
						-26.913	-22.7572					20.4448	11.9717
						-26.7763	-22.8606					20.1397	12.2769
						-26.6228	-22.8684					19.4276	11.9717
						-26.4604	-22.7677					18.0034	11.7428
						-26.2841	-22.5855					16.3758	12.5058
						-26.0847	-22.3779					16.5793	11.7428
						-25.8605	-22.2076					16.5793	12.1243
						-25.6244	-22.1172					17.4948	11.2851
						-25.4028	-22.113					17.0879	10.9799
						-25.2266	-22.1633					17.3931	10.9799
						-25.1187	-22.213					18.1052	10.6747
						-25.0867	-22.2076					18.5121	10.2932
						-25.1219	-22.1165					17.8	10.0644
						-25.2052	-21.9451					18.0034	10.8273
						-25.3155	-21.731					16.8845	10.3695
						-25.4355	-21.5268					15.9689	10.217
						-25.554	-21.3776					15.8672	9.6829
						-25.6662	-21.3053					15.562	10.751
						-25.7723	-21.3061					14.6465	10.5221
						-25.8761	-21.3592					14.4431	10.2932
						-25.9825	-21.4416					14.3413	10.217
						-26.0937	-21.5394					13.3241	10.5984
						-26.2044	-21.6539					12.0016	10.0644
						-26.2996	-21.8005					11.2896	9.98807
						-26.358	-22.0014					11.2896	8.91996
						-26.3596	-22.2728					12.3068	8.46219
						-26.2962	-22.6106					12.5103	7.47037
						-26.1783	-22.9798					12.0016	7.85184
						-26.0353	-23.3167					13.0189	7.77555
						-25.9084	-23.5455					12.1034	8.23331
						-25.8381	-23.604					12.2051	7.69925
						-25.8525	-23.4677					11.7982	7.0889
						-25.9598	-23.1584					11.6965	8.53849
						-26.1471	-22.7352					11.0861	8.46219
						-26.3842	-22.2722					10.7809	7.69925
						-26.6316	-21.8364					10.2723	8.61478
						-26.8476	-21.4744					9.76369	8.76737
						-26.9954	-21.212					9.96714	8.69107
						-27.0486	-21.0578					9.96714	8.69107
						-26.996	-21.007					10.2723	8.76737
						-26.8459	-21.0419					10.2723	8.76737
						-26.6257	-21.1325					9.96714	8.53849
						-26.3766	-21.2415					8.74644	8.00443
						-26.1424	-21.336					9.05162	7.77555
						-25.9562	-21.3994					9.76369	6.63114
						-25.8319	-21.4388					10.374	6.78373
						-25.7647	-21.4821					10.7809	5.63932
						-25.7391	-21.5647					10.8827	6.47855
						-25.74	-21.7103					11.5947	6.17337
						-25.7606	-21.9156					11.8999	6.70743
						-25.8045	-22.1456					12.3068	6.32596
						-25.8818	-22.3425					12.612	7.01261
						-26.003	-22.4473					12.4085	6.86002
						-26.1714	-22.4215					13.0189	7.16519
						-26.3769	-22.2626					12.9172	7.39408
						-26.5922	-22.0063					12.4085	8.23331
						-26.7736	-21.7142					12.8155	8.3096
						-26.8699	-21.4546					12.1034	9.07254
						-26.8377	-21.2808					12.1034	8.91996
						-26.658	-21.2188					12.8155	9.30143
						-26.347	-21.2663					12.7137	9.22513
						-25.955	-21.4037					12.0016	9.37772
						-25.5529	-21.6098					11.8999	8.76737
						-25.2117	-21.8736					13.2224	8.53849
						-24.9832	-22.1959					14.3413	7.92813
						-24.889	-22.5813					15.7655	8.3859
						-24.9206	-23.028					15.9689	8.3096
						-25.0501	-23.5198					16.9862	9.6066
						-25.2457	-24.0246					17.3931	9.14884
						-25.4837	-24.4987					18.0034	9.98807
						-25.7528	-24.8943					18.2069	10.0644
						-26.0492	-25.1684					18.0034	11.5902
						-26.3658	-25.2928					18.8172	10.2932
						-26.683	-25.2615					18.7155	11.2088
						-26.9675	-25.0955					18.7155	11.4377
						-27.1777	-24.8386					19.2241	11.2851
						-27.2758	-24.5471					19.5293	11.5902
						-27.2375	-24.2738					19.7328	11.4377
						-27.0587	-24.0539					19.7328	11.4377
						-26.7551	-23.8983					19.631	11.9717
						-26.359	-23.7942					18.4103	11.4377
						-25.9131	-23.7124					17.8	11.7428
						-25.4635	-23.6173					16.681	11.7428
						-25.0534	-23.478					17.2914	11.2851
						-24.7181	-23.2788					17.8	10.4458
						-24.4828	-23.0273					17.2914	11.1325
						-24.3618	-22.7539					17.6983	10.6747
						-24.3594	-22.5011					17.2914	10.9036
						-24.4713	-22.3039					17.0879	9.91178
						-24.6857	-22.1696					18.0034	9.45401
						-24.985	-22.0688					17.5965	8.53849
						-25.3481	-21.9434					17.1896	8.61478
						-25.7518	-21.7304					16.8845	9.14884
						-26.1709	-21.3928					16.8845	9.45401
						-26.5767	-20.943					16.2741	9.30143
						-26.9359	-20.4471					16.5793	9.75919
						-27.2113	-20.0056					16.1724	9.83548
						-27.3684	-19.7188					15.4603	10.217
						-27.3838	-19.6521					15.4603	10.2932
						-27.2541	-19.8159					13.731	10.4458
						-26.9987	-20.1676					12.612	10.2932
						-26.6549	-20.6309					12.5103	11.1325
						-26.2667	-21.1204					12.2051	9.83548
						-25.8738	-21.5603					12.5103	10.1407
						-25.5062	-21.8939					12.9172	9.98807
						-25.1856	-22.0857					13.1206	10.217
						-24.9321	-22.123					13.3241	10.6747
						-24.7692	-22.0166					13.2224	11.2851
						-24.7237	-21.8023					14.0362	11.0562
						-24.8182	-21.5363					14.0362	11.2851
						-25.0612	-21.2859					14.4431	11.3614
						-25.4378	-21.1168					14.3413	11.2851
						-25.9066	-21.0819					14.3413	11.4377
						-26.4044	-21.2145					14.3413	12.2006
						-26.8583	-21.5251					14.85	11.8191
						-27.2021	-21.9991					14.6465	12.8872
						-27.3931	-22.5944					14.3413	11.5902
						-27.4217	-23.2428					14.5448	12.3532
						-27.3111	-23.8571					14.0362	11.8191
						-27.1065	-24.3475					12.5103	11.9717
						-26.8589	-24.6417					12.2051	11.2851
						-26.61	-24.7015					12.7137	10.6747
						-26.3848	-24.5308					12.5103	10.0644
						-26.1927	-24.1722					13.6293	10.3695
						-26.0344	-23.6946					13.6293	9.83548
						-25.9107	-23.1755					13.5275	9.53031
						-25.8271	-22.6824					12.9172	9.07254
						-25.7933	-22.2569					13.2224	8.69107
						-25.8188	-21.9072					13.5275	8.3096
						-25.9064	-21.6116					13.3241	8.69107
						-26.0469	-21.3332					13.2224	8.91996
						-26.2181	-21.0409					13.1206	9.45401
						-26.3866	-20.7282					13.4258	9.07254
						-26.5145	-20.4205					13.5275	8.46219
						-26.5682	-20.1689					13.4258	7.24149
						-26.527	-20.0314					12.8155	7.01261
						-26.3896	-20.0498					12.2051	6.63114
						-26.1749	-20.2331					12.1034	6.86002
						-25.9165	-20.553					11.6965	6.02079
						-25.6536	-20.9546					10.7809	6.17337
						-25.4201	-21.3754					10.5775	5.25785
						-25.2389	-21.7635					10.1706	5.33414
						-25.1203	-22.0872					10.374	5.25785
						-25.0646	-22.336					10.2723	5.71561
						-25.0653	-22.5146					10.1706	5.25785
						-25.1111	-22.6357					10.8827	5.94449
						-25.1886	-22.7135					11.5947	4.95267
						-25.285	-22.7582					11.8999	4.95267
						-25.3934	-22.7732					12.2051	4.80008
						-25.5157	-22.7557					13.1206	5.18155
						-25.662	-22.7021					13.3241	5.33414
						-25.8418	-22.616					13.2224	5.71561
						-26.0538	-22.5147					13.9344	5.7919
						-26.2768	-22.4304					14.4431	6.40226
						-26.4707	-22.4028					14.3413	6.24967
						-26.5867	-22.4672					14.3413	6.17337
						-26.5835	-22.6414					13.3241	6.09708
						-26.4414	-22.9184					14.0362	6.70743
						-26.1691	-23.2675					13.9344	6.24967
						-25.8	-23.6444					14.3413	6.47855
						-25.3838	-24.004					13.9344	6.32596
						-24.9767	-24.3107					13.4258	6.63114
						-24.633	-24.5427					14.6465	6.24967
						-24.4004	-24.6906					15.1551	6.78373
						-24.3139	-24.7542					15.562	6.17337
						-24.3917	-24.7403					15.6638	7.0889
						-24.6304	-24.6609					15.7655	5.7919
						-25.0065	-24.5314					16.2741	5.7919
						-25.4814	-24.3656					16.0707	6.55484
						-26.0084	-24.172					15.7655	8.00443
						-26.5391	-23.9502					16.3758	7.77555
						-27.0264	-23.6933					16.5793	8.61478
						-27.4263	-23.395					17.2914	8.91996
						-27.7011	-23.0592					17.1896	8.84366
						-27.8244	-22.7063					18.3086	8.76737
						-27.7872	-22.3703					16.9862	9.53031
						-27.6011	-22.0868					17.8	9.45401
						-27.2971	-21.8758					17.1896	8.3096
						-26.9197	-21.7297					16.7827	7.77555
						-26.5183	-21.6151					17.0879	8.61478
						-26.1387	-21.4887					16.0707	8.76737
						-25.8165	-21.3191					16.681	8.91996
						-25.5741	-21.1006					17.2914	8.53849
						-25.4206	-20.8544					16.4776	9.14884
						-25.3549	-20.6164					16.8845	8.61478
						-25.3695	-20.4218					17.0879	9.37772
						-25.4541	-20.2955					16.4776	7.77555
						-25.5979	-20.2516					16.5793	8.69107
						-25.7891	-20.2974					16.0707	9.45401
						-26.0131	-20.4381					15.4603	10.4458
						-26.2515	-20.6739					15.0534	10.3695
						-26.4811	-20.9934					14.7482	10.9799
						-26.6763	-21.3669					14.4431	9.98807
						-26.8132	-21.7473					13.0189	10.217
						-26.873	-22.0799					13.0189	9.6829
						-26.845	-22.3175					13.5275	9.6829
						-26.7265	-22.4335					12.4085	8.69107
						-26.5236	-22.4274					12.9172	8.46219
						-26.2498	-22.3199					12.8155	8.84366
						-25.9267	-22.1458					13.1206	8.53849
						-25.5825	-21.9474					13.3241	8.3859
						-25.2492	-21.771					13.731	8.3859
						-24.9589	-21.6633					13.9344	8.61478
						-24.7406	-21.6653					14.5448	9.07254
						-24.618	-21.8002					14.85	8.3859
						-24.6076	-22.0641					14.4431	8.23331
						-24.7166	-22.4224					14.4431	8.15702
						-24.9402	-22.8174					13.6293	8.53849
						-25.2596	-23.1847					13.6293	9.30143
						-25.6415	-23.4717					12.4085	9.07254
						-26.0404	-23.6504					12.1034	8.99625
						-26.4032	-23.7208					11.2896	9.14884
						-26.6782	-23.7054					10.5775	8.84366
						-26.8256	-23.6385					10.6792	8.69107
						-26.8275	-23.5556					11.1878	8.23331
						-26.6931	-23.4851					10.9844	7.85184
						-26.4568	-23.444					10.9844	7.47037
						-26.1682	-23.4364					12.0016	7.47037
						-25.8798	-23.4554					12.2051	7.01261
						-25.6347	-23.487					12.1034	7.24149
						-25.4592	-23.5148					12.7137	6.40226
						-25.3621	-23.5228					12.612	6.40226
						-25.3373	-23.4973					13.1206	5.7919
						-25.3707	-23.4273					13.4258	5.63932
						-25.4468	-23.3045					12.7137	4.26603
						-25.5552	-23.1249					13.0189	4.64749
						-25.6935	-22.889					12.7137	4.87638
						-25.8655	-22.6039					13.0189	5.56302
						-26.073	-22.2825					12.0016	6.02079
						-26.3051	-21.9444					12.3068	5.63932
						-26.5312	-21.6134					11.6965	6.09708
						-26.7038	-21.3144					11.2896	5.94449
						-26.7743	-21.0694					12.4085	5.63932
						-26.7123	-20.895					12.9172	6.17337
						-26.5214	-20.8011					12.1034	5.41043
						-26.2412	-20.7915					12.4085	5.8682
						-25.9357	-20.8641					12.612	5.7919
						-25.6732	-21.0103					13.0189	6.32596
						-25.5069	-21.2144					12.8155	6.32596
						-25.4632	-21.4547					13.2224	6.55484
						-25.5397	-21.7035					13.5275	7.0889
						-25.7116	-21.9301					14.0362	7.01261
						-25.9419	-22.1036					14.5448	6.78373
						-26.1914	-22.1988					14.2396	5.71561
						-26.4266	-22.2022					14.5448	6.09708
						-26.6235	-22.1159					14.85	6.93631
						-26.7691	-21.9555					15.2569	7.47037
						-26.8589	-21.7445					15.2569	7.92813
						-26.8929	-21.5097					15.0534	7.69925
						-26.8703	-21.2822					14.4431	8.3859
						-26.7874	-21.1027					15.1551	7.69925
						-26.6387	-21.0246					15.7655	8.15702
						-26.4223	-21.1055					16.3758	8.3859
						-26.1452	-21.3873					15.1551	8.15702
						-25.8264	-21.8732					15.6638	8.08072
						-25.4952	-22.5147					15.562	8.69107
						-25.1864	-23.2196					15.1551	8.99625
						-24.9351	-23.8792					15.2569	9.6829
						-24.772	-24.4025					15.2569	9.45401
						-24.7202	-24.7409					14.85	10.1407
						-24.79	-24.8919					15.1551	9.75919
						-24.9759	-24.885					15.2569	9.53031
						-25.2557	-24.7579					15.0534	9.30143
						-25.595	-24.5394					14.9517	9.6066
						-25.9564	-24.2448					14.6465	9.22513
						-26.3079	-23.884					14.6465	10.0644
						-26.6273	-23.4733					14.4431	10.3695
						-26.899	-23.0432					14.1379	11.2851
						-27.1087	-22.6361					13.2224	10.5984
						-27.24	-22.2968					13.9344	11.3614
						-27.2759	-22.0605					14.3413	10.9036
						-27.2057	-21.9415					14.7482	10.6747
						-27.0311	-21.9271					13.9344	9.45401
						-26.7694	-21.9785					14.1379	9.6066
						-26.4498	-22.0405					14.6465	9.22513
						-26.1077	-22.0616					15.3586	9.98807
						-25.7766	-22.015					15.1551	9.53031
						-25.4834	-21.9125					14.3413	9.6829
						-25.2464	-21.8019					15.7655	9.83548
						-25.0763	-21.7451					16.3758	10.3695
						-24.978	-21.7891					16.9862	10.2932
						-24.952	-21.9427					16.5793	9.37772
						-24.994	-22.1711					17.4948	9.45401
						-25.0942	-22.4091					17.3931	10.5984
						-25.2393	-22.5846					17.6983	10.4458
						-25.4162	-22.643					17.0879	10.6747
						-25.6159	-22.5629					16.5793	10.2932
						-25.8324	-22.3597					16.1724	10.1407
						-26.0569	-22.0782					16.0707	10.217
						-26.2716	-21.7784					16.0707	10.751
						-26.4474	-21.518					15.9689	10.5221
						-26.5509	-21.3365					14.9517	10.2932
						-26.557	-21.2468					15.0534	10.5984
						-26.4606	-21.2378					15.4603	11.3614
						-26.2792	-21.2873					16.0707	10.751
						-26.0458	-21.3805					16.1724	11.2851
						-25.7951	-21.521					15.7655	10.6747
						-25.5518	-21.7281					16.0707	10.9036
						-25.3269	-22.0201					16.9862	10.0644
						-25.1224	-22.395					16.7827	10.217
						-24.9412	-22.8196					17.2914	8.76737
						-24.7945	-23.2335					16.9862	7.62296
						-24.703	-23.5672					16.7827	8.08072
						-24.692	-23.7628					16.4776	8.53849
						-24.7806	-23.7901					15.3586	9.53031
						-24.9716	-23.6527					13.731	9.14884
						-25.2449	-23.3838					13.3241	9.14884
						-25.5591	-23.0353					13.4258	9.45401
						-25.8611	-22.6651					12.5103	8.76737
						-26.101	-22.3259					11.493	8.3859
						-26.2456	-22.0565					11.493	7.92813
						-26.286	-21.8781					10.8827	8.15702
						-26.2361	-21.7937					10.7809	7.77555
						-26.1255	-21.7934					11.7982	7.77555
						-25.9891	-21.8603					11.2896	7.01261
						-25.8578	-21.9768					11.7982	7.16519
						-25.7519	-22.1264					11.2896	7.16519
						-25.6785	-22.2909					11.5947	6.70743
						-25.6322	-22.4466					12.4085	6.47855
						-25.601	-22.5632					12.3068	5.94449
						-25.5748	-22.6093					12.612	4.80008
						-25.5545	-22.5607					12.8155	4.95267
						-25.5552	-22.4088					12.4085	5.02896
						-25.6011	-22.1643					12.4085	6.09708
						-25.7134	-21.8538					11.1878	5.25785
						-25.896	-21.5145					11.6965	5.94449
						-26.1285	-21.1873					11.6965	5.63932
						-26.3693	-20.9109					11.2896	6.55484
						-26.5681	-20.7164					11.3913	5.71561
						-26.6823	-20.6208					11.6965	5.02896
						-26.6892	-20.6214					10.8827	5.71561
						-26.5907	-20.6953					11.0861	7.0889
						-26.4099	-20.8078					11.5947	7.47037
						-26.184	-20.9269					12.5103	8.08072
						-25.9563	-21.0396					12.9172	8.61478
						-25.7685	-21.1579					12.8155	9.37772
						-25.6532	-21.3117					13.731	9.22513
						-25.6272	-21.53					14.3413	9.30143
						-25.6883	-21.8209					14.85	9.14884
						-25.8172	-22.1619					15.0534	7.77555
						-25.986	-22.5045					15.6638	7.54666
						-26.1704	-22.7911					15.4603	8.23331
						-26.3588	-22.9753					15.1551	8.08072
						-26.5534	-23.0366					15.9689	9.07254
						-26.7627	-22.9868					15.6638	9.30143
						-26.9883	-22.8652					16.2741	9.75919
						-27.2134	-22.7273					16.3758	9.53031
						-27.401	-22.6286					16.0707	9.83548
						-27.5032	-22.6086					15.8672	9.30143
						-27.4792	-22.6801					15.7655	10.3695
						-27.313	-22.8273					15.0534	10.0644
						-27.0217	-23.0143					15.8672	9.83548
						-26.6506	-23.2011					15.4603	9.83548
						-26.2576	-23.357					16.0707	10.0644
						-25.895	-23.4671					15.3586	10.751
						-25.5969	-23.5286					14.2396	10.5984
						-25.3755	-23.5432					15.4603	10.0644
						-25.2267	-23.5122					15.8672	10.8273
						-25.1398	-23.4379					16.2741	9.45401
						-25.107	-23.3274					16.5793	9.37772
						-25.1287	-23.1937					16.8845	10.1407
						-25.2112	-23.0517					16.4776	11.2088
						-25.3606	-22.9113					17.3931	10.9799
						-25.5748	-22.7746					17.5965	11.2088
						-25.8392	-22.6407					18.2069	11.2088
						-26.1275	-22.5137					17.6983	11.2088
						-26.4057	-22.4093					18.4103	10.9799
						-26.6371	-22.3503					18.2069	11.5139
						-26.7881	-22.3547					16.9862	11.2088
						-26.8347	-22.4222					17.3931	11.5902
						-26.7682	-22.5313					16.4776	11.8191
						-26.599	-22.6487					16.4776	11.6665
						-26.3556	-22.7463					16.9862	11.4377
						-26.0772	-22.8146					16.681	11.1325
						-25.8037	-22.8642					16.4776	10.9036
						-25.566	-22.9164					16.8845	11.3614
						-25.3809	-22.9896					16.8845	10.2932
						-25.252	-23.0908					17.5965	9.37772
						-25.174	-23.2151					17.4948	7.69925
						-25.1395	-23.3527					17.2914	8.46219
						-25.1429	-23.4953					15.9689	8.84366
						-25.1826	-23.6376					16.3758	9.22513
						-25.2596	-23.7714					16.1724	9.30143
						-25.3728	-23.8793					16.3758	9.6066
						-25.5145	-23.9329					15.8672	9.91178
						-25.6672	-23.9005					15.562	10.1407
						-25.8051	-23.7608					15.4603	9.6829
						-25.9	-23.5155					14.2396	9.6066
						-25.9303	-23.1933					13.2224	9.83548
						-25.8881	-22.845					11.8999	9.98807
						-25.7831	-22.5314					12.1034	9.91178
						-25.6408	-22.3088					11.493	9.83548
						-25.4967	-22.2162					9.96714	9.45401
						-25.3875	-22.266					9.76369	8.61478
						-25.3415	-22.4423					9.86542	7.77555
						-25.3707	-22.7072					9.76369	7.92813
						-25.4677	-23.016					9.96714	6.55484
						-25.6074	-23.3322					9.56024	6.02079
						-25.7551	-23.6362					9.15334	5.71561
						-25.8784	-23.9227					9.15334	6.09708
						-25.959	-24.1891					9.66197	6.24967
						-26.0005	-24.4249					9.86542	6.40226
						-26.0267	-24.6088					10.4758	6.17337
						-26.0704	-24.7163					10.7809	7.24149
						-26.1552	-24.733					10.9844	6.55484
						-26.2807	-24.6629					11.7982	6.17337
						-26.417	-24.5265					11.6965	6.47855
						-26.5161	-24.349					11.6965	6.70743
						-26.5323	-24.1455					11.5947	6.63114
						-26.4438	-23.9145					11.493	6.70743
						-26.263	-23.6431					12.2051	6.47855
						-26.0318	-23.3199					11.5947	6.70743
						-25.8046	-22.948					10.9844	7.01261
						-25.6279	-22.5486					11.3913	7.54666
						-25.527	-22.1563					12.3068	7.0889
						-25.503	-21.8084					11.8999	7.24149
						-25.5405	-21.5353					11.7982	5.63932
						-25.6181	-21.3554					10.8827	6.63114
						-25.7187	-21.2721					11.6965	7.0889
						-25.8332	-21.2733					12.1034	8.15702
						-25.9588	-21.3325					11.6965	8.3096
						-26.0941	-21.4131					12.2051	9.37772
						-26.2335	-21.4779					12.3068	9.07254
						-26.3642	-21.5011					12.9172	9.91178
						-26.4678	-21.4777					12.9172	9.6066
						-26.5244	-21.4259					13.1206	9.6829
						-26.5175	-21.3786					13.1206	9.83548
						-26.4364	-21.3688					12.9172	10.4458
						-26.2761	-21.4156					13.1206	10.8273
						-26.0363	-21.5196					13.8327	11.2088
						-25.7217	-21.6686					13.6293	10.9799
						-25.3464	-21.8489					12.9172	11.2851
						-24.9371	-22.0533					13.3241	10.5984
						-24.5352	-22.28					14.1379	10.4458
						-24.1919	-22.5234					13.3241	10.5984
						-23.9584	-22.7656					13.6293	9.30143
						-23.8737	-22.975					12.612	7.92813
						-23.9543	-23.1162					13.9344	8.61478
						-24.192	-23.165					14.4431	8.76737
						-24.5572	-23.1208					14.9517	9.30143
						-25.0084	-23.0109					15.1551	9.37772
						-25.5014	-22.8828					15.562	9.6066
						-25.9955	-22.7884					15.7655	9.98807
						-26.4543	-22.7675					16.0707	10.3695
						-26.8427	-22.8355					15.8672	9.45401
						-27.1257	-22.9811					16.1724	9.91178
						-27.2714	-23.1719					15.1551	10.0644
						-27.2595	-23.3635					14.7482	10.6747
						-27.0912	-23.5107					16.2741	10.0644
						-26.7946	-23.5747					16.5793	10.6747
						-26.4219	-23.5303					16.0707	10.1407
						-26.0373	-23.3705					15.562	11.1325
						-25.7	-23.1088					16.4776	10.6747
						-25.4488	-22.7786					16.2741	10.5221
						-25.2953	-22.4275					16.2741	9.22513
						-25.2275	-22.106					14.9517	8.15702
						-25.222	-21.8552					14.9517	8.08072
						-25.2589	-21.6959					15.1551	8.3859
						-25.3322	-21.6246					14.4431	7.85184
						-25.4516	-21.6176					13.3241	9.53031
						-25.6345	-21.6409					14.0362	9.6066
						-25.8922	-21.6621					13.1206	10.4458
						-26.2161	-21.6596					13.731	10.9036
						-26.5714	-21.6245					13.731	10.4458
						-26.9025	-21.5569					13.6293	10.217
						-27.1475	-21.4602					12.5103	10.5984
						-27.2575	-21.3384					12.2051	10.1407
						-27.2114	-21.1959					13.0189	10.0644
						-27.0205	-21.0416					12.9172	9.75919
						-26.722	-20.8905					12.8155	10.1407
						-26.3646	-20.7639					12.2051	9.6066
						-25.9926	-20.6869					11.8999	9.6066
						-25.6362	-20.6872					12.2051	8.91996
						-25.3111	-20.7915					12.2051	8.08072
						-25.0266	-21.0202					11.0861	7.62296
						-24.7963	-21.3778					10.6792	7.0889
						-24.6434	-21.8435					10.7809	6.55484
						-24.5974	-22.3683					10.8827	6.86002
						-24.6822	-22.8819					11.3913	6.32596
						-24.9016	-23.3114					11.6965	5.94449
						-25.2304	-23.6029					11.8999	5.94449
						-25.6155	-23.7378					12.0016	6.55484
						-25.9878	-23.7368					12.5103	6.55484
						-26.281	-23.6476					12.3068	7.0889
						-26.4492	-23.5238					11.5947	6.24967
						-26.477	-23.4041					11.2896	6.40226
						-26.3782	-23.3041					11.1878	6.32596
						-26.1855	-23.2228					11.1878	6.93631
						-25.9362	-23.1596					11.1878	6.47855
						-25.6634	-23.1283					10.4758	6.40226
						-25.3949	-23.1588					10.5775	6.32596
						-25.157	-23.2856					10.7809	6.78373
						-24.9778	-23.53					10.8827	6.40226
						-24.8845	-23.886					9.76369	6.55484
						-24.8958	-24.3173					10.2723	5.48673
						-25.0144	-24.766					11.3913	5.63932
						-25.2253	-25.1682					11.5947	5.71561
						-25.501	-25.4703					12.4085	6.70743
						-25.8101	-25.6392					12.7137	7.16519
						-26.1228	-25.6646					13.0189	7.54666
						-26.4118	-25.5536					12.8155	7.0889
						-26.6487	-25.3219					12.9172	7.69925
						-26.8029	-24.9849					12.612	8.00443
						-26.8472	-24.5543					12.7137	8.91996
						-26.768	-24.0395					12.3068	9.14884
						-26.5764	-23.4546					12.0016	10.1407
						-26.3103	-22.8273					12.9172	10.751
						-26.0257	-22.2025					13.1206	11.8191
						-25.7791	-21.6385					12.612	12.2006
						-25.61	-21.195					12.8155	12.3532
						-25.5305	-20.9175					13.8327	12.3532
						-25.5274	-20.8243					13.731	12.8872
						-25.5735	-20.9009					13.8327	12.048
						-25.6439	-21.1039					12.5103	11.9717
						-25.7273	-21.3728					13.0189	11.2088
						-25.8289	-21.6468					13.4258	11.0562
						-25.9634	-21.8829					13.4258	10.8273
						-26.1414	-22.0663					13.731	11.2851
						-26.3564	-22.2104					13.731	10.5984
						-26.5804	-22.3434					14.2396	11.4377
						-26.7696	-22.4871					14.3413	10.9036
						-26.879	-22.6388					15.0534	10.751
						-26.8788	-22.7656					15.7655	10.3695
						-26.7643	-22.8172					15.8672	11.5139
						-26.5553	-22.7502					15.562	11.7428
						-26.2865	-22.5515					16.681	12.1243
						-25.9958	-22.2472					16.9862	11.6665
						-25.7143	-21.8938					17.5965	12.7347
						-25.463	-21.5571					16.8845	12.3532
						-25.2531	-21.2917					17.4948	12.2769
						-25.0881	-21.1319					17.1896	11.8191
						-24.9658	-21.0938					17.3931	11.2851
						-24.8807	-21.1832					16.1724	10.751
						-24.827	-21.4012					15.7655	10.1407
						-24.8022	-21.7417					15.6638	8.76737
						-24.8097	-22.1839					16.4776	8.91996
						-24.8573	-22.687					16.681	8.84366
						-24.9544	-23.192					15.9689	9.6829
						-25.1054	-23.6312					15.562	9.14884
						-25.3047	-23.9431					15.6638	8.99625
						-25.5342	-24.0848					15.562	8.69107
						-25.7675	-24.0391					15.6638	8.61478
						-25.9767	-23.8154					14.7482	7.69925
						-26.1412	-23.4458					14.0362	7.54666
						-26.2537	-22.9784					13.1206	7.24149
						-26.3201	-22.4712					13.5275	8.08072
						-26.3555	-21.9849					13.4258	7.54666
						-26.3766	-21.5764					13.6293	7.77555
						-26.3949	-21.2895					13.0189	7.0889
						-26.4115	-21.1471					13.4258	7.85184
						-26.4173	-21.1477					13.6293	7.69925
						-26.3975	-21.2688					13.6293	7.92813
						-26.3405	-21.4763					12.7137	7.31778
						-26.2473	-21.7348					12.1034	7.16519
						-26.1369	-22.0132					12.1034	6.47855
						-26.0435	-22.2846					11.3913	7.62296
						-26.0069	-22.5236					11.0861	7.39408
						-26.0589	-22.7055					10.5775	7.92813
						-26.2119	-22.8078					10.0689	7.77555
						-26.4519	-22.8149					9.35679	8.15702
						-26.7407	-22.7213					9.76369	7.24149
						-27.0229	-22.5346					9.56024	8.3859
						-27.2386	-22.2758					9.56024	8.69107
						-27.3359	-21.9789					10.1706	8.53849
						-27.2831	-21.6855					11.2896	7.92813
						-27.0757	-21.4372					11.8999	9.07254
						-26.7383	-21.2657					12.5103	9.22513
						-26.3175	-21.1856					12.0016	9.53031
						-25.8702	-21.1944					12.9172	9.45401
						-25.4493	-21.2799					13.731	9.45401
						-25.0929	-21.4329					14.0362	9.53031
						-24.8216	-21.6559					13.731	9.07254
						-24.6419	-21.9642					14.1379	8.69107
						-24.5539	-22.3759					15.0534	8.08072
						-24.5555	-22.8958					15.6638	8.61478
						-24.6431	-23.5029					15.4603	8.99625
						-24.8063	-24.1461					15.4603	9.37772
						-25.0243	-24.752					15.8672	10.0644
						-25.2654	-25.2414					16.1724	10.4458
						-25.4934	-25.5479					16.2741	10.3695
						-25.6779	-25.6348					15.8672	10.6747
						-25.8031	-25.5052					15.2569	11.7428
						-25.8702	-25.2026					15.6638	11.6665
						-25.8926	-24.8022					15.7655	12.7347
						-25.8865	-24.3916					15.7655	11.5139
						-25.8613	-24.0468					14.7482	11.8954
						-25.816	-23.8121					13.6293	11.5902
						-25.7415	-23.6906					12.8155	11.9717
						-25.6277	-23.651					13.3241	11.8954
						-25.4734	-23.6466					12.8155	11.7428
						-25.2921	-23.636					13.2224	11.4377
						-25.1127	-23.5969					12.1034	11.3614
						-24.9735	-23.5272					12.9172	9.91178
						-24.9112	-23.4395					13.2224	11.0562
						-24.9515	-23.3532					13.6293	11.5902
						-25.1021	-23.287					13.6293	11.4377
						-25.3512	-23.2526					13.4258	11.4377
						-25.6707	-23.2455					14.0362	11.5139
						-26.021	-23.2389					13.4258	10.5984
						-26.3581	-23.1855					13.4258	11.0562
						-26.6425	-23.0339					13.0189	10.4458
						-26.8478	-22.7541					13.0189	10.751
						-26.9663	-22.3584					13.8327	11.1325
						-27.0083	-21.906					14.2396	10.6747
						-26.995	-21.483					14.5448	10.1407
						-26.9485	-21.1699					15.2569	9.45401
						-26.884	-21.0111					14.4431	9.45401
						-26.8049	-21.0042					14.85	9.83548
						-26.7062	-21.1107					15.562	9.75919
						-26.5796	-21.2815					15.3586	10.6747
						-26.422	-21.4782					14.85	9.37772
						-26.2413	-21.6826					14.2396	9.22513
						-26.0572	-21.8915					14.6465	9.6829
						-25.8975	-22.105					14.4431	10.6747
						-25.7892	-22.3193					14.4431	10.9799
						-25.7494	-22.525					14.6465	11.1325
						-25.7785	-22.7117					14.85	10.9036
						-25.8596	-22.87					14.85	10.5984
						-25.9637	-22.9932					15.4603	10.5984
						-26.0581	-23.0782					14.6465	10.8273
						-26.1138	-23.13					14.2396	10.0644
						-26.1098	-23.1672					14.9517	10.0644
						-26.0344	-23.2227					15.562	10.217
						-25.8851	-23.3358					15.3586	10.6747
						-25.6683	-23.5365					15.562	10.0644
						-25.3998	-23.8313					14.85	10.3695
						-25.1049	-24.1984					15.0534	9.45401
						-24.8144	-24.5936					14.7482	10.217
						-24.559	-24.9646					14.0362	10.217
						-24.3607	-25.264					13.2224	9.75919
						-24.2278	-25.4582					12.7137	9.30143
						-24.1557	-25.5308					12.612	9.14884
						-24.135	-25.4814					12.4085	9.53031
						-24.1603	-25.3245					12.2051	9.6066
						-24.2366	-25.0852					11.8999	9.6066
						-24.3752	-24.794					11.7982	9.83548
						-24.5848	-24.4801					12.2051	9.07254
						-24.8616	-24.1648					12.2051	9.53031
						-25.1849	-23.8588					12.0016	9.6829
						-25.5216	-23.5635					11.7982	10.0644
						-25.8345	-23.2776					12.5103	9.53031
						-26.0917	-23.0034					12.9172	9.91178
						-26.2708	-22.7527					13.3241	9.45401
						-26.3605	-22.5466					13.1206	9.07254
						-26.3582	-22.4106					12.4085	9.14884
						-26.2701	-22.3659					12.8155	9.14884
						-26.1119	-22.4202					12.9172	8.53849
						-25.911	-22.5629					12.8155	7.85184
						-25.7051	-22.7659					13.3241	7.85184
						-25.537	-22.9928					13.1206	7.31778
						-25.4455	-23.2101					13.6293	7.0889
						-25.4566	-23.3962					14.1379	7.24149
						-25.5774	-23.5406					14.7482	7.69925
						-25.7964	-23.6355					14.85	8.23331
						-26.0871	-23.6643					14.6465	8.46219
						-26.4145	-23.5989					14.6465	8.61478
						-26.7396	-23.4096					14.7482	9.22513
						-27.0244	-23.0837					14.1379	9.6066
						-27.2349	-22.6431					13.731	10.3695
						-27.3453	-22.147					13.6293	10.5984
						-27.3413	-21.6799					13.8327	9.6066
						-27.222	-21.33					13.4258	10.4458
						-26.999	-21.1691					13.1206	10.6747
						-26.6932	-21.2406					12.7137	10.9036
						-26.3301	-21.5544					11.8999	10.5221
						-25.9366	-22.0853					12.1034	10.8273
						-25.5402	-22.7743					11.493	11.4377
						-25.168	-23.5349					11.3913	11.6665
						-24.8475	-24.2678					12.4085	10.5221
						-24.6042	-24.8808					12.0016	10.8273
						-24.4584	-25.3092					11.8999	10.1407
						-24.4206	-25.5278					12.0016	10.751
						-24.4868	-25.55					12.3068	10.5984
						-24.637	-25.4173					12.3068	11.0562
						-24.8374	-25.1806					12.2051	10.5221
						-25.0492	-24.881					13.2224	11.1325
						-25.2386	-24.5368					11.8999	11.4377
						-25.3859	-24.1402					12.0016	10.9799
						-25.4872	-23.6684					12.0016	10.217
						-25.5495	-23.1051					12.7137	10.1407
						-25.5822	-22.461					13.4258	9.75919
						-25.5909	-21.7857					13.2224	9.98807
						-25.5757	-21.1588					13.731	9.14884
						-25.5345	-20.6663					14.1379	9.45401
						-25.4677	-20.3692					13.8327	8.91996
						-25.382	-20.2813					13.0189	9.07254
						-25.2909	-20.366					13.731	8.53849
						-25.2137	-20.5538					14.1379	8.76737
						-25.1716	-20.7735					14.3413	8.00443
						-25.1825	-20.9792					15.0534	8.69107
						-25.2568	-21.1626					14.7482	7.92813
						-25.3938	-21.3422					15.1551	7.62296
						-25.5825	-21.539					15.2569	8.53849
						-25.8051	-21.7514					15.1551	9.37772
						-26.0409	-21.9455					15.562	9.6829
						-26.2696	-22.0668					15.562	9.98807
						-26.4724	-22.0647					14.5448	10.5221
						-26.6332	-21.9183					15.1551	9.98807
						-26.7407	-21.6483					15.3586	9.6829
						-26.791	-21.3096					15.2569	9.91178
						-26.788	-20.9719					15.2569	9.53031
						-26.7414	-20.696					14.4431	9.91178
						-26.6631	-20.5185					14.0362	9.53031
						-26.5642	-20.4488					13.2224	10.0644
						-26.4531	-20.4782					11.7982	9.91178
						-26.3361	-20.5942					10.6792	10.0644
						-26.2162	-20.7932					10.9844	9.6066
						-26.0932	-21.0848					10.0689	9.37772
						-25.9646	-21.4873					9.96714	9.14884
						-25.8291	-22.0157					10.0689	9.75919
						-25.6921	-22.6656					9.45852	7.47037
						-25.5696	-23.4017					9.66197	7.54666
						-25.486	-24.1532					9.96714	7.62296
						-25.4665	-24.8236					9.66197	7.69925
						-25.5257	-25.3124					10.2723	7.62296
						-25.6588	-25.5428					10.0689	7.85184
						-25.8397	-25.4844					9.45852	7.77555
						-26.0286	-25.1629					10.1706	7.77555
						-26.1838	-24.65					10.2723	7.24149
						-26.2733	-24.0428					11.0861	7.24149
						-26.2798	-23.4371					10.7809	7.01261
						-26.1994	-22.9077					10.9844	7.0889
						-26.0365	-22.4965					11.3913	7.24149
						-25.801	-22.2128					11.5947	8.08072
						-25.5082	-22.0402					11.493	8.00443
						-25.1822	-21.9508					11.3913	8.15702
						-24.8585	-21.92					12.5103	8.15702
						-24.5829	-21.9391					13.3241	8.76737
						-24.4048	-22.0177					14.1379	8.91996
						-24.3667	-22.173					14.0362	8.91996
						-24.4924	-22.4093					13.9344	9.37772
						-24.7766	-22.699					13.5275	10.1407
						-25.1829	-22.9796					14.4431	10.1407
						-25.6503	-23.171					14.3413	10.9799
						-26.1085	-23.2087					13.9344	11.5139
						-26.4948	-23.0746					13.6293	11.2088
						-26.768	-22.8082					14.5448	11.4377
						-26.9124	-22.4916					14.5448	11.5902
						-26.9335	-22.2172					14.7482	11.7428
						-26.8509	-22.0536					14.85	11.8191
						-26.6908	-22.0254					14.9517	11.3614
						-26.4835	-22.1133					14.7482	11.5139
						-26.2617	-22.2701					14.7482	11.2088
						-26.0578	-22.4426					14.7482	11.5902
						-25.8997	-22.5905					15.3586	11.1325
						-25.8021	-22.6949					15.562	10.5221
						-25.7567	-22.7507					15.6638	11.0562
						-25.7185	-22.744					16.0707	11.2088
						-25.5891	-22.6165					17.2914	10.5984
						-25.199	-22.2269					17.3931	10.9036
						-24.2997	-21.3281					16.7827	11.1325
						-22.5897	-19.589					16.7827	11.9717
						-19.7964	-16.6829					16.2741	11.5139
						-15.8169	-12.4437					15.562	11.4377
						-10.8795	-7.04341					14.4431	10.8273
						-5.63934	-1.103					14.3413	11.7428
						-1.12019	4.35478					14.7482	11.3614
						1.53612	8.14632					14.3413	11.2088
						1.44169	9.29413					13.731	10.9799
						-1.70061	7.36783					14.0362	11.4377
						-7.4603	2.63895					13.8327	11.1325
						-14.814	-4.02333					13.4258	11.6665
						-22.4857	-11.4587					14.3413	12.5058
						-29.3309	-18.5761					17.5965	15.5575
						-34.6064	-24.6158					25.8363	23.0343
						-38.0496	-29.2385					40.8916	38.0642
						-39.7926	-32.4565					66.6281	63.0124
						-40.196	-34.4855					104.877	100.473
						-39.6867	-35.5987					153.908	149.53
						-38.6485	-36.0336					210.366	206.216
						-37.3738	-35.9604					265.501	263.284
						-36.0578	-35.4945					314.024	312.951
						-34.8145	-34.7226					345.966	347.055
						-33.6967	-33.7226					356.036	359.72
						-32.7137	-32.5704					340.778	346.902
						-31.8479	-31.3379					301.817	309.518
						-31.0703	-30.0915					243.121	252.374
						-30.3553	-28.8937					171.812	183.099
						-29.6897	-27.8032					95.2129	106.5
						-29.0746	-26.8708					21.6655	32.2659
						-28.5195	-26.1296					-44.5576	-33.7284
						-28.0355	-25.5875					-97.0478	-87.7445
						-27.6295	-25.2267					-134.686	-127.723
						-27.3031	-25.0131					-157.981	-152.594
						-27.0545	-24.9109					-167.137	-165.869
						-26.8801	-24.8922					-167.238	-167.929
						-26.7749	-24.9385					-158.49	-161.673
						-26.7328	-25.0331					-144.248	-150.229
						-26.7474	-25.1518					-127.667	-134.513
						-26.8126	-25.259					-110.272	-118.796
						-26.9233	-25.3127					-93.9961	-103.461
						-27.0728	-25.2769					-80.1614	-88.4311
						-27.25	-25.1347					-67.5475	-75.2323
						-27.4366	-24.8941					-55.3405	-63.5593
						-27.6064	-24.5841					-45.4731	-54.3277
						-27.7292	-24.2421					-37.5386	-46.0117
						-27.7782	-23.9022					-30.8247	-39.6793
						-27.7379	-23.5888					-25.535	-32.7365
						-27.6093	-23.3209					-20.4487	-28.6167
						-27.4096	-23.1198					-17.0918	-24.4205
						-27.1667	-23.0147					-13.5314	-21.2162
						-26.9119	-23.0396					-10.7848	-18.1644
						-26.6721	-23.2215					-8.24168	-16.3333
						-26.467	-23.5659					-6.10545	-14.426
						-26.3076	-24.0462					-3.66404	-13.3579
						-26.1988	-24.6047					-3.35887	-11.6794
						-26.141	-25.164					-1.93471	-10.535
						-26.1316	-25.6461					-0.408834	-8.62765
						-26.164	-25.9896					1.42222	-7.10177
						-26.2271	-26.1598					2.23602	-5.88107
						-26.3053	-26.1483					2.64292	-5.11813
						-26.3795	-25.9656					2.33775	-3.74484
						-26.431	-25.6342					3.86363	-3.36337
						-26.445	-25.1845					4.98261	-2.29525
						-26.4146	-24.655					5.38951	-2.06637
						-26.3436	-24.0922					6.20331	-1.37973
						-26.246	-23.5464					6.50848	-1.37973
						-26.1421	-23.0635					6.30503	-0.159024
						-26.0518	-22.6765					5.99986	0.222446
						-25.9865	-22.4026					5.79641	1.36686
						-25.9455	-22.247					7.01711	1.59574
						-25.9183	-22.2095					6.91539	2.43497
						-25.8917	-22.2899					7.32229	2.51126
						-25.8585	-22.4879					7.93264	2.74015
						-25.8195	-22.7992					8.54299	2.35868
						-25.7796	-23.2099					8.23781	2.58756
						-25.7395	-23.6911					7.72919	2.43497
						-25.6917	-24.1981					9.25507	3.04532
						-25.6249	-24.6715					9.66197	2.89273
						-25.5362	-25.0448					9.66197	2.66385
						-25.4406	-25.2546					9.66197	2.81644
						-25.3713	-25.2539					10.2723	3.19791
						-25.3676	-25.0222					10.6792	3.19791
						-25.456	-24.5726					10.6792	3.73197
						-25.6367	-23.9519					10.7809	3.80826
						-25.8819	-23.2358					10.8827	4.80008
						-26.148	-22.5179					11.1878	4.41861
						-26.3931	-21.8943					10.8827	4.03714
						-26.5922	-21.4463					11.3913	3.3505
						-26.7424	-21.2254					11.2896	4.26603
						-26.8573	-21.246					11.2896	3.96085
						-26.955	-21.4884					11.5947	3.80826
						-27.0442	-21.9096					11.0861	2.96903
						-27.1152	-22.4578					10.9844	2.66385
						-27.1399	-23.0836					10.7809	2.28238
						-27.0826	-23.746					10.374	2.96903
						-26.9182	-24.411					10.2723	2.96903
						-26.6496	-25.0465					10.4758	3.73197
						-26.316	-25.6159					9.96714	3.42679
						-25.9853	-26.0729					9.76369	3.73197
						-25.7334	-26.3645					10.374	4.26603
						-25.618	-26.4404					10.0689	5.10526
						-25.6601	-26.2687					10.2723	4.41861
						-25.8399	-25.8514					10.7809	4.41861
						-26.1073	-25.2319					10.5775	4.11344
						-26.3999	-24.4902					10.6792	4.11344
						-26.6612	-23.7252					9.76369	3.50309
						-26.8505	-23.0307					9.96714	4.11344
						-26.9469	-22.4737					9.86542	3.73197
						-26.9472	-22.0852					9.66197	5.02896
						-26.862	-21.8638					9.96714	4.80008
						-26.7103	-21.7905					9.45852	5.48673
						-26.5147	-21.8431					9.45852	5.33414
						-26.2967	-22.0022					9.25507	4.72379
						-26.0739	-22.2474					8.84816	4.72379
						-25.8603	-22.5476					8.23781	5.8682
						-25.6691	-22.8556					7.72919	5.63932
						-25.5157	-23.1131					7.62746	6.24967
						-25.4185	-23.2652					8.13609	6.02079
						-25.3957	-23.2759					9.05162	6.17337
						-25.4584	-23.1376					9.05162	6.24967
						-25.6037	-22.8698					9.15334	5.94449
						-25.8103	-22.5083					9.66197	5.8682
						-26.0412	-22.0937					9.45852	5.8682
						-26.2515	-21.6626					9.86542	6.47855
						-26.4007	-21.2472					9.35679	5.94449
						-26.4637	-20.8791					9.05162	5.94449
						-26.4371	-20.5934					9.86542	6.09708
						-26.3388	-20.427					9.86542	5.18155
						-26.1996	-20.4105					9.56024	4.72379
						-26.0531	-20.5568					9.35679	4.64749
						-25.9263	-20.8529					9.56024	4.34232
						-25.8354	-21.2613					9.56024	3.19791
						-25.7864	-21.7306					9.35679	4.11344
						-25.7763	-22.2103					9.86542	4.87638
						-25.7966	-22.6616					8.44126	5.63932
						-25.8351	-23.058					8.64471	5.8682
						-25.8803	-23.3787					9.76369	6.17337
						-25.9264	-23.6007					11.0861	6.24967
						-25.9765	-23.6979					10.8827	7.01261
						-26.0417	-23.6499					11.3913	6.55484
						-26.1348	-23.4538					11.7982	7.16519
						-26.2606	-23.1317					12.2051	7.16519
						-26.409	-22.7288					12.4085	7.0889
						-26.5542	-22.3025					12.3068	6.86002
						-26.6621	-21.9107					12.4085	7.92813
						-26.7015	-21.6022					13.1206	6.93631
						-26.6557	-21.4121					13.2224	7.24149
						-26.5275	-21.3599					12.8155	6.55484
						-26.3376	-21.4492					12.8155	6.32596
						-26.1178	-21.6686					13.2224	6.09708
						-25.9035	-21.9951					13.3241	6.55484
						-25.7277	-22.4009					13.2224	6.24967
						-25.6192	-22.858					12.8155	7.31778
						-25.5997	-23.3367					11.3913	7.39408
						-25.6813	-23.7997					10.5775	7.92813
						-25.862	-24.1947					10.6792	7.54666
						-26.1244	-24.4553					10.7809	7.47037
						-26.439	-24.5138					11.0861	7.54666
						-26.7712	-24.3221					10.5775	6.63114
						-27.0896	-23.8728					10.6792	6.32596
						-27.3703	-23.2083					10.7809	6.78373
						-27.5967	-22.4163					10.6792	5.71561
						-27.7557	-21.6096					10.374	5.7919
						-27.8357	-20.9005					10.2723	5.48673
						-27.8275	-20.3754					9.86542	5.48673
						-27.7277	-20.0787					10.4758	4.87638
						-27.5426	-20.0088					10.7809	5.25785
						-27.2898	-20.1288					10.374	4.11344
						-26.9948	-20.3851					9.96714	2.89273
						-26.6847	-20.7266					9.86542	2.0535
						-26.3826	-21.1172					9.45852	1.67203
						-26.1053	-21.5383					8.33954	1.97721
						-25.865	-21.9819					6.91539	1.82462
						-25.6736	-22.4389					6.91539	1.59574
						-25.5442	-22.889					5.89813	1.90091
						-25.4885	-23.2948					5.59296	0.832798
						-25.5117	-23.6056					5.38951	1.29056
						-25.609	-23.7704					5.69468	0.375034
						-25.7662	-23.7568					5.49123	0.832798
						-25.9641	-23.5673					5.08433	0.29874
						-26.1842	-23.2435					5.89813	0.603916
						-26.4113	-22.8561					4.88088	0.069858
						-26.6328	-22.4836					4.37225	-0.0064359
						-26.8362	-22.1921					4.5757	-0.693081
						-27.0083	-22.0247					4.47398	-0.693081
						-27.1344	-22.0025					4.5757	-0.616787
						-27.2004	-22.1327					3.7619	-0.769375
						-27.1948	-22.4151					3.355	-1.91378
						-27.1129	-22.8408					3.25328	-2.60043
						-26.9596	-23.3835					2.74465	-3.21078
						-26.7514	-23.9914					2.5412	-2.37155
						-26.5138	-24.5873					1.62567	-2.75302
						-26.2764	-25.0829					0.811869	-2.06637
						-26.0682	-25.4032					-0.408834	-2.37155
						-25.9161	-25.5085					0.506694	-2.67672
						-25.8454	-25.4026					-0.103658	-2.67672
						-25.8792	-25.1237					-1.01919	-2.37155
						-26.0349	-24.7222					-1.42609	-3.05819
						-26.3152	-24.2417					-0.307108	-2.9819
						-26.7	-23.711					-0.71401	-3.36337
						-27.1431	-23.1511					-1.32436	-3.21078
						-27.5785	-22.5872					-0.815735	-3.13449
						-27.9355	-22.0582					-0.815735	-2.9819
						-28.1591	-21.6142					-0.408834	-3.21078
						-28.2256	-21.3062					0.0997926	-2.90561
						-28.1492	-21.1706					0.303243	-2.82931
						-27.9747	-21.2175					-0.205383	-2.9819
						-27.7608	-21.4271					0.201518	-2.75302
						-27.5602	-21.7552					-0.205383	-3.74484
						-27.4041	-22.1451					-0.408834	-4.81295
						-27.297	-22.5411					-1.12091	-4.2026
						-27.2232	-22.8984					-1.93471	-4.05001
						-27.1602	-23.1895					-2.64679	-3.89743
						-27.0942	-23.4043					-3.66404	-4.43148
						-27.0284	-23.5483					-3.86749	-4.12631
						-26.9831	-23.6374					-4.17267	-4.2789
						-26.9853	-23.6905					-4.47784	-3.97372
						-27.0552	-23.7218					-4.57957	-4.12631
						-27.193	-23.7362					-4.37612	-4.2026
						-27.3744	-23.7293					-3.35887	-4.58407
						-27.5556	-23.6927					-3.05369	-4.43148
						-27.688	-23.6217					-3.46059	-4.88925
						-27.7357	-23.5222					-2.34161	-5.11813
						-27.689	-23.4144					-1.93471	-6.03366
						-27.5682	-23.3323					-1.93471	-5.72848
						-27.4162	-23.32					-1.52781	-6.7966
						-27.2828	-23.4223					-1.62954	-7.02548
						-27.2084	-23.6724					-1.52781	-7.86471
						-27.2123	-24.0768					-1.52781	-8.39877
						-27.2897	-24.6037					-2.34161	-7.78842
						-27.417	-25.1819					-2.64679	-7.48324
						-27.5619	-25.7133					-3.86749	-8.16989
						-27.694	-26.097					-4.07094	-7.48324
						-27.7938	-26.2559					-4.17267	-8.39877
						-27.857	-26.1565					-3.66404	-8.16989
						-27.8945	-25.8138					-4.68129	-9.08542
						-27.9274	-25.2839					-5.59682	-9.16171
						-27.9781	-24.6477					-5.59682	-10.0009
						-28.0601	-23.9934					-6.41062	-10.2298
						-28.1708	-23.3994					-6.3089	-11.2216
						-28.2908	-22.9231					-6.20717	-11.1454
						-28.391	-22.5936					-7.5296	-11.6031
						-28.4456	-22.4113					-7.73305	-12.2135
						-28.4433	-22.3549					-7.42788	-12.8238
						-28.3919	-22.3911					-7.63133	-13.6631
						-28.313	-22.4879					-7.5296	-13.7393
						-28.2313	-22.6225					-8.13995	-14.1208
						-28.1646	-22.7856					-8.13995	-15.5704
						-28.1187	-22.9782					-8.3434	-14.8838
						-28.0891	-23.2036					-8.64858	-15.6467
						-28.0668	-23.4588					-9.76756	-14.7312
						-28.0441	-23.7286					-10.5814	-15.5704
						-28.0195	-23.9861					-10.8865	-15.1889
						-27.9985	-24.1989					-11.2934	-15.3415
						-27.9931	-24.3386					-11.5986	-15.1889
						-28.0178	-24.3899					-12.6159	-15.3415
						-28.0849	-24.3559					-12.8193	-15.5704
						-28.1993	-24.258					-12.921	-15.7993
						-28.3544	-24.1303					-13.7348	-16.1045
						-28.5309	-24.0098					-14.3452	-15.9519
						-28.6991	-23.9265					-14.2435	-16.6385
						-28.825	-23.8969					-15.8711	-16.9437
						-28.8788	-23.9235					-15.2607	-17.7066
						-28.8436	-24.0008					-14.9555	-18.5459
						-28.7202	-24.1218					-14.7521	-18.6222
						-28.5273	-24.2829					-15.6676	-19.614
						-28.2963	-24.4847					-15.4642	-20.911
						-28.0632	-24.7303					-15.9728	-21.445
						-27.8604	-25.0231					-16.3797	-21.1399
						-27.7128	-25.3639					-16.1762	-21.5213
						-27.6379	-25.748					-17.2952	-21.5213
						-27.6476	-26.1619					-17.1935	-21.5213
						-27.7491	-26.5801					-17.0918	-21.9028
						-27.9428	-26.9658					-17.4987	-21.9028
						-28.2195	-27.275					-17.397	-21.7502
						-28.5586	-27.4655					-17.6004	-21.9028
						-28.93	-27.5066					-18.3125	-21.5213
						-29.2992	-27.3876					-17.9056	-21.5976
						-29.6318	-27.1205					-18.4142	-21.8265
						-29.8988	-26.739					-19.4315	-21.9791
						-30.0793	-26.2915					-19.7366	-21.445
						-30.1636	-25.8317					-19.6349	-22.1317
						-30.1554	-25.409					-20.0418	-22.4369
						-30.071	-25.0589					-19.7366	-22.5894
						-29.9355	-24.7982					-19.8384	-21.9028
						-29.7767	-24.6242					-19.7366	-22.8183
						-29.6204	-24.5196					-20.5504	-22.742
						-29.4871	-24.4599					-21.0591	-23.3524
						-29.3907	-24.4216					-21.466	-22.5894
						-29.3386	-24.3871					-22.2798	-23.2761
						-29.3306	-24.3469					-23.297	-22.8946
						-29.3598	-24.2995					-22.7884	-23.3524
						-29.4151	-24.2496					-22.5849	-23.5813
						-29.4865	-24.2064					-22.178	-23.7339
						-29.5693	-24.18					-21.8729	-23.5813
						-29.6643	-24.1782					-22.2798	-24.6494
						-29.7733	-24.2043					-22.178	-25.4123
						-29.8928	-24.2562					-22.178	-25.0308
						-30.0091	-24.3292					-22.3815	-24.9546
						-30.0993	-24.4186					-22.178	-25.8701
						-30.1373	-24.5213					-23.0936	-25.2597
						-30.1029	-24.6354					-23.0936	-26.7093
						-29.991	-24.7587					-22.9918	-25.9464
						-29.8152	-24.8874					-21.8729	-26.4041
						-29.6065	-25.0173					-22.2798	-26.3278
						-29.4043	-25.1447					-21.8729	-27.0908
						-29.245	-25.2695					-21.6694	-27.0145
						-29.1516	-25.3952					-21.7711	-27.6248
						-29.1291	-25.5277					-21.8729	-26.633
						-29.1679	-25.6705					-22.6867	-27.7011
						-29.2517	-25.8193					-22.5849	-27.4723
						-29.3658	-25.9597					-22.0763	-28.2352
						-29.5	-26.0703					-22.3815	-28.2352
						-29.6471	-26.13					-22.5849	-28.6167
						-29.7983	-26.1265					-22.8901	-28.2352
						-29.9406	-26.0616					-23.297	-29.227
						-30.0571	-25.9516					-23.7039	-29.0744
						-30.1305	-25.8228					-23.3987	-29.6848
						-30.149	-25.7038					-23.7039	-29.8374
						-30.1099	-25.6184					-24.5177	-30.2188
						-30.0212	-25.5806					-25.6367	-29.7611
						-29.8991	-25.5918					-26.5522	-30.2951
						-29.7626	-25.6433					-25.7384	-30.6003
						-29.6281	-25.7199					-26.0436	-30.9055
						-29.5063	-25.8069					-24.8229	-31.0581
						-29.4027	-25.8939					-25.8401	-31.8973
						-29.3215	-25.977					-26.0436	-31.9736
						-29.27	-26.0562					-26.654	-32.3551
						-29.2605	-26.1304					-27.0609	-31.6684
						-29.3068	-26.1932					-26.4505	-32.0499
						-29.4196	-26.2314					-27.4678	-31.8973
						-29.5992	-26.2264					-26.4505	-31.9736
						-29.8322	-26.1603					-27.366	-31.821
						-30.0931	-26.0211					-27.6712	-32.1262
						-30.3507	-25.8059					-28.0781	-31.9736
						-30.5776	-25.5206					-28.485	-31.9736
						-30.7581	-25.1776					-28.6885	-31.5921
						-30.8904	-24.7942					-28.5867	-32.584
						-30.9826	-24.3937					-28.9936	-32.584
						-31.0438	-24.0089					-28.9936	-32.9654
						-31.0778	-23.6858					-30.3161	-33.118
						-31.0819	-23.4818					-30.9264	-33.4232
						-31.0509	-23.4569					-30.8247	-33.3469
						-30.983	-23.6569					-30.2143	-33.0417
						-30.8827	-24.0955					-30.3161	-33.4995
						-30.76	-24.7423					-30.0109	-34.5676
						-30.6263	-25.5239					-30.8247	-34.6439
						-30.4906	-26.3382					-31.1299	-34.8728
						-30.358	-27.0778					-30.5195	-34.7965
						-30.2299	-27.6543					-30.723	-35.4831
						-30.1065	-28.0135					-30.4178	-35.9409
						-29.9892	-28.1393					-30.723	-36.1698
						-29.8826	-28.0467					-30.6212	-36.8564
						-29.7955	-27.769					-30.9264	-37.6194
						-29.7399	-27.347					-30.723	-37.0853
						-29.7278	-26.8221					-31.0281	-37.3142
						-29.7675	-26.2364					-31.7402	-37.3905
						-29.8592	-25.6347					-31.3333	-37.6194
						-29.9931	-25.0681					-31.435	-38.0008
						-30.1502	-24.5948					-32.2488	-38.5349
						-30.306	-24.2768					-32.7575	-38.9926
						-30.4366	-24.1714					-33.673	-38.9163
						-30.5251	-24.3179					-33.7747	-38.2297
						-30.5643	-24.724					-33.2661	-38.4586
						-30.5571	-25.3548					-33.4695	-38.7638
						-30.5129	-26.1339					-33.7747	-39.1452
						-30.4432	-26.9557					-34.0799	-38.6875
						-30.3575	-27.7085					-33.673	-38.7638
						-30.2604	-28.2996					-33.2661	-37.9245
						-30.1511	-28.672					-33.9782	-38.6112
						-30.0252	-28.8065					-34.5885	-38.1534
						-29.8784	-28.7125					-34.4868	-38.0771
						-29.7133	-28.4138					-34.792	-37.8482
						-29.5437	-27.9402					-34.9954	-38.306
						-29.396	-27.3278					-35.0971	-36.7801
						-29.3052	-26.6237					-35.4023	-37.6194
						-29.3051	-25.8879					-35.1989	-37.5431
						-29.4185	-25.1858					-35.1989	-38.4586
						-29.649	-24.5758					-34.792	-37.8482
						-29.9788	-24.101					-35.1989	-39.1452
						-30.3709	-23.788					-36.5213	-39.4504
						-30.7772	-23.6547					-37.742	-39.8319
						-31.1481	-23.7152					-37.1317	-39.1452
						-31.4441	-23.976					-36.623	-39.3741
						-31.6441	-24.425					-36.3179	-40.1371
						-31.7481	-25.0216					-36.8265	-40.4422
						-31.7727	-25.6979					-36.5213	-40.3659
						-31.7414	-26.3744					-36.0127	-40.2896
						-31.6747	-26.9811					-35.8092	-40.7474
						-31.5862	-27.473					-35.4023	-40.6711
						-31.4835	-27.831					-35.0971	-40.2896
						-31.3723	-28.0514					-35.504	-40.5948
						-31.2593	-28.1333					-35.7075	-40.5185
						-31.1498	-28.0749					-35.3006	-41.0526
						-31.044	-27.8785					-35.0972	-41.1289
						-30.9352	-27.5603					-35.7075	-42.5785
						-30.8136	-27.1556					-36.4196	-42.5785
						-30.6741	-26.7158					-36.9282	-43.5703
						-30.5223	-26.3006					-37.6403	-43.5703
						-30.3748	-25.9699					-37.742	-44.9436
						-30.2519	-25.7793					-39.4713	-44.6384
						-30.1671	-25.775					-40.2851	-45.4013
						-30.1193	-25.9878					-41.3024	-45.6302
						-30.0924	-26.4245					-41.9127	-46.4694
						-30.062	-27.0598					-42.0145	-46.088
						-30.0053	-27.8348					-42.4214	-45.7828
						-29.91	-28.6632					-41.5058	-45.8591
						-29.778	-29.4439					-41.5058	-45.6302
						-29.6245	-30.0772					-41.6076	-45.1725
						-29.4751	-30.4785					-41.5058	-45.2487
						-29.3613	-30.5904					-41.9127	-45.2487
						-29.316	-30.3908					-42.2179	-45.5539
						-29.3664	-29.896					-42.2179	-45.2487
						-29.5268	-29.1604					-42.5231	-46.1643
						-29.792	-28.2676					-42.6248	-45.9354
						-30.1363	-27.3174					-42.7265	-46.3932
						-30.519	-26.4075					-42.1162	-45.7065
						-30.8939	-25.6182					-42.1162	-46.7746
						-31.2185	-25.0035					-42.4214	-46.3932
						-31.4601	-24.5909					-42.7265	-46.5457
						-31.5989	-24.3872					-43.6421	-45.7065
						-31.6295	-24.3855					-44.5576	-45.7828
						-31.563	-24.5686					-45.168	-45.8591
						-31.426	-24.909					-45.88	-47.0035
						-31.2558	-25.3682					-45.4731	-45.7828
						-31.092	-25.8971					-45.168	-45.6302
						-30.9666	-26.4408					-44.5576	-45.8591
						-30.898	-26.9442					-44.1507	-45.7828
						-30.8906	-27.3578					-44.049	-46.3169
						-30.9387	-27.6404					-43.2352	-46.6983
						-31.0333	-27.7635					-43.3369	-46.9272
						-31.1665	-27.7151					-43.3369	-47.385
						-31.3348	-27.5064					-43.3369	-47.1561
						-31.5374	-27.1753					-43.3369	-47.4613
						-31.7722	-26.783					-43.4386	-47.7664
						-32.0307	-26.4033					-43.5403	-47.385
						-32.2937	-26.1051					-43.9472	-47.6902
						-32.534	-25.9378					-43.7438	-47.9953
						-32.7231	-25.9233					-43.9472	-47.9953
						-32.8412	-26.058					-44.4559	-47.7664
						-32.8822	-26.3201					-44.8628	-46.6983
						-32.8518	-26.677					-43.9472	-47.2324
						-32.7599	-27.0903					-44.3541	-47.0798
						-32.6127	-27.5166					-44.761	-46.8509
						-32.4104	-27.9097					-44.4559	-46.0117
						-32.151	-28.2258					-43.0317	-45.4776
						-31.8384	-28.4329					-43.3369	-45.4013
						-31.4873	-28.5196					-42.1162	-45.5539
						-31.1252	-28.4983					-41.811	-45.325
						-30.7882	-28.3996					-41.6076	-46.622
						-30.5154	-28.2598					-42.1162	-46.7746
						-30.3416	-28.1091					-42.6248	-47.7664
						-30.2894	-27.967					-43.1334	-48.3768
						-30.3641	-27.8445					-43.6421	-48.9871
						-30.5515	-27.7499					-44.049	-49.1397
						-30.8219	-27.6897					-43.5403	-49.5212
						-31.1391	-27.6652					-43.8455	-49.6738
						-31.4704	-27.6695					-44.8628	-50.1316
						-31.7929	-27.6913					-46.2869	-49.216
						-32.0939	-27.7251					-46.7956	-49.3686
						-32.3652	-27.7828					-46.8973	-48.9871
						-32.5957	-27.8951					-46.7956	-49.1397
						-32.7669	-28.0993					-47.9145	-49.8264
						-32.855	-28.4165					-47.4059	-50.2079
						-32.8386	-28.8309					-48.4232	-50.8182
						-32.7097	-29.2839					-47.5076	-51.0471
						-32.4821	-29.6875					-46.8973	-51.3523
						-32.1926	-29.9526					-47.3042	-51.1997
						-31.8945	-30.0171					-47.3042	-50.8182
						-31.645	-29.8609					-47.9145	-51.3523
						-31.4907	-29.504					-48.3214	-51.1997
						-31.4572	-28.9923					-48.0163	-51.4286
						-31.5446	-28.3819					-48.0163	-50.8182
						-31.731	-27.7312					-48.8301	-50.513
						-31.9813	-27.0998					-48.8301	-50.1316
						-32.2587	-26.5492					-49.237	-51.1234
						-32.5349	-26.1386					-49.6439	-51.8863
						-32.7951	-25.9132					-49.6439	-52.1915
						-33.0357	-25.8916					-50.3559	-52.1152
						-33.2562	-26.0578					-50.6611	-53.107
						-33.4503	-26.3645					-50.9663	-54.2514
						-33.6	-26.7464					-50.8646	-54.7092
						-33.6786	-27.1368					-51.6784	-54.2514
						-33.6607	-27.4807					-51.6784	-55.0907
						-33.5343	-27.741					-51.9835	-54.4803
						-33.3087	-27.8982					-51.1697	-55.167
						-33.0138	-27.9487					-51.4749	-54.2514
						-32.6902	-27.9032					-51.5766	-54.3277
						-32.3761	-27.7846					-51.6784	-53.7174
						-32.0963	-27.6246					-51.7801	-53.7937
						-31.8592	-27.4571					-51.9835	-54.404
						-31.6612	-27.3098					-52.187	-54.8618
						-31.4944	-27.1983					-52.3904	-54.3277
						-31.3533	-27.1237					-51.7801	-54.7092
						-31.2359	-27.0751					-52.6956	-54.6329
						-31.1346	-27.0311					-52.8991	-55.167
						-31.0175	-26.9529					-52.6956	-54.1751
						-30.801	-26.7649					-53.306	-53.6411
						-30.3199	-26.3223					-52.7973	-53.3359
						-29.3135	-25.385					-52.6956	-53.6411
						-27.4536	-23.627					-52.4922	-53.4885
						-24.4396	-20.7145					-52.8991	-53.3359
						-20.16	-16.4619					-53.4077	-52.7256
[truncated: 15,753 more rows]
