# Supplementary material for: Dendritic sodium spikes are required for long-term potentiation at distal synapses on hippocampal pyramidal neurons
Source: eLife. 2015 Aug 6;4:e06414. doi: 10.7554/eLife.06414 (PMC4576155; doi:10.7554/eLife.06414)
Supplement: Figure 7—source data 2. — DOI: http://dx.doi.org/10.7554/eLife.06414.026 [file elife06414s011.xlsx]

## Sheet: Figure 7S1
Panel B	Time	R	G0/R	Peak ∆G/R	Integral ∆G/R		Panel C	R		0.4-1.4	1.4-2.4	G0/R		0.4-1.4	1.4-2.4	Peak ∆G/R		0.4-1.4	1.4-2.4	Integral ∆G/R		0.4-1.4	1.4-2.4
	1.03333	0.85185	0.890492	1.12453	1.49562				Mean	0.901476	1.18306		Mean	1.04103	1.00301		Mean	1.05308	0.922237		Mean	1.05474	1.17103
	1.31667	1	1	1	1				SEM	0.0650992	0.106431		SEM	0.0702135	0.0236043		SEM	0.0283662	0.0717805		SEM	0.0995078	0.09065
	1.56667	1.22428	0.972334	0.812134	1.24077
	1.93333	1.37643	0.968306	0.76511	0.889524
	2.25	1.50527	0.950521	0.759295	1.79563
	2.56667	1.59559	0.977654	0.66816	1.38378
	1.41667	1	1	1	1
	1.775	1.05394	1.02689	0.931989	1.10368
	2.11667	1.30711	1.06375	1.04374	1.30518
	0.933333	0.778502	1.17786	1.09697	0.916399
	1.40833	1	1	1	1
