# Supplementary material for: Dendritic sodium spikes are required for long-term potentiation at distal synapses on hippocampal pyramidal neurons
Source: eLife. 2015 Aug 6;4:e06414. doi: 10.7554/eLife.06414 (PMC4576155; doi:10.7554/eLife.06414)
Supplement: Figure 8—source data 1. — DOI: http://dx.doi.org/10.7554/eLife.06414.029 [file elife06414s012.xlsx]

## Sheet: Figure 8
For simulation, time step = 0.025 ms	Panel B	V	Control	TTX	Control	AP5	[Ca2+]OGB	Control	TTX	Control	AP5		Panel C	Top	Peak amplitude	TTX	AP5	Burst integral		TTX	AP5	Peak ∆G/R		TTX	AP5	Integral ∆G/R		TTX	AP5	Bottom	Peak amplitude	TTX	AP5	Burst integral	TTX	AP5	Peak ∆[Ca2+]OGB		TTX	AP5	Integral ∆[Ca2+]OGB		TTX	AP5		Panel D	V	Control	TTX
			-71.5368	-71.5461	-71.5368	-71.4794		0.006656	0.006656	0.006656	0.006656					0.36	0.89		Mean	0.86838	0.545336		Mean	0.59215	0.22604		Mean	0.70163	0.25052			0.25	1.01		0.84	0.69		Mean	0.8	0.37		Mean	0.75	0.28				-71.8322	-71.84
			-71.5367	-71.546	-71.5367	-71.4794		0.006656	0.006656	0.006656	0.006656								SD	0.115303	0.167453		SD	0.320109	0.160952		SD	0.32974	0.202006									SD	0.209762	0.419524		SD	0.209762	0.209762				-71.8321	-71.8399
			-71.5367	-71.5459	-71.5367	-71.4794		0.006656	0.006656	0.006656	0.006656																																					-71.832	-71.8398
			-71.5366	-71.5459	-71.5366	-71.4794		0.006656	0.006656	0.006656	0.006656																																					-71.8319	-71.8397
			-71.5365	-71.5458	-71.5365	-71.4794		0.006656	0.006656	0.006656	0.006656																																					-71.8318	-71.8396
			-71.5365	-71.5457	-71.5365	-71.4794		0.006656	0.006656	0.006656	0.006656																																					-71.8317	-71.8395
			-71.5364	-71.5457	-71.5364	-71.4794		0.006656	0.006656	0.006656	0.006656																																					-71.8316	-71.8394
			-71.5363	-71.5456	-71.5363	-71.4794		0.006656	0.006656	0.006656	0.006656																																					-71.8315	-71.8393
			-71.5362	-71.5455	-71.5362	-71.4794		0.006656	0.006656	0.006656	0.006656																																					-71.8314	-71.8392
			-71.5362	-71.5455	-71.5362	-71.4794		0.006656	0.006656	0.006656	0.006656																																					-71.8313	-71.8391
			-71.5361	-71.5454	-71.5361	-71.4794		0.006656	0.006656	0.006656	0.006656																																					-71.8312	-71.839
			-71.536	-71.5453	-71.536	-71.4794		0.006656	0.006656	0.006656	0.006656																																					-71.8311	-71.8389
			-71.536	-71.5453	-71.536	-71.4794		0.006656	0.006656	0.006656	0.006656																																					-71.831	-71.8388
			-71.5359	-71.5452	-71.5359	-71.4794		0.006656	0.006656	0.006656	0.006656																																					-71.8309	-71.8387
			-71.5358	-71.5451	-71.5358	-71.4794		0.006656	0.006656	0.006656	0.006656																																					-71.8308	-71.8386
			-71.5358	-71.5451	-71.5358	-71.4794		0.006656	0.006656	0.006656	0.006656																																					-71.8307	-71.8385
			-71.5357	-71.545	-71.5357	-71.4794		0.006656	0.006656	0.006656	0.006656																																					-71.8306	-71.8384
			-71.5356	-71.5449	-71.5356	-71.4794		0.006656	0.006656	0.006656	0.006656																																					-71.8305	-71.8384
			-71.5355	-71.5449	-71.5355	-71.4794		0.006656	0.006656	0.006656	0.006656																																					-71.8304	-71.8383
			-71.5355	-71.5448	-71.5355	-71.4794		0.006656	0.006656	0.006656	0.006656																																					-71.8303	-71.8382
			-71.5354	-71.5447	-71.5354	-71.4794		0.006656	0.006656	0.006656	0.006656																																					-71.8302	-71.8381
			-71.5353	-71.5447	-71.5353	-71.4794		0.006656	0.006656	0.006656	0.006656																																					-71.8301	-71.838
			-71.5353	-71.5446	-71.5353	-71.4794		0.006656	0.006656	0.006656	0.006656																																					-71.83	-71.8379
			-71.5352	-71.5445	-71.5352	-71.4794		0.006656	0.006656	0.006656	0.006656																																					-71.8299	-71.8378
			-71.5351	-71.5445	-71.5351	-71.4794		0.006656	0.006656	0.006656	0.006656																																					-71.8298	-71.8377
			-71.5351	-71.5444	-71.5351	-71.4794		0.006656	0.006656	0.006656	0.006656																																					-71.8297	-71.8376
			-71.535	-71.5443	-71.535	-71.4794		0.006656	0.006656	0.006656	0.006656																																					-71.8296	-71.8375
			-71.5349	-71.5443	-71.5349	-71.4794		0.006656	0.006656	0.006656	0.006656																																					-71.8295	-71.8374
			-71.5349	-71.5442	-71.5349	-71.4794		0.006656	0.006656	0.006656	0.006656																																					-71.8294	-71.8373
			-71.5348	-71.5442	-71.5348	-71.4794		0.006656	0.006656	0.006656	0.006656																																					-71.8293	-71.8372
			-71.5347	-71.5441	-71.5347	-71.4794		0.006656	0.006656	0.006656	0.006656																																					-71.8292	-71.8371
			-71.5347	-71.544	-71.5347	-71.4794		0.006656	0.006656	0.006656	0.006656																																					-71.8291	-71.837
			-71.5346	-71.544	-71.5346	-71.4794		0.006656	0.006656	0.006656	0.006656																																					-71.829	-71.8369
			-71.5345	-71.5439	-71.5345	-71.4794		0.006656	0.006656	0.006656	0.006656																																					-71.8289	-71.8369
			-71.5345	-71.5438	-71.5345	-71.4794		0.006656	0.006656	0.006656	0.006656																																					-71.8288	-71.8368
			-71.5344	-71.5438	-71.5344	-71.4794		0.006656	0.006656	0.006656	0.006656																																					-71.8287	-71.8367
			-71.5343	-71.5437	-71.5343	-71.4794		0.006656	0.006656	0.006656	0.006656																																					-71.8286	-71.8366
			-71.5343	-71.5436	-71.5343	-71.4794		0.006656	0.006656	0.006656	0.006656																																					-71.8285	-71.8365
			-71.5342	-71.5436	-71.5342	-71.4794		0.006656	0.006656	0.006656	0.006656																																					-71.8284	-71.8364
			-71.5341	-71.5435	-71.5341	-71.4794		0.006656	0.006656	0.006656	0.006656																																					-71.8284	-71.8363
			-71.5341	-71.5434	-71.5341	-71.4794		0.006656	0.006656	0.006656	0.006656																																					-71.8283	-71.8362
			-71.534	-71.5434	-71.534	-71.4794		0.006656	0.006656	0.006656	0.006656																																					-71.8282	-71.8361
			-71.5339	-71.5433	-71.5339	-71.4794		0.006656	0.006656	0.006656	0.006656																																					-71.8281	-71.836
			-71.5339	-71.5433	-71.5339	-71.4794		0.006656	0.006656	0.006656	0.006656																																					-71.828	-71.8359
			-71.5338	-71.5432	-71.5338	-71.4794		0.006656	0.006656	0.006656	0.006656																																					-71.8279	-71.8358
			-71.5337	-71.5431	-71.5337	-71.4794		0.006656	0.006656	0.006656	0.006656																																					-71.8278	-71.8358
			-71.5337	-71.5431	-71.5337	-71.4794		0.006656	0.006656	0.006656	0.006656																																					-71.8277	-71.8357
			-71.5336	-71.543	-71.5336	-71.4794		0.006656	0.006656	0.006656	0.006656																																					-71.8276	-71.8356
			-71.5335	-71.5429	-71.5335	-71.4794		0.006656	0.006656	0.006656	0.006656																																					-71.8275	-71.8355
			-71.5335	-71.5429	-71.5335	-71.4794		0.006656	0.006656	0.006656	0.006656																																					-71.8274	-71.8354
			-71.5334	-71.5428	-71.5334	-71.4794		0.006656	0.006656	0.006656	0.006656																																					-71.8273	-71.8353
			-71.5333	-71.5428	-71.5333	-71.4794		0.006656	0.006656	0.006656	0.006656																																					-71.8272	-71.8352
			-71.5333	-71.5427	-71.5333	-71.4794		0.006656	0.006656	0.006656	0.006656																																					-71.8271	-71.8351
			-71.5332	-71.5426	-71.5332	-71.4794		0.006656	0.006656	0.006656	0.006656																																					-71.827	-71.835
			-71.5331	-71.5426	-71.5331	-71.4794		0.006656	0.006656	0.006656	0.006656																																					-71.8269	-71.835
			-71.5331	-71.5425	-71.5331	-71.4794		0.006656	0.006656	0.006656	0.006656																																					-71.8268	-71.8349
			-71.533	-71.5424	-71.533	-71.4794		0.006656	0.006656	0.006656	0.006656																																					-71.8267	-71.8348
			-71.5329	-71.5424	-71.5329	-71.4794		0.006656	0.006656	0.006656	0.006656																																					-71.8267	-71.8347
			-71.5329	-71.5423	-71.5329	-71.4794		0.006656	0.006656	0.006656	0.006656																																					-71.8266	-71.8346
			-71.5328	-71.5423	-71.5328	-71.4794		0.006656	0.006656	0.006656	0.006656																																					-71.8265	-71.8345
			-71.5327	-71.5422	-71.5327	-71.4794		0.006656	0.006656	0.006656	0.006656																																					-71.8264	-71.8344
			-71.5327	-71.5421	-71.5327	-71.4794		0.006656	0.006656	0.006656	0.006656																																					-71.8263	-71.8343
			-71.5326	-71.5421	-71.5326	-71.4794		0.006656	0.006656	0.006656	0.006656																																					-71.8262	-71.8342
			-71.5325	-71.542	-71.5325	-71.4794		0.006656	0.006656	0.006656	0.006656																																					-71.8261	-71.8342
			-71.5325	-71.5419	-71.5325	-71.4794		0.006656	0.006656	0.006656	0.006656																																					-71.826	-71.8341
			-71.5324	-71.5419	-71.5324	-71.4794		0.006656	0.006656	0.006656	0.006656																																					-71.8259	-71.834
			-71.5323	-71.5418	-71.5323	-71.4794		0.006656	0.006656	0.006656	0.006656																																					-71.8258	-71.8339
			-71.5323	-71.5418	-71.5323	-71.4794		0.006656	0.006656	0.006656	0.006656																																					-71.8257	-71.8338
			-71.5322	-71.5417	-71.5322	-71.4794		0.006656	0.006656	0.006656	0.006656																																					-71.8256	-71.8337
			-71.5322	-71.5416	-71.5322	-71.4794		0.006656	0.006656	0.006656	0.006656																																					-71.8255	-71.8336
			-71.5321	-71.5416	-71.5321	-71.4794		0.006656	0.006656	0.006656	0.006656																																					-71.8255	-71.8336
			-71.532	-71.5415	-71.532	-71.4794		0.006656	0.006656	0.006656	0.006656																																					-71.8254	-71.8335
			-71.532	-71.5415	-71.532	-71.4794		0.006656	0.006656	0.006656	0.006656																																					-71.8253	-71.8334
			-71.5319	-71.5414	-71.5319	-71.4794		0.006656	0.006656	0.006656	0.006656																																					-71.8252	-71.8333
			-71.5318	-71.5413	-71.5318	-71.4794		0.006656	0.006656	0.006656	0.006656																																					-71.8251	-71.8332
			-71.5318	-71.5413	-71.5318	-71.4794		0.006656	0.006656	0.006656	0.006656																																					-71.825	-71.8331
			-71.5317	-71.5412	-71.5317	-71.4794		0.006656	0.006656	0.006656	0.006656																																					-71.8249	-71.833
			-71.5316	-71.5412	-71.5316	-71.4794		0.006656	0.006656	0.006656	0.006656																																					-71.8248	-71.8329
			-71.5316	-71.5411	-71.5316	-71.4794		0.006656	0.006656	0.006656	0.006656																																					-71.8247	-71.8329
			-71.5315	-71.541	-71.5315	-71.4794		0.006656	0.006656	0.006656	0.006656																																					-71.8246	-71.8328
			-71.5314	-71.541	-71.5314	-71.4794		0.006656	0.006656	0.006656	0.006656																																					-71.8246	-71.8327
			-71.5314	-71.5409	-71.5314	-71.4794		0.006656	0.006656	0.006656	0.006656																																					-71.8245	-71.8326
			-71.5313	-71.5408	-71.5313	-71.4794		0.006656	0.006656	0.006656	0.006656																																					-71.8244	-71.8325
			-71.5313	-71.5408	-71.5313	-71.4794		0.006656	0.006656	0.006656	0.006656																																					-71.8243	-71.8324
			-71.5312	-71.5407	-71.5312	-71.4794		0.006656	0.006656	0.006656	0.006656																																					-71.8242	-71.8324
			-71.5311	-71.5407	-71.5311	-71.4794		0.006656	0.006656	0.006656	0.006656																																					-71.8241	-71.8323
			-71.5311	-71.5406	-71.5311	-71.4794		0.006656	0.006656	0.006656	0.006656																																					-71.824	-71.8322
			-71.531	-71.5405	-71.531	-71.4794		0.006656	0.006656	0.006656	0.006656																																					-71.8239	-71.8321
			-71.5309	-71.5405	-71.5309	-71.4794		0.006656	0.006656	0.006656	0.006656																																					-71.8238	-71.832
			-71.5309	-71.5404	-71.5309	-71.4794		0.006656	0.006656	0.006656	0.006656																																					-71.8238	-71.8319
			-71.5308	-71.5404	-71.5308	-71.4794		0.006656	0.006656	0.006656	0.006656																																					-71.8237	-71.8319
			-71.5308	-71.5403	-71.5308	-71.4794		0.006656	0.006656	0.006656	0.006656																																					-71.8236	-71.8318
			-71.5307	-71.5403	-71.5307	-71.4794		0.006656	0.006656	0.006656	0.006656																																					-71.8235	-71.8317
			-71.5306	-71.5402	-71.5306	-71.4794		0.006656	0.006656	0.006656	0.006656																																					-71.8234	-71.8316
			-71.5306	-71.5401	-71.5306	-71.4794		0.006656	0.006656	0.006656	0.006656																																					-71.8233	-71.8315
			-71.5305	-71.5401	-71.5305	-71.4794		0.006656	0.006656	0.006656	0.006656																																					-71.8232	-71.8314
			-71.5304	-71.54	-71.5304	-71.4794		0.006656	0.006656	0.006656	0.006656																																					-71.8231	-71.8314
			-71.5304	-71.54	-71.5304	-71.4794		0.006656	0.006656	0.006656	0.006656																																					-71.8231	-71.8313
			-71.5303	-71.5399	-71.5303	-71.4794		0.006656	0.006656	0.006656	0.006656																																					-71.823	-71.8312
			-71.5303	-71.5398	-71.5303	-71.4794		0.006656	0.006656	0.006656	0.006656																																					-71.8229	-71.8311
			-71.5302	-71.5398	-71.5302	-71.4794		0.006656	0.006656	0.006656	0.006656																																					-71.8228	-71.831
			-71.5301	-71.5397	-71.5301	-71.4794		0.006656	0.006656	0.006656	0.006656																																					-71.8227	-71.8309
			-71.5301	-71.5397	-71.5301	-71.4794		0.006656	0.006656	0.006656	0.006656																																					-71.8226	-71.8309
			-71.53	-71.5396	-71.53	-71.4794		0.006656	0.006656	0.006656	0.006656																																					-71.8225	-71.8308
			-71.5299	-71.5395	-71.5299	-71.4794		0.006656	0.006656	0.006656	0.006656																																					-71.8225	-71.8307
			-71.5299	-71.5395	-71.5299	-71.4794		0.006656	0.006656	0.006656	0.006656																																					-71.8224	-71.8306
			-71.5298	-71.5394	-71.5298	-71.4794		0.006656	0.006656	0.006656	0.006656																																					-71.8223	-71.8305
			-71.5298	-71.5394	-71.5298	-71.4794		0.006656	0.006656	0.006656	0.006656																																					-71.8222	-71.8305
			-71.5297	-71.5393	-71.5297	-71.4794		0.006656	0.006656	0.006656	0.006656																																					-71.8221	-71.8304
			-71.5296	-71.5393	-71.5296	-71.4794		0.006656	0.006656	0.006656	0.006656																																					-71.822	-71.8303
			-71.5296	-71.5392	-71.5296	-71.4794		0.006656	0.006656	0.006656	0.006656																																					-71.8219	-71.8302
			-71.5295	-71.5391	-71.5295	-71.4794		0.006656	0.006656	0.006656	0.006656																																					-71.8219	-71.8301
			-71.5295	-71.5391	-71.5295	-71.4794		0.006656	0.006656	0.006656	0.006656																																					-71.8218	-71.8301
			-71.5294	-71.539	-71.5294	-71.4794		0.006656	0.006656	0.006656	0.006656																																					-71.8217	-71.83
			-71.5293	-71.539	-71.5293	-71.4794		0.006656	0.006656	0.006656	0.006656																																					-71.8216	-71.8299
			-71.5293	-71.5389	-71.5293	-71.4794		0.006656	0.006656	0.006656	0.006656																																					-71.8215	-71.8298
			-71.5292	-71.5388	-71.5292	-71.4794		0.006656	0.006656	0.006656	0.006656																																					-71.8214	-71.8297
			-71.5292	-71.5388	-71.5292	-71.4794		0.006656	0.006656	0.006656	0.006656																																					-71.8214	-71.8297
			-71.5291	-71.5387	-71.5291	-71.4794		0.006656	0.006656	0.006656	0.006656																																					-71.8213	-71.8296
			-71.529	-71.5387	-71.529	-71.4794		0.006656	0.006656	0.006656	0.006656																																					-71.8212	-71.8295
			-71.529	-71.5386	-71.529	-71.4794		0.006656	0.006656	0.006656	0.006656																																					-71.8211	-71.8294
			-71.5289	-71.5386	-71.5289	-71.4794		0.006656	0.006656	0.006656	0.006656																																					-71.821	-71.8293
			-71.5288	-71.5385	-71.5288	-71.4794		0.006656	0.006656	0.006656	0.006656																																					-71.8209	-71.8293
			-71.5288	-71.5384	-71.5288	-71.4794		0.006656	0.006656	0.006656	0.006656																																					-71.8209	-71.8292
			-71.5287	-71.5384	-71.5287	-71.4794		0.006656	0.006656	0.006656	0.006656																																					-71.8208	-71.8291
			-71.5287	-71.5383	-71.5287	-71.4794		0.006656	0.006656	0.006656	0.006656																																					-71.8207	-71.829
			-71.5286	-71.5383	-71.5286	-71.4794		0.006656	0.006656	0.006656	0.006656																																					-71.8206	-71.8289
			-71.5285	-71.5382	-71.5285	-71.4794		0.006656	0.006656	0.006656	0.006656																																					-71.8205	-71.8289
			-71.5285	-71.5382	-71.5285	-71.4794		0.006656	0.006656	0.006656	0.006656																																					-71.8204	-71.8288
			-71.5284	-71.5381	-71.5284	-71.4794		0.006656	0.006656	0.006656	0.006656																																					-71.8204	-71.8287
			-71.5284	-71.538	-71.5284	-71.4794		0.006656	0.006656	0.006656	0.006656																																					-71.8203	-71.8286
			-71.5283	-71.538	-71.5283	-71.4794		0.006656	0.006656	0.006656	0.006656																																					-71.8202	-71.8286
			-71.5282	-71.5379	-71.5282	-71.4794		0.006656	0.006656	0.006656	0.006656																																					-71.8201	-71.8285
			-71.5282	-71.5379	-71.5282	-71.4794		0.006656	0.006656	0.006656	0.006656																																					-71.82	-71.8284
			-71.5281	-71.5378	-71.5281	-71.4794		0.006656	0.006656	0.006656	0.006656																																					-71.82	-71.8283
			-71.5281	-71.5378	-71.5281	-71.4794		0.006656	0.006656	0.006656	0.006656																																					-71.8199	-71.8282
			-71.528	-71.5377	-71.528	-71.4794		0.006656	0.006656	0.006656	0.006656																																					-71.8198	-71.8282
			-71.528	-71.5377	-71.528	-71.4794		0.006656	0.006656	0.006656	0.006656																																					-71.8197	-71.8281
			-71.5279	-71.5376	-71.5279	-71.4794		0.006656	0.006656	0.006656	0.006656																																					-71.8196	-71.828
			-71.5278	-71.5375	-71.5278	-71.4794		0.006656	0.006656	0.006656	0.006656																																					-71.8196	-71.8279
			-71.5278	-71.5375	-71.5278	-71.4793		0.006656	0.006656	0.006656	0.006656																																					-71.8195	-71.8279
			-71.5277	-71.5374	-71.5277	-71.4793		0.006656	0.006656	0.006656	0.006656																																					-71.8194	-71.8278
			-71.5277	-71.5374	-71.5277	-71.4793		0.006656	0.006656	0.006656	0.006656																																					-71.8193	-71.8277
			-71.5276	-71.5373	-71.5276	-71.4793		0.006656	0.006656	0.006656	0.006656																																					-71.8192	-71.8276
			-71.5275	-71.5373	-71.5275	-71.4793		0.006656	0.006656	0.006656	0.006656																																					-71.8192	-71.8276
			-71.5275	-71.5372	-71.5275	-71.4793		0.006656	0.006656	0.006656	0.006656																																					-71.8191	-71.8275
			-71.5274	-71.5371	-71.5274	-71.4793		0.006656	0.006656	0.006656	0.006656																																					-71.819	-71.8274
			-71.5274	-71.5371	-71.5274	-71.4793		0.006656	0.006656	0.006656	0.006656																																					-71.8189	-71.8273
			-71.5273	-71.537	-71.5273	-71.4793		0.006656	0.006656	0.006656	0.006656																																					-71.8188	-71.8273
			-71.5272	-71.537	-71.5272	-71.4793		0.006656	0.006656	0.006656	0.006656																																					-71.8188	-71.8272
			-71.5272	-71.5369	-71.5272	-71.4793		0.006656	0.006656	0.006656	0.006656																																					-71.8187	-71.8271
			-71.5271	-71.5369	-71.5271	-71.4793		0.006656	0.006656	0.006656	0.006656																																					-71.8186	-71.827
			-71.5271	-71.5368	-71.5271	-71.4793		0.006656	0.006656	0.006656	0.006656																																					-71.8185	-71.827
			-71.527	-71.5368	-71.527	-71.4793		0.006656	0.006656	0.006656	0.006656																																					-71.8184	-71.8269
			-71.527	-71.5367	-71.527	-71.4793		0.006656	0.006656	0.006656	0.006656																																					-71.8184	-71.8268
			-71.5269	-71.5367	-71.5269	-71.4793		0.006656	0.006656	0.006656	0.006656																																					-71.8183	-71.8267
			-71.5268	-71.5366	-71.5268	-71.4793		0.006656	0.006656	0.006656	0.006656																																					-71.8182	-71.8267
			-71.5268	-71.5365	-71.5268	-71.4793		0.006656	0.006656	0.006656	0.006656																																					-71.8181	-71.8266
			-71.5267	-71.5365	-71.5267	-71.4793		0.006656	0.006656	0.006656	0.006656																																					-71.8181	-71.8265
			-71.5267	-71.5364	-71.5267	-71.4793		0.006656	0.006656	0.006656	0.006656																																					-71.818	-71.8264
			-71.5266	-71.5364	-71.5266	-71.4793		0.006656	0.006656	0.006656	0.006656																																					-71.8179	-71.8264
			-71.5266	-71.5363	-71.5266	-71.4793		0.006656	0.006656	0.006656	0.006656																																					-71.8178	-71.8263
			-71.5265	-71.5363	-71.5265	-71.4793		0.006656	0.006656	0.006656	0.006656																																					-71.8177	-71.8262
			-71.5264	-71.5362	-71.5264	-71.4793		0.006656	0.006656	0.006656	0.006656																																					-71.8177	-71.8261
			-71.5264	-71.5362	-71.5264	-71.4793		0.006656	0.006656	0.006656	0.006656																																					-71.8176	-71.8261
			-71.5263	-71.5361	-71.5263	-71.4793		0.006656	0.006656	0.006656	0.006656																																					-71.8175	-71.826
			-71.5263	-71.5361	-71.5263	-71.4793		0.006656	0.006656	0.006656	0.006656																																					-71.8174	-71.8259
			-71.5262	-71.536	-71.5262	-71.4793		0.006656	0.006656	0.006656	0.006656																																					-71.8174	-71.8259
			-71.5262	-71.5359	-71.5262	-71.4793		0.006656	0.006656	0.006656	0.006656																																					-71.8173	-71.8258
			-71.5261	-71.5359	-71.5261	-71.4793		0.006656	0.006656	0.006656	0.006656																																					-71.8172	-71.8257
			-71.526	-71.5358	-71.526	-71.4793		0.006656	0.006656	0.006656	0.006656																																					-71.8171	-71.8256
			-71.526	-71.5358	-71.526	-71.4793		0.006656	0.006656	0.006656	0.006656																																					-71.817	-71.8256
			-71.5259	-71.5357	-71.5259	-71.4793		0.006656	0.006656	0.006656	0.006656																																					-71.817	-71.8255
			-71.5259	-71.5357	-71.5259	-71.4793		0.006656	0.006656	0.006656	0.006656																																					-71.8169	-71.8254
			-71.5258	-71.5356	-71.5258	-71.4793		0.006656	0.006656	0.006656	0.006656																																					-71.8168	-71.8253
			-71.5258	-71.5356	-71.5258	-71.4793		0.006656	0.006656	0.006656	0.006656																																					-71.8167	-71.8253
			-71.5257	-71.5355	-71.5257	-71.4793		0.006656	0.006656	0.006656	0.006656																																					-71.8167	-71.8252
			-71.5256	-71.5355	-71.5256	-71.4793		0.006656	0.006656	0.006656	0.006656																																					-71.8166	-71.8251
			-71.5256	-71.5354	-71.5256	-71.4793		0.006656	0.006656	0.006656	0.006656																																					-71.8165	-71.8251
			-71.5255	-71.5354	-71.5255	-71.4793		0.006656	0.006656	0.006656	0.006656																																					-71.8164	-71.825
			-71.5255	-71.5353	-71.5255	-71.4793		0.006656	0.006656	0.006656	0.006656																																					-71.8164	-71.8249
			-71.5254	-71.5353	-71.5254	-71.4793		0.006656	0.006656	0.006656	0.006656																																					-71.8163	-71.8248
			-71.5254	-71.5352	-71.5254	-71.4793		0.006656	0.006656	0.006656	0.006656																																					-71.8162	-71.8248
			-71.5253	-71.5351	-71.5253	-71.4793		0.006656	0.006656	0.006656	0.006656																																					-71.8161	-71.8247
			-71.5253	-71.5351	-71.5253	-71.4793		0.006656	0.006656	0.006656	0.006656																																					-71.8161	-71.8246
			-71.5252	-71.535	-71.5252	-71.4793		0.006656	0.006656	0.006656	0.006656																																					-71.816	-71.8246
			-71.5251	-71.535	-71.5251	-71.4793		0.006656	0.006656	0.006656	0.006656																																					-71.8159	-71.8245
			-71.5251	-71.5349	-71.5251	-71.4793		0.006656	0.006656	0.006656	0.006656																																					-71.8158	-71.8244
			-71.525	-71.5349	-71.525	-71.4793		0.006656	0.006656	0.006656	0.006656																																					-71.8158	-71.8244
			-71.525	-71.5348	-71.525	-71.4793		0.006656	0.006656	0.006656	0.006656																																					-71.8157	-71.8243
			-71.5249	-71.5348	-71.5249	-71.4793		0.006656	0.006656	0.006656	0.006656																																					-71.8156	-71.8242
			-71.5249	-71.5347	-71.5249	-71.4793		0.006656	0.006656	0.006656	0.006656																																					-71.8156	-71.8241
			-71.5248	-71.5347	-71.5248	-71.4793		0.006656	0.006656	0.006656	0.006656																																					-71.8155	-71.8241
			-71.5248	-71.5346	-71.5248	-71.4793		0.006656	0.006656	0.006656	0.006656																																					-71.8154	-71.824
			-71.5247	-71.5346	-71.5247	-71.4793		0.006656	0.006656	0.006656	0.006656																																					-71.8153	-71.8239
			-71.5246	-71.5345	-71.5246	-71.4793		0.006656	0.006656	0.006656	0.006656																																					-71.8153	-71.8239
			-71.5246	-71.5345	-71.5246	-71.4793		0.006656	0.006656	0.006656	0.006656																																					-71.8152	-71.8238
			-71.5245	-71.5344	-71.5245	-71.4793		0.006656	0.006656	0.006656	0.006656																																					-71.8151	-71.8237
			-71.5245	-71.5344	-71.5245	-71.4793		0.006656	0.006656	0.006656	0.006656																																					-71.815	-71.8237
			-71.5244	-71.5343	-71.5244	-71.4793		0.006656	0.006656	0.006656	0.006656																																					-71.815	-71.8236
			-71.5244	-71.5343	-71.5244	-71.4793		0.006656	0.006656	0.006656	0.006656																																					-71.8149	-71.8235
			-71.5243	-71.5342	-71.5243	-71.4793		0.006656	0.006656	0.006656	0.006656																																					-71.8148	-71.8234
			-71.5242	-71.5341	-71.5242	-71.4793		0.006656	0.006656	0.006656	0.006656																																					-71.7557	-71.7643
			-71.5241	-71.534	-71.5241	-71.4793		0.006656	0.006656	0.006656	0.006656																																					-71.6464	-71.655
			-71.5238	-71.5337	-71.5238	-71.479		0.006656	0.006656	0.006656	0.006656																																					-71.4935	-71.5021
			-71.5232	-71.5331	-71.5232	-71.4785		0.006657	0.006657	0.006657	0.006656																																					-71.303	-71.3116
			-71.5222	-71.5321	-71.5222	-71.4775		0.006657	0.006657	0.006657	0.006656																																					-71.0806	-71.0892
			-71.5204	-71.5303	-71.5204	-71.4757		0.006657	0.006657	0.006657	0.006656																																					-70.8315	-70.8401
			-71.5176	-71.5275	-71.5176	-71.4731		0.006657	0.006657	0.006657	0.006656																																					-70.5603	-70.5688
			-71.5138	-71.5237	-71.5138	-71.4693		0.006657	0.006657	0.006657	0.006656																																					-70.2711	-70.2795
			-71.5086	-71.5185	-71.5086	-71.4642		0.006658	0.006658	0.006658	0.006656																																					-69.9674	-69.9759
			-71.5019	-71.5118	-71.5019	-71.4576		0.006658	0.006658	0.006658	0.006656																																					-69.6526	-69.661
			-71.4935	-71.5034	-71.4935	-71.4493		0.006658	0.006658	0.006658	0.006656																																					-69.3292	-69.3376
			-71.4834	-71.4933	-71.4834	-71.4393		0.006659	0.006659	0.006659	0.006656																																					-68.9998	-69.0082
			-71.4714	-71.4814	-71.4714	-71.4275		0.006659	0.006659	0.006659	0.006656																																					-68.6664	-68.6747
			-71.4576	-71.4675	-71.4576	-71.4137		0.00666	0.00666	0.00666	0.006656																																					-68.3307	-68.339
			-71.4418	-71.4517	-71.4418	-71.3981		0.00666	0.00666	0.00666	0.006656																																					-67.9944	-68.0027
			-71.424	-71.4339	-71.424	-71.3805		0.00666	0.00666	0.00666	0.006656																																					-67.6587	-67.667
			-71.4043	-71.4142	-71.4043	-71.361		0.006661	0.006661	0.006661	0.006656																																					-67.3247	-67.333
			-71.3827	-71.3926	-71.3827	-71.3396		0.006662	0.006662	0.006662	0.006656																																					-66.9934	-67.0017
			-71.3592	-71.3691	-71.3592	-71.3163		0.006662	0.006662	0.006662	0.006656																																					-66.6657	-66.6739
			-71.3338	-71.3438	-71.3338	-71.2912		0.006663	0.006663	0.006663	0.006656																																					-66.342	-66.3503
			-71.3068	-71.3167	-71.3068	-71.2644		0.006663	0.006663	0.006663	0.006656																																					-66.0231	-66.0314
			-71.278	-71.2879	-71.278	-71.2359		0.006664	0.006664	0.006664	0.006656																																					-65.7093	-65.7176
			-71.2475	-71.2575	-71.2475	-71.2058		0.006665	0.006665	0.006665	0.006656																																					-65.4011	-65.4094
			-71.2156	-71.2255	-71.2156	-71.1742		0.006666	0.006666	0.006666	0.006656																																					-65.0986	-65.107
			-71.1821	-71.1921	-71.1821	-71.1411		0.006666	0.006666	0.006666	0.006656																																					-64.8022	-64.8107
			-71.1473	-71.1573	-71.1473	-71.1067		0.006667	0.006667	0.006667	0.006656																																					-64.5121	-64.5206
			-71.1112	-71.1212	-71.1112	-71.071		0.006668	0.006668	0.006668	0.006656																																					-64.2282	-64.2369
			-71.0739	-71.0838	-71.0739	-71.0341		0.006669	0.006669	0.006669	0.006656																																					-63.9509	-63.9596
			-71.0354	-71.0453	-71.0354	-70.996		0.00667	0.00667	0.00667	0.006656																																					-63.6799	-63.6888
			-70.9958	-71.0058	-70.9958	-70.957		0.006671	0.006671	0.006671	0.006656																																					-63.4155	-63.4245
			-70.9553	-70.9653	-70.9553	-70.917		0.006672	0.006672	0.006672	0.006656																																					-63.1576	-63.1668
			-70.9139	-70.9239	-70.9139	-70.8761		0.006673	0.006673	0.006673	0.006656																																					-62.9062	-62.9155
			-70.8717	-70.8816	-70.8717	-70.8344		0.006674	0.006674	0.006674	0.006656																																					-62.6611	-62.6707
			-70.8286	-70.8386	-70.8286	-70.792		0.006675	0.006675	0.006675	0.006656																																					-62.4225	-62.4323
			-70.7849	-70.7949	-70.7849	-70.7489		0.006676	0.006676	0.006676	0.006656																																					-62.1901	-62.2002
			-70.7406	-70.7506	-70.7406	-70.7052		0.006677	0.006677	0.006677	0.006656																																					-61.964	-61.9744
			-70.6958	-70.7058	-70.6958	-70.661		0.006678	0.006678	0.006678	0.006656																																					-61.744	-61.7547
			-70.6504	-70.6604	-70.6504	-70.6163		0.006679	0.006679	0.006679	0.006656																																					-61.53	-61.5411
			-70.6046	-70.6146	-70.6046	-70.5712		0.006681	0.006681	0.006681	0.006656																																					-61.3219	-61.3334
			-70.5584	-70.5684	-70.5584	-70.5258		0.006682	0.006682	0.006682	0.006656																																					-61.1196	-61.1316
			-70.5118	-70.5219	-70.5118	-70.48		0.006683	0.006683	0.006683	0.006656																																					-60.923	-60.9356
			-70.465	-70.4751	-70.465	-70.434		0.006684	0.006684	0.006684	0.006656																																					-60.732	-60.7451
			-70.418	-70.4281	-70.418	-70.3878		0.006686	0.006686	0.006686	0.006656																																					-60.5465	-60.5602
			-70.3708	-70.3809	-70.3708	-70.3414		0.006687	0.006687	0.006687	0.006656																																					-60.3663	-60.3807
			-70.3234	-70.3335	-70.3234	-70.295		0.006689	0.006689	0.006689	0.006656																																					-60.1914	-60.2065
			-70.2759	-70.2861	-70.2759	-70.2484		0.00669	0.00669	0.00669	0.006656																																					-60.0215	-60.0374
			-70.2284	-70.2386	-70.2284	-70.2018		0.006691	0.006691	0.006691	0.006656																																					-59.8567	-59.8734
			-70.1808	-70.191	-70.1808	-70.1552		0.006693	0.006693	0.006693	0.006656																																					-59.6968	-59.7144
			-70.1332	-70.1435	-70.1332	-70.1086		0.006694	0.006694	0.006694	0.006656																																					-59.5416	-59.5602
			-70.0857	-70.096	-70.0857	-70.0621		0.006696	0.006696	0.006696	0.006656																																					-59.3911	-59.4107
			-70.0382	-70.0485	-70.0382	-70.0156		0.006697	0.006697	0.006697	0.006656																																					-59.2451	-59.2659
			-69.9908	-70.0012	-69.9908	-69.9693		0.006699	0.006699	0.006699	0.006656																																					-59.1035	-59.1255
			-69.9436	-69.954	-69.9436	-69.9232		0.0067	0.0067	0.0067	0.006656																																					-58.9663	-58.9895
			-69.8965	-69.9069	-69.8965	-69.8772		0.006702	0.006702	0.006702	0.006656																																					-58.8332	-58.8579
			-69.8495	-69.86	-69.8495	-69.8314		0.006704	0.006704	0.006704	0.006656																																					-58.7043	-58.7304
			-69.8028	-69.8133	-69.8028	-69.7858		0.006705	0.006705	0.006705	0.006656																																					-58.5794	-58.607
			-69.7562	-69.7668	-69.7562	-69.7404		0.006707	0.006707	0.006707	0.006656																																					-58.4584	-58.4876
			-69.7099	-69.7206	-69.7099	-69.6953		0.006709	0.006709	0.006709	0.006656																																					-58.3411	-58.372
			-69.6638	-69.6746	-69.6638	-69.6505		0.00671	0.00671	0.00671	0.006656																																					-58.2276	-58.2603
			-69.618	-69.6288	-69.618	-69.6059		0.006712	0.006712	0.006712	0.006656																																					-58.1176	-58.1522
			-69.5725	-69.5834	-69.5725	-69.5617		0.006714	0.006714	0.006714	0.006656																																					-58.0112	-58.0478
			-69.5272	-69.5383	-69.5272	-69.5178		0.006715	0.006715	0.006715	0.006656																																					-57.9082	-57.9468
			-69.4823	-69.4934	-69.4823	-69.4742		0.006717	0.006717	0.006717	0.006656																																					-57.8085	-57.8493
			-69.4377	-69.4489	-69.4377	-69.431		0.006719	0.006719	0.006719	0.006656																																					-57.712	-57.7551
			-69.3934	-69.4047	-69.3934	-69.3881		0.006721	0.006721	0.006721	0.006656																																					-57.6187	-57.6642
			-69.3495	-69.3609	-69.3495	-69.3455		0.006723	0.006723	0.006723	0.006656																																					-57.5285	-57.5764
			-69.3059	-69.3174	-69.3059	-69.3034		0.006725	0.006724	0.006725	0.006656																																					-57.4412	-57.4918
			-69.2627	-69.2743	-69.2627	-69.2616		0.006726	0.006726	0.006726	0.006656																																					-57.3569	-57.4101
			-69.2199	-69.2316	-69.2199	-69.2202		0.006728	0.006728	0.006728	0.006656																																					-57.2753	-57.3313
			-69.1774	-69.1893	-69.1774	-69.1793		0.00673	0.00673	0.00673	0.006656																																					-57.1966	-57.2554
			-69.1353	-69.1474	-69.1353	-69.1387		0.006732	0.006732	0.006732	0.006656																																					-57.1204	-57.1823
			-69.0936	-69.1058	-69.0936	-69.0985		0.006734	0.006734	0.006734	0.006656																																					-57.0469	-57.1119
			-69.0523	-69.0647	-69.0523	-69.0588		0.006736	0.006736	0.006736	0.006656																																					-56.976	-57.0441
			-69.0114	-69.0239	-69.0114	-69.0194		0.006738	0.006738	0.006738	0.006656																																					-56.9074	-56.9789
			-68.971	-68.9836	-68.971	-68.9805		0.00674	0.00674	0.00674	0.006656																																					-56.8413	-56.9162
			-68.9309	-68.9437	-68.9309	-68.9421		0.006742	0.006742	0.006742	0.006656																																					-56.7775	-56.8559
			-68.8912	-68.9042	-68.8912	-68.904		0.006744	0.006744	0.006744	0.006656																																					-56.716	-56.798
			-68.852	-68.8652	-68.852	-68.8664		0.006746	0.006745	0.006746	0.006656																																					-56.6567	-56.7423
			-68.8131	-68.8266	-68.8131	-68.8292		0.006748	0.006747	0.006748	0.006656																																					-56.5995	-56.689
			-68.7747	-68.7884	-68.7747	-68.7925		0.00675	0.006749	0.00675	0.006656																																					-56.5445	-56.6378
			-68.7368	-68.7506	-68.7368	-68.7562		0.006752	0.006751	0.006752	0.006656																																					-56.4914	-56.5888
			-68.6992	-68.7133	-68.6992	-68.7204		0.006754	0.006754	0.006754	0.006656																																					-56.4403	-56.5418
			-68.6621	-68.6764	-68.6621	-68.685		0.006756	0.006756	0.006756	0.006656																																					-56.3912	-56.4968
			-68.6254	-68.64	-68.6254	-68.65		0.006758	0.006758	0.006758	0.006656																																					-56.3439	-56.4539
			-68.5891	-68.6039	-68.5891	-68.6155		0.00676	0.00676	0.00676	0.006656																																					-56.2985	-56.4128
			-68.5532	-68.5684	-68.5532	-68.5814		0.006762	0.006762	0.006762	0.006656																																					-56.2548	-56.3736
			-68.5178	-68.5332	-68.5178	-68.5478		0.006764	0.006764	0.006764	0.006656																																					-56.2128	-56.3362
			-68.4828	-68.4985	-68.4828	-68.5146		0.006766	0.006766	0.006766	0.006656																																					-56.1725	-56.3006
			-68.4483	-68.4643	-68.4483	-68.4818		0.006768	0.006768	0.006768	0.006656																																					-56.1339	-56.2666
			-68.4141	-68.4305	-68.4141	-68.4495		0.00677	0.00677	0.00677	0.006656																																					-56.0968	-56.2344
			-68.3804	-68.3971	-68.3804	-68.4176		0.006772	0.006772	0.006772	0.006656																																					-56.0613	-56.2038
			-68.3471	-68.3641	-68.3471	-68.3862		0.006775	0.006774	0.006775	0.006656																																					-56.0273	-56.1748
			-68.3142	-68.3316	-68.3142	-68.3552		0.006777	0.006776	0.006777	0.006656																																					-55.9947	-56.1473
			-68.2818	-68.2995	-68.2818	-68.3246		0.006779	0.006778	0.006779	0.006656																																					-55.9636	-56.1213
			-68.2498	-68.2679	-68.2498	-68.2945		0.006781	0.006781	0.006781	0.006656																																					-55.9339	-56.0968
			-68.2181	-68.2366	-68.2181	-68.2648		0.006783	0.006783	0.006783	0.006656																																					-55.9055	-56.0738
			-68.1869	-68.2058	-68.1869	-68.2355		0.006785	0.006785	0.006785	0.006656																																					-55.8784	-56.0521
			-68.1561	-68.1755	-68.1561	-68.2066		0.006787	0.006787	0.006787	0.006656																																					-55.8526	-56.0317
			-68.1258	-68.1455	-68.1258	-68.1782		0.00679	0.006789	0.00679	0.006656																																					-55.8281	-56.0127
			-68.0958	-68.116	-68.0958	-68.1501		0.006792	0.006791	0.006792	0.006656																																					-55.8047	-55.995
			-68.0662	-68.0869	-68.0662	-68.1225		0.006794	0.006793	0.006794	0.006656																																					-55.7826	-55.9785
			-68.037	-68.0582	-68.037	-68.0953		0.006796	0.006796	0.006796	0.006656																																					-55.7616	-55.9632
			-68.0083	-68.0299	-68.0083	-68.0686		0.006798	0.006798	0.006798	0.006656																																					-55.7417	-55.9491
			-67.9799	-68.002	-67.9799	-68.0422		0.0068	0.0068	0.0068	0.006656																																					-55.7229	-55.9362
			-67.9519	-67.9745	-67.9519	-68.0162		0.006803	0.006802	0.006803	0.006656																																					-55.7052	-55.9244
			-67.9243	-67.9474	-67.9243	-67.9906		0.006805	0.006804	0.006805	0.006656																																					-55.6885	-55.9137
			-67.8971	-67.9208	-67.8971	-67.9655		0.006807	0.006806	0.006807	0.006656																																					-55.6728	-55.904
			-67.8703	-67.8945	-67.8703	-67.9407		0.006809	0.006809	0.006809	0.006656																																					-55.6581	-55.8954
			-67.8439	-67.8686	-67.8439	-67.9163		0.006812	0.006811	0.006812	0.006656																																					-55.6443	-55.8878
			-67.8178	-67.8431	-67.8178	-67.8923		0.006814	0.006813	0.006814	0.006656																																					-55.6315	-55.8812
			-67.7921	-67.818	-67.7921	-67.8686		0.006816	0.006815	0.006816	0.006656																																					-55.6196	-55.8755
			-67.7668	-67.7933	-67.7668	-67.8454		0.006818	0.006817	0.006818	0.006656																																					-55.6086	-55.8708
			-67.7418	-67.7689	-67.7418	-67.8225		0.00682	0.00682	0.00682	0.006656																																					-55.5984	-55.867
			-67.7172	-67.7449	-67.7172	-67.8		0.006823	0.006822	0.006823	0.006656																																					-55.5891	-55.8641
			-67.693	-67.7213	-67.693	-67.7779		0.006825	0.006824	0.006825	0.006656																																					-55.5806	-55.862
			-67.6691	-67.6981	-67.6691	-67.7561		0.006827	0.006826	0.006827	0.006656																																					-55.5728	-55.8608
			-67.6456	-67.6753	-67.6456	-67.7347		0.006829	0.006828	0.006829	0.006656																																					-55.5659	-55.8604
			-67.6224	-67.6528	-67.6224	-67.7137		0.006832	0.006831	0.006832	0.006656																																					-55.5597	-55.8608
			-67.5996	-67.6306	-67.5996	-67.693		0.006834	0.006833	0.006834	0.006656																																					-55.5542	-55.8619
			-67.5771	-67.6088	-67.5771	-67.6726		0.006836	0.006835	0.006836	0.006656																																					-55.5495	-55.8639
			-67.5549	-67.5874	-67.5549	-67.6526		0.006838	0.006837	0.006838	0.006656																																					-55.5454	-55.8665
			-67.5331	-67.5663	-67.5331	-67.6329		0.006841	0.006839	0.006841	0.006656																																					-55.5421	-55.8699
			-67.5116	-67.5455	-67.5116	-67.6136		0.006843	0.006842	0.006843	0.006656																																					-55.5394	-55.874
			-67.4905	-67.5251	-67.4905	-67.5946		0.006845	0.006844	0.006845	0.006656																																					-55.5373	-55.8788
			-67.4696	-67.5051	-67.4696	-67.576		0.006847	0.006846	0.006847	0.006656																																					-55.5359	-55.8843
			-67.4491	-67.4853	-67.4491	-67.5576		0.00685	0.006848	0.00685	0.006656																																					-55.5351	-55.8904
			-67.4289	-67.4659	-67.4289	-67.5396		0.006852	0.00685	0.006852	0.006656																																					-55.5348	-55.8971
			-67.409	-67.4468	-67.409	-67.522		0.006854	0.006853	0.006854	0.006656																																					-55.5352	-55.9044
			-67.3894	-67.4281	-67.3894	-67.5046		0.006856	0.006855	0.006856	0.006656																																					-55.5361	-55.9124
			-67.3702	-67.4096	-67.3702	-67.4875		0.006859	0.006857	0.006859	0.006656																																					-55.5375	-55.9209
			-67.3512	-67.3915	-67.3512	-67.4708		0.006861	0.006859	0.006861	0.006656																																					-55.5395	-55.93
			-67.3325	-67.3736	-67.3325	-67.4543		0.006863	0.006861	0.006863	0.006656																																					-55.542	-55.9397
			-67.3141	-67.3561	-67.3141	-67.4382		0.006865	0.006864	0.006865	0.006656																																					-55.5451	-55.9499
			-67.296	-67.3389	-67.296	-67.4223		0.006868	0.006866	0.006868	0.006656																																					-55.5486	-55.9606
			-67.2782	-67.322	-67.2782	-67.4068		0.00687	0.006868	0.00687	0.006656																																					-55.5525	-55.9718
			-67.2607	-67.3054	-67.2607	-67.3915		0.006872	0.00687	0.006872	0.006656																																					-55.557	-55.9836
			-67.2435	-67.2891	-67.2435	-67.3766		0.006874	0.006872	0.006874	0.006656																																					-55.5618	-55.9958
			-67.2265	-67.273	-67.2265	-67.3619		0.006877	0.006875	0.006877	0.006656																																					-55.5672	-56.0085
			-67.2098	-67.2573	-67.2098	-67.3475		0.006879	0.006877	0.006879	0.006656																																					-55.5729	-56.0217
			-67.1934	-67.2418	-67.1934	-67.3333		0.006881	0.006879	0.006881	0.006656																																					-55.579	-56.0353
			-67.1773	-67.2266	-67.1773	-67.3195		0.006883	0.006881	0.006883	0.006656																																					-55.5856	-56.0494
			-67.1614	-67.2117	-67.1614	-67.3059		0.006886	0.006883	0.006886	0.006656																																					-55.5925	-56.0639
			-67.1457	-67.1971	-67.1457	-67.2926		0.006888	0.006886	0.006888	0.006656																																					-55.5998	-56.0788
			-67.1304	-67.1827	-67.1304	-67.2795		0.00689	0.006888	0.00689	0.006656																																					-55.6074	-56.0941
			-67.1153	-67.1686	-67.1153	-67.2667		0.006892	0.00689	0.006892	0.006656																																					-55.6154	-56.1099
			-67.1004	-67.1547	-67.1004	-67.2542		0.006895	0.006892	0.006895	0.006656																																					-55.6238	-56.126
			-67.0858	-67.1412	-67.0858	-67.2419		0.006897	0.006894	0.006897	0.006656																																					-55.6324	-56.1425
			-67.0714	-67.1278	-67.0714	-67.2299		0.006899	0.006897	0.006899	0.006656																																					-55.6413	-56.1593
			-67.0573	-67.1147	-67.0573	-67.2181		0.006901	0.006899	0.006901	0.006656																																					-55.6506	-56.1765
			-67.0434	-67.1019	-67.0434	-67.2066		0.006904	0.006901	0.006904	0.006656																																					-55.6601	-56.1941
			-67.0297	-67.0893	-67.0297	-67.1953		0.006906	0.006903	0.006906	0.006656																																					-55.6699	-56.212
			-67.0163	-67.077	-67.0163	-67.1842		0.006908	0.006905	0.006908	0.006656																																					-55.6799	-56.2303
			-67.0031	-67.0649	-67.0031	-67.1734		0.00691	0.006908	0.00691	0.006656																																					-55.6902	-56.2488
			-66.9901	-67.053	-66.9901	-67.1628		0.006913	0.00691	0.006913	0.006656																																					-55.7007	-56.2677
			-66.9774	-67.0414	-66.9774	-67.1524		0.006915	0.006912	0.006915	0.006656																																					-55.7114	-56.2869
			-66.9649	-67.03	-66.9649	-67.1423		0.006917	0.006914	0.006917	0.006656																																					-55.7224	-56.3063
			-66.9526	-67.0188	-66.9526	-67.1324		0.006919	0.006916	0.006919	0.006656																																					-55.7334	-56.3261
			-66.9405	-67.0079	-66.9405	-67.1227		0.006922	0.006918	0.006922	0.006656																																					-55.7447	-56.3462
			-66.9286	-66.9971	-66.9286	-67.1132		0.006924	0.006921	0.006924	0.006656																																					-55.7561	-56.3665
			-66.9169	-66.9866	-66.9169	-67.1039		0.006926	0.006923	0.006926	0.006656																																					-55.7677	-56.3871
			-66.9054	-66.9763	-66.9054	-67.0949		0.006928	0.006925	0.006928	0.006656																																					-55.7793	-56.4079
			-66.8942	-66.9662	-66.8942	-67.086		0.006931	0.006927	0.006931	0.006656																																					-55.7911	-56.429
			-66.8831	-66.9564	-66.8831	-67.0774		0.006933	0.006929	0.006933	0.006656																																					-55.8029	-56.4504
			-66.8722	-66.9467	-66.8722	-67.069		0.006935	0.006931	0.006935	0.006656																																					-55.8148	-56.472
			-66.8616	-66.9372	-66.8616	-67.0607		0.006937	0.006934	0.006937	0.006656																																					-55.8267	-56.4938
			-66.8511	-66.928	-66.8511	-67.0527		0.00694	0.006936	0.00694	0.006656																																					-55.8386	-56.5159
			-66.8408	-66.9189	-66.8408	-67.0449		0.006942	0.006938	0.006942	0.006656																																					-55.8505	-56.5382
			-66.8307	-66.9101	-66.8307	-67.0372		0.006944	0.00694	0.006944	0.006656																																					-55.8624	-56.5606
			-66.8208	-66.9014	-66.8208	-67.0298		0.006946	0.006942	0.006946	0.006656																																					-55.8741	-56.5833
			-66.811	-66.8929	-66.811	-67.0225		0.006949	0.006944	0.006949	0.006656																																					-55.8858	-56.6062
			-66.8015	-66.8846	-66.8015	-67.0154		0.006951	0.006946	0.006951	0.006656																																					-55.8974	-56.6293
			-66.7921	-66.8765	-66.7921	-67.0085		0.006953	0.006949	0.006953	0.006656																																					-55.9088	-56.6526
			-66.7829	-66.8686	-66.7829	-67.0018		0.006955	0.006951	0.006955	0.006656																																					-55.9199	-56.6761
			-66.7739	-66.8609	-66.7739	-66.9953		0.006957	0.006953	0.006957	0.006656																																					-55.9309	-56.6998
			-66.765	-66.8533	-66.765	-66.9889		0.00696	0.006955	0.00696	0.006656																																					-55.9415	-56.7236
			-66.7563	-66.8459	-66.7563	-66.9828		0.006962	0.006957	0.006962	0.006656																																					-55.9519	-56.7476
			-66.7478	-66.8387	-66.7478	-66.9767		0.006964	0.006959	0.006964	0.006656																																					-55.9619	-56.7718
			-66.7394	-66.8317	-66.7394	-66.9709		0.006966	0.006961	0.006966	0.006656																																					-55.9715	-56.7961
			-66.7312	-66.8248	-66.7312	-66.9652		0.006969	0.006964	0.006969	0.006656																																					-55.9807	-56.8206
			-66.7231	-66.8182	-66.7231	-66.9597		0.006971	0.006966	0.006971	0.006656																																					-55.9895	-56.8452
			-66.7152	-66.8116	-66.7152	-66.9544		0.006973	0.006968	0.006973	0.006656																																					-55.9977	-56.87
			-66.7075	-66.8053	-66.7075	-66.9492		0.006975	0.00697	0.006975	0.006656																																					-56.0053	-56.8949
			-66.6999	-66.7991	-66.6999	-66.9441		0.006977	0.006972	0.006977	0.006656																																					-56.0124	-56.92
			-66.6924	-66.793	-66.6924	-66.9393		0.00698	0.006974	0.00698	0.006656																																					-56.0189	-56.9452
			-66.6851	-66.7871	-66.6851	-66.9345		0.006982	0.006976	0.006982	0.006656																																					-56.0246	-56.9705
			-66.6779	-66.7814	-66.6779	-66.93		0.006984	0.006978	0.006984	0.006656																																					-56.0297	-56.996
			-66.6709	-66.7758	-66.6709	-66.9256		0.006986	0.00698	0.006986	0.006656																																					-56.0341	-57.0215
			-66.664	-66.7704	-66.664	-66.9213		0.006988	0.006982	0.006988	0.006656																																					-56.0377	-57.0472
			-66.6573	-66.7651	-66.6573	-66.9171		0.006991	0.006985	0.006991	0.006656																																					-56.0405	-57.073
			-66.6506	-66.7599	-66.6506	-66.9132		0.006993	0.006987	0.006993	0.006656																																					-56.0424	-57.0989
			-66.6441	-66.7549	-66.6441	-66.9093		0.006995	0.006989	0.006995	0.006656																																					-56.0436	-57.125
			-66.6378	-66.7501	-66.6378	-66.9056		0.006997	0.006991	0.006997	0.006656																																					-56.0438	-57.1511
			-66.6315	-66.7454	-66.6315	-66.902		0.006999	0.006993	0.006999	0.006656																																					-56.0433	-57.1773
			-66.6254	-66.7408	-66.6254	-66.8986		0.007002	0.006995	0.007002	0.006656																																					-56.0418	-57.2036
			-66.6194	-66.7364	-66.6194	-66.8953		0.007004	0.006997	0.007004	0.006656																																					-56.0394	-57.23
			-66.6135	-66.7321	-66.6135	-66.8922		0.007006	0.006999	0.007006	0.006656																																					-56.0362	-57.2565
			-66.6077	-66.7279	-66.6077	-66.8891		0.007008	0.007001	0.007008	0.006656																																					-56.032	-57.2831
			-66.602	-66.7238	-66.602	-66.8862		0.00701	0.007003	0.00701	0.006656																																					-56.027	-57.3097
			-66.5964	-66.7199	-66.5964	-66.8834		0.007013	0.007005	0.007013	0.006656																																					-56.0212	-57.3364
			-66.591	-66.7162	-66.591	-66.8808		0.007015	0.007007	0.007015	0.006656																																					-56.0145	-57.3633
			-66.5856	-66.7125	-66.5856	-66.8782		0.007017	0.007009	0.007017	0.006656																																					-56.007	-57.3901
			-66.5804	-66.709	-66.5804	-66.8758		0.007019	0.007011	0.007019	0.006656																																					-55.9987	-57.4171
			-66.5752	-66.7056	-66.5752	-66.8735		0.007022	0.007013	0.007022	0.006656																																					-55.9897	-57.4441
			-66.5701	-66.7023	-66.5701	-66.8714		0.007024	0.007015	0.007024	0.006656																																					-55.9801	-57.4712
			-66.5651	-66.6991	-66.5651	-66.8693		0.007026	0.007017	0.007026	0.006656																																					-55.9698	-57.4983
			-66.5602	-66.696	-66.5602	-66.8673		0.007028	0.007019	0.007028	0.006656																																					-55.959	-57.5255
			-66.5554	-66.6931	-66.5554	-66.8655		0.00703	0.007022	0.00703	0.006656																																					-55.9476	-57.5528
			-66.5507	-66.6903	-66.5507	-66.8638		0.007033	0.007024	0.007033	0.006656																																					-55.9359	-57.5801
			-66.546	-66.6876	-66.546	-66.8622		0.007035	0.007026	0.007035	0.006656																																					-55.9238	-57.6074
			-66.5415	-66.685	-66.5415	-66.8607		0.007037	0.007028	0.007037	0.006656																																					-55.9113	-57.6348
			-66.537	-66.6825	-66.537	-66.8593		0.007039	0.00703	0.007039	0.006656																																					-55.8987	-57.6623
			-66.5325	-66.6801	-66.5325	-66.858		0.007041	0.007032	0.007041	0.006656																																					-55.886	-57.6898
			-66.5282	-66.6778	-66.5282	-66.8568		0.007044	0.007034	0.007044	0.006656																																					-55.8731	-57.7173
			-66.5239	-66.6757	-66.5239	-66.8557		0.007046	0.007036	0.007046	0.006656																																					-55.8603	-57.7449
			-66.5196	-66.6736	-66.5196	-66.8547		0.007048	0.007038	0.007048	0.006656																																					-55.8476	-57.7725
			-66.5154	-66.6716	-66.5154	-66.8538		0.00705	0.00704	0.00705	0.006656																																					-55.835	-57.8001
			-66.5113	-66.6698	-66.5113	-66.853		0.007053	0.007042	0.007053	0.006656																																					-55.8226	-57.8278
			-66.5072	-66.668	-66.5072	-66.8522		0.007055	0.007044	0.007055	0.006656																																					-55.8105	-57.8555
			-66.5032	-66.6663	-66.5032	-66.8516		0.007057	0.007046	0.007057	0.006656																																					-55.7987	-57.8832
			-66.4992	-66.6648	-66.4992	-66.8511		0.007059	0.007048	0.007059	0.006656																																					-55.7872	-57.911
			-66.4953	-66.6633	-66.4953	-66.8506		0.007061	0.00705	0.007061	0.006656																																					-55.7761	-57.9387
			-66.4915	-66.6619	-66.4915	-66.8503		0.007064	0.007052	0.007064	0.006656																																					-55.7654	-57.9665
			-66.4876	-66.6606	-66.4876	-66.85		0.007066	0.007053	0.007066	0.006656																																					-55.7551	-57.9943
			-66.4838	-66.6594	-66.4838	-66.8498		0.007068	0.007055	0.007068	0.006656																																					-55.7452	-58.0222
			-66.4801	-66.6583	-66.4801	-66.8497		0.00707	0.007057	0.00707	0.006656																																					-55.7357	-58.05
			-66.4764	-66.6573	-66.4764	-66.8497		0.007073	0.007059	0.007073	0.006656																																					-55.7266	-58.0779
			-66.4727	-66.6564	-66.4727	-66.8497		0.007075	0.007061	0.007075	0.006656																																					-55.7177	-58.1057
			-66.4691	-66.6555	-66.4691	-66.8499		0.007077	0.007063	0.007077	0.006656																																					-55.7091	-58.1336
			-66.4655	-66.6548	-66.4655	-66.8501		0.007079	0.007065	0.007079	0.006656																																					-55.7007	-58.1615
			-66.4619	-66.6541	-66.4619	-66.8503		0.007082	0.007067	0.007082	0.006656																																					-55.6924	-58.1894
			-66.4584	-66.6535	-66.4584	-66.8507		0.007084	0.007069	0.007084	0.006656																																					-55.6842	-58.2173
			-66.4549	-66.653	-66.4549	-66.8511		0.007086	0.007071	0.007086	0.006656																																					-55.6759	-58.2452
			-66.4515	-66.6526	-66.4515	-66.8516		0.007088	0.007073	0.007088	0.006656																																					-55.6674	-58.2731
			-66.448	-66.6522	-66.448	-66.8521		0.00709	0.007075	0.00709	0.006656																																					-55.6587	-58.301
			-66.4446	-66.6519	-66.4446	-66.8528		0.007093	0.007077	0.007093	0.006656																																					-55.6496	-58.3289
			-66.4412	-66.6517	-66.4412	-66.8534		0.007095	0.007079	0.007095	0.006656																																					-55.64	-58.3568
			-66.4379	-66.6516	-66.4379	-66.8542		0.007097	0.007081	0.007097	0.006656																																					-55.6298	-58.3847
			-66.4346	-66.6516	-66.4346	-66.855		0.007099	0.007083	0.007099	0.006656																																					-55.619	-58.4125
			-66.4313	-66.6516	-66.4313	-66.8558		0.007102	0.007085	0.007102	0.006656																																					-55.6073	-58.4404
			-66.428	-66.6517	-66.428	-66.8568		0.007104	0.007087	0.007104	0.006656																																					-55.5948	-58.4683
			-66.4248	-66.6519	-66.4248	-66.8577		0.007106	0.007088	0.007106	0.006656																																					-55.5814	-58.4961
			-66.4216	-66.6521	-66.4216	-66.8587		0.007108	0.00709	0.007108	0.006656																																					-55.5669	-58.524
			-66.4184	-66.6525	-66.4184	-66.8598		0.007111	0.007092	0.007111	0.006656																																					-55.5513	-58.5518
			-66.4153	-66.6529	-66.4153	-66.8609		0.007113	0.007094	0.007113	0.006656																																					-55.5346	-58.5796
			-66.4122	-66.6533	-66.4122	-66.8621		0.007115	0.007096	0.007115	0.006656																																					-55.5168	-58.6074
			-66.4091	-66.6538	-66.4091	-66.8633		0.007117	0.007098	0.007117	0.006656																																					-55.4978	-58.6352
			-66.406	-66.6544	-66.406	-66.8646		0.00712	0.0071	0.00712	0.006656																																					-55.4777	-58.663
			-66.4029	-66.6551	-66.4029	-66.8659		0.007122	0.007102	0.007122	0.006656																																					-55.4564	-58.6908
			-66.3999	-66.6558	-66.3999	-66.8672		0.007124	0.007104	0.007124	0.006656																																					-55.434	-58.7185
			-66.3969	-66.6566	-66.3969	-66.8686		0.007126	0.007105	0.007126	0.006656																																					-55.4106	-58.7462
			-66.3939	-66.6574	-66.3939	-66.87		0.007129	0.007107	0.007129	0.006656																																					-55.3863	-58.7739
			-66.3909	-66.6583	-66.3909	-66.8715		0.007131	0.007109	0.007131	0.006656																																					-55.361	-58.8016
			-66.3879	-66.6593	-66.3879	-66.873		0.007133	0.007111	0.007133	0.006656																																					-55.335	-58.8292
			-66.385	-66.6603	-66.385	-66.8745		0.007135	0.007113	0.007135	0.006656																																					-55.3084	-58.8568
			-66.3821	-66.6614	-66.3821	-66.8761		0.007138	0.007115	0.007138	0.006656																																					-55.2811	-58.8844
			-66.3791	-66.6625	-66.3791	-66.8777		0.00714	0.007117	0.00714	0.006656																																					-55.2535	-58.912
			-66.3762	-66.6637	-66.3762	-66.8793		0.007142	0.007119	0.007142	0.006656																																					-55.2256	-58.9395
			-66.3733	-66.665	-66.3733	-66.8809		0.007144	0.00712	0.007144	0.006656																																					-55.1976	-58.967
			-66.3704	-66.6663	-66.3704	-66.8826		0.007147	0.007122	0.007147	0.006656																																					-55.1696	-58.9945
			-66.3676	-66.6676	-66.3676	-66.8844		0.007149	0.007124	0.007149	0.006656																																					-55.1417	-59.0219
			-66.3647	-66.6691	-66.3647	-66.8861		0.007151	0.007126	0.007151	0.006656																																					-55.1142	-59.0493
			-66.3618	-66.6705	-66.3618	-66.8879		0.007153	0.007128	0.007153	0.006656																																					-55.0872	-59.0767
			-66.3589	-66.6721	-66.3589	-66.8897		0.007156	0.00713	0.007156	0.006656																																					-55.0609	-59.104
			-66.356	-66.6736	-66.356	-66.8915		0.007158	0.007131	0.007158	0.006656																																					-55.0353	-59.1313
			-66.3531	-66.6753	-66.3531	-66.8934		0.00716	0.007133	0.00716	0.006656																																					-55.0107	-59.1586
			-66.3503	-66.6769	-66.3503	-66.8953		0.007163	0.007135	0.007163	0.006656																																					-54.9872	-59.1859
			-66.3474	-66.6787	-66.3474	-66.8972		0.007165	0.007137	0.007165	0.006656																																					-54.965	-59.2131
			-66.3445	-66.6804	-66.3445	-66.8991		0.007167	0.007139	0.007167	0.006656																																					-54.9441	-59.2402
			-66.3415	-66.6823	-66.3415	-66.9011		0.00717	0.007141	0.00717	0.006656																																					-54.9247	-59.2674
			-66.3386	-66.6841	-66.3386	-66.9031		0.007172	0.007142	0.007172	0.006656																																					-54.9069	-59.2944
			-66.3357	-66.686	-66.3357	-66.9051		0.007174	0.007144	0.007174	0.006656																																					-54.8908	-59.3215
			-66.3327	-66.688	-66.3327	-66.9072		0.007176	0.007146	0.007176	0.006656																																					-54.8765	-59.3485
			-66.3298	-66.69	-66.3298	-66.9092		0.007179	0.007148	0.007179	0.006656																																					-54.8641	-59.3755
			-66.3268	-66.6921	-66.3268	-66.9113		0.007181	0.00715	0.007181	0.006656																																					-54.8537	-59.4024
			-66.3238	-66.6942	-66.3238	-66.9135		0.007183	0.007151	0.007183	0.006656																																					-54.8453	-59.4293
			-66.3208	-66.6963	-66.3208	-66.9156		0.007186	0.007153	0.007186	0.006656																																					-54.839	-59.4561
			-66.3178	-66.6985	-66.3178	-66.9178		0.007188	0.007155	0.007188	0.006656																																					-54.8348	-59.4829
			-66.3148	-66.7007	-66.3148	-66.92		0.00719	0.007157	0.00719	0.006656																																					-54.8327	-59.5096
			-66.3118	-66.703	-66.3118	-66.9223		0.007193	0.007159	0.007193	0.006656																																					-54.8328	-59.5363
			-66.3087	-66.7053	-66.3087	-66.9245		0.007195	0.00716	0.007195	0.006656																																					-54.835	-59.563
			-66.3057	-66.7076	-66.3057	-66.9268		0.007197	0.007162	0.007197	0.006656																																					-54.8394	-59.5896
			-66.3026	-66.71	-66.3026	-66.9292		0.007199	0.007164	0.007199	0.006656																																					-54.846	-59.6162
			-66.2996	-66.7124	-66.2996	-66.9315		0.007202	0.007166	0.007202	0.006656																																					-54.8546	-59.6427
			-66.2965	-66.7149	-66.2965	-66.9339		0.007204	0.007168	0.007204	0.006656																																					-54.8653	-59.6692
			-66.2934	-66.7174	-66.2934	-66.9364		0.007206	0.007169	0.007206	0.006656																																					-54.878	-59.6956
			-66.2904	-66.7199	-66.2904	-66.9388		0.007209	0.007171	0.007209	0.006656																																					-54.8927	-59.722
			-66.2873	-66.7225	-66.2873	-66.9413		0.007211	0.007173	0.007211	0.006656																																					-54.9094	-59.7483
			-66.2843	-66.7251	-66.2843	-66.9438		0.007213	0.007175	0.007213	0.006656																																					-54.9278	-59.7746
			-66.2812	-66.7277	-66.2812	-66.9464		0.007215	0.007176	0.007215	0.006656																																					-54.9481	-59.8008
			-66.2781	-66.7304	-66.2781	-66.949		0.007218	0.007178	0.007218	0.006656																																					-54.9701	-59.827
			-66.2751	-66.7331	-66.2751	-66.9516		0.00722	0.00718	0.00722	0.006656																																					-54.9937	-59.8531
			-66.2721	-66.7359	-66.2721	-66.9543		0.007222	0.007182	0.007222	0.006656																																					-55.0189	-59.8792
			-66.2691	-66.7387	-66.2691	-66.957		0.007224	0.007183	0.007224	0.006656																																					-55.0456	-59.9052
			-66.2661	-66.7415	-66.2661	-66.9597		0.007227	0.007185	0.007227	0.006656																																					-55.0737	-59.9311
			-66.2631	-66.7443	-66.2631	-66.9625		0.007229	0.007187	0.007229	0.006656																																					-55.1031	-59.9571
			-66.2602	-66.7472	-66.2602	-66.9653		0.007231	0.007189	0.007231	0.006656																																					-55.1337	-59.9829
			-66.2573	-66.7501	-66.2573	-66.9681		0.007233	0.00719	0.007233	0.006656																																					-55.1655	-60.0087
			-66.2544	-66.753	-66.2544	-66.971		0.007236	0.007192	0.007236	0.006656																																					-55.1984	-60.0345
			-66.2516	-66.756	-66.2516	-66.9739		0.007238	0.007194	0.007238	0.006656																																					-55.2323	-60.0602
			-66.2488	-66.759	-66.2488	-66.9768		0.00724	0.007196	0.00724	0.006656																																					-55.2672	-60.0858
			-66.246	-66.762	-66.246	-66.9798		0.007242	0.007197	0.007242	0.006656																																					-55.3029	-60.1114
			-66.2433	-66.7651	-66.2433	-66.9829		0.007244	0.007199	0.007244	0.006656																																					-55.3394	-60.137
			-66.2406	-66.7682	-66.2406	-66.9859		0.007247	0.007201	0.007247	0.006656																																					-55.3766	-60.1624
			-66.2379	-66.7713	-66.2379	-66.989		0.007249	0.007202	0.007249	0.006656																																					-55.4145	-60.1879
			-66.2354	-66.7744	-66.2354	-66.9922		0.007251	0.007204	0.007251	0.006656																																					-55.4529	-60.2132
			-66.2328	-66.7776	-66.2328	-66.9954		0.007253	0.007206	0.007253	0.006656																																					-55.492	-60.2385
			-66.2303	-66.7808	-66.2303	-66.9986		0.007255	0.007208	0.007255	0.006656																																					-55.5315	-60.2638
			-66.2279	-66.784	-66.2279	-67.0018		0.007258	0.007209	0.007258	0.006656																																					-55.5714	-60.289
			-66.2255	-66.7872	-66.2255	-67.0051		0.00726	0.007211	0.00726	0.006656																																					-55.6117	-60.3141
			-66.2232	-66.7905	-66.2232	-67.0085		0.007262	0.007213	0.007262	0.006656																																					-55.6523	-60.3392
			-66.221	-66.7938	-66.221	-67.0118		0.007264	0.007214	0.007264	0.006656																																					-55.6933	-60.3643
			-66.2188	-66.7971	-66.2188	-67.0152		0.007266	0.007216	0.007266	0.006656																																					-55.7344	-60.3892
			-66.2166	-66.8005	-66.2166	-67.0187		0.007268	0.007218	0.007268	0.006656																																					-55.7758	-60.4141
			-66.2146	-66.8038	-66.2146	-67.0222		0.00727	0.007219	0.00727	0.006656																																					-55.8173	-60.439
			-66.2126	-66.8072	-66.2126	-67.0257		0.007273	0.007221	0.007273	0.006656																																					-55.859	-60.4638
			-66.2106	-66.8106	-66.2106	-67.0292		0.007275	0.007223	0.007275	0.006656																																					-55.9007	-60.4885
			-66.2088	-66.8141	-66.2088	-67.0328		0.007277	0.007224	0.007277	0.006656																																					-55.9425	-60.5132
			-66.2069	-66.8175	-66.2069	-67.0365		0.007279	0.007226	0.007279	0.006656																																					-55.9843	-60.5378
			-66.2052	-66.821	-66.2052	-67.0401		0.007281	0.007228	0.007281	0.006656																																					-56.0261	-60.5624
			-66.2035	-66.8245	-66.2035	-67.0438		0.007283	0.007229	0.007283	0.006656																																					-56.0679	-60.5869
			-66.2019	-66.828	-66.2019	-67.0476		0.007285	0.007231	0.007285	0.006656																																					-56.1096	-60.6113
			-66.2003	-66.8316	-66.2003	-67.0514		0.007287	0.007233	0.007287	0.006656																																					-56.1512	-60.6357
			-66.1989	-66.8351	-66.1989	-67.0552		0.007289	0.007234	0.007289	0.006656																																					-56.1928	-60.66
			-66.1974	-66.8387	-66.1974	-67.059		0.007292	0.007236	0.007292	0.006656																																					-56.2342	-60.6843
			-66.1961	-66.8423	-66.1961	-67.0629		0.007294	0.007238	0.007294	0.006656																																					-56.2754	-60.7085
			-66.1947	-66.8459	-66.1947	-67.0668		0.007296	0.007239	0.007296	0.006656																																					-56.3165	-60.7326
			-66.1935	-66.8496	-66.1935	-67.0707		0.007298	0.007241	0.007298	0.006656																																					-56.3574	-60.7567
			-66.1923	-66.8532	-66.1923	-67.0747		0.0073	0.007243	0.0073	0.006656																																					-56.3981	-60.7807
			-66.1912	-66.8569	-66.1912	-67.0787		0.007302	0.007244	0.007302	0.006656																																					-56.4386	-60.8047
			-66.1901	-66.8606	-66.1901	-67.0828		0.007304	0.007246	0.007304	0.006656																																					-56.4788	-60.8286
			-66.1891	-66.8643	-66.1891	-67.0869		0.007306	0.007248	0.007306	0.006656																																					-56.5188	-60.8524
			-66.1881	-66.8681	-66.1881	-67.091		0.007308	0.007249	0.007308	0.006656																																					-56.5586	-60.8762
			-66.1872	-66.8718	-66.1872	-67.0951		0.00731	0.007251	0.00731	0.006656																																					-56.598	-60.8999
			-66.1863	-66.8756	-66.1863	-67.0993		0.007312	0.007252	0.007312	0.006656																																					-56.6371	-60.9235
			-66.1855	-66.8793	-66.1855	-67.1035		0.007314	0.007254	0.007314	0.006656																																					-56.676	-60.9471
			-66.1847	-66.8831	-66.1847	-67.1077		0.007316	0.007256	0.007316	0.006656																																					-56.7145	-60.9707
			-66.184	-66.8869	-66.184	-67.112		0.007318	0.007257	0.007318	0.006656																																					-56.7527	-60.9941
			-66.1833	-66.8908	-66.1833	-67.1163		0.00732	0.007259	0.00732	0.006656																																					-56.7905	-61.0175
			-66.1826	-66.8946	-66.1826	-67.1206		0.007322	0.007261	0.007322	0.006656																																					-56.8281	-61.0409
			-66.182	-66.8985	-66.182	-67.125		0.007324	0.007262	0.007324	0.006656																																					-56.8652	-61.0642
			-66.1814	-66.9023	-66.1814	-67.1293		0.007326	0.007264	0.007326	0.006656																																					-56.902	-61.0874
			-66.1809	-66.9062	-66.1809	-67.1337		0.007328	0.007265	0.007328	0.006656																																					-56.9385	-61.1105
			-66.1804	-66.9101	-66.1804	-67.1382		0.00733	0.007267	0.00733	0.006656																																					-56.9746	-61.1336
			-66.1799	-66.914	-66.1799	-67.1426		0.007332	0.007269	0.007332	0.006656																																					-57.0103	-61.1567
			-66.1794	-66.9179	-66.1794	-67.1471		0.007334	0.00727	0.007334	0.006656																																					-57.0456	-61.1796
			-66.179	-66.9219	-66.179	-67.1516		0.007336	0.007272	0.007336	0.006656																																					-57.0806	-61.2025
			-66.1786	-66.9258	-66.1786	-67.1562		0.007338	0.007273	0.007338	0.006656																																					-57.1151	-61.2254
			-66.1782	-66.9298	-66.1782	-67.1607		0.00734	0.007275	0.00734	0.006656																																					-57.1493	-61.2482
			-66.1779	-66.9338	-66.1779	-67.1653		0.007342	0.007277	0.007342	0.006656																																					-57.1832	-61.2709
			-66.1775	-66.9378	-66.1775	-67.1699		0.007344	0.007278	0.007344	0.006656																																					-57.2166	-61.2936
			-66.1772	-66.9418	-66.1772	-67.1745		0.007346	0.00728	0.007346	0.006656																																					-57.2497	-61.3162
			-66.1769	-66.9458	-66.1769	-67.1792		0.007348	0.007281	0.007348	0.006656																																					-57.2824	-61.3387
			-66.1766	-66.9498	-66.1766	-67.1839		0.00735	0.007283	0.00735	0.006656																																					-57.3147	-61.3612
			-66.1764	-66.9538	-66.1764	-67.1886		0.007352	0.007285	0.007352	0.006656																																					-57.3467	-61.3836
			-66.1761	-66.9579	-66.1761	-67.1933		0.007354	0.007286	0.007354	0.006656																																					-57.3783	-61.4059
			-66.1759	-66.9619	-66.1759	-67.198		0.007356	0.007288	0.007356	0.006656																																					-57.4095	-61.4282
			-66.1757	-66.966	-66.1757	-67.2028		0.007358	0.007289	0.007358	0.006656																																					-57.4404	-61.4504
			-66.1755	-66.9701	-66.1755	-67.2076		0.007359	0.007291	0.007359	0.006656																																					-57.4709	-61.4726
			-66.1753	-66.9741	-66.1753	-67.2124		0.007361	0.007292	0.007361	0.006656																																					-57.5011	-61.4947
			-66.1751	-66.9782	-66.1751	-67.2172		0.007363	0.007294	0.007363	0.006656																																					-57.531	-61.5167
			-66.175	-66.9823	-66.175	-67.2221		0.007365	0.007296	0.007365	0.006656																																					-57.5605	-61.5387
			-66.1748	-66.9865	-66.1748	-67.2269		0.007367	0.007297	0.007367	0.006656																																					-57.5898	-61.5606
			-66.1747	-66.9906	-66.1747	-67.2318		0.007369	0.007299	0.007369	0.006656																																					-57.6187	-61.5825
			-66.1746	-66.9947	-66.1746	-67.2367		0.007371	0.0073	0.007371	0.006656																																					-57.6473	-61.6043
			-66.1745	-66.9988	-66.1745	-67.2416		0.007373	0.007302	0.007373	0.006656																																					-57.6756	-61.626
			-66.1744	-67.003	-66.1744	-67.2466		0.007375	0.007303	0.007375	0.006656																																					-57.7037	-61.6476
			-66.1743	-67.0071	-66.1743	-67.2515		0.007377	0.007305	0.007377	0.006656																																					-57.7314	-61.6692
			-66.1743	-67.0113	-66.1743	-67.2565		0.007379	0.007306	0.007379	0.006656																																					-57.7589	-61.6908
			-66.1742	-67.0155	-66.1742	-67.2615		0.00738	0.007308	0.00738	0.006656																																					-57.7862	-61.7123
			-66.1742	-67.0197	-66.1742	-67.2665		0.007382	0.00731	0.007382	0.006656																																					-57.8132	-61.7337
			-66.1742	-67.0238	-66.1742	-67.2715		0.007384	0.007311	0.007384	0.006656																																					-57.8399	-61.755
			-66.1743	-67.028	-66.1743	-67.2765		0.007386	0.007313	0.007386	0.006656																																					-57.8665	-61.7763
			-66.1743	-67.0322	-66.1743	-67.2816		0.007388	0.007314	0.007388	0.006656																																					-57.8928	-61.7976
			-66.1744	-67.0365	-66.1744	-67.2866		0.00739	0.007316	0.00739	0.006656																																					-57.9189	-61.8187
			-66.1745	-67.0407	-66.1745	-67.2917		0.007392	0.007317	0.007392	0.006656																																					-57.9448	-61.8398
			-66.1746	-67.0449	-66.1746	-67.2968		0.007394	0.007319	0.007394	0.006656																																					-57.9705	-61.8609
			-66.1748	-67.0491	-66.1748	-67.3019		0.007396	0.00732	0.007396	0.006656																																					-57.9961	-61.8819
			-66.1749	-67.0534	-66.1749	-67.307		0.007397	0.007322	0.007397	0.006656																																					-58.0215	-61.9028
			-66.1751	-67.0576	-66.1751	-67.3121		0.007399	0.007323	0.007399	0.006656																																					-58.0467	-61.9236
			-66.1754	-67.0618	-66.1754	-67.3173		0.007401	0.007325	0.007401	0.006656																																					-58.0717	-61.9444
			-66.1757	-67.0661	-66.1757	-67.3224		0.007403	0.007326	0.007403	0.006656																																					-58.0967	-61.9652
			-66.176	-67.0703	-66.176	-67.3276		0.007405	0.007328	0.007405	0.006656																																					-58.1214	-61.9859
			-66.1763	-67.0746	-66.1763	-67.3328		0.007407	0.007329	0.007407	0.006656																																					-58.1461	-62.0065
			-66.1767	-67.0789	-66.1767	-67.338		0.007408	0.007331	0.007408	0.006656																																					-58.1706	-62.027
			-66.1771	-67.0831	-66.1771	-67.3432		0.00741	0.007332	0.00741	0.006656																																					-58.195	-62.0475
			-66.1775	-67.0874	-66.1775	-67.3484		0.007412	0.007334	0.007412	0.006656																																					-58.2194	-62.068
			-66.178	-67.0917	-66.178	-67.3536		0.007414	0.007335	0.007414	0.006656																																					-58.2436	-62.0883
			-66.1785	-67.096	-66.1785	-67.3588		0.007416	0.007337	0.007416	0.006656																																					-58.2677	-62.1086
			-66.1791	-67.1003	-66.1791	-67.3641		0.007418	0.007338	0.007418	0.006656																																					-58.2918	-62.1289
			-66.1797	-67.1046	-66.1797	-67.3693		0.00742	0.00734	0.00742	0.006656																																					-58.3157	-62.1491
			-66.1803	-67.1089	-66.1803	-67.3746		0.007421	0.007341	0.007421	0.006656																																					-58.3396	-62.1692
			-66.181	-67.1132	-66.181	-67.3798		0.007423	0.007343	0.007423	0.006656																																					-58.3635	-62.1893
			-66.1817	-67.1175	-66.1817	-67.3851		0.007425	0.007344	0.007425	0.006656																																					-58.3873	-62.2093
			-66.1825	-67.1218	-66.1825	-67.3904		0.007427	0.007346	0.007427	0.006656																																					-58.411	-62.2292
			-66.1833	-67.1261	-66.1833	-67.3957		0.007429	0.007347	0.007429	0.006656																																					-58.4347	-62.2491
			-66.1842	-67.1304	-66.1842	-67.401		0.00743	0.007349	0.00743	0.006656																																					-58.4583	-62.269
			-66.1851	-67.1347	-66.1851	-67.4063		0.007432	0.00735	0.007432	0.006656																																					-58.4819	-62.2887
			-66.1861	-67.1391	-66.1861	-67.4116		0.007434	0.007352	0.007434	0.006656																																					-58.5055	-62.3084
			-66.1871	-67.1434	-66.1871	-67.4169		0.007436	0.007353	0.007436	0.006656																																					-58.529	-62.3281
			-66.1882	-67.1477	-66.1882	-67.4223		0.007438	0.007355	0.007438	0.006656																																					-58.5526	-62.3477
			-66.1893	-67.152	-66.1893	-67.4276		0.007439	0.007356	0.007439	0.006656																																					-58.5276	-62.3157
			-66.1904	-67.1563	-66.1904	-67.4329		0.007441	0.007358	0.007441	0.006656																																					-58.4614	-62.2399
			-66.1914	-67.1604	-66.1914	-67.438		0.007443	0.007359	0.007443	0.006656																																					-58.3593	-62.126
			-66.1922	-67.1643	-66.1922	-67.4429		0.007445	0.007361	0.007445	0.006656																																					-58.2263	-61.9792
			-66.1926	-67.1677	-66.1926	-67.4473		0.007447	0.007363	0.007447	0.006656																																					-58.0672	-61.8045
			-66.1925	-67.1705	-66.1925	-67.4511		0.00745	0.007365	0.00745	0.006656																																					-57.8862	-61.6065
			-66.1916	-67.1725	-66.1916	-67.4541		0.007452	0.007366	0.007452	0.006656																																					-57.6871	-61.3893
			-66.1898	-67.1734	-66.1898	-67.4561		0.007454	0.007368	0.007454	0.006656																																					-57.4735	-61.1563
			-66.1869	-67.1732	-66.1869	-67.4568		0.007457	0.00737	0.007457	0.006656																																					-57.2482	-60.911
			-66.1828	-67.1716	-66.1828	-67.4563		0.007459	0.007373	0.007459	0.006656																																					-57.014	-60.6559
			-66.1774	-67.1686	-66.1774	-67.4542		0.007462	0.007375	0.007462	0.006656																																					-56.7731	-60.3937
			-66.1705	-67.164	-66.1705	-67.4507		0.007465	0.007377	0.007465	0.006656																																					-56.5275	-60.1264
			-66.162	-67.1578	-66.162	-67.4454		0.007467	0.007379	0.007467	0.006656																																					-56.2789	-59.8558
			-66.1521	-67.1498	-66.1521	-67.4386		0.00747	0.007382	0.00747	0.006656																																					-56.0288	-59.5836
			-66.1406	-67.1402	-66.1406	-67.43		0.007473	0.007384	0.007473	0.006656																																					-55.7785	-59.3111
			-66.1275	-67.1289	-66.1275	-67.4196		0.007476	0.007387	0.007476	0.006656																																					-55.5289	-59.0394
			-66.1128	-67.1159	-66.1128	-67.4076		0.00748	0.007389	0.00748	0.006656																																					-55.2811	-58.7696
			-66.0966	-67.1012	-66.0966	-67.3939		0.007483	0.007392	0.007483	0.006656																																					-55.0356	-58.5025
			-66.0789	-67.0849	-66.0789	-67.3786		0.007486	0.007395	0.007486	0.006656																																					-54.7932	-58.2388
			-66.0597	-67.0669	-66.0597	-67.3617		0.007489	0.007398	0.007489	0.006656																																					-54.5543	-57.9791
			-66.0391	-67.0475	-66.0391	-67.3433		0.007493	0.007401	0.007493	0.006656																																					-54.3192	-57.7239
			-66.0172	-67.0266	-66.0172	-67.3234		0.007496	0.007404	0.007496	0.006656																																					-54.0884	-57.4735
			-65.994	-67.0043	-65.994	-67.3022		0.0075	0.007407	0.0075	0.006656																																					-53.862	-57.2283
			-65.9697	-66.9806	-65.9697	-67.2796		0.007504	0.00741	0.007504	0.006656																																					-53.6402	-56.9886
			-65.9442	-66.9557	-65.9442	-67.2558		0.007508	0.007413	0.007508	0.006656																																					-53.4231	-56.7545
			-65.9176	-66.9297	-65.9176	-67.2308		0.007511	0.007416	0.007511	0.006656																																					-53.2107	-56.5262
			-65.8901	-66.9025	-65.8901	-67.2047		0.007515	0.00742	0.007515	0.006656																																					-53.003	-56.3037
			-65.8616	-66.8743	-65.8616	-67.1776		0.007519	0.007423	0.007519	0.006656																																					-52.8001	-56.0871
			-65.8323	-66.8452	-65.8323	-67.1496		0.007523	0.007426	0.007523	0.006656																																					-52.6018	-55.8765
			-65.8022	-66.8152	-65.8022	-67.1207		0.007528	0.00743	0.007528	0.006656																																					-52.408	-55.6719
			-65.7714	-66.7844	-65.7714	-67.0911		0.007532	0.007433	0.007532	0.006656																																					-52.2187	-55.4732
			-65.74	-66.7528	-65.74	-67.0607		0.007536	0.007437	0.007536	0.006656																																					-52.0336	-55.2804
			-65.7079	-66.7206	-65.7079	-67.0296		0.00754	0.007441	0.00754	0.006656																																					-51.8527	-55.0934
			-65.6754	-66.6878	-65.6754	-66.998		0.007545	0.007445	0.007545	0.006656																																					-51.6758	-54.9121
			-65.6424	-66.6544	-65.6424	-66.9658		0.007549	0.007448	0.007549	0.006656																																					-51.5027	-54.7365
			-65.6089	-66.6206	-65.6089	-66.9332		0.007554	0.007452	0.007554	0.006656																																					-51.3331	-54.5665
			-65.5751	-66.5864	-65.5751	-66.9002		0.007558	0.007456	0.007558	0.006656																																					-51.1669	-54.4019
			-65.541	-66.5517	-65.541	-66.8668		0.007563	0.00746	0.007563	0.006656																																					-51.004	-54.2426
			-65.5066	-66.5168	-65.5066	-66.8331		0.007568	0.007464	0.007568	0.006656																																					-50.844	-54.0886
			-65.472	-66.4816	-65.472	-66.7992		0.007573	0.007468	0.007573	0.006656																																					-50.6867	-53.9397
			-65.4372	-66.4462	-65.4372	-66.7651		0.007577	0.007472	0.007577	0.006656																																					-50.532	-53.7957
			-65.4022	-66.4106	-65.4022	-66.7308		0.007582	0.007476	0.007582	0.006656																																					-50.3795	-53.6566
			-65.3671	-66.3748	-65.3671	-66.6964		0.007587	0.007481	0.007587	0.006656																																					-50.2291	-53.5222
			-65.3319	-66.339	-65.3319	-66.6619		0.007592	0.007485	0.007592	0.006656																																					-50.0804	-53.3924
			-65.2967	-66.3031	-65.2967	-66.6273		0.007597	0.007489	0.007597	0.006656																																					-49.9333	-53.2671
			-65.2615	-66.2672	-65.2615	-66.5928		0.007602	0.007493	0.007602	0.006656																																					-49.7874	-53.1461
			-65.2262	-66.2313	-65.2262	-66.5582		0.007608	0.007498	0.007608	0.006656																																					-49.6425	-53.0294
			-65.191	-66.1954	-65.191	-66.5238		0.007613	0.007502	0.007613	0.006656																																					-49.4984	-52.9167
			-65.1557	-66.1596	-65.1557	-66.4894		0.007618	0.007507	0.007618	0.006656																																					-49.3546	-52.8079
			-65.1206	-66.1239	-65.1206	-66.4551		0.007623	0.007511	0.007623	0.006656																																					-49.2109	-52.7031
			-65.0855	-66.0883	-65.0855	-66.4209		0.007629	0.007516	0.007629	0.006656																																					-49.0671	-52.6019
			-65.0505	-66.0529	-65.0505	-66.3869		0.007634	0.00752	0.007634	0.006656																																					-48.9227	-52.5043
			-65.0156	-66.0176	-65.0156	-66.353		0.00764	0.007525	0.00764	0.006656																																					-48.7774	-52.4102
			-64.9809	-65.9825	-64.9809	-66.3194		0.007645	0.007529	0.007645	0.006656																																					-48.6309	-52.3195
			-64.9462	-65.9476	-64.9462	-66.2859		0.007651	0.007534	0.007651	0.006656																																					-48.4828	-52.2321
			-64.9117	-65.913	-64.9117	-66.2527		0.007657	0.007539	0.007657	0.006656																																					-48.3327	-52.1478
			-64.8773	-65.8785	-64.8773	-66.2198		0.007662	0.007543	0.007662	0.006656																																					-48.1802	-52.0666
			-64.843	-65.8444	-64.843	-66.187		0.007668	0.007548	0.007668	0.006656																																					-48.0248	-51.9884
			-64.8089	-65.8105	-64.8089	-66.1546		0.007674	0.007553	0.007674	0.006656																																					-47.8661	-51.913
			-64.775	-65.7768	-64.775	-66.1224		0.00768	0.007558	0.00768	0.006656																																					-47.7036	-51.8404
			-64.7412	-65.7435	-64.7412	-66.0906		0.007686	0.007562	0.007686	0.006656																																					-47.537	-51.7704
			-64.7075	-65.7104	-64.7075	-66.059		0.007692	0.007567	0.007692	0.006656																																					-47.3657	-51.703
			-64.674	-65.6777	-64.674	-66.0277		0.007698	0.007572	0.007698	0.006656																																					-47.1893	-51.6381
			-64.6407	-65.6453	-64.6407	-65.9968		0.007704	0.007577	0.007704	0.006656																																					-47.0072	-51.5757
			-64.6074	-65.6132	-64.6074	-65.9661		0.00771	0.007582	0.00771	0.006656																																					-46.8191	-51.5156
			-64.5744	-65.5815	-64.5744	-65.9358		0.007717	0.007587	0.007717	0.006656																																					-46.6245	-51.4577
			-64.5414	-65.55	-64.5414	-65.9059		0.007723	0.007592	0.007723	0.006656																																					-46.4229	-51.402
			-64.5086	-65.519	-64.5086	-65.8763		0.007729	0.007597	0.007729	0.006656																																					-46.214	-51.3484
			-64.4758	-65.4883	-64.4758	-65.847		0.007736	0.007602	0.007736	0.006656																																					-45.9973	-51.2969
			-64.4432	-65.4579	-64.4432	-65.8181		0.007743	0.007607	0.007743	0.006656																																					-45.7725	-51.2473
			-64.4106	-65.4279	-64.4106	-65.7895		0.007749	0.007612	0.007749	0.006656																																					-45.5393	-51.1997
			-64.3782	-65.3982	-64.3782	-65.7613		0.007756	0.007617	0.007756	0.006656																																					-45.2972	-51.1538
			-64.3458	-65.3689	-64.3458	-65.7334		0.007763	0.007622	0.007763	0.006656																																					-45.046	-51.1098
			-64.3134	-65.34	-64.3134	-65.7059		0.00777	0.007627	0.00777	0.006656																																					-44.7854	-51.0675
			-64.281	-65.3115	-64.281	-65.6787		0.007777	0.007632	0.007777	0.006656																																					-44.5151	-51.0268
			-64.2487	-65.2833	-64.2487	-65.6519		0.007784	0.007637	0.007784	0.006656																																					-44.2347	-50.9878
			-64.2163	-65.2555	-64.2163	-65.6255		0.007792	0.007643	0.007792	0.006656																																					-43.944	-50.9503
			-64.1839	-65.228	-64.1839	-65.5994		0.007799	0.007648	0.007799	0.006656																																					-43.6427	-50.9144
			-64.1514	-65.2009	-64.1514	-65.5736		0.007807	0.007653	0.007807	0.006656																																					-43.3305	-50.8799
			-64.1188	-65.1742	-64.1188	-65.5483		0.007814	0.007658	0.007814	0.006656																																					-43.0071	-50.8468
			-64.0861	-65.1479	-64.0861	-65.5232		0.007822	0.007663	0.007822	0.006656																																					-42.6722	-50.8151
			-64.0533	-65.1219	-64.0533	-65.4986		0.00783	0.007668	0.00783	0.006656																																					-42.3255	-50.7848
			-64.0202	-65.0963	-64.0202	-65.4742		0.007838	0.007674	0.007838	0.006656																																					-41.9667	-50.7557
			-63.9869	-65.071	-63.9869	-65.4503		0.007846	0.007679	0.007846	0.006656																																					-41.5952	-50.7278
			-63.9533	-65.0462	-63.9533	-65.4266		0.007855	0.007684	0.007855	0.006656																																					-41.2108	-50.7012
			-63.9195	-65.0216	-63.9195	-65.4033		0.007863	0.007689	0.007863	0.006656																																					-40.8128	-50.6758
			-63.8852	-64.9975	-63.8852	-65.3804		0.007872	0.007695	0.007872	0.006656																																					-40.4006	-50.6515
			-63.8506	-64.9737	-63.8506	-65.3578		0.007881	0.0077	0.007881	0.006656																																					-39.9733	-50.6283
			-63.8154	-64.9502	-63.8154	-65.3355		0.00789	0.007705	0.00789	0.006656																																					-39.53	-50.6062
			-63.7798	-64.9271	-63.7798	-65.3136		0.0079	0.00771	0.0079	0.006656																																					-39.0695	-50.5851
			-63.7435	-64.9044	-63.7435	-65.292		0.007909	0.007716	0.007909	0.006656																																					-38.5904	-50.565
			-63.7066	-64.882	-63.7066	-65.2707		0.007919	0.007721	0.007919	0.006656																																					-38.0913	-50.546
			-63.669	-64.8599	-63.669	-65.2497		0.007929	0.007726	0.007929	0.006656																																					-37.5703	-50.5278
			-63.6305	-64.8382	-63.6305	-65.2291		0.00794	0.007732	0.00794	0.006656																																					-37.0256	-50.5107
			-63.5912	-64.8168	-63.5912	-65.2087		0.00795	0.007737	0.00795	0.006656																																					-36.4552	-50.4944
			-63.5508	-64.7958	-63.5508	-65.1887		0.007961	0.007742	0.007961	0.006656																																					-35.8571	-50.479
			-63.5094	-64.7751	-63.5094	-65.169		0.007972	0.007748	0.007972	0.006656																																					-35.2293	-50.4644
			-63.4668	-64.7547	-63.4668	-65.1496		0.007984	0.007753	0.007984	0.006656																																					-34.5699	-50.4507
			-63.4229	-64.7346	-63.4229	-65.1305		0.007996	0.007758	0.007996	0.006656																																					-33.8773	-50.4378
			-63.3776	-64.7149	-63.3776	-65.1117		0.008008	0.007764	0.008008	0.006656																																					-33.1505	-50.4257
			-63.3307	-64.6955	-63.3307	-65.0931		0.008021	0.007769	0.008021	0.006656																																					-32.389	-50.4143
			-63.2823	-64.6763	-63.2823	-65.0749		0.008034	0.007775	0.008034	0.006656																																					-31.5934	-50.4037
			-63.2321	-64.6576	-63.2321	-65.0569		0.008048	0.00778	0.008048	0.006656																																					-30.7653	-50.3939
			-63.1801	-64.6391	-63.1801	-65.0392		0.008062	0.007785	0.008062	0.006656																																					-29.9077	-50.3847
			-63.126	-64.6209	-63.126	-65.0218		0.008077	0.007791	0.008077	0.006656																																					-29.0257	-50.3763
			-63.0699	-64.603	-63.0699	-65.0047		0.008092	0.007796	0.008092	0.006656																																					-28.1257	-50.3685
			-63.0115	-64.5854	-63.0115	-64.9878		0.008109	0.007801	0.008109	0.006656																																					-27.2165	-50.3615
			-62.9509	-64.5681	-62.9509	-64.9712		0.008125	0.007807	0.008125	0.006656																																					-26.3085	-50.355
			-62.8877	-64.5511	-62.8877	-64.9548		0.008143	0.007812	0.008143	0.006656																																					-25.4138	-50.3492
			-62.822	-64.5344	-62.822	-64.9387		0.008161	0.007818	0.008161	0.006656																																					-24.5457	-50.344
			-62.7536	-64.5179	-62.7536	-64.9228		0.00818	0.007823	0.00818	0.006656																																					-23.7182	-50.3395
			-62.6825	-64.5018	-62.6825	-64.9072		0.0082	0.007828	0.0082	0.006656																																					-22.9449	-50.3355
			-62.6085	-64.4859	-62.6085	-64.8918		0.00822	0.007834	0.00822	0.006656																																					-22.239	-50.3321
			-62.5316	-64.4703	-62.5316	-64.8766		0.008241	0.007839	0.008241	0.006656																																					-21.6117	-50.3293
			-62.4516	-64.4549	-62.4516	-64.8617		0.008262	0.007845	0.008262	0.006656																																					-21.0725	-50.3271
			-62.3685	-64.4399	-62.3685	-64.8469		0.008284	0.00785	0.008284	0.006656																																					-20.6282	-50.3254
			-62.2822	-64.425	-62.2822	-64.8324		0.008307	0.007856	0.008307	0.006656																																					-20.2833	-50.3243
			-62.1927	-64.4105	-62.1927	-64.8181		0.00833	0.007861	0.00833	0.006656																																					-20.0394	-50.3237
			-62.0998	-64.3962	-62.0998	-64.804		0.008353	0.007866	0.008353	0.006656																																					-19.8959	-50.3236
			-62.0036	-64.3821	-62.0036	-64.7901		0.008376	0.007872	0.008376	0.006656																																					-19.8499	-50.324
			-61.9039	-64.3683	-61.9039	-64.7764		0.0084	0.007877	0.0084	0.006656																																					-19.897	-50.325
			-61.8006	-64.3547	-61.8006	-64.7629		0.008424	0.007883	0.008424	0.006656																																					-20.0313	-50.3264
			-61.6938	-64.3414	-61.6938	-64.7496		0.008447	0.007888	0.008447	0.006656																																					-20.2461	-50.3284
			-61.5832	-64.3283	-61.5832	-64.7365		0.008471	0.007893	0.008471	0.006656																																					-20.5338	-50.3308
			-61.4687	-64.3155	-61.4687	-64.7235		0.008495	0.007899	0.008495	0.006656																																					-20.8868	-50.3337
			-61.3503	-64.3028	-61.3503	-64.7107		0.008519	0.007904	0.008519	0.006656																																					-21.2973	-50.3371
			-61.2278	-64.2904	-61.2278	-64.698		0.008543	0.00791	0.008543	0.006656																																					-21.7576	-50.3409
			-61.101	-64.2783	-61.101	-64.6855		0.008567	0.007915	0.008567	0.006656																																					-22.2604	-50.3452
			-60.9696	-64.2663	-60.9696	-64.6732		0.008591	0.00792	0.008591	0.006656																																					-22.7986	-50.35
			-60.8335	-64.2546	-60.8335	-64.661		0.008614	0.007926	0.008614	0.006656																																					-23.3657	-50.3552
			-60.6923	-64.2431	-60.6923	-64.6489		0.008638	0.007931	0.008638	0.006656																																					-23.9556	-50.3608
			-60.5458	-64.2318	-60.5458	-64.6369		0.008662	0.007937	0.008662	0.006656																																					-24.5625	-50.3669
			-60.3935	-64.2207	-60.3935	-64.6251		0.008686	0.007942	0.008686	0.006656																																					-25.1813	-50.3734
			-60.2349	-64.2098	-60.2349	-64.6134		0.00871	0.007947	0.00871	0.006656																																					-25.8071	-50.3804
			-60.0697	-64.1991	-60.0697	-64.6018		0.008733	0.007953	0.008733	0.006656																																					-26.4356	-50.3877
			-59.8972	-64.1886	-59.8972	-64.5903		0.008758	0.007958	0.008758	0.006656																																					-27.0629	-50.3955
			-59.7169	-64.1783	-59.7169	-64.5789		0.008782	0.007964	0.008782	0.006656																																					-27.6851	-50.4038
			-59.5281	-64.1683	-59.5281	-64.5675		0.008806	0.007969	0.008806	0.006656																																					-28.2991	-50.4124
			-59.3301	-64.1584	-59.3301	-64.5563		0.008831	0.007974	0.008831	0.006656																																					-28.9017	-50.4214
			-59.122	-64.1487	-59.122	-64.5451		0.008856	0.00798	0.008856	0.006656																																					-29.4904	-50.4309
			-58.9031	-64.1391	-58.9031	-64.5339		0.008881	0.007985	0.008881	0.006656																																					-30.0626	-50.4407
			-58.6723	-64.1298	-58.6723	-64.5228		0.008906	0.007991	0.008906	0.006656																																					-30.6164	-50.451
			-58.4289	-64.1207	-58.4289	-64.5117		0.008932	0.007996	0.008932	0.006656																																					-31.15	-50.4616
			-58.1717	-64.1117	-58.1717	-64.5007		0.008959	0.008001	0.008959	0.006656																																					-31.6619	-50.4726
			-57.8999	-64.1029	-57.8999	-64.4896		0.008986	0.008007	0.008986	0.006656																																					-32.1512	-50.4841
			-57.6124	-64.0943	-57.6124	-64.4786		0.009013	0.008012	0.009013	0.006656																																					-32.6172	-50.4959
			-57.3083	-64.0859	-57.3083	-64.4675		0.009041	0.008017	0.009041	0.006656																																					-33.0596	-50.5081
			-56.9868	-64.0776	-56.9868	-64.4564		0.00907	0.008023	0.00907	0.006656																																					-33.4785	-50.5207
			-56.6469	-64.0695	-56.6469	-64.4453		0.009099	0.008028	0.009099	0.006656																																					-33.8744	-50.5336
			-56.2881	-64.0616	-56.2881	-64.4341		0.009128	0.008033	0.009128	0.006656																																					-34.2481	-50.547
			-55.9098	-64.0538	-55.9098	-64.4228		0.009159	0.008039	0.009159	0.006656																																					-34.6005	-50.5607
			-55.5118	-64.0462	-55.5118	-64.4115		0.00919	0.008044	0.00919	0.006656																																					-34.9331	-50.5748
			-55.0938	-64.0388	-55.0938	-64.4		0.009221	0.008049	0.009221	0.006656																																					-35.2471	-50.5892
			-54.656	-64.0315	-54.656	-64.3884		0.009253	0.008055	0.009253	0.006656																																					-35.5441	-50.6041
			-54.1989	-64.0243	-54.1989	-64.3766		0.009286	0.00806	0.009286	0.006656																																					-35.8257	-50.6193
			-53.7231	-64.0174	-53.7231	-64.3647		0.009319	0.008065	0.009319	0.006656																																					-36.0934	-50.6348
			-53.2298	-64.0105	-53.2298	-64.3525		0.009352	0.008071	0.009352	0.006656																																					-36.3487	-50.6507
			-52.7205	-64.0039	-52.7205	-64.3402		0.009386	0.008076	0.009386	0.006656																																					-36.593	-50.667
			-52.1972	-63.9974	-52.1972	-64.3276		0.00942	0.008081	0.00942	0.006656																																					-36.8277	-50.6837
			-51.6623	-63.991	-51.6623	-64.3147		0.009454	0.008087	0.009454	0.006656																																					-37.0538	-50.7006
			-51.1186	-63.9848	-51.1186	-64.3015		0.009488	0.008092	0.009488	0.006656																																					-37.2725	-50.718
			-50.5693	-63.9787	-50.5693	-64.288		0.009522	0.008097	0.009522	0.006656																																					-37.4847	-50.7357
			-50.0179	-63.9727	-50.0179	-64.2741		0.009556	0.008102	0.009556	0.006656																																					-37.6911	-50.7537
			-49.4682	-63.9669	-49.4682	-64.2598		0.00959	0.008108	0.00959	0.006656																																					-37.8925	-50.7721
			-48.9237	-63.9613	-48.9237	-64.2451		0.009623	0.008113	0.009623	0.006656																																					-38.0894	-50.7908
			-48.3882	-63.9557	-48.3882	-64.2299		0.009656	0.008118	0.009656	0.006656																																					-38.2822	-50.8099
			-47.8651	-63.9503	-47.8651	-64.2142		0.009688	0.008124	0.009688	0.006656																																					-38.4714	-50.8293
			-47.3573	-63.9451	-47.3573	-64.198		0.00972	0.008129	0.00972	0.006656																																					-38.6573	-50.849
			-46.8676	-63.9399	-46.8676	-64.1811		0.009752	0.008134	0.009752	0.006656																																					-38.84	-50.8691
			-46.3982	-63.9349	-46.3982	-64.1637		0.009783	0.008139	0.009783	0.006656																																					-39.0197	-50.8894
			-45.9509	-63.9301	-45.9509	-64.1456		0.009813	0.008144	0.009813	0.006656																																					-39.1966	-50.9102
			-45.5271	-63.9253	-45.5271	-64.1267		0.009843	0.00815	0.009843	0.006656																																					-39.3707	-50.9312
			-45.1278	-63.9207	-45.1278	-64.1071		0.009872	0.008155	0.009872	0.006656																																					-39.5419	-50.9525
			-44.7541	-63.9162	-44.7541	-64.0867		0.009901	0.00816	0.009901	0.006656																																					-39.7104	-50.9742
			-44.4066	-63.9119	-44.4066	-64.0654		0.00993	0.008165	0.00993	0.006656																																					-39.8759	-50.9962
			-44.0859	-63.9076	-44.0859	-64.0432		0.009957	0.00817	0.009957	0.006656																																					-40.0385	-51.0185
			-43.7926	-63.9035	-43.7926	-64.0199		0.009985	0.008176	0.009985	0.006656																																					-40.1981	-51.0411
			-43.5271	-63.8995	-43.5271	-63.9957		0.010011	0.008181	0.010011	0.006656																																					-40.3546	-51.064
			-43.29	-63.8957	-43.29	-63.9703		0.010038	0.008186	0.010038	0.006656																																					-40.5077	-51.0872
			-43.0817	-63.8919	-43.0817	-63.9437		0.010063	0.008191	0.010063	0.006656																																					-40.6575	-51.1107
			-42.9025	-63.8882	-42.9025	-63.916		0.010089	0.008196	0.010089	0.006656																																					-40.8039	-51.1345
			-42.7529	-63.8847	-42.7529	-63.8869		0.010114	0.008201	0.010114	0.006656																																					-40.9466	-51.1586
			-42.6331	-63.8813	-42.6331	-63.8564		0.010138	0.008207	0.010138	0.006656																																					-41.0857	-51.183
			-42.5431	-63.878	-42.5431	-63.8246		0.010162	0.008212	0.010162	0.006656																																					-41.221	-51.2077
			-42.4828	-63.8748	-42.4828	-63.7912		0.010186	0.008217	0.010186	0.006656																																					-41.3524	-51.2326
			-42.4519	-63.8717	-42.4519	-63.7563		0.010209	0.008222	0.010209	0.006656																																					-41.48	-51.2578
			-42.4498	-63.8688	-42.4498	-63.7198		0.010232	0.008227	0.010232	0.006656																																					-41.6037	-51.2833
			-42.4757	-63.8659	-42.4757	-63.6816		0.010254	0.008232	0.010254	0.006656																																					-41.7234	-51.3091
			-42.5286	-63.8632	-42.5286	-63.6417		0.010276	0.008237	0.010276	0.006656																																					-41.8393	-51.3351
			-42.6072	-63.8605	-42.6072	-63.6001		0.010298	0.008242	0.010298	0.006657																																					-41.9513	-51.3614
			-42.71	-63.858	-42.71	-63.5567		0.01032	0.008247	0.01032	0.006657																																					-42.0595	-51.3879
			-42.8351	-63.8556	-42.8351	-63.5114		0.010341	0.008252	0.010341	0.006657																																					-42.1639	-51.4147
			-42.9808	-63.8532	-42.9808	-63.4642		0.010361	0.008257	0.010361	0.006657																																					-42.2648	-51.4418
			-43.1451	-63.851	-43.1451	-63.4151		0.010382	0.008262	0.010382	0.006657																																					-42.362	-51.4691
			-43.3259	-63.8489	-43.3259	-63.364		0.010402	0.008267	0.010402	0.006658																																					-42.4559	-51.4966
			-43.5211	-63.8469	-43.5211	-63.311		0.010422	0.008272	0.010422	0.006658																																					-42.5465	-51.5244
			-43.7286	-63.8449	-43.7286	-63.256		0.010442	0.008277	0.010442	0.006659																																					-42.634	-51.5524
			-43.9463	-63.8431	-43.9463	-63.199		0.010461	0.008282	0.010461	0.00666																																					-42.7185	-51.5807
			-44.1724	-63.8414	-44.1724	-63.14		0.01048	0.008287	0.01048	0.006661																																					-42.8001	-51.6092
			-44.4051	-63.8398	-44.4051	-63.0789		0.010499	0.008292	0.010499	0.006662																																					-42.8792	-51.6379
			-44.6424	-63.8383	-44.6424	-63.0159		0.010517	0.008297	0.010517	0.006663																																					-42.9557	-51.6668
			-44.8831	-63.8368	-44.8831	-62.9509		0.010536	0.008302	0.010536	0.006664																																					-43.03	-51.6959
			-45.1255	-63.8355	-45.1255	-62.8838		0.010554	0.008307	0.010554	0.006666																																					-43.1021	-51.7252
			-45.3685	-63.8343	-45.3685	-62.8148		0.010571	0.008312	0.010571	0.006668																																					-43.1722	-51.7548
			-45.611	-63.8331	-45.611	-62.7439		0.010589	0.008317	0.010589	0.00667																																					-43.2405	-51.7845
			-45.852	-63.8321	-45.852	-62.671		0.010606	0.008322	0.010606	0.006672																																					-43.3071	-51.8145
			-46.0907	-63.8311	-46.0907	-62.5962		0.010623	0.008327	0.010623	0.006675																																					-43.3722	-51.8446
			-46.3265	-63.8303	-46.3265	-62.5196		0.01064	0.008332	0.01064	0.006678																																					-43.4359	-51.8749
			-46.5587	-63.8295	-46.5587	-62.4411		0.010657	0.008337	0.010657	0.006681																																					-43.4984	-51.9054
			-46.7871	-63.8288	-46.7871	-62.3608		0.010673	0.008342	0.010673	0.006685																																					-43.5598	-51.9361
			-47.0111	-63.8282	-47.0111	-62.2788		0.01069	0.008347	0.01069	0.006689																																					-43.6203	-51.967
			-47.2305	-63.8277	-47.2305	-62.195		0.010706	0.008352	0.010706	0.006693																																					-43.6799	-51.9981
			-47.4451	-63.8273	-47.4451	-62.1095		0.010722	0.008356	0.010722	0.006698																																					-43.7389	-52.0293
			-47.6547	-63.827	-47.6547	-62.0224		0.010737	0.008361	0.010737	0.006703																																					-43.7972	-52.0606
			-47.8593	-63.8267	-47.8593	-61.9336		0.010753	0.008366	0.010753	0.006708																																					-43.855	-52.0922
			-48.0588	-63.8266	-48.0588	-61.8431		0.010768	0.008371	0.010768	0.006714																																					-43.9124	-52.1239
			-48.2531	-63.8265	-48.2531	-61.7511		0.010783	0.008376	0.010783	0.006721																																					-43.9695	-52.1557
			-48.4423	-63.8265	-48.4423	-61.6574		0.010798	0.008381	0.010798	0.006728																																					-44.0263	-52.1877
			-48.6264	-63.8266	-48.6264	-61.5621		0.010813	0.008385	0.010813	0.006735																																					-44.0829	-52.2198
			-48.8055	-63.8268	-48.8055	-61.4651		0.010827	0.00839	0.010827	0.006743																																					-44.1394	-52.2521
			-48.9797	-63.8271	-48.9797	-61.3665		0.010842	0.008395	0.010842	0.006752																																					-44.1959	-52.2845
			-49.149	-63.8274	-49.149	-61.2662		0.010856	0.0084	0.010856	0.006761																																					-44.2523	-52.3171
			-49.3135	-63.8279	-49.3135	-61.1642		0.01087	0.008405	0.01087	0.006771																																					-44.3088	-52.3497
			-49.4735	-63.8284	-49.4735	-61.0604		0.010884	0.008409	0.010884	0.006781																																					-44.3653	-52.3825
			-49.6289	-63.829	-49.6289	-60.9549		0.010897	0.008414	0.010897	0.006792																																					-44.4219	-52.4155
			-49.78	-63.8297	-49.78	-60.8474		0.010911	0.008419	0.010911	0.006804																																					-44.4787	-52.4485
			-49.9269	-63.8304	-49.9269	-60.7379		0.010924	0.008424	0.010924	0.006816																																					-44.5356	-52.4817
			-50.0698	-63.8312	-50.0698	-60.6264		0.010938	0.008428	0.010938	0.006829																																					-44.5926	-52.5149
			-50.2088	-63.8322	-50.2088	-60.5127		0.010951	0.008433	0.010951	0.006843																																					-44.6499	-52.5483
			-50.344	-63.8331	-50.344	-60.3968		0.010964	0.008438	0.010964	0.006857																																					-44.7073	-52.5817
			-50.4757	-63.8342	-50.4757	-60.2785		0.010976	0.008442	0.010976	0.006873																																					-44.7649	-52.6153
			-50.6039	-63.8354	-50.6039	-60.1576		0.010989	0.008447	0.010989	0.006889																																					-44.8227	-52.649
			-50.729	-63.8366	-50.729	-60.0342		0.011002	0.008452	0.011002	0.006905																																					-44.8808	-52.6827
			-50.851	-63.8379	-50.851	-59.9079		0.011014	0.008456	0.011014	0.006923																																					-44.939	-52.7166
			-50.9701	-63.8392	-50.9701	-59.7786		0.011026	0.008461	0.011026	0.006941																																					-44.9974	-52.7505
			-51.0865	-63.8407	-51.0865	-59.6461		0.011038	0.008466	0.011038	0.00696																																					-45.0561	-52.7845
			-51.2004	-63.8422	-51.2004	-59.5103		0.01105	0.00847	0.01105	0.00698																																					-45.115	-52.8186
			-51.3119	-63.8438	-51.3119	-59.3709		0.011062	0.008475	0.011062	0.007																																					-45.174	-52.8527
			-51.4211	-63.8454	-51.4211	-59.2276		0.011074	0.00848	0.011074	0.007021																																					-45.2332	-52.8869
			-51.5283	-63.8472	-51.5283	-59.0803		0.011086	0.008484	0.011086	0.007043																																					-45.2927	-52.9212
			-51.6336	-63.849	-51.6336	-58.9285		0.011097	0.008489	0.011097	0.007065																																					-45.3523	-52.9556
			-51.7371	-63.8509	-51.7371	-58.772		0.011108	0.008493	0.011108	0.007088																																					-45.4121	-52.99
			-51.8389	-63.8528	-51.8389	-58.6104		0.01112	0.008498	0.01112	0.007112																																					-45.472	-53.0245
			-51.9392	-63.8548	-51.9392	-58.4433		0.011131	0.008502	0.011131	0.007135																																					-45.5321	-53.059
			-52.0381	-63.8569	-52.0381	-58.2702		0.011142	0.008507	0.011142	0.00716																																					-45.5924	-53.0936
			-52.1356	-63.859	-52.1356	-58.0907		0.011153	0.008512	0.011153	0.007184																																					-45.6528	-53.1282
			-52.232	-63.8613	-52.232	-57.9043		0.011163	0.008516	0.011163	0.007209																																					-45.7133	-53.1629
			-52.3272	-63.8635	-52.3272	-57.7104		0.011174	0.008521	0.011174	0.007233																																					-45.774	-53.1976
			-52.4213	-63.8659	-52.4213	-57.5084		0.011185	0.008525	0.011185	0.007258																																					-45.8348	-53.2324
			-52.5145	-63.8683	-52.5145	-57.2977		0.011195	0.00853	0.011195	0.007283																																					-45.8957	-53.2672
			-52.6067	-63.8708	-52.6067	-57.0776		0.011205	0.008534	0.011205	0.007308																																					-45.9567	-53.302
			-52.698	-63.8733	-52.698	-56.8474		0.011216	0.008539	0.011216	0.007332																																					-46.0178	-53.3369
			-52.7885	-63.8759	-52.7885	-56.6063		0.011226	0.008543	0.011226	0.007357																																					-46.079	-53.3717
			-52.8781	-63.8786	-52.8781	-56.3536		0.011236	0.008548	0.011236	0.007382																																					-46.1403	-53.4067
			-52.967	-63.8813	-52.967	-56.0887		0.011246	0.008552	0.011246	0.007406																																					-46.2017	-53.4416
			-53.0551	-63.8841	-53.0551	-55.8106		0.011256	0.008556	0.011256	0.007431																																					-46.2632	-53.4766
			-53.1424	-63.887	-53.1424	-55.5187		0.011265	0.008561	0.011265	0.007455																																					-46.3248	-53.5115
			-53.229	-63.8899	-53.229	-55.2123		0.011275	0.008565	0.011275	0.00748																																					-46.3864	-53.5465
			-53.3149	-63.8929	-53.3149	-54.8908		0.011285	0.00857	0.011285	0.007504																																					-46.4481	-53.5816
			-53.4	-63.8959	-53.4	-54.5536		0.011294	0.008574	0.011294	0.007528																																					-46.5099	-53.6166
			-53.4844	-63.899	-53.4844	-54.2002		0.011303	0.008579	0.011303	0.007552																																					-46.5718	-53.6516
			-53.568	-63.9022	-53.568	-53.8304		0.011313	0.008583	0.011313	0.007576																																					-46.6337	-53.6866
			-53.6509	-63.9054	-53.6509	-53.4442		0.011322	0.008587	0.011322	0.0076																																					-46.6957	-53.7217
			-53.733	-63.9087	-53.733	-53.0415		0.011331	0.008592	0.011331	0.007624																																					-46.7577	-53.7567
			-53.8144	-63.912	-53.8144	-52.6229		0.01134	0.008596	0.01134	0.007648																																					-46.8198	-53.7918
			-53.895	-63.9154	-53.895	-52.1889		0.011349	0.0086	0.011349	0.007672																																					-46.882	-53.8268
			-53.9748	-63.9189	-53.9748	-51.7408		0.011358	0.008605	0.011358	0.007696																																					-46.9442	-53.8619
			-54.0539	-63.9224	-54.0539	-51.2797		0.011367	0.008609	0.011367	0.007719																																					-47.0064	-53.8969
			-54.1321	-63.9259	-54.1321	-50.8075		0.011375	0.008613	0.011375	0.007743																																					-47.0687	-53.9319
			-54.2096	-63.9295	-54.2096	-50.3263		0.011384	0.008618	0.011384	0.007767																																					-47.131	-53.9669
			-54.2863	-63.9332	-54.2863	-49.8383		0.011393	0.008622	0.011393	0.00779																																					-47.1934	-54.0019
			-54.3622	-63.9369	-54.3622	-49.3463		0.011401	0.008626	0.011401	0.007813																																					-47.2558	-54.0369
			-54.4374	-63.9407	-54.4374	-48.853		0.01141	0.008631	0.01141	0.007837																																					-47.3182	-54.0719
			-54.5117	-63.9445	-54.5117	-48.3612		0.011418	0.008635	0.011418	0.00786																																					-47.3806	-54.1069
			-54.5853	-63.9484	-54.5853	-47.8739		0.011426	0.008639	0.011426	0.007883																																					-47.4431	-54.1418
			-54.6581	-63.9523	-54.6581	-47.3937		0.011434	0.008643	0.011434	0.007905																																					-47.5055	-54.1767
			-54.7301	-63.9563	-54.7301	-46.9232		0.011443	0.008648	0.011443	0.007928																																					-47.568	-54.2116
			-54.8014	-63.9603	-54.8014	-46.4645		0.011451	0.008652	0.011451	0.00795																																					-47.6305	-54.2465
			-54.8719	-63.9644	-54.8719	-46.0198		0.011459	0.008656	0.011459	0.007972																																					-47.693	-54.2813
			-54.9417	-63.9685	-54.9417	-45.5907		0.011467	0.00866	0.011467	0.007994																																					-47.7555	-54.3162
			-55.0108	-63.9727	-55.0108	-45.1786		0.011474	0.008665	0.011474	0.008015																																					-47.818	-54.3509
			-55.0791	-63.9769	-55.0791	-44.7847		0.011482	0.008669	0.011482	0.008036																																					-47.8805	-54.3857
			-55.1467	-63.9812	-55.1467	-44.41		0.01149	0.008673	0.01149	0.008057																																					-47.943	-54.4204
			-55.2137	-63.9855	-55.2137	-44.0554		0.011498	0.008677	0.011498	0.008077																																					-48.0055	-54.4551
			-55.2799	-63.9898	-55.2799	-43.7215		0.011505	0.008681	0.011505	0.008097																																					-48.0679	-54.4898
			-55.3455	-63.9943	-55.3455	-43.4091		0.011513	0.008686	0.011513	0.008116																																					-48.1304	-54.5244
			-55.4104	-63.9987	-55.4104	-43.1186		0.01152	0.00869	0.01152	0.008135																																					-48.1928	-54.559
			-55.4747	-64.0032	-55.4747	-42.8508		0.011528	0.008694	0.011528	0.008154																																					-48.2551	-54.5935
			-55.5383	-64.0077	-55.5383	-42.606		0.011535	0.008698	0.011535	0.008172																																					-48.3175	-54.628
			-55.6013	-64.0123	-55.6013	-42.3849		0.011542	0.008702	0.011542	0.00819																																					-48.3798	-54.6625
			-55.6637	-64.017	-55.6637	-42.1877		0.01155	0.008706	0.01155	0.008208																																					-48.442	-54.6969
			-55.7254	-64.0216	-55.7254	-42.015		0.011557	0.00871	0.011557	0.008225																																					-48.5042	-54.7313
			-55.7866	-64.0263	-55.7866	-41.867		0.011564	0.008714	0.011564	0.008242																																					-48.5663	-54.7657
			-55.8472	-64.0311	-55.8472	-41.7438		0.011571	0.008719	0.011571	0.008258																																					-48.6284	-54.7999
			-55.9072	-64.0359	-55.9072	-41.6455		0.011578	0.008723	0.011578	0.008274																																					-48.6904	-54.8342
			-55.9666	-64.0407	-55.9666	-41.572		0.011585	0.008727	0.011585	0.00829																																					-48.7523	-54.8684
			-56.0255	-64.0456	-56.0255	-41.5228		0.011592	0.008731	0.011592	0.008305																																					-48.8142	-54.9025
			-56.0838	-64.0505	-56.0838	-41.4977		0.011599	0.008735	0.011599	0.00832																																					-48.876	-54.9366
			-56.1415	-64.0555	-56.1415	-41.4958		0.011606	0.008739	0.011606	0.008335																																					-48.9377	-54.9707
			-56.1987	-64.0605	-56.1987	-41.5163		0.011613	0.008743	0.011613	0.008349																																					-48.9993	-55.0047
			-56.2554	-64.0655	-56.2554	-41.5583		0.011619	0.008747	0.011619	0.008363																																					-49.0608	-55.0386
			-56.3115	-64.0706	-56.3115	-41.6206		0.011626	0.008751	0.011626	0.008377																																					-49.1222	-55.0725
			-56.3671	-64.0757	-56.3671	-41.7018		0.011633	0.008755	0.011633	0.008391																																					-49.1835	-55.1063
			-56.4222	-64.0808	-56.4222	-41.8007		0.011639	0.008759	0.011639	0.008404																																					-49.2448	-55.1401
			-56.4768	-64.086	-56.4768	-41.9157		0.011646	0.008763	0.011646	0.008417																																					-49.3059	-55.1738
			-56.5309	-64.0912	-56.5309	-42.0452		0.011652	0.008767	0.011652	0.00843																																					-49.3669	-55.2075
			-56.5845	-64.0965	-56.5845	-42.1879		0.011659	0.008771	0.011659	0.008442																																					-49.4278	-55.2411
			-56.6376	-64.1018	-56.6376	-42.342		0.011665	0.008775	0.011665	0.008454																																					-49.4885	-55.2746
			-56.6903	-64.1071	-56.6903	-42.506		0.011672	0.008779	0.011672	0.008466																																					-49.5492	-55.3081
			-56.7424	-64.1124	-56.7424	-42.6785		0.011678	0.008783	0.011678	0.008478																																					-49.6097	-55.3415
			-56.7941	-64.1178	-56.7941	-42.858		0.011684	0.008787	0.011684	0.00849																																					-49.6701	-55.3749
			-56.8454	-64.1233	-56.8454	-43.0432		0.01169	0.008791	0.01169	0.008501																																					-49.7304	-55.4082
			-56.8962	-64.1287	-56.8962	-43.2326		0.011697	0.008795	0.011697	0.008512																																					-49.7905	-55.4415
			-56.9465	-64.1342	-56.9465	-43.4252		0.011703	0.008799	0.011703	0.008523																																					-49.8505	-55.4746
			-56.9964	-64.1397	-56.9964	-43.6199		0.011709	0.008803	0.011709	0.008533																																					-49.9104	-55.5077
			-57.0459	-64.1453	-57.0459	-43.8156		0.011715	0.008806	0.011715	0.008544																																					-49.9701	-55.5408
			-57.0949	-64.1509	-57.0949	-44.0114		0.011721	0.00881	0.011721	0.008554																																					-50.0297	-55.5738
			-57.1436	-64.1565	-57.1436	-44.2065		0.011727	0.008814	0.011727	0.008564																																					-50.0891	-55.6067
			-57.1918	-64.1621	-57.1918	-44.4002		0.011733	0.008818	0.011733	0.008574																																					-50.1484	-55.6395
			-57.2396	-64.1678	-57.2396	-44.592		0.011739	0.008822	0.011739	0.008583																																					-50.2076	-55.6723
			-57.287	-64.1735	-57.287	-44.7813		0.011745	0.008826	0.011745	0.008592																																					-50.2665	-55.705
			-57.334	-64.1792	-57.334	-44.9678		0.011751	0.00883	0.011751	0.008602																																					-50.3254	-55.7377
			-57.3807	-64.185	-57.3807	-45.1512		0.011756	0.008834	0.011756	0.008611																																					-50.384	-55.7703
			-57.4269	-64.1907	-57.4269	-45.3314		0.011762	0.008837	0.011762	0.008619																																					-50.4425	-55.8028
			-57.4728	-64.1966	-57.4728	-45.5082		0.011768	0.008841	0.011768	0.008628																																					-50.5009	-55.8352
			-57.5183	-64.2024	-57.5183	-45.6817		0.011774	0.008845	0.011774	0.008637																																					-50.5591	-55.8676
			-57.5634	-64.2083	-57.5634	-45.8519		0.011779	0.008849	0.011779	0.008645																																					-50.6171	-55.8999
			-57.6082	-64.2141	-57.6082	-46.0192		0.011785	0.008853	0.011785	0.008653																																					-50.6749	-55.9322
			-57.6526	-64.2201	-57.6526	-46.1835		0.011791	0.008856	0.011791	0.008661																																					-50.7326	-55.9643
			-57.6967	-64.226	-57.6967	-46.3454		0.011796	0.00886	0.011796	0.008669																																					-50.7901	-55.9964
			-57.7404	-64.232	-57.7404	-46.5051		0.011802	0.008864	0.011802	0.008676																																					-50.8475	-56.0284
			-57.7838	-64.238	-57.7838	-46.6629		0.011807	0.008868	0.011807	0.008684																																					-50.9046	-56.0604
			-57.8268	-64.244	-57.8268	-46.8192		0.011813	0.008872	0.011813	0.008691																																					-50.9616	-56.0923
			-57.8695	-64.25	-57.8695	-46.9743		0.011818	0.008875	0.011818	0.008699																																					-51.0185	-56.1241
			-57.9119	-64.2561	-57.9119	-47.1286		0.011824	0.008879	0.011824	0.008706																																					-51.0751	-56.1558
			-57.9539	-64.2622	-57.9539	-47.2823		0.011829	0.008883	0.011829	0.008713																																					-51.1316	-56.1875
			-57.9957	-64.2683	-57.9957	-47.4357		0.011834	0.008887	0.011834	0.008719																																					-51.1879	-56.219
			-58.0371	-64.2744	-58.0371	-47.5891		0.01184	0.00889	0.01184	0.008726																																					-51.244	-56.2506
			-58.0781	-64.2806	-58.0781	-47.7426		0.011845	0.008894	0.011845	0.008732																																					-51.2999	-56.282
			-58.1189	-64.2867	-58.1189	-47.8964		0.01185	0.008898	0.01185	0.008739																																					-51.3556	-56.3134
			-58.1594	-64.2929	-58.1594	-48.0505		0.011855	0.008902	0.011855	0.008745																																					-51.4112	-56.3446
			-58.1995	-64.2991	-58.1995	-48.205		0.011861	0.008905	0.011861	0.008751																																					-51.4666	-56.3759
			-58.2394	-64.3054	-58.2394	-48.3599		0.011866	0.008909	0.011866	0.008757																																					-51.5218	-56.407
			-58.2789	-64.3116	-58.2789	-48.5152		0.011871	0.008913	0.011871	0.008763																																					-51.5768	-56.4381
			-58.3182	-64.3179	-58.3182	-48.6708		0.011876	0.008916	0.011876	0.008769																																					-51.6316	-56.469
			-58.3571	-64.3242	-58.3571	-48.8267		0.011881	0.00892	0.011881	0.008774																																					-51.6863	-56.5
			-58.3958	-64.3305	-58.3958	-48.9827		0.011886	0.008924	0.011886	0.00878																																					-51.7407	-56.5308
			-58.4342	-64.3369	-58.4342	-49.1387		0.011891	0.008927	0.011891	0.008785																																					-51.795	-56.5615
			-58.4723	-64.3432	-58.4723	-49.2946		0.011896	0.008931	0.011896	0.008791																																					-51.849	-56.5922
			-58.5101	-64.3496	-58.5101	-49.4501		0.011901	0.008935	0.011901	0.008796																																					-51.9029	-56.6228
			-58.5477	-64.356	-58.5477	-49.6052		0.011906	0.008938	0.011906	0.008801																																					-51.9566	-56.6534
			-58.585	-64.3624	-58.585	-49.7597		0.011911	0.008942	0.011911	0.008806																																					-52.0101	-56.6838
			-58.622	-64.3688	-58.622	-49.9134		0.011916	0.008945	0.011916	0.008811																																					-52.0635	-56.7142
			-58.6587	-64.3752	-58.6587	-50.066		0.011921	0.008949	0.011921	0.008816																																					-52.1166	-56.7445
			-58.6952	-64.3817	-58.6952	-50.2175		0.011926	0.008953	0.011926	0.00882																																					-52.1695	-56.7747
			-58.7314	-64.3881	-58.7314	-50.3677		0.011931	0.008956	0.011931	0.008825																																					-52.2223	-56.8049
			-58.7674	-64.3946	-58.7674	-50.5164		0.011936	0.00896	0.011936	0.008829																																					-52.2748	-56.8349
			-58.8031	-64.4011	-58.8031	-50.6635		0.01194	0.008963	0.01194	0.008834																																					-52.3272	-56.8649
			-58.8386	-64.4076	-58.8386	-50.8089		0.011945	0.008967	0.011945	0.008838																																					-52.3794	-56.8948
			-58.8738	-64.4142	-58.8738	-50.9525		0.01195	0.008971	0.01195	0.008842																																					-52.4313	-56.9247
			-58.9088	-64.4207	-58.9088	-51.0941		0.011955	0.008974	0.011955	0.008847																																					-52.4831	-56.9544
			-58.9435	-64.4273	-58.9435	-51.2336		0.011959	0.008978	0.011959	0.008851																																					-52.5347	-56.9841
			-58.978	-64.4338	-58.978	-51.3711		0.011964	0.008981	0.011964	0.008855																																					-52.5861	-57.0137
			-59.0122	-64.4404	-59.0122	-51.5065		0.011969	0.008985	0.011969	0.008858																																					-52.6373	-57.0432
			-59.0463	-64.447	-59.0463	-51.6397		0.011973	0.008988	0.011973	0.008862																																					-52.6884	-57.0727
			-59.0801	-64.4536	-59.0801	-51.7706		0.011978	0.008992	0.011978	0.008866																																					-52.7392	-57.102
			-59.1136	-64.4603	-59.1136	-51.8994		0.011983	0.008995	0.011983	0.00887																																					-52.7898	-57.1313
			-59.147	-64.4669	-59.147	-52.026		0.011987	0.008999	0.011987	0.008873																																					-52.8403	-57.1605
			-59.1801	-64.4735	-59.1801	-52.1504		0.011992	0.009002	0.011992	0.008877																																					-52.8905	-57.1897
			-59.213	-64.4802	-59.213	-52.2727		0.011996	0.009006	0.011996	0.00888																																					-52.9406	-57.2187
			-59.2457	-64.4869	-59.2457	-52.3928		0.012001	0.009009	0.012001	0.008884																																					-52.9904	-57.2477
			-59.2781	-64.4936	-59.2781	-52.5108		0.012005	0.009013	0.012005	0.008887																																					-53.0401	-57.2766
			-59.3104	-64.5002	-59.3104	-52.6268		0.01201	0.009016	0.01201	0.00889																																					-53.0896	-57.3054
			-59.3425	-64.507	-59.3425	-52.7408		0.012014	0.00902	0.012014	0.008893																																					-53.1389	-57.3342
			-59.3743	-64.5137	-59.3743	-52.8528		0.012019	0.009023	0.012019	0.008896																																					-53.188	-57.3628
			-59.4059	-64.5204	-59.4059	-52.9629		0.012023	0.009027	0.012023	0.008899																																					-53.2369	-57.3914
			-59.4374	-64.5271	-59.4374	-53.0712		0.012028	0.00903	0.012028	0.008902																																					-53.2856	-57.4199
			-59.4686	-64.5339	-59.4686	-53.1777		0.012032	0.009034	0.012032	0.008905																																					-53.3341	-57.4484
			-59.4997	-64.5406	-59.4997	-53.2824		0.012036	0.009037	0.012036	0.008908																																					-53.3824	-57.4767
			-59.5305	-64.5474	-59.5305	-53.3854		0.012041	0.009041	0.012041	0.008911																																					-53.4306	-57.505
			-59.5612	-64.5542	-59.5612	-53.4868		0.012045	0.009044	0.012045	0.008914																																					-53.4785	-57.5332
			-59.5917	-64.5609	-59.5917	-53.5866		0.012049	0.009047	0.012049	0.008916																																					-53.5263	-57.5613
			-59.622	-64.5677	-59.622	-53.6848		0.012054	0.009051	0.012054	0.008919																																					-53.5739	-57.5893
			-59.6521	-64.5745	-59.6521	-53.7816		0.012058	0.009054	0.012058	0.008921																																					-53.6212	-57.6173
			-59.682	-64.5813	-59.682	-53.8769		0.012062	0.009058	0.012062	0.008924																																					-53.6684	-57.6452
			-59.7117	-64.5881	-59.7117	-53.9708		0.012066	0.009061	0.012066	0.008926																																					-53.7154	-57.673
			-59.7413	-64.5949	-59.7413	-54.0633		0.012071	0.009064	0.012071	0.008929																																					-53.7623	-57.7007
			-59.7707	-64.6018	-59.7707	-54.1545		0.012075	0.009068	0.012075	0.008931																																					-53.8089	-57.7284
			-59.7999	-64.6086	-59.7999	-54.2444		0.012079	0.009071	0.012079	0.008933																																					-53.8553	-57.756
			-59.8289	-64.6154	-59.8289	-54.3331		0.012083	0.009075	0.012083	0.008936																																					-53.9016	-57.7835
			-59.8578	-64.6223	-59.8578	-54.4205		0.012087	0.009078	0.012087	0.008938																																					-53.9477	-57.8109
			-59.8865	-64.6291	-59.8865	-54.5068		0.012092	0.009081	0.012092	0.00894																																					-53.9935	-57.8382
			-59.915	-64.636	-59.915	-54.592		0.012096	0.009085	0.012096	0.008942																																					-54.0392	-57.8655
			-59.9434	-64.6429	-59.9434	-54.676		0.0121	0.009088	0.0121	0.008944																																					-54.0848	-57.8927
			-59.9716	-64.6497	-59.9716	-54.7589		0.012104	0.009091	0.012104	0.008946																																					-54.1301	-57.9198
			-59.9997	-64.6566	-59.9997	-54.8408		0.012108	0.009095	0.012108	0.008948																																					-54.1752	-57.9468
			-60.0275	-64.6635	-60.0275	-54.9217		0.012112	0.009098	0.012112	0.00895																																					-54.2202	-57.9738
			-60.0553	-64.6704	-60.0553	-55.0016		0.012116	0.009101	0.012116	0.008952																																					-54.265	-58.0006
			-60.0829	-64.6773	-60.0829	-55.0805		0.01212	0.009105	0.01212	0.008954																																					-54.3096	-58.0274
			-60.1103	-64.6842	-60.1103	-55.1585		0.012124	0.009108	0.012124	0.008956																																					-54.354	-58.0542
			-60.1375	-64.691	-60.1375	-55.2356		0.012128	0.009111	0.012128	0.008958																																					-54.3531	-58.0328
			-60.1646	-64.6979	-60.1646	-55.3117		0.012132	0.009115	0.012132	0.008959																																					-54.3137	-57.9703
			-60.1914	-64.7046	-60.1914	-55.3868		0.012137	0.009118	0.012137	0.008961																																					-54.2406	-57.8722
			-60.2178	-64.7111	-60.2178	-55.4609		0.012141	0.009122	0.012141	0.008963																																					-54.1386	-57.7434
			-60.2437	-64.7171	-60.2437	-55.5338		0.012145	0.009125	0.012145	0.008964																																					-54.012	-57.5884
			-60.2688	-64.7225	-60.2688	-55.6054		0.01215	0.009129	0.01215	0.008966																																					-53.8648	-57.4117
			-60.2931	-64.7272	-60.2931	-55.6756		0.012154	0.009133	0.012154	0.008967																																					-53.7004	-57.2168
			-60.3164	-64.731	-60.3164	-55.7442		0.012159	0.009137	0.012159	0.008969																																					-53.5223	-57.0074
			-60.3385	-64.7336	-60.3385	-55.8111		0.012164	0.009141	0.012164	0.00897																																					-53.3331	-56.7863
			-60.3593	-64.7349	-60.3593	-55.8762		0.012169	0.009145	0.012169	0.008972																																					-53.1353	-56.5562
			-60.3787	-64.7349	-60.3787	-55.9395		0.012174	0.009149	0.012174	0.008973																																					-52.9311	-56.3194
			-60.3965	-64.7335	-60.3965	-56.0008		0.012179	0.009154	0.012179	0.008975																																					-52.7223	-56.0778
			-60.4129	-64.7305	-60.4129	-56.0602		0.012184	0.009158	0.012184	0.008976																																					-52.5107	-55.8333
			-60.4276	-64.7259	-60.4276	-56.1176		0.012189	0.009163	0.012189	0.008977																																					-52.2976	-55.5873
			-60.4407	-64.7197	-60.4407	-56.173		0.012195	0.009167	0.012195	0.008979																																					-52.0841	-55.341
			-60.4522	-64.712	-60.4522	-56.2264		0.0122	0.009172	0.0122	0.00898																																					-51.8714	-55.0956
			-60.4621	-64.7026	-60.4621	-56.2779		0.012206	0.009177	0.012206	0.008981																																					-51.6603	-54.852
			-60.4704	-64.6917	-60.4704	-56.3275		0.012212	0.009182	0.012212	0.008982																																					-51.4515	-54.611
			-60.4772	-64.6793	-60.4772	-56.3752		0.012217	0.009187	0.012217	0.008983																																					-51.2456	-54.3731
			-60.4825	-64.6654	-60.4825	-56.4211		0.012223	0.009192	0.012223	0.008984																																					-51.0433	-54.1391
			-60.4863	-64.6501	-60.4863	-56.4652		0.012229	0.009198	0.012229	0.008986																																					-50.8448	-53.9092
			-60.4888	-64.6335	-60.4888	-56.5076		0.012236	0.009203	0.012236	0.008987																																					-50.6505	-53.684
			-60.4899	-64.6155	-60.4899	-56.5484		0.012242	0.009209	0.012242	0.008988																																					-50.4608	-53.4636
			-60.4898	-64.5964	-60.4898	-56.5876		0.012248	0.009214	0.012248	0.008989																																					-50.2757	-53.2482
			-60.4885	-64.5761	-60.4885	-56.6254		0.012255	0.00922	0.012255	0.00899																																					-50.0955	-53.0381
			-60.4861	-64.5547	-60.4861	-56.6617		0.012261	0.009226	0.012261	0.008991																																					-49.9203	-52.8334
			-60.4826	-64.5323	-60.4826	-56.6966		0.012268	0.009232	0.012268	0.008992																																					-49.7501	-52.6341
			-60.4781	-64.509	-60.4781	-56.7303		0.012275	0.009238	0.012275	0.008993																																					-49.585	-52.4403
			-60.4727	-64.4848	-60.4727	-56.7628		0.012281	0.009244	0.012281	0.008994																																					-49.425	-52.252
			-60.4664	-64.4598	-60.4664	-56.7941		0.012288	0.00925	0.012288	0.008994																																					-49.27	-52.0691
			-60.4594	-64.4341	-60.4594	-56.8243		0.012295	0.009256	0.012295	0.008995																																					-49.1201	-51.8917
			-60.4516	-64.4077	-60.4516	-56.8534		0.012302	0.009262	0.012302	0.008996																																					-48.9752	-51.7197
			-60.4431	-64.3807	-60.4431	-56.8816		0.012309	0.009269	0.012309	0.008997																																					-48.8352	-51.5529
			-60.4341	-64.3532	-60.4341	-56.9089		0.012317	0.009275	0.012317	0.008998																																					-48.7001	-51.3914
			-60.4244	-64.3252	-60.4244	-56.9354		0.012324	0.009282	0.012324	0.008999																																					-48.5697	-51.235
			-60.4143	-64.2968	-60.4143	-56.961		0.012331	0.009288	0.012331	0.008999																																					-48.4439	-51.0836
			-60.4037	-64.2681	-60.4037	-56.9859		0.012338	0.009295	0.012338	0.009																																					-48.3227	-50.9371
			-60.3927	-64.239	-60.3927	-57.01		0.012346	0.009302	0.012346	0.009001																																					-48.2059	-50.7954
			-60.3813	-64.2096	-60.3813	-57.0336		0.012353	0.009309	0.012353	0.009001																																					-48.0934	-50.6584
			-60.3696	-64.18	-60.3696	-57.0565		0.012361	0.009315	0.012361	0.009002																																					-47.9851	-50.5258
			-60.3576	-64.1502	-60.3576	-57.0788		0.012369	0.009322	0.012369	0.009003																																					-47.8809	-50.3977
			-60.3453	-64.1202	-60.3453	-57.1006		0.012376	0.009329	0.012376	0.009004																																					-47.7806	-50.2739
			-60.3328	-64.0902	-60.3328	-57.1219		0.012384	0.009336	0.012384	0.009004																																					-47.6842	-50.1542
			-60.3202	-64.0601	-60.3202	-57.1427		0.012392	0.009344	0.012392	0.009005																																					-47.5915	-50.0386
			-60.3074	-64.0299	-60.3074	-57.1631		0.0124	0.009351	0.0124	0.009005																																					-47.5024	-49.9269
			-60.2945	-63.9997	-60.2945	-57.1831		0.012408	0.009358	0.012408	0.009006																																					-47.4168	-49.8189
			-60.2815	-63.9696	-60.2815	-57.2027		0.012415	0.009365	0.012415	0.009007																																					-47.3346	-49.7147
			-60.2684	-63.9395	-60.2684	-57.222		0.012423	0.009372	0.012423	0.009007																																					-47.2557	-49.6139
			-60.2553	-63.9095	-60.2553	-57.2409		0.012431	0.00938	0.012431	0.009008																																					-47.18	-49.5166
			-60.2422	-63.8795	-60.2422	-57.2596		0.01244	0.009387	0.01244	0.009008																																					-47.1075	-49.4226
			-60.2291	-63.8497	-60.2291	-57.278		0.012448	0.009395	0.012448	0.009009																																					-47.0379	-49.3318
			-60.2159	-63.8201	-60.2159	-57.2962		0.012456	0.009402	0.012456	0.009009																																					-46.9713	-49.2441
			-60.2029	-63.7905	-60.2029	-57.3141		0.012464	0.00941	0.012464	0.00901																																					-46.9075	-49.1595
			-60.1899	-63.7612	-60.1899	-57.3319		0.012472	0.009417	0.012472	0.00901																																					-46.8464	-49.0777
			-60.1769	-63.732	-60.1769	-57.3494		0.01248	0.009425	0.01248	0.009011																																					-46.788	-48.9987
			-60.1641	-63.7031	-60.1641	-57.3668		0.012489	0.009433	0.012489	0.009011																																					-46.7323	-48.9224
			-60.1513	-63.6743	-60.1513	-57.384		0.012497	0.00944	0.012497	0.009012																																					-46.679	-48.8488
			-60.1387	-63.6458	-60.1387	-57.4011		0.012505	0.009448	0.012505	0.009012																																					-46.6282	-48.7776
			-60.1262	-63.6176	-60.1262	-57.4181		0.012514	0.009456	0.012514	0.009012																																					-46.5798	-48.709
			-60.1138	-63.5896	-60.1138	-57.4349		0.012522	0.009464	0.012522	0.009013																																					-46.5337	-48.6427
			-60.1015	-63.5618	-60.1015	-57.4517		0.01253	0.009471	0.01253	0.009013																																					-46.4899	-48.5787
			-60.0894	-63.5343	-60.0894	-57.4684		0.012539	0.009479	0.012539	0.009014																																					-46.4483	-48.517
			-60.0775	-63.5071	-60.0775	-57.485		0.012547	0.009487	0.012547	0.009014																																					-46.4087	-48.4574
			-60.0657	-63.4802	-60.0657	-57.5015		0.012556	0.009495	0.012556	0.009014																																					-46.3713	-48.4
			-60.0542	-63.4536	-60.0542	-57.518		0.012564	0.009503	0.012564	0.009015																																					-46.3359	-48.3445
			-60.0427	-63.4272	-60.0427	-57.5344		0.012573	0.009511	0.012573	0.009015																																					-46.3024	-48.2911
			-60.0315	-63.4012	-60.0315	-57.5508		0.012581	0.009519	0.012581	0.009015																																					-46.2709	-48.2395
			-60.0205	-63.3755	-60.0205	-57.5672		0.01259	0.009527	0.01259	0.009016																																					-46.2412	-48.1899
			-60.0097	-63.35	-60.0097	-57.5835		0.012599	0.009535	0.012599	0.009016																																					-46.2134	-48.1421
			-59.999	-63.3249	-59.999	-57.5999		0.012607	0.009543	0.012607	0.009016																																					-46.1873	-48.096
			-59.9886	-63.3001	-59.9886	-57.6162		0.012616	0.009551	0.012616	0.009017																																					-46.1629	-48.0517
			-59.9784	-63.2756	-59.9784	-57.6325		0.012625	0.009559	0.012625	0.009017																																					-46.1402	-48.009
			-59.9684	-63.2514	-59.9684	-57.6489		0.012633	0.009568	0.012633	0.009017																																					-46.1192	-47.968
			-59.9586	-63.2275	-59.9586	-57.6652		0.012642	0.009576	0.012642	0.009018																																					-46.0998	-47.9286
			-59.949	-63.204	-59.949	-57.6816		0.012651	0.009584	0.012651	0.009018																																					-46.0819	-47.8908
			-59.9396	-63.1807	-59.9396	-57.698		0.012659	0.009592	0.012659	0.009018																																					-46.0656	-47.8545
			-59.9305	-63.1578	-59.9305	-57.7144		0.012668	0.0096	0.012668	0.009018																																					-46.0507	-47.8196
			-59.9215	-63.1352	-59.9215	-57.7308		0.012677	0.009609	0.012677	0.009019																																					-46.0373	-47.7863
			-59.9128	-63.113	-59.9128	-57.7473		0.012685	0.009617	0.012685	0.009019																																					-46.0253	-47.7543
			-59.9043	-63.091	-59.9043	-57.7638		0.012694	0.009625	0.012694	0.009019																																					-46.0147	-47.7238
			-59.8961	-63.0694	-59.8961	-57.7803		0.012703	0.009634	0.012703	0.009019																																					-46.0054	-47.6947
			-59.888	-63.048	-59.888	-57.7969		0.012712	0.009642	0.012712	0.00902																																					-45.9975	-47.6668
			-59.8802	-63.027	-59.8802	-57.8135		0.01272	0.00965	0.01272	0.00902																																					-45.9908	-47.6403
			-59.8726	-63.0063	-59.8726	-57.8302		0.012729	0.009659	0.012729	0.00902																																					-45.9855	-47.6151
			-59.8652	-62.9859	-59.8652	-57.8469		0.012738	0.009667	0.012738	0.00902																																					-45.9813	-47.5912
			-59.8581	-62.9658	-59.8581	-57.8636		0.012747	0.009675	0.012747	0.00902																																					-45.9783	-47.5685
			-59.8512	-62.9461	-59.8512	-57.8805		0.012755	0.009684	0.012755	0.009021																																					-45.9765	-47.547
			-59.8445	-62.9266	-59.8445	-57.8973		0.012764	0.009692	0.012764	0.009021																																					-45.9759	-47.5267
			-59.838	-62.9074	-59.838	-57.9143		0.012773	0.0097	0.012773	0.009021																																					-45.9764	-47.5076
			-59.8318	-62.8886	-59.8318	-57.9313		0.012782	0.009709	0.012782	0.009021																																					-45.9779	-47.4897
			-59.8257	-62.87	-59.8257	-57.9483		0.01279	0.009717	0.01279	0.009021																																					-45.9806	-47.4729
			-59.8199	-62.8518	-59.8199	-57.9654		0.012799	0.009726	0.012799	0.009021																																					-45.9843	-47.4572
			-59.8143	-62.8338	-59.8143	-57.9826		0.012808	0.009734	0.012808	0.009021																																					-45.989	-47.4426
			-59.809	-62.8162	-59.809	-57.9998		0.012817	0.009743	0.012817	0.009022																																					-45.9947	-47.4291
			-59.8038	-62.7988	-59.8038	-58.0171		0.012825	0.009751	0.012825	0.009022																																					-46.0013	-47.4166
			-59.7989	-62.7817	-59.7989	-58.0344		0.012834	0.009759	0.012834	0.009022																																					-46.009	-47.4053
			-59.7942	-62.7649	-59.7942	-58.0518		0.012843	0.009768	0.012843	0.009022																																					-46.0175	-47.3949
			-59.7897	-62.7484	-59.7897	-58.0693		0.012852	0.009776	0.012852	0.009022																																					-46.027	-47.3856
			-59.7854	-62.7322	-59.7854	-58.0868		0.01286	0.009785	0.01286	0.009022																																					-46.0373	-47.3773
			-59.7813	-62.7162	-59.7813	-58.1044		0.012869	0.009793	0.012869	0.009022																																					-46.0486	-47.37
			-59.7775	-62.7006	-59.7775	-58.1221		0.012878	0.009802	0.012878	0.009022																																					-46.0606	-47.3636
			-59.7738	-62.6852	-59.7738	-58.1398		0.012887	0.00981	0.012887	0.009023																																					-46.0735	-47.3582
			-59.7704	-62.6701	-59.7704	-58.1576		0.012895	0.009819	0.012895	0.009023																																					-46.0872	-47.3538
			-59.7672	-62.6552	-59.7672	-58.1755		0.012904	0.009827	0.012904	0.009023																																					-46.1018	-47.3503
			-59.7641	-62.6406	-59.7641	-58.1934		0.012913	0.009836	0.012913	0.009023																																					-46.117	-47.3477
			-59.7613	-62.6263	-59.7613	-58.2114		0.012922	0.009844	0.012922	0.009023																																					-46.1331	-47.346
			-59.7587	-62.6123	-59.7587	-58.2294		0.01293	0.009853	0.01293	0.009023																																					-46.1498	-47.3452
			-59.7563	-62.5985	-59.7563	-58.2476		0.012939	0.009861	0.012939	0.009023																																					-46.1673	-47.3453
			-59.7541	-62.585	-59.7541	-58.2657		0.012948	0.00987	0.012948	0.009023																																					-46.1855	-47.3463
			-59.7521	-62.5717	-59.7521	-58.284		0.012956	0.009878	0.012956	0.009023																																					-46.2044	-47.3481
			-59.7503	-62.5587	-59.7503	-58.3023		0.012965	0.009887	0.012965	0.009023																																					-46.224	-47.3508
			-59.7487	-62.5459	-59.7487	-58.3206		0.012974	0.009895	0.012974	0.009023																																					-46.2442	-47.3543
			-59.7472	-62.5334	-59.7472	-58.3391		0.012982	0.009903	0.012982	0.009023																																					-46.2651	-47.3586
			-59.746	-62.5211	-59.746	-58.3575		0.012991	0.009912	0.012991	0.009023																																					-46.2865	-47.3638
			-59.745	-62.5091	-59.745	-58.3761		0.013	0.00992	0.013	0.009023																																					-46.3086	-47.3697
			-59.7441	-62.4973	-59.7441	-58.3947		0.013008	0.009929	0.013008	0.009023																																					-46.3313	-47.3765
			-59.7435	-62.4858	-59.7435	-58.4133		0.013017	0.009937	0.013017	0.009023																																					-46.3546	-47.384
			-59.743	-62.4745	-59.743	-58.432		0.013025	0.009946	0.013025	0.009024																																					-46.3785	-47.3923
			-59.7427	-62.4634	-59.7427	-58.4508		0.013034	0.009954	0.013034	0.009024																																					-46.4029	-47.4013
			-59.7426	-62.4526	-59.7426	-58.4697		0.013042	0.009963	0.013042	0.009024																																					-46.4278	-47.4111
			-59.7427	-62.442	-59.7427	-58.4885		0.013051	0.009971	0.013051	0.009024																																					-46.4533	-47.4216
			-59.743	-62.4316	-59.743	-58.5075		0.01306	0.00998	0.01306	0.009024																																					-46.4793	-47.4329
			-59.7434	-62.4215	-59.7434	-58.5265		0.013068	0.009988	0.013068	0.009024																																					-46.5058	-47.4448
			-59.7441	-62.4116	-59.7441	-58.5455		0.013077	0.009996	0.013077	0.009024																																					-46.5328	-47.4575
			-59.7449	-62.4019	-59.7449	-58.5646		0.013085	0.010005	0.013085	0.009024																																					-46.5603	-47.4709
			-59.7458	-62.3925	-59.7458	-58.5838		0.013094	0.010013	0.013094	0.009024																																					-46.5883	-47.4849
			-59.747	-62.3832	-59.747	-58.603		0.013102	0.010022	0.013102	0.009024																																					-46.6167	-47.4996
			-59.7483	-62.3742	-59.7483	-58.6222		0.013111	0.01003	0.013111	0.009024																																					-46.6456	-47.515
			-59.7498	-62.3654	-59.7498	-58.6415		0.013119	0.010038	0.013119	0.009024																																					-46.6749	-47.531
			-59.7514	-62.3568	-59.7514	-58.6609		0.013127	0.010047	0.013127	0.009024																																					-46.7046	-47.5477
			-59.7533	-62.3484	-59.7533	-58.6803		0.013136	0.010055	0.013136	0.009024																																					-46.7347	-47.565
			-59.7552	-62.3402	-59.7552	-58.6997		0.013144	0.010063	0.013144	0.009024																																					-46.7653	-47.5829
			-59.7574	-62.3323	-59.7574	-58.7192		0.013153	0.010072	0.013153	0.009024																																					-46.7962	-47.6015
			-59.7597	-62.3245	-59.7597	-58.7387		0.013161	0.01008	0.013161	0.009024																																					-46.8276	-47.6206
			-59.7622	-62.317	-59.7622	-58.7583		0.013169	0.010088	0.013169	0.009024																																					-46.8593	-47.6403
			-59.7648	-62.3096	-59.7648	-58.7779		0.013178	0.010097	0.013178	0.009024																																					-46.8913	-47.6607
			-59.7676	-62.3025	-59.7676	-58.7976		0.013186	0.010105	0.013186	0.009024																																					-46.9238	-47.6815
			-59.7705	-62.2955	-59.7705	-58.8173		0.013194	0.010113	0.013194	0.009024																																					-46.9566	-47.703
			-59.7736	-62.2888	-59.7736	-58.837		0.013203	0.010122	0.013203	0.009024																																					-46.9897	-47.725
			-59.7768	-62.2822	-59.7768	-58.8568		0.013211	0.01013	0.013211	0.009024																																					-47.0231	-47.7476
			-59.7802	-62.2759	-59.7802	-58.8766		0.013219	0.010138	0.013219	0.009024																																					-47.0569	-47.7707
			-59.7837	-62.2697	-59.7837	-58.8965		0.013227	0.010146	0.013227	0.009023																																					-47.091	-47.7943
			-59.7874	-62.2637	-59.7874	-58.9164		0.013236	0.010155	0.013236	0.009023																																					-47.1254	-47.8184
			-59.7913	-62.2579	-59.7913	-58.9363		0.013244	0.010163	0.013244	0.009023																																					-47.1601	-47.843
			-59.7952	-62.2523	-59.7952	-58.9563		0.013252	0.010171	0.013252	0.009023																																					-47.1951	-47.8682
			-59.7993	-62.2469	-59.7993	-58.9763		0.01326	0.010179	0.01326	0.009023																																					-47.2304	-47.8938
			-59.8036	-62.2417	-59.8036	-58.9963		0.013268	0.010187	0.013268	0.009023																																					-47.2659	-47.9199
			-59.808	-62.2367	-59.808	-59.0164		0.013277	0.010196	0.013277	0.009023																																					-47.3017	-47.9465
			-59.8125	-62.2318	-59.8125	-59.0365		0.013285	0.010204	0.013285	0.009023																																					-47.3378	-47.9735
			-59.8172	-62.2271	-59.8172	-59.0566		0.013293	0.010212	0.013293	0.009023																																					-47.3741	-48.001
			-59.822	-62.2226	-59.822	-59.0767		0.013301	0.01022	0.013301	0.009023																																					-47.4107	-48.029
			-59.8269	-62.2183	-59.8269	-59.0969		0.013309	0.010228	0.013309	0.009023																																					-47.4475	-48.0573
			-59.832	-62.2141	-59.832	-59.1171		0.013317	0.010236	0.013317	0.009023																																					-47.4846	-48.0861
			-59.8372	-62.2102	-59.8372	-59.1373		0.013325	0.010244	0.013325	0.009023																																					-47.5218	-48.1153
			-59.8425	-62.2063	-59.8425	-59.1576		0.013333	0.010252	0.013333	0.009023																																					-47.5593	-48.145
			-59.8479	-62.2027	-59.8479	-59.1779		0.013341	0.01026	0.013341	0.009023																																					-47.5971	-48.175
			-59.8535	-62.1992	-59.8535	-59.1982		0.013349	0.010268	0.013349	0.009023																																					-47.635	-48.2054
			-59.8592	-62.1959	-59.8592	-59.2185		0.013357	0.010276	0.013357	0.009023																																					-47.6731	-48.2362
			-59.865	-62.1928	-59.865	-59.2389		0.013365	0.010284	0.013365	0.009023																																					-47.7114	-48.2674
			-59.871	-62.1898	-59.871	-59.2593		0.013373	0.010292	0.013373	0.009023																																					-47.7499	-48.2989
			-59.877	-62.187	-59.877	-59.2797		0.013381	0.0103	0.013381	0.009023																																					-47.7886	-48.3308
			-59.8832	-62.1844	-59.8832	-59.3001		0.013389	0.010308	0.013389	0.009023																																					-47.8275	-48.3631
			-59.8895	-62.1819	-59.8895	-59.3205		0.013397	0.010316	0.013397	0.009022																																					-47.8665	-48.3957
			-59.8959	-62.1795	-59.8959	-59.341		0.013405	0.010324	0.013405	0.009022																																					-47.9057	-48.4286
			-59.9024	-62.1774	-59.9024	-59.3614		0.013412	0.010332	0.013412	0.009022																																					-47.9451	-48.4618
			-59.909	-62.1754	-59.909	-59.3819		0.01342	0.01034	0.01342	0.009022																																					-47.9846	-48.4954
			-59.9157	-62.1735	-59.9157	-59.4024		0.013428	0.010348	0.013428	0.009022																																					-48.0243	-48.5293
			-59.9226	-62.1718	-59.9226	-59.4229		0.013436	0.010356	0.013436	0.009022																																					-48.0641	-48.5635
			-59.9295	-62.1702	-59.9295	-59.4434		0.013444	0.010364	0.013444	0.009022																																					-48.104	-48.598
			-59.9366	-62.1688	-59.9366	-59.464		0.013451	0.010372	0.013451	0.009022																																					-48.1441	-48.6328
			-59.9438	-62.1675	-59.9438	-59.4845		0.013459	0.010379	0.013459	0.009022																																					-48.1844	-48.6678
			-59.951	-62.1664	-59.951	-59.5051		0.013467	0.010387	0.013467	0.009022																																					-48.2247	-48.7032
			-59.9584	-62.1655	-59.9584	-59.5257		0.013474	0.010395	0.013474	0.009022																																					-48.2652	-48.7388
			-59.9659	-62.1646	-59.9659	-59.5463		0.013482	0.010403	0.013482	0.009022																																					-48.3058	-48.7746
			-59.9734	-62.1639	-59.9734	-59.5669		0.01349	0.010411	0.01349	0.009022																																					-48.3465	-48.8107
			-59.9811	-62.1634	-59.9811	-59.5875		0.013497	0.010418	0.013497	0.009022																																					-48.3873	-48.8471
			-59.9889	-62.163	-59.9889	-59.6081		0.013505	0.010426	0.013505	0.009021																																					-48.4282	-48.8837
			-59.9967	-62.1627	-59.9967	-59.6287		0.013513	0.010434	0.013513	0.009021																																					-48.4692	-48.9205
			-60.0047	-62.1626	-60.0047	-59.6493		0.01352	0.010441	0.01352	0.009021																																					-48.5103	-48.9576
			-60.0127	-62.1626	-60.0127	-59.67		0.013528	0.010449	0.013528	0.009021																																					-48.5515	-48.9948
			-60.0208	-62.1628	-60.0208	-59.6906		0.013535	0.010457	0.013535	0.009021																																					-48.5928	-49.0323
			-60.0291	-62.163	-60.0291	-59.7113		0.013543	0.010464	0.013543	0.009021																																					-48.6342	-49.07
			-60.0374	-62.1634	-60.0374	-59.7319		0.01355	0.010472	0.01355	0.009021																																					-48.6756	-49.1079
			-60.0458	-62.164	-60.0458	-59.7526		0.013558	0.01048	0.013558	0.009021																																					-48.7172	-49.146
			-60.0543	-62.1646	-60.0543	-59.7732		0.013565	0.010487	0.013565	0.009021																																					-48.7588	-49.1843
			-60.0628	-62.1654	-60.0628	-59.7939		0.013573	0.010495	0.013573	0.009021																																					-48.8004	-49.2227
			-60.0715	-62.1664	-60.0715	-59.8145		0.01358	0.010502	0.01358	0.009021																																					-48.8422	-49.2613
			-60.0802	-62.1674	-60.0802	-59.8352		0.013588	0.01051	0.013588	0.00902																																					-48.884	-49.3001
			-60.089	-62.1686	-60.089	-59.8558		0.013595	0.010517	0.013595	0.00902																																					-48.9258	-49.3391
			-60.0979	-62.1699	-60.0979	-59.8765		0.013602	0.010525	0.013602	0.00902																																					-48.9677	-49.3782
			-60.1069	-62.1713	-60.1069	-59.8972		0.01361	0.010532	0.01361	0.00902																																					-49.0097	-49.4174
			-60.116	-62.1728	-60.116	-59.9178		0.013617	0.01054	0.013617	0.00902																																					-49.0517	-49.4568
			-60.1251	-62.1745	-60.1251	-59.9385		0.013624	0.010547	0.013624	0.00902																																					-49.0937	-49.4964
			-60.1343	-62.1762	-60.1343	-59.9591		0.013632	0.010555	0.013632	0.00902																																					-49.1358	-49.5361
			-60.1436	-62.1781	-60.1436	-59.9797		0.013639	0.010562	0.013639	0.00902																																					-49.1779	-49.5759
			-60.1529	-62.1801	-60.1529	-60.0004		0.013646	0.010569	0.013646	0.00902																																					-49.2201	-49.6158
			-60.1623	-62.1822	-60.1623	-60.021		0.013653	0.010577	0.013653	0.00902																																					-49.2623	-49.6559
			-60.1718	-62.1844	-60.1718	-60.0416		0.013661	0.010584	0.013661	0.00902																																					-49.3045	-49.696
			-60.1814	-62.1868	-60.1814	-60.0623		0.013668	0.010591	0.013668	0.009019																																					-49.3468	-49.7363
			-60.191	-62.1892	-60.191	-60.0829		0.013675	0.010599	0.013675	0.009019																																					-49.389	-49.7767
			-60.2007	-62.1918	-60.2007	-60.1035		0.013682	0.010606	0.013682	0.009019																																					-49.4313	-49.8171
			-60.2105	-62.1944	-60.2105	-60.1241		0.013689	0.010613	0.013689	0.009019																																					-49.4736	-49.8577
			-60.2203	-62.1972	-60.2203	-60.1447		0.013697	0.010621	0.013697	0.009019																																					-49.5159	-49.8983
			-60.2302	-62.2001	-60.2302	-60.1653		0.013704	0.010628	0.013704	0.009019																																					-49.5583	-49.9391
			-60.2401	-62.203	-60.2401	-60.1859		0.013711	0.010635	0.013711	0.009019																																					-49.6006	-49.9799
			-60.2502	-62.2061	-60.2502	-60.2064		0.013718	0.010642	0.013718	0.009019																																					-49.6429	-50.0208
			-60.2602	-62.2093	-60.2602	-60.227		0.013725	0.010649	0.013725	0.009019																																					-49.6853	-50.0618
			-60.2704	-62.2126	-60.2704	-60.2475		0.013732	0.010657	0.013732	0.009019																																					-49.7276	-50.1028
			-60.2806	-62.2159	-60.2806	-60.268		0.013739	0.010664	0.013739	0.009018																																					-49.77	-50.1439
			-60.2908	-62.2194	-60.2908	-60.2886		0.013746	0.010671	0.013746	0.009018																																					-49.8123	-50.185
			-60.3011	-62.223	-60.3011	-60.3091		0.013753	0.010678	0.013753	0.009018																																					-49.8547	-50.2262
			-60.3115	-62.2267	-60.3115	-60.3296		0.01376	0.010685	0.01376	0.009018																																					-49.897	-50.2675
			-60.3219	-62.2304	-60.3219	-60.3501		0.013767	0.010692	0.013767	0.009018																																					-49.9393	-50.3088
			-60.3324	-62.2343	-60.3324	-60.3705		0.013774	0.010699	0.013774	0.009018																																					-49.9816	-50.3501
			-60.3429	-62.2382	-60.3429	-60.391		0.013781	0.010706	0.013781	0.009018																																					-50.0239	-50.3915
			-60.3535	-62.2422	-60.3535	-60.4114		0.013788	0.010713	0.013788	0.009018																																					-50.0662	-50.4329
			-60.3641	-62.2464	-60.3641	-60.4319		0.013795	0.01072	0.013795	0.009018																																					-50.1085	-50.4744
			-60.3748	-62.2506	-60.3748	-60.4523		0.013801	0.010727	0.013801	0.009018																																					-50.1507	-50.5158
			-60.3855	-62.2549	-60.3855	-60.4727		0.013808	0.010734	0.013808	0.009017																																					-50.1929	-50.5573
			-60.3963	-62.2593	-60.3963	-60.493		0.013815	0.010741	0.013815	0.009017																																					-50.2351	-50.5988
			-60.4071	-62.2637	-60.4071	-60.5134		0.013822	0.010748	0.013822	0.009017																																					-50.2773	-50.6404
			-60.418	-62.2683	-60.418	-60.5337		0.013829	0.010755	0.013829	0.009017																																					-50.3194	-50.6819
			-60.4289	-62.2729	-60.4289	-60.5541		0.013835	0.010762	0.013835	0.009017																																					-50.3615	-50.7235
			-60.4398	-62.2776	-60.4398	-60.5744		0.013842	0.010769	0.013842	0.009017																																					-50.4036	-50.7651
			-60.4508	-62.2824	-60.4508	-60.5947		0.013849	0.010776	0.013849	0.009017																																					-50.4456	-50.8066
			-60.4619	-62.2873	-60.4619	-60.6149		0.013856	0.010783	0.013856	0.009017																																					-50.4876	-50.8482
			-60.473	-62.2923	-60.473	-60.6352		0.013862	0.01079	0.013862	0.009017																																					-50.5296	-50.8898
			-60.4841	-62.2973	-60.4841	-60.6554		0.013869	0.010797	0.013869	0.009016																																					-50.5715	-50.9313
			-60.4953	-62.3024	-60.4953	-60.6757		0.013876	0.010803	0.013876	0.009016																																					-50.6134	-50.9729
			-60.5065	-62.3076	-60.5065	-60.6958		0.013882	0.01081	0.013882	0.009016																																					-50.6552	-51.0144
			-60.5177	-62.3129	-60.5177	-60.716		0.013889	0.010817	0.013889	0.009016																																					-50.697	-51.056
			-60.529	-62.3182	-60.529	-60.7362		0.013896	0.010824	0.013896	0.009016																																					-50.7388	-51.0975
			-60.5403	-62.3236	-60.5403	-60.7563		0.013902	0.01083	0.013902	0.009016																																					-50.7805	-51.139
			-60.5517	-62.3291	-60.5517	-60.7764		0.013909	0.010837	0.013909	0.009016																																					-50.8221	-51.1805
			-60.5631	-62.3346	-60.5631	-60.7965		0.013915	0.010844	0.013915	0.009016																																					-50.8637	-51.2219
			-60.5745	-62.3402	-60.5745	-60.8166		0.013922	0.010851	0.013922	0.009016																																					-50.9053	-51.2634
			-60.5859	-62.3459	-60.5859	-60.8366		0.013928	0.010857	0.013928	0.009015																																					-50.9468	-51.3048
			-60.5974	-62.3516	-60.5974	-60.8566		0.013935	0.010864	0.013935	0.009015																																					-50.9882	-51.3462
			-60.609	-62.3575	-60.609	-60.8766		0.013941	0.010871	0.013941	0.009015																																					-51.0296	-51.3875
			-60.6205	-62.3633	-60.6205	-60.8966		0.013948	0.010877	0.013948	0.009015																																					-51.071	-51.4288
			-60.6321	-62.3693	-60.6321	-60.9166		0.013954	0.010884	0.013954	0.009015																																					-51.1122	-51.4701
			-60.6437	-62.3753	-60.6437	-60.9365		0.013961	0.01089	0.013961	0.009015																																					-51.1535	-51.5113
			-60.6554	-62.3814	-60.6554	-60.9564		0.013967	0.010897	0.013967	0.009015																																					-51.1946	-51.5525
			-60.667	-62.3875	-60.667	-60.9763		0.013974	0.010903	0.013974	0.009015																																					-51.2357	-51.5937
			-60.6787	-62.3937	-60.6787	-60.9961		0.01398	0.01091	0.01398	0.009015																																					-51.2767	-51.6348
			-60.6905	-62.3999	-60.6905	-61.016		0.013986	0.010917	0.013986	0.009014																																					-51.3177	-51.6758
			-60.7022	-62.4062	-60.7022	-61.0358		0.013993	0.010923	0.013993	0.009014																																					-51.3586	-51.7169
			-60.714	-62.4126	-60.714	-61.0555		0.013999	0.01093	0.013999	0.009014																																					-51.3995	-51.7578
			-60.7258	-62.419	-60.7258	-61.0753		0.014005	0.010936	0.014005	0.009014																																					-51.4402	-51.7987
			-60.7376	-62.4255	-60.7376	-61.095		0.014012	0.010942	0.014012	0.009014																																					-51.4809	-51.8396
			-60.7495	-62.432	-60.7495	-61.1147		0.014018	0.010949	0.014018	0.009014																																					-51.5216	-51.8804
			-60.7614	-62.4386	-60.7614	-61.1344		0.014024	0.010955	0.014024	0.009014																																					-51.5621	-51.9211
			-60.7733	-62.4453	-60.7733	-61.154		0.014031	0.010962	0.014031	0.009014																																					-51.6026	-51.9618
			-60.7852	-62.452	-60.7852	-61.1736		0.014037	0.010968	0.014037	0.009014																																					-51.643	-52.0025
			-60.7971	-62.4587	-60.7971	-61.1932		0.014043	0.010975	0.014043	0.009013																																					-51.6834	-52.043
			-60.8091	-62.4655	-60.8091	-61.2128		0.014049	0.010981	0.014049	0.009013																																					-51.7237	-52.0835
			-60.8211	-62.4724	-60.8211	-61.2323		0.014055	0.010987	0.014055	0.009013																																					-51.7639	-52.124
			-60.8331	-62.4793	-60.8331	-61.2518		0.014062	0.010994	0.014062	0.009013																																					-51.804	-52.1643
			-60.8451	-62.4862	-60.8451	-61.2713		0.014068	0.011	0.014068	0.009013																																					-51.844	-52.2046
			-60.8572	-62.4932	-60.8572	-61.2908		0.014074	0.011006	0.014074	0.009013																																					-51.884	-52.2449
			-60.8692	-62.5002	-60.8692	-61.3102		0.01408	0.011013	0.01408	0.009013																																					-51.9239	-52.285
			-60.8813	-62.5073	-60.8813	-61.3296		0.014086	0.011019	0.014086	0.009013																																					-51.9637	-52.3251
			-60.8934	-62.5144	-60.8934	-61.3489		0.014092	0.011025	0.014092	0.009012																																					-52.0035	-52.3652
			-60.9055	-62.5216	-60.9055	-61.3683		0.014098	0.011031	0.014098	0.009012																																					-52.0431	-52.4051
			-60.9176	-62.5288	-60.9176	-61.3876		0.014104	0.011038	0.014104	0.009012																																					-52.0827	-52.445
			-60.9298	-62.5361	-60.9298	-61.4068		0.014111	0.011044	0.014111	0.009012																																					-52.1222	-52.4848
			-60.9419	-62.5434	-60.9419	-61.4261		0.014117	0.01105	0.014117	0.009012																																					-52.1616	-52.5245
			-60.9541	-62.5507	-60.9541	-61.4453		0.014123	0.011056	0.014123	0.009012																																					-52.201	-52.5642
			-60.9663	-62.5581	-60.9663	-61.4645		0.014129	0.011062	0.014129	0.009012																																					-52.2402	-52.6037
			-60.9785	-62.5656	-60.9785	-61.4836		0.014135	0.011068	0.014135	0.009012																																					-52.2794	-52.6432
			-60.9907	-62.573	-60.9907	-61.5027		0.014141	0.011075	0.014141	0.009012																																					-52.3185	-52.6826
			-61.0029	-62.5805	-61.0029	-61.5218		0.014147	0.011081	0.014147	0.009011																																					-52.3575	-52.7219
			-61.0151	-62.5881	-61.0151	-61.5409		0.014153	0.011087	0.014153	0.009011																																					-52.3964	-52.7612
			-61.0273	-62.5956	-61.0273	-61.5599		0.014158	0.011093	0.014158	0.009011																																					-52.4352	-52.8003
			-61.0396	-62.6033	-61.0396	-61.5789		0.014164	0.011099	0.014164	0.009011																																					-52.4739	-52.8394
			-61.0519	-62.6109	-61.0519	-61.5979		0.01417	0.011105	0.01417	0.009011																																					-52.5126	-52.8784
			-61.0641	-62.6186	-61.0641	-61.6168		0.014176	0.011111	0.014176	0.009011																																					-52.5512	-52.9173
			-61.0764	-62.6263	-61.0764	-61.6357		0.014182	0.011117	0.014182	0.009011																																					-52.5897	-52.9561
			-61.0887	-62.6341	-61.0887	-61.6546		0.014188	0.011123	0.014188	0.009011																																					-52.6281	-52.9949
			-61.101	-62.6418	-61.101	-61.6734		0.014194	0.011129	0.014194	0.00901																																					-52.6664	-53.0335
			-61.1133	-62.6497	-61.1133	-61.6922		0.0142	0.011135	0.0142	0.00901																																					-52.7046	-53.0721
			-61.1256	-62.6575	-61.1256	-61.711		0.014205	0.011141	0.014205	0.00901																																					-52.7427	-53.1106
			-61.1379	-62.6654	-61.1379	-61.7297		0.014211	0.011147	0.014211	0.00901																																					-52.7807	-53.1489
			-61.1502	-62.6733	-61.1502	-61.7484		0.014217	0.011153	0.014217	0.00901																																					-52.8187	-53.1872
			-61.1626	-62.6812	-61.1626	-61.7671		0.014223	0.011159	0.014223	0.00901																																					-52.8565	-53.2254
			-61.1749	-62.6892	-61.1749	-61.7857		0.014229	0.011165	0.014229	0.00901																																					-52.8943	-53.2635
			-61.1872	-62.6972	-61.1872	-61.8043		0.014234	0.011171	0.014234	0.00901																																					-52.932	-53.3015
			-61.1996	-62.7052	-61.1996	-61.8229		0.01424	0.011177	0.01424	0.009009																																					-52.9696	-53.3395
			-61.2119	-62.7133	-61.2119	-61.8415		0.014246	0.011183	0.014246	0.009009																																					-53.0071	-53.3773
			-61.2243	-62.7214	-61.2243	-61.86		0.014251	0.011188	0.014251	0.009009																																					-53.0445	-53.415
			-61.2367	-62.7295	-61.2367	-61.8784		0.014257	0.011194	0.014257	0.009009																																					-53.0818	-53.4527
			-61.249	-62.7376	-61.249	-61.8969		0.014263	0.0112	0.014263	0.009009																																					-53.119	-53.4902
			-61.2614	-62.7458	-61.2614	-61.9153		0.014269	0.011206	0.014269	0.009009																																					-53.1561	-53.5277
			-61.2737	-62.7539	-61.2737	-61.9336		0.014274	0.011212	0.014274	0.009009																																					-53.1932	-53.565
			-61.2861	-62.7622	-61.2861	-61.952		0.01428	0.011218	0.01428	0.009009																																					-53.2301	-53.6023
			-61.2985	-62.7704	-61.2985	-61.9703		0.014285	0.011223	0.014285	0.009009																																					-53.2669	-53.6395
			-61.3108	-62.7786	-61.3108	-61.9886		0.014291	0.011229	0.014291	0.009008																																					-53.3037	-53.6765
			-61.3232	-62.7869	-61.3232	-62.0068		0.014297	0.011235	0.014297	0.009008																																					-53.3403	-53.7135
			-61.3356	-62.7952	-61.3356	-62.025		0.014302	0.011241	0.014302	0.009008																																					-53.3769	-53.7504
			-61.348	-62.8035	-61.348	-62.0431		0.014308	0.011246	0.014308	0.009008																																					-53.4134	-53.7872
			-61.3603	-62.8119	-61.3603	-62.0613		0.014313	0.011252	0.014313	0.009008																																					-53.4498	-53.8238
			-61.3727	-62.8202	-61.3727	-62.0794		0.014319	0.011258	0.014319	0.009008																																					-53.486	-53.8604
			-61.3851	-62.8286	-61.3851	-62.0974		0.014324	0.011263	0.014324	0.009008																																					-53.5222	-53.8969
			-61.3974	-62.837	-61.3974	-62.1155		0.01433	0.011269	0.01433	0.009008																																					-53.5583	-53.9333
			-61.4098	-62.8454	-61.4098	-62.1334		0.014335	0.011275	0.014335	0.009007																																					-53.5943	-53.9696
			-61.4222	-62.8539	-61.4222	-62.1514		0.014341	0.01128	0.014341	0.009007																																					-53.6302	-54.0058
			-61.4345	-62.8623	-61.4345	-62.1693		0.014346	0.011286	0.014346	0.009007																																					-53.666	-54.0419
			-61.4469	-62.8708	-61.4469	-62.1872		0.014352	0.011292	0.014352	0.009007																																					-53.7017	-54.0778
			-61.4593	-62.8793	-61.4593	-62.2051		0.014357	0.011297	0.014357	0.009007																																					-53.7373	-54.1137
			-61.4716	-62.8878	-61.4716	-62.2229		0.014363	0.011303	0.014363	0.009007																																					-53.7729	-54.1495
			-61.484	-62.8963	-61.484	-62.2407		0.014368	0.011308	0.014368	0.009007																																					-53.8083	-54.1852
			-61.4963	-62.9048	-61.4963	-62.2584		0.014374	0.011314	0.014374	0.009007																																					-53.8436	-54.2208
			-61.5087	-62.9134	-61.5087	-62.2761		0.014379	0.01132	0.014379	0.009007																																					-53.8788	-54.2563
			-61.521	-62.922	-61.521	-62.2938		0.014384	0.011325	0.014384	0.009006																																					-53.914	-54.2917
			-61.5333	-62.9306	-61.5333	-62.3114		0.01439	0.011331	0.01439	0.009006																																					-53.949	-54.327
			-61.5457	-62.9391	-61.5457	-62.329		0.014395	0.011336	0.014395	0.009006																																					-53.984	-54.3622
			-61.558	-62.9478	-61.558	-62.3466		0.0144	0.011342	0.0144	0.009006																																					-54.0188	-54.3973
			-61.5703	-62.9564	-61.5703	-62.3641		0.014406	0.011347	0.014406	0.009006																																					-54.0536	-54.4323
			-61.5826	-62.965	-61.5826	-62.3816		0.014411	0.011353	0.014411	0.009006																																					-54.0882	-54.4672
			-61.5949	-62.9737	-61.5949	-62.3991		0.014416	0.011358	0.014416	0.009006																																					-54.1228	-54.5019
			-61.6073	-62.9823	-61.6073	-62.4165		0.014422	0.011364	0.014422	0.009006																																					-54.1572	-54.5366
			-61.6195	-62.991	-61.6195	-62.4339		0.014427	0.011369	0.014427	0.009005																																					-54.1916	-54.5712
			-61.6318	-62.9997	-61.6318	-62.4512		0.014432	0.011374	0.014432	0.009005																																					-54.2259	-54.6057
			-61.6441	-63.0084	-61.6441	-62.4685		0.014437	0.01138	0.014437	0.009005																																					-54.26	-54.6401
			-61.6564	-63.0171	-61.6564	-62.4858		0.014443	0.011385	0.014443	0.009005																																					-54.2941	-54.6744
			-61.6687	-63.0258	-61.6687	-62.5031		0.014448	0.011391	0.014448	0.009005																																					-54.3281	-54.7086
			-61.6809	-63.0345	-61.6809	-62.5203		0.014453	0.011396	0.014453	0.009005																																					-54.362	-54.7426
			-61.6932	-63.0433	-61.6932	-62.5374		0.014458	0.011401	0.014458	0.009005																																					-54.3958	-54.7766
			-61.7055	-63.052	-61.7055	-62.5546		0.014464	0.011407	0.014464	0.009005																																					-54.4295	-54.8105
			-61.7177	-63.0607	-61.7177	-62.5717		0.014469	0.011412	0.014469	0.009004																																					-54.4631	-54.8443
			-61.7299	-63.0695	-61.7299	-62.5887		0.014474	0.011417	0.014474	0.009004																																					-54.4966	-54.878
			-61.7422	-63.0783	-61.7422	-62.6058		0.014479	0.011423	0.014479	0.009004																																					-54.53	-54.9115
			-61.7544	-63.087	-61.7544	-62.6227		0.014484	0.011428	0.014484	0.009004																																					-54.5633	-54.945
			-61.7666	-63.0958	-61.7666	-62.6397		0.014489	0.011433	0.014489	0.009004																																					-54.5965	-54.9784
			-61.7788	-63.1046	-61.7788	-62.6566		0.014494	0.011439	0.014494	0.009004																																					-54.6296	-55.0117
			-61.791	-63.1134	-61.791	-62.6735		0.0145	0.011444	0.0145	0.009004																																					-54.6626	-55.0448
			-61.8031	-63.1222	-61.8031	-62.6903		0.014505	0.011449	0.014505	0.009004																																					-54.6956	-55.0779
			-61.8153	-63.131	-61.8153	-62.7072		0.01451	0.011454	0.01451	0.009003																																					-54.7284	-55.1109
			-61.8275	-63.1398	-61.8275	-62.7239		0.014515	0.01146	0.014515	0.009003																																					-54.7611	-55.1438
			-61.8396	-63.1487	-61.8396	-62.7407		0.01452	0.011465	0.01452	0.009003																																					-54.7938	-55.1765
			-61.8518	-63.1575	-61.8518	-62.7574		0.014525	0.01147	0.014525	0.009003																																					-54.8263	-55.2092
			-61.8639	-63.1663	-61.8639	-62.774		0.01453	0.011475	0.01453	0.009003																																					-54.8588	-55.2418
			-61.876	-63.1751	-61.876	-62.7907		0.014535	0.011481	0.014535	0.009003																																					-54.8911	-55.2743
			-61.8881	-63.184	-61.8881	-62.8072		0.01454	0.011486	0.01454	0.009003																																					-54.9234	-55.3066
			-61.9002	-63.1928	-61.9002	-62.8238		0.014545	0.011491	0.014545	0.009003																																					-54.9556	-55.3389
			-61.9123	-63.2017	-61.9123	-62.8403		0.01455	0.011496	0.01455	0.009003																																					-54.9876	-55.3711
			-61.9244	-63.2105	-61.9244	-62.8568		0.014555	0.011501	0.014555	0.009002																																					-55.0196	-55.4031
			-61.9364	-63.2194	-61.9364	-62.8732		0.01456	0.011506	0.01456	0.009002																																					-55.0515	-55.4351
			-61.9485	-63.2282	-61.9485	-62.8897		0.014565	0.011512	0.014565	0.009002																																					-55.0833	-55.467
			-61.9605	-63.2371	-61.9605	-62.906		0.01457	0.011517	0.01457	0.009002																																					-55.115	-55.4988
			-61.9726	-63.2459	-61.9726	-62.9224		0.014575	0.011522	0.014575	0.009002																																					-55.1466	-55.5305
			-61.9846	-63.2548	-61.9846	-62.9387		0.01458	0.011527	0.01458	0.009002																																					-55.1781	-55.562
			-61.9966	-63.2637	-61.9966	-62.9549		0.014585	0.011532	0.014585	0.009002																																					-55.2095	-55.5935
			-62.0086	-63.2725	-62.0086	-62.9712		0.01459	0.011537	0.01459	0.009002																																					-55.2408	-55.6249
			-62.0206	-63.2814	-62.0206	-62.9874		0.014595	0.011542	0.014595	0.009001																																					-55.272	-55.6562
			-62.0325	-63.2903	-62.0325	-63.0035		0.014599	0.011547	0.014599	0.009001																																					-55.3032	-55.6874
			-62.0445	-63.2991	-62.0445	-63.0196		0.014604	0.011552	0.014604	0.009001																																					-55.3342	-55.7184
			-62.0564	-63.308	-62.0564	-63.0357		0.014609	0.011557	0.014609	0.009001																																					-55.3652	-55.7494
			-62.0684	-63.3169	-62.0684	-63.0518		0.014614	0.011562	0.014614	0.009001																																					-55.396	-55.7803
			-62.0803	-63.3257	-62.0803	-63.0678		0.014619	0.011567	0.014619	0.009001																																					-55.4268	-55.8111
			-62.0922	-63.3346	-62.0922	-63.0838		0.014624	0.011572	0.014624	0.009001																																					-55.4574	-55.8418
			-62.1041	-63.3435	-62.1041	-63.0997		0.014628	0.011577	0.014628	0.009001																																					-55.488	-55.8724
			-62.1159	-63.3523	-62.1159	-63.1156		0.014633	0.011582	0.014633	0.009																																					-55.5185	-55.9029
			-62.1278	-63.3612	-62.1278	-63.1315		0.014638	0.011587	0.014638	0.009																																					-55.5489	-55.9333
			-62.1396	-63.3701	-62.1396	-63.1473		0.014643	0.011592	0.014643	0.009																																					-55.5792	-55.9636
			-62.1515	-63.3789	-62.1515	-63.1631		0.014648	0.011597	0.014648	0.009																																					-55.6094	-55.9938
			-62.1633	-63.3878	-62.1633	-63.1789		0.014652	0.011602	0.014652	0.009																																					-55.6395	-56.024
			-62.1751	-63.3966	-62.1751	-63.1946		0.014657	0.011607	0.014657	0.009																																					-55.6695	-56.054
			-62.1869	-63.4055	-62.1869	-63.2103		0.014662	0.011612	0.014662	0.009																																					-55.6995	-56.0839
			-62.1987	-63.4143	-62.1987	-63.2259		0.014667	0.011617	0.014667	0.009																																					-55.7293	-56.1137
			-62.2104	-63.4232	-62.2104	-63.2415		0.014671	0.011622	0.014671	0.009																																					-55.759	-56.1435
			-62.2222	-63.4321	-62.2222	-63.2571		0.014676	0.011627	0.014676	0.008999																																					-55.7887	-56.1731
			-62.2339	-63.4409	-62.2339	-63.2727		0.014681	0.011631	0.014681	0.008999																																					-55.8183	-56.2027
			-62.2456	-63.4497	-62.2456	-63.2882		0.014685	0.011636	0.014685	0.008999																																					-55.8477	-56.2321
			-62.2573	-63.4586	-62.2573	-63.3036		0.01469	0.011641	0.01469	0.008999																																					-55.8771	-56.2615
			-62.269	-63.4674	-62.269	-63.3191		0.014695	0.011646	0.014695	0.008999																																					-55.9064	-56.2907
			-62.2807	-63.4763	-62.2807	-63.3345		0.0147	0.011651	0.0147	0.008999																																					-55.9356	-56.3199
			-62.2924	-63.4851	-62.2924	-63.3498		0.014704	0.011656	0.014704	0.008999																																					-55.9648	-56.349
			-62.304	-63.4939	-62.304	-63.3652		0.014709	0.011661	0.014709	0.008999																																					-55.9938	-56.378
			-62.3156	-63.5027	-62.3156	-63.3805		0.014713	0.011665	0.014713	0.008998																																					-56.0227	-56.4068
			-62.3273	-63.5116	-62.3273	-63.3957		0.014718	0.01167	0.014718	0.008998																																					-56.0516	-56.4356
			-62.3388	-63.5204	-62.3388	-63.411		0.014723	0.011675	0.014723	0.008998																																					-56.0804	-56.4643
			-62.3504	-63.5292	-62.3504	-63.4261		0.014727	0.01168	0.014727	0.008998																																					-56.109	-56.4929
			-62.362	-63.538	-62.362	-63.4413		0.014732	0.011684	0.014732	0.008998																																					-56.1376	-56.5215
			-62.3735	-63.5468	-62.3735	-63.4564		0.014736	0.011689	0.014736	0.008998																																					-56.1661	-56.5499
			-62.3851	-63.5556	-62.3851	-63.4715		0.014741	0.011694	0.014741	0.008998																																					-56.1945	-56.5782
			-62.3966	-63.5644	-62.3966	-63.4866		0.014746	0.011699	0.014746	0.008998																																					-56.2229	-56.6065
			-62.4081	-63.5732	-62.4081	-63.5016		0.01475	0.011703	0.01475	0.008997																																					-56.2511	-56.6346
			-62.4196	-63.582	-62.4196	-63.5165		0.014755	0.011708	0.014755	0.008997																																					-56.2792	-56.6627
			-62.4311	-63.5907	-62.4311	-63.5315		0.014759	0.011713	0.014759	0.008997																																					-56.3073	-56.6906
			-62.4425	-63.5995	-62.4425	-63.5464		0.014764	0.011718	0.014764	0.008997																																					-56.3353	-56.7185
			-62.454	-63.6083	-62.454	-63.5613		0.014768	0.011722	0.014768	0.008997																																					-56.3632	-56.7463
			-62.4654	-63.617	-62.4654	-63.5761		0.014773	0.011727	0.014773	0.008997																																					-56.391	-56.774
			-62.4768	-63.6258	-62.4768	-63.5909		0.014777	0.011732	0.014777	0.008997																																					-56.4187	-56.8016
			-62.4882	-63.6345	-62.4882	-63.6057		0.014782	0.011736	0.014782	0.008997																																					-56.4463	-56.8291
			-62.4995	-63.6433	-62.4995	-63.6204		0.014786	0.011741	0.014786	0.008997																																					-56.4739	-56.8566
			-62.5109	-63.652	-62.5109	-63.6351		0.014791	0.011746	0.014791	0.008996																																					-56.5013	-56.8839
			-62.5222	-63.6607	-62.5222	-63.6498		0.014795	0.01175	0.014795	0.008996																																					-56.5287	-56.9111
			-62.5336	-63.6694	-62.5336	-63.6644		0.0148	0.011755	0.0148	0.008996																																					-56.556	-56.9383
			-62.5449	-63.6782	-62.5449	-63.679		0.014804	0.01176	0.014804	0.008996																																					-56.5832	-56.9654
			-62.5562	-63.6869	-62.5562	-63.6936		0.014809	0.011764	0.014809	0.008996																																					-56.5634	-56.9452
			-62.5674	-63.6955	-62.5674	-63.708		0.014813	0.011769	0.014813	0.008996																																					-56.5036	-56.8846
			-62.5784	-63.704	-62.5784	-63.7223		0.014818	0.011774	0.014818	0.008996																																					-56.409	-56.789
			-62.5892	-63.7122	-62.5892	-63.7363		0.014822	0.011779	0.014822	0.008996																																					-56.2843	-56.6631
			-62.5996	-63.72	-62.5996	-63.7499		0.014827	0.011784	0.014827	0.008995																																					-56.1341	-56.5115
			-62.6094	-63.7273	-62.6094	-63.7628		0.014832	0.011789	0.014832	0.008995																																					-55.9626	-56.3384
			-62.6184	-63.7337	-62.6184	-63.7748		0.014837	0.011794	0.014837	0.008995																																					-55.7733	-56.1475
			-62.6265	-63.7392	-62.6265	-63.7859		0.014842	0.011799	0.014842	0.008995																																					-55.5698	-55.9422
			-62.6334	-63.7437	-62.6334	-63.7958		0.014847	0.011805	0.014847	0.008995																																					-55.3548	-55.7253
			-62.6392	-63.7468	-62.6392	-63.8044		0.014853	0.01181	0.014853	0.008995																																					-55.131	-55.4995
			-62.6435	-63.7486	-62.6435	-63.8116		0.014858	0.011816	0.014858	0.008995																																					-54.9006	-55.2671
			-62.6465	-63.749	-62.6465	-63.8172		0.014864	0.011822	0.014864	0.008995																																					-54.6655	-55.03
			-62.6479	-63.7478	-62.6479	-63.8213		0.014869	0.011827	0.014869	0.008994																																					-54.4274	-54.7899
			-62.6478	-63.7452	-62.6478	-63.8237		0.014875	0.011834	0.014875	0.008994																																					-54.1878	-54.5483
			-62.6461	-63.7409	-62.6461	-63.8245		0.014881	0.01184	0.014881	0.008994																																					-53.948	-54.3064
			-62.6429	-63.735	-62.6429	-63.8236		0.014887	0.011846	0.014887	0.008994																																					-53.7089	-54.0653
			-62.6381	-63.7276	-62.6381	-63.821		0.014893	0.011852	0.014893	0.008994																																					-53.4716	-53.826
			-62.6318	-63.7186	-62.6318	-63.8169		0.0149	0.011859	0.0149	0.008994																																					-53.2368	-53.5892
			-62.6239	-63.7082	-62.6239	-63.8112		0.014906	0.011866	0.014906	0.008994																																					-53.005	-53.3555
			-62.6147	-63.6963	-62.6147	-63.8039		0.014913	0.011872	0.014913	0.008994																																					-52.777	-53.1256
			-62.604	-63.683	-62.604	-63.7952		0.014919	0.011879	0.014919	0.008994																																					-52.553	-52.8998
			-62.592	-63.6683	-62.592	-63.7851		0.014926	0.011886	0.014926	0.008993																																					-52.3335	-52.6785
			-62.5787	-63.6524	-62.5787	-63.7736		0.014933	0.011894	0.014933	0.008993																																					-52.1187	-52.462
			-62.5642	-63.6352	-62.5642	-63.7609		0.01494	0.011901	0.01494	0.008993																																					-51.9089	-52.2506
			-62.5486	-63.617	-62.5486	-63.747		0.014947	0.011908	0.014947	0.008993																																					-51.7043	-52.0444
			-62.5319	-63.5976	-62.5319	-63.7319		0.014954	0.011916	0.014954	0.008993																																					-51.5048	-51.8434
			-62.5142	-63.5773	-62.5142	-63.7158		0.014962	0.011923	0.014962	0.008993																																					-51.3107	-51.6479
			-62.4956	-63.556	-62.4956	-63.6987		0.014969	0.011931	0.014969	0.008993																																					-51.122	-51.4579
			-62.4761	-63.5339	-62.4761	-63.6808		0.014977	0.011939	0.014977	0.008993																																					-50.9386	-51.2733
			-62.4558	-63.511	-62.4558	-63.662		0.014984	0.011947	0.014984	0.008992																																					-50.7606	-51.0942
			-62.4348	-63.4874	-62.4348	-63.6424		0.014992	0.011955	0.014992	0.008992																																					-50.5879	-50.9205
			-62.4131	-63.4631	-62.4131	-63.6222		0.015	0.011963	0.015	0.008992																																					-50.4205	-50.7521
			-62.3908	-63.4382	-62.3908	-63.6013		0.015008	0.011971	0.015008	0.008992																																					-50.2584	-50.5891
			-62.368	-63.4128	-62.368	-63.5799		0.015016	0.011979	0.015016	0.008992																																					-50.1013	-50.4314
			-62.3446	-63.3869	-62.3446	-63.5579		0.015024	0.011988	0.015024	0.008992																																					-49.9493	-50.2787
			-62.3209	-63.3605	-62.3209	-63.5355		0.015032	0.011996	0.015032	0.008992																																					-49.8023	-50.1312
			-62.2967	-63.3338	-62.2967	-63.5128		0.01504	0.012004	0.01504	0.008992																																					-49.66	-49.9885
			-62.2722	-63.3068	-62.2722	-63.4896		0.015048	0.012013	0.015048	0.008992																																					-49.5225	-49.8507
			-62.2474	-63.2795	-62.2474	-63.4662		0.015057	0.012022	0.015057	0.008991																																					-49.3896	-49.7176
			-62.2224	-63.252	-62.2224	-63.4426		0.015065	0.01203	0.015065	0.008991																																					-49.2612	-49.5891
			-62.1971	-63.2243	-62.1971	-63.4187		0.015074	0.012039	0.015074	0.008991																																					-49.1372	-49.4651
			-62.1717	-63.1964	-62.1717	-63.3947		0.015082	0.012048	0.015082	0.008991																																					-49.0174	-49.3455
			-62.1462	-63.1684	-62.1462	-63.3706		0.015091	0.012057	0.015091	0.008991																																					-48.9017	-49.2301
			-62.1205	-63.1404	-62.1205	-63.3464		0.0151	0.012066	0.0151	0.008991																																					-48.7901	-49.1188
			-62.0948	-63.1123	-62.0948	-63.3222		0.015109	0.012075	0.015109	0.008991																																					-48.6823	-49.0115
			-62.069	-63.0842	-62.069	-63.2979		0.015117	0.012084	0.015117	0.008991																																					-48.5783	-48.9081
			-62.0432	-63.0561	-62.0432	-63.2737		0.015126	0.012093	0.015126	0.00899																																					-48.4779	-48.8085
			-62.0175	-63.028	-62.0175	-63.2495		0.015135	0.012103	0.015135	0.00899																																					-48.3811	-48.7125
			-61.9918	-63	-61.9918	-63.2254		0.015144	0.012112	0.015144	0.00899																																					-48.2877	-48.62
			-61.9661	-62.9721	-61.9661	-63.2014		0.015153	0.012121	0.015153	0.00899																																					-48.1976	-48.531
			-61.9405	-62.9443	-61.9405	-63.1775		0.015163	0.012131	0.015163	0.00899																																					-48.1107	-48.4453
			-61.9151	-62.9167	-61.9151	-63.1538		0.015172	0.01214	0.015172	0.00899																																					-48.0269	-48.3628
			-61.8897	-62.8892	-61.8897	-63.1302		0.015181	0.012149	0.015181	0.00899																																					-47.9461	-48.2834
			-61.8645	-62.8618	-61.8645	-63.1068		0.01519	0.012159	0.01519	0.00899																																					-47.8683	-48.207
			-61.8394	-62.8347	-61.8394	-63.0836		0.0152	0.012169	0.0152	0.008989																																					-47.7932	-48.1336
			-61.8145	-62.8077	-61.8145	-63.0606		0.015209	0.012178	0.015209	0.008989																																					-47.7209	-48.063
			-61.7898	-62.781	-61.7898	-63.0379		0.015218	0.012188	0.015218	0.008989																																					-47.6512	-47.9952
			-61.7653	-62.7545	-61.7653	-63.0154		0.015228	0.012198	0.015228	0.008989																																					-47.5841	-47.93
			-61.741	-62.7282	-61.741	-62.9931		0.015237	0.012207	0.015237	0.008989																																					-47.5195	-47.8674
			-61.7169	-62.7022	-61.7169	-62.9712		0.015247	0.012217	0.015247	0.008989																																					-47.4574	-47.8074
			-61.693	-62.6765	-61.693	-62.9495		0.015256	0.012227	0.015256	0.008989																																					-47.3975	-47.7497
			-61.6694	-62.651	-61.6694	-62.9281		0.015266	0.012237	0.015266	0.008989																																					-47.34	-47.6945
			-61.646	-62.6257	-61.646	-62.907		0.015275	0.012246	0.015275	0.008989																																					-47.2847	-47.6416
			-61.6229	-62.6008	-61.6229	-62.8862		0.015285	0.012256	0.015285	0.008988																																					-47.2316	-47.5909
			-61.6	-62.5762	-61.6	-62.8657		0.015295	0.012266	0.015295	0.008988																																					-47.1805	-47.5424
			-61.5773	-62.5518	-61.5773	-62.8455		0.015304	0.012276	0.015304	0.008988																																					-47.1315	-47.496
			-61.555	-62.5277	-61.555	-62.8256		0.015314	0.012286	0.015314	0.008988																																					-47.0845	-47.4517
			-61.5329	-62.504	-61.5329	-62.8061		0.015324	0.012296	0.015324	0.008988																																					-47.0395	-47.4094
			-61.511	-62.4805	-61.511	-62.7869		0.015334	0.012306	0.015334	0.008988																																					-46.9963	-47.369
			-61.4895	-62.4574	-61.4895	-62.7681		0.015343	0.012316	0.015343	0.008988																																					-46.955	-47.3306
			-61.4682	-62.4346	-61.4682	-62.7496		0.015353	0.012326	0.015353	0.008988																																					-46.9155	-47.294
			-61.4472	-62.4121	-61.4472	-62.7314		0.015363	0.012336	0.015363	0.008987																																					-46.8777	-47.2593
			-61.4265	-62.3899	-61.4265	-62.7136		0.015373	0.012346	0.015373	0.008987																																					-46.8416	-47.2263
			-61.4061	-62.368	-61.4061	-62.6961		0.015383	0.012357	0.015383	0.008987																																					-46.8072	-47.195
			-61.3859	-62.3464	-61.3859	-62.679		0.015393	0.012367	0.015393	0.008987																																					-46.7745	-47.1655
			-61.3661	-62.3252	-61.3661	-62.6622		0.015403	0.012377	0.015403	0.008987																																					-46.7433	-47.1375
			-61.3465	-62.3043	-61.3465	-62.6457		0.015413	0.012387	0.015413	0.008987																																					-46.7137	-47.1112
			-61.3272	-62.2837	-61.3272	-62.6296		0.015423	0.012397	0.015423	0.008987																																					-46.6856	-47.0864
			-61.3083	-62.2635	-61.3083	-62.6139		0.015433	0.012407	0.015433	0.008987																																					-46.659	-47.0632
			-61.2896	-62.2435	-61.2896	-62.5985		0.015443	0.012418	0.015443	0.008987																																					-46.6338	-47.0414
			-61.2712	-62.2239	-61.2712	-62.5835		0.015453	0.012428	0.015453	0.008986																																					-46.6101	-47.0211
			-61.2531	-62.2046	-61.2531	-62.5688		0.015463	0.012438	0.015463	0.008986																																					-46.5877	-47.0022
			-61.2353	-62.1856	-61.2353	-62.5544		0.015473	0.012448	0.015473	0.008986																																					-46.5667	-46.9848
			-61.2177	-62.167	-61.2177	-62.5404		0.015483	0.012459	0.015483	0.008986																																					-46.547	-46.9686
			-61.2005	-62.1487	-61.2005	-62.5268		0.015493	0.012469	0.015493	0.008986																																					-46.5287	-46.9538
			-61.1836	-62.1306	-61.1836	-62.5135		0.015503	0.012479	0.015503	0.008986																																					-46.5116	-46.9403
			-61.1669	-62.113	-61.1669	-62.5005		0.015513	0.012489	0.015513	0.008986																																					-46.4957	-46.9281
			-61.1505	-62.0956	-61.1505	-62.4879		0.015523	0.0125	0.015523	0.008986																																					-46.4811	-46.9171
			-61.1344	-62.0785	-61.1344	-62.4756		0.015533	0.01251	0.015533	0.008985																																					-46.4676	-46.9074
			-61.1186	-62.0617	-61.1186	-62.4636		0.015543	0.01252	0.015543	0.008985																																					-46.4554	-46.8988
			-61.1031	-62.0453	-61.1031	-62.452		0.015553	0.012531	0.015553	0.008985																																					-46.4443	-46.8913
			-61.0879	-62.0292	-61.0879	-62.4407		0.015563	0.012541	0.015563	0.008985																																					-46.4343	-46.8851
			-61.0729	-62.0133	-61.0729	-62.4297		0.015574	0.012551	0.015574	0.008985																																					-46.4254	-46.8799
			-61.0582	-61.9978	-61.0582	-62.4191		0.015584	0.012562	0.015584	0.008985																																					-46.4175	-46.8758
			-61.0438	-61.9826	-61.0438	-62.4087		0.015594	0.012572	0.015594	0.008985																																					-46.4108	-46.8728
			-61.0297	-61.9677	-61.0297	-62.3987		0.015604	0.012582	0.015604	0.008985																																					-46.4051	-46.8708
			-61.0158	-61.953	-61.0158	-62.389		0.015614	0.012592	0.015614	0.008985																																					-46.4004	-46.8698
			-61.0023	-61.9387	-61.0023	-62.3797		0.015624	0.012603	0.015624	0.008984																																					-46.3967	-46.8699
			-60.989	-61.9247	-60.989	-62.3706		0.015634	0.012613	0.015634	0.008984																																					-46.3939	-46.8709
			-60.9759	-61.9109	-60.9759	-62.3618		0.015644	0.012623	0.015644	0.008984																																					-46.3922	-46.8728
			-60.9631	-61.8975	-60.9631	-62.3534		0.015655	0.012634	0.015655	0.008984																																					-46.3913	-46.8757
			-60.9506	-61.8843	-60.9506	-62.3452		0.015665	0.012644	0.015665	0.008984																																					-46.3914	-46.8796
			-60.9384	-61.8714	-60.9384	-62.3374		0.015675	0.012654	0.015675	0.008984																																					-46.3924	-46.8843
			-60.9264	-61.8588	-60.9264	-62.3298		0.015685	0.012665	0.015685	0.008984																																					-46.3943	-46.8899
			-60.9147	-61.8465	-60.9147	-62.3226		0.015695	0.012675	0.015695	0.008984																																					-46.3971	-46.8963
			-60.9032	-61.8344	-60.9032	-62.3156		0.015705	0.012685	0.015705	0.008983																																					-46.4007	-46.9036
			-60.892	-61.8226	-60.892	-62.3089		0.015715	0.012695	0.015715	0.008983																																					-46.4051	-46.9117
			-60.881	-61.8111	-60.881	-62.3025		0.015725	0.012706	0.015725	0.008983																																					-46.4104	-46.9206
			-60.8703	-61.7999	-60.8703	-62.2964		0.015735	0.012716	0.015735	0.008983																																					-46.4165	-46.9303
			-60.8599	-61.7889	-60.8599	-62.2905		0.015746	0.012726	0.015746	0.008983																																					-46.4233	-46.9408
			-60.8497	-61.7782	-60.8497	-62.285		0.015756	0.012736	0.015756	0.008983																																					-46.431	-46.952
			-60.8397	-61.7677	-60.8397	-62.2797		0.015766	0.012747	0.015766	0.008983																																					-46.4394	-46.964
			-60.83	-61.7576	-60.83	-62.2746		0.015776	0.012757	0.015776	0.008983																																					-46.4485	-46.9767
			-60.8205	-61.7476	-60.8205	-62.2699		0.015786	0.012767	0.015786	0.008983																																					-46.4584	-46.9901
			-60.8113	-61.7379	-60.8113	-62.2654		0.015796	0.012777	0.015796	0.008982																																					-46.469	-47.0042
			-60.8023	-61.7285	-60.8023	-62.2611		0.015806	0.012788	0.015806	0.008982																																					-46.4803	-47.0189
			-60.7935	-61.7193	-60.7935	-62.2571		0.015816	0.012798	0.015816	0.008982																																					-46.4923	-47.0344
			-60.785	-61.7104	-60.785	-62.2534		0.015826	0.012808	0.015826	0.008982																																					-46.505	-47.0505
			-60.7767	-61.7017	-60.7767	-62.2499		0.015836	0.012818	0.015836	0.008982																																					-46.5184	-47.0672
			-60.7686	-61.6933	-60.7686	-62.2466		0.015846	0.012828	0.015846	0.008982																																					-46.5324	-47.0845
			-60.7608	-61.6851	-60.7608	-62.2436		0.015856	0.012838	0.015856	0.008982																																					-46.547	-47.1025
			-60.7532	-61.6771	-60.7532	-62.2409		0.015866	0.012849	0.015866	0.008982																																					-46.5623	-47.121
			-60.7458	-61.6693	-60.7458	-62.2384		0.015876	0.012859	0.015876	0.008981																																					-46.5782	-47.1401
			-60.7387	-61.6618	-60.7387	-62.2361		0.015886	0.012869	0.015886	0.008981																																					-46.5947	-47.1598
			-60.7317	-61.6546	-60.7317	-62.234		0.015896	0.012879	0.015896	0.008981																																					-46.6118	-47.1801
			-60.725	-61.6475	-60.725	-62.2322		0.015906	0.012889	0.015906	0.008981																																					-46.6295	-47.2009
			-60.7185	-61.6407	-60.7185	-62.2306		0.015916	0.012899	0.015916	0.008981																																					-46.6477	-47.2222
			-60.7122	-61.6341	-60.7122	-62.2292		0.015926	0.012909	0.015926	0.008981																																					-46.6665	-47.2441
			-60.7062	-61.6277	-60.7062	-62.228		0.015936	0.012919	0.015936	0.008981																																					-46.6859	-47.2665
			-60.7003	-61.6215	-60.7003	-62.2271		0.015946	0.012929	0.015946	0.008981																																					-46.7058	-47.2893
			-60.6947	-61.6156	-60.6947	-62.2263		0.015956	0.012939	0.015956	0.008981																																					-46.7262	-47.3127
			-60.6892	-61.6098	-60.6892	-62.2258		0.015965	0.012949	0.015965	0.00898																																					-46.7471	-47.3365
			-60.684	-61.6043	-60.684	-62.2255		0.015975	0.012959	0.015975	0.00898																																					-46.7686	-47.3608
			-60.679	-61.599	-60.679	-62.2254		0.015985	0.012969	0.015985	0.00898																																					-46.7905	-47.3856
			-60.6742	-61.5939	-60.6742	-62.2255		0.015995	0.012979	0.015995	0.00898																																					-46.8129	-47.4108
			-60.6695	-61.5889	-60.6695	-62.2258		0.016005	0.012989	0.016005	0.00898																																					-46.8358	-47.4364
			-60.6651	-61.5842	-60.6651	-62.2263		0.016015	0.012999	0.016015	0.00898																																					-46.8592	-47.4625
			-60.6609	-61.5797	-60.6609	-62.227		0.016024	0.013009	0.016024	0.00898																																					-46.8831	-47.4889
			-60.6569	-61.5754	-60.6569	-62.2278		0.016034	0.013019	0.016034	0.00898																																					-46.9074	-47.5158
			-60.6531	-61.5713	-60.6531	-62.2289		0.016044	0.013029	0.016044	0.00898																																					-46.9321	-47.5431
			-60.6494	-61.5673	-60.6494	-62.2302		0.016054	0.013039	0.016054	0.008979																																					-46.9572	-47.5708
			-60.646	-61.5636	-60.646	-62.2316		0.016063	0.013048	0.016063	0.008979																																					-46.9828	-47.5988
			-60.6427	-61.5601	-60.6427	-62.2332		0.016073	0.013058	0.016073	0.008979																																					-47.0088	-47.6272
			-60.6396	-61.5567	-60.6396	-62.235		0.016083	0.013068	0.016083	0.008979																																					-47.0352	-47.656
			-60.6368	-61.5535	-60.6368	-62.237		0.016092	0.013078	0.016092	0.008979																																					-47.062	-47.6852
			-60.6341	-61.5505	-60.6341	-62.2392		0.016102	0.013088	0.016102	0.008979																																					-47.0892	-47.7146
			-60.6315	-61.5477	-60.6315	-62.2415		0.016112	0.013097	0.016112	0.008979																																					-47.1168	-47.7444
			-60.6292	-61.5451	-60.6292	-62.244		0.016121	0.013107	0.016121	0.008979																																					-47.1447	-47.7746
			-60.6271	-61.5426	-60.6271	-62.2467		0.016131	0.013117	0.016131	0.008978																																					-47.1731	-47.805
			-60.6251	-61.5403	-60.6251	-62.2495		0.016141	0.013126	0.016141	0.008978																																					-47.2017	-47.8358
			-60.6233	-61.5382	-60.6233	-62.2525		0.01615	0.013136	0.01615	0.008978																																					-47.2307	-47.8669
			-60.6216	-61.5363	-60.6216	-62.2557		0.01616	0.013146	0.01616	0.008978																																					-47.2601	-47.8982
			-60.6202	-61.5345	-60.6202	-62.259		0.016169	0.013155	0.016169	0.008978																																					-47.2898	-47.9299
			-60.6189	-61.5329	-60.6189	-62.2625		0.016179	0.013165	0.016179	0.008978																																					-47.3198	-47.9618
			-60.6178	-61.5314	-60.6178	-62.2661		0.016188	0.013175	0.016188	0.008978																																					-47.3501	-47.994
			-60.6168	-61.5301	-60.6168	-62.2699		0.016198	0.013184	0.016198	0.008978																																					-47.3808	-48.0265
			-60.6161	-61.529	-60.6161	-62.2738		0.016207	0.013194	0.016207	0.008978																																					-47.4117	-48.0592
			-60.6154	-61.5281	-60.6154	-62.2779		0.016217	0.013203	0.016217	0.008977																																					-47.443	-48.0922
			-60.615	-61.5273	-60.615	-62.2821		0.016226	0.013213	0.016226	0.008977																																					-47.4745	-48.1255
			-60.6147	-61.5266	-60.6147	-62.2865		0.016235	0.013222	0.016235	0.008977																																					-47.5064	-48.1589
			-60.6146	-61.5261	-60.6146	-62.291		0.016245	0.013232	0.016245	0.008977																																					-47.5385	-48.1926
			-60.6146	-61.5257	-60.6146	-62.2956		0.016254	0.013241	0.016254	0.008977																																					-47.5709	-48.2266
			-60.6148	-61.5255	-60.6148	-62.3004		0.016263	0.013251	0.016263	0.008977																																					-47.6035	-48.2607
			-60.6151	-61.5255	-60.6151	-62.3054		0.016273	0.01326	0.016273	0.008977																																					-47.6364	-48.2951
			-60.6156	-61.5256	-60.6156	-62.3104		0.016282	0.01327	0.016282	0.008977																																					-47.6696	-48.3296
			-60.6162	-61.5258	-60.6162	-62.3156		0.016291	0.013279	0.016291	0.008976																																					-47.703	-48.3644
			-60.617	-61.5262	-60.617	-62.3209		0.016301	0.013288	0.016301	0.008976																																					-47.7366	-48.3994
			-60.618	-61.5267	-60.618	-62.3264		0.01631	0.013298	0.01631	0.008976																																					-47.7705	-48.4345
			-60.6191	-61.5274	-60.6191	-62.332		0.016319	0.013307	0.016319	0.008976																																					-47.8046	-48.4699
			-60.6203	-61.5282	-60.6203	-62.3377		0.016328	0.013316	0.016328	0.008976																																					-47.8389	-48.5054
			-60.6217	-61.5291	-60.6217	-62.3435		0.016337	0.013326	0.016337	0.008976																																					-47.8734	-48.5411
			-60.6232	-61.5302	-60.6232	-62.3494		0.016347	0.013335	0.016347	0.008976																																					-47.9082	-48.577
			-60.6248	-61.5314	-60.6248	-62.3555		0.016356	0.013344	0.016356	0.008976																																					-47.9431	-48.613
			-60.6266	-61.5327	-60.6266	-62.3617		0.016365	0.013353	0.016365	0.008976																																					-47.9783	-48.6492
			-60.6286	-61.5342	-60.6286	-62.368		0.016374	0.013363	0.016374	0.008975																																					-48.0136	-48.6855
			-60.6307	-61.5358	-60.6307	-62.3744		0.016383	0.013372	0.016383	0.008975																																					-48.0492	-48.722
			-60.6329	-61.5375	-60.6329	-62.3809		0.016392	0.013381	0.016392	0.008975																																					-48.0849	-48.7586
			-60.6352	-61.5393	-60.6352	-62.3875		0.016401	0.01339	0.016401	0.008975																																					-48.1208	-48.7953
			-60.6377	-61.5413	-60.6377	-62.3943		0.01641	0.013399	0.01641	0.008975																																					-48.1568	-48.8322
			-60.6403	-61.5434	-60.6403	-62.4011		0.016419	0.013408	0.016419	0.008975																																					-48.1931	-48.8692
			-60.643	-61.5456	-60.643	-62.4081		0.016428	0.013417	0.016428	0.008975																																					-48.2295	-48.9064
			-60.6459	-61.5479	-60.6459	-62.4151		0.016437	0.013426	0.016437	0.008975																																					-48.266	-48.9436
			-60.6489	-61.5503	-60.6489	-62.4223		0.016446	0.013435	0.016446	0.008975																																					-48.3027	-48.981
			-60.652	-61.5529	-60.652	-62.4296		0.016455	0.013444	0.016455	0.008974																																					-48.3396	-49.0185
			-60.6552	-61.5555	-60.6552	-62.4369		0.016464	0.013453	0.016464	0.008974																																					-48.3766	-49.0561
			-60.6586	-61.5583	-60.6586	-62.4444		0.016473	0.013462	0.016473	0.008974																																					-48.4137	-49.0938
			-60.6621	-61.5612	-60.6621	-62.4519		0.016481	0.013471	0.016481	0.008974																																					-48.451	-49.1315
			-60.6657	-61.5642	-60.6657	-62.4596		0.01649	0.01348	0.01649	0.008974																																					-48.4884	-49.1694
			-60.6694	-61.5673	-60.6694	-62.4673		0.016499	0.013489	0.016499	0.008974																																					-48.5259	-49.2074
			-60.6732	-61.5705	-60.6732	-62.4752		0.016508	0.013498	0.016508	0.008974																																					-48.5636	-49.2454
			-60.6772	-61.5738	-60.6772	-62.4831		0.016517	0.013507	0.016517	0.008974																																					-48.6013	-49.2835
			-60.6812	-61.5773	-60.6812	-62.4911		0.016525	0.013516	0.016525	0.008973																																					-48.6392	-49.3217
			-60.6854	-61.5808	-60.6854	-62.4992		0.016534	0.013525	0.016534	0.008973																																					-48.6772	-49.36
			-60.6897	-61.5844	-60.6897	-62.5074		0.016543	0.013533	0.016543	0.008973																																					-48.7153	-49.3983
			-60.6941	-61.5881	-60.6941	-62.5157		0.016551	0.013542	0.016551	0.008973																																					-48.7535	-49.4367
			-60.6986	-61.592	-60.6986	-62.524		0.01656	0.013551	0.01656	0.008973																																					-48.7918	-49.4752
			-60.7032	-61.5959	-60.7032	-62.5325		0.016569	0.01356	0.016569	0.008973																																					-48.8301	-49.5137
			-60.7079	-61.5999	-60.7079	-62.541		0.016577	0.013568	0.016577	0.008973																																					-48.8686	-49.5523
			-60.7128	-61.604	-60.7128	-62.5496		0.016586	0.013577	0.016586	0.008973																																					-48.9071	-49.5909
			-60.7177	-61.6082	-60.7177	-62.5583		0.016595	0.013586	0.016595	0.008973																																					-48.9458	-49.6296
			-60.7227	-61.6125	-60.7227	-62.567		0.016603	0.013595	0.016603	0.008972																																					-48.9845	-49.6683
			-60.7278	-61.6169	-60.7278	-62.5759		0.016612	0.013603	0.016612	0.008972																																					-49.0233	-49.7071
			-60.7331	-61.6214	-60.7331	-62.5848		0.01662	0.013612	0.01662	0.008972																																					-49.0621	-49.7459
			-60.7384	-61.6259	-60.7384	-62.5937		0.016629	0.01362	0.016629	0.008972																																					-49.101	-49.7847
			-60.7438	-61.6306	-60.7438	-62.6028		0.016637	0.013629	0.016637	0.008972																																					-49.14	-49.8236
			-60.7493	-61.6353	-60.7493	-62.6119		0.016645	0.013637	0.016645	0.008972																																					-49.179	-49.8625
			-60.7549	-61.6401	-60.7549	-62.6211		0.016654	0.013646	0.016654	0.008972																																					-49.2181	-49.9014
			-60.7606	-61.645	-60.7606	-62.6303		0.016662	0.013655	0.016662	0.008972																																					-49.2573	-49.9404
			-60.7664	-61.65	-60.7664	-62.6397		0.016671	0.013663	0.016671	0.008972																																					-49.2965	-49.9794
			-60.7723	-61.6551	-60.7723	-62.6491		0.016679	0.013671	0.016679	0.008971																																					-49.3357	-50.0183
			-60.7783	-61.6602	-60.7783	-62.6585		0.016687	0.01368	0.016687	0.008971																																					-49.375	-50.0573
			-60.7844	-61.6654	-60.7844	-62.668		0.016696	0.013688	0.016696	0.008971																																					-49.4143	-50.0964
			-60.7905	-61.6707	-60.7905	-62.6776		0.016704	0.013697	0.016704	0.008971																																					-49.4537	-50.1354
			-60.7967	-61.6761	-60.7967	-62.6873		0.016712	0.013705	0.016712	0.008971																																					-49.4931	-50.1744
			-60.8031	-61.6816	-60.8031	-62.697		0.01672	0.013714	0.01672	0.008971																																					-49.5325	-50.2134
			-60.8095	-61.6871	-60.8095	-62.7067		0.016729	0.013722	0.016729	0.008971																																					-49.5719	-50.2525
			-60.8159	-61.6927	-60.8159	-62.7165		0.016737	0.01373	0.016737	0.008971																																					-49.6114	-50.2915
			-60.8225	-61.6984	-60.8225	-62.7264		0.016745	0.013739	0.016745	0.00897																																					-49.6509	-50.3306
			-60.8292	-61.7041	-60.8292	-62.7363		0.016753	0.013747	0.016753	0.00897																																					-49.6904	-50.3696
			-60.8359	-61.7099	-60.8359	-62.7463		0.016761	0.013755	0.016761	0.00897																																					-49.73	-50.4086
			-60.8427	-61.7158	-60.8427	-62.7564		0.01677	0.013763	0.01677	0.00897																																					-49.7695	-50.4476
			-60.8496	-61.7217	-60.8496	-62.7665		0.016778	0.013772	0.016778	0.00897																																					-49.8091	-50.4866
			-60.8565	-61.7277	-60.8565	-62.7766		0.016786	0.01378	0.016786	0.00897																																					-49.8487	-50.5256
			-60.8635	-61.7338	-60.8635	-62.7868		0.016794	0.013788	0.016794	0.00897																																					-49.8882	-50.5646
			-60.8706	-61.74	-60.8706	-62.797		0.016802	0.013796	0.016802	0.00897																																					-49.9278	-50.6035
			-60.8778	-61.7462	-60.8778	-62.8073		0.01681	0.013804	0.01681	0.00897																																					-49.9674	-50.6425
			-60.8851	-61.7525	-60.8851	-62.8177		0.016818	0.013812	0.016818	0.008969																																					-50.007	-50.6814
			-60.8924	-61.7588	-60.8924	-62.8281		0.016826	0.01382	0.016826	0.008969																																					-50.0466	-50.7203
			-60.8997	-61.7652	-60.8997	-62.8385		0.016834	0.013829	0.016834	0.008969																																					-50.0861	-50.7591
			-60.9072	-61.7716	-60.9072	-62.849		0.016842	0.013837	0.016842	0.008969																																					-50.1257	-50.798
			-60.9147	-61.7781	-60.9147	-62.8595		0.01685	0.013845	0.01685	0.008969																																					-50.1653	-50.8368
			-60.9223	-61.7847	-60.9223	-62.8701		0.016858	0.013853	0.016858	0.008969																																					-50.2048	-50.8756
			-60.9299	-61.7913	-60.9299	-62.8807		0.016865	0.013861	0.016865	0.008969																																					-50.2443	-50.9143
			-60.9376	-61.798	-60.9376	-62.8913		0.016873	0.013869	0.016873	0.008969																																					-50.2839	-50.953
			-60.9454	-61.8048	-60.9454	-62.902		0.016881	0.013877	0.016881	0.008969																																					-50.3234	-50.9917
			-60.9532	-61.8115	-60.9532	-62.9128		0.016889	0.013885	0.016889	0.008968																																					-50.3628	-51.0303
			-60.9611	-61.8184	-60.9611	-62.9235		0.016897	0.013893	0.016897	0.008968																																					-50.4023	-51.0689
			-60.9691	-61.8253	-60.9691	-62.9343		0.016904	0.0139	0.016904	0.008968																																					-50.4417	-51.1075
			-60.9771	-61.8322	-60.9771	-62.9452		0.016912	0.013908	0.016912	0.008968																																					-50.4811	-51.146
			-60.9852	-61.8392	-60.9852	-62.9561		0.01692	0.013916	0.01692	0.008968																																					-50.5205	-51.1845
			-60.9933	-61.8463	-60.9933	-62.967		0.016928	0.013924	0.016928	0.008968																																					-50.5599	-51.2229
			-61.0015	-61.8534	-61.0015	-62.978		0.016935	0.013932	0.016935	0.008968																																					-50.5992	-51.2613
			-61.0097	-61.8605	-61.0097	-62.9889		0.016943	0.01394	0.016943	0.008968																																					-50.6385	-51.2996
			-61.018	-61.8677	-61.018	-63		0.016951	0.013948	0.016951	0.008967																																					-50.6777	-51.3379
			-61.0263	-61.875	-61.0263	-63.011		0.016958	0.013955	0.016958	0.008967																																					-50.7169	-51.3761
			-61.0347	-61.8823	-61.0347	-63.0221		0.016966	0.013963	0.016966	0.008967																																					-50.7561	-51.4143
			-61.0432	-61.8896	-61.0432	-63.0332		0.016974	0.013971	0.016974	0.008967																																					-50.7952	-51.4524
			-61.0517	-61.897	-61.0517	-63.0444		0.016981	0.013978	0.016981	0.008967																																					-50.8343	-51.4905
			-61.0602	-61.9044	-61.0602	-63.0556		0.016989	0.013986	0.016989	0.008967																																					-50.8734	-51.5285
			-61.0688	-61.9118	-61.0688	-63.0668		0.016996	0.013994	0.016996	0.008967																																					-50.9124	-51.5665
			-61.0775	-61.9194	-61.0775	-63.078		0.017004	0.014002	0.017004	0.008967																																					-50.9514	-51.6044
			-61.0862	-61.9269	-61.0862	-63.0893		0.017011	0.014009	0.017011	0.008967																																					-50.9903	-51.6422
			-61.0949	-61.9345	-61.0949	-63.1006		0.017019	0.014017	0.017019	0.008966																																					-51.0292	-51.68
			-61.1037	-61.9421	-61.1037	-63.1119		0.017026	0.014024	0.017026	0.008966																																					-51.068	-51.7177
			-61.1125	-61.9498	-61.1125	-63.1232		0.017034	0.014032	0.017034	0.008966																																					-51.1067	-51.7554
			-61.1214	-61.9575	-61.1214	-63.1346		0.017041	0.01404	0.017041	0.008966																																					-51.1455	-51.793
			-61.1303	-61.9652	-61.1303	-63.146		0.017048	0.014047	0.017048	0.008966																																					-51.1841	-51.8305
			-61.1392	-61.973	-61.1392	-63.1574		0.017056	0.014055	0.017056	0.008966																																					-51.2227	-51.868
			-61.1482	-61.9808	-61.1482	-63.1688		0.017063	0.014062	0.017063	0.008966																																					-51.2613	-51.9054
			-61.1573	-61.9887	-61.1573	-63.1803		0.01707	0.01407	0.01707	0.008966																																					-51.2998	-51.9427
			-61.1663	-61.9965	-61.1663	-63.1918		0.017078	0.014077	0.017078	0.008966																																					-51.3382	-51.98
			-61.1755	-62.0045	-61.1755	-63.2033		0.017085	0.014085	0.017085	0.008965																																					-51.3766	-52.0172
			-61.1846	-62.0124	-61.1846	-63.2148		0.017092	0.014092	0.017092	0.008965																																					-51.4149	-52.0543
			-61.1938	-62.0204	-61.1938	-63.2263		0.0171	0.014099	0.0171	0.008965																																					-51.4532	-52.0913
			-61.203	-62.0284	-61.203	-63.2379		0.017107	0.014107	0.017107	0.008965																																					-51.4914	-52.1283
			-61.2123	-62.0365	-61.2123	-63.2495		0.017114	0.014114	0.017114	0.008965																																					-51.5295	-52.1652
			-61.2216	-62.0445	-61.2216	-63.2611		0.017121	0.014122	0.017121	0.008965																																					-51.5676	-52.2021
			-61.2309	-62.0527	-61.2309	-63.2727		0.017129	0.014129	0.017129	0.008965																																					-51.6056	-52.2389
			-61.2403	-62.0608	-61.2403	-63.2843		0.017136	0.014136	0.017136	0.008965																																					-51.6435	-52.2756
			-61.2497	-62.069	-61.2497	-63.296		0.017143	0.014144	0.017143	0.008965																																					-51.6814	-52.3122
			-61.2591	-62.0772	-61.2591	-63.3077		0.01715	0.014151	0.01715	0.008964																																					-51.7192	-52.3487
			-61.2686	-62.0854	-61.2686	-63.3193		0.017157	0.014158	0.017157	0.008964																																					-51.7569	-52.3852
			-61.278	-62.0936	-61.278	-63.331		0.017164	0.014165	0.017164	0.008964																																					-51.7946	-52.4216
			-61.2876	-62.1019	-61.2876	-63.3427		0.017171	0.014173	0.017171	0.008964																																					-51.8322	-52.4579
			-61.2971	-62.1102	-61.2971	-63.3545		0.017178	0.01418	0.017178	0.008964																																					-51.8697	-52.4941
			-61.3067	-62.1186	-61.3067	-63.3662		0.017185	0.014187	0.017185	0.008964																																					-51.9071	-52.5303
			-61.3163	-62.1269	-61.3163	-63.378		0.017192	0.014194	0.017192	0.008964																																					-51.9445	-52.5664
			-61.3259	-62.1353	-61.3259	-63.3897		0.017199	0.014202	0.017199	0.008964																																					-51.9818	-52.6024
			-61.3356	-62.1437	-61.3356	-63.4015		0.017206	0.014209	0.017206	0.008963																																					-52.0191	-52.6383
			-61.3453	-62.1521	-61.3453	-63.4133		0.017213	0.014216	0.017213	0.008963																																					-52.0562	-52.6742
			-61.355	-62.1606	-61.355	-63.4251		0.01722	0.014223	0.01722	0.008963																																					-52.0933	-52.7099
			-61.3648	-62.169	-61.3648	-63.4369		0.017227	0.01423	0.017227	0.008963																																					-52.1303	-52.7456
			-61.3745	-62.1775	-61.3745	-63.4487		0.017234	0.014237	0.017234	0.008963																																					-52.1672	-52.7812
			-61.3843	-62.1861	-61.3843	-63.4605		0.017241	0.014244	0.017241	0.008963																																					-52.2041	-52.8167
			-61.3941	-62.1946	-61.3941	-63.4724		0.017248	0.014251	0.017248	0.008963																																					-52.2408	-52.8521
			-61.404	-62.2032	-61.404	-63.4842		0.017255	0.014258	0.017255	0.008963																																					-52.2775	-52.8875
			-61.4138	-62.2117	-61.4138	-63.4961		0.017262	0.014265	0.017262	0.008963																																					-52.3141	-52.9228
			-61.4237	-62.2203	-61.4237	-63.5079		0.017269	0.014272	0.017269	0.008962																																					-52.3507	-52.9579
			-61.4336	-62.2289	-61.4336	-63.5198		0.017275	0.014279	0.017275	0.008962																																					-52.3871	-52.993
			-61.4435	-62.2376	-61.4435	-63.5317		0.017282	0.014286	0.017282	0.008962																																					-52.4235	-53.0281
			-61.4535	-62.2462	-61.4535	-63.5435		0.017289	0.014293	0.017289	0.008962																																					-52.4598	-53.063
			-61.4634	-62.2549	-61.4634	-63.5554		0.017296	0.0143	0.017296	0.008962																																					-52.496	-53.0978
			-61.4734	-62.2636	-61.4734	-63.5673		0.017303	0.014307	0.017303	0.008962																																					-52.5321	-53.1326
			-61.4834	-62.2723	-61.4834	-63.5792		0.017309	0.014314	0.017309	0.008962																																					-52.5681	-53.1673
			-61.4934	-62.281	-61.4934	-63.5911		0.017316	0.014321	0.017316	0.008962																																					-52.6041	-53.2019
			-61.5034	-62.2897	-61.5034	-63.603		0.017323	0.014328	0.017323	0.008962																																					-52.64	-53.2364
			-61.5135	-62.2985	-61.5135	-63.6149		0.017329	0.014335	0.017329	0.008961																																					-52.6758	-53.2708
			-61.5236	-62.3073	-61.5236	-63.6268		0.017336	0.014342	0.017336	0.008961																																					-52.7115	-53.3051
			-61.5336	-62.316	-61.5336	-63.6387		0.017343	0.014348	0.017343	0.008961																																					-52.7471	-53.3393
			-61.5437	-62.3248	-61.5437	-63.6507		0.017349	0.014355	0.017349	0.008961																																					-52.7826	-53.3735
			-61.5539	-62.3336	-61.5539	-63.6626		0.017356	0.014362	0.017356	0.008961																																					-52.8181	-53.4076
			-61.564	-62.3425	-61.564	-63.6745		0.017363	0.014369	0.017363	0.008961																																					-52.8534	-53.4415
			-61.5741	-62.3513	-61.5741	-63.6864		0.017369	0.014376	0.017369	0.008961																																					-52.8887	-53.4754
			-61.5843	-62.3601	-61.5843	-63.6983		0.017376	0.014382	0.017376	0.008961																																					-52.9239	-53.5092
			-61.5945	-62.369	-61.5945	-63.7103		0.017382	0.014389	0.017382	0.008961																																					-52.959	-53.5429
			-61.6046	-62.3779	-61.6046	-63.7222		0.017389	0.014396	0.017389	0.00896																																					-52.994	-53.5766
			-61.6148	-62.3867	-61.6148	-63.7341		0.017395	0.014403	0.017395	0.00896																																					-53.029	-53.6101
			-61.625	-62.3956	-61.625	-63.7461		0.017402	0.014409	0.017402	0.00896																																					-53.0638	-53.6435
			-61.6352	-62.4045	-61.6352	-63.758		0.017408	0.014416	0.017408	0.00896																																					-53.0986	-53.6769
			-61.6455	-62.4135	-61.6455	-63.7699		0.017415	0.014423	0.017415	0.00896																																					-53.1332	-53.7102
			-61.6557	-62.4224	-61.6557	-63.7818		0.017421	0.014429	0.017421	0.00896																																					-53.1678	-53.7434
			-61.666	-62.4313	-61.666	-63.7938		0.017428	0.014436	0.017428	0.00896																																					-53.2023	-53.7764
			-61.6762	-62.4402	-61.6762	-63.8057		0.017434	0.014443	0.017434	0.00896																																					-53.2367	-53.8094
			-61.6865	-62.4492	-61.6865	-63.8176		0.01744	0.014449	0.01744	0.008959																																					-53.271	-53.8424
			-61.6968	-62.4581	-61.6968	-63.8295		0.017447	0.014456	0.017447	0.008959																																					-53.3052	-53.8752
			-61.707	-62.4671	-61.707	-63.8414		0.017453	0.014462	0.017453	0.008959																																					-53.3394	-53.9079
			-61.7173	-62.4761	-61.7173	-63.8533		0.01746	0.014469	0.01746	0.008959																																					-53.3734	-53.9405
			-61.7276	-62.4851	-61.7276	-63.8652		0.017466	0.014475	0.017466	0.008959																																					-53.4074	-53.9731
			-61.7379	-62.4941	-61.7379	-63.8771		0.017472	0.014482	0.017472	0.008959																																					-53.4413	-54.0056
			-61.7483	-62.503	-61.7483	-63.889		0.017479	0.014488	0.017479	0.008959																																					-53.475	-54.0379
			-61.7586	-62.512	-61.7586	-63.9009		0.017485	0.014495	0.017485	0.008959																																					-53.5087	-54.0702
			-61.7689	-62.5211	-61.7689	-63.9128		0.017491	0.014501	0.017491	0.008959																																					-53.5423	-54.1024
			-61.7792	-62.5301	-61.7792	-63.9247		0.017497	0.014508	0.017497	0.008958																																					-53.5758	-54.1345
			-61.7896	-62.5391	-61.7896	-63.9366		0.017504	0.014514	0.017504	0.008958																																					-53.6092	-54.1665
			-61.7999	-62.5481	-61.7999	-63.9485		0.01751	0.014521	0.01751	0.008958																																					-53.6426	-54.1984
			-61.8103	-62.5571	-61.8103	-63.9604		0.017516	0.014527	0.017516	0.008958																																					-53.6758	-54.2303
			-61.8206	-62.5662	-61.8206	-63.9722		0.017522	0.014534	0.017522	0.008958																																					-53.709	-54.262
			-61.831	-62.5752	-61.831	-63.9841		0.017529	0.01454	0.017529	0.008958																																					-53.742	-54.2937
			-61.8413	-62.5842	-61.8413	-63.9959		0.017535	0.014546	0.017535	0.008958																																					-53.775	-54.3252
			-61.8517	-62.5933	-61.8517	-64.0078		0.017541	0.014553	0.017541	0.008958																																					-53.8079	-54.3567
			-61.8621	-62.6023	-61.8621	-64.0196		0.017547	0.014559	0.017547	0.008958																																					-53.8406	-54.3881
			-61.8724	-62.6114	-61.8724	-64.0315		0.017553	0.014566	0.017553	0.008957																																					-53.8733	-54.4194
			-61.8828	-62.6204	-61.8828	-64.0433		0.017559	0.014572	0.017559	0.008957																																					-53.9059	-54.4506
			-61.8932	-62.6295	-61.8932	-64.0551		0.017565	0.014578	0.017565	0.008957																																					-53.9385	-54.4817
			-61.9036	-62.6385	-61.9036	-64.0669		0.017571	0.014585	0.017571	0.008957																																					-53.9709	-54.5127
			-61.9139	-62.6476	-61.9139	-64.0787		0.017578	0.014591	0.017578	0.008957																																					-54.0032	-54.5436
			-61.9243	-62.6567	-61.9243	-64.0905		0.017584	0.014597	0.017584	0.008957																																					-54.0354	-54.5745
			-61.9347	-62.6657	-61.9347	-64.1023		0.01759	0.014603	0.01759	0.008957																																					-54.0676	-54.6052
			-61.9451	-62.6748	-61.9451	-64.1141		0.017596	0.01461	0.017596	0.008957																																					-54.0997	-54.6359
			-61.9555	-62.6838	-61.9555	-64.1259		0.017602	0.014616	0.017602	0.008957																																					-54.1316	-54.6664
			-61.9659	-62.6929	-61.9659	-64.1377		0.017608	0.014622	0.017608	0.008956																																					-54.1635	-54.6969
			-61.9762	-62.702	-61.9762	-64.1494		0.017614	0.014628	0.017614	0.008956																																					-54.1953	-54.7273
			-61.9866	-62.7111	-61.9866	-64.1612		0.01762	0.014634	0.01762	0.008956																																					-54.227	-54.7576
			-61.997	-62.7201	-61.997	-64.1729		0.017626	0.014641	0.017626	0.008956																																					-54.2586	-54.7878
			-62.0074	-62.7292	-62.0074	-64.1846		0.017632	0.014647	0.017632	0.008956																																					-54.2901	-54.818
			-62.0178	-62.7383	-62.0178	-64.1963		0.017638	0.014653	0.017638	0.008956																																					-54.3215	-54.848
			-62.0281	-62.7473	-62.0281	-64.208		0.017643	0.014659	0.017643	0.008956																																					-54.3529	-54.8779
			-62.0385	-62.7564	-62.0385	-64.2197		0.017649	0.014665	0.017649	0.008956																																					-54.3841	-54.9078
			-62.0489	-62.7654	-62.0489	-64.2314		0.017655	0.014671	0.017655	0.008956																																					-54.4153	-54.9376
			-62.0593	-62.7745	-62.0593	-64.2431		0.017661	0.014677	0.017661	0.008955																																					-54.4463	-54.9672
			-62.0696	-62.7836	-62.0696	-64.2548		0.017667	0.014684	0.017667	0.008955																																					-54.4773	-54.9968
			-62.08	-62.7926	-62.08	-64.2664		0.017673	0.01469	0.017673	0.008955																																					-54.5082	-55.0263
			-62.0904	-62.8017	-62.0904	-64.2781		0.017679	0.014696	0.017679	0.008955																																					-54.539	-55.0557
			-62.1007	-62.8108	-62.1007	-64.2897		0.017685	0.014702	0.017685	0.008955																																					-54.5697	-55.0851
			-62.1111	-62.8198	-62.1111	-64.3013		0.01769	0.014708	0.01769	0.008955																																					-54.6003	-55.1143
			-62.1215	-62.8289	-62.1215	-64.313		0.017696	0.014714	0.017696	0.008955																																					-54.6308	-55.1435
			-62.1318	-62.8379	-62.1318	-64.3246		0.017702	0.01472	0.017702	0.008955																																					-54.6613	-55.1725
			-62.1422	-62.847	-62.1422	-64.3361		0.017708	0.014726	0.017708	0.008955																																					-54.6916	-55.2015
			-62.1525	-62.856	-62.1525	-64.3477		0.017713	0.014732	0.017713	0.008954																																					-54.7219	-55.2304
			-62.1628	-62.865	-62.1628	-64.3593		0.017719	0.014738	0.017719	0.008954																																					-54.752	-55.2592
			-62.1732	-62.8741	-62.1732	-64.3708		0.017725	0.014744	0.017725	0.008954																																					-54.7821	-55.2879
			-62.1835	-62.8831	-62.1835	-64.3824		0.017731	0.01475	0.017731	0.008954																																					-54.8121	-55.3165
			-62.1938	-62.8921	-62.1938	-64.3939		0.017736	0.014756	0.017736	0.008954																																					-54.842	-55.3451
			-62.2042	-62.9012	-62.2042	-64.4054		0.017742	0.014762	0.017742	0.008954																																					-54.8718	-55.3735
			-62.2145	-62.9102	-62.2145	-64.4169		0.017748	0.014767	0.017748	0.008954																																					-54.9016	-55.4019
			-62.2248	-62.9192	-62.2248	-64.4284		0.017753	0.014773	0.017753	0.008954																																					-54.9312	-55.4302
			-62.2351	-62.9282	-62.2351	-64.4399		0.017759	0.014779	0.017759	0.008953																																					-54.9607	-55.4583
			-62.2454	-62.9372	-62.2454	-64.4513		0.017765	0.014785	0.017765	0.008953																																					-54.9902	-55.4865
			-62.2557	-62.9462	-62.2557	-64.4628		0.01777	0.014791	0.01777	0.008953																																					-55.0196	-55.5145
			-62.266	-62.9552	-62.266	-64.4742		0.017776	0.014797	0.017776	0.008953																																					-55.0488	-55.5424
			-62.2763	-62.9642	-62.2763	-64.4857		0.017782	0.014803	0.017782	0.008953																																					-55.078	-55.5703
			-62.2865	-62.9732	-62.2865	-64.4971		0.017787	0.014808	0.017787	0.008953																																					-55.1071	-55.598
			-62.2968	-62.9822	-62.2968	-64.5085		0.017793	0.014814	0.017793	0.008953																																					-55.1362	-55.6257
			-62.3071	-62.9912	-62.3071	-64.5198		0.017798	0.01482	0.017798	0.008953																																					-55.1651	-55.6533
			-62.3173	-63.0002	-62.3173	-64.5312		0.017804	0.014826	0.017804	0.008953																																					-55.1939	-55.6808
			-62.3276	-63.0091	-62.3276	-64.5426		0.017809	0.014832	0.017809	0.008952																																					-55.2227	-55.7082
			-62.3378	-63.0181	-62.3378	-64.5539		0.017815	0.014837	0.017815	0.008952																																					-55.2514	-55.7356
			-62.348	-63.0271	-62.348	-64.5652		0.01782	0.014843	0.01782	0.008952																																					-55.28	-55.7628
			-62.3583	-63.036	-62.3583	-64.5765		0.017826	0.014849	0.017826	0.008952																																					-55.3085	-55.79
			-62.3685	-63.0449	-62.3685	-64.5878		0.017831	0.014855	0.017831	0.008952																																					-55.3369	-55.8171
			-62.3787	-63.0539	-62.3787	-64.5991		0.017837	0.01486	0.017837	0.008952																																					-55.3652	-55.8441
			-62.3889	-63.0628	-62.3889	-64.6104		0.017842	0.014866	0.017842	0.008952																																					-55.3935	-55.871
			-62.3991	-63.0717	-62.3991	-64.6216		0.017848	0.014872	0.017848	0.008952																																					-55.4216	-55.8978
			-62.4093	-63.0807	-62.4093	-64.6329		0.017853	0.014877	0.017853	0.008952																																					-55.4497	-55.9246
			-62.4194	-63.0896	-62.4194	-64.6441		0.017859	0.014883	0.017859	0.008951																																					-55.4777	-55.9513
			-62.4296	-63.0985	-62.4296	-64.6553		0.017864	0.014889	0.017864	0.008951																																					-55.5056	-55.9779
			-62.4398	-63.1074	-62.4398	-64.6665		0.01787	0.014894	0.01787	0.008951																																					-55.5334	-56.0044
			-62.4499	-63.1163	-62.4499	-64.6777		0.017875	0.0149	0.017875	0.008951																																					-55.5611	-56.0308
			-62.4601	-63.1251	-62.4601	-64.6888		0.01788	0.014906	0.01788	0.008951																																					-55.5888	-56.0571
			-62.4702	-63.134	-62.4702	-64.7		0.017886	0.014911	0.017886	0.008951																																					-55.6163	-56.0834
			-62.4803	-63.1429	-62.4803	-64.7111		0.017891	0.014917	0.017891	0.008951																																					-55.6438	-56.1096
			-62.4904	-63.1517	-62.4904	-64.7222		0.017896	0.014923	0.017896	0.008951																																					-55.6712	-56.1357
			-62.5005	-63.1606	-62.5005	-64.7333		0.017902	0.014928	0.017902	0.008951																																					-55.6985	-56.1617
			-62.5106	-63.1694	-62.5106	-64.7444		0.017907	0.014934	0.017907	0.00895																																					-55.7257	-56.1876
			-62.5207	-63.1783	-62.5207	-64.7555		0.017912	0.014939	0.017912	0.00895																																					-55.7529	-56.2135
			-62.5308	-63.1871	-62.5308	-64.7665		0.017918	0.014945	0.017918	0.00895																																					-55.7799	-56.2392
			-62.5408	-63.1959	-62.5408	-64.7776		0.017923	0.01495	0.017923	0.00895																																					-55.8069	-56.2649
			-62.5509	-63.2047	-62.5509	-64.7886		0.017928	0.014956	0.017928	0.00895																																					-55.8338	-56.2906
			-62.5609	-63.2135	-62.5609	-64.7996		0.017933	0.014961	0.017933	0.00895																																					-55.8606	-56.3161
			-62.571	-63.2223	-62.571	-64.8106		0.017939	0.014967	0.017939	0.00895																																					-55.8873	-56.3415
			-62.581	-63.2311	-62.581	-64.8216		0.017944	0.014972	0.017944	0.00895																																					-55.8676	-56.3202
			-62.5909	-63.2398	-62.5909	-64.8325		0.017949	0.014978	0.017949	0.00895																																					-55.8083	-56.2589
			-62.6007	-63.2484	-62.6007	-64.8432		0.017955	0.014984	0.017955	0.008949																																					-55.7145	-56.1629
			-62.6103	-63.2567	-62.6103	-64.8536		0.01796	0.014989	0.01796	0.008949																																					-55.591	-56.037
			-62.6194	-63.2646	-62.6194	-64.8637		0.017966	0.014995	0.017966	0.008949																																					-55.4422	-55.8855
			-62.628	-63.2719	-62.628	-64.873		0.017971	0.015001	0.017971	0.008949																																					-55.2723	-55.7128
			-62.6358	-63.2785	-62.6358	-64.8816		0.017977	0.015007	0.017977	0.008949																																					-55.0848	-55.5224
			-62.6426	-63.2841	-62.6426	-64.8891		0.017983	0.015014	0.017983	0.008949																																					-54.8831	-55.3177
			-62.6484	-63.2886	-62.6484	-64.8955		0.017989	0.01502	0.017989	0.008949																																					-54.67	-55.1016
			-62.653	-63.2919	-62.653	-64.9006		0.017995	0.015026	0.017995	0.008949																																					-54.4482	-54.8767
			-62.6562	-63.2938	-62.6562	-64.9042		0.018002	0.015033	0.018002	0.008949																																					-54.2198	-54.6451
			-62.658	-63.2943	-62.658	-64.9063		0.018008	0.01504	0.018008	0.008948																																					-53.9868	-54.409
			-62.6583	-63.2933	-62.6583	-64.9068		0.018015	0.015047	0.018015	0.008948																																					-53.7508	-54.1699
			-62.6571	-63.2908	-62.6571	-64.9057		0.018021	0.015054	0.018021	0.008948																																					-53.5132	-53.9293
			-62.6543	-63.2867	-62.6543	-64.9029		0.018028	0.015061	0.018028	0.008948																																					-53.2754	-53.6884
			-62.65	-63.2811	-62.65	-64.8984		0.018035	0.015068	0.018035	0.008948																																					-53.0384	-53.4485
			-62.6441	-63.2738	-62.6441	-64.8922		0.018042	0.015075	0.018042	0.008948																																					-52.8031	-53.2102
			-62.6367	-63.2651	-62.6367	-64.8844		0.01805	0.015083	0.01805	0.008948																																					-52.5702	-52.9745
			-62.6278	-63.2549	-62.6278	-64.8751		0.018057	0.015091	0.018057	0.008948																																					-52.3404	-52.742
			-62.6175	-63.2432	-62.6175	-64.8642		0.018064	0.015099	0.018064	0.008948																																					-52.1143	-52.5132
			-62.6058	-63.2302	-62.6058	-64.8518		0.018072	0.015107	0.018072	0.008947																																					-51.8922	-52.2886
			-62.5928	-63.2158	-62.5928	-64.838		0.01808	0.015115	0.01808	0.008947																																					-51.6745	-52.0686
			-62.5786	-63.2001	-62.5786	-64.8228		0.018088	0.015123	0.018088	0.008947																																					-51.4616	-51.8534
			-62.5631	-63.1833	-62.5631	-64.8063		0.018096	0.015131	0.018096	0.008947																																					-51.2536	-51.6432
			-62.5465	-63.1653	-62.5465	-64.7887		0.018104	0.01514	0.018104	0.008947																																					-51.0506	-51.4383
			-62.5288	-63.1463	-62.5288	-64.7699		0.018112	0.015148	0.018112	0.008947																																					-50.8529	-51.2388
			-62.5102	-63.1263	-62.5102	-64.7501		0.018121	0.015157	0.018121	0.008947																																					-50.6605	-51.0447
			-62.4906	-63.1053	-62.4906	-64.7293		0.018129	0.015166	0.018129	0.008947																																					-50.4735	-50.8561
			-62.4702	-63.0836	-62.4702	-64.7075		0.018138	0.015175	0.018138	0.008947																																					-50.2918	-50.6731
			-62.449	-63.061	-62.449	-64.685		0.018146	0.015184	0.018146	0.008946																																					-50.1155	-50.4955
			-62.427	-63.0377	-62.427	-64.6616		0.018155	0.015193	0.018155	0.008946																																					-49.9445	-50.3235
			-62.4044	-63.0138	-62.4044	-64.6376		0.018164	0.015202	0.018164	0.008946																																					-49.7788	-50.157
			-62.3812	-62.9893	-62.3812	-64.613		0.018173	0.015212	0.018173	0.008946																																					-49.6183	-49.9958
			-62.3575	-62.9642	-62.3575	-64.5878		0.018182	0.015221	0.018182	0.008946																																					-49.463	-49.84
			-62.3333	-62.9387	-62.3333	-64.562		0.018192	0.015231	0.018192	0.008946																																					-49.3126	-49.6893
			-62.3086	-62.9128	-62.3086	-64.5359		0.018201	0.015241	0.018201	0.008946																																					-49.1673	-49.5439
			-62.2835	-62.8865	-62.2835	-64.5093		0.01821	0.01525	0.01821	0.008946																																					-49.0268	-49.4034
			-62.2581	-62.8598	-62.2581	-64.4824		0.01822	0.01526	0.01822	0.008946																																					-48.891	-49.2679
			-62.2325	-62.8329	-62.2325	-64.4553		0.018229	0.01527	0.018229	0.008945																																					-48.7598	-49.1372
			-62.2065	-62.8058	-62.2065	-64.4278		0.018239	0.01528	0.018239	0.008945																																					-48.6332	-49.0112
			-62.1804	-62.7785	-62.1804	-64.4002		0.018249	0.01529	0.018249	0.008945																																					-48.5109	-48.8898
			-62.1541	-62.751	-62.1541	-64.3725		0.018258	0.0153	0.018258	0.008945																																					-48.3929	-48.7728
			-62.1276	-62.7235	-62.1276	-64.3446		0.018268	0.01531	0.018268	0.008945																																					-48.279	-48.6601
			-62.1011	-62.6958	-62.1011	-64.3167		0.018278	0.015321	0.018278	0.008945																																					-48.1691	-48.5517
			-62.0745	-62.6682	-62.0745	-64.2887		0.018288	0.015331	0.018288	0.008945																																					-48.0632	-48.4474
			-62.0478	-62.6405	-62.0478	-64.2607		0.018298	0.015341	0.018298	0.008945																																					-47.961	-48.347
			-62.0212	-62.6128	-62.0212	-64.2327		0.018308	0.015352	0.018308	0.008944																																					-47.8625	-48.2505
			-61.9945	-62.5852	-61.9945	-64.2049		0.018319	0.015362	0.018319	0.008944																																					-47.7675	-48.1577
			-61.9679	-62.5576	-61.9679	-64.177		0.018329	0.015373	0.018329	0.008944																																					-47.676	-48.0686
			-61.9414	-62.5301	-61.9414	-64.1493		0.018339	0.015384	0.018339	0.008944																																					-47.5879	-47.9829
			-61.915	-62.5028	-61.915	-64.1218		0.01835	0.015394	0.01835	0.008944																																					-47.5029	-47.9007
			-61.8886	-62.4756	-61.8886	-64.0944		0.01836	0.015405	0.01836	0.008944																																					-47.4211	-47.8217
			-61.8624	-62.4485	-61.8624	-64.0672		0.01837	0.015416	0.01837	0.008944																																					-47.3424	-47.746
			-61.8363	-62.4217	-61.8363	-64.0401		0.018381	0.015427	0.018381	0.008944																																					-47.2666	-47.6734
			-61.8104	-62.395	-61.8104	-64.0133		0.018391	0.015437	0.018391	0.008944																																					-47.1937	-47.6037
			-61.7846	-62.3685	-61.7846	-63.9867		0.018402	0.015448	0.018402	0.008943																																					-47.1235	-47.537
			-61.759	-62.3422	-61.759	-63.9604		0.018413	0.015459	0.018413	0.008943																																					-47.0561	-47.4732
			-61.7336	-62.3162	-61.7336	-63.9343		0.018423	0.01547	0.018423	0.008943																																					-46.9913	-47.412
			-61.7084	-62.2904	-61.7084	-63.9085		0.018434	0.015481	0.018434	0.008943																																					-46.9291	-47.3536
			-61.6835	-62.2648	-61.6835	-63.883		0.018445	0.015493	0.018445	0.008943																																					-46.8693	-47.2977
			-61.6587	-62.2395	-61.6587	-63.8578		0.018456	0.015504	0.018456	0.008943																																					-46.812	-47.2444
			-61.6342	-62.2145	-61.6342	-63.8328		0.018467	0.015515	0.018467	0.008943																																					-46.757	-47.1935
			-61.6099	-62.1898	-61.6099	-63.8082		0.018477	0.015526	0.018477	0.008943																																					-46.7043	-47.145
			-61.5859	-62.1653	-61.5859	-63.784		0.018488	0.015537	0.018488	0.008943																																					-46.6539	-47.0988
			-61.5622	-62.1412	-61.5622	-63.76		0.018499	0.015548	0.018499	0.008942																																					-46.6056	-47.0548
			-61.5387	-62.1173	-61.5387	-63.7364		0.01851	0.01556	0.01851	0.008942																																					-46.5594	-47.013
			-61.5154	-62.0937	-61.5154	-63.7131		0.018521	0.015571	0.018521	0.008942																																					-46.5152	-46.9734
			-61.4925	-62.0705	-61.4925	-63.6902		0.018532	0.015582	0.018532	0.008942																																					-46.4731	-46.9358
			-61.4698	-62.0475	-61.4698	-63.6676		0.018543	0.015594	0.018543	0.008942																																					-46.4329	-46.9002
			-61.4474	-62.0249	-61.4474	-63.6454		0.018554	0.015605	0.018554	0.008942																																					-46.3946	-46.8665
			-61.4253	-62.0026	-61.4253	-63.6235		0.018566	0.015616	0.018566	0.008942																																					-46.3581	-46.8347
			-61.4034	-61.9806	-61.4034	-63.602		0.018577	0.015628	0.018577	0.008942																																					-46.3234	-46.8048
			-61.3819	-61.959	-61.3819	-63.5809		0.018588	0.015639	0.018588	0.008942																																					-46.2905	-46.7767
			-61.3606	-61.9376	-61.3606	-63.5601		0.018599	0.015651	0.018599	0.008941																																					-46.2593	-46.7503
			-61.3396	-61.9166	-61.3396	-63.5397		0.01861	0.015662	0.01861	0.008941																																					-46.2298	-46.7256
			-61.319	-61.896	-61.319	-63.5197		0.018621	0.015673	0.018621	0.008941																																					-46.2019	-46.7025
			-61.2986	-61.8756	-61.2986	-63.5		0.018633	0.015685	0.018633	0.008941																																					-46.1756	-46.6811
			-61.2785	-61.8556	-61.2785	-63.4807		0.018644	0.015696	0.018644	0.008941																																					-46.1508	-46.6612
			-61.2587	-61.8359	-61.2587	-63.4618		0.018655	0.015708	0.018655	0.008941																																					-46.1276	-46.6428
			-61.2392	-61.8165	-61.2392	-63.4432		0.018666	0.015719	0.018666	0.008941																																					-46.1058	-46.6259
			-61.22	-61.7975	-61.22	-63.425		0.018678	0.015731	0.018678	0.008941																																					-46.0855	-46.6105
			-61.2011	-61.7788	-61.2011	-63.4072		0.018689	0.015742	0.018689	0.008941																																					-46.0666	-46.5964
			-61.1825	-61.7604	-61.1825	-63.3897		0.0187	0.015754	0.0187	0.00894																																					-46.049	-46.5837
			-61.1642	-61.7423	-61.1642	-63.3726		0.018712	0.015766	0.018712	0.00894																																					-46.0328	-46.5724
			-61.1462	-61.7246	-61.1462	-63.3559		0.018723	0.015777	0.018723	0.00894																																					-46.0179	-46.5623
			-61.1285	-61.7072	-61.1285	-63.3395		0.018734	0.015789	0.018734	0.00894																																					-46.0043	-46.5535
			-61.111	-61.6901	-61.111	-63.3235		0.018746	0.0158	0.018746	0.00894																																					-45.9919	-46.546
			-61.0939	-61.6734	-61.0939	-63.3078		0.018757	0.015812	0.018757	0.00894																																					-45.9808	-46.5396
			-61.0771	-61.6569	-61.0771	-63.2925		0.018768	0.015823	0.018768	0.00894																																					-45.9708	-46.5344
			-61.0605	-61.6408	-61.0605	-63.2776		0.01878	0.015835	0.01878	0.00894																																					-45.962	-46.5303
			-61.0443	-61.625	-61.0443	-63.263		0.018791	0.015846	0.018791	0.00894																																					-45.9544	-46.5273
			-61.0283	-61.6095	-61.0283	-63.2488		0.018802	0.015858	0.018802	0.008939																																					-45.9478	-46.5254
			-61.0126	-61.5943	-61.0126	-63.2349		0.018814	0.01587	0.018814	0.008939																																					-45.9424	-46.5246
			-60.9972	-61.5795	-60.9972	-63.2213		0.018825	0.015881	0.018825	0.008939																																					-45.938	-46.5248
			-60.9821	-61.5649	-60.9821	-63.2081		0.018836	0.015893	0.018836	0.008939																																					-45.9347	-46.526
			-60.9673	-61.5506	-60.9673	-63.1952		0.018848	0.015904	0.018848	0.008939																																					-45.9324	-46.5281
			-60.9528	-61.5367	-60.9528	-63.1827		0.018859	0.015916	0.018859	0.008939																																					-45.931	-46.5312
			-60.9385	-61.523	-60.9385	-63.1705		0.01887	0.015927	0.01887	0.008939																																					-45.9307	-46.5352
			-60.9246	-61.5097	-60.9246	-63.1586		0.018882	0.015939	0.018882	0.008939																																					-45.9313	-46.5402
			-60.9109	-61.4966	-60.9109	-63.147		0.018893	0.01595	0.018893	0.008939																																					-45.9328	-46.546
			-60.8974	-61.4839	-60.8974	-63.1358		0.018904	0.015962	0.018904	0.008938																																					-45.9352	-46.5526
			-60.8843	-61.4714	-60.8843	-63.1249		0.018916	0.015973	0.018916	0.008938																																					-45.9386	-46.5601
			-60.8714	-61.4592	-60.8714	-63.1143		0.018927	0.015985	0.018927	0.008938																																					-45.9428	-46.5684
			-60.8588	-61.4473	-60.8588	-63.104		0.018938	0.015996	0.018938	0.008938																																					-45.9478	-46.5775
			-60.8465	-61.4357	-60.8465	-63.094		0.01895	0.016008	0.01895	0.008938																																					-45.9537	-46.5874
			-60.8344	-61.4244	-60.8344	-63.0844		0.018961	0.016019	0.018961	0.008938																																					-45.9604	-46.598
			-60.8226	-61.4133	-60.8226	-63.075		0.018972	0.016031	0.018972	0.008938																																					-45.9679	-46.6094
			-60.811	-61.4025	-60.811	-63.066		0.018984	0.016042	0.018984	0.008938																																					-45.9762	-46.6215
			-60.7998	-61.392	-60.7998	-63.0572		0.018995	0.016054	0.018995	0.008938																																					-45.9852	-46.6342
			-60.7887	-61.3818	-60.7887	-63.0487		0.019006	0.016065	0.019006	0.008937																																					-45.995	-46.6477
			-60.778	-61.3718	-60.778	-63.0406		0.019018	0.016077	0.019018	0.008937																																					-46.0055	-46.6618
			-60.7675	-61.3621	-60.7675	-63.0327		0.019029	0.016088	0.019029	0.008937																																					-46.0168	-46.6766
			-60.7572	-61.3526	-60.7572	-63.0251		0.01904	0.0161	0.01904	0.008937																																					-46.0287	-46.692
			-60.7472	-61.3435	-60.7472	-63.0177		0.019051	0.016111	0.019051	0.008937																																					-46.0413	-46.7081
			-60.7375	-61.3345	-60.7375	-63.0107		0.019063	0.016122	0.019063	0.008937																																					-46.0546	-46.7247
			-60.7279	-61.3258	-60.7279	-63.0039		0.019074	0.016134	0.019074	0.008937																																					-46.0686	-46.7419
			-60.7187	-61.3174	-60.7187	-62.9974		0.019085	0.016145	0.019085	0.008937																																					-46.0831	-46.7597
			-60.7097	-61.3092	-60.7097	-62.9912		0.019096	0.016156	0.019096	0.008937																																					-46.0984	-46.7781
			-60.7009	-61.3013	-60.7009	-62.9852		0.019107	0.016168	0.019107	0.008936																																					-46.1142	-46.797
			-60.6924	-61.2936	-60.6924	-62.9795		0.019119	0.016179	0.019119	0.008936																																					-46.1306	-46.8164
			-60.6841	-61.2862	-60.6841	-62.974		0.01913	0.01619	0.01913	0.008936																																					-46.1476	-46.8364
			-60.676	-61.2789	-60.676	-62.9688		0.019141	0.016202	0.019141	0.008936																																					-46.1652	-46.8569
			-60.6682	-61.272	-60.6682	-62.9639		0.019152	0.016213	0.019152	0.008936																																					-46.1834	-46.8778
			-60.6606	-61.2652	-60.6606	-62.9592		0.019163	0.016224	0.019163	0.008936																																					-46.2021	-46.8993
			-60.6532	-61.2587	-60.6532	-62.9547		0.019174	0.016236	0.019174	0.008936																																					-46.2213	-46.9212
			-60.6461	-61.2524	-60.6461	-62.9505		0.019185	0.016247	0.019185	0.008936																																					-46.2411	-46.9436
			-60.6392	-61.2464	-60.6392	-62.9465		0.019196	0.016258	0.019196	0.008936																																					-46.2614	-46.9664
			-60.6325	-61.2405	-60.6325	-62.9428		0.019208	0.016269	0.019208	0.008935																																					-46.2822	-46.9897
			-60.626	-61.2349	-60.626	-62.9393		0.019219	0.01628	0.019219	0.008935																																					-46.3035	-47.0134
			-60.6198	-61.2295	-60.6198	-62.936		0.01923	0.016292	0.01923	0.008935																																					-46.3253	-47.0375
			-60.6137	-61.2243	-60.6137	-62.933		0.019241	0.016303	0.019241	0.008935																																					-46.3475	-47.062
			-60.6079	-61.2193	-60.6079	-62.9302		0.019252	0.016314	0.019252	0.008935																																					-46.3703	-47.0869
			-60.6023	-61.2145	-60.6023	-62.9276		0.019263	0.016325	0.019263	0.008935																																					-46.3934	-47.1122
			-60.5969	-61.21	-60.5969	-62.9252		0.019274	0.016336	0.019274	0.008935																																					-46.4171	-47.1379
			-60.5918	-61.2056	-60.5918	-62.9231		0.019284	0.016347	0.019284	0.008935																																					-46.4411	-47.164
			-60.5868	-61.2015	-60.5868	-62.9211		0.019295	0.016358	0.019295	0.008935																																					-46.4656	-47.1904
			-60.5821	-61.1975	-60.5821	-62.9194		0.019306	0.016369	0.019306	0.008934																																					-46.4905	-47.2171
			-60.5775	-61.1937	-60.5775	-62.9178		0.019317	0.01638	0.019317	0.008934																																					-46.5158	-47.2443
			-60.5732	-61.1902	-60.5732	-62.9165		0.019328	0.016391	0.019328	0.008934																																					-46.5415	-47.2717
			-60.569	-61.1868	-60.569	-62.9154		0.019339	0.016402	0.019339	0.008934																																					-46.5676	-47.2995
			-60.5651	-61.1836	-60.5651	-62.9145		0.01935	0.016413	0.01935	0.008934																																					-46.5941	-47.3275
			-60.5613	-61.1806	-60.5613	-62.9138		0.019361	0.016424	0.019361	0.008934																																					-46.6209	-47.3559
			-60.5578	-61.1778	-60.5578	-62.9132		0.019371	0.016435	0.019371	0.008934																																					-46.6481	-47.3846
			-60.5544	-61.1752	-60.5544	-62.9129		0.019382	0.016446	0.019382	0.008934																																					-46.6757	-47.4136
			-60.5512	-61.1728	-60.5512	-62.9128		0.019393	0.016457	0.019393	0.008934																																					-46.7036	-47.4429
			-60.5483	-61.1705	-60.5483	-62.9128		0.019404	0.016467	0.019404	0.008933																																					-46.7319	-47.4725
			-60.5455	-61.1684	-60.5455	-62.913		0.019414	0.016478	0.019414	0.008933																																					-46.7604	-47.5023
			-60.5429	-61.1665	-60.5429	-62.9134		0.019425	0.016489	0.019425	0.008933																																					-46.7894	-47.5324
			-60.5405	-61.1648	-60.5405	-62.914		0.019436	0.0165	0.019436	0.008933																																					-46.8186	-47.5627
			-60.5382	-61.1632	-60.5382	-62.9148		0.019446	0.016511	0.019446	0.008933																																					-46.8481	-47.5933
			-60.5362	-61.1618	-60.5362	-62.9157		0.019457	0.016521	0.019457	0.008933																																					-46.878	-47.6242
			-60.5343	-61.1606	-60.5343	-62.9168		0.019467	0.016532	0.019467	0.008933																																					-46.9081	-47.6553
			-60.5326	-61.1595	-60.5326	-62.9181		0.019478	0.016543	0.019478	0.008933																																					-46.9386	-47.6866
			-60.5311	-61.1586	-60.5311	-62.9196		0.019489	0.016554	0.019489	0.008933																																					-46.9693	-47.7182
			-60.5297	-61.1578	-60.5297	-62.9212		0.019499	0.016564	0.019499	0.008932																																					-47.0003	-47.7499
			-60.5286	-61.1573	-60.5286	-62.923		0.01951	0.016575	0.01951	0.008932																																					-47.0315	-47.7819
			-60.5276	-61.1568	-60.5276	-62.9249		0.01952	0.016585	0.01952	0.008932																																					-47.0631	-47.8141
			-60.5267	-61.1565	-60.5267	-62.927		0.019531	0.016596	0.019531	0.008932																																					-47.0949	-47.8465
			-60.5261	-61.1564	-60.5261	-62.9293		0.019541	0.016607	0.019541	0.008932																																					-47.1269	-47.8791
			-60.5256	-61.1564	-60.5256	-62.9317		0.019551	0.016617	0.019551	0.008932																																					-47.1592	-47.9119
			-60.5252	-61.1566	-60.5252	-62.9342		0.019562	0.016628	0.019562	0.008932																																					-47.1917	-47.9448
			-60.525	-61.1569	-60.525	-62.9369		0.019572	0.016638	0.019572	0.008932																																					-47.2244	-47.978
			-60.525	-61.1574	-60.525	-62.9398		0.019583	0.016649	0.019583	0.008932																																					-47.2574	-48.0113
			-60.5252	-61.158	-60.5252	-62.9428		0.019593	0.016659	0.019593	0.008931																																					-47.2906	-48.0448
			-60.5255	-61.1587	-60.5255	-62.946		0.019603	0.01667	0.019603	0.008931																																					-47.324	-48.0785
			-60.5259	-61.1596	-60.5259	-62.9492		0.019613	0.01668	0.019613	0.008931																																					-47.3577	-48.1123
			-60.5265	-61.1606	-60.5265	-62.9527		0.019624	0.01669	0.019624	0.008931																																					-47.3915	-48.1463
			-60.5273	-61.1618	-60.5273	-62.9563		0.019634	0.016701	0.019634	0.008931																																					-47.4255	-48.1804
			-60.5282	-61.1631	-60.5282	-62.96		0.019644	0.016711	0.019644	0.008931																																					-47.4597	-48.2147
			-60.5293	-61.1645	-60.5293	-62.9638		0.019654	0.016721	0.019654	0.008931																																					-47.4942	-48.2491
			-60.5305	-61.1661	-60.5305	-62.9678		0.019665	0.016732	0.019665	0.008931																																					-47.5288	-48.2837
			-60.5318	-61.1678	-60.5318	-62.9719		0.019675	0.016742	0.019675	0.008931																																					-47.5635	-48.3183
			-60.5333	-61.1696	-60.5333	-62.9761		0.019685	0.016752	0.019685	0.00893																																					-47.5985	-48.3532
			-60.5349	-61.1715	-60.5349	-62.9805		0.019695	0.016762	0.019695	0.00893																																					-47.6336	-48.3881
			-60.5367	-61.1736	-60.5367	-62.985		0.019705	0.016773	0.019705	0.00893																																					-47.6689	-48.4232
			-60.5386	-61.1757	-60.5386	-62.9896		0.019715	0.016783	0.019715	0.00893																																					-47.7043	-48.4583
			-60.5407	-61.178	-60.5407	-62.9943		0.019725	0.016793	0.019725	0.00893																																					-47.7399	-48.4936
			-60.5429	-61.1804	-60.5429	-62.9991		0.019735	0.016803	0.019735	0.00893																																					-47.7757	-48.529
			-60.5452	-61.183	-60.5452	-63.0041		0.019745	0.016813	0.019745	0.00893																																					-47.8115	-48.5645
			-60.5477	-61.1856	-60.5477	-63.0092		0.019755	0.016823	0.019755	0.00893																																					-47.8476	-48.6001
			-60.5502	-61.1884	-60.5502	-63.0144		0.019765	0.016833	0.019765	0.00893																																					-47.8837	-48.6358
			-60.553	-61.1913	-60.553	-63.0197		0.019775	0.016843	0.019775	0.008929																																					-47.92	-48.6716
			-60.5558	-61.1943	-60.5558	-63.0251		0.019785	0.016853	0.019785	0.008929																																					-47.9565	-48.7075
			-60.5588	-61.1974	-60.5588	-63.0306		0.019794	0.016863	0.019794	0.008929																																					-47.993	-48.7435
			-60.5619	-61.2006	-60.5619	-63.0363		0.019804	0.016873	0.019804	0.008929																																					-48.0297	-48.7795
			-60.5651	-61.2039	-60.5651	-63.042		0.019814	0.016883	0.019814	0.008929																																					-48.0665	-48.8156
			-60.5684	-61.2073	-60.5684	-63.0479		0.019824	0.016893	0.019824	0.008929																																					-48.1034	-48.8518
			-60.5719	-61.2108	-60.5719	-63.0538		0.019834	0.016903	0.019834	0.008929																																					-48.1404	-48.8881
			-60.5755	-61.2144	-60.5755	-63.0599		0.019843	0.016913	0.019843	0.008929																																					-48.1775	-48.9244
			-60.5792	-61.2181	-60.5792	-63.066		0.019853	0.016923	0.019853	0.008929																																					-48.2147	-48.9609
			-60.583	-61.222	-60.583	-63.0723		0.019863	0.016933	0.019863	0.008928																																					-48.252	-48.9973
			-60.5869	-61.2259	-60.5869	-63.0786		0.019872	0.016942	0.019872	0.008928																																					-48.2894	-49.0339
			-60.5909	-61.2299	-60.5909	-63.0851		0.019882	0.016952	0.019882	0.008928																																					-48.3269	-49.0704
			-60.5951	-61.234	-60.5951	-63.0916		0.019892	0.016962	0.019892	0.008928																																					-48.3644	-49.1071
			-60.5993	-61.2382	-60.5993	-63.0983		0.019901	0.016972	0.019901	0.008928																																					-48.4021	-49.1438
			-60.6037	-61.2425	-60.6037	-63.105		0.019911	0.016981	0.019911	0.008928																																					-48.4398	-49.1805
			-60.6082	-61.2469	-60.6082	-63.1118		0.01992	0.016991	0.01992	0.008928																																					-48.4776	-49.2173
[truncated: 7,402 more rows]
[truncated: 12 more columns]
