# Supplementary material for: Dendritic sodium spikes are required for long-term potentiation at distal synapses on hippocampal pyramidal neurons
Source: eLife. 2015 Aug 6;4:e06414. doi: 10.7554/eLife.06414 (PMC4576155; doi:10.7554/eLife.06414)
Supplement: Figure 8—source data 2. — DOI: http://dx.doi.org/10.7554/eLife.06414.030 [file elife06414s013.xlsx]

## Sheet: Figure 8S1
For two-photon imaging, sampling rate (Hz): Control = 465.04; Nimodipine = 400.893	Panel B	Top	Control	Nimo	Bottom	Control	Nimo		Panel C	Top		Nimo	Bottom		Nimo		Panel E	Control	Nimo		Panel F	Top	Peak ∆G/R		Nimo	Integral ∆G/R		Nimo	Bottom	Peak ∆[Ca2+]OGB		Nimo	Integral ∆[Ca2+]OGB		Nimo		Panel G	V	Control	Nimo	ICa (NMDA)	Control	Nimo	ICa (L-Cav)	Control	Nimo
Artifacts are truncated in figures			0.00301362	-0.00731285		-167.847	-189.209				Mean	0.977578		Mean	1.07362			0.006656	0.006656					Mean	0.977578		Mean	1.07362			Mean	0.82		Mean	0.77				-71.7804	-71.7794		0	0		0	0
			0.0060218	-0.00797224		-238.037	-186.157				SEM	0.0765677		SEM	0.118379			0.006656	0.006656					SD	0.171211		SD	0.264704			SD	0.209762		SD	0.209762				-71.7803	-71.7794		0	0		0	0
			0.00717082	-0.00830798		-234.985	-198.364											0.006656	0.006656																				-71.7802	-71.7793		0	0		0	0
			0.00648938	-0.00856574		-225.83	-161.743											0.006656	0.006656																				-71.7801	-71.7792		0	0		0	0
			0.0040172	-0.00870444		-253.296	-177.002											0.006656	0.006656																				-71.78	-71.7791		0	0		0	0
			-6.78742e-05	-0.00842939		-241.089	-161.743											0.006656	0.006656																				-71.7799	-71.779		0	0		0	0
			-0.00526764	-0.00742203		-216.675	-155.64											0.006656	0.006656																				-71.7798	-71.7789		0	0		0	0
			-0.0107386	-0.00560359		-259.399	-170.898											0.006656	0.006656																				-71.7797	-71.7788		0	0		0	0
			-0.0154952	-0.00324124		-219.727	-131.226											0.006656	0.006656																				-71.7796	-71.7787		0	0		0	0
			-0.0187043	-0.000814105		-204.468	-170.898											0.006656	0.006656																				-71.7795	-71.7786		0	0		0	0
			-0.01986	0.00127214		-256.348	-198.364											0.006656	0.006656																				-71.7794	-71.7785		0	0		0	0
			-0.0187413	0.00292433		-241.089	-186.157											0.006656	0.006656																				-71.7793	-71.7784		0	0		0	0
			-0.0152559	0.00439163		-173.95	-170.898											0.006656	0.006656																				-71.7792	-71.7783		0	0		0	0
			-0.00935247	0.00607155		-228.882	-192.261											0.006656	0.006656																				-71.7792	-71.7782		0	0		0	0
			-0.00109638	0.00822786		-262.451	-189.209											0.006656	0.006656																				-71.7791	-71.7781		0	0		0	0
			0.00916585	0.0108084		-250.244	-170.898											0.006656	0.006656																				-71.779	-71.778		0	0		0	0
			0.0207243	0.0134928		-244.141	-222.778											0.006656	0.006656																				-71.7789	-71.778		0	0		0	0
			0.0326209	0.0159893		-280.762	-189.209											0.006656	0.006656																				-71.7788	-71.7779		0	0		0	0
			0.0439331	0.018499		-231.934	-216.675											0.006656	0.006656																				-71.7787	-71.7778		0	0		0	0
			0.0540778	0.0221837		-265.503	-216.675											0.006656	0.006656																				-71.7786	-71.7777		0	0		0	0
			0.0629868	0.0294238		-195.312	-207.52											0.006656	0.006656																				-71.7785	-71.7776		0	0		0	0
			0.0711113	0.0436638		-228.882	-177.002											0.006656	0.006656																				-71.7784	-71.7775		0	0		0	0
			0.0793442	0.0687551		-201.416	-177.002											0.006656	0.006656																				-71.7783	-71.7774		0	0		0	0
			0.0889962	0.107928		-180.054	-170.898											0.006656	0.006656																				-71.7782	-71.7773		0	0		0	0
			0.101872	0.162743		-219.727	-192.261											0.006656	0.006656																				-71.7781	-71.7772		0	0		0	0
			0.120342	0.232464		-170.898	-155.64											0.006656	0.006656																				-71.778	-71.7771		0	0		0	0
			0.147218	0.314143		-207.52	-213.623											0.006656	0.006656																				-71.7779	-71.777		0	0		0	0
			0.185268	0.403429		-256.348	-210.571											0.006656	0.006656																				-71.7779	-71.7769		0	0		0	0
			0.236458	0.495755		-161.743	-198.364											0.006656	0.006656																				-71.7778	-71.7769		0	0		0	0
			0.301196	0.587434		-210.571	-164.795											0.006656	0.006656																				-71.7777	-71.7768		0	0		0	0
			0.377962	0.676296		-192.261	-195.312											0.006656	0.006656																				-71.7776	-71.7767		0	0		0	0
			0.463547	0.761715		-183.105	-173.95											0.006656	0.006656																				-71.7775	-71.7766		0	0		0	0
			0.553804	0.844135		-225.83	-216.675											0.006656	0.006656																				-71.7774	-71.7765		0	0		0	0
			0.644574	0.924297		-155.64	-146.484											0.006656	0.006656																				-71.7773	-71.7764		0	0		0	0
			0.732382	1.00244		-177.002	-207.52											0.006656	0.006656																				-71.7772	-71.7763		0	0		0	0
			0.814731	1.07771		-201.416	-173.95											0.006656	0.006656																				-71.7771	-71.7762		0	0		0	0
			0.89007	1.14811		-128.174	-189.209											0.006656	0.006656																				-71.777	-71.7761		0	0		0	0
			0.957632	1.2109		-210.571	-167.847											0.006656	0.006656																				-71.7769	-71.776		0	0		0	0
			1.0173	1.26353		-198.364	-161.743											0.006656	0.006656																				-71.7769	-71.776		0	0		0	0
			1.06943	1.30448		-149.536	-158.691											0.006656	0.006656																				-71.7768	-71.7759		0	0		0	0
			1.11463	1.33384		-170.898	-161.743											0.006656	0.006656																				-71.7767	-71.7758		0	0		0	0
			1.15337	1.3531		-219.727	-167.847											0.006656	0.006656																				-71.7766	-71.7757		0	0		0	0
			1.18578	1.36451		-134.277	-158.691											0.006656	0.006656																				-71.7765	-71.7756		0	0		0	0
			1.21165	1.37023		-204.468	-140.381											0.006656	0.006656																				-71.7764	-71.7755		0	0		0	0
			1.23073	1.37177		-259.399	-189.209											0.006656	0.006656																				-71.7763	-71.7754		0	0		0	0
			1.24331	1.36981		-189.209	-140.381											0.006656	0.006656																				-71.7762	-71.7753		0	0		0	0
			1.25049	1.36447		-207.52	-183.105											0.006656	0.006656																				-71.7761	-71.7753		0	0		0	0
			1.25405	1.35576		-219.727	-158.691											0.006656	0.006656																				-71.7761	-71.7752		0	0		0	0
			1.25584	1.34383		-228.882	-146.484											0.006656	0.006656																				-71.776	-71.7751		0	0		0	0
			1.25703	1.32915		-244.141	-155.64											0.006656	0.006656																				-71.7759	-71.775		0	0		0	0
			1.25757	1.31243		-204.468	-173.95											0.006656	0.006656																				-71.7758	-71.7749		0	0		0	0
			1.25628	1.29448		-183.105	-164.795											0.006656	0.006656																				-71.7757	-71.7748		0	0		0	0
			1.25145	1.27616		-180.054	-146.484											0.006656	0.006656																				-71.7756	-71.7747		0	0		0	0
			1.24168	1.25826		-222.778	-195.312											0.006656	0.006656																				-71.7755	-71.7746		0	0		0	0
			1.22656	1.24132		-183.105	-170.898											0.006656	0.006656																				-71.7754	-71.7746		0	0		0	0
			1.20693	1.2254		-231.934	-173.95											0.006656	0.006656																				-71.7754	-71.7745		0	0		0	0
			1.18462	1.2099		-225.83	-177.002											0.006656	0.006656																				-71.7753	-71.7744		0	0		0	0
			1.16192	1.19365		-207.52	-177.002											0.006656	0.006656																				-71.7752	-71.7743		0	0		0	0
			1.141	1.17529		-222.778	-170.898											0.006656	0.006656																				-71.7751	-71.7742		0	0		0	0
			1.1233	1.15394		-225.83	-167.847											0.006656	0.006656																				-71.775	-71.7741		0	0		0	0
			1.10933	1.12965		-216.675	-115.967											0.006656	0.006656																				-71.7749	-71.774		0	0		0	0
			1.09868	1.10358		-210.571	-161.743											0.006656	0.006656																				-71.7748	-71.774		0	0		0	0
			1.09027	1.0776		-247.192	-204.468											0.006656	0.006656																				-71.7747	-71.7739		0	0		0	0
			1.08279	1.05362		-180.054	-164.795											0.006656	0.006656																				-71.7747	-71.7738		0	0		0	0
			1.07507	1.03296		-152.588	-167.847											0.006656	0.006656																				-71.7746	-71.7737		0	0		0	0
			1.06635	1.01599		-177.002	-173.95											0.006656	0.006656																				-71.7745	-71.7736		0	0		0	0
			1.05634	1.00233		-207.52	-170.898											0.006656	0.006656																				-71.7744	-71.7735		0	0		0	0
			1.0452	0.991292		-164.795	-192.261											0.006656	0.006656																				-71.7743	-71.7735		0	0		0	0
			1.03341	0.982291		-204.468	-183.105											0.006656	0.006656																				-71.7742	-71.7734		0	0		0	0
			1.02161	0.97507		-167.847	-186.157											0.006656	0.006656																				-71.7741	-71.7733		0	0		0	0
			1.01049	0.969585		-152.588	-207.52											0.006656	0.006656																				-71.7741	-71.7732		0	0		0	0
			1.00066	0.965758		-228.882	-234.985											0.006656	0.006656																				-71.774	-71.7731		0	0		0	0
			0.992429	0.963246		-158.691	-167.847											0.006656	0.006656																				-71.7739	-71.773		0	0		0	0
			0.985719	0.961351		-158.691	-225.83											0.006656	0.006656																				-71.7738	-71.7729		0	0		0	0
			0.979902	0.959087		-225.83	-222.778											0.006656	0.006656																				-71.7737	-71.7729		0	0		0	0
			0.973898	0.95535		-128.174	-195.312											0.006656	0.006656																				-71.7736	-71.7728		0	0		0	0
			0.966441	0.949162		-186.157	-192.261											0.006656	0.006656																				-71.7736	-71.7727		0	0		0	0
			0.956528	0.939913		-189.209	-231.934											0.006656	0.006656																				-71.7735	-71.7726		0	0		0	0
			0.943848	0.927551		-192.261	-173.95											0.006656	0.006656																				-71.7734	-71.7725		0	0		0	0
			0.929015	0.912611		-158.691	-195.312											0.006656	0.006656																				-71.7733	-71.7725		0	0		0	0
			0.91347	0.896078		-161.743	-173.95											0.006656	0.006656																				-71.7732	-71.7724		0	0		0	0
			0.899059	0.879132		-238.037	-180.054											0.006656	0.006656																				-71.7731	-71.7723		0	0		0	0
			0.887433	0.862881		-201.416	-137.329											0.006656	0.006656																				-71.7731	-71.7722		0	0		0	0
			0.879446	0.848176		-204.468	-164.795											0.006656	0.006656																				-71.773	-71.7721		0	0		0	0
			0.874791	0.835509		-170.898	-216.675											0.006656	0.006656																				-71.7729	-71.772		0	0		0	0
			0.87204	0.824975		-195.312	-167.847											0.006656	0.006656																				-71.7728	-71.772		0	0		0	0
			0.869164	0.816283		-198.364	-167.847											0.006656	0.006656																				-71.7727	-71.7719		0	0		0	0
			0.864345	0.808836		-225.83	-161.743											0.006656	0.006656																				-71.7726	-71.7718		0	0		0	0
			0.856759	0.801892		-192.261	-119.019											0.006656	0.006656																				-71.7726	-71.7717		0	0		0	0
			0.846903	0.794774		-180.054	-173.95											0.006656	0.006656																				-71.7725	-71.7716		0	0		0	0
			0.836304	0.787061		-198.364	-134.277											0.006656	0.006656																				-71.7724	-71.7716		0	0		0	0
			0.826741	0.778687		-152.588	-186.157											0.006656	0.006656																				-71.7723	-71.7715		0	0		0	0
			0.8194	0.769918		-180.054	-177.002											0.006656	0.006656																				-71.7722	-71.7714		0	0		0	0
			0.814375	0.761222		-234.985	-158.691											0.006656	0.006656																				-71.7721	-71.7713		0	0		0	0
			0.810756	0.753078		-173.95	-140.381											0.006656	0.006656																				-71.7721	-71.7712		0	0		0	0
			0.807158	0.745772		-189.209	-161.743											0.006656	0.006656																				-71.772	-71.7711		0	0		0	0
			0.80239	0.739264		-167.847	-192.261											0.006656	0.006656																				-71.7719	-71.7711		0	0		0	0
			0.795882	0.733194		-198.364	-134.277											0.006656	0.006656																				-71.7718	-71.771		0	0		0	0
			0.787728	0.727044		-170.898	-170.898											0.006656	0.006656																				-71.7717	-71.7709		0	0		0	0
			0.778417	0.720381		-250.244	-131.226											0.006656	0.006656																				-71.7717	-71.7708		0	0		0	0
			0.7685	0.713073		-143.433	-183.105											0.006656	0.006656																				-71.7716	-71.7707		0	0		0	0
			0.758411	0.705338		-195.312	-201.416											0.006656	0.006656																				-71.7715	-71.7707		0	0		0	0
			0.748498	0.697607		-195.312	-170.898											0.006656	0.006656																				-71.7714	-71.7706		0	0		0	0
			0.739128	0.690269		-143.433	-155.64											0.006656	0.006656																				-71.7713	-71.7705		0	0		0	0
			0.730708	0.683479		-177.002	-177.002											0.006656	0.006656																				-71.7713	-71.7704		0	0		0	0
			0.723521	0.677118		-204.468	-177.002											0.006656	0.006656																				-71.7712	-71.7703		0	0		0	0
			0.71751	0.670946		-149.536	-164.795											0.006656	0.006656																				-71.7711	-71.7703		0	0		0	0
			0.712176	0.664792		-195.312	-195.312											0.006656	0.006656																				-71.771	-71.7702		0	0		0	0
			0.706728	0.65866		-164.795	-170.898											0.006656	0.006656																				-71.7709	-71.7701		0	0		0	0
			0.700414	0.652655		-112.915	-177.002											0.006656	0.006656																				-71.7709	-71.77		0	0		0	0
			0.69286	0.646784		-207.52	-204.468											0.006656	0.006656																				-71.7708	-71.77		0	0		0	0
			0.684235	0.640801		-210.571	-183.105											0.006656	0.006656																				-71.7707	-71.7699		0	0		0	0
			0.675193	0.634235		-122.07	-198.364											0.006656	0.006656																				-71.7706	-71.7698		0	0		0	0
			0.666625	0.626652		-140.381	-140.381											0.006656	0.006656																				-71.7705	-71.7697		0	0		0	0
			0.659335	0.618012		-137.329	-216.675											0.006656	0.006656																				-71.7705	-71.7696		0	0		0	0
			0.653741	0.608904		-106.812	-170.898											0.006656	0.006656																				-71.7704	-71.7696		0	0		0	0
			0.649705	0.600469		-155.64	-234.985											0.006656	0.006656																				-71.7703	-71.7695		0	0		0	0
			0.646586	0.594025		-192.261	-186.157											0.006656	0.006656																				-71.7702	-71.7694		0	0		0	0
			0.643513	0.590565		-177.002	-170.898											0.006656	0.006656																				-71.7701	-71.7693		0	0		0	0
			0.639759	0.590381		-170.898	-170.898											0.006656	0.006656																				-71.7701	-71.7693		0	0		0	0
			0.635003	0.592978		-201.416	-173.95											0.006656	0.006656																				-71.77	-71.7692		0	0		0	0
			0.629359	0.59728		-164.795	-173.95											0.006656	0.006656																				-71.7699	-71.7691		0	0		0	0
			0.623221	0.601978		-222.778	-192.261											0.006656	0.006656																				-71.7698	-71.769		0	0		0	0
			0.61707	0.60585		-228.882	-201.416											0.006656	0.006656																				-71.7697	-71.7689		0	0		0	0
			0.611399	0.607936		-146.484	-228.882											0.006656	0.006656																				-71.7697	-71.7689		0	0		0	0
			0.606682	0.607587		-198.364	-189.209											0.006656	0.006656																				-71.7696	-71.7688		0	0		0	0
			0.603303	0.60445		-155.64	-204.468											0.006656	0.006656																				-71.7695	-71.7687		0	0		0	0
			0.601371	0.598483		-195.312	-158.691											0.006656	0.006656																				-71.7694	-71.7686		0	0		0	0
			0.600534	0.589996		-155.64	-161.743											0.006656	0.006656																				-71.7694	-71.7686		0	0		0	0
			0.599993	0.579699		-250.244	-192.261											0.006656	0.006656																				-71.7693	-71.7685		0	0		0	0
			0.598778	0.568659		-167.847	-186.157											0.006656	0.006656																				-71.7692	-71.7684		0	0		0	0
			0.596198	0.558117		-222.778	-177.002											0.006656	0.006656																				-71.7691	-71.7683		0	0		0	0
			0.592177	0.549187		-210.571	-173.95											0.006656	0.006656																				-71.7691	-71.7683		0	0		0	0
			0.58733	0.542543		-161.743	-164.795											0.006656	0.006656																				-71.769	-71.7682		0	0		0	0
			0.582709	0.538222		-244.141	-177.002											0.006656	0.006656																				-71.7689	-71.7681		0	0		0	0
			0.579416	0.535652		-201.416	-146.484											0.006656	0.006656																				-71.7688	-71.768		0	0		0	0
			0.578259	0.533883		-177.002	-134.277											0.006656	0.006656																				-71.7687	-71.768		0	0		0	0
			0.579597	0.531936		-192.261	-170.898											0.006656	0.006656																				-71.7687	-71.7679		0	0		0	0
			0.583357	0.529125		-225.83	-186.157											0.006656	0.006656																				-71.7686	-71.7678		0	0		0	0
			0.58912	0.525246		-204.468	-167.847											0.006656	0.006656																				-71.7685	-71.7677		0	0		0	0
			0.596131	0.52058		-238.037	-177.002											0.006656	0.006656																				-71.7684	-71.7677		0	0		0	0
			0.603248	0.515728		-231.934	-183.105											0.006656	0.006656																				-71.7684	-71.7676		0	0		0	0
			0.608952	0.511332		-219.727	-189.209											0.006656	0.006656																				-71.7683	-71.7675		0	0		0	0
			0.611603	0.507816		-271.606	-158.691											0.006656	0.006656																				-71.7682	-71.7674		0	0		0	0
			0.609949	0.50525		-189.209	-219.727											0.006656	0.006656																				-71.7681	-71.7674		0	0		0	0
			0.60365	0.503391		-177.002	-161.743											0.006656	0.006656																				-71.7681	-71.7673		0	0		0	0
			0.593459	0.501832		-259.399	-207.52											0.006656	0.006656																				-71.768	-71.7672		0	0		0	0
			0.580885	0.500157		-231.934	-177.002											0.006656	0.006656																				-71.7679	-71.7671		0	0		0	0
			0.567494	0.498015		-134.277	-137.329											0.006656	0.006656																				-71.7678	-71.7671		0	0		0	0
			0.554271	0.495136		-234.985	-198.364											0.006656	0.006656																				-71.7678	-71.767		0	0		0	0
			0.541411	0.491354		-164.795	-170.898											0.006656	0.006656																				-71.7677	-71.7669		0	0		0	0
			0.528571			-137.329	-146.484											0.006656	0.006656																				-71.7676	-71.7668		0	0		0	0
			0.515393			-173.95	-164.795											0.006656	0.006656																				-71.7675	-71.7668		0	0		0	0
			0.501969			-180.054	-177.002											0.006656	0.006656																				-71.7675	-71.7667		0	0		0	0
			0.489079			-140.381	-170.898											0.006656	0.006656																				-71.7674	-71.7666		0	0		0	0
			0.478153			-186.157	-192.261											0.006656	0.006656																				-71.7673	-71.7666		0	0		0	0
			0.470964			-222.778	-161.743											0.006656	0.006656																				-71.7672	-71.7665		0	0		0	0
			0.469107			-186.157	-177.002											0.006656	0.006656																				-71.7672	-71.7664		0	0		0	0
			0.473385			-195.312	-164.795											0.006656	0.006656																				-71.7671	-71.7663		0	0		0	0
			0.48331			-186.157	-164.795											0.006656	0.006656																				-71.767	-71.7663		0	0		0	0
			0.496977			-167.847	-134.277											0.006656	0.006656																				-71.767	-71.7662		0	0		0	0
			0.511459			-180.054	-210.571											0.006656	0.006656																				-71.7669	-71.7661		0	0		0	0
			0.523628			-225.83	-155.64											0.006656	0.006656																				-71.7668	-71.766		0	0		0	0
			0.531088			-155.64	-195.312											0.006656	0.006656																				-71.7667	-71.766		0	0		0	0
			0.532818			-158.691	-164.795											0.006656	0.006656																				-71.7667	-71.7659		0	0		0	0
			0.529276			-198.364	-161.743											0.006656	0.006656																				-71.7666	-71.7658		0	0		0	0
			0.521962			-149.536	-143.433											0.006656	0.006656																				-71.7665	-71.7658		0	0		0	0
			0.512695			-164.795	-173.95											0.006656	0.006656																				-71.7664	-71.7657		0	0		0	0
			0.502932			-210.571	-186.157											0.006656	0.006656																				-71.7664	-71.7656		0	0		0	0
			0.493388			-173.95	-167.847											0.006656	0.006656																				-71.7663	-71.7655		0	0		0	0
			0.484054			-161.743	-189.209											0.006656	0.006656																				-71.7662	-71.7655		0	0		0	0
			0.474507			-207.52	-180.054											0.006656	0.006656																				-71.7662	-71.7654		0	0		0	0
			0.464342			-161.743	-180.054											0.006656	0.006656																				-71.7661	-71.7653		0	0		0	0
			0.453503			-189.209	-155.64											0.006656	0.006656																				-71.766	-71.7653		0	0		0	0
			0.442361			-210.571	-192.261											0.006656	0.006656																				-71.7659	-71.7652		0	0		0	0
			0.431541			-216.675	-213.623											0.006656	0.006656																				-71.7659	-71.7651		0	0		0	0
						-173.95	-210.571											0.006656	0.006656																				-71.7658	-71.765		0	0		0	0
						-152.588	-198.364											0.006656	0.006656																				-71.7657	-71.765		0	0		0	0
						-161.743	-183.105											0.006656	0.006656																				-71.7657	-71.7649		0	0		0	0
						-210.571	-201.416											0.006656	0.006656																				-71.7656	-71.7648		0	0		0	0
						-170.898	-234.985											0.006656	0.006656																				-71.7655	-71.7648		0	0		0	0
						-192.261	-192.261											0.006656	0.006656																				-71.7654	-71.7647		0	0		0	0
						-180.054	-201.416											0.006656	0.006656																				-71.7654	-71.7646		0	0		0	0
						-186.157	-231.934											0.006656	0.006656																				-71.7653	-71.7646		0	0		0	0
						-207.52	-161.743											0.006656	0.006656																				-71.7652	-71.7645		0	0		0	0
						-180.054	-167.847											0.006656	0.006656																				-71.7652	-71.7644		0	0		0	0
						-204.468	-183.105											0.006656	0.006656																				-71.7651	-71.7643		0	0		0	0
						-189.209	-158.691											0.006656	0.006656																				-71.765	-71.7643		0	0		0	0
						-173.95	-161.743											0.006656	0.006656																				-71.7649	-71.7642		0	0		0	0
						-161.743	-192.261											0.006656	0.006656																				-71.7649	-71.7641		0	0		0	0
						-228.882	-164.795											0.006656	0.006656																				-71.7648	-71.7641		0	0		0	0
						-189.209	-183.105											0.006656	0.006656																				-71.7647	-71.764		0	0		0	0
						-231.934	-180.054											0.006656	0.006656																				-71.7647	-71.7639		0	0		0	0
						-198.364	-137.329											0.006656	0.006656																				-71.7646	-71.7639		0	0		0	0
						-170.898	-186.157											0.006656	0.006656																				-71.7645	-71.7638		0	0		0	0
						-265.503	-201.416											0.006656	0.006656																				-71.7645	-71.7637		0	0		0	0
						-216.675	-122.07											0.006656	0.006656																				-71.7644	-71.7637		0	0		0	0
						-177.002	-170.898											0.006656	0.006656																				-71.7643	-71.7636		0	0		0	0
						-225.83	-164.795											0.006656	0.006656																				-71.7643	-71.7635		0	0		0	0
						-207.52	-131.226											0.006656	0.006656																				-71.7642	-71.7635		0	0		0	0
						-149.536	-149.536											0.006656	0.006656																				-71.7641	-71.7634		0	0		0	0
						-274.658	-192.261											0.006656	0.006656																				-71.764	-71.7633		0	0		0	0
						-234.985	-173.95											0.006656	0.006656																				-71.6908	-71.69		-2e-06	-2e-06		0	0
						-167.847	-146.484											0.006656	0.006656																				-71.5615	-71.5608		-4e-06	-4e-06		0	0
						-183.105	-183.105											0.006656	0.006656																				-71.3884	-71.3877		-7e-06	-7e-06		0	0
						-207.52	-122.07											0.006657	0.006657																				-71.1809	-71.1802		-9e-06	-9e-06		0	0
						-183.105	-177.002											0.006657	0.006657																				-70.947	-70.9463		-1.1e-05	-1.1e-05		0	0
						-216.675	-231.934											0.006657	0.006657																				-70.6929	-70.6922		-1.3e-05	-1.3e-05		0	0
						-180.054	-186.157											0.006657	0.006657																				-70.4238	-70.4231		-1.5e-05	-1.5e-05		0	0
						-131.226	-167.847											0.006657	0.006657																				-70.144	-70.1433		-1.8e-05	-1.8e-05		0	0
						-228.882	-207.52											0.006658	0.006658																				-69.8569	-69.8562		-2e-05	-2e-05		0	0
						-204.468	-161.743											0.006658	0.006658																				-69.5654	-69.5647		-2.2e-05	-2.2e-05		0	0
						-189.209	-149.536											0.006658	0.006658																				-69.2716	-69.2709		-2.5e-05	-2.5e-05		0	0
						-244.141	-216.675											0.006658	0.006658																				-68.9774	-68.9767		-2.7e-05	-2.7e-05		0	0
						-213.623	-183.105											0.006659	0.006659																				-68.6843	-68.6836		-2.9e-05	-2.9e-05		0	0
						-158.691	-198.364											0.006659	0.006659																				-68.3934	-68.3928		-3.2e-05	-3.2e-05		0	0
						-195.312	-186.157											0.00666	0.00666																				-68.1057	-68.1051		-3.4e-05	-3.4e-05		0	0
						-228.882	-164.795											0.00666	0.00666																				-67.8219	-67.8212		-3.7e-05	-3.7e-05		0	0
						-177.002	-210.571											0.00666	0.00666																				-67.5425	-67.5418		-3.9e-05	-3.9e-05		0	0
						-222.778	-180.054											0.006661	0.006661																				-67.268	-67.2673		-4.1e-05	-4.1e-05		0	0
						-210.571	-198.364											0.006661	0.006661																				-66.9987	-66.998		-4.4e-05	-4.4e-05		0	0
						-241.089	-192.261											0.006662	0.006662																				-66.7348	-66.7341		-4.6e-05	-4.6e-05		0	0
						-231.934	-134.277											0.006663	0.006663																				-66.4765	-66.4758		-4.9e-05	-4.9e-05		0	0
						-164.795	-207.52											0.006663	0.006663																				-66.2239	-66.2232		-5.1e-05	-5.1e-05		0	0
						-210.571	-137.329											0.006664	0.006664																				-65.977	-65.9764		-5.4e-05	-5.4e-05		0	0
						-204.468	-170.898											0.006664	0.006664																				-65.7359	-65.7353		-5.6e-05	-5.6e-05		0	0
						-177.002	-155.64											0.006665	0.006665																				-65.5006	-65.5		-5.8e-05	-5.8e-05		0	0
						-195.312	-149.536											0.006666	0.006666																				-65.271	-65.2704		-6.1e-05	-6.1e-05		0	0
						-170.898	-161.743											0.006666	0.006666																				-65.0471	-65.0464		-6.3e-05	-6.3e-05		0	0
						-204.468	-192.261											0.006667	0.006667																				-64.8287	-64.8281		-6.6e-05	-6.6e-05		0	0
						-152.588	-186.157											0.006668	0.006668																				-64.6159	-64.6153		-6.8e-05	-6.8e-05		0	0
						-241.089	-180.054											0.006669	0.006669																				-64.4085	-64.4079		-7e-05	-7e-05		0	0
						-250.244	-183.105											0.006669	0.006669																				-64.2064	-64.2058		-7.3e-05	-7.3e-05		0	0
						-155.64	-164.795											0.00667	0.00667																				-64.0096	-64.009		-7.5e-05	-7.5e-05		0	0
						-222.778	-219.727											0.006671	0.006671																				-63.8179	-63.8173		-7.7e-05	-7.7e-05		0	0
						-210.571	-180.054											0.006672	0.006672																				-63.6312	-63.6306		-8e-05	-8e-05		0	0
						-195.312	-183.105											0.006673	0.006673																				-63.4494	-63.4488		-8.2e-05	-8.2e-05		0	0
						-201.416	-195.312											0.006674	0.006674																				-63.2724	-63.2718		-8.4e-05	-8.4e-05		0	0
						-262.451	-195.312											0.006675	0.006675																				-63.1001	-63.0995		-8.7e-05	-8.7e-05		0	0
						-201.416	-177.002											0.006676	0.006676																				-62.9324	-62.9318		-8.9e-05	-8.9e-05		0	0
						-231.934	-204.468											0.006677	0.006677																				-62.7692	-62.7686		-9.1e-05	-9.1e-05		0	0
						-241.089	-210.571											0.006678	0.006678																				-62.6103	-62.6097		-9.3e-05	-9.3e-05		0	0
						-216.675	-170.898											0.006679	0.006679																				-62.4557	-62.4552		-9.5e-05	-9.5e-05		0	0
						-210.571	-192.261											0.00668	0.00668																				-62.3053	-62.3048		-9.7e-05	-9.7e-05		0	0
						-262.451	-183.105											0.006681	0.006681																				-62.159	-62.1584		-9.9e-05	-9.9e-05		0	0
						-241.089	-146.484											0.006682	0.006682																				-62.0167	-62.0161		-0.000101	-0.000101		0	0
						-222.778	-201.416											0.006683	0.006683																				-61.8782	-61.8777		-0.000103	-0.000103		0	0
						-225.83	-170.898											0.006684	0.006684																				-61.7436	-61.743		-0.000105	-0.000105		0	0
						-283.813	-161.743											0.006685	0.006685																				-61.6126	-61.6121		-0.000107	-0.000107		0	0
						-222.778	-201.416											0.006686	0.006686																				-61.4853	-61.4848		-0.000109	-0.000109		0	0
						-277.71	-183.105											0.006687	0.006687																				-61.3615	-61.361		-0.000111	-0.000111		0	0
						-210.571	-161.743											0.006688	0.006688																				-61.2412	-61.2406		-0.000113	-0.000113		0	0
						-234.985	-204.468											0.00669	0.00669																				-61.1242	-61.1237		-0.000115	-0.000115		0	0
						-183.105	-170.898											0.006691	0.006691																				-61.0106	-61.01		-0.000116	-0.000116		0	0
						-213.623	-161.743											0.006692	0.006692																				-60.9001	-60.8996		-0.000118	-0.000118		0	0
						-222.778	-177.002											0.006693	0.006693																				-60.7928	-60.7923		-0.00012	-0.00012		0	0
						-250.244	-170.898											0.006694	0.006694																				-60.6886	-60.688		-0.000122	-0.000122		0	0
						-225.83	-161.743											0.006696	0.006696																				-60.5873	-60.5868		-0.000123	-0.000123		0	0
						-204.468	-198.364											0.006697	0.006697																				-60.489	-60.4885		-0.000125	-0.000125		0	0
						-207.52	-173.95											0.006698	0.006698																				-60.3935	-60.393		-0.000126	-0.000126		0	0
						-180.054	-125.122											0.0067	0.0067																				-60.3008	-60.3003		-0.000128	-0.000128		0	0
						-192.261	-198.364											0.006701	0.006701																				-60.2109	-60.2104		-0.00013	-0.00013		0	0
						-225.83	-173.95											0.006702	0.006702																				-60.1236	-60.1231		-0.000131	-0.000131		0	0
						-167.847	-155.64											0.006703	0.006703																				-60.0389	-60.0384		-0.000133	-0.000133		0	0
						-189.209	-164.795											0.006705	0.006705																				-59.9567	-59.9562		-0.000134	-0.000134		0	0
						-180.054	-164.795											0.006706	0.006706																				-59.877	-59.8765		-0.000135	-0.000135		0	0
						-106.812	-170.898											0.006708	0.006708																				-59.7998	-59.7993		-0.000137	-0.000137		0	0
						-158.691	-122.07											0.006709	0.006709																				-59.7249	-59.7244		-0.000138	-0.000138		0	0
						-201.416	-167.847											0.00671	0.00671																				-59.6523	-59.6518		-0.000139	-0.000139		0	0
						-189.209	-177.002											0.006712	0.006712																				-59.5819	-59.5814		-0.000141	-0.000141		0	0
						-146.484	-158.691											0.006713	0.006713																				-59.5138	-59.5133		-0.000142	-0.000142		0	0
						-198.364	-210.571											0.006715	0.006715																				-59.4477	-59.4472		-0.000143	-0.000143		0	0
						-195.312	-180.054											0.006716	0.006716																				-59.3838	-59.3833		-0.000144	-0.000144		0	0
						-186.157	-161.743											0.006717	0.006717																				-59.322	-59.3215		-0.000146	-0.000146		0	0
						-213.623	-207.52											0.006719	0.006719																				-59.2621	-59.2616		-0.000147	-0.000147		0	0
						-164.795	-173.95											0.00672	0.00672																				-59.2042	-59.2037		-0.000148	-0.000148		0	0
						-167.847	-201.416											0.006722	0.006722																				-59.1481	-59.1477		-0.000149	-0.000149		0	0
						-225.83	-186.157											0.006723	0.006723																				-59.094	-59.0935		-0.00015	-0.00015		0	0
						-173.95	-155.64											0.006725	0.006725																				-59.0416	-59.0411		-0.000151	-0.000151		0	0
						-143.433	-173.95											0.006726	0.006726																				-58.991	-58.9906		-0.000152	-0.000152		0	0
						-265.503	-204.468											0.006728	0.006728																				-58.9422	-58.9417		-0.000153	-0.000153		0	0
						-161.743	-204.468											0.006729	0.006729																				-58.895	-58.8945		-0.000154	-0.000154		0	0
						-201.416	-186.157											0.006731	0.006731																				-58.8495	-58.849		-0.000155	-0.000155		0	0
						-222.778	-222.778											0.006732	0.006732																				-58.8055	-58.8051		-0.000156	-0.000156		0	0
						-189.209	-186.157											0.006734	0.006734																				-58.7632	-58.7627		-0.000156	-0.000156		0	0
						-225.83	-201.416											0.006735	0.006735																				-58.7224	-58.7219		-0.000157	-0.000157		0	0
						-195.312	-186.157											0.006737	0.006737																				-58.683	-58.6825		-0.000158	-0.000158		0	0
						-228.882	-198.364											0.006738	0.006738																				-58.6451	-58.6447		-0.000159	-0.000159		0	0
						-152.588	-204.468											0.00674	0.00674																				-58.6087	-58.6082		-0.00016	-0.00016		0	0
						-231.934	-259.399											0.006742	0.006742																				-58.5736	-58.5731		-0.00016	-0.00016		0	0
						-253.296	-189.209											0.006743	0.006743																				-58.5399	-58.5394		-0.000161	-0.000161		0	0
						-158.691	-204.468											0.006745	0.006745																				-58.5074	-58.507		-0.000162	-0.000162		0	0
						-259.399	-222.778											0.006746	0.006746																				-58.4763	-58.4759		-0.000163	-0.000163		0	0
						-170.898	-210.571											0.006748	0.006748																				-58.4465	-58.446		-0.000163	-0.000163		0	0
						-177.002	-180.054											0.00675	0.00675																				-58.4178	-58.4174		-0.000164	-0.000164		0	0
						-155.64	-183.105											0.006751	0.006751																				-58.3904	-58.3899		-0.000164	-0.000164		0	0
						-198.364	-195.312											0.006753	0.006753																				-58.3641	-58.3636		-0.000165	-0.000165		0	0
						-149.536	-143.433											0.006754	0.006754																				-58.3389	-58.3385		-0.000166	-0.000166		0	0
						-170.898	-183.105											0.006756	0.006756																				-58.3149	-58.3145		-0.000166	-0.000166		0	0
						-241.089	-180.054											0.006758	0.006758																				-58.292	-58.2915		-0.000167	-0.000167		0	0
						-189.209	-167.847											0.006759	0.006759																				-58.2701	-58.2696		-0.000167	-0.000167		0	0
						-238.037	-225.83											0.006761	0.006761																				-58.2492	-58.2488		-0.000168	-0.000168		0	0
						-234.985	-115.967											0.006762	0.006762																				-58.2294	-58.2289		-0.000168	-0.000168		0	0
						-158.691	-170.898											0.006764	0.006764																				-58.2105	-58.2101		-0.000169	-0.000169		0	0
						-222.778	-204.468											0.006766	0.006766																				-58.1926	-58.1922		-0.000169	-0.000169		0	0
						-149.536	-195.312											0.006767	0.006767																				-58.1756	-58.1752		-0.00017	-0.00017		0	0
						-161.743	-210.571											0.006769	0.006769																				-58.1596	-58.1591		-0.00017	-0.00017		0	0
						-189.209	-167.847											0.006771	0.006771																				-58.1444	-58.144		-0.00017	-0.00017		0	0
						-256.348	-183.105											0.006772	0.006772																				-58.1301	-58.1296		-0.000171	-0.000171		0	0
						-161.743	-173.95											0.006774	0.006774																				-58.1166	-58.1162		-0.000171	-0.000171		0	0
						-225.83	-222.778											0.006776	0.006776																				-58.104	-58.1036		-0.000171	-0.000171		0	0
						-198.364	-186.157											0.006777	0.006777																				-58.0922	-58.0917		-0.000172	-0.000172		0	0
						-173.95	-210.571											0.006779	0.006779																				-58.0811	-58.0807		-0.000172	-0.000172		0	0
						-201.416	-213.623											0.006781	0.006781																				-58.0709	-58.0704		-0.000172	-0.000172		0	0
						-228.882	-143.433											0.006782	0.006782																				-58.0613	-58.0609		-0.000173	-0.000173		0	0
						-192.261	-173.95											0.006784	0.006784																				-58.0525	-58.0521		-0.000173	-0.000173		0	0
						-219.727	-170.898											0.006786	0.006786																				-58.0445	-58.044		-0.000173	-0.000173		0	0
						-189.209	-186.157											0.006787	0.006787																				-58.0371	-58.0367		-0.000173	-0.000173		0	0
						-177.002	-192.261											0.006789	0.006789																				-58.0304	-58.0299		-0.000174	-0.000174		0	0
						-167.847	-207.52											0.006791	0.006791																				-58.0243	-58.0239		-0.000174	-0.000174		0	0
						-170.898	-164.795											0.006792	0.006792																				-58.0189	-58.0185		-0.000174	-0.000174		0	0
						-170.898	-152.588											0.006794	0.006794																				-58.0142	-58.0137		-0.000174	-0.000174		0	0
						-241.089	-173.95											0.006796	0.006796																				-58.01	-58.0096		-0.000175	-0.000175		0	0
						-161.743	-189.209											0.006798	0.006798																				-58.0064	-58.006		-0.000175	-0.000175		0	0
						-158.691	-170.898											0.006799	0.006799																				-58.0035	-58.0031		-0.000175	-0.000175		0	0
						-213.623	-177.002											0.006801	0.006801																				-58.0011	-58.0006		-0.000175	-0.000175		0	0
						-177.002	-167.847											0.006803	0.006803																				-57.9992	-57.9988		-0.000175	-0.000175		0	0
						-173.95	-146.484											0.006804	0.006804																				-57.9979	-57.9975		-0.000175	-0.000175		0	0
						-213.623	-183.105											0.006806	0.006806																				-57.9971	-57.9967		-0.000175	-0.000175		0	0
						-201.416	-155.64											0.006808	0.006808																				-57.9969	-57.9965		-0.000176	-0.000176		0	0
						-164.795	-149.536											0.006809	0.006809																				-57.9971	-57.9967		-0.000176	-0.000176		0	0
						-204.468	-210.571											0.006811	0.006811																				-57.9978	-57.9974		-0.000176	-0.000176		0	0
						-155.64	-173.95											0.006813	0.006813																				-57.999	-57.9986		-0.000176	-0.000176		0	0
						-149.536	-173.95											0.006815	0.006815																				-58.0007	-58.0003		-0.000176	-0.000176		0	0
						-173.95	-204.468											0.006816	0.006816																				-58.0028	-58.0024		-0.000176	-0.000176		0	0
						-213.623	-195.312											0.006818	0.006818																				-58.0054	-58.005		-0.000176	-0.000176		0	0
						-109.863	-164.795											0.00682	0.00682																				-58.0084	-58.008		-0.000176	-0.000176		0	0
						-173.95	-173.95											0.006822	0.006822																				-58.0118	-58.0114		-0.000176	-0.000176		0	0
						-204.468	-177.002											0.006823	0.006823																				-58.0157	-58.0152		-0.000176	-0.000176		0	0
						-201.416	-183.105											0.006825	0.006825																				-58.0199	-58.0195		-0.000176	-0.000176		0	0
						-213.623	-210.571											0.006827	0.006827																				-58.0245	-58.0241		-0.000176	-0.000176		0	0
						-170.898	-222.778											0.006828	0.006828																				-58.0295	-58.0291		-0.000176	-0.000176		0	0
						-198.364	-204.468											0.00683	0.00683																				-58.0348	-58.0344		-0.000176	-0.000176		0	0
						-207.52	-247.192											0.006832	0.006832																				-58.0405	-58.0401		-0.000176	-0.000176		0	0
						-292.969	-198.364											0.006834	0.006834																				-58.0466	-58.0462		-0.000176	-0.000176		0	0
						-94.6045	-198.364											0.006835	0.006835																				-58.053	-58.0526		-0.000176	-0.000176		0	0
						-207.52	-222.778											0.006837	0.006837																				-58.0597	-58.0593		-0.000176	-0.000176		0	0
						-207.52	-234.985											0.006839	0.006839																				-58.0667	-58.0663		-0.000176	-0.000176		0	0
						-183.105	-204.468											0.00684	0.00684																				-58.0741	-58.0737		-0.000176	-0.000176		0	0
						-201.416	-210.571											0.006842	0.006842																				-58.0817	-58.0813		-0.000176	-0.000176		0	0
						-167.847	-183.105											0.006844	0.006844																				-58.0896	-58.0892		-0.000176	-0.000176		0	0
						-152.588	-195.312											0.006846	0.006846																				-58.0979	-58.0975		-0.000176	-0.000176		0	0
						-207.52	-186.157											0.006847	0.006847																				-58.1063	-58.1059		-0.000176	-0.000176		0	0
						-198.364	-173.95											0.006849	0.006849																				-58.1151	-58.1147		-0.000176	-0.000176		0	0
						-128.174	-177.002											0.006851	0.006851																				-58.1241	-58.1237		-0.000176	-0.000176		0	0
						-186.157	-180.054											0.006853	0.006853																				-58.1333	-58.1329		-0.000176	-0.000176		0	0
						-192.261	-195.312											0.006854	0.006854																				-58.1428	-58.1424		-0.000176	-0.000176		0	0
						-155.64	-167.847											0.006856	0.006856																				-58.1525	-58.1521		-0.000176	-0.000176		0	0
						-170.898	-164.795											0.006858	0.006858																				-58.1625	-58.1621		-0.000175	-0.000175		0	0
						-192.261	-198.364											0.006859	0.00686																				-58.1726	-58.1722		-0.000175	-0.000175		0	0
						-158.691	-140.381											0.006861	0.006861																				-58.1829	-58.1825		-0.000175	-0.000175		0	0
						-167.847	-177.002											0.006863	0.006863																				-58.1935	-58.193		-0.000175	-0.000175		0	0
						-173.95	-134.277											0.006865	0.006865																				-58.2042	-58.2038		-0.000175	-0.000175		0	0
						-152.588	-173.95											0.006866	0.006866																				-58.215	-58.2146		-0.000175	-0.000175		0	0
						-158.691	-143.433											0.006868	0.006868																				-58.2261	-58.2257		-0.000175	-0.000175		0	0
						-210.571	-164.795											0.00687	0.00687																				-58.2373	-58.2369		-0.000175	-0.000175		0	0
						-173.95	-91.5527											0.006872	0.006872																				-58.2486	-58.2482		-0.000175	-0.000175		0	0
						-140.381	-167.847											0.006873	0.006873																				-58.26	-58.2596		-0.000175	-0.000175		0	0
						-195.312	-177.002											0.006875	0.006875																				-58.2716	-58.2712		-0.000174	-0.000174		0	0
						-131.226	-170.898											0.006877	0.006877																				-58.2833	-58.2829		-0.000174	-0.000174		0	0
						-183.105	-222.778											0.006879	0.006879																				-58.2951	-58.2947		-0.000174	-0.000174		0	0
						-201.416	-177.002											0.00688	0.00688																				-58.3069	-58.3065		-0.000174	-0.000174		0	0
						-180.054	-186.157											0.006882	0.006882																				-58.3188	-58.3184		-0.000174	-0.000174		0	0
						-161.743	-173.95											0.006884	0.006884																				-58.3308	-58.3304		-0.000174	-0.000174		0	0
						-228.882	-152.588											0.006885	0.006885																				-58.3428	-58.3424		-0.000174	-0.000174		0	0
						-152.588	-134.277											0.006887	0.006887																				-58.3549	-58.3545		-0.000173	-0.000173		0	0
						-189.209	-192.261											0.006889	0.006889																				-58.3669	-58.3665		-0.000173	-0.000173		0	0
						-177.002	-149.536											0.006891	0.006891																				-58.379	-58.3785		-0.000173	-0.000173		0	0
						-195.312	-134.277											0.006892	0.006892																				-58.391	-58.3906		-0.000173	-0.000173		0	0
						-103.76	-189.209											0.006894	0.006894																				-58.4029	-58.4025		-0.000173	-0.000173		0	0
						-198.364	-155.64											0.006896	0.006896																				-58.4149	-58.4144		-0.000173	-0.000173		0	0
						-189.209	-161.743											0.006898	0.006898																				-58.4267	-58.4263		-0.000173	-0.000173		0	0
						-192.261	-192.261											0.006899	0.006899																				-58.4384	-58.438		-0.000172	-0.000172		0	0
						-186.157	-180.054											0.006901	0.006901																				-58.45	-58.4496		-0.000172	-0.000172		0	0
						-177.002	-155.64											0.006903	0.006903																				-58.4615	-58.4611		-0.000172	-0.000172		0	0
						-146.484	-219.727											0.006904	0.006904																				-58.4728	-58.4724		-0.000172	-0.000172		0	0
						-244.141	-186.157											0.006906	0.006906																				-58.484	-58.4836		-0.000172	-0.000172		0	0
						-222.778	-186.157											0.006908	0.006908																				-58.4949	-58.4945		-0.000172	-0.000172		0	0
						-195.312	-222.778											0.00691	0.00691																				-58.5057	-58.5053		-0.000172	-0.000172		0	0
						-268.555	-192.261											0.006911	0.006911																				-58.5162	-58.5157		-0.000171	-0.000171		0	0
						-228.882	-167.847											0.006913	0.006913																				-58.5264	-58.526		-0.000171	-0.000171		0	0
						-210.571	-198.364											0.006915	0.006915																				-58.5364	-58.536		-0.000171	-0.000171		0	0
						-256.348	-210.571											0.006917	0.006917																				-58.546	-58.5456		-0.000171	-0.000171		0	0
						-192.261	-180.054											0.006918	0.006918																				-58.5554	-58.555		-0.000171	-0.000171		0	0
						-167.847	-216.675											0.00692	0.00692																				-58.5644	-58.564		-0.000171	-0.000171		0	0
						-186.157	-201.416											0.006922	0.006922																				-58.5731	-58.5727		-0.000171	-0.000171		0	0
						-164.795	-189.209											0.006923	0.006923																				-58.5815	-58.5811		-0.00017	-0.00017		0	0
						-201.416	-180.054											0.006925	0.006925																				-58.5894	-58.5891		-0.00017	-0.00017		0	0
						-225.83	-222.778											0.006927	0.006927																				-58.597	-58.5967		-0.00017	-0.00017		0	0
						-170.898	-183.105											0.006929	0.006929																				-58.6042	-58.6039		-0.00017	-0.00017		0	0
						-189.209	-228.882											0.00693	0.00693																				-58.611	-58.6107		-0.00017	-0.00017		0	0
						-244.141	-234.985											0.006932	0.006932																				-58.6174	-58.6171		-0.00017	-0.00017		0	0
						-173.95	-164.795											0.006934	0.006934																				-58.6234	-58.6231		-0.00017	-0.00017		0	0
						-180.054	-180.054											0.006936	0.006936																				-58.629	-58.6287		-0.00017	-0.00017		0	0
						-204.468	-228.882											0.006937	0.006937																				-58.6342	-58.6339		-0.00017	-0.00017		0	0
						-231.934	-177.002											0.006939	0.006939																				-58.639	-58.6387		-0.000169	-0.000169		0	0
						-183.105	-170.898											0.006941	0.006941																				-58.6433	-58.6431		-0.000169	-0.000169		0	0
						-210.571	-204.468											0.006942	0.006942																				-58.6473	-58.6471		-0.000169	-0.000169		0	0
						-180.054	-186.157											0.006944	0.006944																				-58.651	-58.6508		-0.000169	-0.000169		0	0
						-158.691	-155.64											0.006946	0.006946																				-58.6542	-58.6541		-0.000169	-0.000169		0	0
						-219.727	-167.847											0.006948	0.006948																				-58.6571	-58.657		-0.000169	-0.000169		0	0
						-201.416	-183.105											0.006949	0.006949																				-58.6597	-58.6597		-0.000169	-0.000169		0	0
						-152.588	-146.484											0.006951	0.006951																				-58.662	-58.662		-0.000169	-0.000169		0	0
						-186.157	-210.571											0.006953	0.006953																				-58.664	-58.6641		-0.000169	-0.000169		0	0
						-109.863	-158.691											0.006955	0.006955																				-58.6657	-58.6658		-0.000169	-0.000169		0	0
						-189.209	-146.484											0.006956	0.006956																				-58.6672	-58.6674		-0.000169	-0.000169		0	0
						-164.795	-192.261											0.006958	0.006958																				-58.6685	-58.6688		-0.000168	-0.000168		0	0
						-180.054	-149.536											0.00696	0.00696																				-58.6696	-58.67		-0.000168	-0.000168		0	0
						-137.329	-119.019											0.006961	0.006961																				-58.6706	-58.671		-0.000168	-0.000168		0	0
						-186.157	-161.743											0.006963	0.006963																				-58.6714	-58.672		-0.000168	-0.000168		0	0
						-164.795	-164.795											0.006965	0.006965																				-58.6722	-58.6728		-0.000168	-0.000168		0	0
						-161.743	-177.002											0.006967	0.006967																				-58.6729	-58.6736		-0.000168	-0.000168		0	0
						-204.468	-170.898											0.006968	0.006968																				-58.6735	-58.6743		-0.000168	-0.000168		0	0
						-161.743	-161.743											0.00697	0.00697																				-58.6741	-58.6751		-0.000168	-0.000168		0	0
						-155.64	-170.898											0.006972	0.006972																				-58.6747	-58.6758		-0.000168	-0.000168		0	0
						-207.52	-143.433											0.006974	0.006974																				-58.6753	-58.6765		-0.000168	-0.000168		0	0
						-183.105	-170.898											0.006975	0.006975																				-58.676	-58.6773		-0.000168	-0.000168		0	0
						-186.157	-161.743											0.006977	0.006977																				-58.6766	-58.6782		-0.000168	-0.000168		0	0
						-177.002	-173.95											0.006979	0.006979																				-58.6774	-58.6791		-0.000168	-0.000168		0	0
						-241.089	-161.743											0.006981	0.006981																				-58.6782	-58.6801		-0.000167	-0.000167		0	0
						-164.795	-180.054											0.006982	0.006982																				-58.679	-58.6811		-0.000167	-0.000167		0	0
						-195.312	-173.95											0.006984	0.006984																				-58.6799	-58.6822		-0.000167	-0.000167		0	0
						-189.209	-170.898											0.006986	0.006986																				-58.6808	-58.6833		-0.000167	-0.000167		0	0
						-167.847	-180.054											0.006988	0.006988																				-58.6818	-58.6845		-0.000167	-0.000167		0	0
						-180.054	-158.691											0.006989	0.006989																				-58.6827	-58.6857		-0.000167	-0.000167		0	0
						-192.261	-149.536											0.006991	0.006991																				-58.6837	-58.6869		-0.000167	-0.000167		0	0
						-149.536	-192.261											0.006993	0.006993																				-58.6846	-58.688		-0.000167	-0.000167		0	0
						-198.364	-198.364											0.006995	0.006995																				-58.6854	-58.6891		-0.000167	-0.000167		0	0
						-225.83	-155.64											0.006996	0.006996																				-58.6861	-58.6901		-0.000167	-0.000167		0	0
						-177.002	-158.691											0.006998	0.006998																				-58.6867	-58.6909		-0.000167	-0.000167		0	0
						-244.141	-204.468											0.007	0.007																				-58.687	-58.6916		-0.000167	-0.000167		0	0
						-219.727	-204.468											0.007002	0.007002																				-58.6872	-58.6921		-0.000166	-0.000166		0	0
						-149.536	-198.364											0.007003	0.007003																				-58.6871	-58.6923		-0.000166	-0.000166		0	0
						-219.727	-189.209											0.007005	0.007005																				-58.6867	-58.6922		-0.000166	-0.000166		0	0
						-241.089	-204.468											0.007007	0.007007																				-58.686	-58.6919		-0.000166	-0.000166		0	0
						-210.571	-198.364											0.007008	0.007008																				-58.6849	-58.6911		-0.000166	-0.000166		0	0
						-186.157	-244.141											0.00701	0.00701																				-58.6834	-58.69		-0.000166	-0.000166		0	0
						-225.83	-183.105											0.007012	0.007012																				-58.6814	-58.6884		-0.000166	-0.000166		0	0
						-158.691	-207.52											0.007014	0.007014																				-58.6791	-58.6865		-0.000166	-0.000166		0	0
						-219.727	-234.985											0.007015	0.007015																				-58.6762	-58.684		-0.000166	-0.000166		0	0
						-210.571	-173.95											0.007017	0.007017																				-58.6728	-58.6811		-0.000166	-0.000166		0	0
						-180.054	-167.847											0.007019	0.007019																				-58.669	-58.6776		-0.000166	-0.000166		0	0
						-173.95	-195.312											0.007021	0.007021																				-58.6646	-58.6737		-0.000166	-0.000166		0	0
						-167.847	-198.364											0.007022	0.007022																				-58.6597	-58.6693		-0.000166	-0.000166		0	0
						-164.795	-183.105											0.007024	0.007024																				-58.6543	-58.6644		-0.000166	-0.000166		0	0
						-183.105	-213.623											0.007026	0.007026																				-58.6484	-58.659		-0.000166	-0.000166		0	0
						-186.157	-219.727											0.007028	0.007028																				-58.642	-58.6531		-0.000166	-0.000166		0	0
						-119.019	-207.52											0.007029	0.007029																				-58.6352	-58.6468		-0.000166	-0.000166		0	0
						-213.623	-225.83											0.007031	0.007031																				-58.628	-58.6401		-0.000166	-0.000166		0	0
						-164.795	-213.623											0.007033	0.007033																				-58.6204	-58.6331		-0.000166	-0.000166		0	0
						-170.898	-198.364											0.007035	0.007035																				-58.6124	-58.6257		-0.000166	-0.000166		0	0
						-180.054	-234.985											0.007037	0.007037																				-58.6041	-58.618		-0.000166	-0.000166		0	0
						-213.623	-207.52											0.007038	0.007038																				-58.5956	-58.6101		-0.000166	-0.000166		0	0
						-128.174	-167.847											0.00704	0.00704																				-58.5869	-58.602		-0.000166	-0.000165		0	0
						-164.795	-231.934											0.007042	0.007042																				-58.578	-58.5937		-0.000166	-0.000165		0	0
						-143.433	-195.312											0.007044	0.007044																				-58.5691	-58.5854		-0.000166	-0.000165		0	0
						-180.054	-152.588											0.007045	0.007045																				-58.5601	-58.5771		-0.000166	-0.000165		0	0
						-207.52	-189.209											0.007047	0.007047																				-58.5511	-58.5688		-0.000166	-0.000165		0	0
						-161.743	-186.157											0.007049	0.007049																				-58.5423	-58.5606		-0.000166	-0.000165		0	0
						-131.226	-170.898											0.007051	0.007051																				-58.5336	-58.5526		-0.000166	-0.000165		0	0
						-234.985	-158.691											0.007052	0.007052																				-58.5251	-58.5448		-0.000166	-0.000165		0	0
						-216.675	-170.898											0.007054	0.007054																				-58.5169	-58.5373		-0.000166	-0.000165		0	0
						-167.847	-146.484											0.007056	0.007056																				-58.5091	-58.5301		-0.000166	-0.000165		0	0
						-167.847	-155.64											0.007058	0.007058																				-58.5017	-58.5234		-0.000166	-0.000165		0	0
						-219.727	-152.588											0.00706	0.007059																				-58.4947	-58.5172		-0.000166	-0.000165		0	0
						-183.105	-195.312											0.007061	0.007061																				-58.4883	-58.5114		-0.000166	-0.000165		0	0
						-204.468	-164.795											0.007063	0.007063																				-58.4824	-58.5063		-0.000166	-0.000165		0	0
						-180.054	-180.054											0.007065	0.007065																				-58.4771	-58.5018		-0.000166	-0.000165		0	0
						-173.95	-112.915											0.007067	0.007067																				-58.4726	-58.4979		-0.000165	-0.000165		0	0
						-183.105	-180.054											0.007068	0.007068																				-58.4687	-58.4948		-0.000165	-0.000165		0	0
						-189.209	-167.847											0.00707	0.00707																				-58.4656	-58.4924		-0.000165	-0.000165		0	0
						-195.312	-161.743											0.007072	0.007072																				-58.4633	-58.4908		-0.000165	-0.000165		0	0
						-204.468	-198.364											0.007074	0.007074																				-58.4618	-58.4901		-0.000165	-0.000165		0	0
						-213.623	-189.209											0.007076	0.007075																				-58.4611	-58.4901		-0.000165	-0.000165		0	0
						-155.64	-195.312											0.007077	0.007077																				-58.4613	-58.4911		-0.000165	-0.000165		0	0
						-198.364	-219.727											0.007079	0.007079																				-58.4624	-58.4929		-0.000165	-0.000165		0	0
						-183.105	-161.743											0.007081	0.007081																				-58.4644	-58.4956		-0.000165	-0.000165		0	0
						-234.985	-192.261											0.007083	0.007083																				-58.4673	-58.4992		-0.000165	-0.000165		0	0
						-250.244	-177.002											0.007084	0.007084																				-58.4711	-58.5037		-0.000165	-0.000164		0	0
						-253.296	-234.985											0.007086	0.007086																				-58.4758	-58.5091		-0.000165	-0.000164		0	0
						-192.261	-167.847											0.007088	0.007088																				-58.4814	-58.5154		-0.000165	-0.000164		0	0
						-180.054	-161.743											0.00709	0.00709																				-58.4879	-58.5226		-0.000164	-0.000164		0	0
						-222.778	-219.727											0.007092	0.007091																				-58.4954	-58.5307		-0.000164	-0.000164		0	0
						-164.795	-167.847											0.007093	0.007093																				-58.5037	-58.5397		-0.000164	-0.000164		0	0
						-189.209	-216.675											0.007095	0.007095																				-58.5128	-58.5495		-0.000164	-0.000164		0	0
						-225.83	-186.157											0.007097	0.007097																				-58.5228	-58.5601		-0.000164	-0.000163		0	0
						-198.364	-158.691											0.007099	0.007099																				-58.5337	-58.5716		-0.000164	-0.000163		0	0
						-222.778	-164.795											0.0071	0.0071																				-58.5453	-58.5838		-0.000163	-0.000163		0	0
						-198.364	-256.348											0.007102	0.007102																				-58.5577	-58.5969		-0.000163	-0.000163		0	0
						-177.002	-158.691											0.007104	0.007104																				-58.5709	-58.6106		-0.000163	-0.000163		0	0
						-180.054	-219.727											0.007106	0.007106																				-58.5848	-58.6251		-0.000163	-0.000163		0	0
						-225.83	-180.054											0.007107	0.007107																				-58.5994	-58.6402		-0.000163	-0.000162		0	0
						-180.054	-219.727											0.007109	0.007109																				-58.6146	-58.656		-0.000162	-0.000162		0	0
						-189.209	-183.105											0.007111	0.007111																				-58.6305	-58.6725		-0.000162	-0.000162		0	0
						-225.83	-207.52											0.007113	0.007113																				-58.647	-58.6895		-0.000162	-0.000162		0	0
						-201.416	-143.433											0.007115	0.007114																				-58.6642	-58.7071		-0.000162	-0.000161		0	0
						-155.64	-164.795											0.007116	0.007116																				-58.6818	-58.7253		-0.000162	-0.000161		0	0
						-228.882	-195.312											0.007118	0.007118																				-58.7	-58.744		-0.000161	-0.000161		0	0
						-213.623	-155.64											0.00712	0.00712																				-58.7187	-58.7631		-0.000161	-0.000161		0	0
						-192.261	-198.364											0.007122	0.007121																				-58.7378	-58.7827		-0.000161	-0.00016		0	0
						-207.52	-173.95											0.007123	0.007123																				-58.7574	-58.8028		-0.000161	-0.00016		0	0
						-180.054	-161.743											0.007125	0.007125																				-58.7774	-58.8232		-0.00016	-0.00016		0	0
						-158.691	-192.261											0.007127	0.007127																				-58.7978	-58.844		-0.00016	-0.00016		0	0
						-210.571	-152.588											0.007129	0.007128																				-58.8185	-58.8652		-0.00016	-0.000159		0	0
						-219.727	-161.743											0.00713	0.00713																				-58.8395	-58.8866		-0.00016	-0.000159		0	0
						-216.675	-180.054											0.007132	0.007132																				-58.8609	-58.9084		-0.000159	-0.000159		0	0
						-222.778	-213.623											0.007134	0.007134																				-58.8825	-58.9304		-0.000159	-0.000159		0	0
						-256.348	-192.261											0.007136	0.007135																				-58.9044	-58.9527		-0.000159	-0.000158		0	0
						-192.261	-219.727											0.007137	0.007137																				-58.9266	-58.9752		-0.000159	-0.000158		0	0
						-228.882	-234.985											0.007139	0.007139																				-58.9489	-58.9979		-0.000158	-0.000158		0	0
						-207.52	-158.691											0.007141	0.007141																				-58.9714	-59.0208		-0.000158	-0.000158		0	0
						-201.416	-192.261											0.007143	0.007142																				-58.9941	-59.0438		-0.000158	-0.000157		0	0
						-238.037	-192.261											0.007144	0.007144																				-59.0169	-59.067		-0.000157	-0.000157		0	0
						-259.399	-189.209											0.007146	0.007146																				-59.0398	-59.0903		-0.000157	-0.000157		0	0
						-180.054	-186.157											0.007148	0.007148																				-59.0629	-59.1136		-0.000157	-0.000157		0	0
						-259.399	-186.157											0.007149	0.007149																				-59.086	-59.1371		-0.000157	-0.000156		0	0
						-192.261	-177.002											0.007151	0.007151																				-59.1092	-59.1606		-0.000156	-0.000156		0	0
						-222.778	-164.795											0.007153	0.007153																				-59.1324	-59.1842		-0.000156	-0.000156		0	0
						-210.571	-247.192											0.007155	0.007154																				-59.1556	-59.2077		-0.000156	-0.000155		0	0
						-219.727	-149.536											0.007156	0.007156																				-59.1789	-59.2313		-0.000156	-0.000155		0	0
						-164.795	-155.64											0.007158	0.007158																				-59.2022	-59.2549		-0.000155	-0.000155		0	0
						-210.571	-195.312											0.00716	0.00716																				-59.2254	-59.2784		-0.000155	-0.000155		0	0
						-195.312	-189.209											0.007162	0.007161																				-59.2486	-59.3019		-0.000155	-0.000154		0	0
						-183.105	-186.157											0.007163	0.007163																				-59.2717	-59.3254		-0.000154	-0.000154		0	0
						-204.468	-198.364											0.007165	0.007165																				-59.2948	-59.3488		-0.000154	-0.000154		0	0
						-204.468	-192.261											0.007167	0.007166																				-59.3178	-59.3721		-0.000154	-0.000154		0	0
						-207.52	-125.122											0.007168	0.007168																				-59.3408	-59.3953		-0.000154	-0.000153		0	0
						-247.192	-192.261											0.00717	0.00717																				-59.3636	-59.4184		-0.000153	-0.000153		0	0
						-247.192	-143.433											0.007172	0.007172																				-59.3863	-59.4414		-0.000153	-0.000153		0	0
						-164.795	-195.312											0.007174	0.007173																				-59.4089	-59.4642		-0.000153	-0.000152		0	0
						-274.658	-207.52											0.007175	0.007175																				-59.4313	-59.487		-0.000153	-0.000152		0	0
						-280.762	-238.037											0.007177	0.007177																				-59.4536	-59.5095		-0.000152	-0.000152		0	0
						-225.83	-170.898											0.007179	0.007178																				-59.4758	-59.532		-0.000152	-0.000152		0	0
						-277.71	-213.623											0.00718	0.00718																				-59.4978	-59.5542		-0.000152	-0.000151		0	0
						-253.296	-189.209											0.007182	0.007182																				-59.5196	-59.5763		-0.000152	-0.000151		0	0
						-201.416	-167.847											0.007184	0.007183																				-59.5413	-59.5983		-0.000151	-0.000151		0	0
						-265.503	-183.105											0.007185	0.007185																				-59.5627	-59.62		-0.000151	-0.000151		0	0
						-195.312	-183.105											0.007187	0.007187																				-59.584	-59.6416		-0.000151	-0.00015		0	0
						-177.002	-186.157											0.007189	0.007188																				-59.6051	-59.663		-0.000151	-0.00015		0	0
						-198.364	-173.95											0.00719	0.00719																				-59.6261	-59.6841		-0.00015	-0.00015		0	0
						-241.089	-167.847											0.007192	0.007192																				-59.6468	-59.7051		-0.00015	-0.00015		0	0
						-167.847	-164.795											0.007194	0.007194																				-59.6673	-59.7259		-0.00015	-0.000149		0	0
						-210.571	-183.105											0.007196	0.007195																				-59.6876	-59.7465		-0.00015	-0.000149		0	0
						-183.105	-180.054											0.007197	0.007197																				-59.7078	-59.7669		-0.000149	-0.000149		0	0
						-146.484	-177.002											0.007199	0.007199																				-59.7277	-59.7872		-0.000149	-0.000149		0	0
						-219.727	-195.312											0.007201	0.0072																				-59.7475	-59.8072		-0.000149	-0.000148		0	0
						-155.64	-134.277											0.007202	0.007202																				-59.767	-59.827		-0.000149	-0.000148		0	0
						-186.157	-177.002											0.007204	0.007204																				-59.7864	-59.8466		-0.000148	-0.000148		0	0
						-164.795	-164.795											0.007206	0.007205																				-59.8055	-59.8661		-0.000148	-0.000148		0	0
						-204.468	-167.847											0.007207	0.007207																				-59.8245	-59.8853		-0.000148	-0.000147		0	0
						-164.795	-192.261											0.007209	0.007209																				-59.8433	-59.9044		-0.000148	-0.000147		0	0
						-177.002	-161.743											0.007211	0.00721																				-59.8619	-59.9233		-0.000148	-0.000147		0	0
						-225.83	-195.312											0.007212	0.007212																				-59.8803	-59.942		-0.000147	-0.000147		0	0
						-161.743	-164.795											0.007214	0.007214																				-59.8986	-59.9605		-0.000147	-0.000147		0	0
						-192.261	-186.157											0.007216	0.007215																				-59.9167	-59.9789		-0.000147	-0.000146		0	0
						-210.571	-186.157											0.007217	0.007217																				-59.9346	-59.9972		-0.000147	-0.000146		0	0
						-125.122	-189.209											0.007219	0.007219																				-59.9524	-60.0153		-0.000146	-0.000146		0	0
						-161.743	-183.105											0.007221	0.00722																				-59.9701	-60.0332		-0.000146	-0.000146		0	0
						-225.83	-173.95											0.007222	0.007222																				-59.9876	-60.051		-0.000146	-0.000146		0	0
						-137.329	-164.795											0.007224	0.007224																				-60.0049	-60.0687		-0.000146	-0.000145		0	0
						-164.795	-164.795											0.007226	0.007225																				-60.0222	-60.0862		-0.000146	-0.000145		0	0
						-213.623	-158.691											0.007227	0.007227																				-60.0393	-60.1037		-0.000145	-0.000145		0	0
						-158.691	-167.847											0.007229	0.007229																				-60.0563	-60.121		-0.000145	-0.000145		0	0
						-195.312	-173.95											0.007231	0.00723																				-60.0732	-60.1383		-0.000145	-0.000144		0	0
						-219.727	-189.209											0.007232	0.007232																				-60.09	-60.1554		-0.000145	-0.000144		0	0
						-170.898	-189.209											0.007234	0.007234																				-60.1067	-60.1725		-0.000145	-0.000144		0	0
						-177.002	-247.192											0.007236	0.007235																				-60.1233	-60.1894		-0.000144	-0.000144		0	0
						-180.054	-210.571											0.007237	0.007237																				-60.1399	-60.2063		-0.000144	-0.000144		0	0
						-173.95	-231.934											0.007239	0.007239																				-60.1564	-60.2232		-0.000144	-0.000143		0	0
						-192.261	-228.882											0.007241	0.00724																				-60.1728	-60.24		-0.000144	-0.000143		0	0
						-250.244	-204.468											0.007242	0.007242																				-60.1892	-60.2567		-0.000144	-0.000143		0	0
						-186.157	-192.261											0.007244	0.007244																				-60.2055	-60.2734		-0.000143	-0.000143		0	0
						-170.898	-234.985											0.007246	0.007245																				-60.2217	-60.2901		-0.000143	-0.000143		0	0
						-216.675	-183.105											0.007247	0.007247																				-60.238	-60.3067		-0.000143	-0.000142		0	0
						-210.571	-222.778											0.007249	0.007248																				-60.2542	-60.3233		-0.000143	-0.000142		0	0
						-238.037	-180.054											0.007251	0.00725																				-60.2704	-60.3399		-0.000143	-0.000142		0	0
						-189.209	-189.209											0.007252	0.007252																				-60.2865	-60.3565		-0.000142	-0.000142		0	0
						-170.898	-152.588											0.007254	0.007253																				-60.3027	-60.373		-0.000142	-0.000142		0	0
						-207.52	-189.209											0.007256	0.007255																				-60.3188	-60.3896		-0.000142	-0.000141		0	0
						-213.623	-177.002											0.007257	0.007257																				-60.3349	-60.4061		-0.000142	-0.000141		0	0
						-201.416	-170.898											0.007259	0.007258																				-60.3511	-60.4227		-0.000142	-0.000141		0	0
						-198.364	-149.536											0.007261	0.00726																				-60.3672	-60.4393		-0.000141	-0.000141		0	0
						-177.002	-158.691											0.007262	0.007262																				-60.3834	-60.4559		-0.000141	-0.000141		0	0
						-189.209	-119.019											0.007264	0.007263																				-60.3995	-60.4725		-0.000141	-0.00014		0	0
						-158.691	-152.588											0.007265	0.007265																				-60.4157	-60.4891		-0.000141	-0.00014		0	0
						-158.691	-180.054											0.007267	0.007267																				-60.4319	-60.5058		-0.000141	-0.00014		0	0
						-222.778	-146.484											0.007269	0.007268																				-60.4481	-60.5225		-0.00014	-0.00014		0	0
						-177.002	-137.329											0.00727	0.00727																				-60.4644	-60.5392		-0.00014	-0.00014		0	0
						-210.571	-170.898											0.007272	0.007271																				-60.4807	-60.556		-0.00014	-0.000139		0	0
						-210.571	-189.209											0.007274	0.007273																				-60.497	-60.5727		-0.00014	-0.000139		0	0
						-210.571	-152.588											0.007275	0.007275																				-60.5133	-60.5896		-0.00014	-0.000139		0	0
						-177.002	-173.95											0.007277	0.007276																				-60.5297	-60.6064		-0.000139	-0.000139		0	0
						-189.209	-146.484											0.007279	0.007278																				-60.4842	-60.5614		-0.000143	-0.000143		0	0
						-189.209	-170.898											0.00728	0.00728																				-60.3915	-60.469		-0.000148	-0.000147		0	0
						-268.555	-146.484											0.007282	0.007281																				-60.2618	-60.3395		-0.000152	-0.000152		0	0
						-177.002	-164.795											0.007284	0.007283																				-60.1031	-60.1812		-0.000157	-0.000156		0	0
						-204.468	-143.433											0.007286	0.007285																				-59.9222	-60.0005		-0.000162	-0.000161		0	0
						-192.261	-183.105											0.007288	0.007287																				-59.7245	-59.8029		-0.000167	-0.000167		0	0
						-158.691	-106.812											0.00729	0.007289																				-59.5144	-59.593		-0.000173	-0.000172		0	0
						-180.054	-192.261											0.007292	0.007291																				-59.2955	-59.3742		-0.000178	-0.000177		0	0
						-195.312	-213.623											0.007294	0.007293																				-59.0708	-59.1497		-0.000184	-0.000183		0	0
						-131.226	-161.743											0.007296	0.007296																				-58.8426	-58.9217		-0.000189	-0.000189		0	0
						-201.416	-158.691											0.007299	0.007298																				-58.613	-58.6921		-0.000195	-0.000194		0	0
						-241.089	-195.312											0.007301	0.0073																				-58.3834	-58.4627		-0.000201	-0.0002		0	0
						-189.209	-192.261											0.007304	0.007303																				-58.1552	-58.2345		-0.000207	-0.000206		0	0
						-170.898	-164.795											0.007306	0.007305																				-57.9292	-58.0086		-0.000212	-0.000212		0	0
						-216.675	-201.416											0.007309	0.007308																				-57.7062	-57.7857		-0.000218	-0.000217		0	0
						-131.226	-161.743											0.007311	0.007311																				-57.487	-57.5665		-0.000224	-0.000223		0	0
						-192.261	-192.261											0.007314	0.007313																				-57.2718	-57.3515		-0.00023	-0.000229		0	0
						-253.296	-167.847											0.007317	0.007316																				-57.0611	-57.1409		-0.000235	-0.000234		0	0
						-137.329	-149.536											0.00732	0.007319																				-56.8551	-56.935		-0.000241	-0.00024		0	0
						-204.468	-216.675											0.007323	0.007322																				-56.654	-56.7339		-0.000247	-0.000245		0	0
						-173.95	-183.105											0.007325	0.007325																				-56.4579	-56.5379		-0.000252	-0.000251		0	0
						-177.002	-216.675											0.007328	0.007328																				-56.2668	-56.3469		-0.000258	-0.000256		0	0
						-167.847	-164.795											0.007332	0.007331																				-56.0808	-56.161		-0.000263	-0.000262		0	0
						-170.898	-204.468											0.007335	0.007334																				-55.8998	-55.9801		-0.000268	-0.000267		0	0
						-152.588	-146.484											0.007338	0.007337																				-55.7237	-55.8041		-0.000274	-0.000272		0	0
						-161.743	-170.898											0.007341	0.00734																				-55.5525	-55.6331		-0.000279	-0.000278		0	0
						-170.898	-173.95											0.007344	0.007343																				-55.3861	-55.4669		-0.000284	-0.000283		0	0
						-155.64	-146.484											0.007348	0.007347																				-55.2243	-55.3053		-0.000289	-0.000288		0	0
						-143.433	-125.122											0.007351	0.00735																				-55.0672	-55.1483		-0.000294	-0.000293		0	0
						-170.898	-201.416											0.007354	0.007354																				-54.9144	-54.9958		-0.000299	-0.000298		0	0
						-207.52	-158.691											0.007358	0.007357																				-54.7659	-54.8476		-0.000304	-0.000302		0	0
						-177.002	-173.95											0.007361	0.00736																				-54.6215	-54.7035		-0.000308	-0.000307		0	0
						-213.623	-204.468											0.007365	0.007364																				-54.4811	-54.5634		-0.000313	-0.000312		0	0
						-192.261	-177.002											0.007368	0.007368																				-54.3446	-54.4272		-0.000318	-0.000316		0	0
						-192.261	-177.002											0.007372	0.007371																				-54.2117	-54.2948		-0.000322	-0.000321		0	0
						-210.571	-198.364											0.007376	0.007375																				-54.0823	-54.1659		-0.000326	-0.000325		0	0
						-250.244	-170.898											0.007379	0.007378																				-53.9563	-54.0404		-0.000331	-0.000329		0	0
						-244.141	-164.795											0.007383	0.007382																				-53.8335	-53.9182		-0.000335	-0.000334		0	0
						-256.348	-195.312											0.007387	0.007386																				-53.7138	-53.799		-0.000339	-0.000338		0	0
						-241.089	-170.898											0.007391	0.00739																				-53.597	-53.6829		-0.000343	-0.000342		0	0
						-231.934	-207.52											0.007395	0.007394																				-53.4829	-53.5695		-0.000347	-0.000346		0	0
						-207.52	-207.52											0.007398	0.007397																				-53.3714	-53.4588		-0.000351	-0.00035		0	0
						-201.416	-158.691											0.007402	0.007401																				-53.2623	-53.3507		-0.000355	-0.000354		0	0
						-192.261	-207.52											0.007406	0.007405																				-53.1555	-53.2449		-0.000359	-0.000358		0	0
						-189.209	-189.209											0.00741	0.007409																				-53.0508	-53.1413		-0.000363	-0.000361		0	0
						-158.691	-183.105											0.007414	0.007413																				-52.9481	-53.0397		-0.000367	-0.000365		0	0
						-173.95	-180.054											0.007418	0.007417																				-52.8473	-52.9401		-0.00037	-0.000369		0	0
						-180.054	-210.571											0.007422	0.007421																				-52.748	-52.8423		-0.000374	-0.000372		0	0
						-183.105	-183.105											0.007426	0.007425																				-52.6503	-52.7461		-0.000377	-0.000376		0	0
						-131.226	-207.52											0.007431	0.007429																				-52.5539	-52.6514		-0.000381	-0.000379		0	0
						-189.209	-164.795											0.007435	0.007434																				-52.4587	-52.5579		-0.000384	-0.000382		0	0
						-198.364	-204.468											0.007439	0.007438																				-52.3645	-52.4657		-0.000388	-0.000386		0	0
						-189.209	-161.743											0.007443	0.007442																				-52.2711	-52.3745		-0.000391	-0.000389		0	0
						-234.985	-204.468											0.007447	0.007446																				-52.1784	-52.2841		-0.000395	-0.000392		0	0
						-259.399	-204.468											0.007452	0.00745																				-52.0862	-52.1944		-0.000398	-0.000396		0	0
						-177.002	-189.209											0.007456	0.007455																				-51.9943	-52.1052		-0.000401	-0.000399		0	0
						-198.364	-204.468											0.00746	0.007459																				-51.9025	-52.0164		-0.000404	-0.000402		0	0
						-177.002	-155.64											0.007465	0.007463																				-51.8106	-51.9277		-0.000408	-0.000405		0	0
						-155.64	-161.743											0.007469	0.007468																				-51.7184	-51.8391		-0.000411	-0.000408		0	0
						-195.312	-210.571											0.007474	0.007472																				-51.6257	-51.7502		-0.000414	-0.000411		0	0
						-186.157	-173.95											0.007478	0.007477																				-51.5322	-51.6609		-0.000417	-0.000414		0	0
						-109.863	-158.691											0.007482	0.007481																				-51.4378	-51.571		-0.00042	-0.000418		0	0
						-231.934	-189.209											0.007487	0.007485																				-51.3423	-51.4802		-0.000423	-0.000421		0	0
						-173.95	-180.054											0.007491	0.00749																				-51.2453	-51.3884		-0.000427	-0.000424		0	0
						-195.312	-155.64											0.007496	0.007494																				-51.1466	-51.2953		-0.00043	-0.000427		0	0
						-167.847	-167.847											0.007501	0.007499																				-51.0459	-51.2007		-0.000433	-0.00043		0	0
						-186.157	-125.122											0.007505	0.007504																				-50.9431	-51.1042		-0.000436	-0.000433		0	0
						-161.743	-143.433											0.00751	0.007508																				-50.8378	-51.0058		-0.00044	-0.000436		0	0
						-219.727	-180.054											0.007515	0.007513																				-50.7298	-50.905		-0.000443	-0.000439		0	0
						-164.795	-161.743											0.007519	0.007518																				-50.6188	-50.8017		-0.000446	-0.000442		0	0
						-152.588	-180.054											0.007524	0.007522																				-50.5046	-50.6956		-0.00045	-0.000446		0	0
						-195.312	-192.261											0.007529	0.007527																				-50.3868	-50.5864		-0.000453	-0.000449		0	0
						-216.675	-195.312											0.007534	0.007532																				-50.2652	-50.4738		-0.000457	-0.000452		0	0
						-244.141	-161.743											0.007539	0.007537																				-50.1396	-50.3575		-0.000461	-0.000456		0	0
						-195.312	-183.105											0.007543	0.007541																				-50.0096	-50.2373		-0.000465	-0.000459		0	0
						-238.037	-146.484											0.007548	0.007546																				-49.8749	-50.1129		-0.000468	-0.000463		0	0
						-189.209	-158.691											0.007553	0.007551																				-49.7353	-49.9841		-0.000472	-0.000467		0	0
						-167.847	-195.312											0.007558	0.007556																				-49.5905	-49.8504		-0.000477	-0.000471		0	0
						-170.898	-161.743											0.007563	0.007561																				-49.4402	-49.7116		-0.000481	-0.000475		0	0
						-192.261	-152.588											0.007569	0.007566																				-49.284	-49.5675		-0.000485	-0.000479		0	0
						-140.381	-198.364											0.007574	0.007571																				-49.1216	-49.4176		-0.00049	-0.000483		0	0
						-177.002	-177.002											0.007579	0.007576																				-48.9527	-49.2617		-0.000495	-0.000487		0	0
						-149.536	-167.847											0.007584	0.007582																				-48.7769	-49.0995		-0.000499	-0.000492		0	0
						-192.261	-158.691											0.00759	0.007587																				-48.5938	-48.9305		-0.000505	-0.000496		0	0
						-198.364	-198.364											0.007595	0.007592																				-48.403	-48.7544		-0.00051	-0.000501		0	0
						-183.105	-177.002											0.0076	0.007598																				-48.204	-48.5708		-0.000515	-0.000506		0	0
						-167.847	-177.002											0.007606	0.007603																				-47.9962	-48.3792		-0.000521	-0.000512		0	0
						-228.882	-195.312											0.007611	0.007608																				-47.7793	-48.1792		-0.000527	-0.000517		0	0
						-225.83	-201.416											0.007617	0.007614																				-47.5524	-47.9703		-0.000534	-0.000523		0	0
						-210.571	-207.52											0.007623	0.007619																				-47.3149	-47.7518		-0.00054	-0.000529		0	0
						-234.985	-216.675											0.007629	0.007625																				-47.066	-47.5232		-0.000547	-0.000535		0	0
						-173.95	-204.468											0.007634	0.007631																				-46.8047	-47.2836		-0.000554	-0.000542		0	0
						-228.882	-244.141											0.00764	0.007637																				-46.5301	-47.0323		-0.000562	-0.000549		0	0
						-256.348	-216.675											0.007646	0.007642																				-46.2409	-46.7682		-0.00057	-0.000556		0	0
						-241.089	-198.364											0.007652	0.007648																				-45.9358	-46.4904		-0.000579	-0.000564		0	0
						-192.261	-186.157											0.007659	0.007654																				-45.6135	-46.1977		-0.000588	-0.000573		0	0
						-256.348	-198.364											0.007665	0.007661																				-45.2723	-45.8887		-0.000598	-0.000581		0	0
						-213.623	-210.571											0.007671	0.007667																				-44.9105	-45.562		-0.000609	-0.000591		0	0
						-170.898	-195.312											0.007678	0.007673																				-44.5263	-45.2159		-0.00062	-0.000601		0	0
						-192.261	-219.727											0.007685	0.00768																				-44.1175	-44.8487		-0.000632	-0.000611		0	0
						-198.364	-210.571											0.007692	0.007686																				-43.6822	-44.4585		-0.000645	-0.000623		0	0
						-210.571	-155.64											0.007699	0.007693																				-43.218	-44.0432		-0.000659	-0.000635		0	0
						-201.416	-195.312											0.007706	0.0077																				-42.7228	-43.6008		-0.000675	-0.000648		0	0
						-167.847	-131.226											0.007713	0.007707																				-42.1942	-43.129		-0.000691	-0.000663		0	0
						-112.915	-201.416											0.007721	0.007714																				-41.6302	-42.6255		-0.000709	-0.000678		0	0
						-228.882	-170.898											0.007728	0.007722																				-41.0288	-42.0881		-0.000729	-0.000695		0	0
						-137.329	-131.226											0.007736	0.007729																				-40.3882	-41.5148		-0.00075	-0.000714		0	0
						-128.174	-180.054											0.007745	0.007737																				-39.7071	-40.9034		-0.000774	-0.000734		0	0
						-177.002	-189.209											0.007753	0.007745																				-38.9846	-40.2525		-0.000799	-0.000755		0	0
						-149.536	-158.691											0.007762	0.007753																				-38.2207	-39.5606		-0.000826	-0.000779		0	0
						-177.002	-207.52											0.007771	0.007762																				-37.4158	-38.8272		-0.000856	-0.000805		0	0
						-207.52	-192.261											0.007781	0.007771																				-36.5716	-38.0522		-0.000888	-0.000833		0	0
						-155.64	-149.536											0.007791	0.00778																				-35.6904	-37.2362		-0.000922	-0.000863		0	0
						-189.209	-195.312											0.007801	0.00779																				-34.7759	-36.3811		-0.000959	-0.000896		-1e-06	0
						-238.037	-189.209											0.007812	0.0078																				-33.8328	-35.4896		-0.000999	-0.000931		-2e-06	0
						-183.105	-131.226											0.007823	0.00781																				-32.8671	-34.5654		-0.00104	-0.000968		-5e-06	0
						-158.691	-161.743											0.007835	0.007821																				-31.8857	-33.6136		-0.001084	-0.001008		-9e-06	0
						-231.934	-192.261											0.007847	0.007833																				-30.8967	-32.6403		-0.00113	-0.001051		-1.4e-05	0
						-186.157	-115.967											0.00786	0.007844																				-29.909	-31.6529		-0.001177	-0.001095		-2.2e-05	0
						-207.52	-173.95											0.007874	0.007857																				-28.9323	-30.6597		-0.001224	-0.001141		-3.2e-05	0
						-262.451	-161.743											0.007888	0.00787																				-27.9765	-29.6699		-0.001273	-0.001188		-4.5e-05	0
						-152.588	-177.002											0.007902	0.007883																				-27.0516	-28.6934		-0.001321	-0.001237		-6e-05	0
						-204.468	-164.795											0.007917	0.007897																				-26.1675	-27.7403		-0.001368	-0.001285		-7.9e-05	0
						-189.209	-186.157											0.007933	0.007912																				-25.3333	-26.8209		-0.001413	-0.001333		-0.0001	0
						-180.054	-155.64											0.00795	0.007927																				-24.5571	-25.9449		-0.001457	-0.00138		-0.000125	0
						-195.312	-173.95											0.007966	0.007943																				-23.8458	-25.1216		-0.001497	-0.001426		-0.000153	0
						-213.623	-192.261											0.007984	0.007959																				-23.2046	-24.3588		-0.001535	-0.001469		-0.000184	0
						-234.985	-146.484											0.008002	0.007975																				-22.6373	-23.6633		-0.001569	-0.001509		-0.00022	0
						-201.416	-158.691											0.00802	0.007992																				-22.146	-23.0401		-0.001598	-0.001546		-0.000259	0
						-253.296	-238.037											0.008038	0.008009																				-21.7314	-22.4928		-0.001624	-0.001579		-0.000302	0
						-195.312	-167.847											0.008057	0.008027																				-21.3926	-22.023		-0.001645	-0.001609		-0.00035	0
						-189.209	-189.209											0.008076	0.008044																				-21.1277	-21.6311		-0.001663	-0.001633		-0.000402	0
						-186.157	-207.52											0.008096	0.008062																				-20.9338	-21.3159		-0.001676	-0.001654		-0.000458	0
						-213.623	-204.468											0.008116	0.00808																				-20.8072	-21.0753		-0.001685	-0.001671		-0.000519	0
						-204.468	-119.019											0.008135	0.008098																				-20.7438	-20.9061		-0.001691	-0.001683		-0.000585	0
						-219.727	-177.002											0.008155	0.008116																				-20.7391	-20.8043		-0.001693	-0.001692		-0.000657	0
						-183.105	-119.019											0.008175	0.008134																				-20.7885	-20.7656		-0.001692	-0.001697		-0.000733	0
						-155.64	-152.588											0.008196	0.008152																				-20.8872	-20.7854		-0.001687	-0.001698		-0.000815	0
						-207.52	-180.054											0.008216	0.008169																				-21.0308	-20.8589		-0.00168	-0.001696		-0.000902	0
						-180.054	-155.64											0.008236	0.008187																				-21.215	-20.9811		-0.001671	-0.001692		-0.000995	0
						-189.209	-186.157											0.008257	0.008204																				-21.4357	-21.1476		-0.001659	-0.001684		-0.001094	0
						-189.209	-204.468											0.008277	0.008221																				-21.6893	-21.3539		-0.001646	-0.001675		-0.001199	0
						-173.95	-167.847											0.008298	0.008238																				-21.9728	-21.5958		-0.00163	-0.001663		-0.001309	0
						-207.52	-146.484											0.008319	0.008254																				-22.2835	-21.8697		-0.001613	-0.001649		-0.001426	0
						-219.727	-180.054											0.00834	0.008271																				-22.6194	-22.1724		-0.001595	-0.001634		-0.001549	0
						-207.52	-201.416											0.00836	0.008287																				-22.9788	-22.5014		-0.001575	-0.001617		-0.001678	0
						-183.105	-155.64											0.008381	0.008303																				-23.3607	-22.8543		-0.001554	-0.001598		-0.001813	0
						-283.813	-183.105											0.008403	0.008318																				-23.7641	-23.2298		-0.001532	-0.001579		-0.001955	0
						-122.07	-149.536											0.008424	0.008333																				-24.1885	-23.6265		-0.001508	-0.001558		-0.002104	0
						-222.778	-186.157											0.008446	0.008348																				-24.6333	-24.0436		-0.001484	-0.001536		-0.002259	0
						-167.847	-216.675											0.008467	0.008362																				-25.0977	-24.4805		-0.001459	-0.001514		-0.002421	0
						-167.847	-189.209											0.008489	0.008377																				-25.5809	-24.9365		-0.001432	-0.00149		-0.00259	0
						-177.002	-198.364											0.008511	0.00839																				-26.0817	-25.411		-0.001405	-0.001465		-0.002766	0
						-238.037	-228.882											0.008533	0.008404																				-26.5987	-25.903		-0.001378	-0.00144		-0.002949	0
						-216.675	-204.468											0.008556	0.008417																				-27.1301	-26.4114		-0.001349	-0.001414		-0.003139	0
						-228.882	-204.468											0.008579	0.00843																				-27.674	-26.935		-0.001321	-0.001387		-0.003336	0
						-241.089	-231.934											0.008602	0.008443																				-28.2282	-27.4719		-0.001291	-0.00136		-0.00354	0
						-146.484	-201.416											0.008626	0.008455																				-28.7904	-28.0205		-0.001262	-0.001332		-0.003751	0
						-167.847	-170.898											0.008649	0.008467																				-29.3582	-28.5786		-0.001233	-0.001304		-0.003969	0
						-225.83	-244.141											0.008674	0.008478																				-29.9294	-29.1442		-0.001203	-0.001276		-0.004194	0
						-192.261	-177.002											0.008698	0.00849																				-30.5015	-29.715		-0.001174	-0.001247		-0.004426	0
						-152.588	-222.778											0.008723	0.008501																				-31.0724	-30.2887		-0.001145	-0.001219		-0.004664	0
						-158.691	-201.416											0.008749	0.008512																				-31.64	-30.8634		-0.001117	-0.001191		-0.004909	0
						-198.364	-146.484											0.008775	0.008522																				-32.2023	-31.4367		-0.001089	-0.001164		-0.00516	0
						-155.64	-198.364											0.008801	0.008532																				-32.7576	-32.0069		-0.001062	-0.001136		-0.005417	0
						-213.623	-167.847											0.008828	0.008542																				-33.3041	-32.572		-0.001036	-0.00111		-0.005677	0
						-238.037	-155.64											0.008855	0.008552																				-33.8404	-33.1303		-0.00101	-0.001083		-0.005939	0
						-164.795	-186.157											0.008883	0.008561																				-34.3652	-33.6803		-0.000985	-0.001058		-0.006201	0
						-210.571	-201.416											0.008912	0.00857																				-34.8772	-34.2205		-0.000962	-0.001033		-0.006457	0
						-210.571	-152.588											0.008941	0.008579																				-35.3755	-34.7496		-0.000939	-0.00101		-0.006702	0
						-216.675	-180.054											0.008971	0.008588																				-35.8591	-35.2664		-0.000917	-0.000986		-0.006925	0
						-210.571	-207.52											0.009001	0.008596																				-36.3272	-35.7699		-0.000896	-0.000964		-0.007118	0
						-207.52	-180.054											0.009031	0.008605																				-36.7792	-36.259		-0.000876	-0.000943		-0.00727	0
						-137.329	-146.484											0.009061	0.008613																				-37.2145	-36.733		-0.000857	-0.000923		-0.007376	0
						-231.934	-173.95											0.009091	0.008621																				-37.6326	-37.191		-0.00084	-0.000903		-0.007433	0
						-158.691	-189.209											0.009121	0.008629																				-38.0332	-37.6325		-0.000823	-0.000885		-0.007445	0
						-195.312	-173.95											0.009151	0.008636																				-38.4161	-38.0568		-0.000808	-0.000867		-0.00742	0
						-225.83	-186.157											0.00918	0.008644																				-38.781	-38.4637		-0.000793	-0.00085		-0.007366	0
						-213.623	-204.468											0.009209	0.008651																				-39.1279	-38.8526		-0.00078	-0.000835		-0.00729	0
						-164.795	-137.329											0.009237	0.008659																				-39.4568	-39.2236		-0.000767	-0.00082		-0.007198	0
						-186.157	-173.95											0.009264	0.008666																				-39.768	-39.5764		-0.000755	-0.000806		-0.007096	0
						-204.468	-195.312											0.009291	0.008673																				-40.0615	-39.9112		-0.000744	-0.000792		-0.006986	0
						-210.571	-158.691											0.009316	0.00868																				-40.3379	-40.2281		-0.000734	-0.00078		-0.006873	0
						-192.261	-155.64											0.009342	0.008688																				-40.5975	-40.5274		-0.000725	-0.000768		-0.006757	0
						-219.727	-143.433											0.009366	0.008695																				-40.8409	-40.8094		-0.000716	-0.000757		-0.006639	0
						-177.002	-180.054											0.00939	0.008702																				-41.0686	-41.0747		-0.000708	-0.000747		-0.006522	0
						-198.364	-186.157											0.009414	0.008709																				-41.2814	-41.3238		-0.000701	-0.000738		-0.006405	0
						-231.934	-173.95											0.009437	0.008715																				-41.4799	-41.5573		-0.000694	-0.000729		-0.00629	0
						-216.675	-201.416											0.009459	0.008722																				-41.665	-41.776		-0.000688	-0.000721		-0.006175	0
						-201.416	-210.571											0.009481	0.008729																				-41.8373	-41.9806		-0.000682	-0.000713		-0.006061	0
						-222.778	-173.95											0.009503	0.008736																				-41.9978	-42.1718		-0.000676	-0.000706		-0.005949	0
						-192.261	-149.536											0.009524	0.008743																				-42.1471	-42.3505		-0.000671	-0.000699		-0.005838	0
						-177.002	-216.675											0.009545	0.00875																				-42.2861	-42.5174		-0.000667	-0.000693		-0.005729	0
						-231.934	-167.847											0.009565	0.008756																				-42.4155	-42.6733		-0.000662	-0.000687		-0.005621	0
						-216.675	-180.054											0.009585	0.008763																				-42.5363	-42.8192		-0.000658	-0.000682		-0.005515	0
						-219.727	-170.898											0.009604	0.00877																				-42.6491	-42.9558		-0.000655	-0.000677		-0.00541	0
						-256.348	-198.364											0.009624	0.008777																				-42.7547	-43.0838		-0.000651	-0.000672		-0.005307	0
						-177.002	-143.433											0.009643	0.008783																				-42.8538	-43.204		-0.000648	-0.000668		-0.005205	0
						-256.348	-216.675											0.009661	0.00879																				-42.9471	-43.3171		-0.000645	-0.000664		-0.005105	0
						-271.606	-201.416											0.00968	0.008797																				-43.0352	-43.4238		-0.000642	-0.00066		-0.005006	0
						-183.105	-195.312											0.009698	0.008804																				-43.1187	-43.5246		-0.00064	-0.000656		-0.00491	0
						-271.606	-192.261											0.009715	0.00881																				-43.1982	-43.6203		-0.000637	-0.000653		-0.004815	0
						-268.555	-189.209											0.009733	0.008817																				-43.2742	-43.7114		-0.000635	-0.00065		-0.004721	0
						-222.778	-167.847											0.00975	0.008824																				-43.3472	-43.7984		-0.000633	-0.000647		-0.004629	0
						-250.244	-198.364											0.009767	0.008831																				-43.4176	-43.8818		-0.00063	-0.000644		-0.004539	0
						-241.089	-204.468											0.009784	0.008837																				-43.4858	-43.9621		-0.000628	-0.000641		-0.004451	0
						-180.054	-170.898											0.009801	0.008844																				-43.5523	-44.0397		-0.000626	-0.000638		-0.004364	0
						-244.141	-180.054											0.009817	0.008851																				-43.6173	-44.1149		-0.000624	-0.000635		-0.004278	0
						-253.296	-167.847											0.009833	0.008858																				-43.6812	-44.1882		-0.000622	-0.000633		-0.004195	0
						-216.675	-173.95											0.009849	0.008864																				-43.7442	-44.2598		-0.00062	-0.00063		-0.004112	0
						-228.882	-183.105											0.009865	0.008871																				-43.8066	-44.3301		-0.000619	-0.000628		-0.004032	0
						-244.141	-253.296											0.00988	0.008878																				-43.8685	-44.3993		-0.000617	-0.000625		-0.003953	0
						-149.536	-173.95											0.009896	0.008885																				-43.9303	-44.4676		-0.000615	-0.000623		-0.003875	0
						-241.089	-216.675											0.009911	0.008891																				-43.992	-44.5353		-0.000613	-0.000621		-0.003799	0
						-271.606	-219.727											0.009926	0.008898																				-44.0538	-44.6025		-0.000611	-0.000618		-0.003724	0
						-201.416	-241.089											0.00994	0.008905																				-44.1158	-44.6694		-0.000609	-0.000616		-0.003651	0
						-219.727	-192.261											0.009955	0.008911																				-44.178	-44.7362		-0.000608	-0.000614		-0.003579	0
						-259.399	-201.416											0.009969	0.008918																				-44.2406	-44.8028		-0.000606	-0.000611		-0.003508	0
						-183.105	-173.95											0.009983	0.008925																				-44.3036	-44.8695		-0.000604	-0.000609		-0.003439	0
						-137.329	-198.364											0.009998	0.008931																				-44.367	-44.9363		-0.000602	-0.000607		-0.003371	0
						-250.244	-152.588											0.010011	0.008938																				-44.431	-45.0033		-0.0006	-0.000605		-0.003305	0
						-161.743	-195.312											0.010025	0.008945																				-44.4954	-45.0705		-0.000598	-0.000602		-0.00324	0
						-186.157	-198.364											0.010039	0.008951																				-44.5604	-45.138		-0.000596	-0.0006		-0.003176	0
						-177.002	-201.416											0.010052	0.008958																				-44.6259	-45.2057		-0.000594	-0.000598		-0.003113	0
						-134.277	-177.002											0.010065	0.008964																				-44.6919	-45.2737		-0.000592	-0.000595		-0.003052	0
						-170.898	-186.157											0.010078	0.008971																				-44.7583	-45.3421		-0.000591	-0.000593		-0.002992	0
						-164.795	-155.64											0.010091	0.008978																				-44.8253	-45.4108		-0.000589	-0.000591		-0.002932	0
						-164.795	-177.002											0.010104	0.008984																				-44.8927	-45.4797		-0.000587	-0.000589		-0.002875	0
						-173.95	-164.795											0.010117	0.008991																				-44.9606	-45.549		-0.000585	-0.000586		-0.002818	0
						-216.675	-219.727											0.010129	0.008997																				-45.0289	-45.6185		-0.000583	-0.000584		-0.002762	0
						-210.571	-152.588											0.010142	0.009004																				-45.0975	-45.6883		-0.000581	-0.000582		-0.002707	0
						-131.226	-173.95											0.010154	0.00901																				-45.1666	-45.7584		-0.000579	-0.00058		-0.002654	0
						-207.52	-164.795											0.010166	0.009017																				-45.2359	-45.8287		-0.000577	-0.000577		-0.002601	0
						-173.95	-149.536											0.010178	0.009023																				-45.3056	-45.8991		-0.000575	-0.000575		-0.00255	0
						-128.174	-119.019											0.01019	0.00903																				-45.3755	-45.9698		-0.000572	-0.000573		-0.0025	0
						-204.468	-170.898											0.010202	0.009036																				-45.4456	-46.0406		-0.00057	-0.00057		-0.00245	0
						-173.95	-140.381											0.010213	0.009043																				-45.516	-46.1115		-0.000568	-0.000568		-0.002402	0
						-164.795	-152.588											0.010225	0.009049																				-45.5866	-46.1825		-0.000566	-0.000566		-0.002354	0
						-241.089	-204.468											0.010236	0.009055																				-45.6573	-46.2537		-0.000564	-0.000564		-0.002307	0
						-256.348	-167.847											0.010248	0.009062																				-45.7282	-46.3249		-0.000562	-0.000561		-0.002262	0
						-198.364	-173.95											0.010259	0.009068																				-45.7992	-46.3961		-0.00056	-0.000559		-0.002217	0
						-250.244	-195.312											0.01027	0.009074																				-45.8704	-46.4674		-0.000558	-0.000557		-0.002173	0
						-152.588	-149.536											0.010281	0.009081																				-45.9416	-46.5386		-0.000556	-0.000555		-0.00213	0
						-244.141	-186.157											0.010292	0.009087																				-46.0129	-46.6099		-0.000554	-0.000552		-0.002088	0
						-228.882	-207.52											0.010302	0.009093																				-46.0842	-46.6811		-0.000552	-0.00055		-0.002046	0
						-241.089	-164.795											0.010313	0.0091																				-46.1556	-46.7523		-0.00055	-0.000548		-0.002006	0
						-201.416	-180.054											0.010323	0.009106																				-46.227	-46.8235		-0.000548	-0.000546		-0.001966	0
						-259.399	-183.105											0.010334	0.009112																				-46.2985	-46.8946		-0.000546	-0.000544		-0.001927	0
						-198.364	-161.743											0.010344	0.009118																				-46.3699	-46.9656		-0.000544	-0.000541		-0.001888	0
						-201.416	-158.691											0.010354	0.009124																				-46.4414	-47.0366		-0.000542	-0.000539		-0.001851	0
						-247.192	-207.52											0.010364	0.009131																				-46.5129	-47.1075		-0.00054	-0.000537		-0.001814	0
						-173.95	-177.002											0.010374	0.009137																				-46.5844	-47.1783		-0.000538	-0.000535		-0.001778	0
						-195.312	-210.571											0.010384	0.009143																				-46.6558	-47.2491		-0.000536	-0.000533		-0.001743	0
						-231.934	-201.416											0.010394	0.009149																				-46.7273	-47.3197		-0.000534	-0.000531		-0.001708	0
						-186.157	-192.261											0.010404	0.009155																				-46.7988	-47.3902		-0.000532	-0.000529		-0.001674	0
						-177.002	-177.002											0.010413	0.009161																				-46.8702	-47.4607		-0.000529	-0.000526		-0.001641	0
						-207.52	-228.882											0.010423	0.009167																				-46.9416	-47.531		-0.000527	-0.000524		-0.001608	0
						-177.002	-180.054											0.010432	0.009173																				-47.0131	-47.6013		-0.000525	-0.000522		-0.001576	0
						-207.52	-186.157											0.010442	0.00918																				-47.0844	-47.6715		-0.000523	-0.00052		-0.001545	0
						-228.882	-195.312											0.010451	0.009186																				-47.1558	-47.7416		-0.000521	-0.000518		-0.001514	0
						-94.6045	-173.95											0.01046	0.009192																				-47.2272	-47.8115		-0.000519	-0.000516		-0.001484	0
						-177.002	-198.364											0.010469	0.009198																				-47.2985	-47.8814		-0.000517	-0.000514		-0.001454	0
						-219.727	-201.416											0.010479	0.009204																				-47.3698	-47.9512		-0.000516	-0.000512		-0.001425	0
						-152.588	-180.054											0.010487	0.00921																				-47.441	-48.0209		-0.000514	-0.00051		-0.001397	0
						-149.536	-155.64											0.010496	0.009215																				-47.5122	-48.0905		-0.000512	-0.000508		-0.001369	0
						-210.571	-216.675											0.010505	0.009221																				-47.5834	-48.16		-0.00051	-0.000506		-0.001342	0
						-146.484	-155.64											0.010514	0.009227																				-47.6546	-48.2293		-0.000508	-0.000504		-0.001315	0
						-146.484	-189.209											0.010523	0.009233																				-47.7257	-48.2986		-0.000506	-0.000502		-0.001289	0
						-204.468	-164.795											0.010531	0.009239																				-47.7967	-48.3678		-0.000504	-0.0005		-0.001263	0
						-219.727	-164.795											0.01054	0.009245																				-47.8677	-48.4368		-0.000502	-0.000498		-0.001238	0
						-198.364	-161.743											0.010548	0.009251																				-47.9387	-48.5058		-0.0005	-0.000496		-0.001213	0
						-213.623	-201.416											0.010557	0.009257																				-48.0096	-48.5746		-0.000498	-0.000494		-0.001189	0
						-186.157	-216.675											0.010565	0.009263																				-48.0804	-48.6433		-0.000496	-0.000492		-0.001165	0
						-189.209	-198.364											0.010573	0.009268																				-48.1511	-48.7119		-0.000494	-0.00049		-0.001142	0
						-225.83	-204.468											0.010581	0.009274																				-48.2218	-48.7803		-0.000492	-0.000488		-0.001119	0
						-216.675	-155.64											0.01059	0.00928																				-48.2924	-48.8486		-0.00049	-0.000486		-0.001097	0
						-146.484	-177.002											0.010598	0.009286																				-48.3629	-48.9167		-0.000488	-0.000484		-0.001075	0
						-207.52	-216.675											0.010606	0.009291																				-48.4332	-48.9847		-0.000486	-0.000482		-0.001053	0
						-173.95	-155.64											0.010614	0.009297																				-48.5035	-49.0526		-0.000485	-0.00048		-0.001032	0
						-170.898	-192.261											0.010622	0.009303																				-48.5737	-49.1203		-0.000483	-0.000478		-0.001012	0
						-213.623	-204.468											0.010629	0.009309																				-48.6437	-49.1878		-0.000481	-0.000477		-0.000991	0
						-213.623	-222.778											0.010637	0.009314																				-48.7136	-49.2552		-0.000479	-0.000475		-0.000972	0
						-189.209	-189.209											0.010645	0.00932																				-48.7834	-49.3224		-0.000477	-0.000473		-0.000952	0
						-259.399	-195.312											0.010652	0.009326																				-48.8531	-49.3894		-0.000475	-0.000471		-0.000933	0
						-222.778	-146.484											0.01066	0.009331																				-48.9226	-49.4563		-0.000473	-0.000469		-0.000914	0
						-167.847	-177.002											0.010668	0.009337																				-48.9919	-49.523		-0.000472	-0.000467		-0.000896	0
						-201.416	-189.209											0.010675	0.009343																				-49.0611	-49.5894		-0.00047	-0.000465		-0.000878	0
						-219.727	-164.795											0.010683	0.009348																				-49.1301	-49.6557		-0.000468	-0.000464		-0.000861	0
						-247.192	-189.209											0.01069	0.009354																				-49.199	-49.7218		-0.000466	-0.000462		-0.000843	0
						-198.364	-204.468											0.010697	0.009359																				-49.2677	-49.7878		-0.000464	-0.00046		-0.000827	0
						-213.623	-183.105											0.010705	0.009365																				-49.3362	-49.8535		-0.000463	-0.000458		-0.00081	0
						-201.416	-195.312											0.010712	0.009371																				-49.4045	-49.919		-0.000461	-0.000457		-0.000794	0
						-183.105	-164.795											0.010719	0.009376																				-49.4727	-49.9843		-0.000459	-0.000455		-0.000778	0
						-140.381	-213.623											0.010726	0.009382																				-49.5406	-50.0494		-0.000457	-0.000453		-0.000762	0
						-173.95	-140.381											0.010733	0.009387																				-49.6084	-50.1142		-0.000455	-0.000451		-0.000747	0
						-131.226	-259.399											0.01074	0.009393																				-49.6759	-50.1789		-0.000454	-0.00045		-0.000732	0
						-219.727	-167.847											0.010747	0.009398																				-49.7433	-50.2433		-0.000452	-0.000448		-0.000717	0
						-149.536	-189.209											0.010754	0.009404																				-49.8104	-50.3076		-0.00045	-0.000446		-0.000703	0
						-186.157	-189.209											0.010761	0.009409																				-49.8774	-50.3716		-0.000449	-0.000445		-0.000689	0
						-170.898	-177.002											0.010768	0.009415																				-49.9441	-50.4354		-0.000447	-0.000443		-0.000675	0
						-167.847	-170.898											0.010775	0.00942																				-50.0106	-50.499		-0.000445	-0.000441		-0.000661	0
						-152.588	-198.364											0.010782	0.009425																				-50.0769	-50.5623		-0.000443	-0.00044		-0.000648	0
						-234.985	-170.898											0.010788	0.009431																				-50.143	-50.6254		-0.000442	-0.000438		-0.000635	0
						-149.536	-143.433											0.010795	0.009436																				-50.2088	-50.6883		-0.00044	-0.000436		-0.000622	0
						-177.002	-195.312											0.010802	0.009442																				-50.2744	-50.751		-0.000438	-0.000435		-0.00061	0
						-238.037	-164.795											0.010808	0.009447																				-50.3398	-50.8134		-0.000437	-0.000433		-0.000598	0
						-204.468	-155.64											0.010815	0.009452																				-50.405	-50.8756		-0.000435	-0.000431		-0.000586	0
						-238.037	-186.157											0.010822	0.009458																				-50.4699	-50.9376		-0.000434	-0.00043		-0.000574	0
						-201.416	-131.226											0.010828	0.009463																				-50.5346	-50.9993		-0.000432	-0.000428		-0.000562	0
						-177.002	-158.691											0.010835	0.009468																				-50.5991	-51.0608		-0.00043	-0.000427		-0.000551	0
						-158.691	-146.484											0.010841	0.009474																				-50.6633	-51.1221		-0.000429	-0.000425		-0.00054	0
						-189.209	-155.64											0.010847	0.009479																				-50.7273	-51.1831		-0.000427	-0.000424		-0.000529	0
						-134.277	-158.691											0.010854	0.009484																				-50.7911	-51.2439		-0.000426	-0.000422		-0.000518	0
						-161.743	-173.95											0.01086	0.009489																				-50.8546	-51.3045		-0.000424	-0.00042		-0.000508	0
						-259.399	-161.743											0.010866	0.009495																				-50.9178	-51.3648		-0.000422	-0.000419		-0.000498	0
						-177.002	-173.95											0.010873	0.0095																				-50.9808	-51.4249		-0.000421	-0.000417		-0.000488	0
						-189.209	-186.157											0.010879	0.009505																				-51.0436	-51.4847		-0.000419	-0.000416		-0.000478	0
						-167.847	-161.743											0.010885	0.00951																				-51.1061	-51.5443		-0.000418	-0.000414		-0.000468	0
						-161.743	-186.157											0.010891	0.009516																				-51.1684	-51.6036		-0.000416	-0.000413		-0.000459	0
						-250.244	-192.261											0.010897	0.009521																				-51.2304	-51.6628		-0.000415	-0.000411		-0.00045	0
						-204.468	-143.433											0.010903	0.009526																				-51.2922	-51.7216		-0.000413	-0.00041		-0.000441	0
						-173.95	-158.691											0.010909	0.009531																				-51.3537	-51.7803		-0.000412	-0.000409		-0.000432	0
						-112.915	-180.054											0.010915	0.009536																				-51.4149	-51.8386		-0.00041	-0.000407		-0.000423	0
						-207.52	-192.261											0.010921	0.009542																				-51.476	-51.8968		-0.000409	-0.000406		-0.000414	0
						-149.536	-164.795											0.010927	0.009547																				-51.5367	-51.9547		-0.000407	-0.000404		-0.000406	0
						-189.209	-167.847											0.010933	0.009552																				-51.5972	-52.0123		-0.000406	-0.000403		-0.000398	0
						-234.985	-170.898											0.010939	0.009557																				-51.6575	-52.0697		-0.000405	-0.000401		-0.00039	0
						-204.468	-164.795											0.010945	0.009562																				-51.7175	-52.1269		-0.000403	-0.0004		-0.000382	0
						-161.743	-198.364											0.010951	0.009567																				-51.7772	-52.1838		-0.000402	-0.000399		-0.000374	0
						-216.675	-186.157											0.010957	0.009572																				-51.8367	-52.2405		-0.0004	-0.000397		-0.000367	0
						-134.277	-167.847											0.010963	0.009577																				-51.896	-52.297		-0.000399	-0.000396		-0.000359	0
						-177.002	-180.054											0.010968	0.009582																				-51.9549	-52.3532		-0.000397	-0.000395		-0.000352	0
						-201.416	-216.675											0.010974	0.009587																				-52.0137	-52.4091		-0.000396	-0.000393		-0.000345	0
						-164.795	-167.847											0.01098	0.009592																				-52.0722	-52.4648		-0.000395	-0.000392		-0.000338	0
						-161.743	-210.571											0.010986	0.009598																				-52.1304	-52.5203		-0.000393	-0.000391		-0.000331	0
						-204.468	-213.623											0.010991	0.009603																				-52.1883	-52.5755		-0.000392	-0.000389		-0.000325	0
						-125.122	-189.209											0.010997	0.009608																				-52.2461	-52.6305		-0.000391	-0.000388		-0.000318	0
						-112.915	-189.209											0.011003	0.009613																				-52.3035	-52.6853		-0.000389	-0.000387		-0.000312	0
						-186.157	-244.141											0.011008	0.009618																				-52.3607	-52.7398		-0.000388	-0.000385		-0.000305	0
						-195.312	-231.934											0.011014	0.009623																				-52.4177	-52.794		-0.000387	-0.000384		-0.000299	0
						-103.76	-180.054											0.011019	0.009628																				-52.4744	-52.8481		-0.000385	-0.000383		-0.000293	0
						-280.762	-146.484											0.011025	0.009632																				-52.5309	-52.9019		-0.000384	-0.000381		-0.000287	0
						-170.898	-189.209											0.01103	0.009637																				-52.5871	-52.9554		-0.000383	-0.00038		-0.000281	0
						-198.364	-189.209											0.011036	0.009642																				-52.643	-53.0087		-0.000381	-0.000379		-0.000276	0
						-204.468	-183.105											0.011041	0.009647																				-52.6987	-53.0618		-0.00038	-0.000378		-0.00027	0
						-183.105	-186.157											0.011047	0.009652																				-52.7541	-53.1146		-0.000379	-0.000376		-0.000265	0
						-137.329	-192.261											0.011052	0.009657																				-52.8093	-53.1672		-0.000378	-0.000375		-0.000259	0
						-234.985	-183.105											0.011057	0.009662																				-52.8643	-53.2196		-0.000376	-0.000374		-0.000254	0
						-192.261	-180.054											0.011063	0.009667																				-52.919	-53.2717		-0.000375	-0.000373		-0.000249	0
						-177.002	-143.433											0.011068	0.009672																				-52.9734	-53.3236		-0.000374	-0.000372		-0.000244	0
						-167.847	-183.105											0.011073	0.009677																				-53.0277	-53.3753		-0.000373	-0.00037		-0.000239	0
						-225.83	-128.174											0.011079	0.009682																				-53.0816	-53.4267		-0.000371	-0.000369		-0.000234	0
						-131.226	-164.795											0.011084	0.009686																				-53.1353	-53.4779		-0.00037	-0.000368		-0.000229	0
						-183.105	-173.95											0.011089	0.009691																				-53.1888	-53.5288		-0.000369	-0.000367		-0.000225	0
						-204.468	-180.054											0.011095	0.009696																				-53.242	-53.5796		-0.000368	-0.000366		-0.00022	0
						-164.795	-158.691											0.0111	0.009701																				-53.295	-53.6301		-0.000367	-0.000365		-0.000216	0
						-283.813	-183.105											0.011105	0.009706																				-53.3477	-53.6803		-0.000365	-0.000363		-0.000211	0
						-152.588	-195.312											0.01111	0.009711																				-53.4002	-53.7304		-0.000364	-0.000362		-0.000207	0
						-204.468	-173.95											0.011115	0.009715																				-53.4524	-53.7802		-0.000363	-0.000361		-0.000203	0
						-216.675	-173.95											0.011121	0.00972																				-53.5044	-53.8297		-0.000362	-0.00036		-0.000199	0
						-180.054	-167.847											0.011126	0.009725																				-53.5562	-53.8791		-0.000361	-0.000359		-0.000195	0
						-186.157	-173.95											0.011131	0.00973																				-53.6077	-53.9282		-0.00036	-0.000358		-0.000191	0
						-213.623	-192.261											0.011136	0.009734																				-53.659	-53.9771		-0.000358	-0.000357		-0.000187	0
						-180.054	-158.691											0.011141	0.009739																				-53.71	-54.0258		-0.000357	-0.000356		-0.000183	0
						-146.484	-183.105											0.011146	0.009744																				-53.7608	-54.0742		-0.000356	-0.000355		-0.000179	0
						-207.52	-225.83											0.011151	0.009749																				-53.8114	-54.1225		-0.000355	-0.000353		-0.000176	0
						-152.588	-186.157											0.011156	0.009753																				-53.8617	-54.1705		-0.000354	-0.000352		-0.000172	0
						-189.209	-170.898											0.011161	0.009758																				-53.9118	-54.2182		-0.000353	-0.000351		-0.000169	0
						-143.433	-228.882											0.011166	0.009763																				-53.9617	-54.2658		-0.000352	-0.00035		-0.000165	0
						-234.985	-173.95											0.011171	0.009768																				-54.0113	-54.3131		-0.000351	-0.000349		-0.000162	0
						-146.484	-167.847											0.011176	0.009772																				-54.0607	-54.3602		-0.00035	-0.000348		-0.000159	0
						-186.157	-225.83											0.011181	0.009777																				-54.1099	-54.4071		-0.000348	-0.000347		-0.000155	0
						-180.054	-170.898											0.011186	0.009782																				-54.1588	-54.4538		-0.000347	-0.000346		-0.000152	0
						-189.209	-189.209											0.011191	0.009786																				-54.2075	-54.5003		-0.000346	-0.000345		-0.000149	0
						-167.847	-192.261											0.011196	0.009791																				-54.256	-54.5465		-0.000345	-0.000344		-0.000146	0
						-140.381	-180.054											0.011201	0.009796																				-54.3042	-54.5926		-0.000344	-0.000343		-0.000143	0
						-143.433	-207.52											0.011206	0.0098																				-54.3522	-54.6384		-0.000343	-0.000342		-0.00014	0
						-256.348	-210.571											0.01121	0.009805																				-54.4	-54.684		-0.000342	-0.000341		-0.000137	0
						-183.105	-164.795											0.011215	0.00981																				-54.4476	-54.7294		-0.000341	-0.00034		-0.000135	0
						-155.64	-131.226											0.01122	0.009814																				-54.4949	-54.7746		-0.00034	-0.000339		-0.000132	0
						-219.727	-210.571											0.011225	0.009819																				-54.542	-54.8195		-0.000339	-0.000338		-0.000129	0
						-189.209	-180.054											0.01123	0.009823																				-54.5889	-54.8643		-0.000338	-0.000337		-0.000127	0
						-152.588	-155.64											0.011234	0.009828																				-54.6356	-54.9089		-0.000337	-0.000336		-0.000124	0
						-244.141	-213.623											0.011239	0.009833																				-54.682	-54.9532		-0.000336	-0.000335		-0.000122	0
						-152.588	-177.002											0.011244	0.009837																				-54.7283	-54.9974		-0.000335	-0.000334		-0.000119	0
						-210.571	-180.054											0.011249	0.009842																				-54.7743	-55.0413		-0.000334	-0.000333		-0.000117	0
						-231.934	-201.416											0.011254	0.009846																				-54.8201	-55.085		-0.000333	-0.000332		-0.000114	0
						-189.209	-167.847											0.011258	0.009851																				-54.8657	-55.1285		-0.000332	-0.000331		-0.000112	0
						-103.76	-173.95											0.011263	0.009855																				-54.911	-55.1719		-0.000331	-0.00033		-0.00011	0
						-180.054	-204.468											0.011268	0.00986																				-54.9562	-55.215		-0.00033	-0.00033		-0.000107	0
						-198.364	-155.64											0.011272	0.009864																				-55.0011	-55.2579		-0.000329	-0.000329		-0.000105	0
						-143.433	-152.588											0.011277	0.009869																				-55.0459	-55.3006		-0.000328	-0.000328		-0.000103	0
						-164.795	-189.209											0.011282	0.009873																				-55.0904	-55.3432		-0.000328	-0.000327		-0.000101	0
						-216.675	-201.416											0.011286	0.009878																				-55.1347	-55.3855		-0.000327	-0.000326		-9.9e-05	0
						-170.898	-204.468											0.011291	0.009882																				-55.1788	-55.4276		-0.000326	-0.000325		-9.7e-05	0
						-164.795	-204.468											0.011296	0.009887																				-55.2227	-55.4696		-0.000325	-0.000324		-9.5e-05	0
						-137.329	-213.623											0.0113	0.009891																				-55.2664	-55.5113		-0.000324	-0.000323		-9.3e-05	0
						-186.157	-201.416											0.011305	0.009896																				-55.3098	-55.5529		-0.000323	-0.000322		-9.1e-05	0
						-198.364	-225.83											0.011309	0.0099																				-55.3531	-55.5942		-0.000322	-0.000322		-8.9e-05	0
						-216.675	-216.675											0.011314	0.009905																				-55.3962	-55.6354		-0.000321	-0.000321		-8.8e-05	0
						-180.054	-192.261											0.011319	0.009909																				-55.3822	-55.6192		-0.000325	-0.000325		-8.6e-05	0
						-207.52	-253.296											0.011323	0.009914																				-55.3244	-55.5592		-0.000331	-0.00033		-8.4e-05	0
						-189.209	-183.105											0.011328	0.009919																				-55.2322	-55.4646		-0.000336	-0.000336		-8.2e-05	0
						-155.64	-213.623											0.011333	0.009923																				-55.1131	-55.3429		-0.000343	-0.000342		-8e-05	0
						-158.691	-189.209											0.011338	0.009928																				-54.9731	-55.2003		-0.000349	-0.000349		-7.9e-05	0
						-180.054	-180.054											0.011342	0.009933																				-54.8172	-55.0418		-0.000356	-0.000356		-7.7e-05	0
						-177.002	-183.105											0.011348	0.009938																				-54.6494	-54.8714		-0.000364	-0.000363		-7.5e-05	0
						-207.52	-222.778											0.011353	0.009943																				-54.4732	-54.6925		-0.000371	-0.000371		-7.4e-05	0
						-219.727	-152.588											0.011358	0.009948																				-54.2913	-54.5079		-0.000379	-0.000379		-7.2e-05	0
						-204.468	-192.261											0.011363	0.009953																				-54.1058	-54.3197		-0.000387	-0.000387		-7.1e-05	0
						-201.416	-161.743											0.011369	0.009959																				-53.9186	-54.1298		-0.000395	-0.000394		-6.9e-05	0
						-247.192	-167.847											0.011374	0.009964																				-53.7311	-53.9397		-0.000402	-0.000402		-6.8e-05	0
						-231.934	-170.898											0.01138	0.00997																				-53.5445	-53.7503		-0.00041	-0.00041		-6.6e-05	0
						-244.141	-180.054											0.011385	0.009975																				-53.3596	-53.5628		-0.000418	-0.000418		-6.5e-05	0
						-204.468	-170.898											0.011391	0.009981																				-53.1773	-53.3779		-0.000426	-0.000426		-6.3e-05	0
						-177.002	-207.52											0.011397	0.009987																				-52.9981	-53.1961		-0.000434	-0.000434		-6.2e-05	0
						-207.52	-170.898											0.011403	0.009993																				-52.8224	-53.0179		-0.000442	-0.000442		-6.1e-05	0
						-170.898	-183.105											0.011409	0.009999																				-52.6507	-52.8435		-0.000449	-0.000449		-5.9e-05	0
						-177.002	-164.795											0.011415	0.010005																				-52.4831	-52.6734		-0.000457	-0.000457		-5.8e-05	0
						-158.691	-170.898											0.011421	0.010011																				-52.3199	-52.5076		-0.000464	-0.000464		-5.7e-05	0
						-219.727	-143.433											0.011428	0.010017																				-52.1611	-52.3463		-0.000471	-0.000472		-5.5e-05	0
						-192.261	-204.468											0.011434	0.010024																				-52.0068	-52.1895		-0.000479	-0.000479		-5.4e-05	0
						-152.588	-152.588											0.01144	0.01003																				-51.8571	-52.0374		-0.000486	-0.000486		-5.3e-05	0
						-250.244	-167.847											0.011447	0.010036																				-51.712	-51.8898		-0.000493	-0.000493		-5.2e-05	0
						-140.381	-189.209											0.011453	0.010043																				-51.5714	-51.7468		-0.000499	-0.0005		-5.1e-05	0
						-189.209	-183.105											0.01146	0.01005																				-51.4354	-51.6083		-0.000506	-0.000507		-5e-05	0
						-158.691	-161.743											0.011466	0.010056																				-51.3038	-51.4744		-0.000513	-0.000513		-4.9e-05	0
						-183.105	-167.847											0.011473	0.010063																				-51.1767	-51.3448		-0.000519	-0.00052		-4.8e-05	0
						-195.312	-189.209											0.01148	0.01007																				-51.0538	-51.2195		-0.000525	-0.000526		-4.7e-05	0
						-183.105	-180.054											0.011487	0.010076																				-50.9352	-51.0985		-0.000531	-0.000532		-4.6e-05	0
						-155.64	-201.416											0.011493	0.010083																				-50.8207	-50.9816		-0.000537	-0.000538		-4.5e-05	0
						-152.588	-204.468											0.0115	0.01009																				-50.7102	-50.8688		-0.000543	-0.000544		-4.4e-05	0
						-201.416	-186.157											0.011507	0.010097																				-50.6037	-50.7599		-0.000549	-0.00055		-4.3e-05	0
						-125.122	-204.468											0.011514	0.010104																				-50.501	-50.6548		-0.000554	-0.000556		-4.2e-05	0
						-177.002	-183.105											0.011521	0.010111																				-50.402	-50.5535		-0.00056	-0.000561		-4.1e-05	0
						-189.209	-244.141											0.011528	0.010118																				-50.3067	-50.4558		-0.000565	-0.000566		-4e-05	0
						-137.329	-149.536											0.011535	0.010125																				-50.2149	-50.3617		-0.00057	-0.000572		-3.9e-05	0
						-134.277	-177.002											0.011543	0.010133																				-50.1266	-50.2709		-0.000575	-0.000577		-3.8e-05	0
						-231.934	-213.623											0.01155	0.01014																				-50.0415	-50.1836		-0.00058	-0.000582		-3.8e-05	0
						-152.588	-195.312											0.011557	0.010147																				-49.9597	-50.0994		-0.000585	-0.000586		-3.7e-05	0
						-183.105	-207.52											0.011564	0.010154																				-49.8811	-50.0184		-0.000589	-0.000591		-3.6e-05	0
						-210.571	-180.054											0.011572	0.010162																				-49.8055	-49.9404		-0.000594	-0.000596		-3.5e-05	0
						-173.95	-198.364											0.011579	0.010169																				-49.7328	-49.8653		-0.000598	-0.0006		-3.4e-05	0
						-158.691	-201.416											0.011586	0.010176																				-49.663	-49.7931		-0.000602	-0.000604		-3.4e-05	0
						-238.037	-192.261											0.011594	0.010184																				-49.5959	-49.7237		-0.000607	-0.000608		-3.3e-05	0
						-186.157	-164.795											0.011601	0.010191																				-49.5316	-49.657		-0.00061	-0.000612		-3.2e-05	0
						-210.571	-195.312											0.011608	0.010199																				-49.4698	-49.5928		-0.000614	-0.000616		-3.2e-05	0
						-170.898	-189.209											0.011616	0.010206																				-49.4106	-49.5311		-0.000618	-0.00062		-3.1e-05	0
						-195.312	-119.019											0.011623	0.010214																				-49.3538	-49.4719		-0.000622	-0.000624		-3e-05	0
						-167.847	-170.898											0.011631	0.010222																				-49.2993	-49.4151		-0.000625	-0.000627		-3e-05	0
						-259.399	-207.52											0.011639	0.010229																				-49.2472	-49.3605		-0.000628	-0.000631		-2.9e-05	0
						-195.312	-210.571											0.011646	0.010237																				-49.1973	-49.3082		-0.000632	-0.000634		-2.8e-05	0
						-158.691	-201.416											0.011654	0.010245																				-49.1496	-49.258		-0.000635	-0.000637		-2.8e-05	0
						-225.83	-192.261											0.011661	0.010252																				-49.1039	-49.2099		-0.000638	-0.000641		-2.7e-05	0
						-152.588	-228.882											0.011669	0.01026																				-49.0604	-49.1638		-0.000641	-0.000644		-2.7e-05	0
						-213.623	-201.416											0.011677	0.010268																				-49.0188	-49.1197		-0.000644	-0.000647		-2.6e-05	0
						-231.934	-167.847											0.011684	0.010275																				-48.9791	-49.0775		-0.000646	-0.000649		-2.6e-05	0
						-192.261	-152.588											0.011692	0.010283																				-48.9413	-49.0372		-0.000649	-0.000652		-2.5e-05	0
						-183.105	-161.743											0.0117	0.010291																				-48.9053	-48.9987		-0.000652	-0.000655		-2.5e-05	0
						-213.623	-189.209											0.011707	0.010299																				-48.8711	-48.9619		-0.000654	-0.000657		-2.4e-05	0
						-155.64	-189.209											0.011715	0.010307																				-48.8386	-48.9268		-0.000656	-0.00066		-2.4e-05	0
						-106.812	-192.261											0.011723	0.010314																				-48.8078	-48.8934		-0.000659	-0.000662		-2.3e-05	0
						-234.985	-234.985											0.011731	0.010322																				-48.7786	-48.8617		-0.000661	-0.000664		-2.3e-05	0
						-128.174	-140.381											0.011739	0.01033																				-48.751	-48.8315		-0.000663	-0.000666		-2.2e-05	0
						-186.157	-164.795											0.011746	0.010338																				-48.7249	-48.8028		-0.000665	-0.000669		-2.2e-05	0
						-228.882	-189.209											0.011754	0.010346																				-48.7004	-48.7756		-0.000667	-0.000671		-2.1e-05	0
						-164.795	-155.64											0.011762	0.010354																				-48.6773	-48.7499		-0.000669	-0.000672		-2.1e-05	0
						-195.312	-192.261											0.01177	0.010362																				-48.6557	-48.7257		-0.00067	-0.000674		-2e-05	0
						-195.312	-195.312											0.011778	0.01037																				-48.6355	-48.7028		-0.000672	-0.000676		-2e-05	0
						-164.795	-195.312											0.011786	0.010378																				-48.6166	-48.6812		-0.000674	-0.000678		-1.9e-05	0
						-198.364	-186.157											0.011794	0.010386																				-48.5991	-48.661		-0.000675	-0.000679		-1.9e-05	0
						-204.468	-189.209											0.011801	0.010394																				-48.5828	-48.6421		-0.000677	-0.000681		-1.9e-05	0
						-195.312	-180.054											0.011809	0.010402																				-48.5679	-48.6244		-0.000678	-0.000682		-1.8e-05	0
						-207.52	-210.571											0.011817	0.01041																				-48.5541	-48.608		-0.000679	-0.000684		-1.8e-05	0
						-256.348	-225.83											0.011825	0.010418																				-48.5416	-48.5928		-0.000681	-0.000685		-1.8e-05	0
						-164.795	-167.847											0.011833	0.010426																				-48.5303	-48.5787		-0.000682	-0.000686		-1.7e-05	0
						-216.675	-173.95											0.011841	0.010434																				-48.5201	-48.5658		-0.000683	-0.000688		-1.7e-05	0
						-204.468	-192.261											0.011849	0.010442																				-48.511	-48.5541		-0.000684	-0.000689		-1.6e-05	0
						-250.244	-183.105											0.011857	0.01045																				-48.5031	-48.5434		-0.000685	-0.00069		-1.6e-05	0
						-228.882	-180.054											0.011865	0.010458																				-48.4962	-48.5338		-0.000686	-0.000691		-1.6e-05	0
						-186.157	-192.261											0.011873	0.010466																				-48.4904	-48.5253		-0.000687	-0.000692		-1.5e-05	0
						-219.727	-149.536											0.011881	0.010474																				-48.4856	-48.5178		-0.000687	-0.000693		-1.5e-05	0
						-216.675	-195.312											0.011889	0.010482																				-48.4819	-48.5113		-0.000688	-0.000693		-1.5e-05	0
						-219.727	-155.64											0.011897	0.01049																				-48.4791	-48.5058		-0.000689	-0.000694		-1.5e-05	0
						-189.209	-155.64											0.011905	0.010498																				-48.4773	-48.5012		-0.000689	-0.000695		-1.4e-05	0
						-189.209	-152.588											0.011913	0.010507																				-48.4764	-48.4976		-0.00069	-0.000695		-1.4e-05	0
						-265.503	-180.054											0.011921	0.010515																				-48.4764	-48.495		-0.00069	-0.000696		-1.4e-05	0
						-207.52	-112.915											0.011929	0.010523																				-48.4774	-48.4932		-0.000691	-0.000697		-1.3e-05	0
						-228.882	-173.95											0.011937	0.010531																				-48.4792	-48.4924		-0.000691	-0.000697		-1.3e-05	0
						-247.192	-201.416											0.011945	0.010539																				-48.482	-48.4924		-0.000691	-0.000697		-1.3e-05	0
						-198.364	-158.691											0.011953	0.010547																				-48.4855	-48.4933		-0.000692	-0.000698		-1.3e-05	0
						-180.054	-170.898											0.011961	0.010555																				-48.4899	-48.495		-0.000692	-0.000698		-1.2e-05	0
						-201.416	-247.192											0.011969	0.010563																				-48.4951	-48.4976		-0.000692	-0.000698		-1.2e-05	0
						-213.623	-149.536											0.011977	0.010571																				-48.5011	-48.5009		-0.000692	-0.000699		-1.2e-05	0
						-247.192	-146.484											0.011985	0.01058																				-48.5079	-48.5051		-0.000692	-0.000699		-1.2e-05	0
						-155.64	-195.312											0.011993	0.010588																				-48.5155	-48.51		-0.000693	-0.000699		-1.1e-05	0
						-259.399	-164.795											0.012001	0.010596																				-48.5238	-48.5157		-0.000693	-0.000699		-1.1e-05	0
						-231.934	-164.795											0.012008	0.010604																				-48.5328	-48.5222		-0.000693	-0.000699		-1.1e-05	0
						-228.882	-219.727											0.012016	0.010612																				-48.5426	-48.5293		-0.000692	-0.000699		-1.1e-05	0
						-173.95	-155.64											0.012024	0.01062																				-48.553	-48.5372		-0.000692	-0.000699		-1e-05	0
						-201.416	-204.468											0.012032	0.010628																				-48.5642	-48.5458		-0.000692	-0.000699		-1e-05	0
						-189.209	-195.312											0.01204	0.010636																				-48.576	-48.5551		-0.000692	-0.000699		-1e-05	0
						-195.312	-219.727											0.012048	0.010645																				-48.5885	-48.5651		-0.000692	-0.000699		-1e-05	0
						-195.312	-158.691											0.012056	0.010653																				-48.6016	-48.5757		-0.000692	-0.000699		-1e-05	0
						-222.778	-238.037											0.012064	0.010661																				-48.6154	-48.587		-0.000691	-0.000699		-9e-06	0
						-204.468	-216.675											0.012072	0.010669																				-48.6297	-48.599		-0.000691	-0.000698		-9e-06	0
						-149.536	-195.312											0.01208	0.010677																				-48.6447	-48.6115		-0.000691	-0.000698		-9e-06	0
						-198.364	-228.882											0.012088	0.010685																				-48.6603	-48.6247		-0.00069	-0.000698		-9e-06	0
						-228.882	-189.209											0.012096	0.010693																				-48.6765	-48.6385		-0.00069	-0.000697		-9e-06	0
						-222.778	-225.83											0.012104	0.010701																				-48.6932	-48.6529		-0.000689	-0.000697		-8e-06	0
						-207.52	-201.416											0.012112	0.010709																				-48.7105	-48.6678		-0.000689	-0.000696		-8e-06	0
						-183.105	-219.727											0.01212	0.010717																				-48.7284	-48.6833		-0.000688	-0.000696		-8e-06	0
						-198.364	-161.743											0.012128	0.010726																				-48.7468	-48.6994		-0.000688	-0.000696		-8e-06	0
						-195.312	-180.054											0.012136	0.010734																				-48.7657	-48.7161		-0.000687	-0.000695		-8e-06	0
						-225.83	-201.416											0.012144	0.010742																				-48.7851	-48.7332		-0.000686	-0.000694		-8e-06	0
						-192.261	-173.95											0.012152	0.01075																				-48.805	-48.7509		-0.000686	-0.000694		-7e-06	0
						-231.934	-186.157											0.01216	0.010758																				-48.8254	-48.7691		-0.000685	-0.000693		-7e-06	0
						-216.675	-146.484											0.012168	0.010766																				-48.8463	-48.7878		-0.000684	-0.000693		-7e-06	0
						-177.002	-177.002											0.012175	0.010774																				-48.8676	-48.8071		-0.000684	-0.000692		-7e-06	0
						-186.157	-149.536											0.012183	0.010782																				-48.8895	-48.8268		-0.000683	-0.000691		-7e-06	0
						-253.296	-170.898											0.012191	0.01079																				-48.9117	-48.8469		-0.000682	-0.000691		-7e-06	0
						-198.364	-146.484											0.012199	0.010798																				-48.9344	-48.8676		-0.000681	-0.00069		-7e-06	0
						-265.503	-180.054											0.012207	0.010806																				-48.9576	-48.8887		-0.000681	-0.000689		-6e-06	0
						-210.571	-152.588											0.012215	0.010814																				-48.9811	-48.9102		-0.00068	-0.000688		-6e-06	0
						-201.416	-137.329											0.012223	0.010822																				-49.0051	-48.9322		-0.000679	-0.000688		-6e-06	0
						-207.52	-173.95											0.012231	0.01083																				-49.0295	-48.9546		-0.000678	-0.000687		-6e-06	0
						-195.312	-189.209											0.012238	0.010838																				-49.0543	-48.9774		-0.000677	-0.000686		-6e-06	0
						-158.691	-161.743											0.012246	0.010846																				-49.0794	-49.0007		-0.000676	-0.000685		-6e-06	0
						-216.675	-216.675											0.012254	0.010854																				-49.1049	-49.0243		-0.000675	-0.000684		-6e-06	0
						-167.847	-192.261											0.012262	0.010862																				-49.1308	-49.0484		-0.000674	-0.000683		-6e-06	0
						-192.261	-195.312											0.01227	0.01087																				-49.1571	-49.0728		-0.000673	-0.000682		-5e-06	0
						-225.83	-183.105											0.012278	0.010878																				-49.1837	-49.0976		-0.000672	-0.000681		-5e-06	0
						-216.675	-204.468											0.012285	0.010886																				-49.2107	-49.1228		-0.000671	-0.00068		-5e-06	0
						-183.105	-164.795											0.012293	0.010894																				-49.2379	-49.1483		-0.00067	-0.00068		-5e-06	0
						-201.416	-183.105											0.012301	0.010902																				-49.2656	-49.1742		-0.000669	-0.000679		-5e-06	0
						-183.105	-173.95											0.012309	0.01091																				-49.2935	-49.2004		-0.000668	-0.000678		-5e-06	0
						-201.416	-131.226											0.012317	0.010918																				-49.3217	-49.227		-0.000667	-0.000676		-5e-06	0
						-170.898	-186.157											0.012324	0.010926																				-49.3503	-49.2539		-0.000666	-0.000675		-5e-06	0
						-238.037	-167.847											0.012332	0.010934																				-49.3791	-49.2811		-0.000665	-0.000674		-5e-06	0
						-164.795	-158.691											0.01234	0.010942																				-49.4083	-49.3087		-0.000664	-0.000673		-5e-06	0
						-170.898	-201.416											0.012348	0.01095																				-49.4377	-49.3365		-0.000663	-0.000672		-4e-06	0
						-219.727	-189.209											0.012355	0.010958																				-49.4674	-49.3647		-0.000662	-0.000671		-4e-06	0
						-146.484	-180.054											0.012363	0.010966																				-49.4973	-49.3931		-0.000661	-0.00067		-4e-06	0
						-177.002	-155.64											0.012371	0.010973																				-49.5275	-49.4219		-0.000659	-0.000669		-4e-06	0
						-216.675	-183.105											0.012378	0.010981																				-49.558	-49.4509		-0.000658	-0.000668		-4e-06	0
						-195.312	-134.277											0.012386	0.010989																				-49.5887	-49.4802		-0.000657	-0.000667		-4e-06	0
						-192.261	-192.261											0.012394	0.010997																				-49.6197	-49.5097		-0.000656	-0.000665		-4e-06	0
						-222.778	-177.002											0.012401	0.011005																				-49.6509	-49.5396		-0.000655	-0.000664		-4e-06	0
						-146.484	-158.691											0.012409	0.011013																				-49.6824	-49.5696		-0.000653	-0.000663		-4e-06	0
						-173.95	-195.312											0.012417	0.01102																				-49.714	-49.6		-0.000652	-0.000662		-4e-06	0
						-253.296	-180.054											0.012424	0.011028																				-49.7459	-49.6305		-0.000651	-0.000661		-4e-06	0
						-161.743	-189.209											0.012432	0.011036																				-49.778	-49.6613		-0.00065	-0.000659		-4e-06	0
						-134.277	-164.795											0.01244	0.011044																				-49.8103	-49.6924		-0.000648	-0.000658		-3e-06	0
						-265.503	-183.105											0.012447	0.011052																				-49.8428	-49.7236		-0.000647	-0.000657		-3e-06	0
						-183.105	-167.847											0.012455	0.011059																				-49.8755	-49.7551		-0.000646	-0.000656		-3e-06	0
						-192.261	-180.054											0.012462	0.011067																				-49.9084	-49.7868		-0.000645	-0.000654		-3e-06	0
						-189.209	-207.52											0.01247	0.011075																				-49.9414	-49.8187		-0.000643	-0.000653		-3e-06	0
						-161.743	-152.588											0.012478	0.011083																				-49.9747	-49.8508		-0.000642	-0.000652		-3e-06	0
						-125.122	-222.778											0.012485	0.01109																				-50.0081	-49.8831		-0.000641	-0.000651		-3e-06	0
						-225.83	-189.209											0.012493	0.011098																				-50.0417	-49.9155		-0.00064	-0.000649		-3e-06	0
						-152.588	-213.623											0.0125	0.011106																				-50.0754	-49.9482		-0.000638	-0.000648		-3e-06	0
						-180.054	-201.416											0.012508	0.011114																				-50.1094	-49.9811		-0.000637	-0.000647		-3e-06	0
						-149.536	-244.141											0.012515	0.011121																				-50.1434	-50.0141		-0.000636	-0.000645		-3e-06	0
						-119.019	-189.209											0.012523	0.011129																				-50.1776	-50.0473		-0.000634	-0.000644		-3e-06	0
						-170.898	-225.83											0.01253	0.011137																				-50.212	-50.0806		-0.000633	-0.000643		-3e-06	0
						-164.795	-222.778											0.012538	0.011144																				-50.2465	-50.1142		-0.000632	-0.000642		-3e-06	0
						-213.623	-183.105											0.012545	0.011152																				-50.2811	-50.1478		-0.00063	-0.00064		-3e-06	0
						-177.002	-228.882											0.012553	0.01116																				-50.3159	-50.1817		-0.000629	-0.000639		-3e-06	0
						-238.037	-180.054											0.01256	0.011167																				-50.3508	-50.2156		-0.000628	-0.000638		-2e-06	0
						-225.83	-186.157											0.012568	0.011175																				-50.3858	-50.2498		-0.000626	-0.000636		-2e-06	0
						-222.778	-186.157											0.012575	0.011183																				-50.4209	-50.284		-0.000625	-0.000635		-2e-06	0
						-286.865	-241.089											0.012582	0.01119																				-50.4562	-50.3184		-0.000624	-0.000634		-2e-06	0
						-247.192	-189.209											0.01259	0.011198																				-50.4915	-50.3529		-0.000622	-0.000632		-2e-06	0
						-219.727	-146.484											0.012597	0.011205																				-50.527	-50.3876		-0.000621	-0.000631		-2e-06	0
						-238.037	-210.571											0.012605	0.011213																				-50.5626	-50.4223		-0.000619	-0.000629		-2e-06	0
						-231.934	-173.95											0.012612	0.01122																				-50.5982	-50.4572		-0.000618	-0.000628		-2e-06	0
						-189.209	-140.381											0.012619	0.011228																				-50.634	-50.4922		-0.000617	-0.000627		-2e-06	0
						-250.244	-231.934											0.012627	0.011236																				-50.6698	-50.5273		-0.000615	-0.000625		-2e-06	0
						-161.743	-152.588											0.012634	0.011243																				-50.7058	-50.5625		-0.000614	-0.000624		-2e-06	0
						-216.675	-155.64											0.012641	0.011251																				-50.7418	-50.5978		-0.000613	-0.000623		-2e-06	0
						-234.985	-189.209											0.012649	0.011258																				-50.7779	-50.6332		-0.000611	-0.000621		-2e-06	0
						-122.07	-155.64											0.012656	0.011266																				-50.814	-50.6686		-0.00061	-0.00062		-2e-06	0
						-195.312	-167.847											0.012663	0.011273																				-50.8503	-50.7042		-0.000608	-0.000618		-2e-06	0
						-201.416	-213.623											0.012671	0.011281																				-50.8866	-50.7399		-0.000607	-0.000617		-2e-06	0
						-167.847	-140.381											0.012678	0.011288																				-50.923	-50.7756		-0.000606	-0.000616		-2e-06	0
						-180.054	-152.588											0.012685	0.011295																				-50.9594	-50.8114		-0.000604	-0.000614		-2e-06	0
						-210.571	-204.468											0.012693	0.011303																				-50.9959	-50.8473		-0.000603	-0.000613		-2e-06	0
						-173.95	-155.64											0.0127	0.01131																				-51.0324	-50.8833		-0.000602	-0.000612		-2e-06	0
						-137.329	-155.64											0.012707	0.011318																				-51.0691	-50.9193		-0.0006	-0.00061		-2e-06	0
						-213.623	-228.882											0.012714	0.011325																				-51.1057	-50.9554		-0.000599	-0.000609		-2e-06	0
						-134.277	-155.64											0.012721	0.011333																				-51.1424	-50.9916		-0.000597	-0.000607		-2e-06	0
						-170.898	-183.105											0.012729	0.01134																				-51.1792	-51.0278		-0.000596	-0.000606		-2e-06	0
						-146.484	-177.002											0.012736	0.011347																				-51.216	-51.0641		-0.000595	-0.000605		-2e-06	0
						-177.002	-173.95											0.012743	0.011355																				-51.2528	-51.1004		-0.000593	-0.000603		-1e-06	0
						-158.691	-183.105											0.01275	0.011362																				-51.2896	-51.1368		-0.000592	-0.000602		-1e-06	0
						-195.312	-219.727											0.012757	0.011369																				-51.3265	-51.1732		-0.00059	-0.0006		-1e-06	0
						-131.226	-170.898											0.012765	0.011377																				-51.3635	-51.2096		-0.000589	-0.000599		-1e-06	0
						-152.588	-170.898											0.012772	0.011384																				-51.4004	-51.2461		-0.000588	-0.000598		-1e-06	0
						-186.157	-183.105											0.012779	0.011391																				-51.4374	-51.2827		-0.000586	-0.000596		-1e-06	0
						-186.157	-167.847											0.012786	0.011399																				-51.4744	-51.3192		-0.000585	-0.000595		-1e-06	0
						-134.277	-177.002											0.012793	0.011406																				-51.5114	-51.3558		-0.000584	-0.000593		-1e-06	0
						-189.209	-253.296											0.0128	0.011413																				-51.5484	-51.3925		-0.000582	-0.000592		-1e-06	0
						-146.484	-183.105											0.012807	0.01142																				-51.5855	-51.4291		-0.000581	-0.000591		-1e-06	0
						-170.898	-201.416											0.012814	0.011428																				-51.6226	-51.4658		-0.000579	-0.000589		-1e-06	0
						-189.209	-183.105											0.012821	0.011435																				-51.6596	-51.5025		-0.000578	-0.000588		-1e-06	0
						-158.691	-195.312											0.012828	0.011442																				-51.6967	-51.5393		-0.000577	-0.000587		-1e-06	0
						-152.588	-180.054											0.012835	0.011449																				-51.7338	-51.576		-0.000575	-0.000585		-1e-06	0
						-119.019	-192.261											0.012842	0.011457																				-51.7709	-51.6128		-0.000574	-0.000584		-1e-06	0
						-189.209	-173.95											0.012849	0.011464																				-51.808	-51.6495		-0.000573	-0.000582		-1e-06	0
						-213.623	-183.105											0.012856	0.011471																				-51.8451	-51.6863		-0.000571	-0.000581		-1e-06	0
						-161.743	-192.261											0.012863	0.011478																				-51.8822	-51.7231		-0.00057	-0.00058		-1e-06	0
						-216.675	-170.898											0.01287	0.011485																				-51.9193	-51.7599		-0.000569	-0.000578		-1e-06	0
						-198.364	-180.054											0.012877	0.011493																				-51.9563	-51.7967		-0.000567	-0.000577		-1e-06	0
						-198.364	-189.209											0.012884	0.0115																				-51.9934	-51.8335		-0.000566	-0.000576		-1e-06	0
						-207.52	-143.433											0.012891	0.011507																				-52.0305	-51.8703		-0.000564	-0.000574		-1e-06	0
						-134.277	-189.209											0.012898	0.011514																				-52.0675	-51.907		-0.000563	-0.000573		-1e-06	0
						-219.727	-201.416											0.012905	0.011521																				-52.1046	-51.9438		-0.000562	-0.000571		-1e-06	0
						-204.468	-189.209											0.012912	0.011528																				-52.1416	-51.9806		-0.00056	-0.00057		-1e-06	0
						-207.52	-204.468											0.012919	0.011535																				-52.1786	-52.0174		-0.000559	-0.000569		-1e-06	0
						-192.261	-167.847											0.012926	0.011542																				-52.2156	-52.0541		-0.000558	-0.000567		-1e-06	0
						-231.934	-195.312											0.012933	0.011549																				-52.2525	-52.0909		-0.000556	-0.000566		-1e-06	0
						-149.536	-201.416											0.01294	0.011556																				-52.2894	-52.1276		-0.000555	-0.000565		-1e-06	0
						-161.743	-195.312											0.012947	0.011564																				-52.3264	-52.1643		-0.000554	-0.000563		-1e-06	0
						-238.037	-158.691											0.012953	0.011571																				-52.3632	-52.201		-0.000552	-0.000562		-1e-06	0
						-186.157	-195.312											0.01296	0.011578																				-52.4001	-52.2377		-0.000551	-0.000561		-1e-06	0
						-231.934	-177.002											0.012967	0.011585																				-52.4369	-52.2744		-0.00055	-0.000559		-1e-06	0
						-259.399	-152.588											0.012974	0.011592																				-52.4737	-52.311		-0.000549	-0.000558		-1e-06	0
						-173.95	-204.468											0.012981	0.011599																				-52.5105	-52.3476		-0.000547	-0.000557		-1e-06	0
						-183.105	-195.312											0.012988	0.011606																				-52.5472	-52.3842		-0.000546	-0.000555		-1e-06	0
						-219.727	-195.312											0.012994	0.011613																				-52.5839	-52.4207		-0.000545	-0.000554		-1e-06	0
						-241.089	-186.157											0.013001	0.01162																				-52.6206	-52.4572		-0.000543	-0.000553		-1e-06	0
						-183.105	-225.83											0.013008	0.011627																				-52.6572	-52.4937		-0.000542	-0.000551		-1e-06	0
						-228.882	-183.105											0.013015	0.011633																				-52.6938	-52.5302		-0.000541	-0.00055		-1e-06	0
						-119.019	-186.157											0.013021	0.01164																				-52.7303	-52.5666		-0.000539	-0.000549		-1e-06	0
						-100.708	-186.157											0.013028	0.011647																				-52.7668	-52.603		-0.000538	-0.000548		-1e-06	0
						-213.623	-180.054											0.013035	0.011654																				-52.8033	-52.6394		-0.000537	-0.000546		-1e-06	0
						-128.174	-201.416											0.013042	0.011661																				-52.8397	-52.6757		-0.000536	-0.000545		-1e-06	0
						-158.691	-198.364											0.013048	0.011668																				-52.8761	-52.7119		-0.000534	-0.000544		-1e-06	0
						-137.329	-192.261											0.013055	0.011675																				-52.9124	-52.7482		-0.000533	-0.000542		-1e-06	0
						-125.122	-170.898											0.013062	0.011682																				-52.9487	-52.7844		-0.000532	-0.000541		-1e-06	0
						-155.64	-210.571											0.013068	0.011689																				-52.9849	-52.8205		-0.000531	-0.00054		-1e-06	0
						-164.795	-198.364											0.013075	0.011695																				-53.0211	-52.8566		-0.000529	-0.000538		-1e-06	0
						-158.691	-204.468											0.013082	0.011702																				-53.0572	-52.8927		-0.000528	-0.000537		-1e-06	0
						-143.433	-207.52											0.013088	0.011709																				-53.0933	-52.9287		-0.000527	-0.000536		-1e-06	0
						-204.468	-177.002											0.013095	0.011716																				-53.1293	-52.9647		-0.000525	-0.000535		-1e-06	0
						-173.95	-167.847											0.013102	0.011723																				-53.1653	-53.0006		-0.000524	-0.000533		-1e-06	0
						-213.623	-161.743											0.013108	0.01173																				-53.2012	-53.0364		-0.000523	-0.000532		-1e-06	0
						-216.675	-131.226											0.013115	0.011736																				-53.237	-53.0723		-0.000522	-0.000531		0	0
						-109.863	-177.002											0.013122	0.011743																				-53.2728	-53.108		-0.000521	-0.00053		0	0
						-225.83	-186.157											0.013128	0.01175																				-53.3086	-53.1437		-0.000519	-0.000528		0	0
						-173.95	-152.588											0.013135	0.011757																				-53.3443	-53.1794		-0.000518	-0.000527		0	0
						-152.588	-210.571											0.013141	0.011763																				-53.3799	-53.215		-0.000517	-0.000526		0	0
						-189.209	-161.743											0.013148	0.01177																				-53.4155	-53.2505		-0.000516	-0.000525		0	0
						-259.399	-213.623											0.013154	0.011777																				-53.451	-53.286		-0.000514	-0.000523		0	0
						-180.054	-195.312											0.013161	0.011784																				-53.4864	-53.3215		-0.000513	-0.000522		0	0
						-192.261	-186.157											0.013168	0.01179																				-53.5218	-53.3568		-0.000512	-0.000521		0	0
						-219.727	-189.209											0.013174	0.011797																				-53.5571	-53.3921		-0.000511	-0.00052		0	0
						-192.261	-134.277											0.013181	0.011804																				-53.5924	-53.4274		-0.00051	-0.000519		0	0
						-109.863	-158.691											0.013187	0.01181																				-53.6275	-53.4626		-0.000508	-0.000517		0	0
						-250.244	-183.105											0.013194	0.011817																				-53.6627	-53.4977		-0.000507	-0.000516		0	0
						-152.588	-177.002											0.0132	0.011824																				-53.6977	-53.5328		-0.000506	-0.000515		0	0
						-177.002	-134.277											0.013206	0.01183																				-53.7327	-53.5678		-0.000505	-0.000514		0	0
						-198.364	-177.002											0.013213	0.011837																				-53.7676	-53.6027		-0.000504	-0.000513		0	0
						-137.329	-161.743											0.013219	0.011844																				-53.8025	-53.6376		-0.000503	-0.000511		0	0
						-167.847	-155.64											0.013226	0.01185																				-53.8373	-53.6724		-0.000501	-0.00051		0	0
						-183.105	-204.468											0.013232	0.011857																				-53.872	-53.7072		-0.0005	-0.000509		0	0
						-158.691	-143.433											0.013239	0.011864																				-53.9067	-53.7419		-0.000499	-0.000508		0	0
						-213.623	-155.64											0.013245	0.01187																				-53.9412	-53.7765		-0.000498	-0.000507		0	0
						-210.571	-158.691											0.013252	0.011877																				-53.9758	-53.811		-0.000497	-0.000505		0	0
						-140.381	-170.898											0.013258	0.011883																				-54.0102	-53.8455		-0.000496	-0.000504		0	0
						-164.795	-201.416											0.013264	0.01189																				-54.0446	-53.8799		-0.000494	-0.000503		0	0
						-250.244	-186.157											0.013271	0.011896																				-54.0789	-53.9142		-0.000493	-0.000502		0	0
						-85.4492	-170.898											0.013277	0.011903																				-54.1131	-53.9485		-0.000492	-0.000501		0	0
						-183.105	-201.416											0.013283	0.011909																				-54.1472	-53.9827		-0.000491	-0.0005		0	0
						-158.691	-170.898											0.01329	0.011916																				-54.1813	-54.0168		-0.00049	-0.000498		0	0
						-170.898	-183.105											0.013296	0.011922																				-54.2153	-54.0509		-0.000489	-0.000497		0	0
						-146.484	-186.157											0.013302	0.011929																				-54.2492	-54.0849		-0.000488	-0.000496		0	0
						-213.623	-213.623											0.013309	0.011935																				-54.2831	-54.1188		-0.000487	-0.000495		0	0
						-173.95	-198.364											0.013315	0.011942																				-54.3169	-54.1526		-0.000485	-0.000494		0	0
						-183.105	-189.209											0.013321	0.011948																				-54.3506	-54.1864		-0.000484	-0.000493		0	0
						-228.882	-225.83											0.013328	0.011955																				-54.3842	-54.2201		-0.000483	-0.000492		0	0
						-167.847	-180.054											0.013334	0.011961																				-54.4178	-54.2537		-0.000482	-0.000491		0	0
						-180.054	-177.002											0.01334	0.011968																				-54.4512	-54.2872		-0.000481	-0.000489		0	0
						-222.778	-201.416											0.013346	0.011974																				-54.4846	-54.3207		-0.00048	-0.000488		0	0
						-183.105	-189.209											0.013353	0.011981																				-54.5179	-54.3541		-0.000479	-0.000487		0	0
						-173.95	-192.261											0.013359	0.011987																				-54.5512	-54.3874		-0.000478	-0.000486		0	0
						-231.934	-219.727											0.013365	0.011994																				-54.5844	-54.4207		-0.000477	-0.000485		0	0
						-204.468	-186.157											0.013371	0.012																				-54.6174	-54.4538		-0.000476	-0.000484		0	0
						-222.778	-216.675											0.013378	0.012006																				-54.6504	-54.4869		-0.000475	-0.000483		0	0
						-250.244	-216.675											0.013384	0.012013																				-54.6834	-54.5199		-0.000474	-0.000482		0	0
						-198.364	-164.795											0.01339	0.012019																				-54.7162	-54.5528		-0.000472	-0.000481		0	0
						-146.484	-170.898											0.013396	0.012025																				-54.749	-54.5857		-0.000471	-0.00048		0	0
						-167.847	-195.312											0.013402	0.012032																				-54.7817	-54.6185		-0.00047	-0.000479		0	0
						-173.95	-140.381											0.013409	0.012038																				-54.8143	-54.6512		-0.000469	-0.000478		0	0
						-183.105	-173.95											0.013415	0.012045																				-54.8468	-54.6838		-0.000468	-0.000476		0	0
						-146.484	-204.468											0.013421	0.012051																				-54.8793	-54.7163		-0.000467	-0.000475		0	0
						-198.364	-140.381											0.013427	0.012057																				-54.9117	-54.7488		-0.000466	-0.000474		0	0
						-158.691	-173.95											0.013433	0.012064																				-54.944	-54.7812		-0.000465	-0.000473		0	0
						-234.985	-170.898											0.013439	0.01207																				-54.9762	-54.8135		-0.000464	-0.000472		0	0
						-198.364	-122.07											0.013446	0.012076																				-55.0083	-54.8457		-0.000463	-0.000471		0	0
						-186.157	-195.312											0.013452	0.012082																				-55.0403	-54.8779		-0.000462	-0.00047		0	0
						-186.157	-198.364											0.013458	0.012089																				-55.0723	-54.9099		-0.000461	-0.000469		0	0
						-189.209	-155.64											0.013464	0.012095																				-55.1042	-54.9419		-0.00046	-0.000468		0	0
						-173.95	-201.416											0.01347	0.012101																				-55.136	-54.9738		-0.000459	-0.000467		0	0
						-183.105	-177.002											0.013476	0.012107																				-55.1677	-55.0056		-0.000458	-0.000466		0	0
						-164.795	-140.381											0.013482	0.012114																				-55.1994	-55.0374		-0.000457	-0.000465		0	0
						-128.174	-173.95											0.013488	0.01212																				-55.2309	-55.069		-0.000456	-0.000464		0	0
						-219.727	-167.847											0.013494	0.012126																				-55.2624	-55.1006		-0.000455	-0.000463		0	0
						-207.52	-146.484											0.0135	0.012132																				-55.2938	-55.1321		-0.000454	-0.000462		0	0
						-131.226	-152.588											0.013506	0.012139																				-55.3251	-55.1635		-0.000453	-0.000461		0	0
						-177.002	-216.675											0.013512	0.012145																				-55.3564	-55.1949		-0.000452	-0.00046		0	0
						-173.95	-164.795											0.013518	0.012151																				-55.3875	-55.2261		-0.000451	-0.000459		0	0
						-183.105	-183.105											0.013524	0.012157																				-55.4186	-55.2573		-0.00045	-0.000458		0	0
						-186.157	-155.64											0.01353	0.012163																				-55.4496	-55.2884		-0.000449	-0.000457		0	0
						-195.312	-167.847											0.013536	0.01217																				-55.4805	-55.3194		-0.000448	-0.000456		0	0
						-170.898	-192.261											0.013542	0.012176																				-55.5113	-55.3503		-0.000447	-0.000455		0	0
						-216.675	-198.364											0.013548	0.012182																				-55.542	-55.3812		-0.000446	-0.000454		0	0
						-177.002	-189.209											0.013554	0.012188																				-55.5727	-55.412		-0.000445	-0.000453		0	0
						-177.002	-161.743											0.01356	0.012194																				-55.6033	-55.4426		-0.000444	-0.000452		0	0
						-161.743	-164.795											0.013566	0.0122																				-55.6337	-55.4732		-0.000443	-0.000451		0	0
						-210.571	-161.743											0.013572	0.012206																				-55.6641	-55.5038		-0.000443	-0.00045		0	0
						-207.52	-164.795											0.013578	0.012213																				-55.6945	-55.5342		-0.000442	-0.000449		0	0
						-201.416	-198.364											0.013584	0.012219																				-55.7247	-55.5646		-0.000441	-0.000448		0	0
						-204.468	-164.795											0.01359	0.012225																				-55.7549	-55.5948		-0.00044	-0.000447		0	0
						-137.329	-189.209											0.013596	0.012231																				-55.785	-55.625		-0.000439	-0.000446		0	0
						-216.675	-192.261											0.013602	0.012237																				-55.815	-55.6551		-0.000438	-0.000445		0	0
						-238.037	-198.364											0.013608	0.012243																				-55.8449	-55.6852		-0.000437	-0.000445		0	0
						-173.95	-213.623											0.013614	0.012249																				-55.8747	-55.7151		-0.000436	-0.000444		0	0
						-195.312	-186.157											0.01362	0.012255																				-55.9044	-55.745		-0.000435	-0.000443		0	0
						-231.934	-189.209											0.013625	0.012261																				-55.9341	-55.7748		-0.000434	-0.000442		0	0
						-241.089	-198.364											0.013631	0.012267																				-55.9637	-55.8045		-0.000433	-0.000441		0	0
						-222.778	-210.571											0.013637	0.012273																				-55.9932	-55.8341		-0.000432	-0.00044		0	0
						-201.416	-231.934											0.013643	0.012279																				-56.0226	-55.8636		-0.000432	-0.000439		0	0
						-198.364	-216.675											0.013649	0.012285																				-56.0519	-55.8931		-0.000431	-0.000438		0	0
						-244.141	-213.623											0.013655	0.012291																				-56.0812	-55.9224		-0.00043	-0.000437		0	0
						-222.778	-216.675											0.01366	0.012297																				-56.1104	-55.9517		-0.000429	-0.000436		0	0
						-180.054	-192.261											0.013666	0.012303																				-56.1394	-55.9809		-0.000428	-0.000435		0	0
						-170.898	-207.52											0.013672	0.012309																				-56.1685	-56.0101		-0.000427	-0.000434		0	0
						-238.037	-192.261											0.013678	0.012315																				-56.1974	-56.0391		-0.000426	-0.000434		0	0
						-155.64	-186.157											0.013684	0.012321																				-56.2262	-56.0681		-0.000425	-0.000433		0	0
						-158.691	-198.364											0.01369	0.012327																				-56.255	-56.097		-0.000425	-0.000432		0	0
						-192.261	-167.847											0.013695	0.012333																				-56.2837	-56.1258		-0.000424	-0.000431		0	0
						-183.105	-189.209											0.013701	0.012339																				-56.3123	-56.1545		-0.000423	-0.00043		0	0
						-161.743	-210.571											0.013707	0.012345																				-56.3408	-56.1831		-0.000422	-0.000429		0	0
						-213.623	-180.054											0.013713	0.012351																				-56.3692	-56.2117		-0.000421	-0.000428		0	0
						-164.795	-183.105											0.013718	0.012357																				-56.3975	-56.2401		-0.00042	-0.000427		0	0
						-155.64	-167.847											0.013724	0.012363																				-56.4258	-56.2685		-0.000419	-0.000427		0	0
						-207.52	-173.95											0.01373	0.012369																				-56.454	-56.2968		-0.000419	-0.000426		0	0
						-173.95	-161.743											0.013736	0.012374																				-56.4821	-56.3251		-0.000418	-0.000425		0	0
						-198.364	-167.847											0.013741	0.01238																				-56.5101	-56.3532		-0.000417	-0.000424		0	0
						-164.795	-152.588											0.013747	0.012386																				-56.5381	-56.3813		-0.000416	-0.000423		0	0
						-134.277	-164.795											0.013753	0.012392																				-56.5659	-56.4093		-0.000415	-0.000422		0	0
						-177.002	-134.277											0.013758	0.012398																				-56.5937	-56.4372		-0.000414	-0.000421		0	0
						-250.244	-180.054											0.013764	0.012404																				-56.6214	-56.465		-0.000414	-0.000421		0	0
						-103.76	-164.795											0.01377	0.01241																				-56.6491	-56.4928		-0.000413	-0.00042		0	0
						-195.312	-170.898											0.013775	0.012416																				-56.6766	-56.5204		-0.000412	-0.000419		0	0
						-262.451	-177.002											0.013781	0.012421																				-56.7041	-56.548		-0.000411	-0.000418		0	0
						-173.95	-173.95											0.013787	0.012427																				-56.7314	-56.5755		-0.00041	-0.000417		0	0
						-146.484	-170.898											0.013792	0.012433																				-56.7587	-56.6029		-0.000409	-0.000416		0	0
						-195.312	-177.002											0.013798	0.012439																				-56.786	-56.6303		-0.000409	-0.000416		0	0
						-183.105	-161.743											0.013804	0.012445																				-56.8131	-56.6576		-0.000408	-0.000415		0	0
						-225.83	-186.157											0.013809	0.01245																				-56.8402	-56.6847		-0.000407	-0.000414		0	0
						-219.727	-183.105											0.013815	0.012456																				-56.8671	-56.7118		-0.000406	-0.000413		0	0
						-183.105	-177.002											0.013821	0.012462																				-56.894	-56.7389		-0.000405	-0.000412		0	0
						-213.623	-170.898											0.013826	0.012468																				-56.9209	-56.7658		-0.000405	-0.000412		0	0
						-247.192	-195.312											0.013832	0.012474																				-56.9476	-56.7927		-0.000404	-0.000411		0	0
						-225.83	-164.795											0.013837	0.012479																				-56.9743	-56.8195		-0.000403	-0.00041		0	0
						-268.555	-183.105											0.013843	0.012485																				-57.0009	-56.8462		-0.000402	-0.000409		0	0
						-186.157	-195.312											0.013849	0.012491																				-57.0274	-56.8728		-0.000402	-0.000408		0	0
						-283.813	-173.95											0.013854	0.012497																				-57.0538	-56.8994		-0.000401	-0.000408		0	0
						-222.778	-195.312											0.01386	0.012502																				-57.0802	-56.9259		-0.0004	-0.000407		0	0
						-234.985	-180.054											0.013865	0.012508																				-57.1064	-56.9522		-0.000399	-0.000406		0	0
						-207.52	-173.95											0.013871	0.012514																				-57.1326	-56.9786		-0.000398	-0.000405		0	0
						-167.847	-173.95											0.013876	0.01252																				-57.1587	-57.0048		-0.000398	-0.000404		0	0
						-219.727	-204.468											0.013882	0.012525																				-57.1848	-57.031		-0.000397	-0.000404		0	0
						-192.261	-170.898											0.013888	0.012531																				-57.2107	-57.0571		-0.000396	-0.000403		0	0
						-198.364	-198.364											0.013893	0.012537																				-57.2366	-57.0831		-0.000395	-0.000402		0	0
						-180.054	-198.364											0.013899	0.012542																				-57.2624	-57.109		-0.000395	-0.000401		0	0
						-161.743	-186.157											0.013904	0.012548																				-57.2882	-57.1349		-0.000394	-0.000401		0	0
						-186.157	-149.536											0.01391	0.012554																				-57.3138	-57.1606		-0.000393	-0.0004		0	0
						-305.176	-207.52											0.013915	0.012559																				-57.3394	-57.1863		-0.000392	-0.000399		0	0
						-161.743	-198.364											0.013921	0.012565																				-57.3649	-57.212		-0.000392	-0.000398		0	0
						-198.364	-122.07											0.013926	0.012571																				-57.3903	-57.2375		-0.000391	-0.000398		0	0
						-253.296	-213.623											0.013932	0.012576																				-57.4157	-57.263		-0.00039	-0.000397		0	0
						-170.898	-155.64											0.013937	0.012582																				-57.4409	-57.2884		-0.00039	-0.000396		0	0
						-210.571	-143.433											0.013943	0.012588																				-57.4661	-57.3137		-0.000389	-0.000395		0	0
						-299.072	-198.364											0.013948	0.012593																				-57.4913	-57.3389		-0.000388	-0.000395		0	0
						-231.934	-152.588											0.013953	0.012599																				-57.5163	-57.3641		-0.000387	-0.000394		0	0
						-207.52	-231.934											0.013959	0.012604																				-57.5413	-57.3892		-0.000387	-0.000393		0	0
						-268.555	-198.364											0.013964	0.01261																				-57.5662	-57.4142		-0.000386	-0.000392		0	0
						-155.64	-195.312											0.01397	0.012616																				-57.591	-57.4392		-0.000385	-0.000392		0	0
						-225.83	-180.054											0.013975	0.012621																				-57.6157	-57.464		-0.000385	-0.000391		0	0
						-198.364	-195.312											0.013981	0.012627																				-57.6404	-57.4888		-0.000384	-0.00039		0	0
						-195.312	-210.571											0.013986	0.012632																				-57.665	-57.5136		-0.000383	-0.00039		0	0
						-225.83	-177.002											0.013991	0.012638																				-57.6895	-57.5382		-0.000382	-0.000389		0	0
						-265.503	-192.261											0.013997	0.012644																				-57.714	-57.5628		-0.000382	-0.000388		0	0
						-177.002	-192.261											0.014002	0.012649																				-57.7383	-57.5873		-0.000381	-0.000387		0	0
						-210.571	-177.002											0.014008	0.012655																				-57.7627	-57.6117		-0.00038	-0.000387		0	0
						-247.192	-204.468											0.014013	0.01266																				-57.7869	-57.636		-0.00038	-0.000386		0	0
						-222.778	-192.261											0.014018	0.012666																				-57.811	-57.6603		-0.000379	-0.000385		0	0
						-265.503	-201.416											0.014024	0.012671																				-57.7758	-57.6254		-0.000383	-0.000389		0	0
						-210.571	-204.468											0.014029	0.012677																				-57.6951	-57.5451		-0.000388	-0.000394		0	0
						-201.416	-158.691											0.014035	0.012683																				-57.5788	-57.4292		-0.000393	-0.0004		0	0
						-201.416	-183.105											0.01404	0.012688																				-57.4344	-57.2854		-0.0004	-0.000406		0	0
						-228.882	-204.468											0.014046	0.012694																				-57.2685	-57.1201		-0.000407	-0.000414		0	0
						-201.416	-173.95											0.014052	0.0127																				-57.0861	-56.9383		-0.000414	-0.000421		0	0
						-170.898	-201.416											0.014058	0.012706																				-56.8916	-56.7445		-0.000422	-0.000429		0	0
						-180.054	-195.312											0.014064	0.012712																				-56.6883	-56.5419		-0.00043	-0.000437		0	0
						-170.898	-173.95											0.01407	0.012718																				-56.4792	-56.3336		-0.000438	-0.000446		0	0
						-231.934	-146.484											0.014076	0.012725																				-56.2666	-56.1216		-0.000447	-0.000454		0	0
						-219.727	-189.209											0.014082	0.012731																				-56.0522	-55.908		-0.000455	-0.000463		0	0
						-140.381	-149.536											0.014088	0.012738																				-55.8377	-55.6942		-0.000464	-0.000471		0	0
						-177.002	-161.743											0.014095	0.012744																				-55.6242	-55.4814		-0.000473	-0.00048		0	0
						-210.571	-180.054											0.014101	0.012751																				-55.4126	-55.2706		-0.000481	-0.000489		0	0
						-192.261	-152.588											0.014108	0.012758																				-55.2038	-55.0625		-0.00049	-0.000498		0	0
						-195.312	-195.312											0.014115	0.012765																				-54.9984	-54.8578		-0.000498	-0.000506		0	0
						-219.727	-189.209											0.014122	0.012772																				-54.7968	-54.6569		-0.000507	-0.000515		0	0
						-204.468	-149.536											0.014128	0.012779																				-54.5993	-54.4601		-0.000515	-0.000524		0	0
						-262.451	-170.898											0.014135	0.012786																				-54.4063	-54.2677		-0.000524	-0.000532		0	0
						-228.882	-173.95											0.014143	0.012794																				-54.2179	-54.0799		-0.000532	-0.00054		0	0
						-219.727	-164.795											0.01415	0.012801																				-54.0342	-53.8969		-0.00054	-0.000549		0	0
						-183.105	-186.157											0.014157	0.012809																				-53.8553	-53.7186		-0.000548	-0.000557		0	0
						-210.571	-170.898											0.014164	0.012816																				-53.6813	-53.5452		-0.000556	-0.000565		0	0
						-238.037	-161.743											0.014172	0.012824																				-53.5122	-53.3766		-0.000564	-0.000573		0	0
						-143.433	-177.002											0.014179	0.012831																				-53.3479	-53.2128		-0.000572	-0.000581		0	0
						-204.468	-204.468											0.014187	0.012839																				-53.1884	-53.0539		-0.000579	-0.000588		0	0
						-253.296	-137.329											0.014194	0.012847																				-53.0337	-52.8996		-0.000587	-0.000596		0	0
						-222.778	-195.312											0.014202	0.012855																				-52.8836	-52.75		-0.000594	-0.000603		0	0
						-155.64	-183.105											0.01421	0.012863																				-52.7382	-52.6049		-0.000601	-0.00061		0	0
						-204.468	-173.95											0.014218	0.012871																				-52.5972	-52.4643		-0.000608	-0.000617		0	0
						-180.054	-146.484											0.014226	0.012879																				-52.4606	-52.3281		-0.000615	-0.000624		0	0
						-177.002	-177.002											0.014233	0.012887																				-52.3283	-52.1961		-0.000622	-0.000631		0	0
						-213.623	-143.433											0.014241	0.012895																				-52.2002	-52.0684		-0.000628	-0.000638		0	0
						-222.778	-161.743											0.01425	0.012904																				-52.0762	-51.9446		-0.000635	-0.000644		0	0
						-195.312	-192.261											0.014258	0.012912																				-51.9562	-51.8249		-0.000641	-0.00065		0	0
						-204.468	-173.95											0.014266	0.01292																				-51.8401	-51.7089		-0.000647	-0.000657		0	0
						-201.416	-189.209											0.014274	0.012929																				-51.7277	-51.5967		-0.000653	-0.000663		0	0
						-204.468	-204.468											0.014282	0.012937																				-51.619	-51.4882		-0.000659	-0.000668		0	0
						-241.089	-198.364											0.014291	0.012946																				-51.5139	-51.3832		-0.000664	-0.000674		0	0
						-192.261	-195.312											0.014299	0.012954																				-51.4122	-51.2815		-0.00067	-0.00068		0	0
						-219.727	-201.416											0.014307	0.012963																				-51.3139	-51.1833		-0.000675	-0.000685		0	0
						-201.416	-167.847											0.014316	0.012972																				-51.2188	-51.0882		-0.00068	-0.00069		0	0
						-140.381	-210.571											0.014324	0.01298																				-51.1269	-50.9963		-0.000685	-0.000696		0	0
						-207.52	-201.416											0.014333	0.012989																				-51.0381	-50.9074		-0.00069	-0.000701		0	0
						-170.898	-231.934											0.014341	0.012998																				-50.9523	-50.8214		-0.000695	-0.000706		0	0
						-173.95	-201.416											0.01435	0.013007																				-50.8693	-50.7383		-0.0007	-0.00071		0	0
						-231.934	-201.416											0.014358	0.013015																				-50.7891	-50.658		-0.000704	-0.000715		0	0
						-170.898	-222.778											0.014367	0.013024																				-50.7117	-50.5804		-0.000709	-0.000719		0	0
						-195.312	-183.105											0.014376	0.013033																				-50.6369	-50.5053		-0.000713	-0.000724		0	0
						-173.95	-222.778											0.014385	0.013042																				-50.5646	-50.4328		-0.000717	-0.000728		0	0
						-222.778	-207.52											0.014393	0.013051																				-50.4948	-50.3627		-0.000722	-0.000732		0	0
						-155.64	-167.847											0.014402	0.01306																				-50.4274	-50.295		-0.000725	-0.000736		0	0
						-225.83	-180.054											0.014411	0.013069																				-50.3624	-50.2296		-0.000729	-0.00074		0	0
						-198.364	-201.416											0.01442	0.013078																				-50.2996	-50.1664		-0.000733	-0.000744		0	0
						-149.536	-195.312											0.014429	0.013087																				-50.239	-50.1054		-0.000737	-0.000748		0	0
						-274.658	-189.209											0.014438	0.013097																				-50.1805	-50.0465		-0.00074	-0.000751		0	0
						-180.054	-189.209											0.014447	0.013106																				-50.1241	-49.9896		-0.000743	-0.000755		0	0
						-177.002	-207.52											0.014455	0.013115																				-50.0697	-49.9347		-0.000747	-0.000758		0	0
						-225.83	-170.898											0.014464	0.013124																				-50.0173	-49.8818		-0.00075	-0.000761		0	0
						-180.054	-201.416											0.014473	0.013133																				-49.9667	-49.8307		-0.000753	-0.000764		0	0
						-115.967	-131.226											0.014482	0.013143																				-49.918	-49.7814		-0.000756	-0.000767		0	0
						-177.002	-173.95											0.014492	0.013152																				-49.8711	-49.7339		-0.000759	-0.00077		0	0
						-192.261	-189.209											0.014501	0.013161																				-49.826	-49.6881		-0.000762	-0.000773		0	0
						-161.743	-161.743											0.01451	0.013171																				-49.7825	-49.644		-0.000764	-0.000776		0	0
						-213.623	-192.261											0.014519	0.01318																				-49.7407	-49.6015		-0.000767	-0.000778		0	0
						-155.64	-158.691											0.014528	0.013189																				-49.7005	-49.5606		-0.000769	-0.000781		0	0
						-109.863	-183.105											0.014537	0.013199																				-49.6619	-49.5213		-0.000772	-0.000784		0	0
						-189.209	-155.64											0.014546	0.013208																				-49.6248	-49.4835		-0.000774	-0.000786		0	0
						-137.329	-180.054											0.014555	0.013217																				-49.5892	-49.4472		-0.000776	-0.000788		0	0
						-173.95	-167.847											0.014565	0.013227																				-49.555	-49.4123		-0.000779	-0.00079		0	0
						-186.157	-177.002											0.014574	0.013236																				-49.5223	-49.3788		-0.000781	-0.000793		0	0
						-198.364	-192.261											0.014583	0.013246																				-49.491	-49.3467		-0.000783	-0.000795		0	0
						-177.002	-167.847											0.014592	0.013255																				-49.461	-49.3159		-0.000785	-0.000797		0	0
						-143.433	-201.416											0.014602	0.013265																				-49.4323	-49.2864		-0.000786	-0.000798		0	0
						-210.571	-149.536											0.014611	0.013274																				-49.405	-49.2582		-0.000788	-0.0008		0	0
						-177.002	-198.364											0.01462	0.013284																				-49.3789	-49.2313		-0.00079	-0.000802		0	0
						-180.054	-161.743											0.014629	0.013293																				-49.354	-49.2056		-0.000792	-0.000804		0	0
						-210.571	-152.588											0.014639	0.013303																				-49.3303	-49.1812		-0.000793	-0.000805		0	0
						-91.5527	-180.054											0.014648	0.013312																				-49.3079	-49.1578		-0.000795	-0.000807		0	0
						-234.985	-183.105											0.014657	0.013322																				-49.2866	-49.1357		-0.000796	-0.000808		0	0
						-250.244	-173.95											0.014667	0.013332																				-49.2664	-49.1147		-0.000797	-0.00081		0	0
						-180.054	-158.691											0.014676	0.013341																				-49.2473	-49.0947		-0.000799	-0.000811		0	0
						-201.416	-164.795											0.014685	0.013351																				-49.2293	-49.0759		-0.0008	-0.000812		0	0
						-286.865	-173.95											0.014695	0.01336																				-49.2124	-49.0581		-0.000801	-0.000813		0	0
						-137.329	-155.64											0.014704	0.01337																				-49.1966	-49.0414		-0.000802	-0.000815		0	0
						-198.364	-155.64											0.014714	0.01338																				-49.1817	-49.0257		-0.000803	-0.000816		0	0
						-247.192	-210.571											0.014723	0.013389																				-49.1679	-49.011		-0.000804	-0.000817		0	0
						-161.743	-140.381											0.014732	0.013399																				-49.155	-48.9973		-0.000805	-0.000818		0	0
						-234.985	-161.743											0.014742	0.013409																				-49.1432	-48.9846		-0.000806	-0.000818		0	0
						-158.691	-192.261											0.014751	0.013418																				-49.1322	-48.9728		-0.000806	-0.000819		0	0
						-183.105	-131.226											0.014761	0.013428																				-49.1222	-48.962		-0.000807	-0.00082		0	0
						-213.623	-195.312											0.01477	0.013437																				-49.1131	-48.9521		-0.000808	-0.000821		0	0
						-207.52	-195.312											0.014779	0.013447																				-49.105	-48.943		-0.000808	-0.000821		0	0
						-180.054	-143.433											0.014789	0.013457																				-49.0976	-48.9349		-0.000809	-0.000822		0	0
						-161.743	-170.898											0.014798	0.013466																				-49.0912	-48.9276		-0.000809	-0.000823		0	0
						-183.105	-186.157											0.014808	0.013476																				-49.0856	-48.9212		-0.00081	-0.000823		0	0
						-149.536	-152.588											0.014817	0.013486																				-49.0808	-48.9156		-0.00081	-0.000823		0	0
						-195.312	-198.364											0.014827	0.013495																				-49.0769	-48.9109		-0.000811	-0.000824		0	0
						-225.83	-204.468											0.014836	0.013505																				-49.0738	-48.907		-0.000811	-0.000824		0	0
						-173.95	-137.329											0.014845	0.013515																				-49.0714	-48.9038		-0.000811	-0.000824		0	0
						-219.727	-204.468											0.014855	0.013525																				-49.0699	-48.9015		-0.000811	-0.000825		0	0
						-222.778	-195.312											0.014864	0.013534																				-49.0691	-48.8999		-0.000812	-0.000825		0	0
						-170.898	-189.209											0.014874	0.013544																				-49.069	-48.8991		-0.000812	-0.000825		0	0
						-152.588	-186.157											0.014883	0.013554																				-49.0697	-48.8991		-0.000812	-0.000825		0	0
						-192.261	-201.416											0.014893	0.013563																				-49.0711	-48.8997		-0.000812	-0.000825		0	0
						-140.381	-167.847											0.014902	0.013573																				-49.0732	-48.9012		-0.000812	-0.000825		0	0
						-155.64	-192.261											0.014911	0.013583																				-49.076	-48.9033		-0.000812	-0.000825		0	0
						-228.882	-216.675											0.014921	0.013592																				-49.0796	-48.9061		-0.000812	-0.000825		0	0
						-134.277	-186.157											0.01493	0.013602																				-49.0837	-48.9096		-0.000812	-0.000825		0	0
						-183.105	-167.847											0.01494	0.013612																				-49.0886	-48.9138		-0.000811	-0.000825		0	0
						-164.795	-222.778											0.014949	0.013621																				-49.0941	-48.9186		-0.000811	-0.000825		0	0
						-201.416	-180.054											0.014959	0.013631																				-49.1003	-48.9241		-0.000811	-0.000825		0	0
						-180.054	-189.209											0.014968	0.013641																				-49.107	-48.9303		-0.000811	-0.000824		0	0
						-180.054	-192.261											0.014978	0.01365																				-49.1144	-48.9371		-0.00081	-0.000824		0	0
						-177.002	-201.416											0.014987	0.01366																				-49.1225	-48.9445		-0.00081	-0.000824		0	0
						-195.312	-173.95											0.014996	0.01367																				-49.1311	-48.9525		-0.00081	-0.000823		0	0
						-204.468	-180.054											0.015006	0.013679																				-49.1403	-48.9612		-0.000809	-0.000823		0	0
						-198.364	-158.691											0.015015	0.013689																				-49.1501	-48.9704		-0.000809	-0.000822		0	0
						-207.52	-146.484											0.015025	0.013699																				-49.1604	-48.9802		-0.000808	-0.000822		0	0
						-167.847	-228.882											0.015034	0.013708																				-49.1714	-48.9906		-0.000808	-0.000821		0	0
						-186.157	-131.226											0.015043	0.013718																				-49.1828	-49.0016		-0.000807	-0.000821		0	0
						-143.433	-152.588											0.015053	0.013728																				-49.1948	-49.0131		-0.000807	-0.00082		0	0
						-161.743	-170.898											0.015062	0.013737																				-49.2074	-49.0252		-0.000806	-0.00082		0	0
						-164.795	-146.484											0.015072	0.013747																				-49.2205	-49.0378		-0.000805	-0.000819		0	0
						-137.329	-143.433											0.015081	0.013757																				-49.2341	-49.0509		-0.000805	-0.000819		0	0
						-192.261	-198.364											0.01509	0.013766																				-49.2481	-49.0646		-0.000804	-0.000818		0	0
						-189.209	-137.329											0.0151	0.013776																				-49.2627	-49.0787		-0.000803	-0.000817		0	0
						-125.122	-137.329											0.015109	0.013786																				-49.2778	-49.0934		-0.000803	-0.000816		0	0
						-207.52	-180.054											0.015118	0.013795																				-49.2934	-49.1086		-0.000802	-0.000816		0	0
						-198.364	-134.277											0.015128	0.013805																				-49.3094	-49.1242		-0.000801	-0.000815		0	0
						-180.054	-152.588											0.015137	0.013814																				-49.3259	-49.1404		-0.0008	-0.000814		0	0
						-192.261	-219.727											0.015146	0.013824																				-49.3428	-49.157		-0.000799	-0.000813		0	0
						-198.364	-164.795											0.015156	0.013833																				-49.3602	-49.174		-0.000799	-0.000812		0	0
						-201.416	-158.691											0.015165	0.013843																				-49.3781	-49.1915		-0.000798	-0.000811		0	0
						-216.675	-164.795											0.015174	0.013853																				-49.3963	-49.2095		-0.000797	-0.00081		0	0
						-180.054	-180.054											0.015184	0.013862																				-49.415	-49.2279		-0.000796	-0.00081		0	0
						-192.261	-183.105											0.015193	0.013872																				-49.4341	-49.2467		-0.000795	-0.000809		0	0
						-238.037	-170.898											0.015202	0.013881																				-49.4536	-49.266		-0.000794	-0.000808		0	0
						-219.727	-201.416											0.015212	0.013891																				-49.4735	-49.2857		-0.000793	-0.000807		0	0
						-244.141	-177.002											0.015221	0.0139																				-49.4938	-49.3057		-0.000792	-0.000806		0	0
						-231.934	-195.312											0.01523	0.01391																				-49.5145	-49.3262		-0.000791	-0.000805		0	0
						-225.83	-204.468											0.015239	0.013919																				-49.5356	-49.3471		-0.00079	-0.000803		0	0
						-192.261	-213.623											0.015249	0.013929																				-49.557	-49.3684		-0.000789	-0.000802		0	0
						-210.571	-225.83											0.015258	0.013938																				-49.5788	-49.39		-0.000788	-0.000801		0	0
						-204.468	-167.847											0.015267	0.013948																				-49.601	-49.412		-0.000786	-0.0008		0	0
						-152.588	-186.157											0.015276	0.013957																				-49.6235	-49.4344		-0.000785	-0.000799		0	0
						-198.364	-173.95											0.015286	0.013967																				-49.6463	-49.4571		-0.000784	-0.000798		0	0
						-225.83	-161.743											0.015295	0.013976																				-49.6695	-49.4802		-0.000783	-0.000797		0	0
						-143.433	-201.416											0.015304	0.013986																				-49.693	-49.5036		-0.000782	-0.000795		0	0
						-155.64	-173.95											0.015313	0.013995																				-49.7169	-49.5274		-0.000781	-0.000794		0	0
						-225.83	-177.002											0.015322	0.014004																				-49.741	-49.5514		-0.000779	-0.000793		0	0
						-195.312	-192.261											0.015331	0.014014																				-49.7655	-49.5759		-0.000778	-0.000792		0	0
						-177.002	-204.468											0.015341	0.014023																				-49.7903	-49.6006		-0.000777	-0.000791		0	0
						-244.141	-186.157											0.01535	0.014033																				-49.8153	-49.6256		-0.000776	-0.000789		0	0
						-161.743	-189.209											0.015359	0.014042																				-49.8407	-49.651		-0.000775	-0.000788		0	0
						-195.312	-161.743											0.015368	0.014051																				-49.8663	-49.6766		-0.000773	-0.000787		0	0
						-253.296	-186.157											0.015377	0.014061																				-49.8923	-49.7025		-0.000772	-0.000785		0	0
						-161.743	-152.588											0.015386	0.01407																				-49.9185	-49.7287		-0.000771	-0.000784		0	0
						-177.002	-192.261											0.015395	0.014079																				-49.9449	-49.7552		-0.000769	-0.000783		0	0
						-177.002	-192.261											0.015404	0.014089																				-49.9717	-49.782		-0.000768	-0.000781		0	0
						-173.95	-170.898											0.015414	0.014098																				-49.9986	-49.809		-0.000767	-0.00078		0	0
						-201.416	-180.054											0.015423	0.014107																				-50.0259	-49.8363		-0.000765	-0.000779		0	0
						-177.002	-213.623											0.015432	0.014117																				-50.0533	-49.8639		-0.000764	-0.000777		0	0
						-143.433	-167.847											0.015441	0.014126																				-50.0811	-49.8917		-0.000763	-0.000776		0	0
						-189.209	-207.52											0.01545	0.014135																				-50.109	-49.9197		-0.000761	-0.000774		0	0
						-170.898	-219.727											0.015459	0.014145																				-50.1372	-49.948		-0.00076	-0.000773		0	0
						-149.536	-173.95											0.015468	0.014154																				-50.1656	-49.9765		-0.000758	-0.000772		0	0
						-213.623	-222.778											0.015477	0.014163																				-50.1942	-50.0053		-0.000757	-0.00077		0	0
						-231.934	-213.623											0.015486	0.014172																				-50.223	-50.0343		-0.000756	-0.000769		0	0
						-180.054	-170.898											0.015495	0.014181																				-50.2521	-50.0634		-0.000754	-0.000767		0	0
						-158.691	-238.037											0.015504	0.014191																				-50.2813	-50.0928		-0.000753	-0.000766		0	0
						-216.675	-198.364											0.015513	0.0142																				-50.3107	-50.1224		-0.000751	-0.000764		0	0
						-183.105	-204.468											0.015521	0.014209																				-50.3404	-50.1522		-0.00075	-0.000763		0	0
						-195.312	-195.312											0.01553	0.014218																				-50.3702	-50.1822		-0.000749	-0.000761		0	0
						-158.691	-173.95											0.015539	0.014227																				-50.4002	-50.2124		-0.000747	-0.00076		0	0
						-167.847	-167.847											0.015548	0.014236																				-50.4303	-50.2428		-0.000746	-0.000759		0	0
						-204.468	-180.054											0.015557	0.014246																				-50.4607	-50.2733		-0.000744	-0.000757		0	0
						-173.95	-216.675											0.015566	0.014255																				-50.4912	-50.3041		-0.000743	-0.000756		0	0
						-161.743	-170.898											0.015575	0.014264																				-50.5219	-50.335		-0.000741	-0.000754		0	0
						-204.468	-189.209											0.015584	0.014273																				-50.5527	-50.366		-0.00074	-0.000752		0	0
						-265.503	-177.002											0.015593	0.014282																				-50.5837	-50.3973		-0.000738	-0.000751		0	0
						-128.174	-137.329											0.015601	0.014291																				-50.6148	-50.4286		-0.000737	-0.000749		0	0
						-204.468	-195.312											0.01561	0.0143																				-50.6461	-50.4602		-0.000735	-0.000748		0	0
						-213.623	-146.484											0.015619	0.014309																				-50.6775	-50.4919		-0.000734	-0.000746		0	0
						-204.468	-152.588											0.015628	0.014318																				-50.7091	-50.5237		-0.000732	-0.000745		0	0
						-183.105	-128.174											0.015637	0.014327																				-50.7408	-50.5557		-0.000731	-0.000743		0	0
						-195.312	-152.588											0.015645	0.014336																				-50.7726	-50.5878		-0.000729	-0.000742		0	0
						-152.588	-128.174											0.015654	0.014345																				-50.8045	-50.62		-0.000728	-0.00074		0	0
						-231.934	-173.95											0.015663	0.014354																				-50.8366	-50.6524		-0.000726	-0.000739		0	0
						-195.312	-186.157											0.015671	0.014363																				-50.8688	-50.6848		-0.000725	-0.000737		0	0
						-195.312	-180.054											0.01568	0.014372																				-50.9011	-50.7174		-0.000723	-0.000736		0	0
						-238.037	-180.054											0.015689	0.014381																				-50.9335	-50.7502		-0.000722	-0.000734		0	0
						-241.089	-146.484											0.015698	0.01439																				-50.966	-50.783		-0.00072	-0.000732		0	0
						-183.105	-134.277											0.015706	0.014399																				-50.9986	-50.8159		-0.000719	-0.000731		0	0
						-180.054	-170.898											0.015715	0.014408																				-51.0313	-50.8489		-0.000717	-0.000729		0	0
						-241.089	-204.468											0.015724	0.014417																				-51.0641	-50.8821		-0.000716	-0.000728		0	0
						-241.089	-158.691											0.015732	0.014426																				-51.097	-50.9153		-0.000714	-0.000726		0	0
						-204.468	-210.571											0.015741	0.014434																				-51.13	-50.9486		-0.000712	-0.000725		0	0
						-207.52	-228.882											0.015749	0.014443																				-51.1631	-50.982		-0.000711	-0.000723		0	0
						-170.898	-158.691											0.015758	0.014452																				-51.1962	-51.0155		-0.000709	-0.000721		0	0
						-192.261	-158.691											0.015767	0.014461																				-51.2295	-51.0491		-0.000708	-0.00072		0	0
						-247.192	-180.054											0.015775	0.01447																				-51.2627	-51.0828		-0.000706	-0.000718		0	0
						-137.329	-161.743											0.015784	0.014479																				-51.2961	-51.1165		-0.000705	-0.000717		0	0
						-155.64	-186.157											0.015792	0.014487																				-51.3296	-51.1503		-0.000703	-0.000715		0	0
						-204.468	-177.002											0.015801	0.014496																				-51.3631	-51.1841		-0.000702	-0.000714		0	0
						-192.261	-158.691											0.015809	0.014505																				-51.3966	-51.2181		-0.0007	-0.000712		0	0
						-149.536	-186.157											0.015818	0.014514																				-51.4302	-51.2521		-0.000699	-0.00071		0	0
						-210.571	-195.312											0.015826	0.014522																				-51.4639	-51.2861		-0.000697	-0.000709		0	0
						-192.261	-192.261											0.015835	0.014531																				-51.4976	-51.3202		-0.000696	-0.000707		0	0
						-192.261	-219.727											0.015843	0.01454																				-51.5314	-51.3544		-0.000694	-0.000706		0	0
						-213.623	-173.95											0.015852	0.014549																				-51.5652	-51.3886		-0.000692	-0.000704		0	0
						-207.52	-207.52											0.01586	0.014557																				-51.5991	-51.4228		-0.000691	-0.000702		0	0
						-234.985	-189.209											0.015869	0.014566																				-51.633	-51.4571		-0.000689	-0.000701		0	0
						-219.727	-207.52											0.015877	0.014575																				-51.6669	-51.4914		-0.000688	-0.000699		0	0
						-238.037	-177.002											0.015886	0.014583																				-51.7009	-51.5258		-0.000686	-0.000698		0	0
						-219.727	-183.105											0.015894	0.014592																				-51.7349	-51.5602		-0.000685	-0.000696		0	0
						-180.054	-234.985											0.015902	0.0146																				-51.769	-51.5947		-0.000683	-0.000695		0	0
						-201.416	-155.64											0.015911	0.014609																				-51.8031	-51.6291		-0.000682	-0.000693		0	0
						-170.898	-207.52											0.015919	0.014618																				-51.8372	-51.6636		-0.00068	-0.000691		0	0
						-216.675	-161.743											0.015927	0.014626																				-51.8713	-51.6981		-0.000679	-0.00069		0	0
						-210.571	-161.743											0.015936	0.014635																				-51.9054	-51.7327		-0.000677	-0.000688		0	0
						-225.83	-201.416											0.015944	0.014643																				-51.9396	-51.7672		-0.000676	-0.000687		0	0
						-216.675	-149.536											0.015952	0.014652																				-51.9737	-51.8018		-0.000674	-0.000685		0	0
						-244.141	-186.157											0.015961	0.01466																				-52.0079	-51.8364		-0.000673	-0.000684		0	0
						-180.054	-195.312											0.015969	0.014669																				-52.0421	-51.871		-0.000671	-0.000682		0	0
						-207.52	-247.192											0.015977	0.014677																				-52.0763	-51.9056		-0.00067	-0.000681		0	0
						-213.623	-158.691											0.015986	0.014686																				-52.1105	-51.9402		-0.000668	-0.000679		0	0
						-173.95	-207.52											0.015994	0.014694																				-52.1448	-51.9749		-0.000667	-0.000677		0	0
						-238.037	-210.571											0.016002	0.014703																				-52.179	-52.0095		-0.000665	-0.000676		0	0
						-180.054	-189.209											0.01601	0.014711																				-52.2132	-52.0441		-0.000664	-0.000674		0	0
						-186.157	-180.054											0.016018	0.01472																				-52.2474	-52.0787		-0.000662	-0.000673		0	0
						-213.623	-189.209											0.016027	0.014728																				-52.2816	-52.1134		-0.000661	-0.000671		0	0
						-225.83	-186.157											0.016035	0.014737																				-52.3159	-52.148		-0.000659	-0.00067		0	0
						-192.261	-189.209											0.016043	0.014745																				-52.3501	-52.1826		-0.000658	-0.000668		0	0
						-183.105	-180.054											0.016051	0.014753																				-52.3843	-52.2172		-0.000656	-0.000667		0	0
						-222.778	-155.64											0.016059	0.014762																				-52.4184	-52.2518		-0.000655	-0.000665		0	0
						-173.95	-155.64											0.016067	0.01477																				-52.4526	-52.2864		-0.000653	-0.000664		0	0
						-234.985	-167.847											0.016076	0.014778																				-52.4868	-52.3209		-0.000652	-0.000662		0	0
						-216.675	-177.002											0.016084	0.014787																				-52.5209	-52.3555		-0.00065	-0.000661		0	0
						-201.416	-164.795											0.016092	0.014795																				-52.5551	-52.39		-0.000649	-0.000659		0	0
						-204.468	-195.312											0.0161	0.014803																				-52.5892	-52.4245		-0.000647	-0.000658		0	0
						-195.312	-143.433											0.016108	0.014812																				-52.6232	-52.459		-0.000646	-0.000656		0	0
						-225.83	-192.261											0.016116	0.01482																				-52.6573	-52.4935		-0.000644	-0.000655		0	0
						-234.985	-177.002											0.016124	0.014828																				-52.6913	-52.5279		-0.000643	-0.000653		0	0
						-219.727	-155.64											0.016132	0.014836																				-52.7254	-52.5624		-0.000641	-0.000652		0	0
						-170.898	-170.898											0.01614	0.014845																				-52.7594	-52.5968		-0.00064	-0.00065		0	0
						-195.312	-189.209											0.016148	0.014853																				-52.7933	-52.6311		-0.000638	-0.000649		0	0
						-259.399	-140.381											0.016156	0.014861																				-52.8272	-52.6654		-0.000637	-0.000647		0	0
						-213.623	-183.105											0.016164	0.014869																				-52.8611	-52.6997		-0.000636	-0.000646		0	0
						-213.623	-195.312											0.016172	0.014878																				-52.895	-52.734		-0.000634	-0.000644		0	0
						-207.52	-152.588											0.01618	0.014886																				-52.9288	-52.7682		-0.000633	-0.000643		0	0
						-173.95	-198.364											0.016188	0.014894																				-52.9626	-52.8024		-0.000631	-0.000641		0	0
						-177.002	-216.675											0.016196	0.014902																				-52.9964	-52.8366		-0.00063	-0.00064		0	0
						-241.089	-164.795											0.016204	0.01491																				-53.0301	-52.8707		-0.000628	-0.000638		0	0
						-204.468	-213.623											0.016212	0.014918																				-53.0638	-52.9048		-0.000627	-0.000637		0	0
						-170.898	-192.261											0.01622	0.014927																				-53.0974	-52.9388		-0.000626	-0.000635		0	0
						-231.934	-189.209											0.016228	0.014935																				-53.1311	-52.9728		-0.000624	-0.000634		0	0
						-177.002	-164.795											0.016235	0.014943																				-53.1646	-53.0068		-0.000623	-0.000633		0	0
						-183.105	-186.157											0.016243	0.014951																				-53.1981	-53.0407		-0.000621	-0.000631		0	0
						-207.52	-177.002											0.016251	0.014959																				-53.2316	-53.0745		-0.00062	-0.00063		0	0
						-140.381	-189.209											0.016259	0.014967																				-53.265	-53.1083		-0.000619	-0.000628		0	0
						-195.312	-164.795											0.016267	0.014975																				-53.2984	-53.1421		-0.000617	-0.000627		0	0
						-238.037	-189.209											0.016275	0.014983																				-53.3317	-53.1758		-0.000616	-0.000625		0	0
						-137.329	-177.002											0.016282	0.014991																				-53.365	-53.2095		-0.000614	-0.000624		0	0
						-265.503	-180.054											0.01629	0.014999																				-53.3983	-53.2431		-0.000613	-0.000623		0	0
						-189.209	-177.002											0.016298	0.015007																				-53.4315	-53.2767		-0.000612	-0.000621		0	0
						-158.691	-170.898											0.016306	0.015015																				-53.4646	-53.3102		-0.00061	-0.00062		0	0
						-234.985	-131.226											0.016314	0.015023																				-53.4977	-53.3436		-0.000609	-0.000618		0	0
						-216.675	-201.416											0.016321	0.015031																				-53.5307	-53.377		-0.000608	-0.000617		0	0
						-173.95	-198.364											0.016329	0.015039																				-53.5637	-53.4104		-0.000606	-0.000616		0	0
						-234.985	-177.002											0.016337	0.015047																				-53.5966	-53.4437		-0.000605	-0.000614		0	0
						-192.261	-195.312											0.016345	0.015055																				-53.6295	-53.4769		-0.000603	-0.000613		0	0
						-167.847	-155.64											0.016352	0.015063																				-53.6623	-53.5101		-0.000602	-0.000611		0	0
						-201.416	-204.468											0.01636	0.015071																				-53.695	-53.5432		-0.000601	-0.00061		0	0
						-213.623	-195.312											0.016368	0.015079																				-53.7277	-53.5762		-0.000599	-0.000609		0	0
						-106.812	-173.95											0.016375	0.015087																				-53.7603	-53.6092		-0.000598	-0.000607		0	0
						-164.795	-152.588											0.016383	0.015094																				-53.7929	-53.6422		-0.000597	-0.000606		0	0
						-167.847	-173.95											0.016391	0.015102																				-53.8254	-53.675		-0.000596	-0.000605		0	0
						-167.847	-146.484											0.016398	0.01511																				-53.8579	-53.7079		-0.000594	-0.000603		0	0
						-183.105	-152.588											0.016406	0.015118																				-53.8903	-53.7406		-0.000593	-0.000602		0	0
						-210.571	-158.691											0.016413	0.015126																				-53.9226	-53.7733		-0.000592	-0.000601		0	0
						-170.898	-186.157											0.016421	0.015134																				-53.9549	-53.8059		-0.00059	-0.000599		0	0
						-198.364	-192.261											0.016429	0.015141																				-53.9871	-53.8385		-0.000589	-0.000598		0	0
						-177.002	-234.985											0.016436	0.015149																				-54.0192	-53.8709		-0.000588	-0.000597		0	0
						-183.105	-186.157											0.016444	0.015157																				-54.0513	-53.9034		-0.000586	-0.000595		0	0
						-201.416	-250.244											0.016451	0.015165																				-54.0833	-53.9357		-0.000585	-0.000594		0	0
						-207.52	-204.468											0.016459	0.015172																				-54.1153	-53.968		-0.000584	-0.000593		0	0
						-216.675	-201.416											0.016466	0.01518																				-54.1472	-54.0002		-0.000583	-0.000591		0	0
						-192.261	-201.416											0.016474	0.015188																				-54.179	-54.0324		-0.000581	-0.00059		0	0
						-216.675	-198.364											0.016481	0.015196																				-54.2107	-54.0645		-0.00058	-0.000589		0	0
						-189.209	-192.261											0.016489	0.015203																				-54.2424	-54.0965		-0.000579	-0.000588		0	0
						-225.83	-238.037											0.016496	0.015211																				-54.274	-54.1284		-0.000578	-0.000586		0	0
						-213.623	-231.934											0.016504	0.015219																				-54.3056	-54.1603		-0.000576	-0.000585		0	0
						-225.83	-186.157											0.016511	0.015226																				-54.3371	-54.1921		-0.000575	-0.000584		0	0
						-189.209	-201.416											0.016519	0.015234																				-54.3685	-54.2238		-0.000574	-0.000582		0	0
						-198.364	-213.623											0.016526	0.015242																				-54.3998	-54.2555		-0.000573	-0.000581		0	0
						-180.054	-201.416											0.016534	0.015249																				-54.4311	-54.2871		-0.000571	-0.00058		0	0
						-219.727	-170.898											0.016541	0.015257																				-54.4623	-54.3186		-0.00057	-0.000579		0	0
						-207.52	-225.83											0.016549	0.015265																				-54.4934	-54.35		-0.000569	-0.000577		0	0
						-219.727	-164.795											0.016556	0.015272																				-54.5245	-54.3814		-0.000568	-0.000576		0	0
						-186.157	-170.898											0.016563	0.01528																				-54.5555	-54.4127		-0.000566	-0.000575		0	0
						-213.623	-210.571											0.016571	0.015288																				-54.5864	-54.4439		-0.000565	-0.000574		0	0
						-112.915	-173.95											0.016578	0.015295																				-54.6172	-54.4751		-0.000564	-0.000572		0	0
						-234.985	-192.261											0.016585	0.015303																				-54.648	-54.5062		-0.000563	-0.000571		0	0
						-219.727	-207.52											0.016593	0.01531																				-54.6787	-54.5372		-0.000562	-0.00057		0	0
						-143.433	-146.484											0.0166	0.015318																				-54.7093	-54.5681		-0.00056	-0.000569		0	0
						-234.985	-198.364											0.016607	0.015325																				-54.7399	-54.599		-0.000559	-0.000568		0	0
						-186.157	-186.157											0.016615	0.015333																				-54.7704	-54.6297		-0.000558	-0.000566		0	0
						-207.52	-164.795											0.016622	0.01534																				-54.8008	-54.6604		-0.000557	-0.000565		0	0
						-167.847	-201.416											0.016629	0.015348																				-54.8311	-54.6911		-0.000556	-0.000564		0	0
						-210.571	-213.623											0.016637	0.015355																				-54.8614	-54.7216		-0.000554	-0.000563		0	0
						-161.743	-152.588											0.016644	0.015363																				-54.8916	-54.7521		-0.000553	-0.000562		0	0
						-195.312	-186.157											0.016651	0.01537																				-54.9217	-54.7825		-0.000552	-0.00056		0	0
						-177.002	-195.312											0.016658	0.015378																				-54.9517	-54.8128		-0.000551	-0.000559		0	0
						-146.484	-131.226											0.016666	0.015385																				-54.9817	-54.8431		-0.00055	-0.000558		0	0
						-189.209	-152.588											0.016673	0.015393																				-55.0116	-54.8732		-0.000549	-0.000557		0	0
						-158.691	-207.52											0.01668	0.0154																				-55.0414	-54.9033		-0.000548	-0.000556		0	0
						-192.261	-146.484											0.016687	0.015408																				-55.0711	-54.9333		-0.000546	-0.000554		0	0
						-161.743	-189.209											0.016695	0.015415																				-55.1008	-54.9633		-0.000545	-0.000553		0	0
						-170.898	-167.847											0.016702	0.015422																				-55.1304	-54.9931		-0.000544	-0.000552		0	0
						-189.209	-177.002											0.016709	0.01543																				-55.1599	-55.0229		-0.000543	-0.000551		0	0
						-180.054	-167.847											0.016716	0.015437																				-55.1893	-55.0526		-0.000542	-0.00055		0	0
						-207.52	-207.52											0.016723	0.015445																				-55.2187	-55.0823		-0.000541	-0.000549		0	0
						-161.743	-140.381											0.01673	0.015452																				-55.248	-55.1118		-0.00054	-0.000548		0	0
						-192.261	-195.312											0.016738	0.015459																				-55.2772	-55.1413		-0.000539	-0.000546		0	0
						-189.209	-140.381											0.016745	0.015467																				-55.3063	-55.1707		-0.000537	-0.000545		0	0
						-207.52	-177.002											0.016752	0.015474																				-55.3354	-55.2		-0.000536	-0.000544		0	0
						-167.847	-201.416											0.016759	0.015481																				-55.3644	-55.2292		-0.000535	-0.000543		0	0
						-234.985	-222.778											0.016766	0.015489																				-55.3933	-55.2584		-0.000534	-0.000542		0	0
						-204.468	-155.64											0.016773	0.015496																				-55.4221	-55.2875		-0.000533	-0.000541		0	0
						-134.277	-204.468											0.01678	0.015503																				-55.4509	-55.3165		-0.000532	-0.00054		0	0
						-167.847	-216.675											0.016787	0.01551																				-55.4795	-55.3454		-0.000531	-0.000539		0	0
						-158.691	-189.209											0.016794	0.015518																				-55.5081	-55.3743		-0.00053	-0.000538		0	0
						-146.484	-177.002											0.016801	0.015525																				-55.5367	-55.403		-0.000529	-0.000536		0	0
						-180.054	-201.416											0.016808	0.015532																				-55.5651	-55.4317		-0.000528	-0.000535		0	0
						-222.778	-204.468											0.016815	0.015539																				-55.5935	-55.4603		-0.000527	-0.000534		0	0
						-204.468	-204.468											0.016823	0.015547																				-55.6218	-55.4889		-0.000526	-0.000533		0	0
						-207.52	-216.675											0.01683	0.015554																				-55.65	-55.5173		-0.000524	-0.000532		0	0
						-280.762	-213.623											0.016837	0.015561																				-55.6781	-55.5457		-0.000523	-0.000531		0	0
						-216.675	-170.898											0.016844	0.015568																				-55.7062	-55.574		-0.000522	-0.00053		0	0
						-296.021	-213.623											0.016851	0.015575																				-55.7342	-55.6022		-0.000521	-0.000529		0	0
						-228.882	-204.468											0.016857	0.015583																				-55.7621	-55.6304		-0.00052	-0.000528		0	0
						-213.623	-201.416											0.016864	0.01559																				-55.7899	-55.6584		-0.000519	-0.000527		0	0
						-183.105	-228.882											0.016871	0.015597																				-55.8177	-55.6864		-0.000518	-0.000526		0	0
						-262.451	-170.898											0.016878	0.015604																				-55.8454	-55.7143		-0.000517	-0.000525		0	0
						-183.105	-228.882											0.016885	0.015611																				-55.873	-55.7421		-0.000516	-0.000524		0	0
						-204.468	-222.778											0.016892	0.015618																				-55.9005	-55.7699		-0.000515	-0.000523		0	0
						-238.037	-192.261											0.016899	0.015626																				-55.9279	-55.7976		-0.000514	-0.000522		0	0
						-152.588	-228.882											0.016906	0.015633																				-55.9553	-55.8252		-0.000513	-0.00052		0	0
						-167.847	-234.985											0.016913	0.01564																				-55.9826	-55.8527		-0.000512	-0.000519		0	0
						-180.054	-231.934											0.01692	0.015647																				-56.0098	-55.8801		-0.000511	-0.000518		0	0
						-155.64	-234.985											0.016927	0.015654																				-56.037	-55.9075		-0.00051	-0.000517		0	0
						-183.105	-228.882											0.016934	0.015661																				-56.064	-55.9347		-0.000509	-0.000516		0	0
						-180.054	-201.416											0.01694	0.015668																				-56.091	-55.962		-0.000508	-0.000515		0	0
						-177.002	-210.571											0.016947	0.015675																				-56.118	-55.9891		-0.000507	-0.000514		0	0
						-149.536	-225.83											0.016954	0.015682																				-56.1448	-56.0161		-0.000506	-0.000513		0	0
						-177.002	-201.416											0.016961	0.015689																				-56.1716	-56.0431		-0.000505	-0.000512		0	0
						-134.277	-225.83											0.016968	0.015696																				-56.1982	-56.07		-0.000504	-0.000511		0	0
						-207.52	-216.675											0.016975	0.015703																				-56.2249	-56.0968		-0.000503	-0.00051		0	0
						-213.623	-213.623											0.016981	0.01571																				-56.2514	-56.1235		-0.000502	-0.000509		0	0
						-143.433	-186.157											0.016988	0.015717																				-56.2779	-56.1502		-0.000501	-0.000508		0	0
						-170.898	-213.623											0.016995	0.015724																				-56.3042	-56.1768		-0.0005	-0.000507		0	0
						-177.002	-173.95											0.017002	0.015731																				-56.3305	-56.2033		-0.000499	-0.000506		0	0
						-119.019	-201.416											0.017009	0.015738																				-56.3568	-56.2297		-0.000498	-0.000505		0	0
						-198.364	-210.571											0.017015	0.015745																				-56.3829	-56.2561		-0.000497	-0.000505		0	0
						-207.52	-192.261											0.017022	0.015752																				-56.409	-56.2823		-0.000497	-0.000504		0	0
						-164.795	-189.209											0.017029	0.015759																				-56.435	-56.3085		-0.000496	-0.000503		0	0
						-256.348	-222.778											0.017036	0.015766																				-56.461	-56.3347		-0.000495	-0.000502		0	0
						-186.157	-198.364											0.017042	0.015773																				-56.4868	-56.3607		-0.000494	-0.000501		0	0
						-183.105	-177.002											0.017049	0.01578																				-56.5126	-56.3867		-0.000493	-0.0005		0	0
						-256.348	-213.623											0.017056	0.015787																				-56.5383	-56.4126		-0.000492	-0.000499		0	0
						-192.261	-173.95											0.017062	0.015794																				-56.5639	-56.4384		-0.000491	-0.000498		0	0
						-164.795	-195.312											0.017069	0.015801																				-56.5895	-56.4641		-0.00049	-0.000497		0	0
						-219.727	-219.727											0.017076	0.015807																				-56.615	-56.4898		-0.000489	-0.000496		0	0
						-195.312	-201.416											0.017082	0.015814																				-56.6404	-56.5154		-0.000488	-0.000495		0	0
						-204.468	-213.623											0.017089	0.015821																				-56.6657	-56.5409		-0.000487	-0.000494		0	0
						-186.157	-189.209											0.017096	0.015828																				-56.691	-56.5664		-0.000486	-0.000493		0	0
						-213.623	-204.468											0.017102	0.015835																				-56.7162	-56.5917		-0.000485	-0.000492		0	0
						-158.691	-222.778											0.017109	0.015842																				-56.7413	-56.617		-0.000485	-0.000491		0	0
						-225.83	-192.261											0.017116	0.015849																				-56.7664	-56.6422		-0.000484	-0.00049		0	0
						-192.261	-213.623											0.017122	0.015855																				-56.7913	-56.6674		-0.000483	-0.00049		0	0
						-216.675	-170.898											0.017129	0.015862																				-56.8162	-56.6924		-0.000482	-0.000489		0	0
						-210.571	-222.778											0.017136	0.015869																				-56.841	-56.7174		-0.000481	-0.000488		0	0
						-244.141	-198.364											0.017142	0.015876																				-56.8658	-56.7423		-0.00048	-0.000487		0	0
						-170.898	-198.364											0.017149	0.015883																				-56.8905	-56.7672		-0.000479	-0.000486		0	0
						-164.795	-183.105											0.017155	0.015889																				-56.9151	-56.792		-0.000478	-0.000485		0	0
						-225.83	-238.037											0.017162	0.015896																				-56.9396	-56.8166		-0.000477	-0.000484		0	0
						-143.433	-198.364											0.017168	0.015903																				-56.9641	-56.8413		-0.000477	-0.000483		0	0
						-213.623	-234.985											0.017175	0.01591																				-56.9885	-56.8658		-0.000476	-0.000482		0	0
						-225.83	-231.934											0.017182	0.015916																				-57.0128	-56.8903		-0.000475	-0.000481		0	0
						-183.105	-167.847											0.017188	0.015923																				-57.037	-56.9147		-0.000474	-0.000481		0	0
						-247.192	-201.416											0.017195	0.01593																				-57.0612	-56.939		-0.000473	-0.00048		0	0
						-216.675	-186.157											0.017201	0.015937																				-57.0853	-56.9633		-0.000472	-0.000479		0	0
						-140.381	-140.381											0.017208	0.015943																				-57.1093	-56.9875		-0.000471	-0.000478		0	0
						-204.468	-195.312											0.017214	0.01595																				-57.1333	-57.0116		-0.000471	-0.000477		0	0
						-186.157	-189.209											0.017221	0.015957																				-57.1572	-57.0356		-0.00047	-0.000476		0	0
						-177.002	-161.743											0.017227	0.015963																				-57.181	-57.0596		-0.000469	-0.000475		0	0
						-219.727	-167.847											0.017234	0.01597																				-57.2047	-57.0835		-0.000468	-0.000475		0	0
						-186.157	-189.209											0.01724	0.015977																				-57.2284	-57.1073		-0.000467	-0.000474		0	0
						-183.105	-137.329											0.017247	0.015983																				-57.252	-57.1311		-0.000466	-0.000473		0	0
						-213.623	-192.261											0.017253	0.01599																				-57.2168	-57.0961		-0.00047	-0.000477		0	0
						-210.571	-146.484											0.01726	0.015997																				-57.1365	-57.0161		-0.000475	-0.000482		0	0
						-140.381	-161.743											0.017266	0.016004																				-57.0208	-56.9009		-0.000481	-0.000488		0	0
						-213.623	-155.64											0.017273	0.01601																				-56.8773	-56.7579		-0.000488	-0.000495		0	0
						-192.261	-201.416											0.01728	0.016017																				-56.7124	-56.5935		-0.000496	-0.000503		0	0
						-195.312	-186.157											0.017286	0.016024																				-56.5312	-56.4129		-0.000504	-0.000511		0	0
						-234.985	-198.364											0.017293	0.016032																				-56.3378	-56.2201		-0.000513	-0.000519		0	0
						-173.95	-192.261											0.0173	0.016039																				-56.1358	-56.0187		-0.000521	-0.000529		0	0
						-143.433	-183.105											0.017308	0.016046																				-55.928	-55.8115		-0.000531	-0.000538		0	0
						-210.571	-173.95											0.017315	0.016054																				-55.7166	-55.6007		-0.00054	-0.000547		0	0
						-250.244	-177.002											0.017322	0.016061																				-55.5035	-55.3882		-0.000549	-0.000557		0	0
						-238.037	-164.795											0.01733	0.016069																				-55.2901	-55.1754		-0.000559	-0.000567		0	0
						-247.192	-216.675											0.017337	0.016077																				-55.0777	-54.9636		-0.000569	-0.000576		0	0
						-241.089	-207.52											0.017345	0.016085																				-54.8673	-54.7538		-0.000578	-0.000586		0	0
						-189.209	-189.209											0.017353	0.016093																				-54.6595	-54.5466		-0.000588	-0.000596		0	0
						-241.089	-222.778											0.017361	0.016101																				-54.455	-54.3427		-0.000598	-0.000605		0	0
						-213.623	-259.399											0.017369	0.016109																				-54.2543	-54.1426		-0.000607	-0.000615		0	0
						-152.588	-207.52											0.017377	0.016118																				-54.0577	-53.9465		-0.000617	-0.000625		0	0
						-234.985	-244.141											0.017385	0.016126																				-53.8654	-53.7548		-0.000626	-0.000634		0	0
						-228.882	-222.778											0.017393	0.016135																				-53.6777	-53.5676		-0.000635	-0.000643		0	0
						-192.261	-195.312											0.017402	0.016143																				-53.4947	-53.3851		-0.000644	-0.000653		0	0
						-207.52	-198.364											0.01741	0.016152																				-53.3164	-53.2073		-0.000653	-0.000662		0	0
						-283.813	-180.054											0.017419	0.016161																				-53.1429	-53.0343		-0.000662	-0.000671		0	0
						-216.675	-222.778											0.017427	0.01617																				-52.9743	-52.8661		-0.000671	-0.000679		0	0
						-198.364	-213.623											0.017436	0.016179																				-52.8104	-52.7027		-0.000679	-0.000688		0	0
						-238.037	-210.571											0.017445	0.016188																				-52.6513	-52.544		-0.000688	-0.000696		0	0
						-183.105	-177.002											0.017454	0.016197																				-52.4968	-52.3899		-0.000696	-0.000705		0	0
						-280.762	-204.468											0.017463	0.016206																				-52.347	-52.2405		-0.000704	-0.000713		0	0
						-186.157	-192.261											0.017472	0.016215																				-52.2017	-52.0956		-0.000712	-0.000721		0	0
						-198.364	-152.588											0.017481	0.016225																				-52.0608	-51.9551		-0.000719	-0.000729		0	0
						-210.571	-186.157											0.01749	0.016234																				-51.9244	-51.8189		-0.000727	-0.000736		0	0
						-198.364	-161.743											0.017499	0.016243																				-51.7921	-51.687		-0.000734	-0.000744		0	0
						-195.312	-137.329											0.017508	0.016253																				-51.6641	-51.5592		-0.000742	-0.000751		0	0
						-170.898	-195.312											0.017518	0.016263																				-51.54	-51.4354		-0.000749	-0.000758		0	0
						-210.571	-201.416											0.017527	0.016272																				-51.42	-51.3156		-0.000756	-0.000765		0	0
						-158.691	-146.484											0.017537	0.016282																				-51.3037	-51.1996		-0.000762	-0.000772		0	0
						-161.743	-167.847											0.017546	0.016292																				-51.1913	-51.0874		-0.000769	-0.000778		0	0
						-183.105	-183.105											0.017556	0.016302																				-51.0824	-50.9787		-0.000775	-0.000785		0	0
						-274.658	-155.64											0.017565	0.016311																				-50.9771	-50.8736		-0.000781	-0.000791		0	0
						-225.83	-177.002											0.017575	0.016321																				-50.8753	-50.7719		-0.000788	-0.000797		0	0
						-213.623	-201.416											0.017585	0.016331																				-50.7767	-50.6735		-0.000793	-0.000803		0	0
						-204.468	-155.64											0.017595	0.016341																				-50.6814	-50.5783		-0.000799	-0.000809		0	0
						-210.571	-149.536											0.017604	0.016351																				-50.5893	-50.4862		-0.000805	-0.000815		0	0
						-231.934	-207.52											0.017614	0.016362																				-50.5002	-50.3972		-0.00081	-0.00082		0	0
						-180.054	-192.261											0.017624	0.016372																				-50.4141	-50.3112		-0.000816	-0.000826		0	0
						-131.226	-183.105											0.017634	0.016382																				-50.3309	-50.228		-0.000821	-0.000831		0	0
						-222.778	-192.261											0.017644	0.016392																				-50.2505	-50.1476		-0.000826	-0.000836		0	0
						-170.898	-170.898											0.017654	0.016402																				-50.1728	-50.0699		-0.000831	-0.000841		0	0
						-173.95	-186.157											0.017664	0.016413																				-50.0977	-49.9948		-0.000835	-0.000846		0	0
						-167.847	-177.002											0.017674	0.016423																				-50.0251	-49.9222		-0.00084	-0.00085		0	0
						-201.416	-164.795											0.017684	0.016433																				-49.9551	-49.8521		-0.000844	-0.000855		0	0
						-213.623	-201.416											0.017694	0.016444																				-49.8874	-49.7844		-0.000849	-0.000859		0	0
						-207.52	-167.847											0.017705	0.016454																				-49.8221	-49.719		-0.000853	-0.000863		0	0
						-192.261	-192.261											0.017715	0.016465																				-49.7591	-49.6559		-0.000857	-0.000867		0	0
						-192.261	-231.934											0.017725	0.016475																				-49.6983	-49.5949		-0.000861	-0.000871		0	0
						-189.209	-225.83											0.017735	0.016486																				-49.6396	-49.5361		-0.000865	-0.000875		0	0
						-192.261	-177.002											0.017746	0.016496																				-49.583	-49.4794		-0.000868	-0.000879		0	0
						-146.484	-216.675											0.017756	0.016507																				-49.5285	-49.4247		-0.000872	-0.000883		0	0
						-244.141	-198.364											0.017766	0.016518																				-49.4759	-49.372		-0.000875	-0.000886		0	0
						-149.536	-204.468											0.017777	0.016528																				-49.4252	-49.3211		-0.000879	-0.00089		0	0
						-164.795	-189.209											0.017787	0.016539																				-49.3764	-49.2722		-0.000882	-0.000893		0	0
						-244.141	-219.727											0.017798	0.01655																				-49.3295	-49.2251		-0.000885	-0.000896		0	0
						-164.795	-183.105											0.017808	0.01656																				-49.2843	-49.1797		-0.000888	-0.000899		0	0
						-140.381	-201.416											0.017819	0.016571																				-49.2409	-49.136		-0.000891	-0.000902		0	0
						-207.52	-213.623											0.017829	0.016582																				-49.1991	-49.0941		-0.000894	-0.000905		0	0
						-167.847	-201.416											0.01784	0.016593																				-49.159	-49.0538		-0.000897	-0.000908		0	0
						-112.915	-180.054											0.01785	0.016604																				-49.1206	-49.0151		-0.000899	-0.00091		0	0
						-167.847	-201.416											0.017861	0.016614																				-49.0836	-48.978		-0.000902	-0.000913		0	0
						-195.312	-177.002											0.017871	0.016625																				-49.0483	-48.9424		-0.000904	-0.000915		0	0
						-131.226	-189.209											0.017882	0.016636																				-49.0144	-48.9083		-0.000906	-0.000917		0	0
						-164.795	-228.882											0.017893	0.016647																				-48.982	-48.8756		-0.000909	-0.00092		0	0
						-195.312	-177.002											0.017903	0.016658																				-48.951	-48.8444		-0.000911	-0.000922		0	0
						-173.95	-177.002											0.017914	0.016669																				-48.9214	-48.8146		-0.000913	-0.000924		0	0
						-210.571	-234.985											0.017924	0.01668																				-48.8932	-48.7862		-0.000915	-0.000926		0	0
						-204.468	-195.312											0.017935	0.016691																				-48.8664	-48.7591		-0.000916	-0.000928		0	0
						-167.847	-198.364											0.017946	0.016702																				-48.8408	-48.7333		-0.000918	-0.00093		0	0
						-186.157	-210.571											0.017956	0.016712																				-48.8165	-48.7088		-0.00092	-0.000931		0	0
						-180.054	-189.209											0.017967	0.016723																				-48.7935	-48.6855		-0.000921	-0.000933		0	0
						-183.105	-192.261											0.017978	0.016734																				-48.7717	-48.6635		-0.000923	-0.000934		0	0
						-210.571	-201.416											0.017989	0.016745																				-48.7512	-48.6427		-0.000924	-0.000936		0	0
						-234.985	-186.157											0.017999	0.016756																				-48.7318	-48.623		-0.000926	-0.000937		0	0
						-161.743	-180.054											0.01801	0.016767																				-48.7135	-48.6045		-0.000927	-0.000939		0	0
						-216.675	-238.037											0.018021	0.016778																				-48.6964	-48.5872		-0.000928	-0.00094		0	0
						-256.348	-198.364											0.018032	0.016789																				-48.6804	-48.571		-0.000929	-0.000941		0	0
						-152.588	-195.312											0.018042	0.016801																				-48.6655	-48.5558		-0.000931	-0.000942		0	0
						-225.83	-225.83											0.018053	0.016812																				-48.6516	-48.5417		-0.000932	-0.000943		0	0
						-201.416	-158.691											0.018064	0.016823																				-48.6388	-48.5287		-0.000932	-0.000944		0	0
						-164.795	-207.52											0.018075	0.016834																				-48.627	-48.5167		-0.000933	-0.000945		0	0
						-180.054	-189.209											0.018085	0.016845																				-48.6162	-48.5057		-0.000934	-0.000946		0	0
						-177.002	-195.312											0.018096	0.016856																				-48.6065	-48.4957		-0.000935	-0.000946		0	0
						-164.795	-207.52											0.018107	0.016867																				-48.5976	-48.4866		-0.000935	-0.000947		0	0
						-213.623	-177.002											0.018118	0.016878																				-48.5897	-48.4786		-0.000936	-0.000948		0	0
						-207.52	-201.416											0.018129	0.016889																				-48.5828	-48.4714		-0.000937	-0.000948		0	0
						-149.536	-180.054											0.01814	0.0169																				-48.5767	-48.4651		-0.000937	-0.000949		0	0
						-155.64	-201.416											0.01815	0.016911																				-48.5716	-48.4598		-0.000938	-0.000949		0	0
						-143.433	-213.623											0.018161	0.016922																				-48.5673	-48.4553		-0.000938	-0.00095		0	0
						-146.484	-198.364											0.018172	0.016933																				-48.5639	-48.4517		-0.000938	-0.00095		0	0
						-213.623	-204.468											0.018183	0.016944																				-48.5613	-48.449		-0.000938	-0.00095		0	0
						-192.261	-225.83											0.018194	0.016955																				-48.5596	-48.4471		-0.000939	-0.00095		0	0
						-177.002	-192.261											0.018204	0.016967																				-48.5586	-48.446		-0.000939	-0.000951		0	0
						-204.468	-219.727											0.018215	0.016978																				-48.5585	-48.4457		-0.000939	-0.000951		0	0
						-192.261	-180.054											0.018226	0.016989																				-48.5592	-48.4462		-0.000939	-0.000951		0	0
						-149.536	-167.847											0.018237	0.017																				-48.5606	-48.4474		-0.000939	-0.000951		0	0
						-173.95	-189.209											0.018248	0.017011																				-48.5627	-48.4495		-0.000939	-0.000951		0	0
						-161.743	-186.157											0.018258	0.017022																				-48.5657	-48.4522		-0.000939	-0.000951		0	0
						-180.054	-125.122											0.018269	0.017033																				-48.5693	-48.4557		-0.000939	-0.00095		0	0
						-195.312	-161.743											0.01828	0.017044																				-48.5737	-48.4599		-0.000938	-0.00095		0	0
						-177.002	-158.691											0.018291	0.017055																				-48.5787	-48.4649		-0.000938	-0.00095		0	0
						-146.484	-146.484											0.018302	0.017066																				-48.5844	-48.4705		-0.000938	-0.00095		0	0
						-219.727	-167.847											0.018312	0.017077																				-48.5908	-48.4768		-0.000938	-0.000949		0	0
						-177.002	-216.675											0.018323	0.017088																				-48.5979	-48.4837		-0.000937	-0.000949		0	0
						-152.588	-143.433											0.018334	0.017099																				-48.6056	-48.4913		-0.000937	-0.000949		0	0
						-192.261	-183.105											0.018345	0.017111																				-48.614	-48.4996		-0.000936	-0.000948		0	0
						-247.192	-164.795											0.018356	0.017122																				-48.623	-48.5085		-0.000936	-0.000948		0	0
						-161.743	-180.054											0.018366	0.017133																				-48.6326	-48.518		-0.000935	-0.000947		0	0
						-177.002	-201.416											0.018377	0.017144																				-48.6428	-48.5281		-0.000935	-0.000946		0	0
						-192.261	-201.416											0.018388	0.017155																				-48.6536	-48.5388		-0.000934	-0.000946		0	0
						-137.329	-189.209											0.018399	0.017166																				-48.6649	-48.5501		-0.000933	-0.000945		0	0
						-192.261	-201.416											0.018409	0.017177																				-48.6769	-48.562		-0.000933	-0.000944		0	0
						-213.623	-189.209											0.01842	0.017188																				-48.6894	-48.5744		-0.000932	-0.000944		0	0
						-115.967	-195.312											0.018431	0.017199																				-48.7024	-48.5874		-0.000931	-0.000943		0	0
						-149.536	-180.054											0.018442	0.01721																				-48.716	-48.6009		-0.00093	-0.000942		0	0
						-216.675	-231.934											0.018452	0.017221																				-48.7301	-48.615		-0.00093	-0.000941		0	0
						-103.76	-158.691											0.018463	0.017232																				-48.7447	-48.6296		-0.000929	-0.00094		0	0
						-177.002	-189.209											0.018474	0.017243																				-48.7598	-48.6446		-0.000928	-0.00094		0	0
						-201.416	-207.52											0.018484	0.017254																				-48.7755	-48.6602		-0.000927	-0.000939		0	0
						-170.898	-234.985											0.018495	0.017265																				-48.7916	-48.6763		-0.000926	-0.000938		0	0
						-170.898	-213.623											0.018506	0.017276																				-48.8082	-48.6929		-0.000925	-0.000937		0	0
						-183.105	-256.348											0.018517	0.017286																				-48.8252	-48.7099		-0.000924	-0.000936		0	0
						-161.743	-198.364											0.018527	0.017297																				-48.8427	-48.7274		-0.000923	-0.000935		0	0
						-183.105	-213.623											0.018538	0.017308																				-48.8607	-48.7454		-0.000922	-0.000934		0	0
						-173.95	-219.727											0.018549	0.017319																				-48.8791	-48.7638		-0.000921	-0.000933		0	0
						-173.95	-198.364											0.018559	0.01733																				-48.898	-48.7827		-0.00092	-0.000931		0	0
						-158.691	-222.778											0.01857	0.017341																				-48.9173	-48.802		-0.000919	-0.00093		0	0
						-256.348	-198.364											0.01858	0.017352																				-48.9369	-48.8217		-0.000917	-0.000929		0	0
						-189.209	-170.898											0.018591	0.017363																				-48.957	-48.8418		-0.000916	-0.000928		0	0
						-210.571	-198.364											0.018602	0.017374																				-48.9775	-48.8623		-0.000915	-0.000927		0	0
						-283.813	-189.209											0.018612	0.017385																				-48.9984	-48.8832		-0.000914	-0.000925		0	0
						-173.95	-192.261											0.018623	0.017395																				-49.0197	-48.9045		-0.000913	-0.000924		0	0
						-192.261	-183.105											0.018633	0.017406																				-49.0413	-48.9262		-0.000911	-0.000923		0	0
						-253.296	-204.468											0.018644	0.017417																				-49.0634	-48.9482		-0.00091	-0.000922		0	0
						-204.468	-155.64											0.018654	0.017428																				-49.0857	-48.9706		-0.000909	-0.00092		0	0
						-170.898	-207.52											0.018665	0.017439																				-49.1085	-48.9934		-0.000907	-0.000919		0	0
						-241.089	-207.52											0.018675	0.017449																				-49.1315	-49.0166		-0.000906	-0.000918		0	0
						-195.312	-177.002											0.018686	0.01746																				-49.155	-49.04		-0.000905	-0.000916		0	0
						-219.727	-192.261											0.018696	0.017471																				-49.1787	-49.0638		-0.000903	-0.000915		0	0
						-265.503	-189.209											0.018707	0.017482																				-49.2028	-49.088		-0.000902	-0.000913		0	0
						-183.105	-152.588											0.018717	0.017492																				-49.2272	-49.1124		-0.000901	-0.000912		0	0
						-192.261	-219.727											0.018728	0.017503																				-49.2519	-49.1372		-0.000899	-0.00091		0	0
						-219.727	-186.157											0.018738	0.017514																				-49.2769	-49.1623		-0.000898	-0.000909		0	0
						-183.105	-155.64											0.018749	0.017525																				-49.3022	-49.1876		-0.000896	-0.000908		0	0
						-186.157	-170.898											0.018759	0.017535																				-49.3278	-49.2133		-0.000895	-0.000906		0	0
						-192.261	-213.623											0.01877	0.017546																				-49.3536	-49.2393		-0.000893	-0.000905		0	0
						-189.209	-134.277											0.01878	0.017557																				-49.3798	-49.2655		-0.000892	-0.000903		0	0
						-167.847	-183.105											0.01879	0.017567																				-49.4062	-49.292		-0.00089	-0.000901		0	0
						-201.416	-198.364											0.018801	0.017578																				-49.4329	-49.3188		-0.000889	-0.0009		0	0
						-204.468	-186.157											0.018811	0.017588																				-49.4599	-49.3458		-0.000887	-0.000898		0	0
						-161.743	-219.727											0.018821	0.017599																				-49.4871	-49.3731		-0.000886	-0.000897		0	0
						-183.105	-192.261											0.018832	0.01761																				-49.5145	-49.4007		-0.000884	-0.000895		0	0
						-149.536	-183.105											0.018842	0.01762																				-49.5422	-49.4285		-0.000882	-0.000894		0	0
						-192.261	-189.209											0.018852	0.017631																				-49.5701	-49.4565		-0.000881	-0.000892		0	0
						-180.054	-225.83											0.018863	0.017641																				-49.5983	-49.4848		-0.000879	-0.00089		0	0
						-183.105	-155.64											0.018873	0.017652																				-49.6267	-49.5133		-0.000878	-0.000889		0	0
						-173.95	-180.054											0.018883	0.017662																				-49.6553	-49.542		-0.000876	-0.000887		0	0
						-231.934	-180.054											0.018893	0.017673																				-49.6841	-49.5709		-0.000874	-0.000885		0	0
						-198.364	-183.105											0.018904	0.017683																				-49.7131	-49.6001		-0.000873	-0.000884		0	0
						-170.898	-180.054											0.018914	0.017694																				-49.7423	-49.6294		-0.000871	-0.000882		0	0
						-241.089	-198.364											0.018924	0.017704																				-49.7718	-49.659		-0.000869	-0.00088		0	0
						-173.95	-186.157											0.018934	0.017715																				-49.8014	-49.6887		-0.000868	-0.000879		0	0
						-180.054	-140.381											0.018945	0.017725																				-49.8312	-49.7186		-0.000866	-0.000877		0	0
						-201.416	-222.778											0.018955	0.017736																				-49.8612	-49.7488		-0.000864	-0.000875		0	0
						-177.002	-213.623											0.018965	0.017746																				-49.8913	-49.7791		-0.000863	-0.000874		0	0
						-207.52	-170.898											0.018975	0.017756																				-49.9216	-49.8095		-0.000861	-0.000872		0	0
						-238.037	-228.882											0.018985	0.017767																				-49.9522	-49.8402		-0.000859	-0.00087		0	0
						-207.52	-183.105											0.018995	0.017777																				-49.9828	-49.871		-0.000858	-0.000868		0	0
						-234.985	-155.64											0.019005	0.017788																				-50.0136	-49.9019		-0.000856	-0.000867		0	0
						-222.778	-173.95											0.019015	0.017798																				-50.0446	-49.933		-0.000854	-0.000865		0	0
						-195.312	-170.898											0.019025	0.017808																				-50.0757	-49.9643		-0.000852	-0.000863		0	0
						-177.002	-170.898											0.019035	0.017819																				-50.107	-49.9957		-0.000851	-0.000861		0	0
						-250.244	-201.416											0.019046	0.017829																				-50.1384	-50.0273		-0.000849	-0.00086		0	0
						-177.002	-152.588											0.019056	0.017839																				-50.17	-50.059		-0.000847	-0.000858		0	0
						-140.381	-173.95											0.019066	0.017849																				-50.2016	-50.0908		-0.000846	-0.000856		0	0
						-238.037	-180.054											0.019076	0.01786																				-50.2335	-50.1228		-0.000844	-0.000854		0	0
						-170.898	-173.95											0.019085	0.01787																				-50.2654	-50.1549		-0.000842	-0.000852		0	0
						-177.002	-201.416											0.019095	0.01788																				-50.2974	-50.1871		-0.00084	-0.000851		0	0
						-274.658	-207.52											0.019105	0.01789																				-50.3296	-50.2194		-0.000839	-0.000849		0	0
						-225.83	-177.002											0.019115	0.0179																				-50.3619	-50.2518		-0.000837	-0.000847		0	0
						-228.882	-228.882											0.019125	0.017911																				-50.3943	-50.2844		-0.000835	-0.000845		0	0
						-213.623	-222.778											0.019135	0.017921																				-50.4268	-50.317		-0.000833	-0.000844		0	0
						-195.312	-259.399											0.019145	0.017931																				-50.4593	-50.3498		-0.000831	-0.000842		0	0
						-140.381	-183.105											0.019155	0.017941																				-50.492	-50.3826		-0.00083	-0.00084		0	0
						-219.727	-241.089											0.019165	0.017951																				-50.5248	-50.4156		-0.000828	-0.000838		0	0
						-167.847	-189.209											0.019175	0.017961																				-50.5577	-50.4486		-0.000826	-0.000836		0	0
						-183.105	-210.571											0.019184	0.017971																				-50.5906	-50.4817		-0.000824	-0.000835		0	0
						-177.002	-207.52											0.019194	0.017981																				-50.6237	-50.5149		-0.000823	-0.000833		0	0
						-170.898	-234.985											0.019204	0.017991																				-50.6568	-50.5482		-0.000821	-0.000831		0	0
						-173.95	-225.83											0.019214	0.018001																				-50.69	-50.5815		-0.000819	-0.000829		0	0
[truncated: 16,752 more rows]
