# Supplementary material for: Dendritic sodium spikes are required for long-term potentiation at distal synapses on hippocampal pyramidal neurons
Source: eLife journal article supplement (doi:10.7554/elife.06414), 2015-08-06
Supplement: supp [file elife_poa_e06414_Figure_1_source_data_1.xlsx]

## Sheet: Figure 1
Panel B	sampling rate 50000Hz							Panel C	sampling rate 50000Hz							Panel D		control	TTX		x	fit	lower bound	upper bound		Panel E		control	TTX		x	fit	lower bound	upper bound		Panel F		control	TTX		x	fit	lower bound	upper bound		Panel G		control	TTX
	Left		Middle		Right				Left		Middle		Right					7.54162	8.49373		2.969	3.19799	2.5838	3.81219				0.262962	0.282836		105.669	108.717	90.2469	127.186				25.7119	21.3814		11.3272	11.4971	5.98764	17.0066				1.81217	1.76369
	control	20 nM TTX	control	21 nM TTX	control	22 nM TTX			control	20 nM TTX	control	20 nM TTX	control	20 nM TTX				3.19786	3.6569		2.99235	3.22132	2.61075	3.83188				0.105669	0.11163		106.605	109.664	91.318	128.009				18.7307	15.195		11.3995	11.5566	6.08421	17.029				1.10725	0.953788
	-0.0747824	-0.0117977	-0.010209	-0.0332869	-0.0135823	-0.0219232			-0.159938	-0.251083	-0.0152096	0.0831195	-0.174257	0.00115508				7.61558	7.45436		3.0157	3.24464	2.6377	3.85158				0.252346	0.244677		107.541	110.611	92.3888	128.832				22.6596	17.7716		11.4718	11.6162	6.18072	17.0516				1.53408	1.27332
	-0.0747824	-0.0117977	-0.010209	-0.0332869	-0.0135823	-0.0219232			-0.159938	-0.251083	-0.0152096	0.0831195	-0.174257	0.00115508				7.4376	7.15355		3.03905	3.26796	2.66464	3.87129				0.261208	0.252623		108.476	111.557	93.4593	129.656				21.1969	24.9991		11.5441	11.6757	6.27715	17.0742				1.34582	1.40626
	-0.0470476	0.0132027	0.0291648	0.0211405	0.0129807	-0.00966369			-0.161891	-0.211352	-0.0258343	0.103433	-0.166446	0.00211579				5.74325	5.98738		3.0624	3.29128	2.69156	3.891				0.219531	0.228045		109.412	112.504	94.5295	130.479				19.2981	17.7465		11.6164	11.7352	6.3735	17.0969				1.416	1.32239
	-0.0470476	0.0132027	0.0291648	0.0211405	0.0129807	-0.00966369			-0.161891	-0.211352	-0.0258343	0.103433	-0.166446	0.00211579				3.9789	3.78283		3.08575	3.31461	2.71848	3.91073				0.172487	0.161542		110.348	113.451	95.5994	131.303				14.8779	15.0813		11.6886	11.7948	6.46978	17.1197				1.42032	1.2017
	-0.0724382	0.0306119	0.00541528	-0.0150574	-0.0263425	-0.0204804			-0.19314	-0.251531	-0.04021	0.0784322	-0.178425	-0.011346				2.969	3.27529		3.1091	3.33793	2.74539	3.93047				0.134515	0.145181		111.284	114.398	96.669	132.127				11.3272	10.9734		11.7609	11.8543	6.56599	17.1426				0.814095	0.765181
	-0.0724382	0.0306119	0.00541528	-0.0150574	-0.0263425	-0.0204804			-0.19314	-0.251531	-0.04021	0.0784322	-0.178425	-0.011346				7.006	7.48067		3.13245	3.36125	2.77229	3.95021				0.291877	0.306033		112.219	115.345	97.7383	132.952				23.8114	24.0049		11.8332	11.9138	6.66211	17.1655				1.92799	2.2119
	-0.0622816	0.00650518	-0.00395933	0.0016093	-0.0159252	-0.00653828			-0.180641	-0.247959	-0.0161469	0.0914524	-0.153946	0.00908672				6.38156	6.61815		3.1558	3.38457	2.79917	3.96997				0.1946	0.20135		113.155	116.292	98.8073	133.777							11.9055	11.9734	6.75815	17.1886
	-0.0622816	0.00650518	-0.00395933	0.0016093	-0.0159252	-0.00653828			-0.180641	-0.247959	-0.0161469	0.0914524	-0.153946	0.00908672							3.17915	3.40789	2.82605	3.98974							114.091	117.239	99.876	134.602							11.9778	12.0329	6.8541	17.2117
	-0.0232191	0.0346293	0.027291	0.0341614	0.0273042	-0.000288046			-0.201736	-0.209119	-0.0161473	0.0990049	-0.169312	0.00548094			mean	5.76349	5.98921		3.2025	3.43122	2.85292	4.00951			mean	0.210577	0.21488		115.026	118.186	100.944	135.427			mean	19.7017	18.3941		12.0501	12.0924	6.94998	17.2349			mean	1.42222	1.36228
	-0.0232191	0.0346293	0.027291	0.0341614	0.0273042	-0.000288046			-0.201736	-0.209119	-0.0161473	0.0990049	-0.169312	0.00548094			SEM	0.633523	0.64623		3.22585	3.45454	2.87978	4.0293			SEM	0.0211606	0.0217176		115.962	119.133	102.012	136.253			SEM	1.68239	1.69618		12.1224	12.1519	7.04576	17.2581			SEM	0.12644	0.160557
	-0.0595465	0.0323983	0.0247909	-0.00854765	-0.0172279	-0.0197597			-0.20525	-0.239475	-0.0220841	0.079995	-0.182592	0.0117303							3.2492	3.47786	2.90662	4.0491							116.898	120.08	103.08	137.079							12.1946	12.2115	7.14146	17.2815
	-0.0595465	0.0323983	0.0247909	-0.00854765	-0.0172279	-0.0197597			-0.20525	-0.239475	-0.0220841	0.079995	-0.182592	0.0117303							3.27255	3.50118	2.93346	4.06891							117.834	121.027	104.147	137.906							12.2669	12.271	7.23707	17.305
	-0.0423603	-0.0064419	0.0191654	0.0190571	-0.0138411	0.0112505			-0.159155	-0.214923	-0.0108338	0.138589	-0.156549	0.00572127							3.2959	3.52451	2.96028	4.08873							118.769	121.973	105.214	138.733							12.3392	12.3305	7.33258	17.3285
	-0.0423603	-0.0064419	0.0191654	0.0190571	-0.0138411	0.0112505			-0.159155	-0.214923	-0.0108338	0.138589	-0.156549	0.00572127							3.31924	3.54783	2.98709	4.10856							119.705	122.92	106.281	139.56							12.4115	12.3901	7.428	17.3522
	-0.0255623	0.0395405	0.0116653	0.0214012	0.00699095	-0.00702011			-0.214234	-0.210014	-0.0380211	0.0875465	-0.182852	0.00476055							3.34259	3.57115	3.01389	4.12841							120.641	123.867	107.347	140.387							12.4838	12.4496	7.52332	17.3759
	-0.0255623	0.0395405	0.0116653	0.0214012	0.00699095	-0.00702011			-0.214234	-0.210014	-0.0380211	0.0875465	-0.182852	0.00476055							3.36594	3.59447	3.04068	4.14826							121.576	124.814	108.413	141.215							12.5561	12.5091	7.61855	17.3997
	-0.0779057	0.0252539	-0.0045838	-0.0233906	-0.00967419	-0.0245671			-0.222048	-0.235013	-0.0402085	0.0950983	-0.155249	0.00427903							3.38929	3.6178	3.06746	4.16813							122.512	125.761	109.478	142.044							12.6283	12.5687	7.71367	17.4237
	-0.0779057	0.0252539	-0.0045838	-0.0233906	-0.00967419	-0.0245671			-0.222048	-0.235013	-0.0402085	0.0950983	-0.155249	0.00427903							3.41264	3.64112	3.09422	4.18801							123.448	126.708	110.543	142.873							12.7006	12.6282	7.80869	17.4477
	-0.022047	0.0350751	0.0307285	0.0208799	0.0137627	-0.00798112			-0.190796	-0.21001	-0.00208441	0.12114	-0.148215	0.0105284							3.43599	3.66444	3.12098	4.2079							124.384	127.655	111.608	143.702							12.7729	12.6877	7.90361	17.4719
	-0.022047	0.0350751	0.0307285	0.0208799	0.0137627	-0.00798112			-0.190796	-0.21001	-0.00208441	0.12114	-0.148215	0.0105284							3.45934	3.68776	3.14771	4.22781							125.319	128.602	112.672	144.531							12.8452	12.7473	7.99842	17.4961
	-0.0798588	0.0382031	-0.00802122	0.0146295	-0.00654995	-0.00389352			-0.209937	-0.225191	-0.0267712	0.0794746	-0.166706	-0.020721							3.48269	3.71108	3.17444	4.24773							126.255	129.549	113.736	145.361							12.9175	12.8068	8.09311	17.5205
	-0.0798588	0.0382031	-0.00802122	0.0146295	-0.00654995	-0.00389352			-0.209937	-0.225191	-0.0267712	0.0794746	-0.166706	-0.020721							3.50604	3.73441	3.20115	4.26766							127.191	130.496	114.799	146.192							12.9898	12.8663	8.1877	17.545
	-0.069314	0.0140943	0.0113536	-0.00229822	0.00985515	-0.00461538			-0.159547	-0.228315	-0.00270926	0.100046	-0.183633	0.0220675							3.52939	3.75773	3.22785	4.28761							128.126	131.443	115.862	147.023							13.0621	12.9259	8.28217	17.5696
	-0.069314	0.0140943	0.0113536	-0.00229822	0.00985515	-0.00461538			-0.159547	-0.228315	-0.00270926	0.100046	-0.183633	0.0220675							3.55274	3.78105	3.25454	4.30757							129.062	132.389	116.925	147.854							13.1343	12.9854	8.37652	17.5943
	-0.0407972	0.0542728	0.0247909	0.0325989	0.0226172	-0.00942249			-0.178687	-0.205995	-0.0048966	0.115671	-0.148216	0.0155773							3.57609	3.80437	3.28121	4.32754							129.998	133.336	117.987	148.686							13.2066	13.0449	8.47075	17.6191
	-0.0407972	0.0542728	0.0247909	0.0325989	0.0226172	-0.00942249			-0.178687	-0.205995	-0.0048966	0.115671	-0.148216	0.0155773							3.59944	3.8277	3.30787	4.34753							130.934	134.283	119.048	149.518							13.2789	13.1045	8.56486	17.6441
	-0.0779066	0.0493628	0.00635408	-0.00463981	-0.0245178	-0.0240868			-0.203298	-0.217155	-0.0323964	0.0872855	-0.175821	-0.00846265							3.62279	3.85102	3.33451	4.36753							131.869	135.23	120.11	150.351							13.3512	13.164	8.65884	17.6691
	-0.0779066	0.0493628	0.00635408	-0.00463981	-0.0245178	-0.0240868			-0.203298	-0.217155	-0.0323964	0.0872855	-0.175821	-0.00846265							3.64614	3.87434	3.36114	4.38755							132.805	136.177	121.17	151.184							13.4235	13.2235	8.7527	17.6944
	-0.0529051	-0.00599395	0.00666536	-0.00724461	-0.0107169	-0.00629678			-0.166969	-0.210905	-0.0170838	0.128171	-0.15004	0.0162977							3.66949	3.89766	3.38775	4.40758							133.741	137.124	122.23	152.018							13.4958	13.2831	8.84642	17.7197
	-0.0529051	-0.00599395	0.00666536	-0.00724461	-0.0107169	-0.00629678			-0.166969	-0.210905	-0.0170838	0.128171	-0.15004	0.0162977							3.69284	3.92099	3.41435	4.42763							134.676	138.071	123.29	152.852							13.568	13.3426	8.94001	17.7452
	-0.0599375	0.0239144	0.00385355	0.0154118	0.00464682	-0.00942337			-0.208766	-0.208672	-0.0252087	0.104734	-0.184415	0.0071641							3.71619	3.94431	3.44093	4.44769							135.612	139.018	124.349	153.687							13.6403	13.4021	9.03345	17.7708
	-0.0599375	0.0239144	0.00385355	0.0154118	0.00464682	-0.00942337			-0.208766	-0.208672	-0.0252087	0.104734	-0.184415	0.0071641							3.73954	3.96763	3.46749	4.46777							136.548	139.965	125.407	154.522							13.7126	13.4617	9.12676	17.7965
	-0.0779056	0.0408811	-0.00208441	-0.0179216	-0.010715	-0.029616			-0.221656	-0.248851	-0.0302083	0.0940566	-0.165925	0.00187517							3.76289	3.99095	3.49404	4.48786							137.484	140.912	126.465	155.358							13.7849	13.5212	9.21992	17.8225
	-0.0779056	0.0408811	-0.00208441	-0.0179216	-0.010715	-0.029616			-0.221656	-0.248851	-0.0302083	0.0940566	-0.165925	0.00187517							3.78624	4.01427	3.52057	4.50798							138.419	141.859	127.522	156.195							13.8572	13.5807	9.31294	17.8485
	-0.0212669	0.014988	0.0285404	0.0219216	0.00256463	-0.00629825			-0.165407	-0.221172	-0.0242707	0.146661	-0.1503	0.0107693							3.80959	4.0376	3.54709	4.52811							139.355	142.805	128.579	157.032							13.9295	13.6403	9.4058	17.8747
	-0.0212669	0.014988	0.0285404	0.0219216	0.00256463	-0.00629825			-0.165407	-0.221172	-0.0242707	0.146661	-0.1503	0.0107693							3.83294	4.06092	3.57358	4.54825							140.291	143.752	129.635	157.869							14.0018	13.6998	9.49851	17.9011
	-0.0564213	0.0332909	0.0269786	0.00759901	-0.00446649	-0.00798141			-0.212672	-0.201976	-0.0208333	0.106557	-0.176602	-0.0281735							3.85629	4.08424	3.60006	4.56842							141.226	144.699	130.691	158.708							14.074	13.7593	9.59106	17.9276
	-0.0564213	0.0332909	0.0269786	0.00759901	-0.00446649	-0.00798141			-0.212672	-0.201976	-0.0208333	0.106557	-0.176602	-0.0281735							3.87964	4.10756	3.62653	4.5886							142.162	145.646	131.746	159.547							14.1463	13.8188	9.68344	17.9543
	-0.0767355	0.0185585	0.00635332	-0.0259948	0.0101165	-0.00966222			-0.150172	-0.222067	-0.0252087	0.122443	-0.160716	0.00740355							3.90299	4.13089	3.65297	4.6088							143.098	146.593	132.8	160.386							14.2186	13.8784	9.77566	17.9811
	-0.0767355	0.0185585	0.00635332	-0.0259948	0.0101165	-0.00966222			-0.150172	-0.222067	-0.0252087	0.122443	-0.160716	0.00740355							3.92634	4.15421	3.67939	4.62902							144.034	147.54	133.854	161.226							14.2909	13.9379	9.86771	18.0081
	-0.000955573	0.0502554	0.0341651	0.0325993	0.0166269	0.0158176			-0.141579	-0.184566	-0.0064591	0.13286	-0.145872	0.0237501							3.94969	4.17753	3.7058	4.64926							144.969	148.487	134.907	162.067							14.3632	13.9974	9.95958	18.0353
	-0.000955573	0.0502554	0.0341651	0.0325993	0.0166269	0.0158176			-0.141579	-0.184566	-0.0064591	0.13286	-0.145872	0.0237501							3.97304	4.20085	3.73218	4.66952							145.905	149.434	135.959	162.909							14.4355	14.057	10.0513	18.0627
	-0.053297	0.064542	0.00135263	-0.0239107	-0.0174873	-0.00341375			-0.190407	-0.222065	-0.0405217	0.102651	-0.171394	-0.0185584							3.99639	4.22418	3.75855	4.6898							146.841	150.381	137.01	163.751							14.5077	14.1165	10.1428	18.0902
	-0.053297	0.064542	0.00135263	-0.0239107	-0.0174873	-0.00341375			-0.190407	-0.222065	-0.0405217	0.102651	-0.171394	-0.0185584							4.01973	4.2475	3.7849	4.7101							147.776	151.328	138.061	164.594							14.58	14.176	10.2341	18.118
	-0.0290785	0.0243634	-0.00239645	-0.00490112	0.0155855	0.0165383			-0.156814	-0.206888	-0.00520903	0.132599	-0.151863	0.0239901							4.04308	4.27082	3.81122	4.73042							148.712	152.275	139.111	165.438							14.6523	14.2356	10.3252	18.1459
	-0.0290785	0.0243634	-0.00239645	-0.00490112	0.0155855	0.0165383			-0.156814	-0.206888	-0.00520903	0.132599	-0.151863	0.0239901							4.06643	4.29414	3.83752	4.75076							149.648	153.221	140.161	166.282							14.7246	14.2951	10.4162	18.174
	-0.0107183	0.0386489	0.0119789	0.0331193	0.0215745	0.00427844			-0.207203	-0.201529	-0.0267708	0.117233	-0.163061	0.000431758							4.08978	4.31746	3.86381	4.77112							150.584	154.168	141.209	167.127							14.7969	14.3546	10.5069	18.2024
	-0.0107183	0.0386489	0.0119789	0.0331193	0.0215745	0.00427844			-0.207203	-0.201529	-0.0267708	0.117233	-0.163061	0.000431758							4.11313	4.34079	3.89007	4.79151							151.519	155.115	142.257	167.973							14.8692	14.4142	10.5974	18.2309
	-0.0556412	0.0471306	-0.00552183	-0.0220886	-0.0135817	-0.0291351			-0.207595	-0.215816	-0.0355218	0.105255	-0.159674	0.00427843							4.13648	4.36411	3.9163	4.81191							152.455	156.062	143.304	168.82							14.9415	14.4737	10.6877	18.2597
	-0.0556412	0.0471306	-0.00552183	-0.0220886	-0.0135817	-0.0291351			-0.207595	-0.215816	-0.0355218	0.105255	-0.159674	0.00427843							4.15983	4.38743	3.94252	4.83234							153.391	157.009	144.35	169.668							15.0137	14.5332	10.7778	18.2886
	0.00568677	0.0145411	0.0288535	0.00629692	0.00334601	-0.000529842			-0.153687	-0.201083	0.00229105	0.129473	-0.14431	0.0126919							4.18318	4.41075	3.96871	4.8528							154.326	157.956	145.396	170.516							15.086	14.5928	10.8677	18.3178
	0.00568677	0.0145411	0.0288535	0.00629692	0.00334601	-0.000529842			-0.153687	-0.201083	0.00229105	0.129473	-0.14431	0.0126919							4.20653	4.43408	3.99488	4.87327							155.262	158.903	146.44	171.366							15.1583	14.6523	10.9573	18.3472
	-0.0157976	0.0422195	0.0157287	0.0232237	0.0168869	-0.0219224			-0.185328	-0.186351	-0.0361462	0.0995262	-0.174779	-0.0159128							4.22988	4.4574	4.02102	4.89377							156.198	159.85	147.484	172.216							15.2306	14.7118	11.0468	18.3769
	-0.0157976	0.0422195	0.0157287	0.0232237	0.0168869	-0.0219224			-0.185328	-0.186351	-0.0361462	0.0995262	-0.174779	-0.0159128							4.25323	4.48072	4.04714	4.9143							157.134	160.797	148.526	173.067							15.3029	14.7714	11.1359	18.4068
	-0.051734	0.0243623	-0.0117715	-0.0140163	0.00464746	-0.0207213			-0.176733	-0.207782	-0.0242711	0.110463	-0.168008	0.00524032							4.27658	4.50404	4.07324	4.93485							158.069	161.744	149.568	173.919							15.3752	14.8309	11.2249	18.4369
	-0.051734	0.0243623	-0.0117715	-0.0140163	0.00464746	-0.0207213			-0.176733	-0.207782	-0.0242711	0.110463	-0.168008	0.00524032							4.29993	4.52737	4.0993	4.95543							159.005	162.691	150.609	174.772							15.4474	14.8904	11.3135	18.4673
	-0.0126724	0.0292735	0.0226032	0.0125473	0.01246	-0.00798024			-0.16853	-0.186351	-0.0108346	0.142494	-0.146393	0.0047585							4.32328	4.55069	4.12535	4.97603							159.941	163.637	151.649	175.626							15.5197	14.95	11.4019	18.498
	-0.0126724	0.0292735	0.0226032	0.0125473	0.01246	-0.00798024			-0.16853	-0.186351	-0.0108346	0.142494	-0.146393	0.0047585							4.34663	4.57401	4.15136	4.99666							160.876	164.584	152.688	176.481							15.592	15.0095	11.4901	18.5289
	-0.0493908	0.0542728	0.0126029	-0.00646356	0.000743113	-0.0183181			-0.198219	-0.197958	-0.0286465	0.0995262	-0.162019	0.0028356							4.36998	4.59733	4.17735	5.01732							161.812	165.531	153.725	177.337							15.6643	15.069	11.578	18.5601
	-0.0493908	0.0542728	0.0126029	-0.00646356	0.000743113	-0.0183181			-0.198219	-0.197958	-0.0286465	0.0995262	-0.162019	0.0028356							4.39333	4.62065	4.20331	5.038							162.748	166.478	154.762	178.194							15.7366	15.1286	11.6656	18.5915
	-0.022048	0.0279351	-0.00145842	-0.000995187	0.0176689	-0.0135092			-0.164234	-0.201978	-0.027084	0.132338	-0.148738	0.0196631							4.41668	4.64398	4.22924	5.05871							163.684	167.425	155.798	179.052							15.8089	15.1881	11.7529	18.6233
	-0.022048	0.0279351	-0.00145842	-0.000995187	0.0176689	-0.0135092			-0.164234	-0.201978	-0.027084	0.132338	-0.148738	0.0196631							4.44003	4.6673	4.25515	5.07945							164.619	168.372	156.833	179.911							15.8812	15.2476	11.8399	18.6553
	0.00724984	0.0560603	0.026353	0.028693	0.0270429	0.0182206			-0.182594	-0.199298	-0.0214589	0.11411	-0.152123	0.0211054							4.46338	4.69062	4.28102	5.10022							165.555	169.319	157.866	180.772							15.9534	15.3072	11.9267	18.6876
	0.00724984	0.0560603	0.026353	0.028693	0.0270429	0.0182206			-0.182594	-0.199298	-0.0214589	0.11411	-0.152123	0.0211054							4.48673	4.71394	4.30686	5.12102							166.491	170.266	158.898	181.633							16.0257	15.3667	12.0131	18.7203
	-0.0501718	0.0399884	-0.0064591	-0.0140154	-0.00264434	-0.0228843			-0.190798	-0.231887	-0.0189591	0.0969224	-0.163581	-0.00870151							4.51008	4.73727	4.33268	5.14185							167.426	171.213	159.93	182.496							16.098	15.4262	12.0992	18.7532
	-0.0501718	0.0399884	-0.0064591	-0.0140154	-0.00264434	-0.0228843			-0.190798	-0.231887	-0.0189591	0.0969224	-0.163581	-0.00870151							4.53343	4.76059	4.35846	5.16272							168.362	172.16	160.96	183.36							16.1703	15.4857	12.185	18.7865
	-0.0118923	0.0310598	0.0194782	0.0099425	0.0218346	-0.0147111			-0.161892	-0.209119	0.0213527	0.132859	-0.142227	0.0129331							4.55678	4.78391	4.38421	5.18361							169.298	173.107	161.988	184.225							16.2426	15.5453	12.2705	18.8201
	-0.0118923	0.0310598	0.0194782	0.0099425	0.0218346	-0.0147111			-0.161892	-0.209119	0.0213527	0.132859	-0.142227	0.0129331							4.58013	4.80723	4.40993	5.20453							170.234	174.053	163.016	185.091							16.3149	15.6048	12.3556	18.854
	-0.0197029	0.0685583	0.00885309	0.0279116	0.0218358	-0.00485659			-0.204859	-0.219833	-0.0158341	0.115932	-0.183633	-0.0216835							4.60348	4.83056	4.43562	5.22549							171.169	175	164.042	185.959							16.3871	15.6643	12.4404	18.8883
	-0.0197029	0.0685583	0.00885309	0.0279116	0.0218358	-0.00485659			-0.204859	-0.219833	-0.0158341	0.115932	-0.183633	-0.0216835							4.62683	4.85388	4.46127	5.24648							172.105	175.947	165.067	186.828							16.4594	15.7239	12.5248	18.9229
	-0.0591574	0.0489159	-0.0117715	-0.0223483	0.00673092	-0.0171156			-0.177516	-0.231441	-0.0164593	0.107859	-0.165405	0.000913583							4.65018	4.8772	4.48689	5.26751							173.041	176.894	166.091	187.698							16.5317	15.7834	12.6089	18.9579
	-0.0591574	0.0489159	-0.0117715	-0.0223483	0.00673092	-0.0171156			-0.177516	-0.231441	-0.0164593	0.107859	-0.165405	0.000913583							4.67353	4.90052	4.51248	5.28857							173.976	177.841	167.113	188.569							16.604	15.8429	12.6926	18.9933
	0.0138903	0.0288255	-0.00427214	0.0336404	0.0291276	0.00307798			-0.159547	-0.2051	-0.00270926	0.146141	-0.130249	0.0199043							4.69688	4.92384	4.53803	5.30966							174.912	178.788	168.134	189.442							16.6763	15.9025	12.7759	19.029
	0.0138903	0.0288255	-0.00427214	0.0336404	0.0291276	0.00307798			-0.159547	-0.2051	-0.00270926	0.146141	-0.130249	0.0199043							4.72022	4.94717	4.56354	5.33079							175.848	179.735	169.153	190.317							16.7486	15.962	12.8589	19.0651
	-0.0380621	0.0529344	0.00322794	-0.0072443	0.0299084	-0.0272116			-0.183765	-0.21537	-0.0336461	0.104473	-0.170612	-0.00846206							4.74357	4.97049	4.58902	5.35196							176.784	180.682	170.171	191.192							16.8209	16.0215	12.9414	19.1017
	-0.0380621	0.0529344	0.00322794	-0.0072443	0.0299084	-0.0272116			-0.183765	-0.21537	-0.0336461	0.104473	-0.170612	-0.00846206							4.76692	4.99381	4.61446	5.37317							177.719	181.629	171.188	192.07							16.8931	16.0811	13.0236	19.1386
	-0.0603275	0.0279351	-0.0173974	0.0112455	0.00673219	-0.0103855			-0.16072	-0.245281	-0.0261468	0.130775	-0.173997	0.0242311							4.79027	5.01713	4.63986	5.39441							178.655	182.576	172.203	192.949							16.9654	16.1406	13.1053	19.1759
	-0.0603275	0.0279351	-0.0173974	0.0112455	0.00673219	-0.0103855			-0.16072	-0.245281	-0.0261468	0.130775	-0.173997	0.0242311							4.81362	5.04046	4.66523	5.41569							179.591	183.523	173.216	193.829							17.0377	16.2001	13.1866	19.2137
	-0.00954723	0.0203449	0.014479	0.0411928	0.0450127	-0.00918363			-0.158765	-0.229207	-0.023959	0.128692	-0.156811	0.000432638							4.83697	5.06378	4.69055	5.437							180.527	184.47	174.228	194.711							17.11	16.2597	13.2675	19.2518
	-0.00954723	0.0203449	0.014479	0.0411928	0.0450127	-0.00918363			-0.158765	-0.229207	-0.023959	0.128692	-0.156811	0.000432638							4.86032	5.0871	4.71584	5.45836							181.462	185.416	175.238	195.594							17.1823	16.3192	13.3479	19.2905
	-0.0579853	0.0453453	-0.000833571	-0.00151557	0.00412739	-0.0356248			-0.198219	-0.247959	-0.0280209	0.0914524	-0.171134	-0.00365378							4.88367	5.11042	4.74109	5.47976							182.398	186.363	176.247	196.479							17.2546	16.3787	13.4279	19.3295
	-0.0579853	0.0453453	-0.000833571	-0.00151557	0.00412739	-0.0356248			-0.198219	-0.247959	-0.0280209	0.0914524	-0.171134	-0.00365378							4.90702	5.13375	4.76629	5.5012							183.334	187.31	177.254	197.366							17.3269	16.4383	13.5074	19.3691
	-0.0181417	0.00605941	0.0185409	0.000567567	0.0257415	-0.00605704			-0.143532	-0.251085	-0.0164593	0.123744	-0.173216	0.00451964							4.93037	5.15707	4.79146	5.52268							184.269	188.257	178.26	198.255							17.3991	16.4978	13.5865	19.4091
	-0.0181417	0.00605941	0.0185409	0.000567567	0.0257415	-0.00605704			-0.143532	-0.251085	-0.0164593	0.123744	-0.173216	0.00451964							4.95372	5.18039	4.81658	5.5442							185.205	189.204	179.263	199.145							17.4714	16.5573	13.6651	19.4496
	-0.0075941	0.0422195	0.00791582	0.0315572	0.0377202	-0.00822144			-0.19197	-0.220727	-0.0373971	0.126348	-0.192487	0.00644283							4.97707	5.20371	4.84166	5.56577							186.141	190.151	180.265	200.037							17.5437	16.6169	13.7432	19.4905
	-0.0075941	0.0422195	0.00791582	0.0315572	0.0377202	-0.00822144			-0.19197	-0.220727	-0.0373971	0.126348	-0.192487	0.00644283							5.00042	5.22703	4.8667	5.58737							187.077	191.098	181.265	200.931							17.616	16.6764	13.8208	19.532
	-0.052516	0.0390947	-0.00646025	-0.0194838	0.0103778	-0.0356253			-0.182594	-0.253763	-0.022709	0.121921	-0.182853	0.01149							5.02377	5.25036	4.89169	5.60903							188.012	192.045	182.263	201.826							17.6883	16.7359	13.8979	19.574
	-0.052516	0.0390947	-0.00646025	-0.0194838	0.0103778	-0.0356253			-0.182594	-0.253763	-0.022709	0.121921	-0.182853	0.01149							5.04712	5.27368	4.91664	5.63072							188.948	192.992	183.26	202.723							17.7606	16.7955	13.9745	19.6164
	0.00451565	0.0163264	0.0038524	0.0125473	0.0369401	0.00644226			-0.147048	-0.204656	0.00166543	0.127652	-0.148737	0.0160582							5.07047	5.297	4.94154	5.65246							189.884	193.939	184.255	203.623							17.8328	16.855	14.0505	19.6595
	0.00451565	0.0163264	0.0038524	0.0125473	0.0369401	0.00644226			-0.147048	-0.204656	0.00166543	0.127652	-0.148737	0.0160582							5.09382	5.32032	4.9664	5.67425							190.819	194.886	185.247	204.524							17.9051	16.9145	14.126	19.703
	-0.022048	0.038202	0.00541605	0.012025	0.0218346	0.00331685			-0.169312	-0.203763	-0.0277085	0.0875471	-0.169572	-0.00581701							5.11717	5.34365	4.99121	5.69608							191.755	195.832	186.238	205.427							17.9774	16.9741	14.201	19.7471
	-0.022048	0.038202	0.00541605	0.012025	0.0218346	0.00331685			-0.169312	-0.203763	-0.0277085	0.0875471	-0.169572	-0.00581701							5.14052	5.36697	5.01597	5.71796							192.691	196.779	187.227	206.332							18.0497	17.0336	14.2754	19.7917
	-0.0396252	0.00918419	-0.0108349	-0.0153184	0.0135026	-0.0209611			-0.121656	-0.229208	-0.0239586	0.12062	-0.144571	0.013895							5.16387	5.39029	5.04069	5.73989							193.627	197.726	188.214	207.239							18.122	17.0931	14.3493	19.8369
	-0.0396252	0.00918419	-0.0108349	-0.0153184	0.0135026	-0.0209611			-0.121656	-0.229208	-0.0239586	0.12062	-0.144571	0.013895							5.18722	5.41361	5.06536	5.76187							194.562	198.673	189.199	208.148							18.1943	17.1526	14.4226	19.8827
	-0.00134468	0.0136474	0.0313537	0.0372859	0.040325	-0.00413473			-0.106812	-0.196173	-0.0186474	0.143015	-0.148738	0.0242299							5.21057	5.43694	5.08998	5.78389							195.498	199.62	190.182	209.059							18.2666	17.2122	14.4953	19.9291
	-0.00134468	0.0136474	0.0313537	0.0372859	0.040325	-0.00413473			-0.106812	-0.196173	-0.0186474	0.143015	-0.148738	0.0242299							5.23392	5.46026	5.11455	5.80596							196.434	200.567	191.162	209.972							18.3388	17.2717	14.5674	19.976
	-0.0341577	0.0239155	0.00354112	0.00681731	0.00334601	-0.0351435			-0.159938	-0.198404	-0.0277085	0.112287	-0.16254	0.0021158							5.25727	5.48358	5.13907	5.82809							197.369	201.514	192.141	210.887							18.4111	17.3312	14.6389	20.0235
	-0.0341577	0.0239155	0.00354112	0.00681731	0.00334601	-0.0351435			-0.159938	-0.198404	-0.0277085	0.112287	-0.16254	0.0021158							5.28062	5.5069	5.16355	5.85026							198.305	202.461	193.118	211.804							18.4834	17.3908	14.7099	20.0717
	-0.0396252	-0.00153075	0.0201026	0.00525551	0.0176689	-0.00749958			-0.111891	-0.234566	-0.0198964	0.125567	-0.149258	0.0122112							5.30397	5.53023	5.18797	5.87248							199.241	203.408	194.093	212.723							18.5557	17.4503	14.7802	20.1204
	-0.0396252	-0.00153075	0.0201026	0.00525551	0.0176689	-0.00749958			-0.111891	-0.234566	-0.0198964	0.125567	-0.149258	0.0122112							5.32732	5.55355	5.21234	5.89476							200.177	204.355	195.065	213.644							18.628	17.5098	14.8499	20.1698
	0.0154543	0.0167722	0.0257285	0.0237447	0.0356381	-0.00581789			-0.129469	-0.192602	-0.0327092	0.122182	-0.162019	-0.000288936							5.35067	5.57687	5.23665	5.91708							201.112	205.302	196.035	214.568							18.7003	17.5694	14.9189	20.2198
	0.0154543	0.0167722	0.0257285	0.0237447	0.0356381	-0.00581789			-0.129469	-0.192602	-0.0327092	0.122182	-0.162019	-0.000288936							5.37402	5.60019	5.26092	5.93946							202.048	206.248	197.003	215.493							18.7725	17.6289	14.9874	20.2704
	-0.0263433	0.0382031	0.0129161	-0.012192	-0.00837211	-0.0149529			-0.150172	-0.224744	-0.0486462	0.110204	-0.173477	0.00187518							5.39737	5.62351	5.28513	5.96189							202.984	207.195	197.97	216.421							18.8448	17.6884	15.0552	20.3217
	-0.0263433	0.0382031	0.0129161	-0.012192	-0.00837211	-0.0149529			-0.150172	-0.224744	-0.0486462	0.110204	-0.173477	0.00187518							5.42071	5.64684	5.3093	5.98438							203.919	208.142	198.933	217.351							18.9171	17.748	15.1223	20.3736
	0.0326414	0.0114174	0.00104059	0.0253072	0.00542883	0.00548154			-0.115017	-0.216709	-0.0167725	0.146922	-0.148738	0.0122118							5.44406	5.67016	5.3334	6.00692							204.855	209.089	199.895	218.283							18.9894	17.8075	15.1888	20.4262
	0.0326414	0.0114174	0.00104059	0.0253072	0.00542883	0.00548154			-0.115017	-0.216709	-0.0167725	0.146922	-0.148738	0.0122118							5.46741	5.69348	5.35746	6.02951							205.791	210.036	200.854	219.218							19.0617	17.867	15.2546	20.4794
	0.00256349	0.0288255	0.00197824	0.00421283	0.00621085	-0.00437476			-0.159548	-0.230548	-0.0242715	0.113589	-0.165403	-0.0190387							5.49076	5.7168	5.38146	6.05215							206.727	210.983	201.812	220.154							19.134	17.9266	15.3198	20.5333
	0.00256349	0.0288255	0.00197824	0.00421283	0.00621085	-0.00437476			-0.159548	-0.230548	-0.0242715	0.113589	-0.165403	-0.0190387							5.51411	5.74013	5.4054	6.07485							207.662	211.93	202.767	221.093							19.2063	17.9861	15.3843	20.5879
	-0.0333757	0.0185585	0.00729021	-0.0202645	-0.0109763	-0.019039			-0.136499	-0.230995	-0.0233346	0.134682	-0.167488	0.0131725							5.53746	5.76345	5.42929	6.09761							208.598	212.877	203.719	222.034							19.2785	18.0456	15.4482	20.6431
	-0.0333757	0.0185585	0.00729021	-0.0202645	-0.0109763	-0.019039			-0.136499	-0.230995	-0.0233346	0.134682	-0.167488	0.0131725							5.56081	5.78677	5.45313	6.12041							209.534	213.824	204.67	222.978							19.3508	18.1052	15.5113	20.699
	0.00568772	0.0132038	0.0138534	0.0250462	0.00360732	0.00572098			-0.099	-0.21046	-0.00989691	0.138329	-0.131029	0.0112508							5.58416	5.81009	5.47691	6.14328							210.469	214.771	205.618	223.923							19.4231	18.1647	15.5738	20.7556
	0.00568772	0.0132038	0.0138534	0.0250462	0.00360732	0.00572098			-0.099	-0.21046	-0.00989691	0.138329	-0.131029	0.0112508							5.60751	5.83342	5.50063	6.1662							211.405	215.718	206.564	224.871							19.4954	18.2242	15.6357	20.8128
	-0.00525188	0.0239155	0.0147918	0.0065576	-0.00915348	-0.014472			-0.147829	-0.234566	-0.0386468	0.0945773	-0.155769	0.00451935							5.63086	5.85674	5.5243	6.18917							212.341	216.664	207.508	225.821							19.5677	18.2838	15.6968	20.8707
	-0.00525188	0.0239155	0.0147918	0.0065576	-0.00915348	-0.014472			-0.147829	-0.234566	-0.0386468	0.0945773	-0.155769	0.00451935							5.65421	5.88006	5.54791	6.21221							213.277	217.611	208.45	226.773							19.64	18.3433	15.7572	20.9293
	-0.0185308	0.00338258	0.0185409	-0.000994869	-0.00524851	-0.000288044			-0.109938	-0.247513	-0.0164601	0.122703	-0.147695	0.0242308							5.67756	5.90338	5.57147	6.23529							214.212	218.558	209.389	227.728							19.7122	18.4028	15.817	20.9886
	-0.0185308	0.00338258	0.0185409	-0.000994869	-0.00524851	-0.000288044			-0.109938	-0.247513	-0.0164601	0.122703	-0.147695	0.0242308							5.70091	5.9267	5.59497	6.25844							215.148	219.505	210.326	228.684							19.7845	18.4624	15.8761	21.0486
	0.0131092	0.0337378	0.0376029	0.0315572	0.0335533	-0.00485512			-0.132595	-0.229208	-0.0292714	0.119057	-0.157071	0.0182223							5.72426	5.95003	5.61842	6.28164							216.084	220.452	211.261	229.643							19.8568	18.5219	15.9345	21.1093
	0.0131092	0.0337378	0.0376029	0.0315572	0.0335533	-0.00485512			-0.132595	-0.229208	-0.0292714	0.119057	-0.157071	0.0182223							5.74761	5.97335	5.64181	6.30489							217.019	221.399	212.194	230.604							19.9291	18.5814	15.9922	21.1706
	-0.0450926	0.038201	0.0204154	-0.00438009	-0.0161859	-0.0127891			-0.144703	-0.248404	-0.0348961	0.104995	-0.170873	0.00163544							5.77096	5.99667	5.66514	6.3282							217.955	222.346	213.124	231.568							20.0014	18.641	16.0493	21.2326
	-0.0450926	0.038201	0.0204154	-0.00438009	-0.0161859	-0.0127891			-0.144703	-0.248404	-0.0348961	0.104995	-0.170873	0.00163544							5.79431	6.01999	5.68841	6.35157							218.891	223.293	214.052	232.533							20.0737	18.7005	16.1057	21.2953
	-0.0126705	-0.000191248	0.0194785	0.00838134	-0.0114963	0.0261548			-0.0954857	-0.213136	-0.011147	0.131818	-0.158372	0.00836691							5.81766	6.04332	5.71163	6.375							219.827	224.24	214.979	233.501							20.146	18.76	16.1614	21.3587
	-0.0126705	-0.000191248	0.0194785	0.00838134	-0.0114963	0.0261548			-0.0954857	-0.213136	-0.011147	0.131818	-0.158372	0.00836691							5.84101	6.06664	5.7348	6.39848							220.762	225.187	215.903	234.471							20.2182	18.8195	16.2164	21.4227
	0.0084219	0.0239166	0.0101035	0.0253071	-0.00576857	0.0112494			-0.140408	-0.202868	-0.0295838	0.129995	-0.173217	-0.00846206							5.86436	6.08996	5.75791	6.42202							221.698	226.134	216.824	235.443							20.2905	18.8791	16.2708	21.4874
	0.0084219	0.0239166	0.0101035	0.0253071	-0.00576857	0.0112494			-0.140408	-0.202868	-0.0295838	0.129995	-0.173217	-0.00846206							5.88771	6.11328	5.78096	6.44561							222.634	227.08	217.744	236.417							20.3628	18.9386	16.3244	21.5528
	-0.0185308	0.00829046	-0.00802122	-0.0137547	-0.0427489	-0.00918245			-0.143532	-0.245281	-0.0167721	0.103953	-0.161758	0.0040384							5.91106	6.13661	5.80395	6.46926							223.569	228.027	218.662	237.393							20.4351	18.9981	16.3775	21.6188
	-0.0185308	0.00829046	-0.00802122	-0.0137547	-0.0427489	-0.00918245			-0.143532	-0.245281	-0.0167721	0.103953	-0.161758	0.0040384							5.93441	6.15993	5.82689	6.49296							224.505	228.974	219.577	238.371							20.5074	19.0577	16.4299	21.6855
	0.0220928	0.0301672	0.00979036	0.0172346	-0.012279	0.0100483			-0.104469	-0.220279	-0.0077088	0.135463	-0.137018	0.0119718							5.95776	6.18325	5.84978	6.51672							225.441	229.921	220.491	239.352							20.5797	19.1172	16.4816	21.7528
	0.0220928	0.0301672	0.00979036	0.0172346	-0.012279	0.0100483			-0.104469	-0.220279	-0.0077088	0.135463	-0.137018	0.0119718							5.98111	6.20657	5.87261	6.54054							226.377	230.868	221.402	240.334							20.6519	19.1767	16.5327	21.8208
	-0.022048	0.038201	0.00385355	0.00265007	-0.0172273	0.00163456			-0.149	-0.20019	-0.0195836	0.12062	-0.176341	-0.0240865							6.00446	6.22989	5.89538	6.56441							227.312	231.815	222.311	241.319							20.7242	19.2363	16.5831	21.8894
	-0.022048	0.038201	0.00385355	0.00265007	-0.0172273	0.00163456			-0.149	-0.20019	-0.0195836	0.12062	-0.176341	-0.0240865							6.02781	6.25322	5.9181	6.58833							228.248	232.762	223.219	242.305							20.7965	19.2958	16.6329	21.9587
	-0.0322027	-0.00153075	0.0101032	-0.0127143	-0.0273839	0.0124519			-0.118532	-0.239032	-0.00645873	0.11463	-0.166445	0.0110099							6.05116	6.27654	5.94076	6.61231							229.184	233.709	224.124	243.293							20.8688	19.3553	16.6821	22.0285
	-0.0322027	-0.00153075	0.0101032	-0.0127143	-0.0273839	0.0124519			-0.118532	-0.239032	-0.00645873	0.11463	-0.166445	0.0110099							6.07451	6.29986	5.96337	6.63635							230.119	234.656	225.028	244.284							20.9411	19.4149	16.7307	22.099
	0.0158434	0.0127558	0.0507289	0.0349428	-0.000820276	0.014135			-0.100563	-0.191709	0.00135263	0.131297	-0.164882	-0.0058173							6.09786	6.32318	5.98593	6.66044							231.055	235.603	225.929	245.276							21.0134	19.4744	16.7787	22.1701
	0.0158434	0.0127558	0.0507289	0.0349428	-0.000820276	0.014135			-0.100563	-0.191709	0.00135263	0.131297	-0.164882	-0.0058173							6.1212	6.34651	6.00843	6.68458							231.991	236.55	226.829	246.27							21.0857	19.5339	16.826	22.2418
	-0.0310297	0.0212375	0.020103	-0.00151653	-0.0349351	-0.0202407			-0.134546	-0.201084	-0.0352086	0.10265	-0.177383	-0.00533694							6.14455	6.36983	6.03088	6.70877							232.927	237.496	227.727	247.266							21.1579	19.5935	16.8728	22.3141
	-0.0310297	0.0212375	0.020103	-0.00151653	-0.0349351	-0.0202407			-0.134546	-0.201084	-0.0352086	0.10265	-0.177383	-0.00533694							6.1679	6.39315	6.05328	6.73302							233.862	238.443	228.623	248.264							21.2302	19.653	16.919	22.387
	-0.0228281	0.00829155	0.0185405	-0.00568218	-0.00785267	-0.00774079			-0.117359	-0.238584	-0.0102086	0.11515	-0.166185	0.0167789							6.19125	6.41647	6.07563	6.75732							234.798	239.39	229.517	249.264							21.3025	19.7125	16.9646	22.4605
	-0.0228281	0.00829155	0.0185405	-0.00568218	-0.00785267	-0.00774079			-0.117359	-0.238584	-0.0102086	0.11515	-0.166185	0.0167789							6.2146	6.4398	6.09792	6.78167							235.734	240.337	230.409	250.265							21.3748	19.7721	17.0096	22.5345
	0.00998402	0.0181128	0.0413532	0.0372872	0.00464746	-0.00100902			-0.152905	-0.218048	-0.0248959	0.100307	-0.176862	0.00668345							6.23795	6.46312	6.12016	6.80607							236.669	241.284	231.3	251.269							21.4471	19.8316	17.0541	22.6091
	0.00998402	0.0181128	0.0413532	0.0372872	0.00464746	-0.00100902			-0.152905	-0.218048	-0.0248959	0.100307	-0.176862	0.00668345							6.2613	6.48644	6.14235	6.83053							237.605	242.231	232.189	252.273							21.5194	19.8911	17.098	22.6842
	-0.0329847	-0.00197653	0.030416	-0.0163592	-0.0302481	-0.0353847			-0.151343	-0.229208	-0.0214589	0.106296	-0.177644	0.0143756							6.28465	6.50976	6.16449	6.85503							238.541	243.178	233.076	253.28							21.5916	19.9507	17.1414	22.7599
	-0.0329847	-0.00197653	0.030416	-0.0163592	-0.0302481	-0.0353847			-0.151343	-0.229208	-0.0214589	0.106296	-0.177644	0.0143756							6.308	6.53308	6.18659	6.87958							239.477	244.125	233.961	254.288							21.6639	20.0102	17.1843	22.8361
	-0.00446986	0.0074	0.047916	0.0393691	0.00464809	0.00379779			-0.104467	-0.210013	0.00666689	0.134422	-0.150559	-0.00413414							6.33135	6.55641	6.20863	6.90419							240.412	245.072	234.845	255.298							21.7362	20.0697	17.2266	22.9128
	-0.00446986	0.0074	0.047916	0.0393691	0.00464809	0.00379779			-0.104467	-0.210013	0.00666689	0.134422	-0.150559	-0.00413414							6.3547	6.57973	6.23062	6.92884							241.348	246.019	235.727	256.31							21.8085	20.1293	17.2684	22.9901
	-0.0193109	0.0288277	0.0335407	0.0172349	0.00464936	0.0112491			-0.145485	-0.21046	-0.0314591	0.104213	-0.178165	-0.00533725							6.37805	6.60305	6.25256	6.95354							242.284	246.966	236.608	257.323							21.8808	20.1888	17.3098	23.0678
	-0.0193109	0.0288277	0.0335407	0.0172349	0.00464936	0.0112491			-0.145485	-0.21046	-0.0314591	0.104213	-0.178165	-0.00533725							6.4014	6.62637	6.27446	6.97829							243.219	247.912	237.487	258.338							21.9531	20.2483	17.3506	23.1461
	-0.0431414	-0.00108389	0.0232284	-0.00385907	-0.0133204	-0.0125476			-0.135329	-0.210013	-0.00239684	0.100308	-0.171133	0.0114908							6.42475	6.6497	6.29631	7.00308							244.155	248.859	238.365	259.354							22.0254	20.3078	17.3909	23.2248
	-0.0431414	-0.00108389	0.0232284	-0.00385907	-0.0133204	-0.0125476			-0.135329	-0.210013	-0.00239684	0.100308	-0.171133	0.0114908							6.4481	6.67302	6.31811	7.02792							245.091	249.806	239.241	260.372							22.0976	20.3674	17.4308	23.304
	0.0205307	0.00829046	0.05979	0.023484	0.0174089	0.0170189			-0.1365	-0.214475	0.00197824	0.12661	-0.135456	0.000432931							6.47145	6.69634	6.33987	7.05281							246.027	250.753	240.116	261.391							22.1699	20.4269	17.4702	23.3836
	0.0205307	0.00829046	0.05979	0.023484	0.0174089	0.0170189			-0.1365	-0.214475	0.00197824	0.12661	-0.135456	0.000432931							6.4948	6.71966	6.36158	7.07774							246.962	251.7	240.989	262.411							22.2422	20.4864	17.5091	23.4638
	-0.0478277	0.0239166	0.0304157	0.00134958	-0.0346757	-0.00846118			-0.144313	-0.223851	-0.0248963	0.101089	-0.18207	-0.021923							6.51815	6.74299	6.38325	7.10272							247.898	252.647	241.861	263.433							22.3145	20.546	17.5476	23.5443
	-0.0478277	0.0239166	0.0304157	0.00134958	-0.0346757	-0.00846118			-0.144313	-0.223851	-0.0248963	0.101089	-0.18207	-0.021923							6.5415	6.76631	6.40488	7.12774							248.834	253.594	242.731	264.456							22.3868	20.6055	17.5857	23.6253
	-0.0458746	0.00918419	0.0216651	0.00942116	-0.00316504	0.00932675			-0.112672	-0.243495	-0.0095841	0.118536	-0.169049	-0.0084603							6.56485	6.78963	6.42646	7.1528							249.769	254.541	243.601	265.481							22.4591	20.665	17.6233	23.7068
	-0.0458746	0.00918419	0.0216651	0.00942116	-0.00316504	0.00932675			-0.112672	-0.243495	-0.0095841	0.118536	-0.169049	-0.0084603							6.5882	6.81295	6.44799	7.17791							250.705	255.488	244.469	266.507							22.5313	20.7246	17.6605	23.7886
	-0.0142355	0.0364157	0.0454154	0.0398907	0.0054301	-0.00629825			-0.13611	-0.175637	0.00229105	0.116191	-0.179468	-0.00750018							6.61155	6.83627	6.46949	7.20306							251.641	256.435	245.335	267.534							22.6036	20.7841	17.6973	23.8709
	-0.0142355	0.0364157	0.0454154	0.0398907	0.0054301	-0.00629825			-0.13611	-0.175637	0.00229105	0.116191	-0.179468	-0.00750018							6.6349	6.8596	6.49094	7.22825							252.577	257.382	246.2	268.563							22.6759	20.8436	17.7337	23.9536
	-0.0665779	0.035971	0.0332275	-0.00932807	-0.0307688	-0.0406719			-0.15486	-0.220281	-0.0214589	0.100046	-0.178685	0.00644224							6.65825	6.88292	6.51235	7.25348							253.512	258.328	247.065	269.592							22.7482	20.9032	17.7697	24.0366
	-0.0665779	0.035971	0.0332275	-0.00932807	-0.0307688	-0.0406719			-0.15486	-0.220281	-0.0214589	0.100046	-0.178685	0.00644224							6.6816	6.90624	6.53373	7.27876							254.448	259.275	247.927	270.623							22.8205	20.9627	17.8053	24.1201
	-0.054079	-0.000190157	0.0297904	0.0143704	-0.0138411	-0.00317342			-0.144313	-0.217601	-0.000521529	0.146922	-0.158372	0.00235553							6.70495	6.92956	6.55506	7.30407							255.384	260.222	248.789	271.655							22.8928	21.0222	17.8406	24.2039
	-0.054079	-0.000190157	0.0297904	0.0143704	-0.0138411	-0.00317342			-0.144313	-0.217601	-0.000521529	0.146922	-0.158372	0.00235553							6.7283	6.95289	6.57635	7.32942							256.319	261.169	249.65	272.689							22.9651	21.0818	17.8755	24.2881
	-0.0450945	0.0498096	0.02854	0.0154112	-0.0193101	0.00547948			-0.189235	-0.195281	-0.0155213	0.114369	-0.203424	-0.0156727							6.75165	6.97621	6.59761	7.35481							257.255	262.116	250.509	273.723							23.0373	21.1413	17.91	24.3726
	-0.0450945	0.0498096	0.02854	0.0154112	-0.0193101	0.00547948			-0.189235	-0.195281	-0.0155213	0.114369	-0.203424	-0.0156727							6.775	6.99953	6.61883	7.38024							258.191	263.063	251.368	274.758							23.1096	21.2008	17.9442	24.4575
	-0.0642338	0.0230228	0.0147903	-0.00333836	-0.0174873	-0.0130288			-0.161891	-0.238138	-0.0358346	0.121141	-0.183632	0.0146166							6.79835	7.02285	6.64001	7.4057							259.127	264.01	252.225	275.795							23.1819	21.2604	17.978	24.5427
	-0.0642338	0.0230228	0.0147903	-0.00333836	-0.0174873	-0.0130288			-0.161891	-0.238138	-0.0358346	0.121141	-0.183632	0.0146166							6.82169	7.04618	6.66115	7.4312							260.062	264.957	253.081	276.833							23.2542	21.3199	18.0115	24.6283
	-0.0036869	0.0194523	0.041666	0.0318176	0.0119386	0.0134138			-0.12908	-0.223851	-0.00802199	0.156297	-0.171914	0.00668287							6.84504	7.0695	6.68226	7.45674							260.998	265.904	253.936	277.871							23.3265	21.3794	18.0447	24.7142
	-0.0036869	0.0194523	0.041666	0.0318176	0.0119386	0.0134138			-0.12908	-0.223851	-0.00802199	0.156297	-0.171914	0.00668287							6.86839	7.09282	6.70333	7.48231							261.934	266.851	254.791	278.911							23.3988	21.439	18.0776	24.8004
	-0.0568132	0.0364157	0.0194785	0.00707862	-0.0117583	-0.00533606			-0.176345	-0.235906	-0.0198971	0.105516	-0.183373	-0.0209611							6.89174	7.11614	6.72437	7.50792							262.869	267.798	255.644	279.951							23.4711	21.4985	18.1101	24.8869
	-0.0568132	0.0364157	0.0194785	0.00707862	-0.0117583	-0.00533606			-0.176345	-0.235906	-0.0198971	0.105516	-0.183373	-0.0209611							6.91509	7.13946	6.74537	7.53356							263.805	268.745	256.496	280.993							23.5433	21.558	18.1424	24.9737
	-0.0130634	0.0203438	0.0260402	0.00317142	-0.00550854	0.00500059			-0.122828	-0.229209	0.000728929	0.121141	-0.170874	-0.00894271							6.93844	7.16279	6.76634	7.55923							264.741	269.691	257.348	282.035							23.6156	21.6176	18.1743	25.0608
	-0.0130634	0.0203438	0.0260402	0.00317142	-0.00550854	0.00500059			-0.122828	-0.229209	0.000728929	0.121141	-0.170874	-0.00894271							6.96179	7.18611	6.78728	7.58494							265.677	270.638	258.198	283.079							23.6879	21.6771	18.206	25.1482
	0.010766	0.0560592	0.0410411	0.0279113	0.0202737	0.0153358			-0.137282	-0.217154	-0.0161469	0.112547	-0.173217	0.00307709							6.98514	7.20943	6.80818	7.61068							266.612	271.585	259.048	284.123							23.7602	21.7366	18.2373	25.2359
	0.010766	0.0560592	0.0410411	0.0279113	0.0202737	0.0153358			-0.137282	-0.217154	-0.0161469	0.112547	-0.173217	0.00307709							7.00849	7.23275	6.82905	7.63645							267.548	272.532	259.896	285.168							23.8325	21.7962	18.2684	25.3239
	-0.052906	0.0582902	0.029166	-0.0179213	-0.027122	-0.0264912			-0.186502	-0.23769	-0.0152081	0.0977028	-0.178945	-0.017355							7.03184	7.25608	6.8499	7.66226							268.484	273.479	260.744	286.214							23.9048	21.8557	18.2993	25.4121
	-0.052906	0.0582902	0.029166	-0.0179213	-0.027122	-0.0264912			-0.186502	-0.23769	-0.0152081	0.0977028	-0.178945	-0.017355							7.05519	7.2794	6.87071	7.68809							269.419	274.426	261.591	287.261							23.977	21.9152	18.3298	25.5006
	-0.0240021	0.0176659	0.0316657	0.00212969	-0.00212236	0.0191828			-0.145096	-0.226976	-0.00145956	0.120619	-0.160977	0.0165389							7.07854	7.30272	6.89149	7.71395							270.355	275.373	262.437	288.309							24.0493	21.9747	18.3602	25.5893
	-0.0240021	0.0176659	0.0316657	0.00212969	-0.00212236	0.0191828			-0.145096	-0.226976	-0.00145956	0.120619	-0.160977	0.0165389							7.10189	7.32604	6.91224	7.73985							271.291	276.32	263.283	289.357							24.1216	22.0343	18.3902	25.6783
	-0.038454	0.0471317	0.0379157	0.0341614	-0.000820277	0.0102889			-0.166578	-0.210905	-0.0280224	0.102911	-0.185717	-0.00317431							7.12524	7.34937	6.93296	7.76577							272.227	277.267	264.127	290.406							24.1939	22.0938	18.4201	25.7676
	-0.038454	0.0471317	0.0379157	0.0341614	-0.000820277	0.0102889			-0.166578	-0.210905	-0.0280224	0.102911	-0.185717	-0.00317431							7.14859	7.37269	6.95366	7.79172							273.162	278.214	264.971	291.456							24.2662	22.1533	18.4496	25.8571
	-0.0950937	0.0154338	0.0222907	-0.00802599	-0.00628928	-0.0212017			-0.169312	-0.222959	-0.0145844	0.1089	-0.179467	-0.00413443							7.17194	7.39601	6.97432	7.8177							274.098	279.161	265.814	292.507							24.3385	22.2129	18.479	25.9468
	-0.0950937	0.0154338	0.0222907	-0.00802599	-0.00628928	-0.0212017			-0.169312	-0.222959	-0.0145844	0.1089	-0.179467	-0.00413443							7.19529	7.41933	6.99496	7.8437							275.034	280.107	266.657	293.558							24.4108	22.2724	18.5081	26.0367
	-0.0470476	0.00516677	0.0579162	0.0104635	0.00621085	-0.00365378			-0.14822	-0.21403	0.00103983	0.130256	-0.146654	-0.0264906							7.21864	7.44265	7.01557	7.86973							275.969	281.054	267.498	294.61							24.483	22.3319	18.537	26.1269
	-0.0470476	0.00516677	0.0579162	0.0104635	0.00621085	-0.00365378			-0.14822	-0.21403	0.00103983	0.130256	-0.146654	-0.0264906							7.24199	7.46598	7.03616	7.89579							276.905	282.001	268.339	295.663							24.5553	22.3915	18.5657	26.2172
	-0.0720472	0.0292746	0.0357284	0.00186997	-0.012279	-0.00701893			-0.192751	-0.228761	-0.0248971	0.0937959	-0.181549	-0.021442							7.26534	7.4893	7.05672	7.92188							277.841	282.948	269.18	296.717							24.6276	22.451	18.5942	26.3078
	-0.0720472	0.0292746	0.0357284	0.00186997	-0.012279	-0.00701893			-0.192751	-0.228761	-0.0248971	0.0937959	-0.181549	-0.021442							7.28869	7.51262	7.07726	7.94799							278.777	283.895	270.019	297.771							24.6999	22.5105	18.6225	26.3986
	-0.0782967	0.0145411	0.0141662	-0.00255699	-0.010715	-0.0183178			-0.153298	-0.239477	-0.00364691	0.10812	-0.179727	-0.00100933							7.31204	7.53594	7.09777	7.97412							279.712	284.842	270.858	298.826							24.7722	22.5701	18.6505	26.4896
	-0.0782967	0.0145411	0.0141662	-0.00255699	-0.010715	-0.0183178			-0.153298	-0.239477	-0.00364691	0.10812	-0.179727	-0.00100933							7.33539	7.55927	7.11825	8.00028							280.648	285.789	271.697	299.881							24.8445	22.6296	18.6784	26.5808
	-0.021266	0.0149869	0.0557277	0.0362445	-0.00680999	-0.000769284			-0.165798	-0.230102	-0.0120846	0.143535	-0.166185	0.00115332							7.35874	7.58259	7.13871	8.02647							281.584	286.736	272.535	300.937							24.9167	22.6891	18.7061	26.6722
	-0.021266	0.0149869	0.0557277	0.0362445	-0.00680999	-0.000769284			-0.165798	-0.230102	-0.0120846	0.143535	-0.166185	0.00115332							7.38209	7.60591	7.15915	8.05267							282.519	287.683	273.372	301.994							24.989	22.7487	18.7336	26.7637
	-0.0638447	0.0328451	0.0441654	-0.00516147	-0.0323316	-0.0151921			-0.19197	-0.231441	-0.013646	0.0943166	-0.18832	-0.0130291							7.40544	7.62923	7.17957	8.0789							283.455	288.63	274.208	303.051							25.0613	22.8082	18.7609	26.8555
	-0.0638447	0.0328451	0.0441654	-0.00516147	-0.0323316	-0.0151921			-0.19197	-0.231441	-0.013646	0.0943166	-0.18832	-0.0130291							7.42879	7.65256	7.19996	8.10515							284.391	289.577	275.045	304.109							25.1336	22.8677	18.7881	26.9474
	-0.0556421	0.00784469	0.0316657	0.00447445	-0.0174886	0.0172599			-0.134156	-0.243942	0.00166467	0.131818	-0.16983	-0.00798053							7.45214	7.67588	7.22033	8.13143							285.327	290.523	275.88	305.167							25.2059	22.9273	18.815	27.0395
	-0.0556421	0.00784469	0.0316657	0.00447445	-0.0174886	0.0172599			-0.134156	-0.243942	0.00166467	0.131818	-0.16983	-0.00798053							7.47549	7.6992	7.24068	8.15772							286.262	291.47	276.715	306.226							25.2782	22.9868	18.8418	27.1318
	-0.0247822	0.0310598	0.0413528	0.022963	0.00855434	-0.00100932			-0.200171	-0.210457	-0.0152093	0.101088	-0.191967	-0.0147114							7.49884	7.72252	7.261	8.18404							287.198	292.417	277.549	307.285							25.3505	23.0463	18.8685	27.2242
	-0.0247822	0.0310598	0.0413528	0.022963	0.00855434	-0.00100932			-0.200171	-0.210457	-0.0152093	0.101088	-0.191967	-0.0147114							7.52218	7.74584	7.28131	8.21038							288.134	293.364	278.383	308.345							25.4227	23.1059	18.8949	27.3168
	-0.0517349	0.0185585	0.0260406	-0.0108915	-0.0312895	-0.0298543			-0.197438	-0.232781	-0.0308335	0.108119	-0.196915	-0.0123079							7.54553	7.76917	7.3016	8.23674							289.069	294.311	279.217	309.406							25.495	23.1654	18.9212	27.4095
	-0.0517349	0.0185585	0.0260406	-0.0108915	-0.0312895	-0.0298543			-0.197438	-0.232781	-0.0308335	0.108119	-0.196915	-0.0123079							7.56888	7.79249	7.32186	8.26312							290.005	295.258	280.05	310.466							25.5673	23.2249	18.9474	27.5025
	-0.0146255	-0.00688659	0.0391654	-0.000735469	-0.0216555	0.00692232			-0.136891	-0.247065	-0.0030213	0.128432	-0.176862	-0.0204807							7.59223	7.81581	7.34211	8.28952							290.941	296.205	280.882	311.528							25.6396	23.2845	18.9734	27.5955
	-0.0146255	-0.00688659	0.0391654	-0.000735469	-0.0216555	0.00692232			-0.136891	-0.247065	-0.0030213	0.128432	-0.176862	-0.0204807							7.61558	7.83913	7.36234	8.31593							291.877	297.152	281.714	312.59							25.7119	23.344	18.9993	27.6887
	-0.0443115	0.0257018	0.0497905	0.0102032	-0.0320715	0.000192607			-0.185719	-0.215814	-0.0233334	0.0992662	-0.189362	-0.0433164
	-0.0443115	0.0257018	0.0497905	0.0102032	-0.0320715	0.000192607			-0.185719	-0.215814	-0.0233334	0.0992662	-0.189362	-0.0433164
	-0.0654068	0.0194523	0.020103	-0.0101091	-0.028164	-4.77181e-05			-0.161891	-0.253763	-0.00270888	0.113329	-0.179207	0.00548124
	-0.0654068	0.0194523	0.020103	-0.0101091	-0.028164	-4.77181e-05			-0.161891	-0.253763	-0.00270888	0.113329	-0.179207	0.00548124
	-0.022438	0.00472099	0.0629165	0.0273919	-0.0182687	0.0129328			-0.150173	-0.204656	-0.00177237	0.117495	-0.154465	0.0112493
	-0.022438	0.00472099	0.0629165	0.0273919	-0.0182687	0.0129328			-0.150173	-0.204656	-0.00177237	0.117495	-0.154465	0.0112493
	-0.0493898	0.0261476	0.0247905	-0.00385939	-0.0500394	0.0050003			-0.190014	-0.216262	-0.00895888	0.0755674	-0.172435	-0.0135098
	-0.0493898	0.0261476	0.0247905	-0.00385939	-0.0500394	0.0050003			-0.190014	-0.216262	-0.00895888	0.0755674	-0.172435	-0.0135098
	-0.0646248	0.0109695	0.0360404	-0.0119329	-0.0323322	0.00524004			-0.146266	-0.228317	0.0113536	0.103432	-0.166186	0.00307709
	-0.0646248	0.0109695	0.0360404	-0.0119329	-0.0323322	0.00524004			-0.146266	-0.228317	0.0113536	0.103432	-0.166186	0.00307709
	-0.0111093	0.0373094	0.0476035	0.0216619	-0.00629055	-0.00365466			-0.183375	-0.189478	-0.0136471	0.127129	-0.191446	-0.00533607
	-0.0111093	0.0373094	0.0476035	0.0216619	-0.00629055	-0.00365466			-0.183375	-0.189478	-0.0136471	0.127129	-0.191446	-0.00533607
	-0.0646248	0.0346315	0.0322898	-0.0179223	-0.0328523	-0.0118269			-0.203298	-0.237244	-0.0052075	0.0914524	-0.193529	-0.00918216
	-0.0646248	0.0346315	0.0322898	-0.0179223	-0.0328523	-0.0118269			-0.203298	-0.237244	-0.0052075	0.0914524	-0.193529	-0.00918216
	-0.0462656	0.00516568	0.0422912	0.0109836	-0.0195714	0.023268			-0.126343	-0.213583	0.0201034	0.134421	-0.177122	-0.020481
	-0.0462656	0.00516568	0.0422912	0.0109836	-0.0195714	0.023268			-0.126343	-0.213583	0.0201034	0.134421	-0.177122	-0.020481
	-0.0646248	0.0319514	0.0401039	0.0247864	-0.011497	0.0158176			-0.187283	-0.201085	-0.00864683	0.109162	-0.206811	-0.00870151
	-0.0646248	0.0319514	0.0401039	0.0247864	-0.011497	0.0158176			-0.187283	-0.201085	-0.00864683	0.109162	-0.206811	-0.00870151
	-0.0857201	-0.0149225	0.0154159	-0.0145364	-0.0378	-0.0108656			-0.188063	-0.241262	-0.00270888	0.111506	-0.186497	0.0069229
	-0.0857201	-0.0149225	0.0154159	-0.0145364	-0.0378	-0.0108656			-0.188063	-0.241262	-0.00270888	0.111506	-0.186497	0.0069229
	-0.0240002	-0.00644081	0.0341651	0.0232237	-0.0180074	0.010048			-0.166187	-0.220727	0.00604089	0.138068	-0.174258	-0.000768996
	-0.0240002	-0.00644081	0.0341651	0.0232237	-0.0180074	0.010048			-0.166187	-0.220727	0.00604089	0.138068	-0.174258	-0.000768996
	-0.0747814	0.0315056	0.0410407	0.00108859	-0.0367585	-0.0118278			-0.217751	-0.217601	-0.0127095	0.10864	-0.203165	-0.0320181
	-0.0747814	0.0315056	0.0410407	0.00108859	-0.0367585	-0.0118278			-0.217751	-0.217601	-0.0127095	0.10864	-0.203165	-0.0320181
	-0.0919685	-0.00733454	0.0397903	-0.00776564	-0.043789	-0.0199998			-0.185328	-0.247959	-0.00520979	0.107859	-0.188581	0.015817
	-0.0919685	-0.00733454	0.0397903	-0.00776564	-0.043789	-0.0199998			-0.185328	-0.247959	-0.00520979	0.107859	-0.188581	0.015817
	-0.0540781	0.0221302	0.0516658	0.0312962	-0.00602925	-0.00822173			-0.187282	-0.205993	-0.0023976	0.13364	-0.179466	-0.00148998
	-0.0540781	0.0221302	0.0516658	0.0312962	-0.00602925	-0.00822173			-0.187282	-0.205993	-0.0023976	0.13364	-0.179466	-0.00148998
	-0.115797	0.00159621	0.0288532	-0.00724525	-0.033373	-0.0183178			-0.19314	-0.230994	-0.00458418	0.105517	-0.189363	0.00139482
	-0.115797	0.00159621	0.0288532	-0.00724525	-0.033373	-0.0183178			-0.19314	-0.230994	-0.00458418	0.105517	-0.189363	0.00139482
	-0.0966568	-0.0184931	0.0526027	-0.0168809	-0.0135817	0.0059616			-0.167359	-0.23769	0.00604089	0.131817	-0.163841	0.00764359
	-0.0966568	-0.0184931	0.0526027	-0.0168809	-0.0135817	0.0059616			-0.167359	-0.23769	0.00604089	0.131817	-0.163841	0.00764359
	-0.054079	0.00918528	0.058541	0.0208805	-0.00368575	0.00740239			-0.193533	-0.226977	-0.00739676	0.101088	-0.210196	0.0057201
	-0.054079	0.00918528	0.058541	0.0208805	-0.00368575	0.00740239			-0.193533	-0.226977	-0.00739676	0.101088	-0.210196	0.0057201
	-0.0986099	0.00382617	0.0222907	-0.0314638	-0.033373	-0.00221212			-0.20408	-0.237244	-0.0192719	0.107339	-0.185195	0.00836573
	-0.0986099	0.00382617	0.0222907	-0.0314638	-0.033373	-0.00221212			-0.20408	-0.237244	-0.0192719	0.107339	-0.185195	0.00836573
	-0.0267353	-0.00911764	0.0347915	-0.00229695	-0.00915348	0.0232689			-0.14822	-0.213582	-0.00177199	0.131298	-0.140144	0.0100471
	-0.0267353	-0.00911764	0.0347915	-0.00229695	-0.00915348	0.0232689			-0.14822	-0.213582	-0.00177199	0.131298	-0.140144	0.0100471
	-0.0736093	0.0181117	0.0260402	0.00811971	-0.0174873	0.0100492			-0.182204	-0.223404	-0.013646	0.100308	-0.190404	-0.0305764
	-0.0736093	0.0181117	0.0260402	0.00811971	-0.0174873	0.0100492			-0.182204	-0.223404	-0.013646	0.100308	-0.190404	-0.0305764
	-0.119312	-0.0193868	0.0135402	-0.00958811	-0.0294667	-0.0118263			-0.131814	-0.249298	-0.0145844	0.120881	-0.175039	-0.0103853
	-0.119312	-0.0193868	0.0135402	-0.00958811	-0.0294667	-0.0118263			-0.131814	-0.249298	-0.0145844	0.120881	-0.175039	-0.0103853
	-0.0560312	-0.00644081	0.057291	0.0156719	0.00907378	-0.00413473			-0.159548	-0.218495	-0.00145994	0.148745	-0.160195	-0.0101443
	-0.0560312	-0.00644081	0.057291	0.0156719	0.00907378	-0.00413473			-0.159548	-0.218495	-0.00145994	0.148745	-0.160195	-0.0101443
	-0.0915785	0.0185607	-0.00708434	-0.00151558	-0.0351964	-0.0113463			-0.199391	-0.222511	-0.0267724	0.0904119	-0.177644	-0.0337019
	-0.0915785	0.0185607	-0.00708434	-0.00151558	-0.0351964	-0.0113463			-0.199391	-0.222511	-0.0267724	0.0904119	-0.177644	-0.0337019
	-0.0825958	-0.00242339	0.0257278	-0.0244314	-0.0247791	0.0266346			-0.13689	-0.255995	-0.0111474	0.113068	-0.156289	0.00908496
	-0.0825958	-0.00242339	0.0257278	-0.0244314	-0.0247791	0.0266346			-0.13689	-0.255995	-0.0111474	0.113068	-0.156289	0.00908496
	-0.0622816	0.0292735	0.0444774	0.0104638	-0.00576921	0.0131728			-0.19275	-0.220727	-0.0205216	0.121661	-0.185457	-0.0163937
	-0.0622816	0.0292735	0.0444774	0.0104638	-0.00576921	0.0131728			-0.19275	-0.220727	-0.0205216	0.121661	-0.185457	-0.0163937
	-0.118531	0.0292735	-0.00583464	-0.0213078	-0.0297274	0.00283619			-0.199782	-0.264032	-0.0277093	0.111505	-0.186497	-0.0175962
	-0.118531	0.0292735	-0.00583464	-0.0213078	-0.0297274	0.00283619			-0.199782	-0.264032	-0.0277093	0.111505	-0.186497	-0.0175962
	-0.0607195	-0.0131372	0.0332286	-0.00125586	-0.00681062	0.0187027			-0.159155	-0.250636	-0.00895888	0.142234	-0.146654	-0.00149056
	-0.0607195	-0.0131372	0.0332286	-0.00125586	-0.00681062	0.0187027			-0.159155	-0.250636	-0.00895888	0.142234	-0.146654	-0.00149056
	-0.0978289	0.0114174	0.0294776	0.0115059	-0.0247791	0.0141342			-0.216578	-0.21403	-0.0195843	0.0893696	-0.197696	-0.0296157
	-0.0978289	0.0114174	0.0294776	0.0115059	-0.0247791	0.0141342			-0.216578	-0.21403	-0.0195843	0.0893696	-0.197696	-0.0296157
	-0.107204	-0.00688659	0.000727785	-0.0207862	-0.028686	-0.00461479			-0.189235	-0.241708	-0.00458457	0.105515	-0.1878	-0.00653888
	-0.107204	-0.00688659	0.000727785	-0.0207862	-0.028686	-0.00461479			-0.189235	-0.241708	-0.00458457	0.105515	-0.1878	-0.00653888
	-0.0556412	0.0074	0.0226032	0.0156725	0.000481172	0.0105299			-0.165406	-0.199745	-0.00864645	0.119318	-0.160196	0.00235554
	-0.0556412	0.0074	0.0226032	0.0156725	0.000481172	0.0105299			-0.165406	-0.199745	-0.00864645	0.119318	-0.160196	0.00235554
	-0.0872803	0.0257018	0.00979112	-0.017661	-0.0323309	0.0052418			-0.196265	-0.23412	-0.0189602	0.0953586	-0.186758	-0.0209614
	-0.0872803	0.0257018	0.00979112	-0.017661	-0.0323309	0.0052418			-0.196265	-0.23412	-0.0189602	0.0953586	-0.186758	-0.0209614
	-0.0771255	0.00427413	0.0126033	-0.00255826	0.00126318	0.0160573			-0.147827	-0.255995	-0.00395933	0.128953	-0.168268	-0.0144717
	-0.0771255	0.00427413	0.0126033	-0.00255826	0.00126318	0.0160573			-0.147827	-0.255995	-0.00395933	0.128953	-0.168268	-0.0144717
	-0.053298	0.0292724	0.0313533	0.0237444	0.00204393	0.00860577			-0.183765	-0.235012	-0.00302244	0.118796	-0.164363	-0.011346
	-0.053298	0.0292724	0.0313533	0.0237444	0.00204393	0.00860577			-0.183765	-0.235012	-0.00302244	0.118796	-0.164363	-0.011346
	-0.122437	0.00382508	0.00635332	-0.00672359	-0.0456112	-0.0219224			-0.174782	-0.231439	-0.0417714	0.103172	-0.182592	-0.0151927
	-0.122437	0.00382508	0.00635332	-0.00672359	-0.0456112	-0.0219224			-0.174782	-0.231439	-0.0417714	0.103172	-0.182592	-0.0151927
	-0.069313	-0.000190158	0.0266651	0.0221823	-0.0177474	0.0242308			-0.12361	-0.22296	-0.0130219	0.134942	-0.162279	-0.00629766
	-0.069313	-0.000190158	0.0266651	0.0221823	-0.0177474	0.0242308			-0.12361	-0.22296	-0.0130219	0.134942	-0.162279	-0.00629766
	-0.0763445	0.0426663	0.00666498	0.0195781	-0.000820278	0.0223079			-0.157204	-0.220728	-0.0108349	0.105776	-0.200039	-0.0178362
	-0.0763445	0.0426663	0.00666498	0.0195781	-0.000820278	0.0223079			-0.157204	-0.220728	-0.0108349	0.105776	-0.200039	-0.0178362
	-0.132984	0.0221302	-0.0133343	-0.0226089	-0.027904	-0.014952			-0.131032	-0.250191	-0.0192719	0.0956209	-0.180247	-0.00918304
	-0.132984	0.0221302	-0.0133343	-0.0226089	-0.027904	-0.014952			-0.131032	-0.250191	-0.0192719	0.0956209	-0.180247	-0.00918304
	-0.0892334	0.0100779	0.0285411	0.0107245	-0.0130597	0.00596189			-0.111891	-0.228762	0.0166652	0.137807	-0.152644	0.0136538
	-0.0892334	0.0100779	0.0285411	0.0107245	-0.0130597	0.00596189			-0.111891	-0.228762	0.0166652	0.137807	-0.152644	0.0136538
	-0.102907	0.0060605	0.0257289	-0.0231293	-0.0341537	-0.00245215			-0.184156	-0.220727	-0.0264588	0.0950996	-0.199518	-0.0447601
	-0.102907	0.0060605	0.0257289	-0.0231293	-0.0341537	-0.00245215			-0.184156	-0.220727	-0.0264588	0.0950996	-0.199518	-0.0447601
	-0.113845	-0.00777922	-0.000209107	-0.0124533	-0.0331117	-0.00677802			-0.15955	-0.25153	0.00635256	0.122703	-0.193789	-0.0132692
	-0.113845	-0.00777922	-0.000209107	-0.0124533	-0.0331117	-0.00677802			-0.15955	-0.25153	0.00635256	0.122703	-0.193789	-0.0132692
	-0.084157	0.00695314	0.0532283	0.0180147	-0.0135817	0.00548241			-0.14314	-0.216262	-0.0148972	0.139109	-0.188842	-0.0173559
	-0.084157	0.00695314	0.0532283	0.0180147	-0.0135817	0.00548241			-0.14314	-0.216262	-0.0148972	0.139109	-0.188842	-0.0173559
	-0.103687	0.0243623	0.00416559	-0.00958875	-0.0385807	-0.0200003			-0.164234	-0.240816	-0.0233342	0.0966611	-0.196916	-0.015673
	-0.103687	0.0243623	0.00416559	-0.00958875	-0.0385807	-0.0200003			-0.164234	-0.240816	-0.0233342	0.0966611	-0.196916	-0.015673
	-0.0751715	-0.00956559	0.00260271	0.014371	-0.0141024	0.00235554			-0.11775	-0.251977	-0.02146	0.131297	-0.172175	0.00692232
	-0.0751715	-0.00956559	0.00260271	0.014371	-0.0141024	0.00235554			-0.11775	-0.251977	-0.02146	0.131297	-0.172175	0.00692232
	-0.0712662	0.0123101	0.019165	0.00707862	-0.002123	-0.0055761			-0.160718	-0.236797	-0.0342717	0.113327	-0.173738	-0.0144711
	-0.0712662	0.0123101	0.019165	0.00707862	-0.002123	-0.0055761			-0.160718	-0.236797	-0.0342717	0.113327	-0.173738	-0.0144711
	-0.10525	-0.0109073	-0.00677115	-0.00854606	-0.0364985	-0.0185584			-0.141577	-0.239924	-0.0136471	0.107859	-0.184936	0.00427843
	-0.10525	-0.0109073	-0.00677115	-0.00854606	-0.0364985	-0.0185584			-0.141577	-0.239924	-0.0136471	0.107859	-0.184936	0.00427843
	-0.0755625	-0.013583	0.0182281	0.0273903	-0.0260818	0.00884522			-0.11189	-0.218048	0.00822748	0.151088	-0.15629	0.00788508
	-0.0755625	-0.013583	0.0182281	0.0273903	-0.0260818	0.00884522			-0.11189	-0.218048	0.00822748	0.151088	-0.15629	0.00788508
	-0.0907965	0.00873732	0.0151031	0.013589	-0.0349358	-0.010625			-0.128298	-0.22028	-0.011147	0.117495	-0.185456	-0.0291351
	-0.0907965	0.00873732	0.0151031	0.013589	-0.0349358	-0.010625			-0.128298	-0.22028	-0.011147	0.117495	-0.185456	-0.0291351
	-0.105639	-0.0126904	-0.011147	0.0133284	-0.0406654	-0.0209616			-0.121655	-0.235011	-0.00864722	0.109943	-0.186759	0.00475938
	-0.105639	-0.0126904	-0.011147	0.0133284	-0.0406654	-0.0209616			-0.121655	-0.235011	-0.00864722	0.109943	-0.186759	0.00475938
	-0.0404062	0.0154338	0.00447763	0.0414525	-0.0219143	0.0213472			-0.122437	-0.189477	-0.00270888	0.147183	-0.158113	-0.011826
	-0.0404062	0.0154338	0.00447763	0.0414525	-0.0219143	0.0213472			-0.122437	-0.189477	-0.00270888	0.147183	-0.158113	-0.011826
	-0.099	0.0118632	-0.000834714	0.0146295	-0.0489993	-0.0231249			-0.153298	-0.23367	-0.0317719	0.109161	-0.197696	-0.0322587
	-0.099	0.0118632	-0.000834714	0.0146295	-0.0489993	-0.0231249			-0.153298	-0.23367	-0.0317719	0.109161	-0.197696	-0.0322587
	-0.083765	-0.0247448	0.0119785	0.00916303	-0.0208722	-0.0103838			-0.131422	-0.21403	-0.00364767	0.130776	-0.179989	-0.00725955
	-0.083765	-0.0247448	0.0119785	0.00916303	-0.0208722	-0.0103838			-0.131422	-0.21403	-0.00364767	0.130776	-0.179989	-0.00725955
	-0.0634556	-0.00599395	0.0301021	0.0464008	-0.0026437	-0.00749871			-0.153297	-0.215815	-0.0173966	0.120359	-0.18181	-0.00317401
	-0.0634556	-0.00599395	0.0301021	0.0464008	-0.0026437	-0.00749871			-0.153297	-0.215815	-0.0173966	0.120359	-0.18181	-0.00317401
	-0.108765	0.0243623	0.0116657	-0.000474799	-0.0422275	-0.0387499			-0.169313	-0.22653	-0.0205224	0.123484	-0.191966	-0.013268
	-0.108765	0.0243623	0.0116657	-0.000474799	-0.0422275	-0.0387499			-0.169313	-0.22653	-0.0205224	0.123484	-0.191966	-0.013268
	-0.085329	0.00427195	0.0182285	0.0227027	-0.028946	0.00331743			-0.136109	-0.224744	0.00416635	0.141453	-0.15655	-0.0180775
	-0.085329	0.00427195	0.0182285	0.0227027	-0.028946	0.00331743			-0.136109	-0.224744	0.00416635	0.141453	-0.15655	-0.0180775
	-0.103687	0.0181128	0.00916475	0.024788	-0.0357171	-0.0101438			-0.163845	-0.193048	-0.00552145	0.109943	-0.189884	-0.0216826
	-0.103687	0.0181128	0.00916475	0.024788	-0.0357171	-0.0101438			-0.163845	-0.193048	-0.00552145	0.109943	-0.189884	-0.0216826
	-0.129469	0.0105237	-0.00489661	-0.00281734	-0.0417075	-0.0380286			-0.144313	-0.235904	0.00229105	0.10786	-0.176341	-0.0219233
	-0.129469	0.0105237	-0.00489661	-0.00281734	-0.0417075	-0.0380286			-0.144313	-0.235904	0.00229105	0.10786	-0.176341	-0.0219233
	-0.0829849	0.00561254	0.0157283	0.0414529	-0.0143625	-0.0238456			-0.0950937	-0.201084	0.00572885	0.161244	-0.180247	-0.00124965
	-0.0829849	0.00561254	0.0157283	0.0414529	-0.0143625	-0.0238456			-0.0950937	-0.201084	0.00572885	0.161244	-0.180247	-0.00124965
	-0.112673	0.0158795	0.00822824	-0.00620288	-0.0315502	-0.0469227			-0.161109	-0.23769	-0.00427137	0.0984851	-0.204727	-0.0219227
	-0.112673	0.0158795	0.00822824	-0.00620288	-0.0315502	-0.0469227			-0.161109	-0.23769	-0.00427137	0.0984851	-0.204727	-0.0219227
	-0.125173	-0.0122446	0.0107276	-0.000213492	-0.0351951	-0.00653857			-0.116579	-0.220725	-0.014584	0.124787	-0.188842	-0.00750106
	-0.125173	-0.0122446	0.0107276	-0.000213492	-0.0351951	-0.00653857			-0.116579	-0.220725	-0.014584	0.124787	-0.188842	-0.00750106
	-0.0493908	-0.0296538	0.0272907	0.0315569	0.0028253	0.0150963			-0.136891	-0.191708	-0.0177098	0.131037	-0.190405	-0.0204801
	-0.0493908	-0.0296538	0.0272907	0.0315569	0.0028253	0.0150963			-0.136891	-0.191708	-0.0177098	0.131037	-0.190405	-0.0204801
	-0.0993891	0.00650627	0.00604013	0.00838007	-0.0310295	-0.0245668			-0.174391	-0.221171	-0.0358342	0.117755	-0.208113	-0.0353836
	-0.0993891	0.00650627	0.00604013	0.00838007	-0.0310295	-0.0245668			-0.174391	-0.221171	-0.0358342	0.117755	-0.208113	-0.0353836
	-0.0685329	-0.00956559	0.000102938	0.0258282	-0.0406642	-0.00677978			-0.124001	-0.23278	0.00822862	0.149525	-0.173217	-0.0291348
	-0.0685329	-0.00956559	0.000102938	0.0258282	-0.0406642	-0.00677978			-0.124001	-0.23278	0.00822862	0.149525	-0.173217	-0.0291348
	-0.0470476	0.0118621	0.0304157	0.0279104	-0.0109763	-0.0250475			-0.166578	-0.217602	-0.00864645	0.119839	-0.201862	-0.0469236
	-0.0470476	0.0118621	0.0304157	0.0279104	-0.0109763	-0.0250475			-0.166578	-0.217602	-0.00864645	0.119839	-0.201862	-0.0469236
	-0.0872822	-0.0287633	0.0188533	-0.00203724	-0.0440503	-0.0437982			-0.157205	-0.266262	-0.0264588	0.116713	-0.187541	-0.0255287
	-0.0872822	-0.0287633	0.0188533	-0.00203724	-0.0440503	-0.0437982			-0.157205	-0.266262	-0.0264588	0.116713	-0.187541	-0.0255287
	-0.0669699	0.00337931	0.0501029	0.0214019	-0.033633	-0.0255281			-0.127907	-0.230548	-0.00208403	0.153172	-0.159674	-0.0144708
	-0.0669699	0.00337931	0.0501029	0.0214019	-0.033633	-0.0255281			-0.127907	-0.230548	-0.00208403	0.153172	-0.159674	-0.0144708
	-0.0724373	0.0172212	0.0151035	-0.000734515	-0.0351958	-0.030577			-0.16697	-0.220727	-0.00895888	0.110463	-0.202384	-0.0281732
	-0.0724373	0.0172212	0.0151035	-0.000734515	-0.0351958	-0.030577			-0.16697	-0.220727	-0.00895888	0.110463	-0.202384	-0.0281732
	-0.101344	-0.000637021	-0.00458418	-0.0163598	-0.0375399	-0.0368267			-0.135719	-0.230102	-0.0180215	0.129474	-0.195873	-0.00798053
	-0.101344	-0.000637021	-0.00458418	-0.0163598	-0.0375399	-0.0368267			-0.135719	-0.230102	-0.0180215	0.129474	-0.195873	-0.00798053
	-0.0712652	0.027934	0.0397907	0.0396307	-0.0112376	-0.00197091			-0.129078	-0.213137	0.000415742	0.129735	-0.184154	-0.0300958
	-0.0712652	0.027934	0.0397907	0.0396307	-0.0112376	-0.00197091			-0.129078	-0.213137	0.000415742	0.129735	-0.184154	-0.0300958
	-0.0915785	0.043559	0.00510286	-0.00880642	-0.0437897	-0.0413938			-0.164624	-0.249299	-0.0367726	0.0948379	-0.202903	-0.0514901
	-0.0915785	0.043559	0.00510286	-0.00880642	-0.0437897	-0.0413938			-0.164624	-0.249299	-0.0367726	0.0948379	-0.202903	-0.0514901
	-0.0865002	0.00293462	0.0279159	-0.00151558	-0.0216542	-0.0094219			-0.0978279	-0.243493	0.0110408	0.123485	-0.181812	-0.0178365
	-0.0865002	0.00293462	0.0279159	-0.00151558	-0.0216542	-0.0094219			-0.0978279	-0.243493	0.0110408	0.123485	-0.181812	-0.0178365
	-0.0552492	0.0386489	0.0166652	0.0208802	-0.0099355	-0.0175965			-0.144704	-0.225638	-0.00520941	0.111505	-0.206029	-0.0255293
	-0.0552492	0.0386489	0.0166652	0.0208802	-0.0099355	-0.0175965			-0.144704	-0.225638	-0.00520941	0.111505	-0.206029	-0.0255293
	-0.105641	0.0100768	0.00104021	-0.0121923	-0.0357171	-0.0382681			-0.127125	-0.260012	-0.0205212	0.107078	-0.181028	-0.0310577
	-0.105641	0.0100768	0.00104021	-0.0121923	-0.0357171	-0.0382681			-0.127125	-0.260012	-0.0205212	0.107078	-0.181028	-0.0310577
	-0.0431414	0.0100768	0.0279151	0.00916176	-0.0318096	-0.0315383			-0.0790787	-0.23412	0.00104059	0.144318	-0.160196	-0.0154324
	-0.0431414	0.0100768	0.0279151	0.00916176	-0.0318096	-0.0315383			-0.0790787	-0.23412	0.00104059	0.144318	-0.160196	-0.0154324
	-0.0747814	0.030613	0.00197862	0.000567886	-0.0242578	-0.012067			-0.123609	-0.227423	-0.019584	0.107078	-0.204987	-0.0464412
	-0.0747814	0.030613	0.00197862	0.000567886	-0.0242578	-0.012067			-0.123609	-0.227423	-0.019584	0.107078	-0.204987	-0.0464412
	-0.0970459	-0.016262	-0.0195843	0.00186965	-0.0320715	-0.0269713			-0.122048	-0.240816	-0.0214589	0.119057	-0.179466	-0.021442
	-0.0970459	-0.016262	-0.0195843	0.00186965	-0.0320715	-0.0269713			-0.122048	-0.240816	-0.0214589	0.119057	-0.179466	-0.021442
	-0.0458746	0.00829046	0.0376041	0.027911	-0.00446776	-0.00293222			-0.103297	-0.209566	-0.0127087	0.14588	-0.182331	-0.0166343
	-0.0458746	0.00829046	0.0376041	0.027911	-0.00446776	-0.00293222			-0.103297	-0.209566	-0.0127087	0.14588	-0.182331	-0.0166343
	-0.0888443	0.0364168	0.0185405	0.00239036	-0.0266025	-0.0303364			-0.174	-0.213139	-0.0280213	0.0953593	-0.184155	-0.0288945
	-0.0888443	0.0364168	0.0185405	0.00239036	-0.0266025	-0.0303364			-0.174	-0.213139	-0.0280213	0.0953593	-0.184155	-0.0288945
	-0.0997829	0.00293463	0.0188537	-0.00177656	-0.0237377	-0.0111068			-0.106422	-0.214923	0.00822748	0.127391	-0.179727	-0.0207205
	-0.0997829	0.00293463	0.0188537	-0.00177656	-0.0237377	-0.0111068			-0.106422	-0.214923	0.00822748	0.127391	-0.179727	-0.0207205
	-0.0853281	0.0502554	0.0479156	0.033381	-0.0174867	-0.0125488			-0.108375	-0.214924	-0.00989653	0.11437	-0.195612	-0.0322596
	-0.0853281	0.0502554	0.0479156	0.033381	-0.0174867	-0.0125488			-0.108375	-0.214924	-0.00989653	0.11437	-0.195612	-0.0322596
	-0.137672	0.0297193	0.00760301	-0.0179223	-0.0544664	-0.0425963			-0.132985	-0.225191	-0.0258347	0.0924938	-0.191706	-0.0236049
	-0.137672	0.0297193	0.00760301	-0.0179223	-0.0544664	-0.0425963			-0.132985	-0.225191	-0.0258347	0.0924938	-0.191706	-0.0236049
	-0.099391	0.00561363	0.00635294	0.00421346	-0.0443091	-0.00846177			-0.0904064	-0.205993	0.00604089	0.130775	-0.166705	-0.0303361
	-0.099391	0.00561363	0.00635294	0.00421346	-0.0443091	-0.00846177			-0.0904064	-0.205993	0.00604089	0.130775	-0.166705	-0.0303361
	-0.113845	0.0413257	0.00322794	0.0297344	-0.027904	0.00860636			-0.168531	-0.211798	-0.00864645	0.112807	-0.197696	-0.0560583
	-0.113845	0.0413257	0.00322794	0.0297344	-0.027904	0.00860636			-0.168531	-0.211798	-0.00864645	0.112807	-0.197696	-0.0560583
	-0.144704	0.0243634	-0.00520941	-0.0155788	-0.0273839	-0.0195185			-0.14822	-0.22028	-0.00489813	0.1201	-0.18155	-0.0269698
	-0.144704	0.0243634	-0.00520941	-0.0155788	-0.0273839	-0.0195185			-0.14822	-0.22028	-0.00489813	0.1201	-0.18155	-0.0269698
	-0.0759535	-0.00108498	0.0132278	0.0138488	-0.0104556	0.0018743			-0.0974379	-0.219388	0.00322908	0.143016	-0.158373	-0.0252884
	-0.0759535	-0.00108498	0.0132278	0.0138488	-0.0104556	0.0018743			-0.0974379	-0.219388	0.00322908	0.143016	-0.158373	-0.0252884
	-0.127517	0.0239176	0.00728983	-0.0192234	-0.0315508	-0.0207204			-0.163844	-0.212244	-0.0186471	0.0865044	-0.187539	-0.0389908
	-0.127517	0.0239176	0.00728983	-0.0192234	-0.0315508	-0.0207204			-0.163844	-0.212244	-0.0186471	0.0865044	-0.187539	-0.0389908
	-0.108376	-0.00911982	0.012915	-0.0153178	-0.0333736	-0.021923			-0.124392	-0.211798	-0.0092713	0.118797	-0.172437	-0.0228846
	-0.108376	-0.00911982	0.012915	-0.0153178	-0.0333736	-0.021923			-0.124392	-0.211798	-0.0092713	0.118797	-0.172437	-0.0228846
	-0.0630617	0.0261476	0.0313537	0.018276	-0.00472716	0.00187459			-0.15486	-0.193048	-0.0136471	0.136245	-0.170091	-0.0365869
	-0.0630617	0.0261476	0.0313537	0.018276	-0.00472716	0.00187459			-0.15486	-0.193048	-0.0136471	0.136245	-0.170091	-0.0365869
	-0.136109	0.0203438	0.0251037	-0.0153162	-0.0469152	-0.0296157			-0.181811	-0.218046	-0.0342709	0.107339	-0.191967	-0.0332206
	-0.136109	0.0203438	0.0251037	-0.0153162	-0.0469152	-0.0296157			-0.181811	-0.218046	-0.0342709	0.107339	-0.191967	-0.0332206
	-0.100952	0.0149891	0.0213539	0.011244	-0.0469145	-0.0231252			-0.136891	-0.208672	-0.00833517	0.15265	-0.175821	0.00235494
	-0.100952	0.0149891	0.0213539	0.011244	-0.0469145	-0.0231252			-0.136891	-0.208672	-0.00833517	0.15265	-0.175821	0.00235494
	-0.0974369	0.0319525	0.0338531	0.0372863	-0.00993549	-0.0168749			-0.163062	-0.192603	-0.0223965	0.110203	-0.21306	-0.041875
	-0.0974369	0.0319525	0.0338531	0.0372863	-0.00993549	-0.0168749			-0.163062	-0.192603	-0.0223965	0.110203	-0.21306	-0.041875
	-0.133767	0.0283797	0.00447801	-0.0153178	-0.0419669	-0.0368273			-0.152124	-0.225638	-0.0217713	0.109682	-0.178426	-0.020721
	-0.133767	0.0283797	0.00447801	-0.0153178	-0.0419669	-0.0368273			-0.152124	-0.225638	-0.0217713	0.109682	-0.178426	-0.020721
	-0.108766	0.00829155	0.0207282	0.0365042	-0.0167053	-0.0149514			-0.114236	-0.199299	0.0188545	0.143797	-0.169832	-0.0204819
	-0.108766	0.00829155	0.0207282	0.0365042	-0.0167053	-0.0149514			-0.114236	-0.199299	0.0188545	0.143797	-0.169832	-0.0204819
	-0.126736	0.0457922	0.0157283	0.00759933	-0.0401447	-0.0187973			-0.190798	-0.194835	-0.0189587	0.125047	-0.192227	-0.0296149
	-0.126736	0.0457922	0.0157283	0.00759933	-0.0401447	-0.0187973			-0.190798	-0.194835	-0.0189587	0.125047	-0.192227	-0.0296149
	-0.132984	-0.0122446	0.00385278	0.00577526	-0.0424882	-0.0238456			-0.14861	-0.199745	-0.014584	0.136504	-0.188061	-0.0111062
	-0.132984	-0.0122446	0.00385278	0.00577526	-0.0424882	-0.0238456			-0.14861	-0.199745	-0.014584	0.136504	-0.188061	-0.0111062
	-0.0822029	-0.00153075	0.0369777	0.0271312	0.00204392	-0.0125485			-0.151733	-0.199298	-0.0183339	0.133901	-0.165925	-0.00605822
	-0.0822029	-0.00153075	0.0369777	0.0271312	0.00204392	-0.0125485			-0.151733	-0.199298	-0.0183339	0.133901	-0.165925	-0.00605822
	-0.12908	0.0292724	0.00916551	-0.00490048	-0.0466539	-0.0377874			-0.180642	-0.229208	-0.0352093	0.095359	-0.194571	-0.0349047
	-0.12908	0.0292724	0.00916551	-0.00490048	-0.0466539	-0.0377874			-0.180642	-0.229208	-0.0352093	0.095359	-0.194571	-0.0349047
	-0.121265	-0.0126904	0.0091659	0.00447414	-0.0333724	-0.010385			-0.147047	-0.221173	-0.0180215	0.132599	-0.16254	-0.0175956
	-0.121265	-0.0126904	0.0091659	0.00447414	-0.0333724	-0.010385			-0.147047	-0.221173	-0.0180215	0.132599	-0.16254	-0.0175956
	-0.0915775	0.00338149	0.0366649	0.00785936	-0.00889472	-0.00389322			-0.180251	-0.188137	-0.020522	0.112807	-0.178946	-0.0425957
	-0.0915775	0.00338149	0.0366649	0.00785936	-0.00889472	-0.00389322			-0.180251	-0.188137	-0.020522	0.112807	-0.178946	-0.0425957
	-0.142361	0.0221291	0.00635256	-0.0267762	-0.0450911	-0.0252887			-0.163454	-0.222959	-0.014272	0.0984845	-0.168008	-0.0325002
	-0.142361	0.0221291	0.00635256	-0.0267762	-0.0450911	-0.0252887			-0.163454	-0.222959	-0.014272	0.0984845	-0.168008	-0.0325002
	-0.0982199	0.0123101	0.0194778	0.0135887	-0.0193095	-0.0113463			-0.116579	-0.222513	-0.000208724	0.122443	-0.146132	-0.02601
	-0.0982199	0.0123101	0.0194778	0.0135887	-0.0193095	-0.0113463			-0.116579	-0.222513	-0.000208724	0.122443	-0.146132	-0.02601
	-0.108375	0.0355241	0.0179157	0.00994282	-0.0221756	-0.00773991			-0.184548	-0.218942	-0.00708433	0.0932768	-0.190926	-0.0425954
	-0.108375	0.0355241	0.0179157	0.00994282	-0.0221756	-0.00773991			-0.184548	-0.218942	-0.00708433	0.0932768	-0.190926	-0.0425954
	-0.127906	0.00382726	-0.00114752	0.000566613	-0.033633	-0.0274519			-0.139235	-0.239923	-0.020522	0.106818	-0.178165	-0.0026919
	-0.127906	0.00382726	-0.00114752	0.000566613	-0.033633	-0.0274519			-0.139235	-0.239923	-0.020522	0.106818	-0.178165	-0.0026919
	-0.0700951	0.0114174	0.0176032	0.0193178	-0.0250385	-0.0130283			-0.134938	-0.182334	-0.00552145	0.117234	-0.154205	-0.0115866
	-0.0700951	0.0114174	0.0176032	0.0193178	-0.0250385	-0.0130283			-0.134938	-0.182334	-0.00552145	0.117234	-0.154205	-0.0115866
	-0.116969	0.0118643	0.0166652	-0.00281671	-0.0331136	-0.0233643			-0.173609	-0.221172	-0.0283341	0.0922344	-0.180768	-0.0401924
	-0.116969	0.0118643	0.0166652	-0.00281671	-0.0331136	-0.0233643			-0.173609	-0.221172	-0.0283341	0.0922344	-0.180768	-0.0401924
	-0.101343	-0.00108607	0.0204151	-0.00958875	-0.0294667	-0.00196974			-0.146266	-0.223851	0.00760301	0.12739	-0.15707	-0.0106244
	-0.101343	-0.00108607	0.0204151	-0.00958875	-0.0294667	-0.00196974			-0.146266	-0.223851	0.00760301	0.12739	-0.15707	-0.0106244
	-0.0919676	0.0091831	0.0260414	0.00421347	-0.0112369	0.0047591			-0.145875	-0.189477	-0.00739676	0.112546	-0.182071	-0.0269719
	-0.0919676	0.0091831	0.0260414	0.00421347	-0.0112369	0.0047591			-0.145875	-0.189477	-0.00739676	0.112546	-0.182071	-0.0269719
	-0.124782	0.0100768	0.00447801	-0.0299007	-0.0320715	-0.0178354			-0.144703	-0.243048	-0.0283341	0.0940575	-0.187541	-0.017595
	-0.124782	0.0100768	0.00447801	-0.0299007	-0.0320715	-0.0178354			-0.144703	-0.243048	-0.0283341	0.0940575	-0.187541	-0.017595
	-0.102126	-0.00956559	0.00604013	-0.00880769	-0.0154039	0.0102884			-0.0986099	-0.236353	0.00947832	0.136506	-0.160196	-0.0149517
	-0.102126	-0.00956559	0.00604013	-0.00880769	-0.0154039	0.0102884			-0.0986099	-0.236353	0.00947832	0.136506	-0.160196	-0.0149517
	-0.107203	-0.000190157	-0.00208441	0.0122866	-0.00707129	-0.00918274			-0.166187	-0.203762	-0.0355225	0.091192	-0.183372	-0.036346
	-0.107203	-0.000190157	-0.00208441	0.0122866	-0.00707129	-0.00918274			-0.166187	-0.203762	-0.0355225	0.091192	-0.183372	-0.036346
	-0.138063	-0.0220658	0.00135378	-0.0366725	-0.0401441	-0.0288933			-0.141969	-0.239923	-0.0261464	0.0950992	-0.165665	-0.011826
	-0.138063	-0.0220658	0.00135378	-0.0366725	-0.0401441	-0.0288933			-0.141969	-0.239923	-0.0261464	0.0950992	-0.165665	-0.011826
	-0.0599394	-0.035014	0.0407279	-0.0119319	-0.0146218	-0.00413443			-0.106812	-0.226975	-0.0136468	0.133641	-0.155248	-0.00100961
	-0.0599394	-0.035014	0.0407279	-0.0119319	-0.0146218	-0.00413443			-0.106812	-0.226975	-0.0136468	0.133641	-0.155248	-0.00100961
	-0.101734	-0.00644081	0.00041536	-0.0106302	-0.0505608	-0.0130285			-0.158376	-0.229656	-0.00739638	0.0953583	-0.190925	-0.0250478
	-0.101734	-0.00644081	0.00041536	-0.0106302	-0.0505608	-0.0130285			-0.158376	-0.229656	-0.00739638	0.0953583	-0.190925	-0.0250478
	-0.106421	-0.00688768	-0.000833954	-0.0194838	-0.0364985	-0.00317225			-0.122438	-0.234564	0.00135339	0.12166	-0.171915	-0.0125473
	-0.106421	-0.00688768	-0.000833954	-0.0194838	-0.0364985	-0.00317225			-0.122438	-0.234564	0.00135339	0.12166	-0.171915	-0.0125473
	-0.069313	-0.00331603	0.0313533	0.00838007	-0.0167072	0.0187024			-0.15486	-0.217155	-0.018958	0.119578	-0.166707	-0.00846206
	-0.069313	-0.00331603	0.0313533	0.00838007	-0.0167072	0.0187024			-0.15486	-0.217155	-0.018958	0.119578	-0.166707	-0.00846206
	-0.130251	0.0033804	0.00697855	-0.0254738	-0.0219136	-0.0147114			-0.168922	-0.235905	-0.0211468	0.0922344	-0.182071	-0.0255296
	-0.130251	0.0033804	0.00697855	-0.0254738	-0.0219136	-0.0147114			-0.168922	-0.235905	-0.0211468	0.0922344	-0.182071	-0.0255296
	-0.101734	-0.0274227	0.00854028	-0.0108905	-0.0190507	0.0122121			-0.0950947	-0.236797	0.0151031	0.130516	-0.171133	-0.00173001
	-0.101734	-0.0274227	0.00854028	-0.0108905	-0.0190507	0.0122121			-0.0950947	-0.236797	0.0151031	0.130516	-0.171133	-0.00173001
	-0.0747824	-0.00287134	0.00697778	0.00707798	0.00620957	0.0131731			-0.138844	-0.22876	-0.0152093	0.10838	-0.183634	-0.0322593
	-0.0747824	-0.00287134	0.00697778	0.00707798	0.00620957	0.0131731			-0.138844	-0.22876	-0.0152093	0.10838	-0.183634	-0.0322593
	-0.115407	-0.0126904	-0.0130223	-0.0442246	-0.0242584	-0.00557727			-0.167359	-0.246619	-0.0392712	0.0844216	-0.165665	-0.0216826
	-0.115407	-0.0126904	-0.0130223	-0.0442246	-0.0242584	-0.00557727			-0.167359	-0.246619	-0.0392712	0.0844216	-0.165665	-0.0216826
	-0.0685301	-0.0153694	0.0116653	-0.0121932	-0.0177474	0.0165371			-0.116969	-0.217155	0.00791543	0.119057	-0.141446	-0.00605823
	-0.0685301	-0.0153694	0.0116653	-0.0121932	-0.0177474	0.0165371			-0.116969	-0.217155	0.00791543	0.119057	-0.141446	-0.00605823
	-0.113454	0.00427413	0.00385317	-0.0314629	-0.0354565	0.0150957			-0.152125	-0.229208	-0.028959	0.0818181	-0.201602	-0.0392314
	-0.113454	0.00427413	0.00385317	-0.0314629	-0.0354565	0.0150957			-0.152125	-0.229208	-0.028959	0.0818181	-0.201602	-0.0392314
	-0.111502	-0.0247448	-0.0077088	-0.0338064	-0.0463951	-4.71335e-05			-0.112283	-0.235458	-0.0355221	0.0945773	-0.178685	-0.0202407
	-0.111502	-0.0247448	-0.0077088	-0.0338064	-0.0463951	-4.71335e-05			-0.112283	-0.235458	-0.0355221	0.0945773	-0.178685	-0.0202407
	-0.0759544	-0.00867295	0.0185401	-0.00151557	-0.0312895	0.0285581			-0.116578	-0.226083	-0.00239645	0.101871	-0.177123	-0.0216829
	-0.0759544	-0.00867295	0.0185401	-0.00151557	-0.0312895	0.0285581			-0.116578	-0.226083	-0.00239645	0.101871	-0.177123	-0.0216829
	-0.12439	0.00382617	-0.00645987	-0.0293794	-0.0508195	0.000192313			-0.164235	-0.261798	-0.0205216	0.069578	-0.211238	-0.0300955
	-0.12439	0.00382617	-0.00645987	-0.0293794	-0.0508195	0.000192313			-0.164235	-0.261798	-0.0205216	0.069578	-0.211238	-0.0300955
	-0.104859	-0.0457278	0.0119785	-0.0252128	-0.0466545	0.0158179			-0.131032	-0.253316	0.00385393	0.0990049	-0.166184	-0.0070204
	-0.104859	-0.0457278	0.0119785	-0.0252128	-0.0466545	0.0158179			-0.131032	-0.253316	0.00385393	0.0990049	-0.166184	-0.0070204
	-0.0970478	-0.0122457	0.0104156	0.0182754	-0.0271233	-0.0036532			-0.149391	-0.203763	-0.0145844	0.0940569	-0.204206	-0.0233652
	-0.0970478	-0.0122457	0.0104156	0.0182754	-0.0271233	-0.0036532			-0.149391	-0.203763	-0.0145844	0.0940569	-0.204206	-0.0233652
	-0.146267	-0.042154	-0.00270964	-0.0304224	-0.0672278	-0.0180766			-0.159546	-0.241708	-0.0111474	0.0716611	-0.186759	-0.0394706
	-0.146267	-0.042154	-0.00270964	-0.0304224	-0.0672278	-0.0180766			-0.159546	-0.241708	-0.0111474	0.0716611	-0.186759	-0.0394706
	-0.0868912	-0.0452799	0.0269779	-0.00333932	-0.0461344	0.000912704			-0.0993919	-0.217601	0.0032287	0.107599	-0.18129	-0.0142305
	-0.0868912	-0.0452799	0.0269779	-0.00333932	-0.0461344	0.000912704			-0.0993919	-0.217601	0.0032287	0.107599	-0.18129	-0.0142305
	-0.127124	-0.00287025	0.0119785	0.0117653	-0.0458731	0.0208659			-0.143142	-0.219386	-0.0173962	0.0573388	-0.207071	-0.0300955
	-0.127124	-0.00287025	0.0119785	0.0117653	-0.0458731	0.0208659			-0.143142	-0.219386	-0.0173962	0.0573388	-0.207071	-0.0300955
	-0.139626	-0.0202805	0.00416521	-0.0330272	-0.0583726	-0.00485541			-0.149783	-0.25644	-0.00802199	0.0734839	-0.198216	-0.0101452
	-0.139626	-0.0202805	0.00416521	-0.0330272	-0.0583726	-0.00485541			-0.149783	-0.25644	-0.00802199	0.0734839	-0.198216	-0.0101452
	-0.068922	-0.00197544	0.0316661	0.00864074	-0.033373	0.0227885			-0.11033	-0.246174	-0.0180226	0.107599	-0.171914	-0.0125491
	-0.068922	-0.00197544	0.0316661	0.00864074	-0.033373	0.0227885			-0.11033	-0.246174	-0.0180226	0.107599	-0.171914	-0.0125491
	-0.12986	0.0167733	0.00572771	-0.0174016	-0.063581	-0.00774108			-0.174391	-0.272065	-0.0208333	0.0620268	-0.210195	-0.0269716
	-0.12986	0.0167733	0.00572771	-0.0174016	-0.063581	-0.00774108			-0.174391	-0.272065	-0.0208333	0.0620268	-0.210195	-0.0269716
	-0.122048	-0.0117988	0.0232284	-0.00724366	-0.0562892	-0.00245274			-0.125955	-0.266263	-0.00489699	0.0964007	-0.175039	-0.0161546
	-0.122048	-0.0117988	0.0232284	-0.00724366	-0.0562892	-0.00245274			-0.125955	-0.266263	-0.00489699	0.0964007	-0.175039	-0.0161546
	-0.101346	0.0033804	0.0688533	0.000567884	-0.0367573	0.0088461			-0.124392	-0.233674	-0.00739676	0.0924954	-0.171654	-0.0135098
	-0.101346	0.0033804	0.0688533	0.000567884	-0.0367573	0.0088461			-0.124392	-0.233674	-0.00739676	0.0924954	-0.171654	-0.0135098
	-0.161111	-0.00152966	0.0363529	-0.0270359	-0.0682679	-0.0142319			-0.170095	-0.251531	-0.0030213	0.080776	-0.209935	-0.039953
	-0.161111	-0.00152966	0.0363529	-0.0270359	-0.0682679	-0.0142319			-0.170095	-0.251531	-0.0030213	0.080776	-0.209935	-0.039953
	-0.105249	-0.0408167	0.0269782	-0.00646356	-0.0510815	0.0170186			-0.109937	-0.242602	0.00604089	0.116713	-0.165665	-0.0113454
	-0.105249	-0.0408167	0.0269782	-0.00646356	-0.0510815	0.0170186			-0.109937	-0.242602	0.00604089	0.116713	-0.165665	-0.0113454
	-0.121266	-0.0184953	0.023228	0.0185364	-0.043269	0.00932763			-0.185719	-0.254208	-0.00927092	0.079994	-0.218008	-0.0370673
	-0.121266	-0.0184953	0.023228	0.0185364	-0.043269	0.00932763			-0.185719	-0.254208	-0.00927092	0.079994	-0.218008	-0.0370673
	-0.165017	-0.0408156	0.00854067	-0.0272966	-0.0674878	-0.00605733			-0.145875	-0.26269	-0.022709	0.0833795	-0.199778	-0.00341376
	-0.165017	-0.0408156	0.00854067	-0.0272966	-0.0674878	-0.00605733			-0.145875	-0.26269	-0.022709	0.0833795	-0.199778	-0.00341376
	-0.0923605	-0.0104571	0.0347911	0.00707703	-0.0354565	0.0150963			-0.116969	-0.261352	0.00135301	0.121402	-0.182591	-0.0046151
	-0.0923605	-0.0104571	0.0347911	0.00707703	-0.0354565	0.0150963			-0.116969	-0.261352	0.00135301	0.121402	-0.182591	-0.0046151
	-0.119311	-0.0024223	0.0254157	0.00213	-0.0549877	-0.0113469			-0.166578	-0.251085	-0.00677191	0.0708801	-0.203685	-0.0389899
	-0.119311	-0.0024223	0.0254157	0.00213	-0.0549877	-0.0113469			-0.166578	-0.251085	-0.00677191	0.0708801	-0.203685	-0.0389899
	-0.132594	-0.0367982	0.0201034	-0.0174022	-0.0672265	-0.0161534			-0.136109	-0.255102	-0.00114714	0.103693	-0.199778	-0.0132683
	-0.132594	-0.0367982	0.0201034	-0.0174022	-0.0672265	-0.0161534			-0.136109	-0.255102	-0.00114714	0.103693	-0.199778	-0.0132683
	-0.0907974	-0.0207263	0.0482276	0.024267	-0.0377993	-0.00485541			-0.120093	-0.204208	-0.0114598	0.106557	-0.179728	-0.0111059
	-0.0907974	-0.0207263	0.0482276	0.024267	-0.0377993	-0.00485541			-0.120093	-0.204208	-0.0114598	0.106557	-0.179728	-0.0111059
	-0.141971	-0.00152966	0.0285404	-0.02886	-0.100561	-0.0250487			-0.170875	-0.241263	-0.0245835	0.0854636	-0.197956	-0.03322
	-0.141971	-0.00152966	0.0285404	-0.02886	-0.100561	-0.0250487			-0.170875	-0.241263	-0.0245835	0.0854636	-0.197956	-0.03322
	-0.118532	-0.0198337	0.0354156	-0.0085467	-0.0739989	0.00379808			-0.11111	-0.260905	0.00104135	0.119578	-0.180248	-0.0180775
	-0.118532	-0.0198337	0.0354156	-0.0085467	-0.0739989	0.00379808			-0.11111	-0.260905	0.00104135	0.119578	-0.180248	-0.0180775
	-0.122046	0.0136485	0.0329151	0.00759837	-0.0503001	-0.0077402			-0.159548	-0.226083	-0.00989729	0.0979638	-0.196914	-0.0204816
	-0.122046	0.0136485	0.0329151	0.00759837	-0.0503001	-0.0077402			-0.159548	-0.226083	-0.00989729	0.0979638	-0.196914	-0.0204816
	-0.186502	-0.0122435	0.0119777	-0.0473485	-0.0638416	-0.0108656			-0.165016	-0.218494	-0.0167725	0.0888489	-0.200039	-0.020721
	-0.186502	-0.0122435	0.0119777	-0.0473485	-0.0638416	-0.0108656			-0.165016	-0.218494	-0.0167725	0.0888489	-0.200039	-0.020721
	-0.122829	-0.0198337	0.0251029	-0.0142764	-0.0544657	0.00956825			-0.101735	-0.216263	0.0179157	0.109422	-0.194311	-0.00846148
	-0.122829	-0.0198337	0.0251029	-0.0142764	-0.0544657	0.00956825			-0.101735	-0.216263	0.0179157	0.109422	-0.194311	-0.00846148
	-0.165405	0.0190065	0.0126037	-0.00932871	-0.0562892	0.00283619			-0.17439	-0.220727	-0.00958334	0.0656708	-0.211498	-0.047163
	-0.165405	0.0190065	0.0126037	-0.00932871	-0.0562892	0.00283619			-0.17439	-0.220727	-0.00958334	0.0656708	-0.211498	-0.047163
	-0.172829	-0.0171568	0.0129161	-0.0259948	-0.0497781	-0.00100961			-0.148999	-0.244833	-0.022709	0.104213	-0.207331	-0.0135092
	-0.172829	-0.0171568	0.0129161	-0.0259948	-0.0497781	-0.00100961			-0.148999	-0.244833	-0.022709	0.104213	-0.207331	-0.0135092
	-0.118922	-0.0140299	0.0529159	0.00343272	-0.0367585	0.0129328			-0.12361	-0.212692	0.00197901	0.0919728	-0.185716	-0.00197151
	-0.118922	-0.0140299	0.0529159	0.00343272	-0.0367585	0.0129328			-0.12361	-0.212692	0.00197901	0.0919728	-0.185716	-0.00197151
	-0.181813	-0.00152966	0.00822786	-0.0340677	-0.0729562	-0.00894183			-0.18611	-0.227424	-0.0183339	0.0492657	-0.222175	-0.0238473
	-0.181813	-0.00152966	0.00822786	-0.0340677	-0.0729562	-0.00894183			-0.18611	-0.227424	-0.0183339	0.0492657	-0.222175	-0.0238473
	-0.177907	-0.0104582	0.0266662	-0.00490144	-0.0760817	0.00860636			-0.141189	-0.218941	0.010728	0.0943176	-0.201082	-0.00629767
	-0.177907	-0.0104582	0.0266662	-0.00490144	-0.0760817	0.00860636			-0.141189	-0.218941	0.010728	0.0943176	-0.201082	-0.00629767
	0.893187	1.02079	0.550728	0.509422	0.466365	0.512692			0.879906	0.805613	0.523541	0.573224	0.319232	0.493221
	0.893187	1.02079	0.550728	0.509422	0.466365	0.512692			0.879906	0.805613	0.523541	0.573224	0.319232	0.493221
	5.08615	5.80249	2.11166	2.04926	2.09736	2.21053			5.13147	5.55963	2.09792	2.12244	1.96871	2.2175
	5.08615	5.80249	2.11166	2.04926	2.09736	2.21053			5.13147	5.55963	2.09792	2.12244	1.96871	2.2175
	4.7424	6.33151	1.74073	1.71984	1.50048	1.60524			4.76155	6.10115	1.7326	1.82062	1.33381	1.61245
	4.7424	6.33151	1.74073	1.71984	1.50048	1.60524			4.76155	6.10115	1.7326	1.82062	1.33381	1.61245
	2.92678	4.65829	1.17167	1.16229	0.752303	0.844423			2.87756	4.4007	1.14479	1.2063	0.580169	0.819904
	2.92678	4.65829	1.17167	1.16229	0.752303	0.844423			2.87756	4.4007	1.14479	1.2063	0.580169	0.819904
	1.52678	3.01811	0.695103	0.683119	0.158293	0.243701			1.55412	2.78597	0.688541	0.775567	-0.0117583	0.217982
	1.52678	3.01811	0.695103	0.683119	0.158293	0.243701			1.55412	2.78597	0.688541	0.775567	-0.0117583	0.217982
	-1.37986	-0.119386	-0.678022	-0.62912	-1.31983	-1.2575			-1.39627	-0.294388	-0.71521	-0.530161	-1.46566	-1.28418
	-1.37986	-0.119386	-0.678022	-0.62912	-1.31983	-1.2575			-1.39627	-0.294388	-0.71521	-0.530161	-1.46566	-1.28418
	-10.0506	-9.9993	-4.03959	-3.96011	-4.77348	-4.87361			-10.0408	-10.231	-4.08083	-3.88146	-4.91514	-4.89284
	-10.0506	-9.9993	-4.03959	-3.96011	-4.77348	-4.87361			-10.0408	-10.231	-4.08083	-3.88146	-4.91514	-4.89284
	-9.51697	-11.4462	-3.3424	-3.36454	-3.53155	-3.64428			-9.51736	-11.6622	-3.35896	-3.23954	-3.67582	-3.65678
	-9.51697	-11.4462	-3.3424	-3.36454	-3.53155	-3.64428			-9.51736	-11.6622	-3.35896	-3.23954	-3.67582	-3.65678
	-6.2658	-8.53814	-2.1749	-2.19448	-2.09405	-2.15918			-6.26423	-8.74171	-2.22146	-2.13042	-2.27634	-2.18058
	-6.2658	-8.53814	-2.1749	-2.19448	-2.09405	-2.15918			-6.26423	-8.74171	-2.22146	-2.13042	-2.27634	-2.18058
	-3.7701	-5.62162	-1.32677	-1.37313	-0.971393	-0.97048			-3.75564	-5.83189	-1.37427	-1.31506	-1.11775	-0.985623
	-3.7701	-5.62162	-1.32677	-1.37313	-0.971393	-0.97048			-3.75564	-5.83189	-1.37427	-1.31506	-1.11775	-0.985623
	-0.790016	-2.37787	-0.0633347	-0.151515	0.544231	0.569182			-0.763845	-2.59082	-0.0852093	-0.0796409	0.415586	0.558365
	-0.790016	-2.37787	-0.0633347	-0.151515	0.544231	0.569182			-0.763845	-2.59082	-0.0852093	-0.0796409	0.415586	0.558365
	4.48733	3.94356	2.14292	2.11072	2.70751	2.83721			4.48147	3.72883	2.11573	2.15031	2.54736	2.85332
	4.48733	3.94356	2.14292	2.11072	2.70751	2.83721			4.48147	3.72883	2.11573	2.15031	2.54736	2.85332
	4.1303	4.83151	1.59729	1.57427	1.71663	1.84635			4.14748	4.6132	1.5751	1.64874	1.56845	1.86558
	4.1303	4.83151	1.59729	1.57427	1.71663	1.84635			4.14748	4.6132	1.5751	1.64874	1.56845	1.86558
	2.49944	3.41856	0.965729	0.953692	0.910117	0.994663			2.48772	3.22213	0.939478	1.03911	0.784857	1.005
	2.49944	3.41856	0.965729	0.953692	0.910117	0.994663			2.48772	3.22213	0.939478	1.03911	0.784857	1.005
	1.25373	2.07659	0.530103	0.515671	0.453866	0.516298			1.24397	1.84892	0.497603	0.607077	0.310118	0.502596
	1.25373	2.07659	0.530103	0.515671	0.453866	0.516298			1.24397	1.84892	0.497603	0.607077	0.310118	0.502596
	0.558032	1.16633	0.293853	0.272442	0.160376	0.229278			0.609203	0.951596	0.27729	0.369839	0.028085	0.244664
	0.558032	1.16633	0.293853	0.272442	0.160376	0.229278			0.609203	0.951596	0.27729	0.369839	0.028085	0.244664
	0.238109	0.668559	0.161352	0.166193	-0.0263412	0.0307213			0.218968	0.466772	0.123228	0.221921	-0.162539	0.0408171
	0.238109	0.668559	0.161352	0.166193	-0.0263412	0.0307213			0.218968	0.466772	0.123228	0.221921	-0.162539	0.0408171
	-0.0322037	0.372577	0.0329158	0.0102022	-0.164102	-0.125529			-0.0294676	0.101595	-0.0127087	0.07062	-0.316966	-0.129855
	-0.0322037	0.372577	0.0329158	0.0102022	-0.164102	-0.125529			-0.0294676	0.101595	-0.0127087	0.07062	-0.316966	-0.129855
	-0.156815	0.133737	-0.0464589	-0.0653173	-0.193269	-0.155096			-0.129078	-0.0930475	-0.0855221	0.0164526	-0.316185	-0.152212
	-0.156815	0.133737	-0.0464589	-0.0653173	-0.193269	-0.155096			-0.129078	-0.0930475	-0.0855221	0.0164526	-0.316185	-0.152212
	-0.216578	0.0395415	-0.0730214	-0.0897966	-0.135716	-0.105817			-0.215015	-0.196619	-0.126148	-0.0358905	-0.322956	-0.131538
	-0.216578	0.0395415	-0.0730214	-0.0897966	-0.135716	-0.105817			-0.215015	-0.196619	-0.126148	-0.0358905	-0.322956	-0.131538
	-0.257204	-0.0631359	-0.11396	-0.15386	-0.0997793	-0.0642297			-0.233376	-0.318048	-0.120209	-0.0554214	-0.239883	-0.0543761
	-0.257204	-0.0631359	-0.11396	-0.15386	-0.0997793	-0.0642297			-0.233376	-0.318048	-0.120209	-0.0554214	-0.239883	-0.0543761
	-0.18611	-0.0917102	-0.0689595	-0.098392	-0.0260812	0.0297603			-0.174782	-0.300191	-0.0777096	0.0211409	-0.167748	0.0114897
	-0.18611	-0.0917102	-0.0689595	-0.098392	-0.0260812	0.0297603			-0.174782	-0.300191	-0.0777096	0.0211409	-0.167748	0.0114897
	-0.159939	-0.0613517	-0.0395844	-0.0593276	0.00803427	0.0542786			-0.200562	-0.28769	-0.0598969	0.0146311	-0.152904	0.0208653
	-0.159939	-0.0613517	-0.0395844	-0.0593276	0.00803427	0.0542786			-0.200562	-0.28769	-0.0598969	0.0146311	-0.152904	0.0208653
	-0.147437	-0.0184953	-0.0255211	-0.0507334	0.00178325	0.0367312			-0.109937	-0.257333	-0.0402096	0.0557754	-0.144051	0.069182
	-0.147437	-0.0184953	-0.0255211	-0.0507334	0.00178325	0.0367312			-0.109937	-0.257333	-0.0402096	0.0557754	-0.144051	0.069182
	-0.0876713	0.0453432	0.0166652	0.0234847	0.00516943	0.0184615			-0.0595474	-0.173406	0.0101043	0.118276	-0.152383	0.0405765
	-0.0876713	0.0453432	0.0166652	0.0234847	0.00516943	0.0184615			-0.0595474	-0.173406	0.0101043	0.118276	-0.152383	0.0405765
	-0.131032	0.0913277	0.0288535	0.0221823	-0.064623	-0.0144708			-0.107594	-0.142603	-0.00739599	0.101869	-0.198998	-0.0264906
	-0.131032	0.0913277	0.0288535	0.0221823	-0.064623	-0.0144708			-0.107594	-0.142603	-0.00739599	0.101869	-0.198998	-0.0264906
	-0.124783	0.0922203	0.0444785	0.0185361	-0.0687886	-0.00726043			-0.0650167	-0.122958	0.0485416	0.149786	-0.189623	-0.019037
	-0.124783	0.0922203	0.0444785	0.0185361	-0.0687886	-0.00726043			-0.0650167	-0.122958	0.0485416	0.149786	-0.189623	-0.019037
	-0.0646267	0.148024	0.0551036	0.0575986	-0.038842	0.00740444			-0.0876722	-0.0809942	0.0241657	0.129995	-0.193791	-0.0168752
	-0.0646267	0.148024	0.0551036	0.0575986	-0.038842	0.00740444			-0.0876722	-0.0809942	0.0241657	0.129995	-0.193791	-0.0168752
	-0.123219	0.125255	0.0285404	0.00447509	-0.05004	-0.019039			-0.0911875	-0.109119	-0.016459	0.124005	-0.192228	-0.0151918
	-0.123219	0.125255	0.0285404	0.00447509	-0.05004	-0.019039			-0.0911875	-0.109119	-0.016459	0.124005	-0.192228	-0.0151918
	-0.104469	0.108291	0.0351028	0.0380679	-0.0320703	0.0360094			-0.084548	-0.101085	0.0101032	0.134942	-0.152905	0.0155767
	-0.104469	0.108291	0.0351028	0.0380679	-0.0320703	0.0360094			-0.084548	-0.101085	0.0101032	0.134942	-0.152905	0.0155767
	-0.154469	0.112756	0.0213531	0.0156725	-0.0177474	0.0453836			-0.147829	-0.127871	-0.00614668	0.0987436	-0.185456	0.0129331
	-0.154469	0.112756	0.0213531	0.0156725	-0.0177474	0.0453836			-0.147829	-0.127871	-0.00614668	0.0987436	-0.185456	0.0129331
	-0.165405	0.0721311	-0.00989691	-0.0356307	-0.0351971	-0.00293281			-0.158766	-0.177422	-0.0186471	0.0937965	-0.172957	0.0256733
	-0.165405	0.0721311	-0.00989691	-0.0356307	-0.0351971	-0.00293281			-0.158766	-0.177422	-0.0186471	0.0937965	-0.172957	0.0256733
	-0.104079	0.0105226	0.00885462	-0.00229759	-0.0237358	0.0230289			-0.113064	-0.21046	-0.0195836	0.107598	-0.160717	0.00836544
	-0.104079	0.0105226	0.00885462	-0.00229759	-0.0237358	0.0230289			-0.113064	-0.21046	-0.0195836	0.107598	-0.160717	0.00836544
	-0.167359	-0.00287026	0.00166658	-0.0304227	-0.0635822	-0.00365349			-0.174001	-0.255995	-0.0620843	0.0753073	-0.221133	-0.0118272
	-0.167359	-0.00287026	0.00166658	-0.0304227	-0.0635822	-0.00365349			-0.174001	-0.255995	-0.0620843	0.0753073	-0.221133	-0.0118272
	-0.164236	-0.0457257	-0.0142712	-0.0567228	-0.0726955	0.0114909			-0.126736	-0.268941	-0.0452096	0.0740052	-0.183373	-0.00701982
	-0.164236	-0.0457257	-0.0142712	-0.0567228	-0.0726955	0.0114909			-0.126736	-0.268941	-0.0452096	0.0740052	-0.183373	-0.00701982
	-0.10525	-0.0287633	0.00447916	-0.00776437	-0.0549864	0.0232692			-0.131423	-0.232779	-0.0498963	0.0950986	-0.176081	-0.00653829
	-0.10525	-0.0287633	0.00447916	-0.00776437	-0.0549864	0.0232692			-0.131423	-0.232779	-0.0498963	0.0950986	-0.176081	-0.00653829
	-0.148219	-0.0251917	-0.00302168	-0.0325049	-0.0823315	-0.0103832			-0.145483	-0.244386	-0.0670842	0.0542137	-0.203684	-0.0115863
	-0.148219	-0.0251917	-0.00302168	-0.0325049	-0.0823315	-0.0103832			-0.145483	-0.244386	-0.0670842	0.0542137	-0.203684	-0.0115863
	-0.134937	-0.0381366	0.00166544	-0.0145364	-0.0578519	0.00427991			-0.0595474	-0.22028	-0.026772	0.112286	-0.184415	-0.00509516
	-0.134937	-0.0381366	0.00166544	-0.0145364	-0.0578519	0.00427991			-0.0595474	-0.22028	-0.026772	0.112286	-0.184415	-0.00509516
	-0.126343	0.0163286	0.0194782	0.0182754	-0.0393621	0.0134126			-0.124783	-0.193049	-0.0564591	0.0930164	-0.202903	-0.0312977
	-0.126343	0.0163286	0.0194782	0.0182754	-0.0393621	0.0134126			-0.124783	-0.193049	-0.0564591	0.0930164	-0.202903	-0.0312977
	-0.136108	0.025255	-0.00114599	-0.0124529	-0.0773838	-0.000768402			-0.0880642	-0.22385	-0.0495843	0.096401	-0.191186	-0.00413532
	-0.136108	0.025255	-0.00114599	-0.0124529	-0.0773838	-0.000768402			-0.0880642	-0.22385	-0.0495843	0.096401	-0.191186	-0.00413532
	-0.0747824	0.0368625	0.0285404	0.00994187	-0.0427482	0.0136547			-0.0880623	-0.184566	-0.016771	0.12088	-0.173477	-0.016154
	-0.0747824	0.0368625	0.0285404	0.00994187	-0.0427482	0.0136547			-0.0880623	-0.184566	-0.016771	0.12088	-0.173477	-0.016154
	-0.135329	0.0448974	0.00572923	-0.00229727	-0.0695713	-0.0195197			-0.127126	-0.181887	-0.0386471	0.0836412	-0.201862	-0.0300961
	-0.135329	0.0448974	0.00572923	-0.00229727	-0.0695713	-0.0195197			-0.127126	-0.181887	-0.0386471	0.0836412	-0.201862	-0.0300961
	-0.121656	0.00472099	-0.000834714	-0.00359935	-0.0739983	-0.00701981			-0.0763435	-0.187245	-0.0373971	0.106296	-0.195092	0.00451876
	-0.121656	0.00472099	-0.000834714	-0.00359935	-0.0739983	-0.00701981			-0.0763435	-0.187245	-0.0373971	0.106296	-0.195092	0.00451876
	-0.0974388	0.0297203	0.00822786	0.0294738	-0.0539463	-0.000768402			-0.0974388	-0.167155	-0.0358349	0.119057	-0.193269	-0.00148998
	-0.0974388	0.0297203	0.00822786	0.0294738	-0.0539463	-0.000768402			-0.0974388	-0.167155	-0.0358349	0.119057	-0.193269	-0.00148998
	-0.118922	0.0417737	-0.017709	-0.0202661	-0.0833716	-0.0163946			-0.121657	-0.189923	-0.0389599	0.0828592	-0.204467	-0.0238464
	-0.118922	0.0417737	-0.017709	-0.0202661	-0.0833716	-0.0163946			-0.121657	-0.189923	-0.0389599	0.0828592	-0.204467	-0.0238464
	-0.117359	-0.00242448	-0.00364691	-0.00724589	-0.0609774	0.0059619			-0.0579853	-0.223404	-0.0308346	0.106036	-0.209414	-0.0151918
	-0.117359	-0.00242448	-0.00364691	-0.00724589	-0.0609774	0.0059619			-0.0579853	-0.223404	-0.0308346	0.106036	-0.209414	-0.0151918
	-0.0790796	0.0136485	-0.00177199	0.0328593	-0.0318109	0.00932733			-0.0958738	-0.195726	-0.0211468	0.0953596	-0.220613	-0.0077408
	-0.0790796	0.0136485	-0.00177199	0.0328593	-0.0318109	0.00932733			-0.0958738	-0.195726	-0.0211468	0.0953596	-0.220613	-0.0077408
	-0.136499	0.010079	-0.0242726	-0.0160982	-0.079466	-0.0303376			-0.132983	-0.211352	-0.058334	0.0700993	-0.211758	-0.0187981
	-0.136499	0.010079	-0.0242726	-0.0160982	-0.079466	-0.0303376			-0.132983	-0.211352	-0.058334	0.0700993	-0.211758	-0.0187981
	-0.0853291	-0.00643972	-0.00302207	0.00395343	-0.0604561	-0.00461479			-0.0896263	-0.209566	-0.00895964	0.109942	-0.205508	-0.0154336
	-0.0853291	-0.00643972	-0.00302207	0.00395343	-0.0604561	-0.00461479			-0.0896263	-0.209566	-0.00895964	0.109942	-0.205508	-0.0154336
	-0.0907984	-0.0109051	-0.00489622	0.0224426	-0.0633209	0.00572068			-0.145485	-0.225637	-0.052084	0.0833811	-0.214623	-0.031538
	-0.0907984	-0.0109051	-0.00489622	0.0224426	-0.0633209	0.00572068			-0.145485	-0.225637	-0.052084	0.0833811	-0.214623	-0.031538
	-0.131031	-0.0131361	-0.00833479	-0.0150571	-0.0752991	-0.0238467			-0.135718	-0.259564	-0.0314587	0.106557	-0.207852	-0.0135095
	-0.131031	-0.0131361	-0.00833479	-0.0150571	-0.0752991	-0.0238467			-0.135718	-0.259564	-0.0314587	0.106557	-0.207852	-0.0135095
	-0.0829849	-0.0167089	0.00697778	0.037807	-0.0578519	0.00572128			-0.109157	-0.223851	-0.0186471	0.126609	-0.186498	-0.0238459
	-0.0829849	-0.0167089	0.00697778	0.037807	-0.0578519	0.00572128			-0.109157	-0.223851	-0.0186471	0.126609	-0.186498	-0.0238459
	-0.124392	-0.00197652	-0.0164593	-0.00932871	-0.0797273	-0.0243274			-0.120874	-0.234565	-0.0377091	0.0750473	-0.215403	-0.0493269
	-0.124392	-0.00197652	-0.0164593	-0.00932871	-0.0797273	-0.0243274			-0.120874	-0.234565	-0.0377091	0.0750473	-0.215403	-0.0493269
	-0.113845	0.00159512	-0.0105221	-0.00464045	-0.0729562	0.000193486			-0.0790787	-0.240816	-0.0348969	0.121401	-0.193008	-0.0125476
	-0.113845	0.00159512	-0.0105221	-0.00464045	-0.0729562	0.000193486			-0.0790787	-0.240816	-0.0348969	0.121401	-0.193008	-0.0125476
	-0.051734	0.0426674	0.0276023	0.0229633	-0.0414455	-0.00629854			-0.11736	-0.222065	-0.0367715	0.118016	-0.196133	-0.0274522
	-0.051734	0.0426674	0.0276023	0.0229633	-0.0414455	-0.00629854			-0.11736	-0.222065	-0.0367715	0.118016	-0.196133	-0.0274522
	-0.104079	0.0123079	0.00760301	-0.0111509	-0.06957	-0.013989			-0.151344	-0.22028	-0.0277085	0.0932758	-0.195353	-0.0356242
	-0.104079	0.0123079	0.00760301	-0.0111509	-0.06957	-0.013989			-0.151344	-0.22028	-0.0277085	0.0932758	-0.195353	-0.0356242
	-0.0775156	-0.0180473	0.00947756	0.0148905	-0.0495187	0.00524062			-0.0822048	-0.218494	-0.0108338	0.117495	-0.163581	-0.0344231
	-0.0775156	-0.0180473	0.00947756	0.0148905	-0.0495187	0.00524062			-0.0822048	-0.218494	-0.0108338	0.117495	-0.163581	-0.0344231
	-0.0591545	0.0368625	0.0022899	0.0427543	-0.0448317	-0.012307			-0.134157	-0.206887	-0.0252087	0.0818168	-0.198216	-0.0459617
	-0.0591545	0.0368625	0.0022899	0.0427543	-0.0448317	-0.012307			-0.134157	-0.206887	-0.0252087	0.0818168	-0.198216	-0.0459617
	-0.0904074	0.0323983	-0.00677153	-0.0062032	-0.0557684	-0.0252881			-0.119705	-0.227424	-0.0373971	0.10161	-0.185455	-0.022403
	-0.0904074	0.0323983	-0.00677153	-0.0062032	-0.0557684	-0.0252881			-0.119705	-0.227424	-0.0373971	0.10161	-0.185455	-0.022403
	-0.0470467	0.0140942	0.00541567	0.0229624	-0.0482166	0.00860519			-0.107594	-0.199297	-0.0277085	0.121922	-0.16879	-0.0236058
	-0.0470467	0.0140942	0.00541567	0.0229624	-0.0482166	0.00860519			-0.107594	-0.199297	-0.0277085	0.121922	-0.16879	-0.0236058
	-0.0615015	0.0185585	0.0144786	0.0164539	-0.055509	0.00764506			-0.12361	-0.219387	-0.0261471	0.108901	-0.184934	-0.0469239
	-0.0615015	0.0185585	0.0144786	0.0164539	-0.055509	0.00764506			-0.12361	-0.219387	-0.0261471	0.108901	-0.184934	-0.0469239
	-0.083374	0.00829264	-0.00739599	-0.00542214	-0.028164	0.0141353			-0.0712643	-0.233226	-0.0120839	0.122442	-0.170352	-0.0209611
	-0.083374	0.00829264	-0.00739599	-0.00542214	-0.028164	0.0141353			-0.0712643	-0.233226	-0.0120839	0.122442	-0.170352	-0.0209611
	-0.0560322	0.0140953	0.0304153	0.038589	-0.0273826	0.0175011			-0.0771255	-0.206888	-0.0358346	0.124005	-0.162019	-0.0260094
	-0.0560322	0.0140953	0.0304153	0.038589	-0.0273826	0.0175011			-0.0771255	-0.206888	-0.0358346	0.124005	-0.162019	-0.0260094
	-0.111501	0.0261487	0.0313533	0.00212969	-0.0687893	0.0114909			-0.136109	-0.227422	-0.0445847	0.10239	-0.182331	-0.036827
	-0.111501	0.0261487	0.0313533	0.00212969	-0.0687893	0.0114909			-0.136109	-0.227422	-0.0445847	0.10239	-0.182331	-0.036827
	-0.0943127	-0.0144757	0.0188533	0.028172	-0.038582	0.0324054			-0.0544701	-0.21537	-0.00114752	0.145359	-0.148737	-0.00485601
	-0.0943127	-0.0144757	0.0188533	0.028172	-0.038582	0.0324054			-0.0544701	-0.21537	-0.00114752	0.145359	-0.148737	-0.00485601
	-0.0657968	0.04088	0.0263526	0.0575995	-0.0109769	0.0292788			-0.107984	-0.191262	-0.0117714	0.11489	-0.172697	-0.0260094
	-0.0657968	0.04088	0.0263526	0.0575995	-0.0109769	0.0292788			-0.107984	-0.191262	-0.0117714	0.11489	-0.172697	-0.0260094
	-0.118531	0.0239166	0.0310405	0.019059	-0.0357165	0.00668199			-0.100562	-0.229208	-0.0192719	0.119317	-0.166707	-0.00605793
	-0.118531	0.0239166	0.0310405	0.019059	-0.0357165	0.00668199			-0.100562	-0.229208	-0.0192719	0.119317	-0.166707	-0.00605793
	-0.0595474	0.0279351	0.0413535	0.0529109	-0.0156645	0.0425002			-0.0478277	-0.194389	0.00416597	0.159161	-0.146654	-0.000287762
	-0.0595474	0.0279351	0.0413535	0.0529109	-0.0156645	0.0425002			-0.0478277	-0.194389	0.00416597	0.159161	-0.146654	-0.000287762
	-0.0962667	0.0654346	0.0276031	0.043797	-0.0294674	0.0350481			-0.100563	-0.160456	-0.0102101	0.115671	-0.184675	-0.0308171
	-0.0962667	0.0654346	0.0276031	0.043797	-0.0294674	0.0350481			-0.100563	-0.160456	-0.0102101	0.115671	-0.184675	-0.0308171
	-0.084157	0.0364168	0.0191661	0.0391097	-0.0292061	0.0290385			-0.0404072	-0.197067	-0.00208441	0.138068	-0.157332	0.00548094
	-0.084157	0.0364168	0.0191661	0.0391097	-0.0292061	0.0290385			-0.0404072	-0.197067	-0.00208441	0.138068	-0.157332	0.00548094
	-0.0392351	0.0395394	0.0488536	0.0758284	-0.00108031	0.0441825			-0.0642347	-0.152424	-0.000834332	0.144057	-0.151863	0.00668228
	-0.0392351	0.0395394	0.0488536	0.0758284	-0.00108031	0.0441825			-0.0642347	-0.152424	-0.000834332	0.144057	-0.151863	0.00668228
	-0.0782986	0.0596308	0.0310405	0.0539527	-0.0221749	0.0239902			-0.0974369	-0.195279	-0.0127095	0.117234	-0.157593	-0.00701894
	-0.0782986	0.0596308	0.0310405	0.0539527	-0.0221749	0.0239902			-0.0974369	-0.195279	-0.0127095	0.117234	-0.157593	-0.00701894
	-0.0736093	0.0453464	0.0532283	0.0513482	-0.00967419	0.0441828			-0.0431404	-0.189922	-0.00427138	0.147703	-0.139101	0.0290387
	-0.0736093	0.0453464	0.0532283	0.0513482	-0.00967419	0.0441828			-0.0431404	-0.189922	-0.00427138	0.147703	-0.139101	0.0290387
	-0.0657987	0.0502565	0.0579151	0.0805154	0.00126255	0.0557211			-0.104467	-0.175189	-0.00739637	0.142495	-0.161238	0.016298
	-0.0657987	0.0502565	0.0579151	0.0805154	0.00126255	0.0557211			-0.104467	-0.175189	-0.00739637	0.142495	-0.161238	0.016298
	-0.0966577	0.0716842	0.0194782	0.0294741	-0.0148825	0.0420202			-0.0970478	-0.194388	-0.0170838	0.132078	-0.141707	0.0105295
	-0.0966577	0.0716842	0.0194782	0.0294741	-0.0148825	0.0420202			-0.0970478	-0.194388	-0.0170838	0.132078	-0.141707	0.0105295
	-0.0673599	0.054275	0.0494781	0.074526	0.000481172	0.073269			-0.0396261	-0.184119	0.0213542	0.160462	-0.123737	0.0333655
	-0.0673599	0.054275	0.0494781	0.074526	0.000481172	0.073269			-0.0396261	-0.184119	0.0213542	0.160462	-0.123737	0.0333655
	-0.068531	0.0819523	0.0485408	0.0784329	0.00412802	0.0662978			-0.0982189	-0.181886	0.024166	0.143797	-0.146655	0.00836573
	-0.068531	0.0819523	0.0485408	0.0784329	0.00412802	0.0662978			-0.0982189	-0.181886	0.024166	0.143797	-0.146655	0.00836573
	-0.0970488	0.0578456	0.0485408	0.0602024	-0.00681126	0.0768736			-0.0615005	-0.163138	0.0257278	0.141193	-0.136759	0.0319221
	-0.0970488	0.0578456	0.0485408	0.0602024	-0.00681126	0.0768736			-0.0615005	-0.163138	0.0257278	0.141193	-0.136759	0.0319221
	-0.0431414	0.0547197	0.0716651	0.106818	0.023658	0.0723071			-0.0447025	-0.137691	0.0444782	0.184422	-0.115925	0.0408162
	-0.0431414	0.0547197	0.0716651	0.106818	0.023658	0.0723071			-0.0447025	-0.137691	0.0444782	0.184422	-0.115925	0.0408162
	-0.0911884	0.0716842	0.066978	0.0719218	0.00985579	0.0420196			-0.0818129	-0.156886	0.0313529	0.148484	-0.125301	0.027355
	-0.0911884	0.0716842	0.066978	0.0719218	0.00985579	0.0420196			-0.0818129	-0.156886	0.0313529	0.148484	-0.125301	0.027355
	-0.0810318	0.0582913	0.0657283	0.101349	0.0161055	0.0800011			-0.0349379	-0.160013	0.0469772	0.197704	-0.107592	0.0485096
	-0.0810318	0.0582913	0.0657283	0.101349	0.0161055	0.0800011			-0.0349379	-0.160013	0.0469772	0.197704	-0.107592	0.0485096
	-0.0267363	0.111416	0.0829158	0.122181	0.0551699	0.0968259			-0.06775	-0.138584	0.020103	0.171141	-0.130508	0.0489902
	-0.0267363	0.111416	0.0829158	0.122181	0.0551699	0.0968259			-0.06775	-0.138584	0.020103	0.171141	-0.130508	0.0489902
	-0.0911884	0.102935	0.0566665	0.0854633	0.0153254	0.0836062			-0.0657978	-0.153315	0.0119792	0.155776	-0.107852	0.0593274
	-0.0911884	0.102935	0.0566665	0.0854633	0.0153254	0.0836062			-0.0657978	-0.153315	0.0119792	0.155776	-0.107852	0.0593274
	-0.0458755	0.0832929	0.0466648	0.115411	0.0468361	0.112453			0.00295449	-0.132333	0.0622905	0.207859	-0.0750397	0.0655777
	-0.0458755	0.0832929	0.0466648	0.115411	0.0468361	0.112453			0.00295449	-0.132333	0.0622905	0.207859	-0.0750397	0.0655777
	-0.051343	0.118559	0.0716651	0.120099	0.0692303	0.110529			-0.0411873	-0.123406	0.0322906	0.170619	-0.111499	0.0581246
	-0.051343	0.118559	0.0716651	0.120099	0.0692303	0.110529			-0.0411873	-0.123406	0.0322906	0.170619	-0.111499	0.0581246
	-0.0712652	0.105614	0.0663532	0.0904113	0.0536078	0.0961067			-0.037672	-0.145727	0.0441669	0.179474	-0.0875392	0.112213
	-0.0712652	0.105614	0.0663532	0.0904113	0.0536078	0.0961067			-0.037672	-0.145727	0.0441669	0.179474	-0.0875392	0.112213
	0.00100041	0.11231	0.0879154	0.141453	0.0872007	0.131923			0.00646878	-0.0854595	0.0672904	0.210203	-0.0643636	0.100914
	0.00100041	0.11231	0.0879154	0.141453	0.0872007	0.131923			0.00646878	-0.0854595	0.0672904	0.210203	-0.0643636	0.100914
	-0.0200939	0.133738	0.0957271	0.128431	0.0697529	0.128317			-0.0329857	-0.101082	0.0407279	0.167756	-0.0810288	0.102597
	-0.0200939	0.133738	0.0957271	0.128431	0.0697529	0.128317			-0.0329857	-0.101082	0.0407279	0.167756	-0.0810288	0.102597
	-0.0247812	0.10606	0.0682281	0.130255	0.0819924	0.160048			0.0244379	-0.118495	0.0663528	0.198223	-0.0555084	0.135288
	-0.0247812	0.10606	0.0682281	0.130255	0.0819924	0.160048			0.0244379	-0.118495	0.0663528	0.198223	-0.0555084	0.135288
	0.0205317	0.128826	0.116353	0.162808	0.122618	0.17976			0.0162335	-0.0693866	0.082291	0.215932	-0.0338937	0.127116
	0.0205317	0.128826	0.116353	0.162808	0.122618	0.17976			0.0162335	-0.0693866	0.082291	0.215932	-0.0338937	0.127116
	-0.021656	0.105166	0.101979	0.128953	0.0861586	0.162212			-0.0157967	-0.0912633	0.0538528	0.190151	-0.0591527	0.133846
	-0.021656	0.105166	0.101979	0.128953	0.0861586	0.162212			-0.0157967	-0.0912633	0.0538528	0.190151	-0.0591527	0.133846
	0.0162335	0.114095	0.109792	0.125828	0.10647	0.187452			0.0322485	-0.0662607	0.0838535	0.234162	-0.0219136	0.173751
	0.0162335	0.114095	0.109792	0.125828	0.10647	0.187452			0.0322485	-0.0662607	0.0838535	0.234162	-0.0219136	0.173751
	0.0330305	0.161864	0.121978	0.179213	0.139804	0.208606			-0.021657	-0.0524243	0.0891654	0.218797	-0.0266032	0.168702
	0.0330305	0.161864	0.121978	0.179213	0.139804	0.208606			-0.021657	-0.0524243	0.0891654	0.218797	-0.0266032	0.168702
	-0.0243912	0.163204	0.111666	0.138588	0.105169	0.202596			-0.00876617	-0.0716187	0.102602	0.22114	-0.022175	0.186009
	-0.0243912	0.163204	0.111666	0.138588	0.105169	0.202596			-0.00876617	-0.0716187	0.102602	0.22114	-0.022175	0.186009
	0.0263891	0.148025	0.137291	0.171401	0.145534	0.253558			0.0549059	-0.0537638	0.135104	0.262286	-0.0042071	0.203557
	0.0263891	0.148025	0.137291	0.171401	0.145534	0.253558			0.0549059	-0.0537638	0.135104	0.262286	-0.0042071	0.203557
	0.0299063	0.194451	0.133228	0.171921	0.149961	0.242501			0.0146713	-0.0403698	0.118228	0.217496	-0.0211329	0.200673
	0.0299063	0.194451	0.133228	0.171921	0.149961	0.242501			0.0146713	-0.0403698	0.118228	0.217496	-0.0211329	0.200673
	0.0267801	0.177042	0.128853	0.16437	0.176263	0.25524			0.0525618	-0.0693866	0.133853	0.235724	0.0220965	0.219184
	0.0267801	0.177042	0.128853	0.16437	0.176263	0.25524			0.0525618	-0.0693866	0.133853	0.235724	0.0220965	0.219184
	0.0748272	0.202041	0.171353	0.18989	0.21871	0.291779			0.0818596	-0.0292091	0.137291	0.269057	0.0431905	0.241298
	0.0748272	0.202041	0.171353	0.18989	0.21871	0.291779			0.0818596	-0.0292091	0.137291	0.269057	0.0431905	0.241298
	0.0365458	0.235076	0.175103	0.182077	0.19345	0.292259			0.072875	-0.0234053	0.113853	0.230255	0.0111572	0.244904
	0.0365458	0.235076	0.175103	0.182077	0.19345	0.292259			0.072875	-0.0234053	0.113853	0.230255	0.0111572	0.244904
	0.0435762	0.214988	0.175728	0.180775	0.202043	0.309808			0.118186	-0.0479589	0.140728	0.254213	0.0549086	0.277835
	0.0435762	0.214988	0.175728	0.180775	0.202043	0.309808			0.118186	-0.0479589	0.140728	0.254213	0.0549086	0.277835
	0.0783444	0.242667	0.202603	0.234943	0.224441	0.338654			0.0752182	0.00829046	0.133853	0.245099	0.0465748	0.295626
	0.0783444	0.242667	0.202603	0.234943	0.224441	0.338654			0.0752182	0.00829046	0.133853	0.245099	0.0465748	0.295626
	0.072485	0.240435	0.187603	0.197703	0.195013	0.325913			0.0670157	0.00650518	0.14604	0.268276	0.0533452	0.315817
	0.072485	0.240435	0.187603	0.197703	0.195013	0.325913			0.0670157	0.00650518	0.14604	0.268276	0.0533452	0.315817
	0.0869389	0.231059	0.194166	0.229995	0.246315	0.389134			0.133031	0.0507012	0.172603	0.306297	0.0900655	0.348269
	0.0869389	0.231059	0.194166	0.229995	0.246315	0.389134			0.133031	0.0507012	0.172603	0.306297	0.0900655	0.348269
	0.0943585	0.273471	0.219478	0.240932	0.26194	0.408364			0.0927973	0.0422216	0.16104	0.284943	0.0856373	0.333365
	0.0943585	0.273471	0.219478	0.240932	0.26194	0.408364			0.0927973	0.0422216	0.16104	0.284943	0.0856373	0.333365
	0.0806885	0.261863	0.214791	0.214891	0.283034	0.395145			0.117016	0.032844	0.160416	0.293797	0.0989188	0.369904
	0.0806885	0.261863	0.214791	0.214891	0.283034	0.395145			0.117016	0.032844	0.160416	0.293797	0.0989188	0.369904
	0.127563	0.282845	0.238853	0.270359	0.29345	0.433365			0.141624	0.0515938	0.185103	0.33937	0.137199	0.369424
	0.127563	0.282845	0.238853	0.270359	0.29345	0.433365			0.141624	0.0515938	0.185103	0.33937	0.137199	0.369424
	0.0970936	0.305165	0.216979	0.253953	0.28772	0.422548			0.113108	0.0542739	0.179166	0.304994	0.13043	0.371106
	0.0970936	0.305165	0.216979	0.253953	0.28772	0.422548			0.113108	0.0542739	0.179166	0.304994	0.13043	0.371106
	0.113109	0.290433	0.234479	0.252911	0.310116	0.465577			0.139671	0.0770411	0.190103	0.325307	0.165064	0.413414
	0.113109	0.290433	0.234479	0.252911	0.310116	0.465577			0.139671	0.0770411	0.190103	0.325307	0.165064	0.413414
	0.180297	0.309631	0.256041	0.30213	0.348397	0.488174			0.133421	0.127934	0.214165	0.351609	0.177565	0.44274
	0.180297	0.309631	0.256041	0.30213	0.348397	0.488174			0.133421	0.127934	0.214165	0.351609	0.177565	0.44274
	0.149439	0.31097	0.247603	0.27635	0.322356	0.501874			0.130686	0.108738	0.179165	0.331817	0.189283	0.437693
	0.149439	0.31097	0.247603	0.27635	0.322356	0.501874			0.130686	0.108738	0.179165	0.331817	0.189283	0.437693
	0.166624	0.327487	0.266978	0.30187	0.341888	0.546586			0.159204	0.132398	0.236666	0.357338	0.211679	0.477355
	0.166624	0.327487	0.266978	0.30187	0.341888	0.546586			0.159204	0.132398	0.236666	0.357338	0.211679	0.477355
	0.196703	0.375253	0.277603	0.320879	0.380169	0.577116			0.12639	0.135523	0.209165	0.355255	0.192929	0.4925
	0.196703	0.375253	0.277603	0.320879	0.380169	0.577116			0.12639	0.135523	0.209165	0.355255	0.192929	0.4925
	0.172873	0.364542	0.272603	0.280776	0.365847	0.564856			0.154515	0.126149	0.231979	0.366192	0.232513	0.492019
	0.172873	0.364542	0.272603	0.280776	0.365847	0.564856			0.154515	0.126149	0.231979	0.366192	0.232513	0.492019
	0.243968	0.374363	0.304165	0.320619	0.407513	0.601394			0.193187	0.141773	0.266978	0.410724	0.247617	0.522307
	0.243968	0.374363	0.304165	0.320619	0.407513	0.601394			0.193187	0.141773	0.266978	0.410724	0.247617	0.522307
	0.192797	0.386864	0.301978	0.331037	0.402824	0.623509			0.150608	0.156951	0.242915	0.377129	0.241887	0.528077
	0.192797	0.386864	0.301978	0.331037	0.402824	0.623509			0.150608	0.156951	0.242915	0.377129	0.241887	0.528077
	0.200611	0.372131	0.312915	0.334161	0.417669	0.626633			0.191236	0.13954	0.25604	0.409421	0.258555	0.583606
	0.200611	0.372131	0.312915	0.334161	0.417669	0.626633			0.191236	0.13954	0.25604	0.409421	0.258555	0.583606
	0.273267	0.41588	0.34854	0.366713	0.46845	0.666539			0.195922	0.179274	0.277916	0.43963	0.303605	0.60572
	0.273267	0.41588	0.34854	0.366713	0.46845	0.666539			0.195922	0.179274	0.277916	0.43963	0.303605	0.60572
	0.235766	0.439988	0.330103	0.348224	0.453346	0.66173			0.172873	0.176148	0.28604	0.412026	0.306731	0.605961
	0.235766	0.439988	0.330103	0.348224	0.453346	0.66173			0.172873	0.176148	0.28604	0.412026	0.306731	0.605961
	0.275609	0.420792	0.333227	0.36437	0.498398	0.695625			0.223655	0.175702	0.306353	0.466973	0.341106	0.632164
	0.275609	0.420792	0.333227	0.36437	0.498398	0.695625			0.223655	0.175702	0.306353	0.466973	0.341106	0.632164
	0.299047	0.44222	0.355728	0.420098	0.538763	0.714374			0.199046	0.192666	0.294791	0.45239	0.321575	0.630479
	0.299047	0.44222	0.355728	0.420098	0.538763	0.714374			0.199046	0.192666	0.294791	0.45239	0.321575	0.630479
	0.278343	0.427041	0.334166	0.393796	0.53095	0.734807			0.190454	0.196685	0.318541	0.457859	0.356211	0.669904
	0.278343	0.427041	0.334166	0.393796	0.53095	0.734807			0.190454	0.196685	0.318541	0.457859	0.356211	0.669904
	0.317799	0.430167	0.382604	0.411505	0.535117	0.784087			0.24514	0.232397	0.361041	0.5089	0.383814	0.672548
	0.317799	0.430167	0.382604	0.411505	0.535117	0.784087			0.24514	0.232397	0.361041	0.5089	0.383814	0.672548
	0.298656	0.480165	0.384478	0.432599	0.565066	0.802114			0.20061	0.249363	0.34104	0.479213	0.352304	0.676875
	0.298656	0.480165	0.384478	0.432599	0.565066	0.802114			0.20061	0.249363	0.34104	0.479213	0.352304	0.676875
	0.281858	0.46722	0.375415	0.413328	0.552304	0.804278			0.226001	0.227933	0.34229	0.50864	0.391366	0.72327
	0.281858	0.46722	0.375415	0.413328	0.552304	0.804278			0.226001	0.227933	0.34229	0.50864	0.391366	0.72327
	0.348266	0.491327	0.411978	0.456036	0.611158	0.847308			0.249827	0.277488	0.366978	0.516453	0.420013	0.751875
	0.348266	0.491327	0.411978	0.456036	0.611158	0.847308			0.249827	0.277488	0.366978	0.516453	0.420013	0.751875
	0.333032	0.511415	0.415416	0.450827	0.599699	0.851635			0.234593	0.265435	0.351666	0.485464	0.416626	0.76221
	0.333032	0.511415	0.415416	0.450827	0.599699	0.851635			0.234593	0.265435	0.351666	0.485464	0.416626	0.76221
	0.343578	0.510077	0.426354	0.469057	0.618711	0.917018			0.289672	0.291327	0.386353	0.521401	0.460898	0.789856
	0.343578	0.510077	0.426354	0.469057	0.618711	0.917018			0.289672	0.291327	0.386353	0.521401	0.460898	0.789856
	0.388499	0.54356	0.449478	0.498224	0.6622	0.922307			0.268187	0.323024	0.400103	0.528953	0.464544	0.832403
	0.388499	0.54356	0.449478	0.498224	0.6622	0.922307			0.268187	0.323024	0.400103	0.528953	0.464544	0.832403
	0.345922	0.564542	0.41979	0.462807	0.654386	0.921827			0.254514	0.294898	0.368228	0.540411	0.484856	0.846586
	0.345922	0.564542	0.41979	0.462807	0.654386	0.921827			0.254514	0.294898	0.368228	0.540411	0.484856	0.846586
	0.416235	0.540881	0.456353	0.503171	0.691627	0.988653			0.3135	0.335076	0.432603	0.570098	0.529128	0.868943
	0.416235	0.540881	0.456353	0.503171	0.691627	0.988653			0.3135	0.335076	0.432603	0.570098	0.529128	0.868943
	0.400608	0.605612	0.461666	0.5339	0.679647	0.985048			0.27014	0.360078	0.413228	0.563849	0.50699	0.878077
	0.400608	0.605612	0.461666	0.5339	0.679647	0.985048			0.27014	0.360078	0.413228	0.563849	0.50699	0.878077
	0.379906	0.594453	0.460415	0.50864	0.681209	1.00981			0.283813	0.338202	0.41604	0.579734	0.527305	0.919903
	0.379906	0.594453	0.460415	0.50864	0.681209	1.00981			0.283813	0.338202	0.41604	0.579734	0.527305	0.919903
	0.461938	0.606059	0.503228	0.562546	0.727044	1.05332			0.333032	0.363201	0.441978	0.629734	0.579908	0.939855
	0.461938	0.606059	0.503228	0.562546	0.727044	1.05332			0.333032	0.363201	0.441978	0.629734	0.579908	0.939855
	0.426781	0.635076	0.476978	0.555255	0.71819	1.06462			0.316626	0.363202	0.434166	0.596921	0.560898	0.936249
	0.426781	0.635076	0.476978	0.555255	0.71819	1.06462			0.316626	0.363202	0.434166	0.596921	0.560898	0.936249
	0.406467	0.642219	0.500728	0.549786	0.73121	1.10404			0.367015	0.379273	0.466665	0.628952	0.585378	0.993942
	0.406467	0.642219	0.500728	0.549786	0.73121	1.10404			0.367015	0.379273	0.466665	0.628952	0.585378	0.993942
	0.450609	0.653828	0.512291	0.607859	0.777044	1.12327			0.338891	0.394007	0.464165	0.630255	0.619752	1.0062
	0.450609	0.653828	0.512291	0.607859	0.777044	1.12327			0.338891	0.394007	0.464165	0.630255	0.619752	1.0062
	0.414671	0.675257	0.520728	0.572442	0.772616	1.15139			0.329515	0.368112	0.459791	0.625307	0.635378	1.02062
	0.414671	0.675257	0.520728	0.572442	0.772616	1.15139			0.329515	0.368112	0.459791	0.625307	0.635378	1.02062
	0.484984	0.664987	0.545415	0.603953	0.804909	1.17086			0.428345	0.402041	0.50729	0.667495	0.689023	1.05428
	0.484984	0.664987	0.545415	0.603953	0.804909	1.17086			0.428345	0.402041	0.50729	0.667495	0.689023	1.05428
	0.498656	0.715881	0.547291	0.644577	0.833294	1.20764			0.394359	0.421239	0.500103	0.649265	0.671055	1.05596
	0.498656	0.715881	0.547291	0.644577	0.833294	1.20764			0.394359	0.421239	0.500103	0.649265	0.671055	1.05596
	0.476391	0.683292	0.558853	0.622703	0.844752	1.21582			0.406075	0.417218	0.507291	0.668015	0.700742	1.105
	0.476391	0.683292	0.558853	0.622703	0.844752	1.21582			0.406075	0.417218	0.507291	0.668015	0.700742	1.105
	0.531077	0.70606	0.586353	0.65291	0.854388	1.26582			0.454123	0.453382	0.536666	0.704473	0.735117	1.14514
	0.531077	0.70606	0.586353	0.65291	0.854388	1.26582			0.454123	0.453382	0.536666	0.704473	0.735117	1.14514
	0.524827	0.749362	0.586353	0.652651	0.881731	1.25788			0.410375	0.468559	0.516978	0.687807	0.716106	1.1401
	0.524827	0.749362	0.586353	0.652651	0.881731	1.25788			0.410375	0.468559	0.516978	0.687807	0.716106	1.1401
	0.518579	0.730614	0.583541	0.653692	0.888763	1.30115			0.449046	0.477934	0.55479	0.712807	0.756991	1.16942
	0.518579	0.730614	0.583541	0.653692	0.888763	1.30115			0.449046	0.477934	0.55479	0.712807	0.756991	1.16942
	0.605689	0.764542	0.614166	0.715932	0.936159	1.33385			0.459594	0.482397	0.56854	0.75265	0.774961	1.21654
	0.605689	0.764542	0.614166	0.715932	0.936159	1.33385			0.459594	0.482397	0.56854	0.75265	0.774961	1.21654
	0.576	0.794453	0.620103	0.675046	0.923919	1.34995			0.433032	0.49088	0.554478	0.71437	0.79267	1.20091
	0.576	0.794453	0.620103	0.675046	0.923919	1.34995			0.433032	0.49088	0.554478	0.71437	0.79267	1.20091
	0.593578	0.768114	0.63729	0.688588	0.959076	1.39322			0.483421	0.49088	0.571978	0.763849	0.83772	1.26197
	0.593578	0.768114	0.63729	0.688588	0.959076	1.39322			0.483421	0.49088	0.571978	0.763849	0.83772	1.26197
	0.64436	0.808291	0.675103	0.734161	1.00256	1.40091			0.459204	0.536416	0.576041	0.772442	0.832514	1.27231
	0.64436	0.808291	0.675103	0.734161	1.00256	1.40091			0.459204	0.536416	0.576041	0.772442	0.832514	1.27231
	0.613111	0.814987	0.651978	0.704995	0.983034	1.39995			0.484593	0.555168	0.601041	0.761766	0.839543	1.30764
	0.613111	0.814987	0.651978	0.704995	0.983034	1.39995			0.484593	0.555168	0.601041	0.761766	0.839543	1.30764
	0.673656	0.79981	0.676041	0.763588	1.01689	1.45332			0.539282	0.552488	0.64354	0.809942	0.894752	1.32663
	0.673656	0.79981	0.676041	0.763588	1.01689	1.45332			0.539282	0.552488	0.64354	0.809942	0.894752	1.32663
	0.628734	0.848916	0.682603	0.760464	1.04241	1.49442			0.503735	0.570793	0.634165	0.80239	0.873398	1.3276
	0.628734	0.848916	0.682603	0.760464	1.04241	1.49442			0.503735	0.570793	0.634165	0.80239	0.873398	1.3276
	0.615452	0.854274	0.676978	0.764369	1.05178	1.51221			0.555686	0.567219	0.632916	0.811765	0.910377	1.36197
	0.615452	0.854274	0.676978	0.764369	1.05178	1.51221			0.555686	0.567219	0.632916	0.811765	0.910377	1.36197
	0.714282	0.867219	0.722916	0.805515	1.10908	1.55308			0.587327	0.598916	0.66979	0.845359	0.973919	1.40163
	0.714282	0.867219	0.722916	0.805515	1.10908	1.55308			0.587327	0.598916	0.66979	0.845359	0.973919	1.40163
	0.676391	0.89847	0.720728	0.782859	1.0846	1.56894			0.530297	0.601149	0.663229	0.824265	0.978345	1.3949
	0.676391	0.89847	0.720728	0.782859	1.0846	1.56894			0.530297	0.601149	0.663229	0.824265	0.978345	1.3949
	0.688499	0.876595	0.740728	0.799005	1.14059	1.61365			0.593967	0.606952	0.702291	0.882599	1.00751	1.44322
	0.688499	0.876595	0.740728	0.799005	1.14059	1.61365			0.593967	0.606952	0.702291	0.882599	1.00751	1.44322
	0.727953	0.938203	0.769478	0.853692	1.16324	1.62255			0.577563	0.649365	0.704478	0.888848	1.01845	1.47736
	0.727953	0.938203	0.769478	0.853692	1.16324	1.62255			0.577563	0.649365	0.704478	0.888848	1.01845	1.47736
	0.677953	0.969453	0.764477	0.815931	1.176	1.62014			0.574436	0.622577	0.704478	0.870359	1.04319	1.48312
	0.677953	0.969453	0.764477	0.815931	1.176	1.62014			0.574436	0.622577	0.704478	0.870359	1.04319	1.48312
	0.746701	0.942668	0.780728	0.849525	1.19006	1.6788			0.647485	0.652935	0.73104	0.935463	1.08251	1.54514
	0.746701	0.942668	0.780728	0.849525	1.19006	1.6788			0.647485	0.652935	0.73104	0.935463	1.08251	1.54514
	0.75725	0.991774	0.79729	0.868796	1.22392	1.69418			0.583422	0.682846	0.735102	0.914369	1.0747	1.53168
	0.75725	0.991774	0.79729	0.868796	1.22392	1.69418			0.583422	0.682846	0.735102	0.914369	1.0747	1.53168
	0.72561	0.985968	0.800415	0.850567	1.22236	1.71125			0.610766	0.670345	0.760728	0.927651	1.11246	1.58024
	0.72561	0.985968	0.800415	0.850567	1.22236	1.71125			0.610766	0.670345	0.760728	0.927651	1.11246	1.58024
	0.791235	0.996238	0.833853	0.894317	1.27496	1.7574			0.645921	0.711417	0.777915	0.965411	1.15517	1.59923
	0.791235	0.996238	0.833853	0.894317	1.27496	1.7574			0.645921	0.711417	0.777915	0.965411	1.15517	1.59923
	0.774437	1.01365	0.82854	0.891192	1.29345	1.78625			0.600608	0.692218	0.760103	0.940151	1.1523	1.59274
	0.774437	1.01365	0.82854	0.891192	1.29345	1.78625			0.600608	0.692218	0.760103	0.940151	1.1523	1.59274
	0.774047	1.0199	0.842916	0.919057	1.31663	1.79875			0.677954	0.71588	0.778228	0.979734	1.18642	1.62759
	0.774047	1.0199	0.842916	0.919057	1.31663	1.79875			0.677954	0.71588	0.778228	0.979734	1.18642	1.62759
	0.834595	1.04668	0.861666	0.953431	1.36767	1.8187			0.662328	0.762754	0.80479	1.01046	1.22079	1.65668
	0.834595	1.04668	0.861666	0.953431	1.36767	1.8187			0.662328	0.762754	0.80479	1.01046	1.22079	1.65668
	0.795142	1.05784	0.863228	0.932077	1.35725	1.82471			0.656467	0.759631	0.794478	0.990151	1.22236	1.66774
	0.795142	1.05784	0.863228	0.932077	1.35725	1.82471			0.656467	0.759631	0.794478	0.990151	1.22236	1.66774
	0.81389	1.05606	0.876978	0.969838	1.39866	1.9151			0.724437	0.772578	0.828541	1.03416	1.26793	1.72135
	0.81389	1.05606	0.876978	0.969838	1.39866	1.9151			0.724437	0.772578	0.828541	1.03416	1.26793	1.72135
	0.850217	1.11588	0.892916	0.991453	1.42522	1.92399			0.672484	0.811416	0.844791	1.04458	1.26272	1.72687
	0.850217	1.11588	0.892916	0.991453	1.42522	1.92399			0.672484	0.811416	0.844791	1.04458	1.26272	1.72687
	0.821701	1.10695	0.87854	0.968536	1.40569	1.92062			0.690844	0.794899	0.845728	1.02817	1.29189	1.7437
	0.821701	1.10695	0.87854	0.968536	1.40569	1.92062			0.690844	0.794899	0.845728	1.02817	1.29189	1.7437
	0.897094	1.1266	0.919166	1.00786	1.45178	1.97663			0.750217	0.841328	0.877603	1.08989	1.35152	1.77904
	0.897094	1.1266	0.919166	1.00786	1.45178	1.97663			0.750217	0.841328	0.877603	1.08989	1.35152	1.77904
	0.874436	1.14445	0.932915	1.02374	1.48538	2.00212			0.723266	0.837757	0.867291	1.06645	1.32782	1.78433
	0.874436	1.14445	0.932915	1.02374	1.48538	2.00212			0.723266	0.837757	0.867291	1.06645	1.32782	1.78433
	0.872095	1.14758	0.917603	1.02505	1.50517	2.01317			0.756077	0.817667	0.891353	1.08572	1.36454	1.82375
	0.872095	1.14758	0.917603	1.02505	1.50517	2.01317			0.756077	0.817667	0.891353	1.08572	1.36454	1.82375
	0.946703	1.17303	0.967603	1.07661	1.55986	2.05091			0.774827	0.865881	0.90604	1.11385	1.40881	1.85861
	0.946703	1.17303	0.967603	1.07661	1.55986	2.05091			0.774827	0.865881	0.90604	1.11385	1.40881	1.85861
	0.902951	1.21231	0.986665	1.05473	1.54736	2.06149			0.751781	0.845791	0.904478	1.10343	1.40725	1.88601
	0.902951	1.21231	0.986665	1.05473	1.54736	2.06149			0.751781	0.845791	0.904478	1.10343	1.40725	1.88601
	0.933812	1.21186	0.98479	1.07661	1.57418	2.11582			0.799047	0.852933	0.947291	1.14822	1.45048	1.91678
	0.933812	1.21186	0.98479	1.07661	1.57418	2.11582			0.799047	0.852933	0.947291	1.14822	1.45048	1.91678
	0.970531	1.24713	1.02323	1.1227	1.63121	2.13721			0.792405	0.904274	0.952915	1.15734	1.44892	1.91389
	0.970531	1.24713	1.02323	1.1227	1.63121	2.13721			0.792405	0.904274	0.952915	1.15734	1.44892	1.91389
	0.95178	1.24892	0.994791	1.08104	1.6148	2.14827			0.794357	0.889541	0.957915	1.16072	1.48381	1.94058
	0.95178	1.24892	0.994791	1.08104	1.6148	2.14827			0.794357	0.889541	0.957915	1.16072	1.48381	1.94058
	1.01194	1.27347	1.04104	1.13989	1.65517	2.20548			0.84514	0.933738	1.00104	1.20395	1.55334	1.9949
	1.01194	1.27347	1.04104	1.13989	1.65517	2.20548			0.84514	0.933738	1.00104	1.20395	1.55334	1.9949
	0.988892	1.33552	1.0301	1.15005	1.69189	2.23721			0.814672	0.919452	0.986353	1.18677	1.53303	1.99899
	0.988892	1.33552	1.0301	1.15005	1.69189	2.23721			0.814672	0.919452	0.986353	1.18677	1.53303	1.99899
	0.978343	1.30918	1.04573	1.15135	1.6984	2.2413			0.834984	0.919899	1.00698	1.21177	1.56012	2.04154
	0.978343	1.30918	1.04573	1.15135	1.6984	2.2413			0.834984	0.919899	1.00698	1.21177	1.56012	2.04154
	1.04397	1.29758	1.08323	1.20343	1.72626	2.26582			0.872875	0.962756	1.02542	1.25161	1.6273	2.04466
	1.04397	1.29758	1.08323	1.20343	1.72626	2.26582			0.872875	0.962756	1.02542	1.25161	1.6273	2.04466
	0.986937	1.35383	1.05354	1.18156	1.73199	2.27183			0.817016	0.954719	1.04073	1.2227	1.59996	2.05187
	0.986937	1.35383	1.05354	1.18156	1.73199	2.27183			0.817016	0.954719	1.04073	1.2227	1.59996	2.05187
	1.00139	1.36945	1.0901	1.18703	1.77574	2.32038			0.89436	0.985076	1.0551	1.26932	1.6372	2.1175
	1.00139	1.36945	1.0901	1.18703	1.77574	2.32038			0.89436	0.985076	1.0551	1.26932	1.6372	2.1175
	1.08342	1.39713	1.11854	1.23807	1.81506	2.33457			0.853735	1.00606	1.07167	1.27088	1.65543	2.11005
	1.08342	1.39713	1.11854	1.23807	1.81506	2.33457			0.853735	1.00606	1.07167	1.27088	1.65543	2.11005
	1.02717	1.42302	1.11792	1.21359	1.79345	2.35861			0.870922	0.973023	1.07698	1.26541	1.67548	2.13817
	1.02717	1.42302	1.11792	1.21359	1.79345	2.35861			0.870922	0.973023	1.07698	1.26541	1.67548	2.13817
	1.11038	1.41142	1.13917	1.24562	1.84241	2.39779			0.929125	0.998469	1.0976	1.32453	1.73121	2.17952
	1.11038	1.41142	1.13917	1.24562	1.84241	2.39779			0.929125	0.998469	1.0976	1.32453	1.73121	2.17952
	1.10412	1.46499	1.1376	1.27505	1.89605	2.41966			0.905687	1.02838	1.07979	1.30708	1.72105	2.17062
	1.10412	1.46499	1.1376	1.27505	1.89605	2.41966			0.905687	1.02838	1.07979	1.30708	1.72105	2.17062
	1.07248	1.4132	1.13323	1.2477	1.8971	2.43433			0.945139	1.01945	1.10823	1.31593	1.76142	2.21846
	1.07248	1.4132	1.13323	1.2477	1.8971	2.43433			0.945139	1.01945	1.10823	1.31593	1.76142	2.21846
	1.16311	1.4199	1.19417	1.29692	1.94657	2.48721			0.997483	1.05204	1.14135	1.36775	1.82131	2.24875
	1.16311	1.4199	1.19417	1.29692	1.94657	2.48721			0.997483	1.05204	1.14135	1.36775	1.82131	2.24875
	1.12209	1.46588	1.18229	1.29432	1.94449	2.50115			0.946312	1.06231	1.13698	1.32713	1.81064	2.24803
	1.12209	1.46588	1.18229	1.29432	1.94449	2.50115			0.946312	1.06231	1.13698	1.32713	1.81064	2.24803
	1.15139	1.47615	1.1851	1.28598	1.97053	2.54274			0.990843	1.06856	1.14917	1.36723	1.82913	2.30644
	1.15139	1.47615	1.1851	1.28598	1.97053	2.54274			0.990843	1.06856	1.14917	1.36723	1.82913	2.30644
	1.19202	1.49758	1.23948	1.35213	2.01298	2.58144			1.02092	1.13329	1.16229	1.39406	1.87574	2.31293
	1.19202	1.49758	1.23948	1.35213	2.01298	2.58144			1.02092	1.13329	1.16229	1.39406	1.87574	2.31293
	1.14788	1.50428	1.23667	1.34223	2.01194	2.56822			1.00569	1.09802	1.15135	1.374	1.86585	2.32255
	1.14788	1.50428	1.23667	1.34223	2.01194	2.56822			1.00569	1.09802	1.15135	1.374	1.86585	2.32255
	1.16662	1.48642	1.24135	1.36671	2.04345	2.62519			1.03264	1.12481	1.18854	1.43572	1.90595	2.35885
	1.16662	1.48642	1.24135	1.36671	2.04345	2.62519			1.03264	1.12481	1.18854	1.43572	1.90595	2.35885
	1.19006	1.5324	1.2726	1.39666	2.09605	2.63048			1.00491	1.13285	1.19198	1.43416	1.90543	2.37567
	1.19006	1.5324	1.2726	1.39666	2.09605	2.63048			1.00491	1.13285	1.19198	1.43416	1.90543	2.37567
	1.17327	1.52347	1.26823	1.35161	2.10022	2.64346			1.03381	1.11677	1.21042	1.43911	1.94475	2.4062
	1.17327	1.52347	1.26823	1.35161	2.10022	2.64346			1.03381	1.11677	1.21042	1.43911	1.94475	2.4062
	1.2174	1.55115	1.3051	1.41437	2.12913	2.70139			1.06858	1.14401	1.24104	1.48286	1.97236	2.43168
	1.2174	1.55115	1.3051	1.41437	2.12913	2.70139			1.06858	1.14401	1.24104	1.48286	1.97236	2.43168
	1.21623	1.57436	1.29167	1.41828	2.16142	2.72231			1.02405	1.15695	1.25073	1.45838	1.98251	2.42423
	1.21623	1.57436	1.29167	1.41828	2.16142	2.72231			1.02405	1.15695	1.25073	1.45838	1.98251	2.42423
	1.23537	1.5382	1.29073	1.39874	2.16949	2.74394			1.06858	1.15026	1.26479	1.48572	2.02418	2.46029
	1.23537	1.5382	1.29073	1.39874	2.16949	2.74394			1.06858	1.15026	1.26479	1.48572	2.02418	2.46029
	1.29631	1.56052	1.34792	1.45864	2.21116	2.76942			1.08733	1.17659	1.28135	1.52062	2.06584	2.48601
	1.29631	1.56052	1.34792	1.45864	2.21116	2.76942			1.08733	1.17659	1.28135	1.52062	2.06584	2.48601
	1.24084	1.61052	1.34323	1.43182	2.21767	2.77423			1.06819	1.17615	1.28229	1.49067	2.06558	2.50284
	1.24084	1.61052	1.34323	1.43182	2.21767	2.77423			1.06819	1.17615	1.28229	1.49067	2.06558	2.50284
	1.27952	1.57704	1.35792	1.4589	2.23928	2.82567			1.13537	1.18195	1.32417	1.54874	2.10074	2.55043
	1.27952	1.57704	1.35792	1.4589	2.23928	2.82567			1.13537	1.18195	1.32417	1.54874	2.10074	2.55043
	1.29748	1.64267	1.39385	1.49432	2.29241	2.84009			1.10178	1.20919	1.31167	1.55343	2.10517	2.56365
	1.29748	1.64267	1.39385	1.49432	2.29241	2.84009			1.10178	1.20919	1.31167	1.55343	2.10517	2.56365
	1.28264	1.63195	1.38417	1.4688	2.26975	2.83841			1.11194	1.19892	1.30167	1.549	2.13407	2.5913
	1.28264	1.63195	1.38417	1.4688	2.26975	2.83841			1.11194	1.19892	1.30167	1.549	2.13407	2.5913
	1.31584	1.63954	1.42104	1.51463	2.30126	2.90716			1.17561	1.2132	1.35698	1.60317	2.18199	2.62567
	1.31584	1.63954	1.42104	1.51463	2.30126	2.90716			1.17561	1.2132	1.35698	1.60317	2.18199	2.62567
	1.33772	1.67124	1.42385	1.52348	2.34423	2.91894			1.14397	1.25026	1.34792	1.56906	2.16819	2.63264
	1.33772	1.67124	1.42385	1.52348	2.34423	2.91894			1.14397	1.25026	1.34792	1.56906	2.16819	2.63264
	1.3092	1.66945	1.41229	1.5076	2.36168	2.92399			1.17444	1.23463	1.36542	1.60161	2.21506	2.66702
	1.3092	1.66945	1.41229	1.5076	2.36168	2.92399			1.17444	1.23463	1.36542	1.60161	2.21506	2.66702
	1.36702	1.68195	1.45916	1.54953	2.40829	2.99322			1.201	1.28686	1.38823	1.65265	2.25959	2.68649
	1.36702	1.68195	1.45916	1.54953	2.40829	2.99322			1.201	1.28686	1.38823	1.65265	2.25959	2.68649
	1.34905	1.71588	1.4601	1.54796	2.3997	2.99394			1.14944	1.27972	1.37917	1.59692	2.26012	2.68457
	1.34905	1.71588	1.4601	1.54796	2.3997	2.99394			1.14944	1.27972	1.37917	1.59692	2.26012	2.68457
	1.37873	1.70159	1.45823	1.55109	2.42991	3.0199			1.20725	1.26499	1.41948	1.63937	2.28772	2.75356
	1.37873	1.70159	1.45823	1.55109	2.42991	3.0199			1.20725	1.26499	1.41948	1.63937	2.28772	2.75356
	1.42756	1.70963	1.48135	1.60343	2.46272	3.06149			1.21584	1.30784	1.42542	1.64874	2.31793	2.76365
	1.42756	1.70963	1.48135	1.60343	2.46272	3.06149			1.21584	1.30784	1.42542	1.64874	2.31793	2.76365
	1.37365	1.73731	1.49667	1.57557	2.46168	3.06678			1.19788	1.28061	1.41854	1.65109	2.31532	2.78216
	1.37365	1.73731	1.49667	1.57557	2.46168	3.06678			1.19788	1.28061	1.41854	1.65109	2.31532	2.78216
	1.42678	1.74222	1.51135	1.60682	2.49735	3.10259			1.26936	1.29892	1.45667	1.69119	2.35022	2.80284
	1.42678	1.74222	1.51135	1.60682	2.49735	3.10259			1.26936	1.29892	1.45667	1.69119	2.35022	2.80284
	1.4424	1.77079	1.52135	1.62244	2.53954	3.11245			1.23616	1.31588	1.4551	1.67192	2.34449	2.81173
	1.4424	1.77079	1.52135	1.62244	2.53954	3.11245			1.23616	1.31588	1.4551	1.67192	2.34449	2.81173
	1.4092	1.75517	1.52385	1.60031	2.53902	3.12495			1.24866	1.28329	1.4526	1.69562	2.37939	2.86606
	1.4092	1.75517	1.52385	1.60031	2.53902	3.12495			1.24866	1.28329	1.4526	1.69562	2.37939	2.86606
	1.4678	1.75472	1.57698	1.67557	2.58928	3.18264			1.2928	1.35115	1.50354	1.74119	2.4234	2.88697
	1.4678	1.75472	1.57698	1.67557	2.58928	3.18264			1.2928	1.35115	1.50354	1.74119	2.4234	2.88697
	1.45803	1.8132	1.56823	1.67635	2.59605	3.20284			1.25647	1.35695	1.48635	1.69301	2.40387	2.87519
	1.45803	1.8132	1.56823	1.67635	2.59605	3.20284			1.25647	1.35695	1.48635	1.69301	2.40387	2.87519
	1.46662	1.79177	1.57073	1.66281	2.61611	3.21918			1.30842	1.34936	1.51635	1.74328	2.43876	2.91365
	1.46662	1.79177	1.57073	1.66281	2.61611	3.21918			1.30842	1.34936	1.51635	1.74328	2.43876	2.91365
	1.52678	1.81276	1.62698	1.71593	2.64788	3.24755			1.32522	1.38195	1.53417	1.76203	2.47652	2.9324
	1.52678	1.81276	1.62698	1.71593	2.64788	3.24755			1.32522	1.38195	1.53417	1.76203	2.47652	2.9324
	1.48733	1.84088	1.6076	1.70005	2.63277	3.22952			1.30881	1.3824	1.5176	1.75161	2.48564	2.94082
	1.48733	1.84088	1.6076	1.70005	2.63277	3.22952			1.30881	1.3824	1.5176	1.75161	2.48564	2.94082
	1.52756	1.83017	1.62792	1.70968	2.69423	3.29659			1.35842	1.38329	1.55229	1.78755	2.5346	2.97351
	1.52756	1.83017	1.62792	1.70968	2.69423	3.29659			1.35842	1.38329	1.55229	1.78755	2.5346	2.97351
	1.54905	1.84981	1.6426	1.76098	2.72366	3.30356			1.32639	1.41945	1.55198	1.78624	2.53277	2.96894
	1.54905	1.84981	1.6426	1.76098	2.72366	3.30356			1.32639	1.41945	1.55198	1.78624	2.53277	2.96894
	1.51389	1.85517	1.64604	1.74562	2.72079	3.30332			1.36233	1.39401	1.55385	1.79614	2.55621	2.99322
	1.51389	1.85517	1.64604	1.74562	2.72079	3.30332			1.36233	1.39401	1.55385	1.79614	2.55621	2.99322
	1.58577	1.88641	1.67667	1.76567	2.75751	3.36341			1.39748	1.40427	1.61573	1.84666	2.59345	3.04178
	1.58577	1.88641	1.67667	1.76567	2.75751	3.36341			1.39748	1.40427	1.61573	1.84666	2.59345	3.04178
	1.5885	1.89758	1.69667	1.77557	2.77522	3.39562			1.35061	1.40695	1.57323	1.82453	2.57001	3.02327
	1.5885	1.89758	1.69667	1.77557	2.77522	3.39562			1.35061	1.40695	1.57323	1.82453	2.57001	3.02327
	1.54514	1.88999	1.68135	1.76437	2.79918	3.40908			1.37639	1.39222	1.60104	1.85734	2.62444	3.06221
	1.54514	1.88999	1.68135	1.76437	2.79918	3.40908			1.37639	1.39222	1.60104	1.85734	2.62444	3.06221
	1.62678	1.90918	1.72635	1.80812	2.83824	3.42543			1.41897	1.44892	1.62542	1.88416	2.65387	3.10644
	1.62678	1.90918	1.72635	1.80812	2.83824	3.42543			1.41897	1.44892	1.62542	1.88416	2.65387	3.10644
	1.59788	1.94133	1.71292	1.81593	2.82157	3.41846			1.39475	1.41945	1.60604	1.86124	2.6609	3.10235
	1.59788	1.94133	1.71292	1.81593	2.82157	3.41846			1.39475	1.41945	1.60604	1.86124	2.6609	3.10235
	1.61819	1.91767	1.72635	1.80994	2.84501	3.46533			1.44592	1.47749	1.65417	1.90213	2.69189	3.13865
	1.61819	1.91767	1.72635	1.80994	2.84501	3.46533			1.44592	1.47749	1.65417	1.90213	2.69189	3.13865
	1.6592	1.94847	1.76229	1.85447	2.88668	3.48721			1.40452	1.48597	1.64635	1.91827	2.7096	3.13937
	1.6592	1.94847	1.76229	1.85447	2.88668	3.48721			1.40452	1.48597	1.64635	1.91827	2.7096	3.13937
	1.61506	1.94088	1.74885	1.82453	2.89605	3.50332			1.42444	1.45204	1.66042	1.89692	2.71506	3.17543
	1.61506	1.94088	1.74885	1.82453	2.89605	3.50332			1.42444	1.45204	1.66042	1.89692	2.71506	3.17543
	1.66272	1.93597	1.7801	1.85447	2.91793	3.55644			1.45608	1.47481	1.72385	1.95109	2.7471	3.19346
	1.66272	1.93597	1.7801	1.85447	2.91793	3.55644			1.45608	1.47481	1.72385	1.95109	2.7471	3.19346
	1.67248	2.00918	1.78573	1.87817	2.95282	3.58			1.4178	1.48865	1.69854	1.94145	2.73902	3.2038
	1.67248	2.00918	1.78573	1.87817	2.95282	3.58			1.4178	1.48865	1.69854	1.94145	2.73902	3.2038
	1.6428	1.98731	1.78385	1.85083	2.95621	3.58361			1.46467	1.46901	1.7076	1.95447	2.78199	3.24034
	1.6428	1.98731	1.78385	1.85083	2.95621	3.58361			1.46467	1.46901	1.7076	1.95447	2.78199	3.24034
	1.72444	2.01811	1.83385	1.90812	3.00282	3.60596			1.50686	1.50918	1.7451	2.01229	2.82105	3.25644
	1.72444	2.01811	1.83385	1.90812	3.00282	3.60596			1.50686	1.50918	1.7451	2.01229	2.82105	3.25644
	1.68694	2.03419	1.84667	1.90213	3.00543	3.60644			1.45452	1.51365	1.74885	1.96281	2.80986	3.24635
	1.68694	2.03419	1.84667	1.90213	3.00543	3.60644			1.45452	1.51365	1.74885	1.96281	2.80986	3.24635
	1.69631	1.97838	1.83073	1.91593	3.02574	3.63601			1.5303	1.5007	1.7826	1.98729	2.85335	3.31365
	1.69631	1.97838	1.83073	1.91593	3.02574	3.63601			1.5303	1.5007	1.7826	1.98729	2.85335	3.31365
	1.7385	2.04043	1.86198	1.95005	3.07105	3.67447			1.52248	1.54579	1.78042	2.00994	2.86715	3.3074
	1.7385	2.04043	1.86198	1.95005	3.07105	3.67447			1.52248	1.54579	1.78042	2.00994	2.86715	3.3074
	1.6678	2.04892	1.87792	1.9313	3.04788	3.68553			1.54163	1.53508	1.7676	1.9826	2.87861	3.30933
	1.6678	2.04892	1.87792	1.9313	3.04788	3.68553			1.54163	1.53508	1.7676	1.9826	2.87861	3.30933
	1.71116	2.04713	1.90073	1.95291	3.09163	3.73096			1.57951	1.55204	1.82885	2.04458	2.91845	3.33336
	1.71116	2.04713	1.90073	1.95291	3.09163	3.73096			1.57951	1.55204	1.82885	2.04458	2.91845	3.33336
	1.74436	2.07704	1.89917	1.97453	3.12418	3.74971			1.54397	1.57124	1.8301	2.04223	2.9135	3.34899
	1.74436	2.07704	1.89917	1.97453	3.12418	3.74971			1.54397	1.57124	1.8301	2.04223	2.9135	3.34899
	1.71272	2.05293	1.9051	1.94588	3.13512	3.74442			1.57834	1.54043	1.82917	2.03937	2.94189	3.38697
	1.71272	2.05293	1.9051	1.94588	3.13512	3.74442			1.57834	1.54043	1.82917	2.03937	2.94189	3.38697
	1.74944	2.044	1.9476	1.98781	3.16558	3.80308			1.62327	1.56142	1.85667	2.10656	2.98538	3.41149
	1.74944	2.044	1.9476	1.98781	3.16558	3.80308			1.62327	1.56142	1.85667	2.10656	2.98538	3.41149
	1.73498	2.08329	1.93385	1.99848	3.17183	3.80067			1.54983	1.57704	1.85104	2.07296	2.96767	3.40933
	1.73498	2.08329	1.93385	1.99848	3.17183	3.80067			1.54983	1.57704	1.85104	2.07296	2.96767	3.40933
	1.75217	2.10784	1.92385	1.99223	3.18564	3.82038			1.5885	1.57838	1.87479	2.0852	3.01871	3.43481
	1.75217	2.10784	1.92385	1.99223	3.18564	3.82038			1.5885	1.57838	1.87479	2.0852	3.01871	3.43481
	1.80334	2.1074	1.98979	2.02713	3.24657	3.85067			1.59397	1.60249	1.89823	2.12713	3.04058	3.46125
	1.80334	2.1074	1.98979	2.02713	3.24657	3.85067			1.59397	1.60249	1.89823	2.12713	3.04058	3.46125
	1.77951	2.12258	1.95448	2.02166	3.22913	3.86197			1.56311	1.58463	1.89167	2.10421	3.01949	3.45332
	1.77951	2.12258	1.95448	2.02166	3.22913	3.86197			1.56311	1.58463	1.89167	2.10421	3.01949	3.45332
	1.81936	2.08954	1.98885	2.03729	3.24736	3.9086			1.62756	1.61365	1.91698	2.14536	3.07183	3.49923
	1.81936	2.08954	1.98885	2.03729	3.24736	3.9086			1.62756	1.61365	1.91698	2.14536	3.07183	3.49923
	1.83381	2.13374	2.02042	2.07088	3.28694	3.92423			1.601	1.63954	1.9201	2.1438	3.08043	3.48649
	1.83381	2.13374	2.02042	2.07088	3.28694	3.92423			1.601	1.63954	1.9201	2.1438	3.08043	3.48649
	1.79787	2.13954	2.01666	2.05942	3.28486	3.9163			1.60373	1.63552	1.91917	2.14328	3.10413	3.51437
	1.79787	2.13954	2.01666	2.05942	3.28486	3.9163			1.60373	1.63552	1.91917	2.14328	3.10413	3.51437
	1.84123	2.12392	2.0401	2.07947	3.31272	3.96558			1.64475	1.65874	1.97979	2.1865	3.13954	3.53889
	1.84123	2.12392	2.0401	2.07947	3.31272	3.96558			1.64475	1.65874	1.97979	2.1865	3.13954	3.53889
	1.84201	2.15249	2.0501	2.0839	3.33538	3.97111			1.59866	1.66365	1.97542	2.17062	3.10933	3.55139
	1.84201	2.15249	2.0501	2.0839	3.33538	3.97111			1.59866	1.66365	1.97542	2.17062	3.10933	3.55139
	1.84827	2.17704	2.04135	2.0826	3.34657	3.97111			2.68186	2.62972	2.51698	2.67453	3.66767	4.1026
	1.84827	2.17704	2.04135	2.0826	3.34657	3.97111			2.68186	2.62972	2.51698	2.67453	3.66767	4.1026
	1.92092	2.16543	2.08542	2.11281	3.38512	4.01678			6.98694	7.48106	4.15104	4.31229	5.38277	5.87543
	1.92092	2.16543	2.08542	2.11281	3.38512	4.01678			6.98694	7.48106	4.15104	4.31229	5.38277	5.87543
	1.85334	2.19534	2.0776	2.10031	3.3609	4.0199			6.49787	7.97481	3.73073	3.91906	4.71715	5.23048
	1.85334	2.19534	2.0776	2.10031	3.3609	4.0199			6.49787	7.97481	3.73073	3.91906	4.71715	5.23048
	1.86467	2.1757	2.0876	2.12062	3.40621	4.05788			4.75178	6.27615	3.17573	3.39458	4.02314	4.51221
	1.86467	2.1757	2.0876	2.12062	3.40621	4.05788			4.75178	6.27615	3.17573	3.39458	4.02314	4.51221
	1.90334	2.2007	2.10917	2.15864	3.4484	4.05668			3.35959	4.69668	2.75385	2.96098	3.46012	3.90909
	1.90334	2.2007	2.10917	2.15864	3.4484	4.05668			3.35959	4.69668	2.75385	2.96098	3.46012	3.90909
	1.87131	2.2074	2.12479	2.14327	3.44084	4.06149			0.406078	1.55918	1.33448	1.58494	1.94527	2.39586
	1.87131	2.2074	2.12479	2.14327	3.44084	4.06149			0.406078	1.55918	1.33448	1.58494	1.94527	2.39586
	1.92444	2.21901	2.14542	2.15838	3.46767	4.12663			-8.16697	-8.26626	-1.9574	-1.66896	-1.45264	-1.17264
	1.92444	2.21901	2.14542	2.15838	3.46767	4.12663			-8.16697	-8.26626	-1.9574	-1.66896	-1.45264	-1.17264
	1.91858	2.27749	2.1276	2.18885	3.50517	4.13361			-7.68299	-9.63278	-1.27615	-1.07704	-0.253945	0.0295194
	1.91858	2.27749	2.1276	2.18885	3.50517	4.13361			-7.68299	-9.63278	-1.27615	-1.07704	-0.253945	0.0295194
	1.89397	2.24579	2.14479	2.16515	3.4898	4.13288			-4.40213	-6.74394	-0.120834	0.0638486	1.24006	1.57447
	1.89397	2.24579	2.14479	2.16515	3.4898	4.13288			-4.40213	-6.74394	-0.120834	0.0638486	1.24006	1.57447
	1.96624	2.25026	2.17229	2.22479	3.5398	4.17495			-1.84392	-3.80153	0.778852	0.95291	2.41272	2.77038
	1.96624	2.25026	2.17229	2.22479	3.5398	4.17495			-1.84392	-3.80153	0.778852	0.95291	2.41272	2.77038
	1.90842	2.26811	2.17479	2.2115	3.52756	4.18024			1.01662	-0.576977	2.02885	2.13494	3.93043	4.29731
	1.90842	2.26811	2.17479	2.2115	3.52756	4.18024			1.01662	-0.576977	2.02885	2.13494	3.93043	4.29731
	1.90764	2.27481	2.17104	2.22661	3.55126	4.20115			6.34826	5.7074	4.23729	4.42036	6.13121	6.63312
	1.90764	2.27481	2.17104	2.22661	3.55126	4.20115			6.34826	5.7074	4.23729	4.42036	6.13121	6.63312
	1.95998	2.30874	2.23042	2.2714	3.59371	4.22471			6.00373	6.60249	3.71198	3.93937	5.17991	5.65428
	1.95998	2.30874	2.23042	2.2714	3.59371	4.22471			6.00373	6.60249	3.71198	3.93937	5.17991	5.65428
	1.93694	2.3132	2.21604	2.23234	3.58538	4.21293			4.26467	5.17079	3.0576	3.25708	4.34996	4.8151
	1.93694	2.3132	2.21604	2.23234	3.58538	4.21293			4.26467	5.17079	3.0576	3.25708	4.34996	4.8151
	1.96663	2.30606	2.22885	2.27036	3.59996	4.25933			3.13772	3.79043	2.67385	2.89119	3.92808	4.36918
	1.96663	2.30606	2.22885	2.27036	3.59996	4.25933			3.13772	3.79043	2.67385	2.89119	3.92808	4.36918
	1.97483	2.35651	2.25979	2.28781	3.64684	4.28192			2.44827	2.92481	2.44073	2.65682	3.65491	4.09466
	1.97483	2.35651	2.25979	2.28781	3.64684	4.28192			2.44827	2.92481	2.44073	2.65682	3.65491	4.09466
	1.96272	2.36052	2.25604	2.26723	3.62913	4.27591			2.09358	2.41186	2.30979	2.51281	3.44657	3.88745
	1.96272	2.36052	2.25604	2.26723	3.62913	4.27591			2.09358	2.41186	2.30979	2.51281	3.44657	3.88745
	2.02561	2.35338	2.28073	2.30656	3.64788	4.32928			1.90295	2.16722	2.21323	2.43416	3.37626	3.7788
	2.02561	2.35338	2.28073	2.30656	3.64788	4.32928			1.90295	2.16722	2.21323	2.43416	3.37626	3.7788
	2.01311	2.37168	2.28604	2.31437	3.65569	4.33961			1.72249	1.97615	2.12604	2.33937	3.33616	3.73673
	2.01311	2.37168	2.28604	2.31437	3.65569	4.33961			1.72249	1.97615	2.12604	2.33937	3.33616	3.73673
	1.99983	2.36409	2.2851	2.29562	3.67809	4.35812			1.68108	1.79936	2.11292	2.29718	3.3971	3.79442
	1.99983	2.36409	2.2851	2.29562	3.67809	4.35812			1.68108	1.79936	2.11292	2.29718	3.3971	3.79442
	2.05608	2.39668	2.32479	2.33078	3.73095	4.38529			1.69241	1.77927	2.12135	2.32635	3.4898	3.89154
	2.05608	2.39668	2.32479	2.33078	3.73095	4.38529			1.69241	1.77927	2.12135	2.32635	3.4898	3.89154
	2.01467	2.38686	2.30635	2.32088	3.70282	4.37735			1.69826	1.74356	2.13667	2.31671	3.52939	3.95428
	2.01467	2.38686	2.30635	2.32088	3.70282	4.37735			1.69826	1.74356	2.13667	2.31671	3.52939	3.95428
	2.03186	2.37659	2.3276	2.34249	3.73616	4.40356			1.80256	1.76142	2.20479	2.38624	3.59085	4.0336
	2.03186	2.37659	2.3276	2.34249	3.73616	4.40356			1.80256	1.76142	2.20479	2.38624	3.59085	4.0336
	2.051	2.42704	2.34635	2.38729	3.79527	4.42086			1.79319	1.84758	2.23292	2.42739	3.57835	4.03505
	2.051	2.42704	2.34635	2.38729	3.79527	4.42086			1.79319	1.84758	2.23292	2.42739	3.57835	4.03505
	2.01975	2.41588	2.33948	2.35031	3.76038	4.41317			1.83108	1.88374	2.28198	2.45942	3.58694	4.02711
	2.01975	2.41588	2.33948	2.35031	3.76038	4.41317			1.83108	1.88374	2.28198	2.45942	3.58694	4.02711
	2.07014	2.41186	2.36073	2.39432	3.78277	4.44466			1.90295	1.94043	2.3376	2.52244	3.59762	4.01413
	2.07014	2.41186	2.36073	2.39432	3.78277	4.44466			1.90295	1.94043	2.3376	2.52244	3.59762	4.01413
	2.05569	2.43374	2.37135	2.40942	3.7984	4.47736			1.85647	2.00874	2.32448	2.51437	3.576	3.99226
	2.05569	2.43374	2.37135	2.40942	3.7984	4.47736			1.85647	2.00874	2.32448	2.51437	3.576	3.99226
	2.0553	2.40829	2.36573	2.37765	3.81741	4.45836			1.90061	1.99445	2.36573	2.53156	3.60803	4.02687
	2.0553	2.40829	2.36573	2.37765	3.81741	4.45836			1.90061	1.99445	2.36573	2.53156	3.60803	4.02687
	2.11233	2.43284	2.41042	2.44145	3.86819	4.49851			1.9053	2.0574	2.36573	2.56984	3.66741	4.04731
	2.11233	2.43284	2.41042	2.44145	3.86819	4.49851			1.9053	2.0574	2.36573	2.56984	3.66741	4.04731
	2.03616	2.46409	2.40417	2.43025	3.85517	4.49442			1.83967	2.01276	2.34635	2.52999	3.65647	4.07471
	2.03616	2.46409	2.40417	2.43025	3.85517	4.49442			1.83967	2.01276	2.34635	2.52999	3.65647	4.07471
	2.05686	2.45829	2.4176	2.42999	3.88798	4.54803			1.83654	1.98284	2.36635	2.53468	3.70699	4.11125
	2.05686	2.45829	2.4176	2.42999	3.88798	4.54803			1.83654	1.98284	2.36635	2.53468	3.70699	4.11125
	2.12053	2.50874	2.43573	2.47218	3.91793	4.57687			1.8217	1.94267	2.36666	2.5326	3.70777	4.12351
	2.12053	2.50874	2.43573	2.47218	3.91793	4.57687			1.8217	1.94267	2.36666	2.5326	3.70777	4.12351
	2.10491	2.50159	2.4401	2.44458	3.9096	4.56293			1.82248	1.88865	2.35542	2.50109	3.71298	4.1276
	2.10491	2.50159	2.4401	2.44458	3.9096	4.56293			1.82248	1.88865	2.35542	2.50109	3.71298	4.1276
	2.13537	2.48374	2.45667	2.47687	3.91689	4.61269			1.87248	1.87258	2.38635	2.56645	3.73433	4.14322
	2.13537	2.48374	2.45667	2.47687	3.91689	4.61269			1.87248	1.87258	2.38635	2.56645	3.73433	4.14322
	2.12639	2.51365	2.46979	2.49197	3.95282	4.61534			1.84084	1.89981	2.38479	2.55838	3.71116	4.13817
	2.12639	2.51365	2.46979	2.49197	3.95282	4.61534			1.84084	1.89981	2.38479	2.55838	3.71116	4.13817
	2.0842	2.48642	2.46948	2.46124	3.95152	4.59322			1.84592	1.89311	2.39417	2.55864	3.72626	4.14034
	2.0842	2.48642	2.46948	2.46124	3.95152	4.59322			1.84592	1.89311	2.39417	2.55864	3.72626	4.14034
	2.14436	2.49891	2.49729	2.50942	3.96506	4.62928			1.88733	1.9199	2.43198	2.59666	3.77366	4.16149
	2.14436	2.49891	2.49729	2.50942	3.96506	4.62928			1.88733	1.9199	2.43198	2.59666	3.77366	4.16149
	2.14709	2.53374	2.49979	2.50525	3.98251	4.63072			1.87444	1.93865	2.42885	2.57947	3.75829	4.17423
	2.14709	2.53374	2.49979	2.50525	3.98251	4.63072			1.87444	1.93865	2.42885	2.57947	3.75829	4.17423
	2.15373	2.49222	2.48916	2.50109	3.99683	4.64586			1.91272	1.92749	2.46323	2.6188	3.77314	4.21077
	2.15373	2.49222	2.48916	2.50109	3.99683	4.64586			1.91272	1.92749	2.46323	2.6188	3.77314	4.21077
	2.21662	2.52615	2.52635	2.5227	4.0484	4.65692			1.94319	1.95383	2.47823	2.65031	3.81559	4.21558
	2.21662	2.52615	2.52635	2.5227	4.0484	4.65692			1.94319	1.95383	2.47823	2.65031	3.81559	4.21558
	2.15334	2.53865	2.49292	2.51333	4.02444	4.66341			1.90999	1.95829	2.48354	2.62895	3.80569	4.20067
	2.15334	2.53865	2.49292	2.51333	4.02444	4.66341			1.90999	1.95829	2.48354	2.62895	3.80569	4.20067
	2.20569	2.51186	2.53167	2.51958	4.05725	4.68673			1.97444	1.97659	2.50541	2.69275	3.83512	4.24154
	2.20569	2.51186	2.53167	2.51958	4.05725	4.68673			1.97444	1.97659	2.50541	2.69275	3.83512	4.24154
	2.20803	2.57302	2.55635	2.57114	4.11793	4.70692			1.92639	2.01633	2.50854	2.65812	3.83121	4.22976
	2.20803	2.57302	2.55635	2.57114	4.11793	4.70692			1.92639	2.01633	2.50854	2.65812	3.83121	4.22976
	2.16936	2.53195	2.54854	2.51775	4.08564	4.70332			1.92795	1.9949	2.50448	2.65499	3.83642	4.25909
	2.16936	2.53195	2.54854	2.51775	4.08564	4.70332			1.92795	1.9949	2.50448	2.65499	3.83642	4.25909
	2.22405	2.53686	2.56885	2.56307	4.09423	4.74971			1.98577	2.00829	2.54541	2.70734	3.88564	4.27952
	2.22405	2.53686	2.56885	2.56307	4.09423	4.74971			1.98577	2.00829	2.54541	2.70734	3.88564	4.27952
	2.19983	2.56588	2.5626	2.56541	4.11116	4.73649			1.92405	2.00383	2.53323	2.66775	3.85256	4.255
	2.19983	2.56588	2.5626	2.56541	4.11116	4.73649			1.92405	2.00383	2.53323	2.66775	3.85256	4.255
	2.18225	2.52615	2.56729	2.56671	4.11663	4.74779			1.95803	2.00874	2.53667	2.71854	3.90048	4.3026
	2.18225	2.52615	2.56729	2.56671	4.11663	4.74779			1.95803	2.00874	2.53667	2.71854	3.90048	4.3026
	2.24983	2.56856	2.58635	2.61619	4.16246	4.79034			1.9717	2.01097	2.55698	2.74406	3.93407	4.30716
	2.24983	2.56856	2.58635	2.61619	4.16246	4.79034			1.9717	2.01097	2.55698	2.74406	3.93407	4.30716
	2.21155	2.58954	2.59948	2.58937	4.1385	4.78457			1.95022	1.99043	2.55166	2.71333	3.9023	4.30043
	2.21155	2.58954	2.59948	2.58937	4.1385	4.78457			1.95022	1.99043	2.55166	2.71333	3.9023	4.30043
	2.25178	2.56677	2.60542	2.5977	4.17861	4.81534			2.00842	2.00249	2.59416	2.74874	3.9523	4.33625
	2.25178	2.56677	2.60542	2.5977	4.17861	4.81534			2.00842	2.00249	2.59416	2.74874	3.9523	4.33625
	2.29709	2.59668	2.63917	2.65682	4.19762	4.82038			1.97131	2.03195	2.59354	2.75682	3.94866	4.34442
	2.29709	2.59668	2.63917	2.65682	4.19762	4.82038			1.97131	2.03195	2.59354	2.75682	3.94866	4.34442
	2.2385	2.61052	2.61354	2.5964	4.19996	4.81461			1.97678	2.00561	2.58167	2.72869	3.95621	4.34875
	2.2385	2.61052	2.61354	2.5964	4.19996	4.81461			1.97678	2.00561	2.58167	2.72869	3.95621	4.34875
	2.29045	2.59624	2.66229	2.63182	4.21975	4.87086			2.04748	2.03508	2.63292	2.79926	3.99996	4.36437
	2.29045	2.59624	2.66229	2.63182	4.21975	4.87086			2.04748	2.03508	2.63292	2.79926	3.99996	4.36437
	2.25412	2.62793	2.6776	2.66906	4.25022	4.87375			1.98928	2.05651	2.62604	2.78312	3.97236	4.36582
	2.25412	2.62793	2.6776	2.66906	4.25022	4.87375			1.98928	2.05651	2.62604	2.78312	3.97236	4.36582
	2.2592	2.62704	2.6501	2.63286	4.24032	4.84586			2.01194	2.03106	2.65354	2.78364	3.99423	4.39202
	2.2592	2.62704	2.6501	2.63286	4.24032	4.84586			2.01194	2.03106	2.65354	2.78364	3.99423	4.39202
	2.30959	2.6315	2.70073	2.69223	4.2734	4.89923			2.06467	2.07034	2.67104	2.8227	4.02887	4.40668
	2.30959	2.6315	2.70073	2.69223	4.2734	4.89923			2.06467	2.07034	2.67104	2.8227	4.02887	4.40668
	2.24202	2.65293	2.69104	2.67088	4.2721	4.89947			2.01897	2.07436	2.64104	2.81281	4.02079	4.39418
	2.24202	2.65293	2.69104	2.67088	4.2721	4.89947			2.01897	2.07436	2.64104	2.81281	4.02079	4.39418
	2.27795	2.62615	2.70542	2.69301	4.27782	4.91341			2.06428	2.04713	2.68104	2.85005	4.04996	4.43072
	2.27795	2.62615	2.70542	2.69301	4.27782	4.91341			2.06428	2.04713	2.68104	2.85005	4.04996	4.43072
	2.31975	2.66945	2.7326	2.72114	4.31663	4.91413			2.03381	2.08597	2.69385	2.84874	4.07105	4.43457
	2.31975	2.66945	2.7326	2.72114	4.31663	4.91413			2.03381	2.08597	2.69385	2.84874	4.07105	4.43457
	2.28928	2.67258	2.72042	2.69796	4.27418	4.90692			2.02834	2.06276	2.67823	2.81984	4.07678	4.42639
	2.28928	2.67258	2.72042	2.69796	4.27418	4.90692			2.02834	2.06276	2.67823	2.81984	4.07678	4.42639
	2.3592	2.65338	2.72167	2.73468	4.32131	4.94442			2.09436	2.08954	2.72104	2.89275	4.10439	4.47375
	2.3592	2.65338	2.72167	2.73468	4.32131	4.94442			2.09436	2.08954	2.72104	2.89275	4.10439	4.47375
	2.35686	2.6757	2.74385	2.74848	4.35699	4.94755			2.05334	2.09356	2.69291	2.87062	4.1023	4.46077
	2.35686	2.6757	2.74385	2.74848	4.35699	4.94755			2.05334	2.09356	2.69291	2.87062	4.1023	4.46077
	2.32248	2.66811	2.73104	2.70551	4.33564	4.94923			2.07717	2.07526	2.70635	2.85473	4.11559	4.49514
	2.32248	2.66811	2.73104	2.70551	4.33564	4.94923			2.07717	2.07526	2.70635	2.85473	4.11559	4.49514
	2.35569	2.67213	2.77229	2.76541	4.37887	4.97351			2.11272	2.09133	2.75041	2.92453	4.15465	4.51005
	2.35569	2.67213	2.77229	2.76541	4.37887	4.97351			2.11272	2.09133	2.75041	2.92453	4.15465	4.51005
	2.31702	2.70561	2.77854	2.76255	4.37183	4.99322			2.08694	2.07213	2.73635	2.91802	4.15569	4.50764
	2.31702	2.70561	2.77854	2.76255	4.37183	4.99322			2.08694	2.07213	2.73635	2.91802	4.15569	4.50764
	2.32053	2.70025	2.77323	2.75447	4.40022	5.00885			2.12522	2.08865	2.75917	2.92843	4.1734	4.53601
	2.32053	2.70025	2.77323	2.75447	4.40022	5.00885			2.12522	2.08865	2.75917	2.92843	4.1734	4.53601
	2.37795	2.70025	2.8151	2.81333	4.43928	5.00981			2.11155	2.13195	2.77385	2.95005	4.21272	4.54995
	2.37795	2.70025	2.8151	2.81333	4.43928	5.00981			2.11155	2.13195	2.77385	2.95005	4.21272	4.54995
	2.32717	2.73061	2.79948	2.78025	4.41246	5.0038			2.09006	2.11142	2.77448	2.92114	4.20517	4.54298
	2.32717	2.73061	2.79948	2.78025	4.41246	5.0038			2.09006	2.11142	2.77448	2.92114	4.20517	4.54298
	2.35256	2.70338	2.83385	2.80343	4.4135	5.03673			2.16506	2.14043	2.83291	2.98312	4.25074	4.59995
	2.35256	2.70338	2.83385	2.80343	4.4135	5.03673			2.16506	2.14043	2.83291	2.98312	4.25074	4.59995
	2.38498	2.73865	2.83854	2.82791	4.46532	5.03865			2.13733	2.17034	2.83417	2.95578	4.22704	4.59971
	2.38498	2.73865	2.83854	2.82791	4.46532	5.03865			2.13733	2.17034	2.83417	2.95578	4.22704	4.59971
	2.33928	2.72659	2.79479	2.79015	4.45361	5.02639			2.13498	2.15204	2.82729	2.96203	4.24996	4.60067
	2.33928	2.72659	2.79479	2.79015	4.45361	5.02639			2.13498	2.15204	2.82729	2.96203	4.24996	4.60067
	2.38264	2.72168	2.84573	2.82661	4.49111	5.07375			2.19553	2.16856	2.86885	3.01203	4.29345	4.62351
	2.38264	2.72168	2.84573	2.82661	4.49111	5.07375			2.19553	2.16856	2.86885	3.01203	4.29345	4.62351
	2.37912	2.73909	2.85167	2.82453	4.48407	5.06005			2.17405	2.17704	2.8451	2.98234	4.28538	4.63625
	2.37912	2.73909	2.85167	2.82453	4.48407	5.06005			2.17405	2.17704	2.8451	2.98234	4.28538	4.63625
	2.36428	2.75204	2.8351	2.81124	4.47626	5.07663			2.21741	2.15784	2.8701	3.024	4.31767	4.6812
	2.36428	2.75204	2.8351	2.81124	4.47626	5.07663			2.21741	2.15784	2.8701	3.024	4.31767	4.6812
	2.39631	2.76097	2.87104	2.86671	4.51116	5.10163			2.22873	2.21409	2.88135	3.02947	4.33772	4.68433
	2.39631	2.76097	2.87104	2.86671	4.51116	5.10163			2.22873	2.21409	2.88135	3.02947	4.33772	4.68433
	2.39553	2.77927	2.87823	2.85604	4.51689	5.08312			2.18186	2.18195	2.8726	3.00161	4.34683	4.69779
	2.39553	2.77927	2.87823	2.85604	4.51689	5.08312			2.18186	2.18195	2.8726	3.00161	4.34683	4.69779
	2.41584	2.75918	2.88166	2.87244	4.52652	5.12183			2.24045	2.18597	2.90448	3.06697	4.36923	4.72183
	2.41584	2.75918	2.88166	2.87244	4.52652	5.12183			2.24045	2.18597	2.90448	3.06697	4.36923	4.72183
	2.4342	2.76409	2.89917	2.89171	4.56272	5.14514			2.22991	2.22258	2.90979	3.05708	4.35855	4.71726
	2.4342	2.76409	2.89917	2.89171	4.56272	5.14514			2.22991	2.22258	2.90979	3.05708	4.35855	4.71726
	2.37561	2.76722	2.89229	2.85473	4.56428	5.13481			2.22287	2.22034	2.9076	3.03833	4.39866	4.73721
	2.37561	2.76722	2.89229	2.85473	4.56428	5.13481			2.22287	2.22034	2.9076	3.03833	4.39866	4.73721
	2.42092	2.76008	2.90791	2.89249	4.58147	5.17976			2.27014	2.24713	2.9476	3.10864	4.45803	4.76798
	2.42092	2.76008	2.90791	2.89249	4.58147	5.17976			2.27014	2.24713	2.9476	3.10864	4.45803	4.76798
	2.39865	2.769	2.93104	2.91515	4.59996	5.18721			2.24905	2.26186	2.94604	3.08729	4.44423	4.76534
	2.39865	2.769	2.93104	2.91515	4.59996	5.18721			2.24905	2.26186	2.94604	3.08729	4.44423	4.76534
	2.39866	2.76633	2.92104	2.88755	4.59501	5.16654			2.27209	2.25427	2.96979	3.09432	4.47418	4.80548
	2.39866	2.76633	2.92104	2.88755	4.59501	5.16654			2.27209	2.25427	2.96979	3.09432	4.47418	4.80548
	2.45451	2.7824	2.95042	2.93442	4.61506	5.20861			2.31155	2.29222	3.0126	3.13911	4.50934	4.83336
	2.45451	2.7824	2.95042	2.93442	4.61506	5.20861			2.31155	2.29222	3.0126	3.13911	4.50934	4.83336
	2.42405	2.79713	2.92948	2.90604	4.62053	5.20115			2.27444	2.32079	3.00291	3.10187	4.49319	4.82111
	2.42405	2.79713	2.92948	2.90604	4.62053	5.20115			2.27444	2.32079	3.00291	3.10187	4.49319	4.82111
	2.44787	2.77347	2.94354	2.9214	4.63199	5.20428			2.326	2.32481	3.00448	3.14614	4.5385	4.86798
	2.44787	2.77347	2.94354	2.9214	4.63199	5.20428			2.326	2.32481	3.00448	3.14614	4.5385	4.86798
	2.48029	2.8257	2.9826	2.95343	4.676	5.21245			2.33498	2.35651	3.0301	3.18729	4.56767	4.88865
	2.48029	2.8257	2.9826	2.95343	4.676	5.21245			2.33498	2.35651	3.0301	3.18729	4.56767	4.88865
	2.4428	2.8257	2.96292	2.93286	4.64085	5.20452			2.32795	2.34133	3.04979	3.15447	4.56871	4.90139
	2.4428	2.8257	2.96292	2.93286	4.64085	5.20452			2.32795	2.34133	3.04979	3.15447	4.56871	4.90139
	2.46975	2.83195	2.96698	2.949	4.66663	5.24514			2.40178	2.37749	3.08854	3.21046	4.61923	4.94851
	2.46975	2.83195	2.96698	2.949	4.66663	5.24514			2.40178	2.37749	3.08854	3.21046	4.61923	4.94851
	2.47483	2.87213	2.98635	2.98546	4.69579	5.23649			2.38655	2.38463	3.06417	3.18546	4.60881	4.95692
	2.47483	2.87213	2.98635	2.98546	4.69579	5.23649			2.38655	2.38463	3.06417	3.18546	4.60881	4.95692
	2.46311	2.85874	2.98854	2.95291	4.67887	5.23985			2.39514	2.37883	3.07823	3.19744	4.65361	5.00067
	2.46311	2.85874	2.98854	2.95291	4.67887	5.23985			2.39514	2.37883	3.07823	3.19744	4.65361	5.00067
	2.51545	2.84713	3.00979	3.00395	4.71923	5.27375			2.43889	2.43552	3.10792	3.25499	4.69059	5.02135
	2.51545	2.84713	3.00979	3.00395	4.71923	5.27375			2.43889	2.43552	3.10792	3.25499	4.69059	5.02135
	2.47092	2.8699	3.01167	2.99744	4.71611	5.27279			2.3678	2.46052	3.12792	3.2365	4.69215	5.01293
	2.47092	2.8699	3.01167	2.99744	4.71611	5.27279			2.3678	2.46052	3.12792	3.2365	4.69215	5.01293
	2.47991	2.84133	3.00979	2.99354	4.73043	5.27711			2.4174	2.43508	3.13385	3.27557	4.72808	5.05572
	2.47991	2.84133	3.00979	2.99354	4.73043	5.27711			2.4174	2.43508	3.13385	3.27557	4.72808	5.05572
	2.54514	2.88106	3.03979	3.02505	4.78277	5.29923			2.43342	2.47436	3.14604	3.28624	4.76793	5.08433
	2.54514	2.88106	3.03979	3.02505	4.78277	5.29923			2.43342	2.47436	3.14604	3.28624	4.76793	5.08433
	2.52873	2.88284	3.03854	2.99979	4.75751	5.29707			2.40647	2.48642	3.14667	3.26463	4.76975	5.09106
	2.52873	2.88284	3.03854	2.99979	4.75751	5.29707			2.40647	2.48642	3.14667	3.26463	4.76975	5.09106
	2.53342	2.84981	3.02448	3.00708	4.75491	5.30933			2.4803	2.49936	3.19385	3.30838	4.7971	5.14659
	2.53342	2.84981	3.02448	3.00708	4.75491	5.30933			2.4803	2.49936	3.19385	3.30838	4.7971	5.14659
	2.54084	2.86633	3.06198	3.03312	4.80543	5.3086			2.45647	2.55338	3.19354	3.31489	4.81793	5.17159
	2.54084	2.86633	3.06198	3.03312	4.80543	5.3086			2.45647	2.55338	3.19354	3.31489	4.81793	5.17159
	2.49045	2.87392	3.04666	2.99718	4.78381	5.28769			2.4635	2.50829	3.18417	3.31723	4.83902	5.21245
	2.49045	2.87392	3.04666	2.99718	4.78381	5.28769			2.4635	2.50829	3.18417	3.31723	4.83902	5.21245
	2.576	2.869	3.07667	3.03989	4.82574	5.3425			2.49709	2.55517	3.23135	3.3701	4.88928	5.23721
	2.576	2.869	3.07667	3.03989	4.82574	5.3425			2.49709	2.55517	3.23135	3.3701	4.88928	5.23721
	2.52444	2.90159	3.06823	3.06515	4.81975	5.32639			2.47873	2.59356	3.23354	3.3438	4.88199	5.23625
	2.52444	2.90159	3.06823	3.06515	4.81975	5.32639			2.47873	2.59356	3.23354	3.3438	4.88199	5.23625
	2.53303	2.89624	3.06979	3.04432	4.81923	5.33865			2.53029	2.56409	3.27698	3.3615	4.92886	5.27327
	2.53303	2.89624	3.06979	3.04432	4.81923	5.33865			2.53029	2.56409	3.27698	3.3615	4.92886	5.27327
	2.57991	2.89445	3.09604	3.08156	4.83876	5.37111			2.54202	2.62659	3.30948	3.41046	4.97548	5.30284
	2.57991	2.89445	3.09604	3.08156	4.83876	5.37111			2.54202	2.62659	3.30948	3.41046	4.97548	5.30284
	2.52795	2.91275	3.09448	3.05343	4.84267	5.34346			2.52483	2.64267	3.28667	3.38416	4.96793	5.32279
	2.52795	2.91275	3.09448	3.05343	4.84267	5.34346			2.52483	2.64267	3.28667	3.38416	4.96793	5.32279
	2.5635	2.90026	3.10573	3.06697	4.85413	5.36966			2.57014	2.64133	3.31354	3.41567	5.01194	5.36413
	2.5635	2.90026	3.10573	3.06697	4.85413	5.36966			2.57014	2.64133	3.31354	3.41567	5.01194	5.36413
	2.59201	2.91811	3.11417	3.12192	4.91298	5.37303			2.57639	2.67749	3.33385	3.42296	5.03303	5.38457
	2.59201	2.91811	3.11417	3.12192	4.91298	5.37303			2.57639	2.67749	3.33385	3.42296	5.03303	5.38457
	2.5674	2.93374	3.1176	3.07661	4.876	5.36798			2.57873	2.67302	3.33354	3.42114	5.06428	5.4187
	2.5674	2.93374	3.1176	3.07661	4.876	5.36798			2.57873	2.67302	3.33354	3.42114	5.06428	5.4187
	2.61155	2.93909	3.13042	3.09171	4.90282	5.39827			2.63576	2.6815	3.37354	3.49874	5.11845	5.43577
	2.61155	2.93909	3.13042	3.09171	4.90282	5.39827			2.63576	2.6815	3.37354	3.49874	5.11845	5.43577
	2.58537	2.9565	3.15541	3.12166	4.90881	5.4026			2.59748	2.69177	3.38448	3.44614	5.10282	5.44274
	2.58537	2.9565	3.15541	3.12166	4.90881	5.4026			2.59748	2.69177	3.38448	3.44614	5.10282	5.44274
	2.57717	2.93374	3.13885	3.10734	4.90491	5.39538			2.66194	2.6882	3.3951	3.47609	5.15933	5.49731
	2.57717	2.93374	3.13885	3.10734	4.90491	5.39538			2.66194	2.6882	3.3951	3.47609	5.15933	5.49731
	2.62405	2.91543	3.17104	3.13104	4.94527	5.41774			2.68928	2.74267	3.42417	3.52192	5.19683	5.52303
	2.62405	2.91543	3.17104	3.13104	4.94527	5.41774			2.68928	2.74267	3.42417	3.52192	5.19683	5.52303
	2.57873	2.9382	3.17166	3.11567	4.92782	5.40933			2.66663	2.7507	3.43135	3.48911	5.20204	5.5276
	2.57873	2.9382	3.17166	3.11567	4.92782	5.40933			2.66663	2.7507	3.43135	3.48911	5.20204	5.5276
	2.57405	2.92525	3.17042	3.11854	4.94501	5.43336			2.72014	2.77124	3.45229	3.54796	5.24111	5.58673
	2.57405	2.92525	3.17042	3.11854	4.94501	5.43336			2.72014	2.77124	3.45229	3.54796	5.24111	5.58673
	2.60256	2.95383	3.20198	3.17739	4.97782	5.43577			2.71702	2.81275	3.44885	3.56463	5.26246	5.60692
	2.60256	2.95383	3.20198	3.17739	4.97782	5.43577			2.71702	2.81275	3.44885	3.56463	5.26246	5.60692
	2.58733	2.96008	3.17635	3.12869	4.94449	5.41582			2.71662	2.8065	3.43792	3.53077	5.28512	5.61918
	2.58733	2.96008	3.17635	3.12869	4.94449	5.41582			2.71662	2.8065	3.43792	3.53077	5.28512	5.61918
	2.62287	2.93775	3.19167	3.149	4.98564	5.44611			2.79084	2.8199	3.51198	3.60187	5.3471	5.66942
	2.62287	2.93775	3.19167	3.149	4.98564	5.44611			2.79084	2.8199	3.51198	3.60187	5.3471	5.66942
	2.63225	2.95517	3.21354	3.16775	5.00178	5.46101			2.77053	2.86633	3.50448	3.59328	5.34006	5.70476
	2.63225	2.95517	3.21354	3.16775	5.00178	5.46101			2.77053	2.86633	3.50448	3.59328	5.34006	5.70476
	2.6135	2.9632	3.17167	3.1313	4.99475	5.46654			2.81037	2.89133	3.51041	3.61385	5.39058	5.73216
	2.6135	2.9632	3.17167	3.1313	4.99475	5.46654			2.81037	2.89133	3.51041	3.61385	5.39058	5.73216
	2.6635	2.9824	3.21885	3.18025	5.01038	5.48385			2.8428	2.92258	3.57198	3.65057	5.44553	5.7574
	2.6635	2.9824	3.21885	3.18025	5.01038	5.48385			2.8428	2.92258	3.57198	3.65057	5.44553	5.7574
	2.63381	3.00249	3.21698	3.16619	5.00855	5.48409			2.80334	2.9132	3.57354	3.62557	5.44397	5.75428
	2.63381	3.00249	3.21698	3.16619	5.00855	5.48409			2.80334	2.9132	3.57354	3.62557	5.44397	5.75428
	2.6178	2.95829	3.20979	3.15994	5.01194	5.49346			2.82834	2.91633	3.58698	3.67609	5.46741	5.81822
	2.6178	2.95829	3.20979	3.15994	5.01194	5.49346			2.82834	2.91633	3.58698	3.67609	5.46741	5.81822
	2.6842	2.969	3.22823	3.1852	5.0497	5.51822			2.84748	2.9699	3.60791	3.71906	5.51949	5.84298
	2.6842	2.969	3.22823	3.1852	5.0497	5.51822			2.84748	2.9699	3.60791	3.71906	5.51949	5.84298
	2.62678	2.98642	3.23417	3.16072	5.02887	5.49586			2.84866	2.95561	3.59354	3.6865	5.50725	5.85452
	2.62678	2.98642	3.23417	3.16072	5.02887	5.49586			2.84866	2.95561	3.59354	3.6865	5.50725	5.85452
	2.6385	2.96409	3.24198	3.17218	5.05986	5.53384			2.92092	2.98642	3.6351	3.7438	5.5635	5.91389
	2.6385	2.96409	3.24198	3.17218	5.05986	5.53384			2.92092	2.98642	3.6351	3.7438	5.5635	5.91389
	2.66428	3.00561	3.26385	3.20786	5.08746	5.53168			2.92248	3.03642	3.64167	3.74275	5.56923	5.94202
	2.66428	3.00561	3.26385	3.20786	5.08746	5.53168			2.92248	3.03642	3.64167	3.74275	5.56923	5.94202
	2.62092	2.99445	3.25542	3.17687	5.06819	5.52928			2.92092	3.0132	3.66385	3.74666	5.60413	5.97663
	2.62092	2.99445	3.25542	3.17687	5.06819	5.52928			2.92092	3.0132	3.66385	3.74666	5.60413	5.97663
	2.67717	2.97436	3.26323	3.20968	5.06585	5.55957			2.99397	3.05606	3.71135	3.79275	5.67392	6.01966
	2.67717	2.97436	3.26323	3.20968	5.06585	5.55957			2.99397	3.05606	3.71135	3.79275	5.67392	6.01966
	2.66428	3.01365	3.26292	3.22869	5.08642	5.5687			2.95373	3.07168	3.70667	3.774	5.64944	6.02327
	2.66428	3.01365	3.26292	3.22869	5.08642	5.5687			2.95373	3.07168	3.70667	3.774	5.64944	6.02327
	2.64514	3.01097	3.25479	3.21671	5.09423	5.54851			3.00569	3.07392	3.71354	3.8076	5.68798	6.07976
	2.64514	3.01097	3.25479	3.21671	5.09423	5.54851			3.00569	3.07392	3.71354	3.8076	5.68798	6.07976
	2.73459	2.99534	3.28885	3.24718	5.11611	5.59274			3.02483	3.11231	3.76104	3.85656	5.75126	6.11413
	2.73459	2.99534	3.28885	3.24718	5.11611	5.59274			3.02483	3.11231	3.76104	3.85656	5.75126	6.11413
	2.67561	3.0065	3.27823	3.21828	5.11116	5.56654			3.01194	3.11767	3.76729	3.82374	5.73095	6.09611
	2.67561	3.0065	3.27823	3.21828	5.11116	5.56654			3.01194	3.11767	3.76729	3.82374	5.73095	6.09611
	2.68811	2.97481	3.27167	3.22244	5.11272	5.58144			3.06116	3.13284	3.79104	3.88911	5.78928	6.14635
	2.68811	2.97481	3.27167	3.22244	5.11272	5.58144			3.06116	3.13284	3.79104	3.88911	5.78928	6.14635
	2.73967	3.0257	3.3026	3.26463	5.13147	5.60572			3.06233	3.17927	3.80104	3.87687	5.80413	6.18889
	2.73967	3.0257	3.3026	3.26463	5.13147	5.60572			3.06233	3.17927	3.80104	3.87687	5.80413	6.18889
	2.67834	3.02481	3.28229	3.23416	5.14111	5.5901			3.07483	3.16409	3.80573	3.87166	5.81324	6.19707
	2.67834	3.02481	3.28229	3.23416	5.14111	5.5901			3.07483	3.16409	3.80573	3.87166	5.81324	6.19707
	2.72287	3.02436	3.31166	3.25057	5.15673	5.6175			3.14905	3.19177	3.86666	3.94536	5.85803	6.24707
	2.72287	3.02436	3.31166	3.25057	5.15673	5.6175			3.14905	3.19177	3.86666	3.94536	5.85803	6.24707
	2.71506	3.04267	3.30448	3.2602	5.16194	5.61317			3.09631	3.244	3.87823	3.92999	5.86897	6.26606
	2.71506	3.04267	3.30448	3.2602	5.16194	5.61317			3.09631	3.244	3.87823	3.92999	5.86897	6.26606
	2.68537	3.00293	3.29292	3.24458	5.14944	5.60163			3.13186	3.2574	3.89104	3.94067	5.91532	6.30043
	2.68537	3.00293	3.29292	3.24458	5.14944	5.60163			3.13186	3.2574	3.89104	3.94067	5.91532	6.30043
	2.7428	3.01275	3.33479	3.28078	5.16584	5.62543			3.1924	3.30472	3.9476	3.99484	5.95803	6.33553
	2.7428	3.01275	3.33479	3.28078	5.16584	5.62543			3.1924	3.30472	3.9476	3.99484	5.95803	6.33553
	2.70803	3.0199	3.32729	3.26567	5.1648	5.61293			3.15061	3.32838	3.94104	3.96124	5.95959	6.34514
	2.70803	3.0199	3.32729	3.26567	5.1648	5.61293			3.15061	3.32838	3.94104	3.96124	5.95959	6.34514
	2.70256	2.95918	3.33885	3.26775	5.17522	5.63529			3.20217	3.3199	3.97291	3.99562	5.98485	6.39298
	2.70256	2.95918	3.33885	3.26775	5.17522	5.63529			3.20217	3.3199	3.97291	3.99562	5.98485	6.39298
	2.73811	3.02213	3.36573	3.30317	5.20517	5.66053			3.21194	3.37258	3.9826	4.024	6.02965	6.4187
	2.73811	3.02213	3.36573	3.30317	5.20517	5.66053			3.21194	3.37258	3.9826	4.024	6.02965	6.4187
	2.68889	3.02392	3.35791	3.2688	5.17027	5.62303			3.19827	3.36097	3.99573	4.02375	6.03303	6.43553
	2.68889	3.02392	3.35791	3.2688	5.17027	5.62303			3.19827	3.36097	3.99573	4.02375	6.03303	6.43553
	2.72561	2.99624	3.37167	3.29666	5.18407	5.63769			3.29202	3.38374	4.02666	4.07895	6.10308	6.47663
	2.72561	2.99624	3.37167	3.29666	5.18407	5.63769			3.29202	3.38374	4.02666	4.07895	6.10308	6.47663
	2.7424	3.04043	3.37667	3.31359	5.20517	5.65524			3.26272	3.41365	4.03885	4.06177	6.11012	6.50187
	2.7424	3.04043	3.37667	3.31359	5.20517	5.65524			3.26272	3.41365	4.03885	4.06177	6.11012	6.50187
	2.69827	3.02793	3.36042	3.26697	5.18017	5.62856			3.2803	3.41454	4.06666	4.08885	6.14814	6.53841
	2.69827	3.02793	3.36042	3.26697	5.18017	5.62856			3.2803	3.41454	4.06666	4.08885	6.14814	6.53841
	2.751	3.03106	3.38541	3.30291	5.20543	5.68048			3.30998	3.4507	4.10417	4.1365	6.20022	6.56269
	2.751	3.03106	3.38541	3.30291	5.20543	5.68048			3.30998	3.4507	4.10417	4.1365	6.20022	6.56269
	2.7092	3.02927	3.3876	3.30031	5.22236	5.6663			3.28537	3.50517	4.11041	4.09562	6.20491	6.57808
	2.7092	3.02927	3.3876	3.30031	5.22236	5.6663			3.28537	3.50517	4.11041	4.09562	6.20491	6.57808
	2.70217	3.00561	3.37698	3.30343	5.23069	5.6824			3.31858	3.48686	4.14448	4.13442	6.25282	6.62976
	2.70217	3.00561	3.37698	3.30343	5.23069	5.6824			3.31858	3.48686	4.14448	4.13442	6.25282	6.62976
	2.74748	3.0074	3.4176	3.33781	5.24944	5.68553			3.35217	3.53061	4.16354	4.16802	6.29501	6.64683
	2.74748	3.0074	3.4176	3.33781	5.24944	5.68553			3.35217	3.53061	4.16354	4.16802	6.29501	6.64683
	2.71662	3.01811	3.39541	3.32062	5.22262	5.67231			3.32717	3.53954	4.17667	4.13677	6.30309	6.66846
	2.71662	3.01811	3.39541	3.32062	5.22262	5.67231			3.32717	3.53954	4.17667	4.13677	6.30309	6.66846
	2.71311	2.99356	3.43042	3.34145	5.24397	5.7074			3.38108	3.54311	4.22542	4.19614	6.35569	6.71173
	2.71311	2.99356	3.43042	3.34145	5.24397	5.7074			3.38108	3.54311	4.22542	4.19614	6.35569	6.71173
	2.74826	3.01767	3.42354	3.38364	5.27001	5.70163			3.39319	3.58954	4.23198	4.21359	6.35855	6.7437
	2.74826	3.01767	3.42354	3.38364	5.27001	5.70163			3.39319	3.58954	4.23198	4.21359	6.35855	6.7437
	2.69358	3.02838	3.4026	3.32817	5.22236	5.67423			3.38381	3.61499	4.23667	4.21593	6.39631	6.77014
	2.69358	3.02838	3.4026	3.32817	5.22236	5.67423			3.38381	3.61499	4.23667	4.21593	6.39631	6.77014
	2.76233	3.00338	3.4326	3.35213	5.26142	5.72447			3.43381	3.66767	4.28573	4.24666	6.44918	6.79683
	2.76233	3.00338	3.4326	3.35213	5.26142	5.72447			3.43381	3.66767	4.28573	4.24666	6.44918	6.79683
	2.73225	3.03106	3.42948	3.39197	5.26949	5.71966			3.41272	3.69356	4.29698	4.23651	6.44814	6.82327
	2.73225	3.03106	3.42948	3.39197	5.26949	5.71966			3.41272	3.69356	4.29698	4.23651	6.44814	6.82327
	2.71467	3.01856	3.41573	3.34458	5.26637	5.70043			3.45725	3.67168	4.32573	4.27479	6.50387	6.87519
	2.71467	3.01856	3.41573	3.34458	5.26637	5.70043			3.45725	3.67168	4.32573	4.27479	6.50387	6.87519
	2.77483	3.0315	3.46073	3.38755	5.29189	5.72255			3.49201	3.73284	4.36135	4.31411	6.5484	6.89058
	2.77483	3.0315	3.46073	3.38755	5.29189	5.72255			3.49201	3.73284	4.36135	4.31411	6.5484	6.89058
	2.73498	3.05159	3.45042	3.36385	5.27939	5.71269			3.4553	3.74892	4.3551	4.27557	6.55022	6.90837
	2.73498	3.05159	3.45042	3.36385	5.27939	5.71269			3.4553	3.74892	4.3551	4.27557	6.55022	6.90837
	2.73303	3.02615	3.45198	3.35369	5.28694	5.71486			3.5053	3.74356	4.39854	4.33703	6.56715	6.97832
	2.73303	3.02615	3.45198	3.35369	5.28694	5.71486			3.5053	3.74356	4.39854	4.33703	6.56715	6.97832
	2.76741	3.04177	3.48073	3.38624	5.32652	5.73673			3.51037	3.78151	4.41573	4.34328	6.60829	6.99731
	2.76741	3.04177	3.48073	3.38624	5.32652	5.73673			3.51037	3.78151	4.41573	4.34328	6.60829	6.99731
	2.70295	3.04267	3.4751	3.35057	5.301	5.70885			3.49084	3.78999	4.42885	4.349	6.64788	7.01798
	2.70295	3.04267	3.4751	3.35057	5.301	5.70885			3.49084	3.78999	4.42885	4.349	6.64788	7.01798
	2.7385	3.04177	3.47229	3.38703	5.3096	5.75163			3.55334	3.82972	4.47948	4.40499	6.70907	7.0562
	2.7385	3.04177	3.47229	3.38703	5.3096	5.75163			3.55334	3.82972	4.47948	4.40499	6.70907	7.0562
	2.75139	3.08106	3.47541	3.40083	5.32314	5.74923			3.53616	3.86409	4.4751	4.38989	6.69423	7.07327
	2.75139	3.08106	3.47541	3.40083	5.32314	5.74923			3.53616	3.86409	4.4751	4.38989	6.69423	7.07327
	2.70881	3.07749	3.47167	3.37348	5.31272	5.70163			3.53576	3.84713	4.47698	4.39718	6.72756	7.10187
	2.70881	3.07749	3.47167	3.37348	5.31272	5.70163			3.53576	3.84713	4.47698	4.39718	6.72756	7.10187
	2.751	3.07615	3.50917	3.39119	5.33199	5.72279			3.59123	3.8949	4.5401	4.43859	6.78512	7.12904
	2.751	3.07615	3.50917	3.39119	5.33199	5.72279			3.59123	3.8949	4.5401	4.43859	6.78512	7.12904
	2.71623	3.10695	3.49354	3.3826	5.32079	5.72303			3.54123	3.91677	4.53666	4.4365	6.77366	7.13841
	2.71623	3.10695	3.49354	3.3826	5.32079	5.72303			3.54123	3.91677	4.53666	4.4365	6.77366	7.13841
	2.72522	3.06677	3.50354	3.38312	5.33433	5.74418			3.59709	3.93329	4.58135	4.47062	6.82001	7.19611
	2.72522	3.06677	3.50354	3.38312	5.33433	5.74418			3.59709	3.93329	4.58135	4.47062	6.82001	7.19611
	2.7553	3.09311	3.51416	3.4188	5.35933	5.76197			3.58772	3.98731	4.58729	4.48364	6.86168	7.23625
	2.7553	3.09311	3.51416	3.4188	5.35933	5.76197			3.58772	3.98731	4.58729	4.48364	6.86168	7.23625
	2.69084	3.11856	3.51917	3.39536	5.33095	5.73144			3.58186	3.97347	4.57542	4.45421	6.86949	7.23673
	2.69084	3.11856	3.51917	3.39536	5.33095	5.73144			3.58186	3.97347	4.57542	4.45421	6.86949	7.23673
	2.73498	3.09713	3.50698	3.39926	5.34345	5.77038			3.64201	4.00249	4.62885	4.52296	6.91428	7.28072
	2.73498	3.09713	3.50698	3.39926	5.34345	5.77038			3.64201	4.00249	4.62885	4.52296	6.91428	7.28072
	2.76155	3.12615	3.52291	3.43703	5.37887	5.77086			3.64436	4.03552	4.63292	4.50942	6.92183	7.29803
	2.76155	3.12615	3.52291	3.43703	5.37887	5.77086			3.64436	4.03552	4.63292	4.50942	6.92183	7.29803
	2.71897	3.11142	3.50448	3.40812	5.34293	5.74226			3.66233	4.05249	4.64323	4.50812	6.98043	7.33985
	2.71897	3.11142	3.50448	3.40812	5.34293	5.74226			3.66233	4.05249	4.64323	4.50812	6.98043	7.33985
	2.77834	3.09088	3.54417	3.44458	5.36793	5.76558			3.69944	4.09267	4.69198	4.56932	7.02183	7.36389
	2.77834	3.09088	3.54417	3.44458	5.36793	5.76558			3.69944	4.09267	4.69198	4.56932	7.02183	7.36389
	2.75295	3.08641	3.53292	3.44119	5.37157	5.76534			3.68655	4.09267	4.68542	4.55031	7.02392	7.36365
	2.75295	3.08641	3.53292	3.44119	5.37157	5.76534			3.68655	4.09267	4.68542	4.55031	7.02392	7.36365
	2.72717	3.07213	3.52073	3.42348	5.36454	5.75957			3.73342	4.08106	4.70698	4.57218	7.06741	7.42087
	2.72717	3.07213	3.52073	3.42348	5.36454	5.75957			3.73342	4.08106	4.70698	4.57218	7.06741	7.42087
	2.77483	3.09892	3.56479	3.47166	5.39084	5.77495			3.77248	4.14177	4.73698	4.60916	7.12366	7.46053
	2.77483	3.09892	3.56479	3.47166	5.39084	5.77495			3.77248	4.14177	4.73698	4.60916	7.12366	7.46053
	2.75217	3.09936	3.54885	3.44406	5.37782	5.75836			3.75608	4.14981	4.73479	4.59302	7.10829	7.44995
	2.75217	3.09936	3.54885	3.44406	5.37782	5.75836			3.75608	4.14981	4.73479	4.59302	7.10829	7.44995
	2.73967	3.07883	3.53573	3.44744	5.3872	5.78649			3.80412	4.14445	4.7601	4.63833	7.16038	7.49274
	2.73967	3.07883	3.53573	3.44744	5.3872	5.78649			3.80412	4.14445	4.7601	4.63833	7.16038	7.49274
	2.77522	3.12749	3.58573	3.49458	5.40439	5.79731			3.78577	4.17659	4.78854	4.63729	7.19006	7.51822
	2.77522	3.12749	3.58573	3.49458	5.40439	5.79731			3.78577	4.17659	4.78854	4.63729	7.19006	7.51822
	2.73889	3.11231	3.55417	3.44119	5.40439	5.79178			3.78498	4.18374	4.76073	4.65499	7.21324	7.53841
	2.73889	3.11231	3.55417	3.44119	5.40439	5.79178			3.78498	4.18374	4.76073	4.65499	7.21324	7.53841
	2.7967	3.10695	3.5801	3.46723	5.42834	5.81317			3.85295	4.22392	4.80792	4.70083	7.27939	7.55404
	2.7967	3.10695	3.5801	3.46723	5.42834	5.81317			3.85295	4.22392	4.80792	4.70083	7.27939	7.55404
	2.76858	3.1315	3.57948	3.48025	5.43798	5.8187			3.81819	4.27168	4.81635	4.69301	7.2609	7.59033
	2.76858	3.1315	3.57948	3.48025	5.43798	5.8187			3.81819	4.27168	4.81635	4.69301	7.2609	7.59033
	2.75452	3.12972	3.56823	3.47244	5.41298	5.78625			3.8674	4.28061	4.82948	4.70031	7.30595	7.63433
	2.75452	3.12972	3.56823	3.47244	5.41298	5.78625			3.8674	4.28061	4.82948	4.70031	7.30595	7.63433
	2.8217	3.09624	3.60448	3.50369	5.42835	5.81149			3.89826	4.31901	4.84479	4.7464	7.35256	7.66125
	2.8217	3.09624	3.60448	3.50369	5.42835	5.81149			3.89826	4.31901	4.84479	4.7464	7.35256	7.66125
	2.7885	3.13106	3.59698	3.50994	5.41949	5.80332			3.85491	4.34222	4.83792	4.72583	7.35439	7.66774
	2.7885	3.13106	3.59698	3.50994	5.41949	5.80332			3.85491	4.34222	4.83792	4.72583	7.35439	7.66774
	2.7885	3.09668	3.59135	3.48442	5.44215	5.79418			3.92678	4.35695	4.87104	4.74796	7.39631	7.71774
	2.7885	3.09668	3.59135	3.48442	5.44215	5.79418			3.92678	4.35695	4.87104	4.74796	7.39631	7.71774
	2.82092	3.13999	3.6276	3.52557	5.45517	5.81293			3.91662	4.40025	4.89823	4.76463	7.42131	7.72687
	2.82092	3.13999	3.6276	3.52557	5.45517	5.81293			3.91662	4.40025	4.89823	4.76463	7.42131	7.72687
	2.7635	3.1574	3.60979	3.48338	5.43772	5.79562			3.91467	4.38552	4.8726	4.76619	7.44762	7.73337
	2.7635	3.1574	3.60979	3.48338	5.43772	5.79562			3.91467	4.38552	4.8726	4.76619	7.44762	7.73337
	2.76155	3.11722	3.62885	3.51697	5.46038	5.83433			3.99514	4.43195	4.9301	4.80708	7.49605	7.76654
	2.76155	3.11722	3.62885	3.51697	5.46038	5.83433			3.99514	4.43195	4.9301	4.80708	7.49605	7.76654
	2.79983	3.14713	3.62167	3.51958	5.46767	5.8413			3.93772	4.47749	4.93167	4.8188	7.48798	7.79779
	2.79983	3.14713	3.62167	3.51958	5.46767	5.8413			3.93772	4.47749	4.93167	4.8188	7.48798	7.79779
	2.77756	3.12838	3.61635	3.49848	5.44918	5.81774			3.93967	4.44758	4.94542	4.81567	7.5346	7.8288
	2.77756	3.12838	3.61635	3.49848	5.44918	5.81774			3.93967	4.44758	4.94542	4.81567	7.5346	7.8288
	2.82678	3.15204	3.6526	3.54067	5.45803	5.84178			4.0092	4.47659	4.97854	4.86697	7.5872	7.87327
	2.82678	3.15204	3.6526	3.54067	5.45803	5.84178			4.0092	4.47659	4.97854	4.86697	7.5872	7.87327
	2.78928	3.15115	3.63292	3.51619	5.45777	5.85187			3.95334	4.49133	4.98479	4.83416	7.58798	7.88048
	2.78928	3.15115	3.63292	3.51619	5.45777	5.85187			3.95334	4.49133	4.98479	4.83416	7.58798	7.88048
	2.79045	3.13284	3.64979	3.51932	5.47939	5.83192			4.02248	4.48686	4.99823	4.87609	7.63616	7.92663
	2.79045	3.13284	3.64979	3.51932	5.47939	5.83192			4.02248	4.48686	4.99823	4.87609	7.63616	7.92663
	2.8303	3.12838	3.67323	3.56645	5.51116	5.84851			4.01233	4.52436	5.00323	4.89562	7.66454	7.96077
	2.8303	3.12838	3.67323	3.56645	5.51116	5.84851			4.01233	4.52436	5.00323	4.89562	7.66454	7.96077
	2.77522	3.14534	3.65292	3.52895	5.46949	5.81245			4.00764	4.51677	5.00917	4.86072	7.68069	7.95885
	2.77522	3.14534	3.65292	3.52895	5.46949	5.81245			4.00764	4.51677	5.00917	4.86072	7.68069	7.95885
	2.81233	3.1132	3.67042	3.53104	5.49736	5.85428			4.10295	4.52034	5.06448	4.92114	7.72079	8.01053
	2.81233	3.1132	3.67042	3.53104	5.49736	5.85428			4.10295	4.52034	5.06448	4.92114	7.72079	8.01053
	2.84084	3.16945	3.68698	3.55395	5.52288	5.85139			4.07444	4.56409	5.05823	4.93859	7.70413	8.01822
	2.84084	3.16945	3.68698	3.55395	5.52288	5.85139			4.07444	4.56409	5.05823	4.93859	7.70413	8.01822
	2.77014	3.13463	3.6726	3.52713	5.48225	5.82663			4.08694	4.57392	5.06573	4.9464	7.74241	8.04779
	2.77014	3.13463	3.6726	3.52713	5.48225	5.82663			4.08694	4.57392	5.06573	4.9464	7.74241	8.04779
	2.82131	3.1315	3.70635	3.55005	5.50517	5.85716			4.13733	4.60026	5.1151	4.97505	7.80256	8.07591
	2.82131	3.1315	3.70635	3.55005	5.50517	5.85716			4.13733	4.60026	5.1151	4.97505	7.80256	8.07591
	2.80686	3.16811	3.68916	3.56932	5.4971	5.8651			4.09944	4.64267	5.09229	4.94536	7.7846	8.07591
	2.80686	3.16811	3.68916	3.56932	5.4971	5.8651			4.09944	4.64267	5.09229	4.94536	7.7846	8.07591
	2.826	3.14356	3.69479	3.53702	5.48798	5.85548			4.15686	4.65651	5.12698	4.97713	7.83095	8.13937
	2.826	3.14356	3.69479	3.53702	5.48798	5.85548			4.15686	4.65651	5.12698	4.97713	7.83095	8.13937
	2.86545	3.16767	3.7401	3.58051	5.5221	5.85236			4.18537	4.69401	5.13854	5.0188	7.88251	8.15572
	2.86545	3.16767	3.7401	3.58051	5.5221	5.85236			4.18537	4.69401	5.13854	5.0188	7.88251	8.15572
	2.83459	3.16231	3.71542	3.55317	5.50491	5.83697			4.1678	4.70293	5.13854	4.99927	7.88199	8.16293
	2.83459	3.16231	3.71542	3.55317	5.50491	5.83697			4.1678	4.70293	5.13854	4.99927	7.88199	8.16293
	2.84162	3.1507	3.7201	3.55317	5.5122	5.8788			4.23733	4.69981	5.16292	5.03416	7.91194	8.1913
	2.84162	3.1507	3.7201	3.55317	5.5122	5.8788			4.23733	4.69981	5.16292	5.03416	7.91194	8.1913
	2.86311	3.17615	3.75542	3.56489	5.5471	5.86389			4.22639	4.71677	5.15542	5.04302	7.926	8.21197
	2.86311	3.17615	3.75542	3.56489	5.5471	5.86389			4.22639	4.71677	5.15542	5.04302	7.926	8.21197
	2.81702	3.17168	3.74354	3.5352	5.49579	5.85957			4.23264	4.73017	5.16354	5.04562	7.95178	8.22663
	2.81702	3.17168	3.74354	3.5352	5.49579	5.85957			4.23264	4.73017	5.16354	5.04562	7.95178	8.22663
	2.88147	3.15204	3.76135	3.5813	5.51454	5.88168			4.30061	4.75204	5.19573	5.09197	8.00621	8.27303
	2.88147	3.15204	3.76135	3.5813	5.51454	5.88168			4.30061	4.75204	5.19573	5.09197	8.00621	8.27303
	2.86858	3.17704	3.7651	3.60083	5.54658	5.88144			4.26116	4.75249	5.20542	5.06906	8.0023	8.25909
	2.86858	3.17704	3.7651	3.60083	5.54658	5.88144			4.26116	4.75249	5.20542	5.06906	8.0023	8.25909
	2.86897	3.15517	3.72916	3.56645	5.52001	5.85764			4.25881	4.75204	5.20792	5.06671	8.03902	8.31005
	2.86897	3.15517	3.72916	3.56645	5.52001	5.85764			4.25881	4.75204	5.20792	5.06671	8.03902	8.31005
	2.89788	3.14267	3.78667	3.59796	5.53954	5.8824			4.31272	4.81677	5.25573	5.12296	8.08642	8.33961
	2.89788	3.14267	3.78667	3.59796	5.53954	5.8824			4.31272	4.81677	5.25573	5.12296	8.08642	8.33961
	2.87365	3.15829	3.78823	3.57817	5.52652	5.86558			4.2678	4.81811	5.23417	5.09432	8.09111	8.33625
	2.87365	3.15829	3.78823	3.57817	5.52652	5.86558			4.2678	4.81811	5.23417	5.09432	8.09111	8.33625
	2.85334	3.13642	3.78354	3.5977	5.53173	5.87279			4.35061	4.82883	5.26479	5.1451	8.11246	8.3925
	2.85334	3.13642	3.78354	3.5977	5.53173	5.87279			4.35061	4.82883	5.26479	5.1451	8.11246	8.3925
	2.90412	3.18284	3.79323	3.6227	5.56038	5.87832			4.35608	4.84356	5.29104	5.14927	8.13668	8.39178
	2.90412	3.18284	3.79323	3.6227	5.56038	5.87832			4.35608	4.84356	5.29104	5.14927	8.13668	8.39178
	2.85959	3.18999	3.76948	3.57973	5.53199	5.85211			4.3342	4.84534	5.28198	5.1313	8.17079	8.42087
	2.85959	3.18999	3.76948	3.57973	5.53199	5.85211			4.3342	4.84534	5.28198	5.1313	8.17079	8.42087
	2.87834	3.15383	3.80292	3.62687	5.57105	5.88096			4.39944	4.87213	5.30604	5.17088	8.20907	8.46341
	2.87834	3.15383	3.80292	3.62687	5.57105	5.88096			4.39944	4.87213	5.30604	5.17088	8.20907	8.46341
	2.88459	3.16767	3.79948	3.62817	5.58381	5.87471			4.37209	4.91142	5.31479	5.17453	8.20777	8.4687
	2.88459	3.16767	3.79948	3.62817	5.58381	5.87471			4.37209	4.91142	5.31479	5.17453	8.20777	8.4687
	2.86311	3.16945	3.7926	3.60031	5.54423	5.86534			4.39866	4.88909	5.32667	5.19145	8.24241	8.4913
	2.86311	3.16945	3.7926	3.60031	5.54423	5.86534			4.39866	4.88909	5.32667	5.19145	8.24241	8.4913
	2.92405	3.16275	3.80417	3.6365	5.57756	5.87159			4.45959	4.92034	5.37792	5.22947	8.28303	8.50813
	2.92405	3.16275	3.80417	3.6365	5.57756	5.87159			4.45959	4.92034	5.37792	5.22947	8.28303	8.50813
	2.88694	3.19401	3.80573	3.61802	5.55387	5.87711			4.43303	4.94445	5.36729	5.19406	8.26428	8.5211
	2.88694	3.19401	3.80573	3.61802	5.55387	5.87711			4.43303	4.94445	5.36729	5.19406	8.26428	8.5211
	2.87873	3.16767	3.78854	3.58963	5.57314	5.88216			4.46233	4.95115	5.36729	5.22453	8.30803	8.54995
	2.87873	3.16767	3.78854	3.58963	5.57314	5.88216			4.46233	4.95115	5.36729	5.22453	8.30803	8.54995
	2.89709	3.17168	3.8326	3.63494	5.59788	5.89707			4.49045	4.97347	5.4026	5.24744	8.33329	8.57062
	2.89709	3.17168	3.8326	3.63494	5.59788	5.89707			4.49045	4.97347	5.4026	5.24744	8.33329	8.57062
	2.84905	3.18775	3.81198	3.60343	5.57288	5.85692			4.45647	4.9824	5.40104	5.22453	8.34683	8.5776
	2.84905	3.18775	3.81198	3.60343	5.57288	5.85692			4.45647	4.9824	5.40104	5.22453	8.34683	8.5776
	2.89201	3.15338	3.80854	3.60838	5.58564	5.8937			4.51233	4.97436	5.45198	5.27817	8.38928	8.62135
	2.89201	3.15338	3.80854	3.60838	5.58564	5.8937			4.51233	4.97436	5.45198	5.27817	8.38928	8.62135
	2.91428	3.17615	3.83135	3.65369	5.60855	5.88745			4.50725	5.00249	5.43542	5.25864	8.41246	8.61005
	2.91428	3.17615	3.83135	3.65369	5.60855	5.88745			4.50725	5.00249	5.43542	5.25864	8.41246	8.61005
	2.88967	3.15517	3.83073	3.60499	5.58355	5.85332			4.51936	5.01901	5.42854	5.25604	8.45022	8.66149
	2.88967	3.15517	3.83073	3.60499	5.58355	5.85332			4.51936	5.01901	5.42854	5.25604	8.45022	8.66149
	2.93342	3.14222	3.83573	3.65031	5.59579	5.86462			4.56506	5.02124	5.47885	5.30005	8.47262	8.66606
	2.93342	3.14222	3.83573	3.65031	5.59579	5.86462			4.56506	5.02124	5.47885	5.30005	8.47262	8.66606
	2.90647	3.1757	3.83604	3.65187	5.61376	5.87062			4.53811	5.05606	5.46417	5.28781	8.47366	8.66798
	2.90647	3.1757	3.83604	3.65187	5.61376	5.87062			4.53811	5.05606	5.46417	5.28781	8.47366	8.66798
	2.86975	3.16186	3.84104	3.6227	5.59371	5.87183			4.55256	5.05829	5.48354	5.29744	8.51038	8.71149
	2.86975	3.16186	3.84104	3.6227	5.59371	5.87183			4.55256	5.05829	5.48354	5.29744	8.51038	8.71149
	2.95217	3.18329	3.85948	3.67062	5.62105	5.88288			4.57991	5.10293	5.5001	5.35213	8.52548	8.72567
	2.95217	3.18329	3.85948	3.67062	5.62105	5.88288			4.57991	5.10293	5.5001	5.35213	8.52548	8.72567
	2.90686	3.1699	3.85479	3.64015	5.59553	5.87567			4.55217	5.11275	5.50948	5.33156	8.53642	8.73096
	2.90686	3.1699	3.85479	3.64015	5.59553	5.87567			4.55217	5.11275	5.50948	5.33156	8.53642	8.73096
	2.91233	3.14534	3.85948	3.63572	5.59683	5.88264			4.62678	5.11008	5.53885	5.36229	8.56532	8.78361
	2.91233	3.14534	3.85948	3.63572	5.59683	5.88264			4.62678	5.11008	5.53885	5.36229	8.56532	8.78361
	2.97522	3.16186	3.87948	3.67192	5.63069	5.87711			4.60256	5.15517	5.54229	5.37348	8.58902	8.79875
	2.97522	3.16186	3.87948	3.67192	5.63069	5.87711			4.60256	5.15517	5.54229	5.37348	8.58902	8.79875
	2.91194	3.15293	3.85948	3.62791	5.59683	5.84731			4.61311	5.14088	5.55229	5.36697	8.60569	8.79394
	2.91194	3.15293	3.85948	3.62791	5.59683	5.84731			4.61311	5.14088	5.55229	5.36697	8.60569	8.79394
	2.97873	3.16543	3.87854	3.65447	5.61923	5.88601			4.67483	5.16811	5.57542	5.40942	8.65881	8.82375
	2.97873	3.16543	3.87854	3.65447	5.61923	5.88601			4.67483	5.16811	5.57542	5.40942	8.65881	8.82375
	2.93069	3.18865	3.8726	3.6714	5.63095	5.86798			4.62444	5.18954	5.59698	5.39223	8.64475	8.81077
	2.93069	3.18865	3.8726	3.6714	5.63095	5.86798			4.62444	5.18954	5.59698	5.39223	8.64475	8.81077
	2.9178	3.16677	3.85917	3.65083	5.60777	5.8413			4.65295	5.1882	5.59042	5.40552	8.66142	8.86173
	2.9178	3.16677	3.85917	3.65083	5.60777	5.8413			4.65295	5.1882	5.59042	5.40552	8.66142	8.86173
	2.96233	3.17883	3.90198	3.66697	5.62496	5.8675			4.69826	5.23284	5.63448	5.46072	8.70491	8.88457
	2.96233	3.17883	3.90198	3.66697	5.62496	5.8675			4.69826	5.23284	5.63448	5.46072	8.70491	8.88457
	2.91701	3.17838	3.8901	3.66932	5.59058	5.8562			4.64944	5.26945	5.59917	5.40942	8.6859	8.89058
	2.91701	3.17838	3.8901	3.66932	5.59058	5.8562			4.64944	5.26945	5.59917	5.40942	8.6859	8.89058
	2.92639	3.14267	3.87979	3.65213	5.6109	5.87615			4.69983	5.26543	5.61698	5.46046	8.71923	8.92423
	2.92639	3.14267	3.87979	3.65213	5.6109	5.87615			4.69983	5.26543	5.61698	5.46046	8.71923	8.92423
	2.93928	3.15561	3.90104	3.71072	5.63564	5.87327			4.68108	5.28731	5.62979	5.47374	8.73954	8.95885
	2.93928	3.15561	3.90104	3.71072	5.63564	5.87327			4.68108	5.28731	5.62979	5.47374	8.73954	8.95885
	2.88811	3.18329	3.89729	3.66932	5.62236	5.8276			4.67561	5.27213	5.63823	5.4576	8.74449	8.92591
	2.88811	3.18329	3.89729	3.66932	5.62236	5.8276			4.67561	5.27213	5.63823	5.4576	8.74449	8.92591
	2.93928	3.1507	3.91792	3.68416	5.62574	5.84947			4.76545	5.29222	5.67448	5.49041	8.78069	8.96245
	2.93928	3.1507	3.91792	3.68416	5.62574	5.84947			4.76545	5.29222	5.67448	5.49041	8.78069	8.96245
	2.94748	3.17615	3.90479	3.70161	5.65178	5.86413			4.71389	5.33106	5.69167	5.47947	8.79111	8.9663
	2.94748	3.17615	3.90479	3.70161	5.65178	5.86413			4.71389	5.33106	5.69167	5.47947	8.79111	8.9663
	2.90803	3.15561	3.90823	3.66046	5.61923	5.83361			4.74084	5.32168	5.6926	5.48833	8.80308	8.98385
	2.90803	3.15561	3.90823	3.66046	5.61923	5.83361			4.74084	5.32168	5.6926	5.48833	8.80308	8.98385
	2.93655	3.15517	3.90604	3.70317	5.64058	5.84755			4.78733	5.34356	5.73323	5.52661	8.84709	9.0199
	2.93655	3.15517	3.90604	3.70317	5.64058	5.84755			4.78733	5.34356	5.73323	5.52661	8.84709	9.0199
	2.92131	3.18463	3.91479	3.67583	5.63069	5.84899			4.76272	5.35517	5.71479	5.50551	8.83251	9.00668
	2.92131	3.18463	3.91479	3.67583	5.63069	5.84899			4.76272	5.35517	5.71479	5.50551	8.83251	9.00668
	2.91194	3.17079	3.90198	3.67869	5.64944	5.84394			4.79826	5.34579	5.74354	5.52661	8.86064	9.05836
	2.91194	3.17079	3.90198	3.67869	5.64944	5.84394			4.79826	5.34579	5.74354	5.52661	8.86064	9.05836
	2.95022	3.17258	3.93604	3.71411	5.65334	5.86125			4.82912	5.3699	5.75854	5.56046	8.88564	9.05404
	2.95022	3.17258	3.93604	3.71411	5.65334	5.86125			4.82912	5.3699	5.75854	5.56046	8.88564	9.05404
	2.91858	3.20918	3.91198	3.69041	5.62782	5.84418			4.79358	5.39222	5.74979	5.52583	8.88355	9.05452
	2.91858	3.20918	3.91198	3.69041	5.62782	5.84418			4.79358	5.39222	5.74979	5.52583	8.88355	9.05452
	2.91662	3.13418	3.9176	3.70161	5.63902	5.88385			4.85998	5.40695	5.8001	5.57817	8.91923	9.10644
	2.91662	3.13418	3.9176	3.70161	5.63902	5.88385			4.85998	5.40695	5.8001	5.57817	8.91923	9.10644
	2.92522	3.19311	3.9251	3.72374	5.66246	5.86582			5.87092	6.43999	6.31979	6.06749	9.4346	9.62663
	2.92522	3.19311	3.9251	3.72374	5.66246	5.86582			5.87092	6.43999	6.31979	6.06749	9.4346	9.62663
	2.89319	3.19579	3.91323	3.68025	5.62678	5.85764			10.158	11.2337	7.91854	7.66176	11.1492	11.381
	2.89319	3.19579	3.91323	3.68025	5.62678	5.85764			10.158	11.2337	7.91854	7.66176	11.1492	11.381
	2.92014	3.19847	3.92698	3.70083	5.65777	5.88144			9.77053	11.7623	7.57573	7.34354	10.5364	10.7706
	2.92014	3.19847	3.92698	3.70083	5.65777	5.88144			9.77053	11.7623	7.57573	7.34354	10.5364	10.7706
	2.88498	3.21811	3.94104	3.71671	5.6596	5.85548			7.94826	10.0583	6.96198	6.74822	9.77053	9.98577
	2.88498	3.21811	3.94104	3.71671	5.6596	5.85548			7.94826	10.0583	6.96198	6.74822	9.77053	9.98577
	2.8553	3.19579	3.92198	3.67505	5.64475	5.83312			6.61155	8.45338	6.53135	6.31776	9.21246	9.43264
	2.8553	3.19579	3.92198	3.67505	5.64475	5.83312			6.61155	8.45338	6.53135	6.31776	9.21246	9.43264
	2.94592	3.18731	3.96448	3.74171	5.6609	5.85332			3.65608	5.34713	5.12823	5.01828	7.73225	7.9062
	2.94592	3.18731	3.96448	3.74171	5.6609	5.85332			3.65608	5.34713	5.12823	5.01828	7.73225	7.9062
	2.88733	3.20338	3.93166	3.7102	5.62548	5.83024			-4.99744	-4.56582	1.7726	1.66515	4.27939	4.30067
	2.88733	3.20338	3.93166	3.7102	5.62548	5.83024			-4.99744	-4.56582	1.7726	1.66515	4.27939	4.30067
	2.8928	3.18909	3.94417	3.69926	5.65126	5.84058			-4.39509	-5.89974	2.51729	2.32739	5.55699	5.56822
	2.8928	3.18909	3.94417	3.69926	5.65126	5.84058			-4.39509	-5.89974	2.51729	2.32739	5.55699	5.56822
	2.92795	3.19668	3.96167	3.72791	5.67626	5.85788			-1.14587	-2.95823	3.6776	3.44718	7.00387	7.08144
	2.92795	3.19668	3.96167	3.72791	5.67626	5.85788			-1.14587	-2.95823	3.6776	3.44718	7.00387	7.08144
	2.88342	3.21142	3.94323	3.71281	5.61663	5.82712			1.38381	-0.0680471	4.53667	4.28833	8.18329	8.26077
	2.88342	3.21142	3.94323	3.71281	5.61663	5.82712			1.38381	-0.0680471	4.53667	4.28833	8.18329	8.26077
	2.91741	3.20606	3.9876	3.70083	5.65309	5.84851			4.33928	3.15249	5.85698	5.56828	9.72965	9.83601
	2.91741	3.20606	3.9876	3.70083	5.65309	5.84851			4.33928	3.15249	5.85698	5.56828	9.72965	9.83601
	2.90608	3.21186	3.96166	3.7326	5.66298	5.85332			9.54631	9.44445	8.04979	7.77869	11.876	12.1278
	2.90608	3.21186	3.96166	3.7326	5.66298	5.85332			9.54631	9.44445	8.04979	7.77869	11.876	12.1278
	2.87209	3.19847	3.93979	3.68781	5.64163	5.83			9.24162	10.3087	7.51854	7.28755	10.9226	11.1721
	2.87209	3.19847	3.93979	3.68781	5.64163	5.83			9.24162	10.3087	7.51854	7.28755	10.9226	11.1721
	2.91936	3.17258	3.9851	3.74926	5.66012	5.84514			7.53889	8.91945	6.86792	6.67244	10.1343	10.3252
	2.91936	3.17258	3.9851	3.74926	5.66012	5.84514			7.53889	8.91945	6.86792	6.67244	10.1343	10.3252
	2.91194	3.20159	3.99604	3.72218	5.66845	5.85837			6.31233	7.55517	6.4701	6.22036	9.68173	9.83961
	2.91194	3.20159	3.99604	3.72218	5.66845	5.85837			6.31233	7.55517	6.4701	6.22036	9.68173	9.83961
	2.91155	3.19579	3.97448	3.70552	5.66767	5.84202			5.70334	6.7199	6.2476	6.01359	9.42131	9.57471
	2.91155	3.19579	3.97448	3.70552	5.66767	5.84202			5.70334	6.7199	6.2476	6.01359	9.42131	9.57471
	2.94475	3.21097	3.99635	3.75239	5.67965	5.84154			5.35373	6.2574	6.10135	5.8839	9.23095	9.36365
	2.94475	3.21097	3.99635	3.75239	5.67965	5.84154			5.35373	6.2574	6.10135	5.8839	9.23095	9.36365
	2.92209	3.20561	3.98917	3.71828	5.64736	5.82687			5.09162	5.91722	5.98385	5.74848	9.10959	9.21606
	2.92209	3.20561	3.98917	3.71828	5.64736	5.82687			5.09162	5.91722	5.98385	5.74848	9.10959	9.21606
	2.94006	3.18865	3.99229	3.72973	5.66975	5.85115			4.99904	5.72704	5.9551	5.73182	9.07965	9.21966
	2.94006	3.18865	3.99229	3.72973	5.66975	5.85115			4.99904	5.72704	5.9551	5.73182	9.07965	9.21966
	2.94514	3.21499	4.00823	3.73703	5.69032	5.83721			4.90803	5.60115	5.91229	5.68807	9.12131	9.25981
	2.94514	3.21499	4.00823	3.73703	5.69032	5.83721			4.90803	5.60115	5.91229	5.68807	9.12131	9.25981
	2.89905	3.19624	3.97479	3.71567	5.6635	5.82231			4.91428	5.52079	5.92479	5.65291	9.21116	9.34322
	2.89905	3.19624	3.97479	3.71567	5.6635	5.82231			4.91428	5.52079	5.92479	5.65291	9.21116	9.34322
	2.97366	3.19267	4.01448	3.73963	5.67991	5.85572			4.97991	5.52258	5.96948	5.72583	9.29944	9.43192
	2.97366	3.19267	4.01448	3.73963	5.67991	5.85572			4.97991	5.52258	5.96948	5.72583	9.29944	9.43192
	2.92639	3.19267	3.98104	3.73286	5.66142	5.83625			4.99475	5.56633	6.00229	5.70734	9.3234	9.44899
	2.92639	3.19267	3.98104	3.73286	5.66142	5.83625			4.99475	5.56633	6.00229	5.70734	9.3234	9.44899
	2.92209	3.15829	3.99729	3.71593	5.65725	5.83529			5.09123	5.5891	6.04885	5.78755	9.3497	9.50644
	2.92209	3.15829	3.99729	3.71593	5.65725	5.83529			5.09123	5.5891	6.04885	5.78755	9.3497	9.50644
	2.97053	3.16677	4.01729	3.74406	5.69553	5.85043			5.14123	5.70963	6.09104	5.84588	9.33329	9.47952
	2.97053	3.16677	4.01729	3.74406	5.69553	5.85043			5.14123	5.70963	6.09104	5.84588	9.33329	9.47952
	2.89748	3.19713	3.99635	3.7076	5.651	5.83697			5.11155	5.72302	6.11135	5.82557	9.29397	9.41558
	2.89748	3.19713	3.99635	3.7076	5.651	5.83697			5.11155	5.72302	6.11135	5.82557	9.29397	9.41558
	2.92522	3.15338	4.00854	3.7438	5.65933	5.85764			5.19358	5.77124	6.14979	5.8852	9.30803	9.43841
	2.92522	3.15338	4.00854	3.7438	5.65933	5.85764			5.19358	5.77124	6.14979	5.8852	9.30803	9.43841
	2.9467	3.19133	4.04073	3.77322	5.69397	5.83264			5.1885	5.83284	6.15135	5.8964	9.30334	9.43889
	2.9467	3.19133	4.04073	3.77322	5.69397	5.83264			5.1885	5.83284	6.15135	5.8964	9.30334	9.43889
	2.89866	3.19133	4.00479	3.70421	5.651	5.79731			5.16506	5.81499	6.15666	5.88989	9.34058	9.45043
	2.89866	3.19133	4.00479	3.70421	5.651	5.79731			5.16506	5.81499	6.15666	5.88989	9.34058	9.45043
	2.94006	3.17347	4.03135	3.73051	5.6859	5.81606			5.18654	5.81767	6.16073	5.89901	9.39319	9.49226
	2.94006	3.17347	4.03135	3.73051	5.6859	5.81606			5.18654	5.81767	6.16073	5.89901	9.39319	9.49226
	2.94553	3.19222	4.01167	3.76281	5.69788	5.82808			5.12717	5.81856	6.15573	5.8839	9.38121	9.48913
	2.94553	3.19222	4.01167	3.76281	5.69788	5.82808			5.12717	5.81856	6.15573	5.8839	9.38121	9.48913
	2.92014	3.16633	3.97917	3.72739	5.67288	5.80572			5.14123	5.76008	6.15104	5.88729	9.41012	9.5288
	2.92014	3.16633	3.97917	3.72739	5.67288	5.80572			5.14123	5.76008	6.15104	5.88729	9.41012	9.5288
	2.9428	3.17347	4.03104	3.77114	5.68173	5.8324			5.16155	5.77525	6.17292	5.91229	9.426	9.54082
	2.9428	3.17347	4.03104	3.77114	5.68173	5.8324			5.16155	5.77525	6.17292	5.91229	9.426	9.54082
	2.90373	3.18642	3.99666	3.74067	5.66611	5.80452			5.09358	5.74534	6.16292	5.87218	9.41324	9.51005
	2.90373	3.18642	3.99666	3.74067	5.66611	5.80452			5.09358	5.74534	6.16292	5.87218	9.41324	9.51005
	2.92756	3.16097	4.01354	3.74354	5.66532	5.82471			5.17053	5.74892	6.19042	5.9063	9.43043	9.53096
	2.92756	3.16097	4.01354	3.74354	5.66532	5.82471			5.17053	5.74892	6.19042	5.9063	9.43043	9.53096
	2.93381	3.18686	4.02667	3.76749	5.69866	5.82399			5.16584	5.77927	6.20104	5.93807	9.43564	9.53
	2.93381	3.18686	4.02667	3.76749	5.69866	5.82399			5.16584	5.77927	6.20104	5.93807	9.43564	9.53
	2.87913	3.17704	4.02792	3.74041	5.66689	5.80019			5.16389	5.75026	6.19323	5.91619	9.42809	9.53024
	2.87913	3.17704	4.02792	3.74041	5.66689	5.80019			5.16389	5.75026	6.19323	5.91619	9.42809	9.53024
	2.9053	3.15874	4.03948	3.75447	5.67262	5.8288			5.21389	5.79624	6.25135	5.95838	9.46871	9.54178
	2.9053	3.15874	4.03948	3.75447	5.67262	5.8288			5.21389	5.79624	6.25135	5.95838	9.46871	9.54178
	2.90412	3.19088	4.03448	3.77114	5.68668	5.82423			5.14123	5.81633	6.24792	5.9589	9.47262	9.5526
	2.90412	3.19088	4.03448	3.77114	5.68668	5.82423			5.14123	5.81633	6.24792	5.9589	9.47262	9.5526
	2.89045	3.18508	4.00448	3.71333	5.6497	5.79082			5.17209	5.79713	6.25198	5.96489	9.49944	9.5699
	2.89045	3.18508	4.00448	3.71333	5.6497	5.79082			5.17209	5.79713	6.25198	5.96489	9.49944	9.5699
	2.9428	3.15115	4.03479	3.75317	5.68381	5.82062			5.24202	5.83642	6.28698	6.00447	9.52444	9.58769
	2.9428	3.15115	4.03479	3.75317	5.68381	5.82062			5.24202	5.83642	6.28698	6.00447	9.52444	9.58769
	2.92248	3.17615	4.04604	3.749	5.66428	5.8151			5.19905	5.86409	6.27635	5.96281	9.51012	9.56462
	2.92248	3.17615	4.04604	3.749	5.66428	5.8151			5.19905	5.86409	6.27635	5.96281	9.51012	9.56462
	2.91701	3.15472	4.02948	3.7365	5.66741	5.81077			5.26155	5.85115	6.28541	6.00838	9.51923	9.58913
	2.91701	3.15472	4.02948	3.7365	5.66741	5.81077			5.26155	5.85115	6.28541	6.00838	9.51923	9.58913
	2.94045	3.15249	4.05635	3.77322	5.67183	5.80644			5.25725	5.89133	6.29104	6.01828	9.53303	9.58961
	2.94045	3.15249	4.05635	3.77322	5.67183	5.80644			5.25725	5.89133	6.29104	6.01828	9.53303	9.58961
	2.91233	3.19043	4.02823	3.72531	5.63798	5.81149			5.21428	5.87615	6.29042	5.99276	9.52965	9.59731
	2.91233	3.19043	4.02823	3.72531	5.63798	5.81149			5.21428	5.87615	6.29042	5.99276	9.52965	9.59731
	2.92483	3.15606	4.03385	3.74171	5.64501	5.82423			5.2717	5.88999	6.3026	6.03468	9.54605	9.62087
	2.92483	3.15606	4.03385	3.74171	5.64501	5.82423			5.2717	5.88999	6.3026	6.03468	9.54605	9.62087
	2.92014	3.18106	4.04135	3.77166	5.68329	5.81462			5.25686	5.90159	6.3151	6.03208	9.56402	9.62279
	2.92014	3.18106	4.04135	3.77166	5.68329	5.81462			5.25686	5.90159	6.3151	6.03208	9.56402	9.62279
	2.901	3.16722	4.02135	3.74302	5.65777	5.78697			5.23225	5.88508	6.31792	6.01177	9.56897	9.61822
	2.901	3.16722	4.02135	3.74302	5.65777	5.78697			5.23225	5.88508	6.31792	6.01177	9.56897	9.61822
	2.95412	3.15695	4.06885	3.78286	5.68043	5.82351			5.29397	5.88151	6.36073	6.08156	9.59631	9.64346
	2.95412	3.15695	4.06885	3.78286	5.68043	5.82351			5.29397	5.88151	6.36073	6.08156	9.59631	9.64346
	2.90998	3.16677	4.02979	3.77557	5.66923	5.8062			5.25412	5.88418	6.3826	6.0313	9.57444	9.62159
	2.90998	3.16677	4.02979	3.77557	5.66923	5.8062			5.25412	5.88418	6.3826	6.0313	9.57444	9.62159
	2.90178	3.13061	4.03698	3.75161	5.65022	5.79611			5.30803	5.89222	6.38542	6.05135	9.601	9.65476
	2.90178	3.13061	4.03698	3.75161	5.65022	5.79611			5.30803	5.89222	6.38542	6.05135	9.601	9.65476
	2.93772	3.13597	4.0651	3.78468	5.67574	5.81558			5.33186	5.93016	6.4076	6.08911	9.62053	9.65428
	2.93772	3.13597	4.0651	3.78468	5.67574	5.81558			5.33186	5.93016	6.4076	6.08911	9.62053	9.65428
	2.91116	3.15517	4.04323	3.75656	5.64449	5.79298			5.2842	5.90874	6.37104	6.05161	9.60517	9.6687
	2.91116	3.15517	4.04323	3.75656	5.64449	5.79298			5.2842	5.90874	6.37104	6.05161	9.60517	9.6687
	2.91623	3.13418	4.05135	3.75005	5.65178	5.8074			5.34045	5.91052	6.3951	6.07921	9.63017	9.6925
	2.91623	3.13418	4.05135	3.75005	5.65178	5.8074			5.34045	5.91052	6.3951	6.07921	9.63017	9.6925
	2.93186	3.19758	4.0601	3.77791	5.67704	5.8086			5.33576	5.95025	6.41479	6.10395	9.6359	9.68865
	2.93186	3.19758	4.0601	3.77791	5.67704	5.8086			5.33576	5.95025	6.41479	6.10395	9.6359	9.68865
	2.85451	3.17034	4.03573	3.73937	5.63772	5.77135			5.31076	5.94534	6.4076	6.0964	9.6609	9.68793
	2.85451	3.17034	4.03573	3.73937	5.63772	5.77135			5.31076	5.94534	6.4076	6.0964	9.6609	9.68793
	2.90569	3.16945	4.06354	3.75916	5.67444	5.79659			5.34201	5.94356	6.44635	6.13989	9.68303	9.7026
	2.90569	3.16945	4.06354	3.75916	5.67444	5.79659			5.34201	5.94356	6.44635	6.13989	9.68303	9.7026
	2.89201	3.17302	4.04354	3.78442	5.6609	5.7961			5.33303	5.96142	6.43979	6.11723	9.67053	9.69635
	2.89201	3.17302	4.04354	3.78442	5.6609	5.7961			5.33303	5.96142	6.43979	6.11723	9.67053	9.69635
	2.88108	3.16633	4.01073	3.71411	5.64241	5.76726			5.36311	5.97034	6.4476	6.11723	9.68902	9.71389
	2.88108	3.16633	4.01073	3.71411	5.64241	5.76726			5.36311	5.97034	6.4476	6.11723	9.68902	9.71389
	2.93069	3.13508	4.05166	3.77843	5.66689	5.78409			5.40764	5.99624	6.47823	6.16958	9.73225	9.72928
	2.93069	3.13508	4.05166	3.77843	5.66689	5.78409			5.40764	5.99624	6.47823	6.16958	9.73225	9.72928
	2.88186	3.16454	4.05354	3.74953	5.6385	5.77062			5.3803	5.9882	6.45104	6.13546	9.69579	9.72784
	2.88186	3.16454	4.05354	3.74953	5.6385	5.77062			5.3803	5.9882	6.45104	6.13546	9.69579	9.72784
	2.8885	3.11231	4.03198	3.74458	5.63277	5.77183			5.43186	5.98552	6.47354	6.16072	9.73199	9.75596
	2.8885	3.11231	4.03198	3.74458	5.63277	5.77183			5.43186	5.98552	6.47354	6.16072	9.73199	9.75596
	2.92131	3.13642	4.07104	3.78911	5.65855	5.79442			5.41194	6.04222	6.49604	6.18781	9.74814	9.77952
	2.92131	3.13642	4.07104	3.78911	5.65855	5.79442			5.41194	6.04222	6.49604	6.18781	9.74814	9.77952
	2.88655	3.1757	4.05729	3.74927	5.62887	5.76221			5.38576	6.00204	6.49604	6.16098	9.75595	9.74851
	2.88655	3.1757	4.05729	3.74927	5.62887	5.76221			5.38576	6.00204	6.49604	6.16098	9.75595	9.74851
	2.88967	3.14892	4.06542	3.77426	5.6398	5.78096			5.42248	6.01186	6.5451	6.19562	9.77626	9.77135
	2.88967	3.14892	4.06542	3.77426	5.6398	5.78096			5.42248	6.01186	6.5451	6.19562	9.77626	9.77135
	2.90725	3.14445	4.06135	3.78338	5.67704	5.77327			5.41311	6.04534	6.51667	6.19276	9.76793	9.77183
	2.90725	3.14445	4.06135	3.78338	5.67704	5.77327			5.41311	6.04534	6.51667	6.19276	9.76793	9.77183
	2.86116	3.12525	4.02604	3.7313	5.64397	5.74923			5.42053	6.04802	6.53792	6.19302	9.78303	9.79034
	2.86116	3.12525	4.02604	3.7313	5.64397	5.74923			5.42053	6.04802	6.53792	6.19302	9.78303	9.79034
	2.90178	3.1257	4.05917	3.7701	5.64527	5.75909			5.47131	6.05383	6.56604	6.23286	9.80829	9.79106
	2.90178	3.1257	4.05917	3.7701	5.64527	5.75909			5.47131	6.05383	6.56604	6.23286	9.80829	9.79106
	2.87834	3.14088	4.03417	3.76359	5.65673	5.76173			5.4178	6.07615	6.54323	6.21567	9.79918	9.79346
	2.87834	3.14088	4.03417	3.76359	5.65673	5.76173			5.4178	6.07615	6.54323	6.21567	9.79918	9.79346
	2.83655	3.1257	4.04635	3.75109	5.6273	5.76582			5.4678	6.06811	6.57635	6.23572	9.81871	9.83577
	2.83655	3.1257	4.04635	3.75109	5.6273	5.76582			5.4678	6.06811	6.57635	6.23572	9.81871	9.83577
	2.90139	3.14534	4.06792	3.79328	5.64892	5.76245			5.46155	6.12927	6.57604	6.25968	9.84918	9.83841
	2.90139	3.14534	4.06792	3.79328	5.64892	5.76245			5.46155	6.12927	6.57604	6.25968	9.84918	9.83841
	2.83928	3.15517	4.06104	3.77036	5.62053	5.73			5.45139	6.10695	6.57823	6.24067	9.82835	9.83168
	2.83928	3.15517	4.06104	3.77036	5.62053	5.73			5.45139	6.10695	6.57823	6.24067	9.82835	9.83168
	2.88225	3.13017	4.06698	3.76697	5.62965	5.75404			5.51701	6.10338	6.61823	6.27973	9.8648	9.87808
	2.88225	3.13017	4.06698	3.76697	5.62965	5.75404			5.51701	6.10338	6.61823	6.27973	9.8648	9.87808
	2.90334	3.16186	4.05635	3.79301	5.65256	5.76101			5.48694	6.12615	6.60917	6.26359	9.86871	9.87231
	2.90334	3.16186	4.05635	3.79301	5.65256	5.76101			5.48694	6.12615	6.60917	6.26359	9.86871	9.87231
	2.86272	3.13463	4.04417	3.74874	5.63355	5.72519			5.47717	6.10383	6.62135	6.27531	9.87678	9.87063
	2.86272	3.13463	4.04417	3.74874	5.63355	5.72519			5.47717	6.10383	6.62135	6.27531	9.87678	9.87063
	2.90373	3.11142	4.05292	3.78729	5.62913	5.76029			5.52678	6.14936	6.6451	6.30421	9.9234	9.8913
	2.90373	3.11142	4.05292	3.78729	5.62913	5.76029			5.52678	6.14936	6.6451	6.30421	9.9234	9.8913
	2.88186	3.1382	4.05448	3.79067	5.61949	5.73937			5.48616	6.14847	6.65073	6.27817	9.90413	9.89803
	2.88186	3.1382	4.05448	3.79067	5.61949	5.73937			5.48616	6.14847	6.65073	6.27817	9.90413	9.89803
	2.87834	3.11767	4.03792	3.76072	5.61428	5.73168			5.48576	6.1382	6.65792	6.31697	9.926	9.92639
	2.87834	3.11767	4.03792	3.76072	5.61428	5.73168			5.48576	6.1382	6.65792	6.31697	9.926	9.92639
	2.91155	3.1257	4.05979	3.78781	5.6273	5.73986			5.53381	6.19267	6.68073	6.34197	9.97053	9.9413
	2.91155	3.1257	4.05979	3.78781	5.6273	5.73986			5.53381	6.19267	6.68073	6.34197	9.97053	9.9413
	2.85491	3.14802	4.04479	3.77452	5.5997	5.70308			5.48069	6.1882	6.68354	6.32557	9.95595	9.92471
	2.85491	3.14802	4.04479	3.77452	5.5997	5.70308			5.48069	6.1882	6.68354	6.32557	9.95595	9.92471
	2.87795	3.11588	4.02385	3.76802	5.62105	5.70644			5.55764	6.20115	6.68542	6.34953	9.96715	9.95692
	2.87795	3.11588	4.02385	3.76802	5.62105	5.70644			5.55764	6.20115	6.68542	6.34953	9.96715	9.95692
	2.89553	3.14222	4.06635	3.80447	5.61819	5.7175			5.55178	6.21142	6.69729	6.35161	9.99084	9.96005
	2.89553	3.14222	4.06635	3.80447	5.61819	5.7175			5.55178	6.21142	6.69729	6.35161	9.99084	9.96005
	2.83108	3.13731	4.05135	3.77817	5.60855	5.69154			5.52639	6.21231	6.69385	6.34067	9.98642	9.97207
	2.83108	3.13731	4.05135	3.77817	5.60855	5.69154			5.52639	6.21231	6.69385	6.34067	9.98642	9.97207
	2.8842	3.13016	4.05635	3.79718	5.62157	5.71582			5.56115	6.23909	6.72917	6.37114	10.027	10.0153
	2.8842	3.13016	4.05635	3.79718	5.62157	5.71582			5.56115	6.23909	6.72917	6.37114	10.027	10.0153
	2.86545	3.12749	4.04823	3.7977	5.64371	5.70115			5.53381	6.2574	6.70792	6.36958	10.0174	9.99827
	2.86545	3.12749	4.04823	3.7977	5.64371	5.70115			5.53381	6.2574	6.70792	6.36958	10.0174	9.99827
	2.82639	3.11231	4.03729	3.76697	5.60361	5.70332			5.55842	6.24133	6.74823	6.40161	10.0544	10.0413
	2.82639	3.11231	4.03729	3.76697	5.60361	5.70332			5.55842	6.24133	6.74823	6.40161	10.0544	10.0413
	2.87952	3.12838	4.07667	3.79953	5.62183	5.7163			5.59241	6.27481	6.75448	6.42088	10.1083	10.0384
	2.87952	3.12838	4.07667	3.79953	5.62183	5.7163			5.59241	6.27481	6.75448	6.42088	10.1083	10.0384
	2.82444	3.16945	4.04448	3.78338	5.61402	5.70452			5.56272	6.29133	6.77448	6.38494	10.0937	10.0307
	2.82444	3.16945	4.04448	3.78338	5.61402	5.70452			5.56272	6.29133	6.77448	6.38494	10.0937	10.0307
	2.83772	3.12302	4.04635	3.77609	5.60986	5.70716			5.62405	6.30115	6.78448	6.42088	10.1109	10.0786
	2.83772	3.12302	4.04635	3.77609	5.60986	5.70716			5.62405	6.30115	6.78448	6.42088	10.1109	10.0786
	2.85959	3.15784	4.07854	3.81567	5.62809	5.70476			5.62444	6.35115	6.79667	6.44458	10.1333	10.0817
	2.85959	3.15784	4.07854	3.81567	5.62809	5.70476			5.62444	6.35115	6.79667	6.44458	10.1333	10.0817
	2.82131	3.1449	4.05448	3.78234	5.58954	5.66702			5.60959	6.33106	6.78885	6.41801	10.1372	10.0858
	2.82131	3.1449	4.05448	3.78234	5.58954	5.66702			5.60959	6.33106	6.78885	6.41801	10.1372	10.0858
	2.85569	3.13016	4.04573	3.78468	5.59918	5.69707			5.69592	6.34356	6.82073	6.45447	10.1705	10.1252
	2.85569	3.13016	4.04573	3.78468	5.59918	5.69707			5.69592	6.34356	6.82073	6.45447	10.1705	10.1252
	2.85959	3.16141	4.05198	3.82479	5.6221	5.66822			5.64084	6.38731	6.8276	6.42739	10.1671	10.125
	2.85959	3.16141	4.05198	3.82479	5.6221	5.66822			5.64084	6.38731	6.8276	6.42739	10.1671	10.125
	2.83303	3.13463	4.0401	3.77296	5.61142	5.65091			5.6635	6.37972	6.8276	6.45213	10.1997	10.1718
	2.83303	3.13463	4.0401	3.77296	5.61142	5.65091			5.6635	6.37972	6.8276	6.45213	10.1997	10.1718
	2.85139	3.14802	4.05823	3.80552	5.59657	5.6776			5.68225	6.39847	6.85948	6.49588	10.2432	10.1894
	2.85139	3.14802	4.05823	3.80552	5.59657	5.6776			5.68225	6.39847	6.85948	6.49588	10.2432	10.1894
	2.82522	3.15561	4.0351	3.81359	5.58746	5.68024			5.66623	6.42615	6.83791	6.46645	10.2247	10.186
	2.82522	3.15561	4.0351	3.81359	5.58746	5.68024			5.66623	6.42615	6.83791	6.46645	10.2247	10.186
	2.82756	3.11945	4.04167	3.77921	5.57288	5.67952			5.6924	6.40517	6.85135	6.49197	10.2601	10.2132
	2.82756	3.11945	4.04167	3.77921	5.57288	5.67952			5.6924	6.40517	6.85135	6.49197	10.2601	10.2132
	2.84787	3.1315	4.0751	3.81828	5.60543	5.67591			5.74201	6.46677	6.85292	6.52531	10.2937	10.2504
	2.84787	3.1315	4.0751	3.81828	5.60543	5.67591			5.74201	6.46677	6.85292	6.52531	10.2937	10.2504
	2.826	3.15874	4.03698	3.78859	5.58017	5.65404			5.74944	6.44892	6.85292	6.48624	10.2888	10.2295
	2.826	3.15874	4.03698	3.78859	5.58017	5.65404			5.74944	6.44892	6.85292	6.48624	10.2888	10.2295
	2.80998	3.13418	4.06198	3.77036	5.58538	5.65837			5.79397	6.45204	6.88323	6.51255	10.3182	10.2778
	2.80998	3.13418	4.06198	3.77036	5.58538	5.65837			5.79397	6.45204	6.88323	6.51255	10.3182	10.2778
	2.85491	3.15561	4.06667	3.81359	5.61897	5.6574			5.78186	6.48686	6.88667	6.52583	10.3325	10.2716
	2.85491	3.15561	4.06667	3.81359	5.61897	5.6574			5.78186	6.48686	6.88667	6.52583	10.3325	10.2716
	2.80608	3.13374	4.05167	3.77479	5.58642	5.63048			5.77795	6.47838	6.89479	6.52192	10.3606	10.3016
	2.80608	3.13374	4.05167	3.77479	5.58642	5.63048			5.77795	6.47838	6.89479	6.52192	10.3606	10.3016
	2.86467	3.12481	4.06073	3.78755	5.57939	5.66365			5.84084	6.53954	6.92229	6.56385	10.4169	10.3531
	2.86467	3.12481	4.06073	3.78755	5.57939	5.66365			5.84084	6.53954	6.92229	6.56385	10.4169	10.3531
	2.83694	3.14891	4.0601	3.80552	5.58824	5.64731			5.82795	6.55025	6.92104	6.55369	10.395	10.3483
	2.83694	3.14891	4.0601	3.80552	5.58824	5.64731			5.82795	6.55025	6.92104	6.55369	10.395	10.3483
	2.81233	3.12168	4.03073	3.77713	5.58512	5.62712			5.86701	6.54847	6.94354	6.55161	10.4312	10.373
	2.81233	3.12168	4.03073	3.77713	5.58512	5.62712			5.86701	6.54847	6.94354	6.55161	10.4312	10.373
	2.87092	3.13552	4.06854	3.79692	5.61194	5.65428			5.87209	6.57615	6.95385	6.61775	10.4921	10.4064
	2.87092	3.13552	4.06854	3.79692	5.61194	5.65428			5.87209	6.57615	6.95385	6.61775	10.4921	10.4064
	2.82834	3.17704	4.03166	3.77973	5.58616	5.62255			5.84748	6.58508	6.95073	6.56776	10.4778	10.4016
	2.82834	3.17704	4.03166	3.77973	5.58616	5.62255			5.84748	6.58508	6.95073	6.56776	10.4778	10.4016
	2.82444	3.14222	4.02104	3.76385	5.57861	5.60211			5.88772	6.6007	6.99354	6.61958	10.4937	10.4379
	2.82444	3.14222	4.02104	3.76385	5.57861	5.60211			5.88772	6.6007	6.99354	6.61958	10.4937	10.4379
	2.8803	3.16811	4.0501	3.81515	5.61428	5.63216			5.8803	6.62704	7.00229	6.62114	10.507	10.4552
	2.8803	3.16811	4.0501	3.81515	5.61428	5.63216			5.8803	6.62704	7.00229	6.62114	10.507	10.4552
	2.84084	3.144	4.03417	3.77921	5.55543	5.6086			5.8717	6.62034	6.98979	6.60734	10.5304	10.4504
	2.84084	3.144	4.03417	3.77921	5.55543	5.6086			5.8717	6.62034	6.98979	6.60734	10.5304	10.4504
	2.86584	3.10918	4.06198	3.77765	5.59553	5.62736			5.93733	6.65026	7.02635	6.65708	10.5836	10.4949
	2.86584	3.10918	4.06198	3.77765	5.59553	5.62736			5.93733	6.65026	7.02635	6.65708	10.5836	10.4949
	2.87991	3.14356	4.03635	3.79927	5.60152	5.64298			5.91311	6.67347	6.98823	6.63572	10.5763	10.4973
	2.87991	3.14356	4.03635	3.79927	5.60152	5.64298			5.91311	6.67347	6.98823	6.63572	10.5763	10.4973
	2.8217	3.10115	4.01354	3.76619	5.56585	5.59106			5.95022	6.67347	7.02948	6.6313	10.5948	10.5264
	2.8217	3.10115	4.01354	3.76619	5.56585	5.59106			5.95022	6.67347	7.02948	6.6313	10.5948	10.5264
	2.86506	3.08865	4.04104	3.78338	5.57834	5.6199			6.0178	6.69892	7.07667	6.68911	10.6461	10.5399
	2.86506	3.08865	4.04104	3.78338	5.57834	5.6199			6.0178	6.69892	7.07667	6.68911	10.6461	10.5399
	2.83655	3.1257	4.02635	3.79197	5.58355	5.61486			5.99162	6.71633	7.05354	6.65578	10.6406	10.5451
	2.83655	3.1257	4.02635	3.79197	5.58355	5.61486			5.99162	6.71633	7.05354	6.65578	10.6406	10.5451
	2.80061	3.10963	4.05323	3.7602	5.56923	5.61702			6.03537	6.72481	7.07323	6.68468	10.6841	10.612
	2.80061	3.10963	4.05323	3.7602	5.56923	5.61702			6.03537	6.72481	7.07323	6.68468	10.6841	10.612
	2.85295	3.12302	4.05229	3.81124	5.59215	5.6199			6.02756	6.76588	7.09635	6.69666	10.7211	10.629
	2.85295	3.12302	4.05229	3.81124	5.59215	5.6199			6.02756	6.76588	7.09635	6.69666	10.7211	10.629
	2.81272	3.12883	4.03073	3.75578	5.5596	5.57687			6.0549	6.76945	7.09104	6.71203	10.7044	10.6377
	2.81272	3.12883	4.03073	3.75578	5.5596	5.57687			6.0549	6.76945	7.09104	6.71203	10.7044	10.6377
	2.84631	3.11142	4.02604	3.78416	5.57105	5.59611			6.09279	6.7757	7.13417	6.75187	10.7661	10.668
	2.84631	3.11142	4.02604	3.78416	5.57105	5.59611			6.09279	6.7757	7.13417	6.75187	10.7661	10.668
	2.86155	3.13954	4.05823	3.79848	5.57887	5.58817			6.07873	6.79936	7.13042	6.74432	10.7718	10.6858
	2.86155	3.13954	4.05823	3.79848	5.57887	5.58817			6.07873	6.79936	7.13042	6.74432	10.7718	10.6858
	2.80686	3.13552	4.02198	3.75083	5.54137	5.58457			6.07639	6.79445	7.10698	6.74588	10.782	10.7088
	2.80686	3.13552	4.02198	3.75083	5.54137	5.58457			6.07639	6.79445	7.10698	6.74588	10.782	10.7088
	2.86858	3.09802	4.02104	3.79718	5.56324	5.58312			6.15178	6.82972	7.18729	6.7964	10.8401	10.737
	2.86858	3.09802	4.02104	3.79718	5.56324	5.58312			6.15178	6.82972	7.18729	6.7964	10.8401	10.737
	2.84631	3.13195	4.02823	3.7839	5.55647	5.57856			6.12991	6.82392	7.17104	6.76906	10.8125	10.724
	2.84631	3.13195	4.02823	3.7839	5.55647	5.57856			6.12991	6.82392	7.17104	6.76906	10.8125	10.724
	2.80725	3.09713	4.00917	3.74562	5.55491	5.57591			6.1428	6.84847	7.18354	6.80864	10.8549	10.774
	2.80725	3.09713	4.00917	3.74562	5.55491	5.57591			6.1428	6.84847	7.18354	6.80864	10.8549	10.774
	2.84826	3.11142	4.03729	3.80083	5.56923	5.5812			6.1717	6.86231	7.20698	6.84015	10.9059	10.8161
	2.84826	3.11142	4.03729	3.80083	5.56923	5.5812			6.1717	6.86231	7.20698	6.84015	10.9059	10.8161
	2.80256	3.12258	4.01698	3.75499	5.52809	5.56101			6.17326	6.86231	7.19354	6.80473	10.9145	10.8115
	2.80256	3.12258	4.01698	3.75499	5.52809	5.56101			6.17326	6.86231	7.19354	6.80473	10.9145	10.8115
	2.81897	3.09222	4.01323	3.77869	5.55517	5.55644			6.23616	6.88731	7.22823	6.83963	10.9434	10.8713
	2.81897	3.09222	4.01323	3.77869	5.55517	5.55644			6.23616	6.88731	7.22823	6.83963	10.9434	10.8713
	2.84319	3.10918	4.0576	3.80604	5.56012	5.56341			6.22092	6.94936	7.24385	6.85031	10.963	10.8822
	2.84319	3.10918	4.0576	3.80604	5.56012	5.56341			6.22092	6.94936	7.24385	6.85031	10.963	10.8822
	2.80608	3.11677	4.03792	3.76202	5.52522	5.53192			6.26506	6.94311	7.2326	6.84979	10.9567	10.8795
	2.80608	3.11677	4.03792	3.76202	5.52522	5.53192			6.26506	6.94311	7.2326	6.84979	10.9567	10.8795
	2.83186	3.11142	4.04385	3.78338	5.53407	5.57038			6.29826	6.97302	7.29542	6.90499	11.0213	10.9322
	2.83186	3.11142	4.04385	3.78338	5.53407	5.57038			6.29826	6.97302	7.29542	6.90499	11.0213	10.9322
	2.82991	3.11811	4.01323	3.77791	5.54579	5.54803			6.27366	6.99177	7.27042	6.90265	11.0177	10.9343
	2.82991	3.11811	4.01323	3.77791	5.54579	5.54803			6.27366	6.99177	7.27042	6.90265	11.0177	10.9343
	2.80022	3.094	4.00292	3.75265	5.551	5.54202			6.29983	6.99088	7.30135	6.9227	11.0674	10.9838
	2.80022	3.094	4.00292	3.75265	5.551	5.54202			6.29983	6.99088	7.30135	6.9227	11.0674	10.9838
	2.84553	3.1065	4.03354	3.79197	5.54631	5.53336			6.34709	7.03552	7.32573	6.93989	11.113	10.9822
	2.84553	3.1065	4.03354	3.79197	5.54631	5.53336			6.34709	7.03552	7.32573	6.93989	11.113	10.9822
	2.83498	3.10561	4.01635	3.76098	5.5109	5.51606			6.32639	7.05159	7.30198	6.91671	11.1013	10.9843
	2.83498	3.10561	4.01635	3.76098	5.5109	5.51606			6.32639	7.05159	7.30198	6.91671	11.1013	10.9843
	2.81897	3.05918	4.02948	3.7464	5.54319	5.55067			6.40022	7.05204	7.35573	6.95656	11.1398	11.0658
	2.81897	3.05918	4.02948	3.7464	5.54319	5.55067			6.40022	7.05204	7.35573	6.95656	11.1398	11.0658
	2.85256	3.10204	4.03073	3.79666	5.54553	5.555			6.36506	7.09133	7.35417	6.97218	11.1812	11.0848
	2.85256	3.10204	4.03073	3.79666	5.54553	5.555			6.36506	7.09133	7.35417	6.97218	11.1812	11.0848
	2.78967	3.08195	4.0376	3.75604	5.5148	5.51942			6.37639	7.09534	7.35917	6.95994	11.1776	11.0939
	2.78967	3.08195	4.0376	3.75604	5.5148	5.51942			6.37639	7.09534	7.35917	6.95994	11.1776	11.0939
	2.83459	3.05427	4.02667	3.75317	5.54397	5.53433			6.44162	7.12124	7.39948	6.99067	11.2492	11.1137
	2.83459	3.05427	4.02667	3.75317	5.54397	5.53433			6.44162	7.12124	7.39948	6.99067	11.2492	11.1137
	2.82444	3.10025	4.0351	3.80499	5.54058	5.52639			6.3967	7.13508	7.37854	6.98624	11.2609	11.118
	2.82444	3.10025	4.0351	3.80499	5.54058	5.52639			6.3967	7.13508	7.37854	6.98624	11.2609	11.118
	2.80061	3.0632	3.99823	3.75734	5.5135	5.51005			6.40725	7.13508	7.40791	6.9977	11.2927	11.1519
	2.80061	3.0632	3.99823	3.75734	5.5135	5.51005			6.40725	7.13508	7.40791	6.9977	11.2927	11.1519
	2.85647	3.04356	4.02667	3.77947	5.55829	5.52423			6.46194	7.17436	7.4476	7.05447	11.3325	11.1723
	2.85647	3.04356	4.02667	3.77947	5.55829	5.52423			6.46194	7.17436	7.4476	7.05447	11.3325	11.1723
	2.80061	3.07615	4.0176	3.78546	5.51506	5.50668			6.4342	7.18865	7.41979	7.02114	11.3416	11.1848
	2.80061	3.07615	4.0176	3.78546	5.51506	5.50668			6.4342	7.18865	7.41979	7.02114	11.3416	11.1848
	2.78694	3.03284	4.02104	3.77036	5.52236	5.5074			6.4967	7.18418	7.45791	7.06411	11.3645	11.2302
	2.78694	3.03284	4.02104	3.77036	5.52236	5.5074			6.4967	7.18418	7.45791	7.06411	11.3645	11.2302
	2.84944	3.06856	4.02229	3.80291	5.5398	5.5151			6.50647	7.21499	7.45667	7.09067	11.4065	11.2343
	2.84944	3.06856	4.02229	3.80291	5.5398	5.5151			6.50647	7.21499	7.45667	7.09067	11.4065	11.2343
	2.80959	3.08061	3.98854	3.75708	5.50152	5.48841			6.4967	7.2199	7.45073	7.07062	11.4289	11.2528
	2.80959	3.08061	3.98854	3.75708	5.50152	5.48841			6.4967	7.2199	7.45073	7.07062	11.4289	11.2528
	2.83967	3.04624	4.01885	3.76723	5.51194	5.49514			6.54514	7.23954	7.50917	7.11854	11.483	11.3045
	2.83967	3.04624	4.01885	3.76723	5.51194	5.49514			6.54514	7.23954	7.50917	7.11854	11.483	11.3045
	2.85608	3.08151	4.01948	3.79718	5.51689	5.48577			6.52717	7.29401	7.51354	7.10552	11.4791	11.3031
	2.85608	3.08151	4.01948	3.79718	5.51689	5.48577			6.52717	7.29401	7.51354	7.10552	11.4791	11.3031
	2.76858	3.08642	4.00073	3.74041	5.48277	5.46894			6.51233	7.28106	7.50291	7.10708	11.5414	11.3302
	2.76858	3.08642	4.00073	3.74041	5.48277	5.46894			6.51233	7.28106	7.50291	7.10708	11.5414	11.3302
	2.81076	3.06454	4.02323	3.77218	5.49371	5.49779			6.601	7.30293	7.56229	7.15552	11.5843	11.3531
	2.81076	3.06454	4.02323	3.77218	5.49371	5.49779			6.601	7.30293	7.56229	7.15552	11.5843	11.3531
	2.801	3.07749	4.01604	3.79041	5.50308	5.46341			6.55803	7.35918	7.56198	7.13755	11.5916	11.3475
	2.801	3.07749	4.01604	3.79041	5.50308	5.46341			6.55803	7.35918	7.56198	7.13755	11.5916	11.3475
	2.78576	3.02927	3.99354	3.75708	5.49058	5.46149			6.60452	7.33999	7.57198	7.1563	11.6421	11.4048
	2.78576	3.02927	3.99354	3.75708	5.49058	5.46149			6.60452	7.33999	7.57198	7.1563	11.6421	11.4048
	2.84631	3.04802	4.03385	3.7865	5.50048	5.47303			6.6217	7.38061	7.60573	7.19718	11.6773	11.4189
	2.84631	3.04802	4.03385	3.7865	5.50048	5.47303			6.6217	7.38061	7.60573	7.19718	11.6773	11.4189
	2.79827	3.06588	4.0026	3.75343	5.47808	5.45981			6.58342	7.36722	7.59885	7.16177	11.6796	11.4387
	2.79827	3.06588	4.0026	3.75343	5.47808	5.45981			6.58342	7.36722	7.59885	7.16177	11.6796	11.4387
	2.82522	3.02302	4.00729	3.75525	5.47887	5.45957			6.65491	7.36365	7.63573	7.21958	11.7479	11.4848
	2.82522	3.02302	4.00729	3.75525	5.47887	5.45957			6.65491	7.36365	7.63573	7.21958	11.7479	11.4848
	2.85022	3.04847	4.04823	3.78546	5.4859	5.46221			6.63186	7.40829	7.64479	7.21984	11.7794	11.4848
	2.85022	3.04847	4.04823	3.78546	5.4859	5.46221			6.63186	7.40829	7.64479	7.21984	11.7794	11.4848
	2.78616	3.04267	4.03292	3.74275	5.44085	5.40861			6.64514	7.39758	7.6201	7.20708	11.7963	11.5156
	2.78616	3.04267	4.03292	3.74275	5.44085	5.40861			6.64514	7.39758	7.6201	7.20708	11.7963	11.5156
	2.82717	3.02436	4.04417	3.77453	5.45933	5.4526			6.72405	7.43195	7.68854	7.26385	11.8385	11.5411
	2.82717	3.02436	4.04417	3.77453	5.45933	5.4526			6.72405	7.43195	7.68854	7.26385	11.8385	11.5411
	2.80608	3.05159	4.03635	3.7826	5.47183	5.44851			6.71194	7.45517	7.6826	7.23833	11.8362	11.5427
	2.80608	3.05159	4.03635	3.7826	5.47183	5.44851			6.71194	7.45517	7.6826	7.23833	11.8362	11.5427
	2.77561	3.01633	4.01604	3.74692	5.45907	5.42591			6.71975	7.44758	7.69917	7.26307	11.8828	11.5812
	2.77561	3.01633	4.01604	3.74692	5.45907	5.42591			6.71975	7.44758	7.69917	7.26307	11.8828	11.5812
	2.81897	3.01454	4.04292	3.79979	5.46819	5.44178			6.74514	7.4824	7.73229	7.29249	11.9351	11.6144
	2.81897	3.01454	4.04292	3.79979	5.46819	5.44178			6.74514	7.4824	7.73229	7.29249	11.9351	11.6144
	2.77209	3.03508	4.0226	3.75708	5.45308	5.4175			6.71233	7.52079	7.73198	7.28078	11.9216	11.5961
	2.77209	3.03508	4.0226	3.75708	5.45308	5.4175			6.71233	7.52079	7.73198	7.28078	11.9216	11.5961
	2.76936	3.01097	4.01198	3.74666	5.44866	5.41413			6.7553	7.52793	7.75417	7.30916	11.9612	11.6502
	2.76936	3.01097	4.01198	3.74666	5.44866	5.41413			6.7553	7.52793	7.75417	7.30916	11.9612	11.6502
	2.82326	3.02749	4.00948	3.7938	5.47001	5.42447			6.76819	7.57392	7.7676	7.33546	12.0015	11.6656
	2.82326	3.02749	4.00948	3.7938	5.47001	5.42447			6.76819	7.57392	7.7676	7.33546	12.0015	11.6656
	2.72874	3.0132	4.01198	3.7464	5.4484	5.3937			6.75959	7.55025	7.78104	7.31802	12.0039	11.6891
	2.72874	3.0132	4.01198	3.7464	5.4484	5.3937			6.75959	7.55025	7.78104	7.31802	12.0039	11.6891
	2.77014	2.99936	4.01635	3.75578	5.45595	5.40692			6.81975	7.57659	7.82479	7.37322	12.0695	11.7175
	2.77014	2.99936	4.01635	3.75578	5.45595	5.40692			6.81975	7.57659	7.82479	7.37322	12.0695	11.7175
	2.77405	3.02347	4.00448	3.76281	5.44866	5.42207			6.79631	7.60651	7.8101	7.38104	12.07	11.7086
	2.77405	3.02347	4.00448	3.76281	5.44866	5.42207			6.79631	7.60651	7.8101	7.38104	12.07	11.7086
	2.73186	3.00517	3.99354	3.72609	5.43694	5.39851			6.78108	7.58597	7.84479	7.38468	12.1054	11.749
	2.73186	3.00517	3.99354	3.72609	5.43694	5.39851			6.78108	7.58597	7.84479	7.38468	12.1054	11.749
	2.8053	2.97525	4.03323	3.75864	5.4484	5.41365			6.83264	7.61365	7.87823	7.43338	12.1679	11.7709
	2.8053	2.97525	4.03323	3.75864	5.4484	5.41365			6.83264	7.61365	7.87823	7.43338	12.1679	11.7709
	2.7592	3.00204	4.03073	3.75968	5.42053	5.3901			6.80256	7.65249	7.88792	7.40786	12.1442	11.7649
	2.7592	3.00204	4.03073	3.75968	5.42053	5.3901			6.80256	7.65249	7.88792	7.40786	12.1442	11.7649
	2.74006	2.97481	4.00823	3.7365	5.41402	5.40067			6.87366	7.64624	7.90666	7.45812	12.1692	11.8098
	2.74006	2.97481	4.00823	3.7365	5.41402	5.40067			6.87366	7.64624	7.90666	7.45812	12.1692	11.8098
	2.78225	2.99266	4.02698	3.7964	5.45621	5.38745			6.90139	7.68865	7.94198	7.46151	12.2242	11.8218
	2.78225	2.99266	4.02698	3.7964	5.45621	5.38745			6.90139	7.68865	7.94198	7.46151	12.2242	11.8218
	2.7428	3.02124	4.01167	3.72557	5.41923	5.3586			6.87287	7.69713	7.9151	7.46072	12.2395	11.8283
	2.7428	3.02124	4.01167	3.72557	5.41923	5.3586			6.87287	7.69713	7.9151	7.46072	12.2395	11.8283
	2.75178	2.97525	4.01104	3.72348	5.42678	5.38721			6.93147	7.71811	7.96698	7.48885	12.2703	11.8444
	2.75178	2.97525	4.01104	3.72348	5.42678	5.38721			6.93147	7.71811	7.96698	7.48885	12.2703	11.8444
	2.76897	3.02347	4.0326	3.75812	5.43069	5.37615			6.90608	7.73106	7.9701	7.49718	12.282	11.8764
	2.76897	3.02347	4.0326	3.75812	5.43069	5.37615			6.90608	7.73106	7.9701	7.49718	12.282	11.8764
	2.71077	2.98731	4.01229	3.71046	5.40361	5.33721			6.92287	7.72659	7.96198	7.51932	12.3096	11.8997
	2.71077	2.98731	4.01229	3.71046	5.40361	5.33721			6.92287	7.72659	7.96198	7.51932	12.3096	11.8997
	2.75998	2.96945	4.01604	3.75031	5.41376	5.35788			6.98616	7.74668	8.01635	7.57244	12.3619	11.93
	2.75998	2.96945	4.01604	3.75031	5.41376	5.35788			6.98616	7.74668	8.01635	7.57244	12.3619	11.93
	2.7342	3.03106	4.01135	3.75786	5.4135	5.34346			6.94084	7.76052	8.01291	7.53859	12.3554	11.9074
	2.7342	3.03106	4.01135	3.75786	5.4135	5.34346			6.94084	7.76052	8.01291	7.53859	12.3554	11.9074
	2.70295	2.97883	3.98323	3.71775	5.38668	5.34923			6.97952	7.75293	8.00979	7.57374	12.3768	11.9586
	2.70295	2.97883	3.98323	3.71775	5.38668	5.34923			6.97952	7.75293	8.00979	7.57374	12.3768	11.9586
	2.75608	2.98284	4.02916	3.76255	5.40985	5.35933			7.001	7.78374	8.05229	7.62739	12.4323	11.9788
	2.75608	2.98284	4.02916	3.76255	5.40985	5.35933			7.001	7.78374	8.05229	7.62739	12.4323	11.9788
	2.701	2.99758	4.01292	3.72687	5.3721	5.33625			6.9635	7.79624	8.04323	7.60213	12.4195	11.9716
	2.701	2.99758	4.01292	3.72687	5.3721	5.33625			6.9635	7.79624	8.04323	7.60213	12.4195	11.9716
	2.72834	2.96633	4.00042	3.73078	5.37444	5.33312			7.02756	7.80427	8.07729	7.64119	12.4658	11.9971
	2.72834	2.96633	4.00042	3.73078	5.37444	5.33312			7.02756	7.80427	8.07729	7.64119	12.4658	11.9971
	2.7674	2.99311	4.00604	3.76515	5.39605	5.33433			7.00959	7.83552	8.09792	7.66749	12.4953	11.9997
	2.7674	2.99311	4.00604	3.76515	5.39605	5.33433			7.00959	7.83552	8.09792	7.66749	12.4953	11.9997
	2.72561	3.00427	4.01323	3.72426	5.35907	5.32255			7.00725	7.83329	8.10104	7.6589	12.5013	12.0158
	2.72561	3.00427	4.01323	3.72426	5.35907	5.32255			7.00725	7.83329	8.10104	7.6589	12.5013	12.0158
	2.75451	2.97436	4.02385	3.72322	5.37366	5.33168			7.08147	7.86186	8.14292	7.7076	12.5471	12.0562
	2.75451	2.97436	4.02385	3.72322	5.37366	5.33168			7.08147	7.86186	8.14292	7.7076	12.5471	12.0562
	2.74006	2.99311	4.02604	3.74354	5.37418	5.33529			7.04358	7.91142	8.14166	7.67947	12.5283	12.0545
	2.74006	2.99311	4.02604	3.74354	5.37418	5.33529			7.04358	7.91142	8.14166	7.67947	12.5283	12.0545
	2.7342	2.96499	3.98385	3.72166	5.35309	5.29875			7.06545	7.87347	8.15385	7.72218	12.5705	12.0894
	2.7342	2.96499	3.98385	3.72166	5.35309	5.29875			7.06545	7.87347	8.15385	7.72218	12.5705	12.0894
	2.76623	2.96186	4.02948	3.72869	5.37236	5.31654			7.10569	7.9199	8.18479	7.74432	12.6239	12.0973
	2.76623	2.96186	4.02948	3.72869	5.37236	5.31654			7.10569	7.9199	8.18479	7.74432	12.6239	12.0973
	2.72912	2.97793	4.00979	3.72817	5.35282	5.29538			7.07951	7.91677	8.19604	7.72036	12.6028	12.1009
	2.72912	2.97793	4.00979	3.72817	5.35282	5.29538			7.07951	7.91677	8.19604	7.72036	12.6028	12.1009
	2.73772	2.94936	3.99729	3.71645	5.33928	5.29466			7.13733	7.91142	8.23292	7.77348	12.6377	12.1399
	2.73772	2.94936	3.99729	3.71645	5.33928	5.29466			7.13733	7.91142	8.23292	7.77348	12.6377	12.1399
	2.76623	2.95963	4.00229	3.7576	5.36168	5.31486			7.13772	7.93284	8.23792	7.79067	12.6614	12.1425
	2.76623	2.95963	4.00229	3.7576	5.36168	5.31486			7.13772	7.93284	8.23792	7.79067	12.6614	12.1425
	2.71389	2.96097	3.98698	3.70734	5.32001	5.27543			7.13576	7.92972	8.25167	7.77687	12.6815	12.1456
	2.71389	2.96097	3.98698	3.70734	5.32001	5.27543			7.13576	7.92972	8.25167	7.77687	12.6815	12.1456
	2.701	2.94579	4.00792	3.71072	5.34137	5.30163			7.20178	7.96409	8.29417	7.83416	12.7198	12.1843
	2.701	2.94579	4.00792	3.71072	5.34137	5.30163			7.20178	7.96409	8.29417	7.83416	12.7198	12.1843
	2.72483	2.95918	4.02979	3.73937	5.37053	5.29058			7.16506	7.994	8.30198	7.82713	12.714	12.1757
	2.72483	2.95918	4.02979	3.73937	5.37053	5.29058			7.16506	7.994	8.30198	7.82713	12.714	12.1757
	2.69397	2.9449	3.99323	3.70682	5.34319	5.26101			7.16233	7.98106	8.32104	7.82791	12.7354	12.1884
	2.69397	2.9449	3.99323	3.70682	5.34319	5.26101			7.16233	7.98106	8.32104	7.82791	12.7354	12.1884
	2.72913	2.94534	4.00479	3.74223	5.34345	5.2812			7.2092	8.00472	8.36198	7.87479	12.7773	12.2274
	2.72913	2.94534	4.00479	3.74223	5.34345	5.2812			7.2092	8.00472	8.36198	7.87479	12.7773	12.2274
	2.70491	2.97659	3.99729	3.72739	5.32392	5.27615			7.1553	8.01588	8.35792	7.86984	12.7588	12.2088
	2.70491	2.97659	3.99729	3.72739	5.32392	5.27615			7.1553	8.01588	8.35792	7.86984	12.7588	12.2088
	2.69202	2.97034	4.00667	3.71567	5.31454	5.27255			7.22522	8.00338	8.38854	7.89536	12.7908	12.2427
	2.69202	2.97034	4.00667	3.71567	5.31454	5.27255			7.22522	8.00338	8.38854	7.89536	12.7908	12.2427
	2.69319	2.95517	4.02198	3.73572	5.34137	5.28144			7.23772	8.04847	8.40104	7.92791	12.8369	12.2603
	2.69319	2.95517	4.02198	3.73572	5.34137	5.28144			7.23772	8.04847	8.40104	7.92791	12.8369	12.2603
	2.66311	2.96186	4.00323	3.70578	5.30517	5.25812			7.22834	8.05204	8.39385	7.8977	12.8476	12.256
	2.66311	2.96186	4.00323	3.70578	5.30517	5.25812			7.22834	8.05204	8.39385	7.8977	12.8476	12.256
	2.68694	2.9324	3.9926	3.69145	5.30178	5.26774			7.26584	8.05115	8.45448	7.94171	12.8703	12.2915
	2.68694	2.9324	3.9926	3.69145	5.30178	5.26774			7.26584	8.05115	8.45448	7.94171	12.8703	12.2915
	2.71311	2.96097	4.0101	3.73182	5.3346	5.2675			7.24709	8.09043	8.44854	7.94874	12.8875	12.2942
	2.71311	2.96097	4.0101	3.73182	5.3346	5.2675			7.24709	8.09043	8.44854	7.94874	12.8875	12.2942
	2.65881	2.94043	3.99416	3.66775	5.29397	5.2312			7.24748	8.07347	8.45792	7.96932	12.8994	12.3112
	2.65881	2.94043	3.99416	3.66775	5.29397	5.2312			7.24748	8.07347	8.45792	7.96932	12.8994	12.3112
	2.69514	2.92213	3.99698	3.6951	5.31246	5.25957			7.32209	8.09847	8.48354	8.01463	12.9309	12.3514
	2.69514	2.92213	3.99698	3.6951	5.31246	5.25957			7.32209	8.09847	8.48354	8.01463	12.9309	12.3514
	2.68186	2.96945	3.9926	3.70994	5.30152	5.23336			7.27209	8.10606	8.48948	7.99562	12.9109	12.3221
	2.68186	2.96945	3.9926	3.70994	5.30152	5.23336			7.27209	8.10606	8.48948	7.99562	12.9109	12.3221
	2.67209	2.92168	3.9776	3.69432	5.29579	5.22567			7.31077	8.09713	8.51604	8.0214	12.9427	12.3531
	2.67209	2.92168	3.9776	3.69432	5.29579	5.22567			7.31077	8.09713	8.51604	8.0214	12.9427	12.3531
	2.70295	2.9132	4.0051	3.72635	5.31064	5.23937			7.31233	8.12392	8.5251	8.05499	12.9708	12.3665
	2.70295	2.9132	4.0051	3.72635	5.31064	5.23937			7.31233	8.12392	8.5251	8.05499	12.9708	12.3665
	2.66194	2.92972	3.97354	3.69666	5.27183	5.20909			7.31116	8.12302	8.52917	8.01749	12.9778	12.3461
	2.66194	2.92972	3.97354	3.69666	5.27183	5.20909			7.31116	8.12302	8.52917	8.01749	12.9778	12.3461
	2.66936	2.89713	3.96479	3.68468	5.29501	5.22159			7.36506	8.13329	8.5426	8.07609	12.9898	12.3745
	2.66936	2.89713	3.96479	3.68468	5.29501	5.22159			7.36506	8.13329	8.5426	8.07609	12.9898	12.3745
	2.68537	2.9199	3.98917	3.71385	5.301	5.2276			7.36545	8.15829	8.57323	8.08703	13.0101	12.3862
	2.68537	2.9199	3.98917	3.71385	5.301	5.2276			7.36545	8.15829	8.57323	8.08703	13.0101	12.3862
	2.62951	2.92481	3.96885	3.67843	5.26558	5.20836			7.35295	8.15159	8.57916	8.08208	13.0112	12.3728
	2.62951	2.92481	3.96885	3.67843	5.26558	5.20836			7.35295	8.15159	8.57916	8.08208	13.0112	12.3728
	2.68069	2.89847	3.97354	3.70421	5.27418	5.22375			7.42444	8.16722	8.61666	8.12661	13.0523	12.3995
	2.68069	2.89847	3.97354	3.70421	5.27418	5.22375			7.42444	8.16722	8.61666	8.12661	13.0523	12.3995
	2.69514	2.92749	3.97417	3.70864	5.2971	5.21894			7.37873	8.17302	8.61635	8.13494	13.0494	12.3877
	2.69514	2.92749	3.97417	3.70864	5.2971	5.21894			7.37873	8.17302	8.61635	8.13494	13.0494	12.3877
	2.66233	2.8949	3.95448	3.66619	5.2622	5.18986			7.39983	8.16186	8.63135	8.12973	13.0703	12.4223
	2.66233	2.8949	3.95448	3.66619	5.2622	5.18986			7.39983	8.16186	8.63135	8.12973	13.0703	12.4223
	2.72288	2.88999	3.98917	3.70265	5.27678	5.19009			7.44201	8.18954	8.67635	8.1826	13.1114	12.4387
	2.72288	2.88999	3.98917	3.70265	5.27678	5.19009			7.44201	8.18954	8.67635	8.1826	13.1114	12.4387
	2.67444	2.9074	3.96917	3.68963	5.2523	5.19298			7.39084	8.19936	8.68448	8.16828	13.1088	12.4365
	2.67444	2.9074	3.96917	3.68963	5.2523	5.19298			7.39084	8.19936	8.68448	8.16828	13.1088	12.4365
	2.63928	2.90026	3.94229	3.68078	5.24449	5.18409			7.44631	8.19847	8.72167	8.20551	13.1101	12.4521
	2.63928	2.90026	3.94229	3.68078	5.24449	5.18409			7.44631	8.19847	8.72167	8.20551	13.1101	12.4521
	2.6928	2.92615	3.95354	3.7201	5.26923	5.20019			7.45256	8.24088	8.71104	8.21775	13.1336	12.4545
	2.6928	2.92615	3.95354	3.7201	5.26923	5.20019			7.45256	8.24088	8.71104	8.21775	13.1336	12.4545
	2.63186	2.89222	3.93698	3.67218	5.21819	5.1651			7.42873	8.21543	8.71885	8.19822	13.1119	12.4384
	2.63186	2.89222	3.93698	3.67218	5.21819	5.1651			7.42873	8.21543	8.71885	8.19822	13.1119	12.4384
	2.67131	2.86945	3.95135	3.6865	5.23902	5.18529			7.48225	8.219	8.76354	8.24536	13.1554	12.4713
	2.67131	2.86945	3.95135	3.6865	5.23902	5.18529			7.48225	8.219	8.76354	8.24536	13.1554	12.4713
	2.67014	2.89177	3.95979	3.70317	5.2635	5.1687			7.4385	8.24802	8.75573	8.22453	13.1411	12.4552
	2.67014	2.89177	3.95979	3.70317	5.2635	5.1687			7.4385	8.24802	8.75573	8.22453	13.1411	12.4552
	2.62873	2.86945	3.93354	3.65968	5.22522	5.14971			7.47287	8.26097	8.78229	8.24718	13.1554	12.4723
	2.62873	2.86945	3.93354	3.65968	5.22522	5.14971			7.47287	8.26097	8.78229	8.24718	13.1554	12.4723
	2.68498	2.8574	3.95823	3.69718	5.23512	5.16005			7.52287	8.27615	8.81635	8.29874	13.1992	12.4862
	2.68498	2.8574	3.95823	3.69718	5.23512	5.16005			7.52287	8.27615	8.81635	8.29874	13.1992	12.4862
	2.65959	2.91231	3.97135	3.68078	5.2273	5.13865			7.47092	8.31767	8.8126	8.27739	13.1604	12.4819
	2.65959	2.91231	3.97135	3.68078	5.2273	5.13865			7.47092	8.31767	8.8126	8.27739	13.1604	12.4819
	2.651	2.87124	3.93979	3.67114	5.21168	5.12856			7.4924	8.30427	8.80979	8.31072	13.1893	12.5134
	2.651	2.87124	3.93979	3.67114	5.21168	5.12856			7.4924	8.30427	8.80979	8.31072	13.1893	12.5134
	2.67913	2.87213	3.98198	3.71359	5.2247	5.16413			7.5217	8.33909	8.85479	8.35057	13.2221	12.5235
	2.67913	2.87213	3.98198	3.71359	5.2247	5.16413			7.5217	8.33909	8.85479	8.35057	13.2221	12.5235
	2.64436	2.86543	3.96542	3.68885	5.18954	5.1199			7.49358	8.32927	8.83885	8.3188	13.2226	12.5026
	2.64436	2.86543	3.96542	3.68885	5.18954	5.1199			7.49358	8.32927	8.83885	8.3188	13.2226	12.5026
	2.66897	2.85561	3.95698	3.67166	5.1859	5.12952			7.56155	8.33329	8.90135	8.35499	13.2638	12.5326
	2.66897	2.85561	3.95698	3.67166	5.1859	5.12952			7.56155	8.33329	8.90135	8.35499	13.2638	12.5326
	2.69397	2.87124	3.96792	3.7115	5.20595	5.14274			7.53889	8.35427	8.88073	8.35187	13.2768	12.5163
	2.69397	2.87124	3.96792	3.7115	5.20595	5.14274			7.53889	8.35427	8.88073	8.35187	13.2768	12.5163
	2.63069	2.86008	3.95229	3.6602	5.18876	5.09298			7.53772	8.33552	8.88542	8.35109	13.2713	12.5254
	2.63069	2.86008	3.95229	3.6602	5.18876	5.09298			7.53772	8.33552	8.88542	8.35109	13.2713	12.5254
	2.67952	2.85338	3.9876	3.69067	5.21194	5.1187			7.58498	8.37883	8.94354	8.39536	13.2802	12.5442
	2.67952	2.85338	3.9876	3.69067	5.21194	5.1187			7.58498	8.37883	8.94354	8.39536	13.2802	12.5442
	2.68459	2.87392	3.94448	3.69197	5.18381	5.11053			7.56311	8.3824	8.93729	8.37895	13.2596	12.5312
	2.68459	2.87392	3.94448	3.69197	5.18381	5.11053			7.56311	8.3824	8.93729	8.37895	13.2596	12.5312
	2.67014	2.85204	3.93385	3.64301	5.14866	5.09971			7.58069	8.36142	8.98542	8.39874	13.2856	12.5608
	2.67014	2.85204	3.93385	3.64301	5.14866	5.09971			7.58069	8.36142	8.98542	8.39874	13.2856	12.5608
	2.69397	2.85829	3.95104	3.68885	5.17418	5.11053			7.60256	8.41365	9.0126	8.44093	13.3265	12.5649
	2.69397	2.85829	3.95104	3.68885	5.17418	5.11053			7.60256	8.41365	9.0126	8.44093	13.3265	12.5649
	2.66194	2.88284	3.9526	3.67114	5.15439	5.07183			7.55178	8.40918	9.0226	8.399	13.307	12.5451
	2.66194	2.88284	3.9526	3.67114	5.15439	5.07183			7.55178	8.40918	9.0226	8.399	13.307	12.5451
	2.68186	2.84043	3.9351	3.66176	5.15986	5.08409			7.60256	8.39892	9.03448	8.45421	13.3312	12.5865
	2.68186	2.84043	3.9351	3.66176	5.15986	5.08409			7.60256	8.39892	9.03448	8.45421	13.3312	12.5865
	2.70569	2.86811	3.96104	3.69952	5.19423	5.08793			7.6135	8.41811	9.04292	8.46255	13.3494	12.5875
	2.70569	2.86811	3.96104	3.69952	5.19423	5.08793			7.6135	8.41811	9.04292	8.46255	13.3494	12.5875
	2.64905	2.87347	3.92385	3.66489	5.13564	5.04683			7.61545	8.40874	9.04948	8.44718	13.3619	12.5975
	2.64905	2.87347	3.92385	3.66489	5.13564	5.04683			7.61545	8.40874	9.04948	8.44718	13.3619	12.5975
	2.66116	2.869	3.93104	3.66802	5.14345	5.06822			7.65061	8.41097	9.08729	8.4964	13.3807	12.6274
	2.66116	2.869	3.93104	3.66802	5.14345	5.06822			7.65061	8.41097	9.08729	8.4964	13.3807	12.6274
	2.67834	2.88686	3.94354	3.68781	5.14892	5.06846			7.65022	8.45338	9.08948	8.47505	13.3802	12.604
	2.67834	2.88686	3.94354	3.68781	5.14892	5.06846			7.65022	8.45338	9.08948	8.47505	13.3802	12.604
	2.60647	2.84713	3.93573	3.65369	5.13147	5.05091			7.64709	8.41499	9.09042	8.49536	13.4039	12.6266
	2.60647	2.84713	3.93573	3.65369	5.13147	5.05091			7.64709	8.41499	9.09042	8.49536	13.4039	12.6266
	2.66858	2.85427	3.94792	3.6865	5.16741	5.0538			7.68147	8.47213	9.13729	8.53208	13.4106	12.6288
	2.66858	2.85427	3.94792	3.6865	5.16741	5.0538			7.68147	8.47213	9.13729	8.53208	13.4106	12.6288
	2.62366	2.88061	3.93323	3.66593	5.14319	5.03817			7.63772	8.47927	9.11198	8.51567	13.3955	12.6288
	2.62366	2.88061	3.93323	3.66593	5.14319	5.03817			7.63772	8.47927	9.11198	8.51567	13.3955	12.6288
	2.64319	2.84177	3.9276	3.64666	5.13121	5.02351			7.69358	8.43865	9.13573	8.55994	13.4351	12.6581
	2.64319	2.84177	3.9276	3.64666	5.13121	5.02351			7.69358	8.43865	9.13573	8.55994	13.4351	12.6581
	2.68342	2.86186	3.94291	3.68937	5.16168	5.02928			7.7053	8.46767	9.1651	8.56046	13.4471	12.6786
	2.68342	2.86186	3.94291	3.68937	5.16168	5.02928			7.7053	8.46767	9.1651	8.56046	13.4471	12.6786
	2.62991	2.88463	3.92229	3.64093	5.10569	5.00452			7.66272	8.4565	9.17948	8.52687	13.4434	12.6656
	2.62991	2.88463	3.92229	3.64093	5.10569	5.00452			7.66272	8.4565	9.17948	8.52687	13.4434	12.6656
	2.63537	2.84043	3.91198	3.65942	5.14996	5.0163			7.70491	8.47704	9.22167	8.59927	13.4807	12.6774
	2.63537	2.84043	3.91198	3.65942	5.14996	5.0163			7.70491	8.47704	9.22167	8.59927	13.4807	12.6774
	2.64787	2.86722	3.93135	3.66854	5.1596	5.01894			7.70022	8.50874	9.21698	8.59223	13.4554	12.6769
	2.64787	2.86722	3.93135	3.66854	5.1596	5.01894			7.70022	8.50874	9.21698	8.59223	13.4554	12.6769
	2.60451	2.85784	3.9076	3.64406	5.11506	4.99394			7.71389	8.50427	9.22354	8.58051	13.4713	12.6778
	2.60451	2.85784	3.9076	3.64406	5.11506	4.99394			7.71389	8.50427	9.22354	8.58051	13.4713	12.6778
	2.66311	2.83463	3.90698	3.65031	5.10673	5.00212			7.78069	8.54088	9.28104	8.61775	13.4927	12.6937
[truncated: 8,504 more rows]
