# Supplementary material for: Dendritic sodium spikes are required for long-term potentiation at distal synapses on hippocampal pyramidal neurons
Source: eLife journal article supplement (doi:10.7554/elife.06414), 2015-08-06
Supplement: supp [file elife_poa_e06414_Figure_2_source_data_1.xlsx]

## Sheet: Figure 2
Panel A	sampling rate 50000Hz						Panel B		sampling rate 50000Hz			stimulation artifacts and action potential are truncated			Panel C	Control	Stim. #1	Stim. #2	Stim. #3	Stim. #4	Stim. #5	TTX	Stim. #1	Stim. #2	Stim. #3	Stim. #4	Stim. #5	Fit	independent variable	dependent variable	85% prediction band	upper bound	lower bound	99% prediction band	upper bound		Panel D		0.85	0.9	0.95	0.97	0.99
	Control	TTX		Control	TTX			Top	Control	TTX	Bottom	Control	TTX				0.897848		0.473779	0.337616	0.173443		0.701468		0.44025	0.321745	0.163959		1	0.976204		1.46715	0.485255		1.85727			Control	18	17	16	15	12
	-65.7176	-64.9685		-64.8103	-64.4389				-64.5429	-65.3919		0.0489463	0.423596				1	1.6759	0.32305	0.170749	0.280873		0.93028	0.98731	0.313229	0.318138	0.190328		1.004	0.974842		1.46576	0.48392		1.85586			TTX	7	5	3	2	1
	-65.7175	-64.9686		-64.806	-64.4347				-64.5419	-65.3882		0.0480553	0.423523				1.1361	0.578841	0.412148	0.132807	0.195206		0.992091	0.462861	0.204248	0.186113	0.141783		1.00801	0.973482		1.46438	0.482587		1.85445
	-65.7173	-64.9687		-64.8012	-64.4308				-64.5392	-65.3779		0.0454247	0.423214				1.07921	0.522367	0.183598	0.241479	0.234908		0.942373	0.42724	0.155583	0.183937	0.118515		1.01201	0.972125		1.46299	0.481255		1.85305
	-65.7169	-64.9685		-64.796	-64.4271				-64.536	-65.3631		0.0411841	0.422416				0.989884	0.386197	0.128408	0.1699	0.113442		0.958303	0.398089	0.112686	0.174036	0.151011		1.01602	0.970769		1.46161	0.479925		1.85165
	-65.7162	-64.9676		-64.7905	-64.4237				-64.533	-65.3456		0.0355551	0.42076				0.693628		0.52355				0.507203		0.497562				1.02002	0.969416		1.46024	0.478597		1.85025
	-65.7154	-64.9657		-64.7847	-64.4207				-64.5302	-65.3264		0.0288575	0.417825				1.12941	0.77028	0.666054	0.356897			0.824716	0.504299	0.419391	0.208351			1.02402	0.968065		1.45886	0.47727		1.84886
	-65.7146	-64.9622		-64.7787	-64.4182				-64.5264	-65.3058		0.0215133	0.413226				1.07599	0.80209	0.317969	0.358143			0.898597	0.532893	0.315436	0.174878			1.02803	0.966716		1.45749	0.475945		1.84746
	-65.7141	-64.9571		-64.7728	-64.416				-64.5202	-65.2836		0.0140443	0.406685				1	0.592428	0.309352	0.21208			0.831985	0.430375	0.262872	0.171121			1.03203	0.965369		1.45611	0.474622		1.84607
	-65.7142	-64.9503		-64.7669	-64.4143				-64.5112	-65.26		0.00706155	0.398106				0.966255	0.293529	0.25133				0.739491	0.252569	0.193348				1.03604	0.964024		1.45475	0.473301		1.84469
	-65.7155	-64.9421		-64.7613	-64.413				-64.5008	-65.2371		0.00124242	0.387609				0.71249	1.41731	2.29178	0.761814			1.10708	1.34067	0.968213	0.513012			1.04004	0.962681		1.45338	0.471981		1.8433
	-65.718	-64.9331		-64.7561	-64.4122				-64.4918	-65.218		-0.00270438	0.375544				1.04145	1.45449	0.951199	0.367462			1.15674	0.990507	0.72721	0.542024			1.04404	0.96134		1.45202	0.470663		1.84192
	-65.722	-64.9238		-64.7514	-64.4118				-64.4883	-65.2058		-0.00408554	0.362471				1	0.923908	0.507782				1.38861	0.759911	0.500166				1.04805	0.960001		1.45066	0.469347		1.84054
	-65.7273	-64.9147		-64.7474	-64.4118				-64.4942	-65.2014		-0.00227872	0.3491				1.17785	0.298379					1.37799	0.558423					1.05205	0.958665		1.4493	0.468033		1.83916
	-65.7334	-64.9065		-64.7441	-64.4124				-64.511	-65.2024		0.00320724	0.336217				0.878954						1.28517						1.05606	0.95733		1.44794	0.46672		1.83779
	-65.7398	-64.8995		-64.7418	-64.4132				-64.5347	-65.2055		0.0126731	0.324585				0.787659	2.22385	1.73627	1.5023	0.835651		0.70862	0.901885	0.410089	0.537426	0.241146		1.06006	0.955998		1.44659	0.465409		1.83642
	-65.7457	-64.8937		-64.7404	-64.4144				-64.5569	-65.2089		0.0261773	0.314851				0.71243	1.49087	0.766338	1.53961			0.59799	0.720685	0.419481	0.392855			1.06406	0.954667		1.44523	0.4641		1.83505
	-65.7506	-64.8891		-64.74	-64.4158				-64.5686	-65.2129		0.0434973	0.307457				1	1.04112	1.82639	0.430091	0.639521		0.871497	0.336374	0.317862	0.542166	1.91379		1.06807	0.953339		1.44389	0.462792		1.83369
	-65.754	-64.8855		-64.7408	-64.4174				-64.5665	-65.2187		0.0641098	0.302573				2.16036	0.571751	1.4062	0.40008			1.19887	0.542916	0.279692	0.843377			1.07207	0.952013		1.44254	0.461487		1.83232
	-65.7558	-64.8823		-64.7428	-64.4188				-64.555	-65.2266		0.0871931	0.300054				1.09489	1.25734	0.814434	1.15949			0.933088	0.578092	0.329419	0.271865			1.07608	0.950689		1.44119	0.460182		1.83096
	-65.7559	-64.8792		-64.746	-64.4201				-64.5435	-65.2352		0.111656	0.299441				0.771717	0.796693	0.380026	0.639016	0.205718		0.69823	0.603614	0.361079	0.260283	0.146679		1.08008	0.949366		1.43985	0.45888		1.8296
	-65.7549	-64.8759		-64.7503	-64.421				-64.5395	-65.242		0.136188	0.299982				0.78239	0.39251	0.68977	0.522207	0.241952		0.928163	0.571282	0.584975	0.472012	0.204685		1.08408	0.948046		1.43851	0.45758		1.82825
	-65.7531	-64.872		-64.7559	-64.4215				-64.5449	-65.2442		0.159337	0.300693				1	0.84971	0.207072	0.534493	0.408092		1.13482	0.434829	0.309649	0.18953	0.198267		1.08809	0.946728		1.43718	0.456281		1.8269
	-65.7512	-64.8677		-64.7625	-64.4214				-64.555	-65.2395		0.1796	0.30044				1.41004	0.514031	0.502897	0.355067	0.244223		0.762537	0.244514	0.440182	0.226189	0.229522		1.09209	0.945412		1.43584	0.454984		1.82555
	-65.7499	-64.8632		-64.7701	-64.4207				-64.5621	-65.2264		0.195527	0.298035				1.10181	0.783876	0.298306	0.304506	0.226547		1.09237	0.220675	0.266214	0.0935145	0.165025		1.0961	0.944098		1.43451	0.453688		1.8242
	-65.7497	-64.8589		-64.7787	-64.4192				-64.559	-65.2045		0.205826	0.292336				0.520717	0.823778	0.436902	0.297833			0.535928	0.591887	0.402776	0.407246			1.1001	0.942786		1.43318	0.452394		1.82285
	-65.7511	-64.8557		-64.788	-64.417				-64.5427	-65.1757		0.20947	0.28235				0.851452	0.504154	0.285153	0.214067	0.205075		0.670962	0.46967	0.279111	0.0955215	0.0959812		1.1041	0.941476		1.43185	0.451102		1.82151
	-65.7543	-64.8542		-64.7979	-64.4142				-64.5153	-65.1438		0.205775	0.267318				1.01404	0.442748	0.227954	0.170879	0.170233		0.854779	0.388692	0.234599	0.100259	0.134275		1.10811	0.940168		1.43052	0.449812		1.82017
	-65.7591	-64.8551		-64.8081	-64.4108				-64.4831	-65.1145		0.194473	0.246776				1.03641	0.364873	0.287265	0.176531	0.18412		0.8268	0.299784	0.217388	0.141095	0.0980843		1.11211	0.938863		1.4292	0.448524		1.81884
	-65.7652	-64.8593		-64.8185	-64.4069				-64.4531	-65.0938		0.175742	0.220599				1	0.321425	0.101721	0.167785	0.100757		0.804318	0.306986	0.192811	0.0856625	0.131181		1.11612	0.937559		1.42788	0.447237		1.8175
	-65.7718	-64.8668		-64.8288	-64.4026				-64.4299	-65.0858		0.150215	0.189017				0.73546	0.702241	0.33267	0.373248	0.189895		0.705004	0.852156	0.32605	0.179346	0.203065		1.12012	0.936257		1.42656	0.445952		1.81617
	-65.7779	-64.8778		-64.8387	-64.398				-64.4148	-65.0904		0.118945	0.152603				1	0.302634	0.237483	0.196887	0.211612		0.812367	0.613835	0.479489	0.240352	0.161402		1.12412	0.934957		1.42525	0.444669		1.81484
	-65.7824	-64.8918		-64.8481	-64.3934				-64.4064	-65.1028		0.0833443	0.112238				1.18013	0.240691	0.0913702	0.226232	0.171522		0.950344	0.393209	0.150376	0.0919748	0.194668		1.12813	0.933659		1.42393	0.443387		1.81351
	-65.784	-64.9082		-64.8567	-64.3887				-64.4032	-65.1162		0.0450961	0.069059				0.990753	0.381323	0.215246	0.137582	0.19592		0.882558	0.45375	0.175306	0.200669	0.187343		1.13213	0.932364		1.42262	0.442107		1.81219
	-65.7819	-64.9258		-64.8644	-64.3843				-64.4052	-65.1242		0.00604115	0.0243895				1.00842	0.329491	0.105334	0.197353	0.273684		1.04032	0.251638	0.0208463	0.185108	0.216491		1.13614	0.93107		1.42131	0.440829		1.81087
	-65.7754	-64.9436		-64.871	-64.38				-64.4132	-65.1228		-0.0319445	-0.0203343				1.29817	2.69752	0.809796	0.635713			0.990369	1.36308	0.752348	0.877246			1.14014	0.929778		1.42	0.439553		1.80955
	-65.7646	-64.9604		-64.8764	-64.3761				-64.4276	-65.1121		-0.067075	-0.0636438				0.973375	0.951827	0.422177	0.543564	0.367031		1.224	0.881866	0.27298	0.635205	0.371767		1.14414	0.928488		1.4187	0.438278		1.80823
	-65.7502	-64.9753		-64.8806	-64.3725				-64.4472	-65.0971		-0.0977724	-0.104115				1	1.02738	0.504503	0.401366	0.303947		1.73635	0.968786	0.528739	0.298268	0.531712		1.14815	0.927201		1.4174	0.437005		1.80692
	-65.7335	-64.9877		-64.8837	-64.3694				-64.4695	-65.0859		-0.122768	-0.140436				0.897153	0.734032	0.591255	0.29886	0.289371		0.920292	0.906194	0.451963	0.240454	0.623394		1.15215	0.925915		1.4161	0.435734		1.8056
	-65.7161	-64.9972		-64.8856	-64.3667				-64.4913	-65.0864		-0.141179	-0.171471				1.05875	0.352913	0.512832	0.29949	0.358112		0.998602	0.62379	0.601637	0.28731	0.252395		1.15616	0.924631		1.4148	0.434465		1.80429
	-65.7	-65.004		-64.8865	-64.3644				-64.51	-65.1022		-0.152558	-0.1963				1.27027	1.68458	1.53729	0.703892			1.24206	1.23984	1.13095	0.75136			1.16016	0.923349		1.4135	0.433197		1.80299
	-65.6871	-65.0085		-64.8866	-64.3625				-64.5237	-65.131		-0.156907	-0.214258				1.0235	1.02167	0.603743	0.435885	0.520707		0.976921	0.832927	0.720928	0.501179	0.436888		1.16416	0.922069		1.41221	0.431931		1.80168
	-65.6789	-65.0115		-64.8861	-64.3609				-64.5312	-65.1653		-0.154665	-0.224943				1	0.77827	0.402331	0.587245			1.02801	0.656861	0.431527	0.408607			1.16817	0.920792		1.41092	0.430667		1.80038
	-65.6762	-65.0139		-64.8851	-64.3596				-64.5333	-65.1967		-0.14666	-0.228225				0.847823	0.540004	0.405282	0.262143			0.774306	0.426428	0.25984	0.409688			1.17217	0.919516		1.40963	0.429404		1.79908
	-65.6792	-65.0163		-64.8839	-64.3585				-64.5328	-65.2186		-0.134047	-0.224231				0.878983	0.396479	0.324944	0.557041			0.709205	0.373216	0.316872	0.424129			1.17618	0.918242		1.40834	0.428143		1.79778
	-65.6874	-65.0194		-64.8826	-64.3575				-64.533	-65.2285		-0.118217	-0.21333																1.18018	0.91697		1.40706	0.426884		1.79649
	-65.6998	-65.0235		-64.8815	-64.3565				-64.5357	-65.228		-0.100699	-0.196102																1.18418	0.9157		1.40577	0.425627		1.7952
	-65.7149	-65.0286		-64.8805	-64.3555				-64.54	-65.2211		-0.0830676	-0.173314																1.18819	0.914432		1.40449	0.424371		1.79391
	-65.7312	-65.0342		-64.8798	-64.3542				-64.5433	-65.2123		-0.0668362	-0.145884																1.19219	0.913166		1.40322	0.423117		1.79262
	-65.747	-65.0396		-64.8793	-64.3528				-64.543	-65.2047		-0.0533752	-0.114856																1.1962	0.911902		1.40194	0.421865		1.79133
	-65.7613	-65.0441		-64.8791	-64.351				-64.5374	-65.1998		-0.0438348	-0.0813694																1.2002	0.91064		1.40067	0.420615		1.79005
	-65.773	-65.0468		-64.8791	-64.3489				-64.5256	-65.1981		-0.039089	-0.046638																1.2042	0.90938		1.39939	0.419366		1.78877
	-65.7817	-65.0469		-64.8791	-64.3463				-64.5089	-65.2002		-0.0396965	-0.0119182																1.20821	0.908122		1.39812	0.418119		1.78749
	-65.7873	-65.0442		-64.879	-64.3432				-64.491	-65.2068		-0.0458821	0.021518																1.21221	0.906866		1.39686	0.416874		1.78622
	-65.7902	-65.0383		-64.8789	-64.3396				-64.4779	-65.2174		-0.0575373	0.0524196																1.21622	0.905612		1.39559	0.41563		1.78494
	-65.7907	-65.0294		-64.8785	-64.3356				-64.4744	-65.2297		-0.0742373	0.0795984																1.22022	0.904359		1.39433	0.414389		1.78367
	-65.7895	-65.0179		-64.8779	-64.3311				-64.4809	-65.2391		-0.0952745	0.101981																1.22422	0.903109		1.39307	0.413148		1.7824
	-65.7871	-65.0045		-64.877	-64.3263				-64.4924	-65.2404		-0.119704	0.118664																1.22823	0.90186		1.39181	0.41191		1.78114
	-65.784	-64.9898		-64.876	-64.3212				-64.5017	-65.231		-0.1464	0.128978																1.23223	0.900614		1.39055	0.410673		1.77987
	-65.7806	-64.9747		-64.8749	-64.316				-64.5045	-65.2118		-0.174119	0.132541																1.23624	0.899369		1.3893	0.409439		1.77861
	-65.7769	-64.96		-64.8739	-64.3108				-64.5021	-65.1874		-0.201567	0.12931																1.24024	0.898127		1.38805	0.408205		1.77735
	-65.773	-64.9465		-64.873	-64.3057				-64.5003	-65.1632		-0.227468	0.119607																1.24424	0.896886		1.3868	0.406974		1.77609
	-65.7688	-64.9348		-64.8725	-64.3009				-64.5045	-65.1427		-0.250635	0.104125																1.24825	0.895647		1.38555	0.405744		1.77484
	-65.764	-64.9255		-64.8724	-64.2965				-64.5159	-65.1266		-0.270027	0.0839053																1.25225	0.894411		1.3843	0.404516		1.77359
	-65.7582	-64.9187		-64.873	-64.2926				-64.531	-65.1137		-0.284808	0.060275																1.25626	0.893176		1.38306	0.40329		1.77234
	-65.7515	-64.9145		-64.8742	-64.2893				-64.5452	-65.1026		-0.29439	0.0347594																1.26026	0.891943		1.38182	0.402065		1.77109
	-65.7435	-64.9127		-64.876	-64.2865				-64.557	-65.0939		-0.298462	0.00896607																1.26426	0.890711		1.38058	0.400843		1.76984
	-65.7342	-64.9131		-64.8786	-64.2843				-64.5681	-65.0902		-0.297006	-0.0155473																1.26827	0.889482		1.37934	0.399621		1.7686
	-65.7238	-64.9154		-64.8817	-64.2827				-64.5819	-65.0957		-0.290292	-0.0374091																1.27227	0.888255		1.37811	0.398402		1.76736
	-65.7124	-64.9192		-64.8852	-64.2816				-64.5996	-65.1141		-0.278856	-0.0555597																1.27628	0.88703		1.37687	0.397184		1.76612
	-65.7001	-64.9243		-64.8889	-64.2809				-64.6193	-65.1459		-0.26346	-0.0693534																1.28028	0.885806		1.37564	0.395968		1.76488
	-65.6872	-64.9306		-64.8925	-64.2806				-64.6369	-65.1861		-0.245038	-0.0786231																1.28428	0.884585		1.37441	0.394754		1.76365
	-65.6738	-64.9382		-64.8958	-64.2808				-64.6483	-65.2253		-0.224625	-0.0837003																1.28829	0.883365		1.37319	0.393542		1.76241
	-65.66	-64.9472		-64.8984	-64.2814				-64.6515	-65.2538		-0.203285	-0.0853842																1.29229	0.882147		1.37196	0.392331		1.76118
	-65.6459	-64.9578		-64.9002	-64.2823				-64.6468	-65.2661		-0.182035	-0.0848631																1.2963	0.880931		1.37074	0.391122		1.75995
	-65.6318	-64.9701		-64.9009	-64.2838				-64.6365	-65.2627		-0.161776	-0.083594																1.3003	0.879717		1.36952	0.389914		1.75873
	-65.6179	-64.9839		-64.9004	-64.2856				-64.6236	-65.2479		-0.143229	-0.0831521																1.3043	0.878505		1.3683	0.388709		1.7575
	-65.6047	-64.9988		-64.8986	-64.2879				-64.6115	-65.2269		-0.1269	-0.0850666																1.30831	0.877295		1.36708	0.387505		1.75628
	-65.5927	-65.0141		-64.8954	-64.2908				-64.6028	-65.203		-0.113057	-0.0906595																1.31231	0.876086		1.36587	0.386303		1.75506
	-65.5826	-65.0287		-64.8909	-64.2941				-64.5986	-65.1783		-0.101729	-0.100905																1.31632	0.87488		1.36466	0.385102		1.75385
	-65.5749	-65.0415		-64.8853	-64.2977				-64.5985	-65.1558		-0.0927344	-0.116322																1.32032	0.873675		1.36345	0.383903		1.75263
	-65.57	-65.0515		-64.8786	-64.3017				-64.6007	-65.1394		-0.0857268	-0.13692																1.32432	0.872472		1.36224	0.382706		1.75142
	-65.568	-65.0579		-64.8712	-64.3059				-64.6036	-65.1317		-0.0802517	-0.162187																1.32833	0.871271		1.36103	0.381511		1.75021
	-65.569	-65.0601		-64.8633	-64.3101				-64.607	-65.132		-0.0758172	-0.191137																1.33233	0.870072		1.35983	0.380317		1.749
	-65.5726	-65.0585		-64.855	-64.3142				-64.6117	-65.1354		-0.0719634	-0.222401																1.33634	0.868875		1.35863	0.379125		1.74779
	-65.5784	-65.0536		-64.8465	-64.318				-64.6194	-65.1367		-0.0683259	-0.254349																1.34034	0.86768		1.35742	0.377935		1.74659
	-65.5858	-65.0465		-64.8381	-64.3213				-64.63	-65.1355		-0.064685	-0.285238																1.34434	0.866486		1.35623	0.376746		1.74538
	-65.5943	-65.0388		-64.8298	-64.3241				-64.6413	-65.1388		-0.0609959	-0.313355																1.34835	0.865295		1.35503	0.375559		1.74418
	-65.6035	-65.0319		-64.8217	-64.3262				-64.6501	-65.1569		-0.0573955	-0.337153																1.35235	0.864105		1.35384	0.374374		1.74299
	-65.6129	-65.0273		-64.8138	-64.3276				-64.6548	-65.1964		-0.0541856	-0.355355																1.35636	0.862917		1.35264	0.373191		1.74179
	-65.6223	-65.026		-64.806	-64.3283				-64.6564	-65.2531		-0.0517921	-0.367023																1.36036	0.861731		1.35145	0.372009		1.7406
	-65.6317	-65.0287		-64.7984	-64.3281				-64.6569	-65.3113		-0.0507073	-0.371587																1.36436	0.860547		1.35026	0.370829		1.7394
	-65.6409	-65.0355		-64.7908	-64.3272				-64.6572	-65.3515		-0.0514183	-0.368829																1.36837	0.859364		1.34908	0.369651		1.73821
	-65.6498	-65.046		-64.7832	-64.3255				-64.6564	-65.3613		-0.0543318	-0.358842																1.37237	0.858183		1.34789	0.368474		1.73703
	-65.6584	-65.0596		-64.7755	-64.3232				-64.6525	-65.3433		-0.0597025	-0.341953																1.37638	0.857005		1.34671	0.367299		1.73584
	-65.6663	-65.0753		-64.7677	-64.3203				-64.6437	-65.3123		-0.0675736	-0.318653																1.38038	0.855828		1.34553	0.366126		1.73466
	-65.6735	-65.0919		-64.7598	-64.3168				-64.6297	-65.2861		-0.0777365	-0.289514																1.38438	0.854653		1.34435	0.364954		1.73348
	-65.6799	-65.1086		-64.7518	-64.3127				-64.6126	-65.2749		-0.0897154	-0.255132																1.38839	0.853479		1.34317	0.363785		1.7323
	-65.6853	-65.1243		-64.7437	-64.3081				-64.5966	-65.2781		-0.102778	-0.216095																1.39239	0.852308		1.342	0.362616		1.73112
	-65.6899	-65.1385		-64.7357	-64.303				-64.5875	-65.2877		-0.115975	-0.172972																1.3964	0.851138		1.34083	0.36145		1.72994
	-65.6938	-65.1506		-64.7277	-64.2975				-64.5896	-65.2965		-0.128201	-0.126337																1.4004	0.84997		1.33966	0.360285		1.72877
	-65.6974	-65.1606		-64.72	-64.2917				-64.6029	-65.3028		-0.138277	-0.07681																1.4044	0.848804		1.33849	0.359122		1.7276
	-65.7008	-65.1685		-64.7127	-64.2855				-64.6231	-65.3096		-0.145043	-0.0251099																1.40841	0.84764		1.33732	0.357961		1.72643
	-65.7044	-65.1744		-64.7058	-64.279				-64.6438	-65.3211		-0.14745	0.027896																1.41241	0.846478		1.33615	0.356801		1.72526
	-65.7079	-65.1786		-64.6995	-64.2725				-64.6607	-65.338		-0.144655	0.0811548																1.41642	0.845317		1.33499	0.355643		1.7241
	-65.7114	-65.1813		-64.694	-64.2659				-64.6732	-65.3574		-0.136088	0.133418																1.42042	0.844158		1.33383	0.354487		1.72293
	-65.7142	-65.1824		-64.6894	-64.2595				-64.684	-65.3743		-0.121511	0.183266																1.42442	0.843001		1.33267	0.353332		1.72177
	-65.7159	-65.1819		-64.6857	-64.2534				-64.6955	-65.3842		-0.101047	0.229165																1.42843	0.841846		1.33151	0.352179		1.72061
	-65.7161	-65.1796		-64.6829	-64.2477				-64.7078	-65.3843		-0.0751771	0.269561																1.43243	0.840692		1.33036	0.351028		1.71946
	-65.7143	-65.1754		-64.6812	-64.2425				-64.7185	-65.3732		-0.0447168	0.302994																1.43644	0.839541		1.3292	0.349878		1.7183
	-65.7107	-65.1692		-64.6804	-64.2381				-64.7251	-65.3503		-0.0107668	0.328224																1.44044	0.838391		1.32805	0.34873		1.71715
	-65.7055	-65.1611		-64.6805	-64.2345				-64.7273	-65.3158		0.0253574	0.34435																1.44444	0.837243		1.3269	0.347584		1.716
	-65.6995	-65.1515		-64.6814	-64.2318				-64.726	-65.272		0.062207	0.350915																1.44845	0.836097		1.32575	0.34644		1.71485
	-65.6934	-65.1411		-64.6827	-64.23				-64.721	-65.2243		0.0982889	0.347965																1.45245	0.834952		1.32461	0.345297		1.7137
	-65.6879	-65.1308		-64.6844	-64.2293				-64.7106	-65.1807		0.132155	0.33607																1.45646	0.833809		1.32346	0.344156		1.71255
	-65.6834	-65.1215		-64.6862	-64.2295				-64.6937	-65.1483		0.162482	0.316292																1.46046	0.832668		1.32232	0.343016		1.71141
	-65.6801	-65.114		-64.6877	-64.2306				-64.6719	-65.1301		0.188149	0.290107																1.46446	0.831529		1.32118	0.341878		1.71027
	-65.6774	-65.109		-64.6887	-64.2325				-64.6497	-65.1239		0.208286	0.259276																1.46847	0.830392		1.32004	0.340742		1.70913
	-65.6747	-65.1069		-64.689	-64.2352				-64.6328	-65.1252		0.222321	0.225704																1.47247	0.829256		1.3189	0.339608		1.70799
	-65.671	-65.1075		-64.6884	-64.2386				-64.6246	-65.132		0.229995	0.19127																1.47648	0.828122		1.31777	0.338475		1.70685
	-65.6655	-65.1105		-64.6868	-64.2425				-64.625	-65.147		0.231368	0.157676																1.48048	0.82699		1.31664	0.337344		1.70572
	-65.6575	-65.1149		-64.6841	-64.2467				-64.6305	-65.1745		0.226801	0.126313																1.48448	0.825859		1.3155	0.336214		1.70459
	-65.6467	-65.1198		-64.6802	-64.2513				-64.6348	-65.2143		0.216921	0.0981661																1.48849	0.824731		1.31438	0.335086		1.70346
	-65.6336	-65.1239		-64.6754	-64.2559				-64.6319	-65.2588		0.202575	0.0737597																1.49249	0.823604		1.31325	0.33396		1.70233
	-65.6188	-65.1261		-64.6697	-64.2607				-64.6188	-65.2939		0.184765	0.0531614																1.4965	0.822479		1.31212	0.332836		1.7012
	-65.6032	-65.1254		-64.6635	-64.2653				-64.5972	-65.3059		0.164583	0.0360246																1.5005	0.821355		1.311	0.331713		1.70008
	-65.5881	-65.1213		-64.6568	-64.2699				-64.573	-65.2883		0.14313	0.0216738																1.5045	0.820234		1.30988	0.330592		1.69896
	-65.5743	-65.1137		-64.65	-64.2743				-64.5543	-65.2461		0.121444	0.00921727																1.50851	0.819114		1.30875	0.329472		1.69783
	-65.5626	-65.1031		-64.6434	-64.2785				-64.5476	-65.1942		0.100432	-0.00232625																1.51251	0.817995		1.30764	0.328355		1.69672
	-65.5535	-65.0906		-64.6373	-64.2825				-64.5554	-65.151		0.0808125	-0.0139002																1.51652	0.816879		1.30652	0.327239		1.6956
	-65.5469	-65.0775		-64.6318	-64.2863				-64.5753	-65.1305		0.0630746	-0.0262956																1.52052	0.815764		1.3054	0.326124		1.69448
	-65.5426	-65.0654		-64.6271	-64.2899				-64.601	-65.1369		0.0474633	-0.0400585																1.52452	0.814651		1.30429	0.325011		1.69337
	-65.5402	-65.0559		-64.6234	-64.2933				-64.6259	-65.1637		0.0339852	-0.0554277																1.52853	0.81354		1.30318	0.3239		1.69226
	-65.5388	-65.0504		-64.6208	-64.2966				-64.6454	-65.1978		0.0224403	-0.0723049																1.53253	0.81243		1.30207	0.32279		1.69115
	-65.5379	-65.0497		-64.6192	-64.2997				-64.657	-65.2253		0.0124757	-0.0902579																1.53654	0.811322		1.30096	0.321683		1.69004
	-65.5367	-65.0544		-64.6187	-64.3027				-64.6591	-65.2365		0.00365578	-0.108554																1.54054	0.810216		1.29986	0.320576		1.68894
	-65.5348	-65.0642		-64.6191	-64.3055				-64.6504	-65.2295		-0.00445904	-0.126217																1.54454	0.809112		1.29875	0.319472		1.68783
	-65.532	-65.0784		-64.6205	-64.3081				-64.6319	-65.2093		-0.0122335	-0.142106																1.54855	0.808009		1.29765	0.318369		1.68673
	-65.5282	-65.0961		-64.6228	-64.3105				-64.6078	-65.1851		-0.0198892	-0.155001																1.55255	0.806908		1.29655	0.317268		1.68563
	-65.5237	-65.116		-64.6258	-64.3126				-64.5852	-65.1672		-0.027454	-0.163696																1.55656	0.805809		1.29545	0.316168		1.68453
	-65.519	-65.1367		-64.6294	-64.3144				-64.5692	-65.1633		-0.0347383	-0.16709																1.56056	0.804711		1.29435	0.31507		1.68343
	-65.5145	-65.1571		-64.6337	-64.3156				-64.561	-65.1774		-0.0413386	-0.164273																1.56456	0.803616		1.29326	0.313974		1.68234
	-65.5105	-65.1761		-64.6384	-64.3162				-64.5585	-65.2074		-0.0466713	-0.154591																1.56857	0.802521		1.29216	0.312879		1.68124
	-65.5071	-65.193		-64.6436	-64.3163				-64.5597	-65.2463		-0.0500308	-0.13771																1.57257	0.801429		1.29107	0.311786		1.68015
	-65.5043	-65.2076		-64.649	-64.3158				-64.5651	-65.2841		-0.0506663	-0.11365																1.57658	0.800338		1.28998	0.310694		1.67906
	-65.5015	-65.2196		-64.6546	-64.3146				-64.5771	-65.3122		-0.047868	-0.0828101																1.58058	0.799249		1.28889	0.309605		1.67798
	-65.4982	-65.2293		-64.6603	-64.313				-64.5976	-65.3262		-0.0410524	-0.04597																1.58458	0.798162		1.28781	0.308516		1.67689
	-65.4934	-65.2368		-64.6659	-64.311				-64.6255	-65.3258		-0.0298375	-0.00427868																1.58859	0.797076		1.28672	0.30743		1.67581
	-65.4865	-65.2423		-64.6712	-64.3089				-64.6556	-65.3144		-0.0141002	0.0407762																1.59259	0.795992		1.28564	0.306345		1.67472
	-65.4769	-65.2461		-64.6761	-64.3067				-64.6794	-65.2969		0.0059901	0.0874122																1.5966	0.794909		1.28456	0.305262		1.67364
	-65.4644	-65.2484		-64.6803	-64.3047				-64.6898	-65.2787		0.0299629	0.13361																1.6006	0.793829		1.28348	0.30418		1.67256
	-65.4488	-65.2493		-64.6837	-64.3032				-64.685	-65.2631		0.0570627	0.177186																1.6046	0.79275		1.2824	0.3031		1.67149
	-65.4303	-65.249		-64.6861	-64.3022				-64.6691	-65.2515		0.0862862	0.215873																1.60861	0.791672		1.28132	0.302022		1.67041
	-65.4093	-65.2479		-64.6874	-64.3019				-64.6485	-65.2435		0.116435	0.24742																1.61261	0.790597		1.28025	0.300945		1.66934
	-65.3862	-65.2463		-64.6876	-64.3024				-64.6287	-65.2381		0.14618	0.269699																1.61662	0.789523		1.27918	0.29987		1.66827
	-65.3617	-65.2448		-64.6867	-64.3038				-64.6123	-65.235		0.174127	0.280817																1.62062	0.78845		1.2781	0.298796		1.66719
	-65.3363	-65.2439		-64.6848	-64.3059				-64.6006	-65.2339		0.198887	0.279239																1.62462	0.78738		1.27704	0.297724		1.66613
	-65.3111	-65.2442		-64.682	-64.3087				-64.5932	-65.2333		0.219141	0.263908																1.62863	0.786311		1.27597	0.296654		1.66506
	-65.2868	-65.2461		-64.6786	-64.312				-64.5892	-65.2293		0.233702	0.234346																1.63263	0.785243		1.2749	0.295585		1.66399
	-65.2645	-65.2498		-64.6747	-64.3158				-64.5877	-65.2166		0.241573	0.190745																1.63664	0.784178		1.27384	0.294518		1.66293
	-65.2453	-65.2556		-64.6708	-64.3199				-64.5878	-65.1911		0.241999	0.134022																1.64064	0.783114		1.27277	0.293453		1.66187
	-65.2301	-65.2633		-64.667	-64.324				-64.5882	-65.1534		0.234517	0.0658265																1.64464	0.782051		1.27171	0.292389		1.66081
	-65.2194	-65.2729		-64.6637	-64.3281				-64.5869	-65.1085		0.219004	-0.011493																1.64865	0.78099		1.27065	0.291327		1.65975
	-65.2135	-65.2841		-64.6612	-64.332				-64.5815	-65.0643		0.195703	-0.0949827																1.65265	0.779931		1.2696	0.290266		1.6587
	-65.212	-65.297		-64.6597	-64.3356				-64.5702	-65.0285		0.165257	-0.181228																1.65666	0.778874		1.26854	0.289207		1.65764
	-65.2144	-65.3112		-64.6594	-64.3387				-64.5525	-65.0072		0.128706	-0.266542																1.66066	0.777818		1.26749	0.28815		1.65659
	-65.2195	-65.3269		-64.6604	-64.3415				-64.5292	-65.0063		0.0874711	-0.347191																1.66466	0.776764		1.26643	0.287094		1.65554
	-65.226	-65.3439		-64.6626	-64.3437				-64.5025	-65.0311		0.0433147	-0.419627																1.66867	0.775711		1.26538	0.28604		1.65449
	-65.2326	-65.3621		-64.6662	-64.3453				-64.4761	-65.0841		-0.00173805	-0.480719																1.67267	0.77466		1.26433	0.284987		1.65344
	-65.238	-65.3814		-64.6709	-64.3464				-64.4551	-65.1616		-0.0454993	-0.527956																1.67668	0.773611		1.26329	0.283936		1.65239
	-65.2412	-65.4012		-64.6767	-64.3469				-64.4457	-65.2511		-0.0857444	-0.559601																1.68068	0.772563		1.26224	0.282887		1.65135
	-65.2414	-65.4212		-64.6834	-64.3469				-64.4534	-65.3351		-0.120354	-0.574783																1.68468	0.771517		1.2612	0.281839		1.6503
	-65.2383	-65.4406		-64.6906	-64.3464				-64.48	-65.3982		-0.14746	-0.573525																1.68869	0.770473		1.26015	0.280793		1.64926
	-65.2319	-65.4587		-64.6982	-64.3454				-64.5217	-65.4328		-0.165584	-0.556693																1.69269	0.76943		1.25911	0.279748		1.64822
	-65.2226	-65.4747		-64.7058	-64.344				-64.5692	-65.4399		-0.173754	-0.525891																1.6967	0.768389		1.25807	0.278705		1.64719
	-65.2111	-65.488		-64.7133	-64.3423				-64.6127	-65.4255		-0.171586	-0.4833																1.7007	0.767349		1.25703	0.277664		1.64615
	-65.1987	-65.4981		-64.7203	-64.3404				-64.6453	-65.3978		-0.159319	-0.431488																1.7047	0.766311		1.256	0.276624		1.64512
	-65.1868	-65.5049		-64.7267	-64.3384				-64.6652	-65.3661		-0.137812	-0.373212																1.70871	0.765275		1.25496	0.275586		1.64408
	-65.1769	-65.5082		-64.7324	-64.3364				-64.6749	-65.3396		-0.108478	-0.311224																1.71271	0.76424		1.25393	0.274549		1.64305
	-65.1706	-65.5084		-64.7371	-64.3345				-64.6775	-65.3256		-0.0731841	-0.248107																1.71672	0.763207		1.2529	0.273514		1.64202
	-65.1692	-65.5058		-64.7407	-64.3327				-64.6752	-65.3261		-0.0341112	-0.186146																1.72072	0.762176		1.25187	0.272481		1.64099
	-65.1733	-65.5008		-64.7433	-64.3312				-64.6681	-65.3377		0.00640213	-0.127243																1.72472	0.761146		1.25084	0.271449		1.63997
	-65.1833	-65.4941		-64.7448	-64.33				-64.6547	-65.3536		0.0460264	-0.0728803																1.72873	0.760117		1.24982	0.270419		1.63894
	-65.1987	-65.4861		-64.7451	-64.3291				-64.634	-65.3674		0.0825964	-0.0241206																1.73273	0.759091		1.24879	0.26939		1.63792
	-65.2185	-65.4771		-64.7444	-64.3286				-64.6072	-65.3749		0.114245	0.0183615																1.73674	0.758065		1.24777	0.268363		1.6369
	-65.2413	-65.4675		-64.7428	-64.3286				-64.5784	-65.3748		0.139502	0.0542262																1.74074	0.757042		1.24675	0.267337		1.63588
	-65.2657	-65.4576		-64.7404	-64.3291				-64.5534	-65.3678		0.157357	0.0834054																1.74474	0.75602		1.24573	0.266313		1.63486
	-65.2904	-65.4477		-64.7373	-64.3301				-64.5367	-65.3559		0.167275	0.10604																1.74875	0.754999		1.24471	0.26529		1.63384
	-65.3143	-65.4381		-64.7337	-64.3315				-64.5288	-65.3419		0.16918	0.122427																1.75275	0.753981		1.24369	0.26427		1.63283
	-65.3368	-65.4289		-64.7299	-64.3334				-64.5266	-65.3287		0.163401	0.13297																1.75676	0.752963		1.24268	0.26325		1.63181
	-65.3578	-65.4204		-64.7259	-64.3358				-64.5262	-65.3178		0.150599	0.138156																1.76076	0.751948		1.24166	0.262232		1.6308
	-65.3775	-65.4125		-64.722	-64.3386				-64.5262	-65.3099		0.131678	0.138533																1.76476	0.750934		1.24065	0.261216		1.62979
	-65.3962	-65.4052		-64.7184	-64.3417				-64.5277	-65.3051		0.107696	0.134698																1.76877	0.749921		1.23964	0.260202		1.62878
	-65.4143	-65.3981		-64.7151	-64.3451				-64.5327	-65.3036		0.07978	0.127293																1.77277	0.74891		1.23863	0.259189		1.62778
	-65.4321	-65.3911		-64.7123	-64.3486				-64.5413	-65.305		0.0490564	0.116996																1.77678	0.747901		1.23762	0.258177		1.62677
	-65.4497	-65.3835		-64.71	-64.3522				-64.5511	-65.3066		0.0165983	0.104512																1.78078	0.746893		1.23662	0.257167		1.62577
	-65.4673	-65.375		-64.7082	-64.3558				-64.558	-65.3047		-0.01661	0.0905514																1.78478	0.745887		1.23561	0.256159		1.62476
	-65.4847	-65.3652		-64.7068	-64.3592				-64.5577	-65.2966		-0.0496899	0.0758127																1.78879	0.744882		1.23461	0.255152		1.62376
	-65.5016	-65.3542		-64.7059	-64.3625				-64.5483	-65.2838		-0.0818711	0.0609502																1.79279	0.743879		1.23361	0.254146		1.62276
	-65.5177	-65.3421		-64.7053	-64.3656				-64.5322	-65.2716		-0.112484	0.0465454																1.7968	0.742877		1.23261	0.253143		1.62177
	-65.5323	-65.3291		-64.705	-64.3684				-64.5164	-65.2665		-0.140948	0.033079																1.8008	0.741877		1.23161	0.25214		1.62077
	-65.5447	-65.3159		-64.7048	-64.371				-64.5101	-65.2723		-0.166753	0.0209086																1.8048	0.740879		1.23062	0.25114		1.61978
	-65.5539	-65.303		-64.7049	-64.3733				-64.5196	-65.2886		-0.189448	0.0102571																1.80881	0.739882		1.22962	0.250141		1.61878
	-65.5587	-65.2911		-64.705	-64.3753				-64.5438	-65.3114		-0.208629	0.00121373																1.81281	0.738887		1.22863	0.249143		1.61779
	-65.5582	-65.2808		-64.7052	-64.377				-64.5743	-65.3342		-0.22393	-0.00624987																1.81682	0.737893		1.22764	0.248147		1.6168
	-65.5517	-65.2724		-64.7056	-64.3785				-64.5997	-65.3494		-0.235016	-0.0122476																1.82082	0.7369		1.22665	0.247152		1.61581
	-65.5388	-65.2664		-64.7061	-64.3798				-64.6121	-65.3507		-0.241578	-0.0169322																1.82482	0.73591		1.22566	0.246159		1.61483
	-65.5199	-65.2629		-64.7069	-64.381				-64.6106	-65.3368		-0.243318	-0.020434																1.82883	0.73492		1.22467	0.245168		1.61384
	-65.496	-65.262		-64.7081	-64.3819				-64.6013	-65.3128		-0.239933	-0.0227892																1.83283	0.733933		1.22369	0.244178		1.61286
	-65.4686	-65.2635		-64.7098	-64.3827				-64.5934	-65.2896		-0.231076	-0.0238561																1.83684	0.732947		1.2227	0.24319		1.61188
	-65.4398	-65.2672		-64.712	-64.3833				-64.5942	-65.2771		-0.216306	-0.0232231																1.84084	0.731962		1.22172	0.242203		1.61089
	-65.4115	-65.2726		-64.7148	-64.3838				-64.6059	-65.2792		-0.195003	-0.0201055																1.84484	0.730979		1.22074	0.241218		1.60992
	-65.386	-65.279		-64.7183	-64.3842				-64.6245	-65.2917		-0.166259	-0.0132326																1.84885	0.729997		1.21976	0.240234		1.60894
	-65.3648	-65.2856		-64.7224	-64.3844				-64.6427	-65.3059		-0.12873	-0.000721246																1.85285	0.729017		1.21878	0.239251		1.60796
	-65.3493	-65.2914		-64.7271	-64.3844				-64.6543	-65.3141		-0.0804495	0.0200613																1.85686	0.728039		1.21781	0.238271		1.60699
	-65.34	-65.2953		-64.7322	-64.3843				-64.6572	-65.314		-0.0186229	0.0526433																1.86086	0.727062		1.21683	0.237291		1.60601
	-65.3369	-65.2966		-64.7376	-64.3837				-64.6542	-65.3083		0.0606047	0.101593																1.86486	0.726086		1.21586	0.236314		1.60504
	-65.3396	-65.2944		-64.7429	-64.3826				-64.6502	-65.3023		0.162365	0.172644																1.86887	0.725112		1.21489	0.235338		1.60407
	-65.3471	-65.2884		-64.7478	-64.3805				-64.6491	-65.3006		0.293239	0.272768																1.87287	0.72414		1.21392	0.234363		1.6031
	-65.3583	-65.2787		-64.7514	-64.377				-64.652	-65.3053		0.461331	0.410164																1.87688	0.723169		1.21295	0.23339		1.60214
	-65.3717	-65.2657		-64.7531	-64.3713				-64.6574	-65.3159		0.676186	0.5941																1.88088	0.722199		1.21198	0.232418		1.60117
	-65.386	-65.2506		-64.7515	-64.3625				-64.6622	-65.3298		0.948484	0.834561																1.88488	0.721231		1.21101	0.231448		1.60021
	-65.3998	-65.2347		-64.7452	-64.3492				-64.6628	-65.3431		1.28944	1.14164																1.88889	0.720265		1.21005	0.230479		1.59925
	-65.4117	-65.2196		-64.732	-64.3295				-64.6562	-65.3525		1.70987	1.52461																1.89289	0.7193		1.20909	0.229512		1.59828
	-65.4203	-65.2068		-64.7094	-64.3013				-64.6415	-65.3562		2.21887	1.99073																1.8969	0.718336		1.20813	0.228546		1.59732
	-65.4241	-65.1975		-64.6743	-64.2618				-64.6208	-65.355		2.82215	2.54363																1.9009	0.717374		1.20717	0.227582		1.59637
	-65.4213	-65.1924		-64.6231	-64.2081				-64.5995	-65.3501		3.52012	3.1816																1.9049	0.716414		1.20621	0.22662		1.59541
	-65.4091	-65.1909		-64.552	-64.1369				-64.5829	-65.3411		4.30575	3.89565																1.90891	0.715455		1.20525	0.225658		1.59445
	-65.3834	-65.1912		-64.457	-64.0449				-64.574	-65.3258		5.16257	4.66775																1.91291	0.714497		1.2043	0.224699		1.5935
	-65.3378	-65.1898		-64.3347	-63.9297				-64.5715	-65.3024		6.06298	5.46932																1.91692	0.713541		1.20334	0.223741		1.59255
	-65.2629	-65.1809		-64.1824	-63.7895				-64.5721	-65.2735		6.96711	6.26046																1.92092	0.712587		1.20239	0.222784		1.5916
	-65.1453	-65.1567		-63.9993	-63.6245				-64.5733	-65.2455		7.82279	6.99002																1.92492	0.711634		1.20144	0.221829		1.59065
	-64.9672	-65.1068		-63.7873	-63.4377				-64.5752	-65.2254		8.56658	7.59697																1.92893	0.710682		1.20049	0.220875		1.5897
	-64.7075	-65.0189		-63.5514	-63.2348				-64.5792	-65.217		9.12638	8.01308																1.93293	0.709732		1.19954	0.219923		1.58875
	-64.3426	-64.8793		-63.3008	-63.026				-64.5847	-65.2205		9.42557	8.16712																1.93694	0.708783		1.19859	0.218972		1.58781
	-63.8511	-64.675		-63.0494	-62.8254				-64.5862	-65.2327		9.38845	7.99036																1.94094	0.707836		1.19765	0.218023		1.58687
	-63.2182	-64.3962		-62.8156	-62.6514				-64.5676	-65.2419		8.94707	7.42318																1.94494	0.70689		1.19671	0.217075		1.58592
	-62.4431	-64.0394		-62.6223	-62.5261				-64.4848	-65.2075		8.04854	6.42216																1.94895	0.705946		1.19576	0.216129		1.58498
	-61.5456	-63.6117		-62.4954	-62.4743				-64.2356	-65.0283		6.66247	4.96705																1.95295	0.705003		1.19482	0.215184		1.58404
	-60.5716	-63.1335		-62.4622	-62.5214				-63.6414	-64.524		4.78757	3.06686																1.95696	0.704062		1.19388	0.214241		1.58311
	-59.5964	-62.6409		-62.5494	-62.6913				-62.497	-63.4806		2.45665	0.764152																1.96096	0.703122		1.19295	0.213299		1.58217
	-58.7216	-62.1848		-62.7798	-63.0034				-60.7145	-61.7865		-0.260775	-1.86315																1.96496	0.702184		1.19201	0.212358		1.58124
	-58.0681	-61.828		-63.1696	-63.4704				-58.4877	-59.6016		-3.25893	-4.70304																1.96897	0.701247		1.19107	0.211419		1.5803
	-57.762	-61.638		-63.7254	-64.0948				-56.3205	-57.4136		-6.3997	-7.61414																1.97297	0.700311		1.19014	0.210482		1.57937
	-57.917	-61.678		-64.4421	-64.8675				-54.8324	-55.8779		-9.51993	-10.4337																1.97698	0.699377		1.18921	0.209546		1.57844
	-58.6156	-61.9964		-65.301	-65.7662				-54.4467	-55.5047		-12.4419	-12.9885																1.98098	0.698445		1.18828	0.208611		1.57751
	-59.8913	-62.6171		-66.2696	-66.7555				-55.1969	-56.411		-14.9859	-15.1082																1.98498	0.697514		1.18735	0.207678		1.57658
	-61.7168	-63.5316		-67.3029	-67.7884				-56.7984	-58.3199		-16.985	-16.639																1.98899	0.696584		1.18642	0.206747		1.57566
	-63.9995	-64.696		-68.3456	-68.8084				-58.9122	-60.8008		-18.2982	-17.4576																1.99299	0.695656		1.18549	0.205817		1.57473
	-66.5859	-66.0329		-69.3358	-69.7544				-61.3824	-63.5579		-18.8239	-17.4829																1.997	0.694729		1.18457	0.204888		1.57381
	-69.2754	-67.4382		-70.2101	-70.5644				-64.259	-66.5358		-18.5096	-16.6849																2.001	0.693804		1.18365	0.203961		1.57289
	-71.8416	-68.7925		-70.9086	-71.1816				-67.5834	-69.7584		-17.358	-15.0894																2.00501	0.69288		1.18272	0.203035		1.57197
	-74.0576	-69.9755		-71.3804	-71.559				-71.1126	-73.0452		-15.4283	-12.7777																2.00901	0.691957		1.1818	0.202111		1.57105
	-75.723	-70.8806		-71.5881	-71.6641				-74.2419	-75.8748		-12.8329	-9.88144																2.01301	0.691036		1.18088	0.201188		1.57013
	-76.6882	-71.4283		-71.5119	-71.4821				-76.241	-77.5609		-9.72912	-6.5733																2.01702	0.690116		1.17997	0.200266		1.56921
	-76.8725	-71.5759		-71.151	-71.0176				-76.6498	-77.6286		-6.30705	-3.05322																2.02102	0.689198		1.17905	0.199346		1.5683
	-76.2733	-71.3218		-70.5247	-70.2946				-75.5218	-76.0992		-2.77466	0.467123																2.02503	0.688281		1.17813	0.198428		1.56738
	-74.9657	-70.7054		-69.6703	-69.3546				-73.3433	-73.4679		0.658689	3.7811																2.02903	0.687366		1.17722	0.19751		1.56647
	-73.0917	-69.8		-68.6401	-68.253				-70.7203	-70.4162		3.79827	6.70297																2.03303	0.686452		1.17631	0.196595		1.56556
	-70.8416	-68.7031		-67.497	-67.0546				-68.0849	-67.4823		6.47846	9.08159																2.03704	0.685539		1.1754	0.195681		1.56465
	-68.4299	-67.523		-66.3089	-65.8281				-65.6068	-64.9087		8.57403	10.8106																2.04104	0.684628		1.17449	0.194768		1.56374
	-66.0694	-66.3659		-65.1432	-64.6405				-63.3181	-62.7238		10.0075	11.8341																2.04505	0.683718		1.17358	0.193856		1.56284
	-63.9476	-65.3238		-64.0616	-63.5518				-61.308	-60.9455		10.752	12.1481																2.04905	0.68281		1.17267	0.192946		1.56193
	-62.2082	-64.4656		-63.1153	-62.6111				-59.8039	-59.7099		10.8297	11.7968																2.05305	0.681903		1.17177	0.192038		1.56103
	-60.9397	-63.8325		-62.3424	-61.8536				-59.0684	-59.2179		10.3056	10.8657																2.05706	0.680998		1.17086	0.191131		1.56012
	-60.1722	-63.4371		-61.7656	-61.2988				-59.2101	-59.5622		9.27948	9.47122																2.06106	0.680094		1.16996	0.190225		1.55922
	-59.8824	-63.2662		-61.3923	-60.9512				-60.0809	-60.6032		7.8741	7.7487																2.06507	0.679191		1.16906	0.189321		1.55832
	-60.004	-63.2869		-61.2158	-60.8013				-61.3426	-62.0031		6.22372	5.84024																2.06907	0.67829		1.16816	0.188418		1.55742
	-60.4426	-63.4538		-61.2172	-60.828				-62.6329	-63.382		4.46237	3.883																2.07307	0.67739		1.16726	0.187516		1.55653
	-61.0918	-63.7166		-61.3692	-61.0022				-63.7023	-64.472		2.7137	1.99939																2.07708	0.676491		1.16637	0.186616		1.55563
	-61.8477	-64.027		-61.6387	-61.29				-64.4544	-65.1792		1.08294	0.289645																2.08108	0.675594		1.16547	0.185718		1.55474
	-62.6206	-64.3441		-61.9911	-61.6559				-64.9071	-65.5499		-0.34857	-1.17264																2.08509	0.674698		1.16458	0.184821		1.55384
	-63.3424	-64.637		-62.3922	-62.0659				-65.1328	-65.6937		-1.52598	-2.3422																2.08909	0.673804		1.16368	0.183925		1.55295
	-63.9689	-64.8864		-62.8117	-62.49				-65.2118	-65.7185		-2.42093	-3.20107																2.09309	0.672911		1.16279	0.183031		1.55206
	-64.4792	-65.0831		-63.2242	-62.9033				-65.2094	-65.6988		-3.02933	-3.75544																2.0971	0.67202		1.1619	0.182138		1.55117
	-64.8708	-65.2267		-63.6103	-63.2869				-65.17	-65.6725		-3.36743	-4.03104																2.1011	0.671129		1.16101	0.181246		1.55028
	-65.1546	-65.3226		-63.9565	-63.6284				-65.1191	-65.6517		-3.46689	-4.06762																2.10511	0.670241		1.16013	0.180356		1.5494
	-65.3489	-65.3795		-64.2555	-63.9207				-65.0695	-65.6354		-3.36946	-3.91326																2.10911	0.669353		1.15924	0.179467		1.54851
	-65.4745	-65.4075		-64.5045	-64.1619				-65.0274	-65.6179		-3.12178	-3.61908																2.11311	0.668467		1.15835	0.17858		1.54763
	-65.5512	-65.4159		-64.7049	-64.3535				-64.9954	-65.5943		-2.77085	-3.23469																2.11712	0.667582		1.15747	0.177694		1.54675
	-65.5954	-65.4127		-64.8606	-64.5				-64.9729	-65.5625		-2.36037	-2.80473																2.12112	0.666699		1.15659	0.176809		1.54587
	-65.6196	-65.4039		-64.9774	-64.6073				-64.955	-65.5241		-1.92816	-2.36652																2.12513	0.665817		1.15571	0.175926		1.54499
	-65.6326	-65.3938		-65.0619	-64.6822				-64.936	-65.484		-1.50466	-1.94884																2.12913	0.664937		1.15483	0.175044		1.54411
	-65.6399	-65.3846		-65.1205	-64.7312				-64.9128	-65.4477		-1.11232	-1.57167																2.13313	0.664057		1.15395	0.174164		1.54323
	-65.6447	-65.3776		-65.1594	-64.7607				-64.8871	-65.42		-0.765869	-1.24674																2.13714	0.66318		1.15307	0.173285		1.54236
	-65.6488	-65.3727		-65.1838	-64.7759				-64.8624	-65.4038		-0.473121	-0.978642																2.14114	0.662303		1.1522	0.172407		1.54148
	-65.6534	-65.3697		-65.1981	-64.7815				-64.8407	-65.3996		-0.236146	-0.766237																2.14515	0.661428		1.15132	0.171531		1.54061
	-65.6591	-65.3678		-65.2057	-64.781				-64.8206	-65.4054		-0.0526165	-0.604204																2.14915	0.660554		1.15045	0.170656		1.53974
	-65.6665	-65.3664		-65.2091	-64.7769				-64.8002	-65.4173		0.0828538	-0.484565																2.15315	0.659682		1.14958	0.169783		1.53887
	-65.6758	-65.3649		-65.2101	-64.7713				-64.7795	-65.4318		0.177478	-0.39804																2.15716	0.658811		1.14871	0.168911		1.538
	-65.6875	-65.3632		-65.2099	-64.7652				-64.7624	-65.4476		0.239261	-0.335185																2.16116	0.657941		1.14784	0.16804		1.53713
	-65.7016	-65.3613		-65.2092	-64.7594				-64.7551	-65.4662		0.276187	-0.287259																2.16517	0.657073		1.14697	0.16717		1.53626
	-65.7178	-65.3595		-65.2082	-64.7543				-64.7618	-65.4903		0.295635	-0.246838																2.16917	0.656206		1.14611	0.166302		1.5354
	-65.7358	-65.3585		-65.2072	-64.7498				-64.7812	-65.5222		0.304006	-0.208165																2.17317	0.65534		1.14524	0.165436		1.53453
	-65.755	-65.3588		-65.2061	-64.746				-64.8063	-65.5614		0.306524	-0.167295																2.17718	0.654476		1.14438	0.164571		1.53367
	-65.7742	-65.3613		-65.2047	-64.7425				-64.8276	-65.604		0.307174	-0.122057																2.18118	0.653613		1.14352	0.163707		1.53281
	-65.7925	-65.3663		-65.2031	-64.7392				-64.8372	-65.643		0.308743	-0.0718801																2.18519	0.652751		1.14266	0.162844		1.53195
	-65.8088	-65.3742		-65.2011	-64.7358				-64.832	-65.6703		0.312931	-0.0175195																2.18919	0.651891		1.1418	0.161983		1.53109
	-65.8218	-65.3851		-65.1985	-64.7321				-64.8141	-65.6799		0.320498	0.0392731																2.19319	0.651032		1.14094	0.161123		1.53023
	-65.8305	-65.3988		-65.1954	-64.7282				-64.7905	-65.6698		0.331434	0.0961071																2.1972	0.650174		1.14008	0.160265		1.52938
	-65.8341	-65.4147		-65.1918	-64.7239				-64.7701	-65.6424		0.345131	0.150307																2.2012	0.649318		1.13923	0.159408		1.52852
	-65.8323	-65.4322		-65.1875	-64.7194				-64.7601	-65.6037		0.360556	0.199234																2.20521	0.648463		1.13837	0.158552		1.52767
	-65.825	-65.4506		-65.1827	-64.7147				-64.7631	-65.5603		0.376406	0.240562																2.20921	0.647609		1.13752	0.157697		1.52682
	-65.8125	-65.4692		-65.1773	-64.7101				-64.7742	-65.5177		0.391253	0.272485																2.21321	0.646757		1.13667	0.156844		1.52596
	-65.7958	-65.4875		-65.1715	-64.7057				-64.7841	-65.4791		0.403671	0.293854																2.21722	0.645906		1.13582	0.155993		1.52511
	-65.7758	-65.505		-65.1652	-64.7017				-64.7831	-65.4458		0.412342	0.304234																2.22122	0.645056		1.13497	0.155142		1.52427
	-65.7538	-65.5214		-65.1585	-64.6984				-64.7661	-65.419		0.416149	0.303894																2.22523	0.644208		1.13412	0.154293		1.52342
	-65.7311	-65.5367		-65.1514	-64.6958				-64.7346	-65.4007		0.414239	0.293736																2.22923	0.643361		1.13328	0.153446		1.52257
	-65.7087	-65.5507		-65.144	-64.6939				-64.696	-65.3937		0.406074	0.275167																2.23323	0.642515		1.13243	0.152599		1.52173
	-65.6878	-65.5634		-65.1363	-64.6928				-64.66	-65.3994		0.391455	0.249949																2.23724	0.64167		1.13159	0.151754		1.52088
	-65.6691	-65.5747		-65.1284	-64.6924				-64.6343	-65.4163		0.37053	0.220032																2.24124	0.640827		1.13074	0.150911		1.52004
	-65.653	-65.5844		-65.1204	-64.6926				-64.6213	-65.439		0.343783	0.187392																2.24525	0.639985		1.1299	0.150068		1.5192
	-65.6399	-65.5926		-65.1124	-64.6931				-64.6184	-65.4602		0.311996	0.15389																2.24925	0.639145		1.12906	0.149227		1.51836
	-65.6297	-65.5991		-65.1045	-64.6938				-64.6203	-65.4732		0.276211	0.121156																2.25325	0.638306		1.12822	0.148388		1.51752
	-65.6225	-65.6038		-65.0968	-64.6945				-64.6226	-65.475		0.237667	0.0905178																2.25726	0.637468		1.12739	0.147549		1.51669
	-65.618	-65.607		-65.0894	-64.6951				-64.6238	-65.4678		0.197738	0.0629643																2.26126	0.636631		1.12655	0.146712		1.51585
	-65.616	-65.6088		-65.0825	-64.6954				-64.6245	-65.458		0.157856	0.0391444																2.26527	0.635796		1.12572	0.145877		1.51502
	-65.6161	-65.6093		-65.0761	-64.6953				-64.6253	-65.4521		0.119446	0.019399																2.26927	0.634962		1.12488	0.145042		1.51418
	-65.6182	-65.6089		-65.0702	-64.6949				-64.6256	-65.4526		0.0838498	0.00381383																2.27327	0.634129		1.12405	0.144209		1.51335
	-65.6217	-65.6077		-65.0649	-64.694				-64.6243	-65.4572		0.0522699	-0.00771545																2.27728	0.633298		1.12322	0.143377		1.51252
	-65.6264	-65.6061		-65.06	-64.6928				-64.6214	-65.4606		0.0257125	-0.0154137																2.28128	0.632467		1.12239	0.142547		1.51169
	-65.6317	-65.6044		-65.0555	-64.6911				-64.6197	-65.46		0.00494877	-0.0195615																2.28529	0.631639		1.12156	0.141718		1.51086
	-65.6374	-65.6027		-65.0511	-64.6891				-64.6226	-65.4566		-0.00951112	-0.0204395																2.28929	0.630811		1.12073	0.14089		1.51003
	-65.6431	-65.6016		-65.0465	-64.6868				-64.6326	-65.454		-0.0174285	-0.0182867																2.29329	0.629985		1.11991	0.140063		1.50921
	-65.6486	-65.6014		-65.0416	-64.6842				-64.6492	-65.4544		-0.0188305	-0.013273																2.2973	0.62916		1.11908	0.139238		1.50838
	-65.6538	-65.6029		-65.036	-64.6814				-64.6686	-65.4567		-0.0139903	-0.00548533																2.3013	0.628336		1.11826	0.138414		1.50756
	-65.6587	-65.6063		-65.0295	-64.6782				-64.6854	-65.459		-0.00339346	0.00507344																2.30531	0.627513		1.11744	0.137592		1.50674
	-65.6637	-65.612		-65.0219	-64.6747				-64.6954	-65.4612		0.0123044	0.0184765																2.30931	0.626692		1.11661	0.136771		1.50592
	-65.6689	-65.6201		-65.0129	-64.6708				-64.6973	-65.4656		0.0323259	0.0348577																2.31331	0.625872		1.11579	0.135951		1.5051
	-65.6746	-65.6303		-65.0027	-64.6665				-64.6932	-65.4739		0.0558203	0.0543903																2.31732	0.625054		1.11498	0.135132		1.50428
	-65.6809	-65.642		-64.991	-64.6618				-64.6864	-65.4837		0.0819093	0.0772629																2.32132	0.624236		1.11416	0.134314		1.50346
	-65.6877	-65.6545		-64.9779	-64.6568				-64.6785	-65.4895		0.109723	0.103651																2.32533	0.62342		1.11334	0.133498		1.50265
	-65.6946	-65.667		-64.9638	-64.6512				-64.6683	-65.4864		0.138427	0.133687																2.32933	0.622605		1.11253	0.132684		1.50183
	-65.7014	-65.6786		-64.9487	-64.6453				-64.6541	-65.4744		0.167231	0.167425																2.33333	0.621792		1.11171	0.13187		1.50102
	-65.7073	-65.6889		-64.9329	-64.639				-64.636	-65.4586		0.195393	0.20481																2.33734	0.620979		1.1109	0.131058		1.5002
	-65.712	-65.6974		-64.9169	-64.6324				-64.618	-65.4459		0.222207	0.245639																2.34134	0.620168		1.11009	0.130247		1.49939
	-65.7151	-65.7041		-64.9009	-64.6255				-64.6061	-65.4411		0.246984	0.289534																2.34535	0.619359		1.10928	0.129437		1.49858
	-65.7167	-65.7092		-64.8852	-64.6184				-64.6056	-65.4441		0.269036	0.335911																2.34935	0.61855		1.10847	0.128629		1.49777
	-65.7171	-65.7126		-64.8702	-64.6112				-64.617	-65.4511		0.287662	0.38397																2.35335	0.617743		1.10766	0.127822		1.49697
	-65.7168	-65.7146		-64.8561	-64.6039				-64.635	-65.4563		0.302145	0.432692																2.35736	0.616937		1.10686	0.127016		1.49616
	-65.7166	-65.7151		-64.8431	-64.5966				-64.6501	-65.456		0.31176	0.480855																2.36136	0.616132		1.10605	0.126211		1.49535
	-65.7175	-65.7141		-64.8312	-64.5893				-64.6534	-65.4506		0.315806	0.527073																2.36537	0.615328		1.10525	0.125408		1.49455
	-65.7201	-65.7114		-64.8204	-64.5821				-64.6414	-65.4433		0.313642	0.569857																2.36937	0.614526		1.10445	0.124606		1.49375
	-65.725	-65.7071		-64.8105	-64.5748				-64.6165	-65.4368		0.304748	0.607689																2.37337	0.613725		1.10364	0.123805		1.49295
	-65.7324	-65.7012		-64.8016	-64.5676				-64.5854	-65.429		0.288789	0.639117																2.37738	0.612925		1.10284	0.123006		1.49215
	-65.7419	-65.6942		-64.7932	-64.5602				-64.5551	-65.4142		0.265674	0.662858																2.38138	0.612127		1.10205	0.122207		1.49135
	-65.7527	-65.6864		-64.7851	-64.5527				-64.5305	-65.3862		0.235621	0.677903																2.38539	0.611329		1.10125	0.12141		1.49055
	-65.7638	-65.6786		-64.777	-64.545				-64.5134	-65.3435		0.199194	0.683608																2.38939	0.610533		1.10045	0.120615		1.48975
	-65.7738	-65.6715		-64.7686	-64.537				-64.5027	-65.2917		0.157327	0.679778																2.39339	0.609738		1.09966	0.11982		1.48896
	-65.7815	-65.6654		-64.7597	-64.5286				-64.496	-65.2416		0.11132	0.666724																2.3974	0.608945		1.09886	0.119027		1.48816
	-65.7855	-65.6609		-64.7501	-64.5198				-64.4913	-65.204		0.0628015	0.645283																2.4014	0.608152		1.09807	0.118235		1.48737
	-65.785	-65.6578		-64.7395	-64.5106				-64.4881	-65.1846		0.0136682	0.616814																2.40541	0.607361		1.09728	0.117445		1.48658
	-65.7794	-65.6561		-64.7279	-64.501				-64.4879	-65.1813		-0.0340031	0.583158																2.40941	0.606571		1.09649	0.116655		1.48579
	-65.7687	-65.6552		-64.7154	-64.491				-64.4924	-65.1857		-0.0780623	0.546555																2.41341	0.605782		1.0957	0.115867		1.485
	-65.7532	-65.6546		-64.7018	-64.4806				-64.5025	-65.1875		-0.116405	0.509549																2.41742	0.604995		1.09491	0.11508		1.48421
	-65.7334	-65.6535		-64.6874	-64.4699				-64.5172	-65.1801		-0.147092	0.47486																2.42142	0.604209		1.09412	0.114294		1.48342
	-65.7101	-65.6513		-64.6723	-64.4588				-64.5342	-65.1646		-0.168465	0.445241																2.42543	0.603424		1.09334	0.11351		1.48263
	-65.6841	-65.6475		-64.6567	-64.4474				-64.5512	-65.1489		-0.179241	0.42334																2.42943	0.60264		1.09255	0.112727		1.48185
	-65.6562	-65.6418		-64.6407	-64.4358				-64.5677	-65.1433		-0.178589	0.411556																2.43343	0.601857		1.09177	0.111945		1.48107
	-65.6271	-65.634		-64.6246	-64.4237				-64.5858	-65.1534		-0.166174	0.411907																2.43744	0.601076		1.09099	0.111164		1.48028
	-65.5975	-65.6243		-64.6086	-64.4113				-64.608	-65.1764		-0.142169	0.425922																2.44144	0.600295		1.09021	0.110384		1.4795
	-65.5678	-65.613		-64.5928	-64.3984				-64.634	-65.2028		-0.107237	0.454551																2.44545	0.599517		1.08943	0.109606		1.47872
	-65.5384	-65.6008		-64.5774	-64.3849				-64.659	-65.2223		-0.0624832	0.498111																2.44945	0.598739		1.08865	0.108829		1.47794
	-65.5094	-65.5883		-64.5624	-64.3707				-64.6764	-65.2293		-0.00937641	0.556256																2.45345	0.597962		1.08787	0.108053		1.47716
	-65.4809	-65.5764		-64.5479	-64.3557				-64.6814	-65.2245		0.0503406	0.627989																2.45746	0.597187		1.08709	0.107279		1.47639
	-65.4526	-65.566		-64.5338	-64.3398				-64.6736	-65.2121		0.114757	0.711703																2.46146	0.596413		1.08632	0.106505		1.47561
	-65.4243	-65.5577		-64.5203	-64.3227				-64.6562	-65.1972		0.1819	0.805256																2.46547	0.59564		1.08555	0.105733		1.47484
	-65.3954	-65.5521		-64.5071	-64.3045				-64.6335	-65.183		0.24984	0.906077																2.46947	0.594868		1.08477	0.104962		1.47406
	-65.3653	-65.5494		-64.4941	-64.2849				-64.6097	-65.1709		0.316783	1.01129																2.47347	0.594097		1.084	0.104193		1.47329
	-65.3337	-65.5495		-64.4813	-64.2639				-64.5883	-65.1603		0.381148	1.11787																2.47748	0.593328		1.08323	0.103424		1.47252
	-65.2999	-65.5521		-64.4685	-64.2414				-64.5711	-65.1489		0.441626	1.22277																2.48148	0.59256		1.08246	0.102657		1.47175
	-65.264	-65.5567		-64.4555	-64.2174				-64.5578	-65.1321		0.497221	1.32312																2.48549	0.591793		1.08169	0.101891		1.47098
	-65.226	-65.5623		-64.4422	-64.1921				-64.5469	-65.1037		0.547271	1.41631																2.48949	0.591027		1.08093	0.101126		1.47021
	-65.1862	-65.5683		-64.4284	-64.1654				-64.5374	-65.0584		0.591451	1.50019																2.49349	0.590262		1.08016	0.100363		1.46945
	-65.1453	-65.5735		-64.414	-64.1375				-64.5293	-64.995		0.629761	1.57307																2.4975	0.589499		1.0794	0.0996001		1.46868
	-65.1038	-65.5774		-64.3988	-64.1086				-64.5222	-64.9185		0.662494	1.63387																2.5015	0.588736		1.07863	0.0988389		1.46792
	-65.0623	-65.579		-64.3828	-64.079				-64.5134	-64.8382		0.690203	1.68212																2.50551	0.587975		1.07787	0.0980789		1.46715
	-65.0209	-65.5778		-64.3658	-64.0488				-64.4976	-64.765		0.713647	1.71792																2.50951	0.587216		1.07711	0.0973201		1.46639
	-64.9795	-65.5735		-64.3479	-64.0184				-64.4712	-64.7073		0.733737	1.74194																2.51351	0.586457		1.07635	0.0965625		1.46563
	-64.9375	-65.5658		-64.329	-63.988				-64.4355	-64.669		0.751467	1.75533																2.51752	0.585699		1.07559	0.0958061		1.46487
	-64.8938	-65.5547		-64.3092	-63.9579				-64.3983	-64.6486		0.767849	1.75965																2.52152	0.584943		1.07483	0.0950509		1.46411
	-64.8473	-65.5405		-64.2884	-63.9282				-64.3693	-64.6399		0.783845	1.75673																2.52553	0.584188		1.07408	0.0942969		1.46336
	-64.7967	-65.5238		-64.2666	-63.8991				-64.3545	-64.6338		0.800298	1.74865																2.52953	0.583434		1.07332	0.0935441		1.4626
	-64.741	-65.505		-64.244	-63.8706				-64.3524	-64.6222		0.817875	1.73755																2.53353	0.582681		1.07257	0.0927925		1.46185
	-64.6797	-65.485		-64.2204	-63.8427				-64.3558	-64.5996		0.837022	1.7256																2.53754	0.581929		1.07182	0.092042		1.46109
	-64.6126	-65.4646		-64.1959	-63.8153				-64.358	-64.5644		0.857932	1.71491																2.54154	0.581179		1.07106	0.0912928		1.46034
	-64.5403	-65.4446		-64.1703	-63.7882				-64.3569	-64.5179		0.880542	1.70747																2.54555	0.580429		1.07031	0.0905447		1.45959
	-64.4637	-65.4256		-64.1435	-63.761				-64.3538	-64.4637		0.904541	1.70505																2.54955	0.579681		1.06956	0.0897978		1.45884
	-64.3842	-65.408		-64.1153	-63.7335				-64.3491	-64.4085		0.92941	1.70921																2.55355	0.578934		1.06882	0.0890521		1.45809
	-64.3035	-65.3919		-64.0856	-63.7053				-64.3396	-64.3599		0.954475	1.72122																2.55756	0.578188		1.06807	0.0883076		1.45734
	-64.2232	-65.3771		-64.0541	-63.6761				-64.32	-64.3247		0.978979	1.74199																2.56156	0.577443		1.06732	0.0875642		1.45659
	-64.1449	-65.3632		-64.0205	-63.6454				-64.2874	-64.3057		1.00216	1.7721																2.56557	0.5767		1.06658	0.086822		1.45585
	-64.07	-65.3493		-63.9847	-63.6129				-64.2442	-64.2993		1.02334	1.81172																2.56957	0.575957		1.06583	0.086081		1.4551
	-63.9997	-65.3348		-63.9466	-63.5786				-64.1976	-64.2971		1.04195	1.86059																2.57357	0.575216		1.06509	0.0853412		1.45436
	-63.9346	-65.3189		-63.906	-63.5421				-64.155	-64.2893		1.05765	1.91804																2.57758	0.574476		1.06435	0.0846025		1.45361
	-63.8749	-65.301		-63.8628	-63.5036				-64.1212	-64.2698		1.07032	1.98297																2.58158	0.573737		1.06361	0.083865		1.45287
	-63.8204	-65.2807		-63.8171	-63.4631				-64.0965	-64.2385		1.08006	2.05391																2.58559	0.572999		1.06287	0.0831287		1.45213
	-63.7705	-65.2581		-63.7688	-63.4207				-64.0777	-64.1995		1.08719	2.12907																2.58959	0.572263		1.06213	0.0823935		1.45139
	-63.7241	-65.2333		-63.7183	-63.3766				-64.0606	-64.1568		1.09221	2.20646																2.59359	0.571527		1.06139	0.0816595		1.45065
	-63.6801	-65.2069		-63.6656	-63.3313				-64.0428	-64.1108		1.09572	2.28392																2.5976	0.570793		1.06066	0.0809266		1.44992
	-63.6372	-65.1796		-63.611	-63.285				-64.0245	-64.0594		1.09836	2.35934																2.6016	0.570059		1.05992	0.0801949		1.44918
	-63.594	-65.152		-63.5548	-63.2379				-64.0077	-64.0011		1.10075	2.43068																2.60561	0.569327		1.05919	0.0794644		1.44845
	-63.5493	-65.1249		-63.4973	-63.1906				-63.9941	-63.9366		1.1034	2.49616																2.60961	0.568596		1.05846	0.078735		1.44771
	-63.5024	-65.0988		-63.4389	-63.1432				-63.983	-63.8681		1.10664	2.55434																2.61361	0.567866		1.05773	0.0780067		1.44698
	-63.4526	-65.0742		-63.3798	-63.0959				-63.9717	-63.7965		1.1106	2.60417																2.61762	0.567138		1.057	0.0772797		1.44625
	-63.3996	-65.0511		-63.3205	-63.049				-63.9566	-63.722		1.11518	2.64506																2.62162	0.56641		1.05627	0.0765537		1.44552
	-63.3436	-65.0299		-63.2614	-63.0027				-63.9355	-63.6456		1.12002	2.67688																2.62563	0.565684		1.05554	0.0758289		1.44479
	-63.2852	-65.0103		-63.2027	-62.9569				-63.9085	-63.5713		1.12456	2.69995																2.62963	0.564958		1.05481	0.0751053		1.44406
	-63.2251	-64.9923		-63.1447	-62.9117				-63.8776	-63.5043		1.12807	2.71497																2.63363	0.564234		1.05409	0.0743827		1.44333
	-63.1644	-64.9757		-63.0876	-62.8671				-63.846	-63.4486		1.12968	2.72292																2.63764	0.563511		1.05336	0.0736614		1.44261
	-63.1042	-64.9599		-63.0317	-62.8229				-63.8172	-63.404		1.12848	2.72505																2.64164	0.562789		1.05264	0.0729411		1.44188
	-63.0455	-64.9446		-62.977	-62.779				-63.7929	-63.3668		1.12361	2.72269																2.64565	0.562068		1.05191	0.072222		1.44116
	-62.9891	-64.9292		-62.9235	-62.7354				-63.7729	-63.3316		1.11432	2.71722																2.64965	0.561348		1.05119	0.0715041		1.44043
	-62.9355	-64.9129		-62.8713	-62.6918				-63.7543	-63.2926		1.10006	2.70994																2.65365	0.56063		1.05047	0.0707872		1.43971
	-62.8849	-64.895		-62.8201	-62.6481				-63.7333	-63.2454		1.08056	2.70203																2.65766	0.559912		1.04975	0.0700715		1.43899
	-62.8369	-64.8748		-62.7698	-62.604				-63.7076	-63.1884		1.05589	2.6945																2.66166	0.559196		1.04903	0.069357		1.43827
	-62.7907	-64.8518		-62.7202	-62.5596				-63.6774	-63.1243		1.02646	2.68812																2.66567	0.558481		1.04832	0.0686435		1.43755
	-62.7454	-64.8259		-62.6711	-62.5145				-63.6442	-63.0597		0.993095	2.68342																2.66967	0.557766		1.0476	0.0679312		1.43684
	-62.6999	-64.7972		-62.6222	-62.4688				-63.6098	-63.0011		0.956942	2.68071																2.67367	0.557053		1.04689	0.06722		1.43612
	-62.6532	-64.7662		-62.5732	-62.4224				-63.5753	-62.9506		0.919468	2.68002																2.67768	0.556341		1.04617	0.0665099		1.4354
	-62.6043	-64.7337		-62.524	-62.3751				-63.542	-62.9049		0.882362	2.68117																2.68168	0.55563		1.04546	0.065801		1.43469
	-62.5525	-64.7006		-62.4745	-62.327				-63.5121	-62.8581		0.847436	2.68376																2.68569	0.554921		1.04475	0.0650931		1.43398
	-62.4977	-64.6678		-62.4245	-62.278				-63.4889	-62.8064		0.816501	2.6872																2.68969	0.554212		1.04404	0.0643864		1.43326
	-62.4397	-64.636		-62.374	-62.2282				-63.4768	-62.7506		0.791249	2.69073																2.69369	0.553504		1.04333	0.0636808		1.43255
	-62.3788	-64.6057		-62.3231	-62.1775				-63.4781	-62.6944		0.773126	2.69345																2.6977	0.552798		1.04262	0.0629763		1.43184
	-62.3155	-64.577		-62.2718	-62.1259				-63.4921	-62.6413		0.76323	2.69437																2.7017	0.552093		1.04191	0.0622729		1.43113
	-62.2503	-64.5498		-62.22	-62.0735				-63.514	-62.5923		0.762237	2.69248																2.70571	0.551388		1.04121	0.0615706		1.43043
	-62.1839	-64.5239		-62.1679	-62.0202				-63.5372	-62.5461		0.770357	2.68673																2.70971	0.550685		1.0405	0.0608694		1.42972
	-62.1168	-64.4989		-62.1155	-61.9661				-63.5548	-62.4999		0.787333	2.67619																2.71371	0.549983		1.0398	0.0601693		1.42901
	-62.0496	-64.4744		-62.0627	-61.9113				-63.5608	-62.4501		0.812474	2.66005																2.71772	0.549282		1.03909	0.0594704		1.42831
	-61.9828	-64.4502		-62.0096	-61.8556				-63.5518	-62.3931		0.844733	2.63769																2.72172	0.548582		1.03839	0.0587725		1.42761
	-61.9166	-64.4259		-61.9558	-61.7992				-63.5275	-62.3266		0.882799	2.60879																2.72573	0.547883		1.03769	0.0580757		1.4269
	-61.8513	-64.4016		-61.9014	-61.7422				-63.4912	-62.2513		0.925212	2.57332																2.72973	0.547186		1.03699	0.05738		1.4262
	-61.7869	-64.377		-61.8461	-61.6846				-63.4484	-62.171		0.97048	2.53161																2.73373	0.546489		1.03629	0.0566854		1.4255
	-61.7232	-64.352		-61.7897	-61.6267				-63.4045	-62.0927		1.01719	2.48435																2.73774	0.545793		1.03559	0.0559919		1.4248
	-61.6603	-64.3262		-61.732	-61.5684				-63.3632	-62.024		1.06407	2.43258																2.74174	0.545099		1.0349	0.0552995		1.4241
	-61.5978	-64.2994		-61.6729	-61.5101				-63.3269	-61.9702		1.1101	2.37765																2.74575	0.544405		1.0342	0.0546082		1.42341
	-61.5357	-64.2711		-61.6124	-61.4518				-63.2972	-61.9318		1.15449	2.32117																2.74975	0.543713		1.03351	0.053918		1.42271
	-61.4737	-64.2407		-61.5502	-61.3937				-63.275	-61.9045		1.19668	2.26492																2.75375	0.543022		1.03281	0.0532289		1.42202
	-61.4117	-64.2078		-61.4865	-61.336				-63.2592	-61.881		1.23634	2.21075																2.75776	0.542332		1.03212	0.0525408		1.42132
	-61.3499	-64.1722		-61.4213	-61.2788				-63.2462	-61.8543		1.27333	2.16048																2.76176	0.541642		1.03143	0.0518538		1.42063
	-61.2883	-64.1339		-61.3549	-61.2222				-63.2313	-61.8198		1.3076	2.11577																2.76577	0.540954		1.03074	0.0511679		1.41994
	-61.2274	-64.0929		-61.2875	-61.1664				-63.2113	-61.7771		1.33916	2.07804																2.76977	0.540267		1.03005	0.0504831		1.41925
	-61.1677	-64.0498		-61.2193	-61.1113				-63.1863	-61.7302		1.36807	2.04836																2.77377	0.539581		1.02936	0.0497994		1.41856
	-61.1099	-64.0051		-61.1506	-61.057				-63.1591	-61.6859		1.39433	2.02737																2.77778	0.538897		1.02868	0.0491167		1.41787
	-61.0548	-63.9593		-61.0818	-61.0036				-63.133	-61.6506		1.41797	2.01524																2.78178	0.538213		1.02799	0.0484351		1.41718
	-61.003	-63.913		-61.0131	-60.9509				-63.1087	-61.6273		1.43895	2.01164																2.78579	0.53753		1.02731	0.0477546		1.41649
	-60.9549	-63.8663		-60.9449	-60.899				-63.0832	-61.6134		1.45725	2.01574																2.78979	0.536848		1.02662	0.0470751		1.41581
	-60.9106	-63.8194		-60.8773	-60.8477				-63.0516	-61.6022		1.47288	2.02625																2.79379	0.536168		1.02594	0.0463967		1.41512
	-60.8699	-63.772		-60.8105	-60.797				-63.0104	-61.5856		1.48587	2.04147																2.7978	0.535488		1.02526	0.0457194		1.41444
	-60.8319	-63.7237		-60.7446	-60.7468				-62.9612	-61.5574		1.49634	2.0594																2.8018	0.53481		1.02458	0.0450432		1.41376
	-60.7954	-63.6741		-60.6796	-60.6971				-62.9101	-61.5145		1.50445	2.07783																2.80581	0.534132		1.0239	0.044368		1.41307
	-60.7588	-63.6229		-60.6154	-60.6477				-62.8635	-61.4572		1.51044	2.09447																2.80981	0.533456		1.02322	0.0436938		1.41239
	-60.7204	-63.5701		-60.5519	-60.5987				-62.8251	-61.3896		1.51461	2.10711																2.81381	0.53278		1.02254	0.0430207		1.41171
	-60.6785	-63.516		-60.4889	-60.5499				-62.7946	-61.319		1.51725	2.11371																2.81782	0.532106		1.02186	0.0423487		1.41104
	-60.6318	-63.4614		-60.4261	-60.5013				-62.7702	-61.2538		1.51865	2.11256																2.82182	0.531433		1.02119	0.0416777		1.41036
	-60.5793	-63.4073		-60.3634	-60.4528				-62.7514	-61.2		1.51907	2.10236																2.82583	0.53076		1.02051	0.0410078		1.40968
	-60.5207	-63.3549		-60.3003	-60.4046				-62.7383	-61.1579		1.51868	2.08237																2.82983	0.530089		1.01984	0.0403389		1.40901
	-60.4564	-63.3053		-60.2367	-60.3564				-62.7293	-61.122		1.51761	2.05241																2.83383	0.529419		1.01917	0.0396711		1.40833
	-60.3876	-63.2597		-60.1723	-60.3084				-62.7196	-61.0833		1.51593	2.01289																2.83784	0.52875		1.0185	0.0390044		1.40766
	-60.3156	-63.2187		-60.1069	-60.2604				-62.7027	-61.0346		1.51368	1.96483																2.84184	0.528082		1.01782	0.0383386		1.40699
	-60.2425	-63.1823		-60.0405	-60.2125				-62.6736	-60.9741		1.51095	1.9098																2.84585	0.527415		1.01716	0.0376739		1.40631
	-60.1702	-63.1503		-59.9729	-60.1646				-62.632	-60.9064		1.50787	1.8498																2.84985	0.526749		1.01649	0.0370103		1.40564
	-60.1007	-63.1216		-59.9042	-60.1167				-62.5819	-60.8409		1.5047	1.78718																2.85385	0.526084		1.01582	0.0363477		1.40498
	-60.0356	-63.095		-59.8344	-60.0688				-62.5293	-60.7877		1.50186	1.72448																2.85786	0.52542		1.01515	0.0356861		1.40431
	-59.9759	-63.0689		-59.7638	-60.0209				-62.4785	-60.7535		1.49993	1.66428																2.86186	0.524757		1.01449	0.0350256		1.40364
	-59.9223	-63.0419		-59.6925	-59.9729				-62.4316	-60.739		1.49963	1.60903																2.86587	0.524095		1.01382	0.0343661		1.40297
	-59.8747	-63.0126		-59.6206	-59.9249				-62.3894	-60.739		1.50179	1.5609																2.86987	0.523434		1.01316	0.0337076		1.40231
	-59.8325	-62.9802		-59.5485	-59.8769				-62.3534	-60.7456		1.5073	1.52166																2.87387	0.522774		1.0125	0.0330502		1.40164
	-59.7947	-62.9445		-59.4761	-59.8288				-62.3259	-60.7518		1.51695	1.49252																2.87788	0.522115		1.01184	0.0323938		1.40098
	-59.7601	-62.9058		-59.4038	-59.7806				-62.309	-60.7532		1.53141	1.47414																2.88188	0.521458		1.01118	0.0317384		1.40032
	-59.727	-62.8649		-59.3316	-59.7325				-62.3028	-60.7468		1.55106	1.46653																2.88589	0.520801		1.01052	0.0310841		1.39966
	-59.6938	-62.8231		-59.2595	-59.6844				-62.304	-60.7301		1.57595	1.46909																2.88989	0.520145		1.00986	0.0304307		1.399
	-59.6593	-62.7815		-59.1876	-59.6364				-62.3063	-60.7021		1.60569	1.48066																2.89389	0.51949		1.0092	0.0297784		1.39834
	-59.6223	-62.741		-59.1159	-59.5884				-62.3018	-60.6641		1.6395	1.4996																2.8979	0.518837		1.00855	0.0291271		1.39768
	-59.5821	-62.7024		-59.0443	-59.5405				-62.2848	-60.6205		1.67617	1.52388																2.9019	0.518184		1.00789	0.0284769		1.39702
	-59.5385	-62.6657		-58.9729	-59.4927				-62.2536	-60.5779		1.71414	1.55123																2.90591	0.517532		1.00724	0.0278276		1.39637
	-59.492	-62.6305		-58.9015	-59.445				-62.2113	-60.5415		1.75163	1.57927																2.90991	0.516881		1.00658	0.0271794		1.39571
	-59.443	-62.596		-58.8303	-59.3974				-62.1634	-60.5129		1.78673	1.60562																2.91391	0.516232		1.00593	0.0265322		1.39506
	-59.3928	-62.5612		-58.7593	-59.3499				-62.1142	-60.4879		1.81759	1.62804																2.91792	0.515583		1.00528	0.0258859		1.3944
	-59.3422	-62.5252		-58.6884	-59.3025				-62.0645	-60.4588		1.84251	1.64451																2.92192	0.514935		1.00463	0.0252407		1.39375
	-59.2925	-62.4872		-58.6178	-59.2551				-62.0115	-60.4186		1.86012	1.65333																2.92593	0.514289		1.00398	0.0245965		1.3931
	-59.2445	-62.447		-58.5475	-59.2079				-61.9518	-60.3653		1.86944	1.65316																2.92993	0.513643		1.00333	0.0239534		1.39245
	-59.1988	-62.4045		-58.4776	-59.1609				-61.8851	-60.3035		1.86996	1.64308																2.93393	0.512998		1.00269	0.0233112		1.3918
	-59.1558	-62.3604		-58.4081	-59.1142				-61.815	-60.242		1.86167	1.62259																2.93794	0.512355		1.00204	0.02267		1.39115
	-59.1156	-62.3151		-58.3393	-59.0678				-61.7489	-60.1897		1.84499	1.5916																2.94194	0.511712		1.00139	0.0220298		1.39051
	-59.0781	-62.2694		-58.2712	-59.022				-61.6941	-60.151		1.82075	1.55046																2.94595	0.51107		1.00075	0.0213906		1.38986
	-59.043	-62.224		-58.2039	-58.9768				-61.656	-60.1249		1.79008	1.49989																2.94995	0.51043		1.00011	0.0207524		1.38922
	-59.0103	-62.1793		-58.1376	-58.9324				-61.6361	-60.1071		1.75432	1.44099																2.95395	0.50979		0.999465	0.0201152		1.38857
	-58.9798	-62.1353		-58.0723	-58.8889				-61.6308	-60.0922		1.71488	1.37519																2.95796	0.509151		0.998824	0.019479		1.38793
	-58.9515	-62.092		-58.0081	-58.8465				-61.6329	-60.075		1.67317	1.30418																2.96196	0.508514		0.998183	0.0188438		1.38729
	-58.9253	-62.0488		-57.9453	-58.8053				-61.6334	-60.0513		1.6305	1.2299																2.96597	0.507877		0.997544	0.0182096		1.38664
	-58.9013	-62.0053		-57.8838	-58.7653				-61.6235	-60.0188		1.58803	1.15444																2.96997	0.507241		0.996906	0.0175764		1.386
	-58.8794	-61.9609		-57.8239	-58.7265				-61.5967	-59.978		1.54668	1.07999																2.97397	0.506606		0.996269	0.0169441		1.38537
	-58.8594	-61.9153		-57.7656	-58.689				-61.5501	-59.9328		1.50721	1.00869																2.97798	0.505973		0.995632	0.0163129		1.38473
	-58.8407	-61.8682		-57.7089	-58.6525				-61.4877	-59.8902		1.47014	0.942593																2.98198	0.50534		0.994997	0.0156826		1.38409
	-58.8226	-61.8196		-57.6538	-58.617				-61.4205	-59.8583		1.4358	0.88352																2.98599	0.504708		0.994363	0.0150533		1.38345
	-58.8042	-61.7698		-57.6003	-58.5824				-61.3635	-59.8453		1.40439	0.832953																2.98999	0.504077		0.993729	0.014425		1.38282
	-58.7847	-61.7193		-57.5482	-58.5484				-61.3286	-59.8558		1.37597	0.791947																2.99399	0.503447		0.993097	0.0137977		1.38218
	-58.7631	-61.6689		-57.4975	-58.5148				-61.3183	-59.8875		1.35055	0.761046																2.998	0.502819		0.992466	0.0131713		1.38155
	-58.7391	-61.6193		-57.448	-58.4816				-61.3243	-59.9289		1.32807	0.740232																3.002	0.502191		0.991835	0.0125459		1.38092
	-58.7124	-61.5714		-57.3995	-58.4486				-61.3336	-59.9626		1.30849	0.728919																3.00601	0.501564		0.991206	0.0119215		1.38029
	-58.6836	-61.526		-57.3518	-58.4156				-61.3348	-59.974		1.29175	0.725976																3.01001	0.500938		0.990577	0.0112981		1.37966
	-58.6534	-61.4835		-57.3047	-58.3827				-61.3224	-59.9595		1.27789	0.729802																3.01401	0.500313		0.98995	0.0106756		1.37903
	-58.623	-61.4442		-57.2582	-58.3498				-61.2962	-59.9275		1.26697	0.738436																3.01802	0.499689		0.989323	0.0100541		1.3784
	-58.5939	-61.4083		-57.2122	-58.3169				-61.2584	-59.892		1.25913	0.749697																3.02202	0.499066		0.988698	0.00943358		1.37777
	-58.5675	-61.3752		-57.1667	-58.284				-61.2125	-59.863		1.2546	0.761352																3.02603	0.498444		0.988073	0.00881401		1.37714
	-58.545	-61.3447		-57.1216	-58.2511				-61.1633	-59.842		1.25365	0.771281																3.03003	0.497823		0.98745	0.0081954		1.37652
	-58.5272	-61.3159		-57.0771	-58.2183				-61.1175	-59.8233		1.25663	0.777639																3.03403	0.497202		0.986827	0.00757775		1.37589
	-58.5145	-61.2882		-57.0333	-58.1856				-61.082	-59.7996		1.26385	0.778991																3.03804	0.496583		0.986205	0.00696107		1.37527
	-58.5065	-61.2609		-56.9903	-58.153				-61.0607	-59.7668		1.27562	0.774418																3.04204	0.495965		0.985585	0.00634533		1.37465
	-58.5024	-61.2334		-56.9483	-58.1205				-61.0516	-59.726		1.29216	0.763572																3.04605	0.495348		0.984965	0.00573056		1.37403
	-58.501	-61.2051		-56.9075	-58.0882				-61.0482	-59.6815		1.31353	0.746686																3.05005	0.494731		0.984346	0.00511674		1.37341
	-58.5007	-61.1757		-56.8678	-58.0562				-61.043	-59.6392		1.33963	0.724542																3.05405	0.494116		0.983728	0.00450387		1.37279
	-58.4999	-61.1449		-56.8294	-58.0244				-61.0316	-59.6057		1.37009	0.698382																3.05806	0.493502		0.983111	0.00389195		1.37217
	-58.4971	-61.1125		-56.7923	-57.9931				-61.0136	-59.5875		1.4043	0.669801																3.06206	0.492888		0.982496	0.00328098		1.37155
	-58.4913	-61.0786		-56.7565	-57.9623				-60.9917	-59.5883		1.44139	0.64061																3.06607	0.492276		0.981881	0.00267096		1.37093
	-58.4819	-61.043		-56.7219	-57.9322				-60.9688	-59.606		1.48025	0.612684																3.07007	0.491664		0.981267	0.00206189		1.37032
	-58.4685	-61.006		-56.6884	-57.903				-60.9453	-59.6315		1.51958	0.587822																3.07407	0.491054		0.980653	0.00145376		1.3697
	-58.4517	-60.9677		-56.6558	-57.8747				-60.9185	-59.6527		1.55797	0.567614																3.07808	0.490444		0.980041	0.000846569		1.36909
	-58.4317	-60.9285		-56.6242	-57.8474				-60.8846	-59.6599		1.59398	0.553334																3.08208	0.489835		0.97943	0.000240321		1.36847
	-58.4095	-60.889		-56.5933	-57.8214				-60.8414	-59.6502		1.62626	0.54585																3.08609	0.489228		0.97882	-0.000364987		1.36786
	-58.3856	-60.8498		-56.5632	-57.7966				-60.7908	-59.6278		1.65364	0.545586																3.09009	0.488621		0.978211	-0.000969359		1.36725
	-58.3605	-60.8116		-56.5338	-57.773				-60.7373	-59.6023		1.67522	0.552493																3.09409	0.488015		0.977602	-0.00157279		1.36664
	-58.3347	-60.7753		-56.505	-57.7505				-60.6861	-59.584		1.69045	0.566065																3.0981	0.48741		0.976995	-0.0021753		1.36603
	-58.3084	-60.7415		-56.4771	-57.7291				-60.6398	-59.5787		1.69917	0.585376																3.1021	0.486806		0.976389	-0.00277686		1.36542
	-58.282	-60.7109		-56.4499	-57.7086				-60.5979	-59.5845		1.70163	0.60914																3.10611	0.486203		0.975783	-0.0033775		1.36481
	-58.2559	-60.6839		-56.4237	-57.6887				-60.5573	-59.5929		1.69848	0.635791																3.11011	0.485601		0.975179	-0.00397721		1.36421
	-58.2307	-60.6606		-56.3986	-57.6692				-60.5152	-59.5936		1.69065	0.663572																3.11411	0.484999		0.974575	-0.00457599		1.3636
	-58.2073	-60.6408		-56.3746	-57.6501				-60.4713	-59.5807		1.67936	0.690637																3.11812	0.484399		0.973972	-0.00517385		1.363
	-58.1868	-60.624		-56.3518	-57.6309				-60.4286	-59.5557		1.66591	0.715157																3.12212	0.4838		0.973371	-0.00577078		1.36239
	-58.1702	-60.6094		-56.3305	-57.6117				-60.3918	-59.5258		1.65164	0.735418																3.12613	0.483201		0.97277	-0.00636679		1.36179
	-58.1586	-60.5961		-56.3106	-57.5923				-60.3649	-59.4987		1.63776	0.749923																3.13013	0.482604		0.97217	-0.00696188		1.36119
	-58.1525	-60.5831		-56.2923	-57.5727				-60.349	-59.4779		1.62525	0.757476																3.13413	0.482007		0.971571	-0.00755604		1.36059
	-58.1521	-60.5694		-56.2757	-57.5529				-60.3411	-59.461		1.61478	0.757253																3.13814	0.481412		0.970973	-0.00814929		1.35999
	-58.1568	-60.5543		-56.2608	-57.533				-60.3356	-59.4415		1.60661	0.748854																3.14214	0.480817		0.970376	-0.00874163		1.35939
	-58.1657	-60.5376		-56.2477	-57.5131				-60.3259	-59.4136		1.60061	0.732325																3.14615	0.480223		0.96978	-0.00933305		1.35879
	-58.1775	-60.5192		-56.2363	-57.4935				-60.3072	-59.377		1.59622	0.708157																3.15015	0.47963		0.969184	-0.00992356		1.3582
	-58.1906	-60.4994		-56.2268	-57.4742				-60.2784	-59.337		1.59254	0.677259																3.15415	0.479039		0.96859	-0.0105132		1.3576
	-58.2035	-60.4788		-56.219	-57.4553				-60.2402	-59.3017		1.58835	0.640892																3.15816	0.478447		0.967997	-0.0111018		1.357
	-58.215	-60.4582		-56.213	-57.4371				-60.1949	-59.2772		1.58224	0.600596																3.16216	0.477857		0.967404	-0.0116896		1.35641
	-58.2242	-60.4383		-56.2086	-57.4195				-60.1455	-59.2653		1.57273	0.558086																3.16617	0.477268		0.966813	-0.0122765		1.35582
	-58.2308	-60.4196		-56.2057	-57.4026				-60.0959	-59.264		1.55839	0.515144																3.17017	0.47668		0.966222	-0.0128625		1.35522
	-58.2348	-60.4026		-56.2042	-57.3865				-60.0506	-59.2694		1.53797	0.473511																3.17417	0.476093		0.965633	-0.0134475		1.35463
	-58.2367	-60.3875		-56.2037	-57.371				-60.0122	-59.2782		1.5105	0.434786																3.17818	0.475506		0.965044	-0.0140317		1.35404
	-58.2372	-60.3739		-56.2042	-57.3561				-59.9801	-59.2885		1.47541	0.400347																3.18218	0.474921		0.964456	-0.014615		1.35345
	-58.2368	-60.3615		-56.2052	-57.3416				-59.9504	-59.2995		1.4326	0.371289																3.18619	0.474336		0.963869	-0.0151973		1.35286
	-58.2363	-60.3497		-56.2065	-57.3275				-59.9184	-59.3096		1.38247	0.348399																3.19019	0.473752		0.963283	-0.0157788		1.35228
	-58.236	-60.3379		-56.2078	-57.3136				-59.8818	-59.3163		1.32593	0.332156																3.19419	0.473169		0.962698	-0.0163594		1.35169
	-58.236	-60.3254		-56.2089	-57.2999				-59.8415	-59.3176		1.2644	0.322759																3.1982	0.472587		0.962114	-0.016939		1.3511
	-58.236	-60.3116		-56.2095	-57.2863				-59.8012	-59.3127		1.1997	0.320179																3.2022	0.472006		0.961531	-0.0175178		1.35052
	-58.2354	-60.296		-56.2094	-57.2728				-59.765	-59.3031		1.134	0.324216																3.20621	0.471426		0.960948	-0.0180957		1.34993
	-58.2335	-60.2781		-56.2085	-57.2593				-59.7355	-59.2908		1.06967	0.334574																3.21021	0.470847		0.960367	-0.0186727		1.34935
	-58.2293	-60.2579		-56.2066	-57.246				-59.7125	-59.2776		1.00916	0.350914																3.21421	0.470269		0.959786	-0.0192489		1.34877
	-58.2221	-60.2354		-56.2036	-57.2328				-59.6954	-59.2642		0.954817	0.372901																3.21822	0.469691		0.959207	-0.0198241		1.34819
	-58.2112	-60.2108		-56.1996	-57.22				-59.6849	-59.2512		0.90877	0.40023																3.22222	0.469115		0.958628	-0.0203984		1.34761
	-58.1963	-60.1845		-56.1945	-57.2075				-59.6835	-59.2392		0.872751	0.432624																3.22623	0.468539		0.95805	-0.0209719		1.34703
	-58.1775	-60.157		-56.1884	-57.1955				-59.6932	-59.2284		0.847989	0.469806																3.23023	0.467964		0.957473	-0.0215445		1.34645
	-58.1554	-60.129		-56.1814	-57.1841				-59.7122	-59.2188		0.835114	0.511462																3.23423	0.46739		0.956897	-0.0221162		1.34587
	-58.1307	-60.1008		-56.1735	-57.1732				-59.734	-59.2105		0.834101	0.557173																3.23824	0.466817		0.956322	-0.022687		1.34529
	-58.1046	-60.073		-56.1649	-57.163				-59.75	-59.2045		0.844262	0.606364																3.24224	0.466245		0.955748	-0.023257		1.34472
	-58.0783	-60.0457		-56.1556	-57.1534				-59.7534	-59.2026		0.864274	0.658248																3.24625	0.465674		0.955175	-0.0238261		1.34414
	-58.053	-60.0188		-56.1459	-57.1442				-59.7414	-59.2056		0.892262	0.711786																3.25025	0.465104		0.954602	-0.0243943		1.34357
	-58.0298	-59.9921		-56.1358	-57.1355				-59.7158	-59.2117		0.925916	0.765685																3.25425	0.464534		0.954031	-0.0249616		1.343
	-58.0094	-59.9652		-56.1255	-57.1271				-59.6822	-59.2162		0.962634	0.818413																3.25826	0.463966		0.95346	-0.0255281		1.34242
	-57.9924	-59.9381		-56.1153	-57.1189				-59.6471	-59.2139		0.999694	0.868258																3.26226	0.463398		0.95289	-0.0260937		1.34185
	-57.9789	-59.9105		-56.1052	-57.1107				-59.6157	-59.2015		1.03443	0.913412																3.26627	0.462832		0.952321	-0.0266584		1.34128
	-57.9689	-59.8828		-56.0957	-57.1024				-59.5891	-59.1776		1.06438	0.952079																3.27027	0.462266		0.951754	-0.0272223		1.34071
	-57.9622	-59.8554		-56.0867	-57.0939				-59.5636	-59.1424		1.08748	0.982597																3.27427	0.461701		0.951186	-0.0277853		1.34014
	-57.9583	-59.8291		-56.0786	-57.0852				-59.534	-59.0958		1.10216	1.00357																3.27828	0.461136		0.95062	-0.0283474		1.33958
	-57.9569	-59.8049		-56.0717	-57.0762				-59.4969	-59.0391		1.10739	1.01398																3.28228	0.460573		0.950055	-0.0289087		1.33901
	-57.9577	-59.7839		-56.0659	-57.067				-59.4529	-58.9774		1.10281	1.01329																3.28629	0.460011		0.949491	-0.0294691		1.33844
	-57.9606	-59.7669		-56.0615	-57.0576				-59.4061	-58.9204		1.08865	1.00149																3.29029	0.459449		0.948927	-0.0300287		1.33788
	-57.9655	-59.7546		-56.0586	-57.048				-59.3613	-58.8791		1.0657	0.979125																3.29429	0.458889		0.948365	-0.0305874		1.33731
	-57.9725	-59.7472		-56.0571	-57.0384				-59.3221	-58.8596		1.03526	0.947284																3.2983	0.458329		0.947803	-0.0311453		1.33675
	-57.9815	-59.7443		-56.057	-57.029				-59.2902	-58.8586		0.998973	0.907522																3.3023	0.45777		0.947242	-0.0317023		1.33619
	-57.9927	-59.7454		-56.0582	-57.0198				-59.2666	-58.8636		0.958755	0.861755																3.30631	0.457212		0.946682	-0.0322584		1.33563
	-58.0061	-59.7494		-56.0604	-57.011				-59.2526	-58.8595		0.916611	0.812129																3.31031	0.456655		0.946123	-0.0328137		1.33507
	-58.0213	-59.7551		-56.0633	-57.0027				-59.2494	-58.8368		0.874524	0.760865																3.31431	0.456098		0.945565	-0.0333682		1.33451
	-58.038	-59.7612		-56.0668	-56.9952				-59.256	-58.7988		0.834333	0.710097																3.31832	0.455543		0.945007	-0.0339218		1.33395
	-58.0556	-59.7666		-56.0706	-56.9885				-59.2686	-58.7599		0.797641	0.661729																3.32232	0.454988		0.944451	-0.0344746		1.33339
	-58.0735	-59.7704		-56.0742	-56.9827				-59.2808	-58.7383		0.765744	0.617307																3.32633	0.454434		0.943895	-0.0350265		1.33283
	-58.0907	-59.7719		-56.0776	-56.9779				-59.286	-58.7443		0.739599	0.577926																3.33033	0.453882		0.943341	-0.0355775		1.33228
	-58.1064	-59.7706		-56.0805	-56.9741				-59.28	-58.7749		0.719807	0.544194																3.33433	0.45333		0.942787	-0.0361278		1.33172
	-58.1201	-59.7665		-56.0828	-56.9713				-59.2622	-58.8161		0.70663	0.516223																3.33834	0.452778		0.942234	-0.0366772		1.33117
	-58.131	-59.7596		-56.0844	-56.9695				-59.2359	-58.8515		0.70002	0.493684																3.34234	0.452228		0.941682	-0.0372257		1.33061
	-58.139	-59.7499		-56.0853	-56.9686				-59.2062	-58.8697		0.699658	0.475894																3.34635	0.451679		0.941131	-0.0377735		1.33006
	-58.1439	-59.7378		-56.0855	-56.9686				-59.1784	-58.8662		0.705003	0.461929																3.35035	0.45113		0.94058	-0.0383203		1.32951
	-58.1457	-59.7236		-56.085	-56.9692				-59.1568	-58.8423		0.715331	0.450757																3.35435	0.450582		0.940031	-0.0388664		1.32896
	-58.1446	-59.7077		-56.084	-56.9705				-59.1432	-58.8032		0.729779	0.441366																3.35836	0.450035		0.939482	-0.0394116		1.32841
	-58.1411	-59.6904		-56.0826	-56.9723				-59.1373	-58.757		0.747375	0.43288																3.36236	0.449489		0.938935	-0.039956		1.32786
	-58.1352	-59.6724		-56.0808	-56.9744				-59.1368	-58.7125		0.767067	0.424635																3.36637	0.448944		0.938388	-0.0404996		1.32731
	-58.1271	-59.6539		-56.0789	-56.9767				-59.1376	-58.6764		0.787751	0.416226																3.37037	0.4484		0.937842	-0.0410423		1.32676
	-58.1168	-59.6355		-56.0771	-56.9792				-59.1349	-58.6509		0.808295	0.407506																3.37437	0.447856		0.937296	-0.0415842		1.32622
	-58.1044	-59.6176		-56.0753	-56.9816				-59.1252	-58.6345		0.827572	0.398547																3.37838	0.447313		0.936752	-0.0421253		1.32567
	-58.0897	-59.6002		-56.0739	-56.984				-59.1075	-58.6251		0.844494	0.389571																3.38238	0.446772		0.936209	-0.0426656		1.32513
	-58.0728	-59.5837		-56.0729	-56.9861				-59.084	-58.6239		0.858056	0.380856																3.38639	0.446231		0.935666	-0.043205		1.32458
	-58.0539	-59.5678		-56.0724	-56.988				-59.0575	-58.6351		0.867387	0.372652																3.39039	0.44569		0.935124	-0.0437436		1.32404
	-58.0334	-59.5527		-56.0726	-56.9896				-59.0296	-58.6615		0.871799	0.365093																3.39439	0.445151		0.934584	-0.0442814		1.3235
	-58.0121	-59.5383		-56.0735	-56.9909				-59.0007	-58.6989		0.87084	0.358148																3.3984	0.444613		0.934044	-0.0448184		1.32296
	-57.9909	-59.5246		-56.0752	-56.9919				-58.9708	-58.7358		0.864334	0.351601																3.4024	0.444075		0.933504	-0.0453546		1.32242
	-57.9711	-59.5117		-56.0777	-56.9926				-58.9409	-58.7574		0.852411	0.345075																3.40641	0.443538		0.932966	-0.04589		1.32188
	-57.9537	-59.4999		-56.0809	-56.9933				-58.9127	-58.7541		0.835514	0.338084																3.41041	0.443002		0.932429	-0.0464245		1.32134
	-57.9401	-59.4894		-56.0847	-56.9939				-58.8876	-58.726		0.814388	0.330118																3.41441	0.442467		0.931892	-0.0469582		1.3208
	-57.9312	-59.4805		-56.0891	-56.9945				-58.8656	-58.6819		0.790039	0.320749																3.41842	0.441933		0.931356	-0.0474912		1.32026
	-57.9275	-59.4731		-56.0939	-56.9954				-58.8458	-58.6335		0.763675	0.309721																3.42242	0.441399		0.930822	-0.0480233		1.31973
	-57.9293	-59.4671		-56.099	-56.9967				-58.8271	-58.5896		0.736623	0.297038																3.42643	0.440866		0.930287	-0.0485546		1.31919
	-57.9365	-59.4621		-56.1043	-56.9983				-58.8102	-58.5546		0.710237	0.283011																3.43043	0.440335		0.929754	-0.0490851		1.31866
	-57.9483	-59.4577		-56.1095	-57.0003				-58.7975	-58.5302		0.685792	0.268276																3.43443	0.439804		0.929222	-0.0496148		1.31812
	-57.9639	-59.4534		-56.1146	-57.0027				-58.7924	-58.5179		0.664389	0.253758																3.43844	0.439273		0.92869	-0.0501437		1.31759
	-57.9823	-59.4486		-56.1194	-57.0054				-58.7962	-58.5195		0.64687	0.240606																3.44244	0.438744		0.92816	-0.0506718		1.31706
	-58.0023	-59.4429		-56.124	-57.0083				-58.8073	-58.5352		0.633751	0.23008																3.44645	0.438215		0.92763	-0.0511991		1.31653
	-58.0232	-59.4362		-56.1282	-57.0114				-58.8197	-58.5616		0.625179	0.223433																3.45045	0.437688		0.927101	-0.0517256		1.316
	-58.044	-59.4282		-56.132	-57.0144				-58.8259	-58.5915		0.620927	0.221775																3.45445	0.437161		0.926573	-0.0522513		1.31547
	-58.0642	-59.4191		-56.1355	-57.0172				-58.8203	-58.6166		0.620411	0.225946																3.45846	0.436635		0.926046	-0.0527762		1.31494
	-58.0834	-59.4091		-56.1385	-57.0198				-58.8028	-58.631		0.622744	0.236424																3.46246	0.436109		0.925519	-0.0533003		1.31442
	-58.1017	-59.3986		-56.1412	-57.022				-58.7789	-58.6334		0.62681	0.253247																3.46647	0.435585		0.924993	-0.0538236		1.31389
	-58.1188	-59.3881		-56.1434	-57.0238				-58.7564	-58.627		0.631352	0.275995																3.47047	0.435061		0.924469	-0.0543462		1.31336
	-58.1349	-59.3781		-56.1454	-57.0252				-58.7406	-58.6173		0.635082	0.303798																3.47447	0.434538		0.923945	-0.0548679		1.31284
	-58.1501	-59.3692		-56.147	-57.0262				-58.7313	-58.609		0.636772	0.335393																3.47848	0.434016		0.923422	-0.0553889		1.31231
	-58.1644	-59.3621		-56.1485	-57.0269				-58.7228	-58.6036		0.635355	0.369212																3.48248	0.433495		0.922899	-0.0559091		1.31179
	-58.1778	-59.3572		-56.1498	-57.0272				-58.7076	-58.5992		0.629995	0.403493																3.48649	0.432975		0.922378	-0.0564284		1.31127
	-58.1903	-59.3548		-56.151	-57.0273				-58.6806	-58.5919		0.62014	0.436404																3.49049	0.432455		0.921857	-0.056947		1.31075
	-58.2019	-59.355		-56.1523	-57.0271				-58.643	-58.5787		0.605553	0.466168																3.49449	0.431936		0.921337	-0.0574649		1.31023
	-58.2126	-59.3574		-56.1538	-57.0266				-58.6023	-58.5587		0.586306	0.491182																3.4985	0.431418		0.920818	-0.0579819		1.30971
	-58.2223	-59.3614		-56.1556	-57.0257				-58.5687	-58.5339		0.562767	0.510115																3.5025	0.430901		0.9203	-0.0584981		1.30919
	-58.231	-59.3661		-56.1577	-57.0246				-58.5504	-58.5069		0.535548	0.521983																3.50651	0.430385		0.919783	-0.0590136		1.30867
	-58.2388	-59.3705		-56.1603	-57.023				-58.5494	-58.4804		0.505454	0.526198																3.51051	0.429869		0.919266	-0.0595283		1.30815
	-58.2456	-59.3736		-56.1634	-57.0211				-58.5606	-58.4555		0.473411	0.522588																3.51451	0.429354		0.918751	-0.0600423		1.30764
	-58.2516	-59.3745		-56.167	-57.0188				-58.5751	-58.4325		0.440405	0.511384																3.51852	0.42884		0.918236	-0.0605554		1.30712
	-58.2569	-59.3726		-56.171	-57.0162				-58.585	-58.4128		0.407412	0.493193																3.52252	0.428327		0.917722	-0.0610678		1.30661
	-58.2613	-59.3676		-56.1753	-57.0134				-58.5863	-58.3985		0.375345	0.468937																3.52653	0.427815		0.917209	-0.0615794		1.30609
	-58.2649	-59.3599		-56.1799	-57.0104				-58.5802	-58.3918		0.345003	0.439795																3.53053	0.427303		0.916696	-0.0620903		1.30558
	-58.2677	-59.3496		-56.1844	-57.0075				-58.5698	-58.3913		0.317041	0.407119																3.53453	0.426792		0.916185	-0.0626003		1.30507
	-58.2696	-59.3374		-56.1888	-57.0049				-58.557	-58.3926		0.291943	0.372357																3.53854	0.426282		0.915674	-0.0631096		1.30456
	-58.2709	-59.324		-56.1928	-57.0025				-58.5415	-58.3908		0.270011	0.336979																3.54254	0.425773		0.915164	-0.0636182		1.30405
	-58.2717	-59.3099		-56.1964	-57.0007				-58.5236	-58.3838		0.251367	0.302403																3.54655	0.425264		0.914655	-0.0641259		1.30354
	-58.2723	-59.2955		-56.1993	-56.9994				-58.507	-58.3732		0.235955	0.269936																3.55055	0.424757		0.914146	-0.064633		1.30303
	-58.2734	-59.2811		-56.2014	-56.9987				-58.4985	-58.3635		0.223566	0.240725																3.55455	0.42425		0.913639	-0.0651392		1.30252
	-58.2754	-59.2668		-56.2027	-56.9985				-58.5043	-58.3599		0.213855	0.21572																3.55856	0.423744		0.913132	-0.0656447		1.30201
	-58.279	-59.2527		-56.2031	-56.9987				-58.5243	-58.3656		0.206375	0.195653																3.56256	0.423238		0.912626	-0.0661494		1.30151
	-58.2847	-59.2388		-56.2027	-56.9992				-58.5513	-58.3797		0.200613	0.181025																3.56657	0.422734		0.912121	-0.0666534		1.301
	-58.2927	-59.2254		-56.2014	-56.9999				-58.5736	-58.3968		0.196031	0.172104																3.57057	0.42223		0.911617	-0.0671566		1.30049
	-58.3033	-59.2128		-56.1992	-57.0005				-58.5806	-58.4088		0.192102	0.168938																3.57457	0.421727		0.911114	-0.0676591		1.29999
	-58.3162	-59.2015		-56.1964	-57.001				-58.568	-58.4094		0.188356	0.171366																3.57858	0.421225		0.910611	-0.0681608		1.29949
	-58.331	-59.192		-56.193	-57.0012				-58.5393	-58.3981		0.184412	0.179038																3.58258	0.420724		0.910109	-0.0686618		1.29899
	-58.3472	-59.1849		-56.1891	-57.0011				-58.5039	-58.3807		0.180003	0.191446																3.58659	0.420223		0.909608	-0.069162		1.29848
	-58.3642	-59.1805		-56.1848	-57.0007				-58.4722	-58.3653		0.174994	0.207945																3.59059	0.419723		0.909108	-0.0696614		1.29798
	-58.3815	-59.1787		-56.1803	-57				-58.4516	-58.3582		0.169384	0.227789																3.59459	0.419224		0.908608	-0.0701602		1.29748
	-58.3991	-59.1793		-56.1757	-56.9992				-58.4451	-58.36		0.163293	0.250163																3.5986	0.418726		0.90811	-0.0706581		1.29699
	-58.4171	-59.1817		-56.1712	-56.9985				-58.4512	-58.3669		0.156945	0.274214																3.6026	0.418228		0.907612	-0.0711553		1.29649
	-58.436	-59.1849		-56.1668	-56.9979				-58.4651	-58.3739		0.150631	0.299089																3.60661	0.417732		0.907115	-0.0716518		1.29599
	-58.4566	-59.1879		-56.1628	-56.9977				-58.4811	-58.3782		0.144674	0.323964																3.61061	0.417236		0.906619	-0.0721476		1.29549
	-58.4798	-59.1896		-56.1591	-56.998				-58.4939	-58.3798		0.139392	0.348082																3.61461	0.41674		0.906123	-0.0726426		1.295
	-58.5061	-59.189		-56.156	-56.9988				-58.5003	-58.3773		0.135058	0.370779																3.61862	0.416246		0.905629	-0.0731368		1.2945
	-58.5359	-59.1857		-56.1535	-57.0003				-58.5002	-58.3662		0.131881	0.391509																3.62262	0.415752		0.905135	-0.0736303		1.29401
	-58.5687	-59.1794		-56.1517	-57.0023				-58.4955	-58.3413		0.129985	0.409863																3.62663	0.415259		0.904642	-0.0741231		1.29352
	-58.6036	-59.1703		-56.1507	-57.0047				-58.4886	-58.3032		0.129409	0.425582																3.63063	0.414767		0.904149	-0.0746151		1.29302
	-58.6388	-59.159		-56.1504	-57.0076				-58.4818	-58.2615		0.130114	0.43856																3.63463	0.414276		0.903658	-0.0751065		1.29253
	-58.6726	-59.1465		-56.1509	-57.0107				-58.4764	-58.2304		0.131998	0.448844																3.63864	0.413785		0.903167	-0.075597		1.29204
	-58.7028	-59.1338		-56.1523	-57.014				-58.4722	-58.2204		0.134926	0.456621																3.64264	0.413295		0.902677	-0.0760869		1.29155
	-58.7278	-59.1218		-56.1544	-57.0173				-58.4684	-58.2319		0.138754	0.4622																3.64665	0.412806		0.902188	-0.076576		1.29106
	-58.7465	-59.1114		-56.1573	-57.0205				-58.4639	-58.256		0.143349	0.465986																3.65065	0.412318		0.9017	-0.0770644		1.29057
	-58.7586	-59.1031		-56.161	-57.0235				-58.4589	-58.279		0.148614	0.468454																3.65465	0.41183		0.901212	-0.077552		1.29009
	-58.7645	-59.097		-56.1654	-57.0264				-58.4543	-58.2886		0.154496	0.470105																3.65866	0.411343		0.900726	-0.078039		1.2896
	-58.7655	-59.0931		-56.1705	-57.0292				-58.4513	-58.2782		0.160981	0.471431																3.66266	0.410857		0.90024	-0.0785252		1.28911
	-58.763	-59.0907		-56.1763	-57.0318				-58.4499	-58.2481		0.168088	0.472871																3.66667	0.410372		0.899754	-0.0790106		1.28863
	-58.7587	-59.0893		-56.183	-57.0345				-58.4484	-58.2058		0.175853	0.474765																3.67067	0.409887		0.89927	-0.0794954		1.28814
	-58.7542	-59.088		-56.1904	-57.0373				-58.4454	-58.1636		0.184297	0.477314																3.67467	0.409403		0.898786	-0.0799794		1.28766
	-58.7506	-59.0861		-56.1987	-57.0401				-58.4401	-58.1332		0.193407	0.48055																3.67868	0.40892		0.898304	-0.0804628		1.28718
	-58.7484	-59.0829		-56.2079	-57.0431				-58.434	-58.1219		0.203109	0.484306																3.68268	0.408438		0.897821	-0.0809454		1.2867
	-58.748	-59.0781		-56.218	-57.0461				-58.4294	-58.1292		0.213255	0.488215																3.68669	0.407956		0.89734	-0.0814272		1.28622
	-58.749	-59.0713		-56.229	-57.0492				-58.4287	-58.1489		0.223609	0.49172																3.69069	0.407476		0.89686	-0.0819084		1.28574
	-58.7511	-59.0625		-56.2409	-57.0522				-58.4325	-58.1731		0.233855	0.494104																3.69469	0.406996		0.89638	-0.0823888		1.28526
	-58.7537	-59.0519		-56.2535	-57.055				-58.4385	-58.1947		0.243613	0.494547																3.6987	0.406516		0.895901	-0.0828686		1.28478
	-58.7562	-59.0398		-56.2669	-57.0575				-58.4426	-58.2081		0.25246	0.492196																3.7027	0.406038		0.895423	-0.0833476		1.2843
	-58.7581	-59.0268		-56.2808	-57.0595				-58.4409	-58.2076		0.259971	0.486255																3.70671	0.40556		0.894945	-0.0838259		1.28382
	-58.7589	-59.0133		-56.2952	-57.0609				-58.4317	-58.1882		0.265757	0.476071																3.71071	0.405083		0.894469	-0.0843035		1.28335
	-58.7584	-59.0002		-56.3097	-57.0616				-58.4165	-58.1478		0.269502	0.461223																3.71471	0.404606		0.893993	-0.0847804		1.28287
	-58.7565	-58.9881		-56.3242	-57.0614				-58.3984	-58.0905		0.271002	0.441595																3.71872	0.404131		0.893518	-0.0852566		1.2824
	-58.7532	-58.9776		-56.3385	-57.0605				-58.3801	-58.028		0.270191	0.41742																3.72272	0.403656		0.893043	-0.0857321		1.28192
	-58.7489	-58.9694		-56.3526	-57.0588				-58.3635	-57.9754		0.26715	0.389297																3.72673	0.403182		0.89257	-0.0862069		1.28145
	-58.7444	-58.9636		-56.3661	-57.0563				-58.3494	-57.9458		0.262113	0.35817																3.73073	0.402708		0.892097	-0.0866809		1.28098
	-58.7405	-58.9603		-56.3791	-57.0533				-58.3387	-57.9446		0.255444	0.32527																3.73473	0.402235		0.891625	-0.0871543		1.28051
	-58.7383	-58.9592		-56.3914	-57.0497				-58.3323	-57.9669		0.247607	0.292026																3.73874	0.401763		0.891154	-0.087627		1.28003
	-58.7388	-58.9597		-56.4032	-57.0457				-58.3306	-58.0006		0.239123	0.259948																3.74274	0.401292		0.890683	-0.0880989		1.27956
	-58.7427	-58.9612		-56.4143	-57.0415				-58.3327	-58.0318		0.230521	0.230506																3.74675	0.400822		0.890214	-0.0885702		1.2791
	-58.7507	-58.9629		-56.425	-57.0372				-58.3371	-58.0505		0.222283	0.204998																3.75075	0.400352		0.889745	-0.0890408		1.27863
	-58.7627	-58.9639		-56.4351	-57.033				-58.3419	-58.0534		0.214798	0.184436																3.75475	0.399883		0.889276	-0.0895107		1.27816
	-58.7783	-58.9637		-56.4448	-57.029				-58.3454	-58.0438		0.208321	0.169462																3.75876	0.399415		0.888809	-0.0899799		1.27769
	-58.7968	-58.9618		-56.4543	-57.0253				-58.3468	-58.0299		0.202947	0.16029																3.76276	0.398947		0.888342	-0.0904484		1.27723
	-58.8172	-58.9578		-56.4634	-57.0223				-58.3459	-58.0213		0.198602	0.156692																3.76677	0.39848		0.887876	-0.0909162		1.27676
	-58.8385	-58.9519		-56.4723	-57.0201				-58.3431	-58.0257		0.195053	0.158025																3.77077	0.398014		0.887411	-0.0913833		1.2763
	-58.8597	-58.9441		-56.4809	-57.0188				-58.3393	-58.0437		0.191933	0.163295																3.77477	0.397549		0.886947	-0.0918497		1.27583
	-58.8803	-58.9351		-56.4893	-57.0187				-58.3351	-58.0679		0.188786	0.17125																3.77878	0.397084		0.886483	-0.0923154		1.27537
	-58.8999	-58.9255		-56.4975	-57.02				-58.3307	-58.0859		0.185115	0.180496																3.78278	0.39662		0.88602	-0.0927805		1.27491
	-58.9185	-58.9159		-56.5054	-57.0227				-58.3256	-58.0872		0.180446	0.18962																3.78679	0.396157		0.885558	-0.0932448		1.27445
	-58.9363	-58.9073		-56.513	-57.027				-58.3195	-58.0684		0.174385	0.197306																3.79079	0.395694		0.885097	-0.0937085		1.27399
	-58.9536	-58.9001		-56.5203	-57.0329				-58.3121	-58.0346		0.166668	0.202443																3.79479	0.395232		0.884636	-0.0941715		1.27353
	-58.9706	-58.8947		-56.5272	-57.0403				-58.3035	-57.995		0.157204	0.204198																3.7988	0.394771		0.884176	-0.0946338		1.27307
	-58.987	-58.8911		-56.5338	-57.0489				-58.2937	-57.9587		0.146096	0.202068																3.8028	0.394311		0.883717	-0.0950954		1.27261
	-59.0026	-58.8891		-56.5402	-57.0587				-58.2833	-57.9326		0.133646	0.195892																3.80681	0.393851		0.883258	-0.0955564		1.27215
	-59.0167	-58.8879		-56.5462	-57.0693				-58.2728	-57.9195		0.120343	0.185837																3.81081	0.393392		0.882801	-0.0960166		1.2717
	-59.0284	-58.8869		-56.552	-57.0804				-58.2626	-57.9183		0.106823	0.172349																3.81481	0.392934		0.882344	-0.0964762		1.27124
	-59.0369	-58.8854		-56.5576	-57.0916				-58.2538	-57.9256		0.0938277	0.156096																3.81882	0.392476		0.881888	-0.0969351		1.27078
	-59.0419	-58.8831		-56.563	-57.1027				-58.2482	-57.9384		0.0821488	0.13789																3.82282	0.392019		0.881432	-0.0973934		1.27033
	-59.0432	-58.8798		-56.5683	-57.1133				-58.2483	-57.9548		0.0725732	0.118621																3.82683	0.391563		0.880978	-0.0978509		1.26988
	-59.0414	-58.8759		-56.5734	-57.1232				-58.2557	-57.9726		0.0658399	0.0991949																3.83083	0.391108		0.880524	-0.0983078		1.26942
	-59.0374	-58.8722		-56.5784	-57.1324				-58.2701	-57.9875		0.0626157	0.080502																3.83483	0.390653		0.88007	-0.098764		1.26897
	-59.0325	-58.8698		-56.5833	-57.1407				-58.2891	-57.9942		0.0634991	0.0634087																3.83884	0.390199		0.879618	-0.0992196		1.26852
	-59.028	-58.8698		-56.5881	-57.1481				-58.3085	-57.9892		0.0690625	0.0487938																3.84284	0.389746		0.879166	-0.0996745		1.26807
	-59.0252	-58.8734		-56.5928	-57.1548				-58.3244	-57.9748		0.0799375	0.0376241																3.84685	0.389293		0.878715	-0.100129		1.26762
	-59.0249	-58.8814		-56.5973	-57.1608				-58.3334	-57.9582		0.0969496	0.0310769																3.85085	0.388841		0.878265	-0.100582		1.26717
	-59.0274	-58.8939		-56.6016	-57.1662				-58.3334	-57.9473		0.121301	0.0307053																3.85485	0.38839		0.877815	-0.101035		1.26672
	-59.0326	-58.9108		-56.6057	-57.1712				-58.3237	-57.9457		0.154797	0.0386429																3.85886	0.38794		0.877367	-0.101487		1.26628
	-59.0403	-58.9312		-56.6095	-57.1757				-58.3049	-57.9513		0.200107	0.0578353																3.86286	0.38749		0.876919	-0.101939		1.26583
	-59.0499	-58.9538		-56.6129	-57.1796				-58.28	-57.9585		0.261038	0.0922803																3.86687	0.387041		0.876471	-0.10239		1.26538
	-59.0608	-58.9771		-56.6157	-57.1828				-58.255	-57.9632		0.34279	0.147248																3.87087	0.386592		0.876025	-0.10284		1.26494
	-59.0728	-58.9992		-56.6177	-57.1848				-58.2379	-57.9655		0.452153	0.229441																3.87487	0.386145		0.875579	-0.10329		1.26449
	-59.0859	-59.0185		-56.6183	-57.1851				-58.235	-57.9682		0.597594	0.347045																3.87888	0.385698		0.875134	-0.103739		1.26405
	-59.1002	-59.0338		-56.6169	-57.1827				-58.2468	-57.9737		0.789168	0.509612																3.88288	0.385251		0.874689	-0.104187		1.26361
	-59.1159	-59.0442		-56.6124	-57.1764				-58.2669	-57.9812		1.03819	0.727703																3.88689	0.384806		0.874246	-0.104634		1.26317
	-59.1334	-59.0494		-56.6036	-57.1648				-58.2843	-57.9865		1.35661	1.01224																3.89089	0.384361		0.873803	-0.105081		1.26272
	-59.1525	-59.0499		-56.5885	-57.1458				-58.2892	-57.9854		1.756	1.37354																3.89489	0.383916		0.87336	-0.105528		1.26228
	-59.1725	-59.0462		-56.5648	-57.1172				-58.2776	-57.9769		2.24623	1.81991																3.8989	0.383473		0.872919	-0.105973		1.26184
	-59.1921	-59.0393		-56.5296	-57.0763				-58.2532	-57.9646		2.8337	2.35607																3.9029	0.38303		0.872478	-0.106418		1.2614
	-59.2091	-59.0298		-56.4795	-57.0202				-58.2243	-57.9544		3.51937	2.98111																3.90691	0.382588		0.872038	-0.106863		1.26097
	-59.2198	-59.0177		-56.4108	-56.946				-58.1996	-57.9518		4.29663	3.68657																3.91091	0.382146		0.871599	-0.107306		1.26053
	-59.219	-59.002		-56.32	-56.8509				-58.1847	-57.9584		5.14916	4.45446																3.91491	0.381705		0.87116	-0.107749		1.26009
	-59.1989	-58.98		-56.2036	-56.7329				-58.1815	-57.9717		6.04927	5.25575																3.91892	0.381265		0.870722	-0.108192		1.25966
	-59.1488	-58.9473		-56.0597	-56.5912				-58.1889	-57.9872		6.95679	6.04952																3.92292	0.380826		0.870285	-0.108633		1.25922
	-59.0541	-58.8967		-55.8877	-56.4267				-58.2041	-58.0009		7.81893	6.78318																3.92693	0.380387		0.869849	-0.109075		1.25879
	-58.8963	-58.819		-55.69	-56.2431				-58.2231	-58.012		8.57145	7.39383																3.93093	0.379949		0.869413	-0.109515		1.25835
	-58.6533	-58.7028		-55.472	-56.0471				-58.2417	-58.0225		9.14129	7.81125																3.93493	0.379512		0.868978	-0.109955		1.25792
	-58.3015	-58.5354		-55.2437	-55.8495				-58.2556	-58.0353		9.45073	7.96226																3.93894	0.379075		0.868544	-0.110394		1.25749
	-57.8192	-58.3045		-55.0195	-55.6651				-58.2597	-58.0492		9.42303	7.77651																3.94294	0.378639		0.86811	-0.110833		1.25706
	-57.192	-58.001		-54.8187	-55.5129				-58.242	-58.0511		8.9892	7.1933																3.94695	0.378203		0.867677	-0.111271		1.25662
	-56.4192	-57.6221		-54.665	-55.4154				-58.1621	-57.9972		8.09551	6.16892																3.95095	0.377769		0.867245	-0.111708		1.25619
	-55.5211	-57.1749		-54.5851	-55.3976				-57.9162	-57.7837		6.71097	4.68373																3.95495	0.377335		0.866814	-0.112144		1.25576
	-54.545	-56.6797		-54.6073	-55.4849				-57.3167	-57.2281		4.83397	2.74832																3.95896	0.376901		0.866383	-0.11258		1.25534
	-53.5673	-56.1723		-54.7591	-55.7011				-56.146	-56.1157		2.49733	0.407669																3.96296	0.376469		0.865953	-0.113016		1.25491
	-52.6921	-55.7031		-55.0639	-56.0656				-54.3111	-54.3417		-0.229106	-2.25713																3.96697	0.376036		0.865524	-0.113451		1.25448
	-52.0431	-55.334		-55.5385	-56.5905				-52.0186	-52.0855		-3.23899	-5.1305																3.97097	0.375605		0.865095	-0.113885		1.25405
	-51.7506	-55.1323		-56.1895	-57.2778				-49.8019	-49.8659		-6.3934	-8.06738																3.97497	0.375174		0.864667	-0.114318		1.25363
	-51.933	-55.1609		-57.0114	-58.1176				-48.3089	-48.3672		-9.52827	-10.9016																3.97898	0.374744		0.86424	-0.114751		1.2532
	-52.6777	-55.4687		-57.9841	-59.0865				-47.9689	-48.1077		-12.4649	-13.4574																3.98298	0.374315		0.863813	-0.115183		1.25278
	-54.0228	-56.0801		-59.0735	-60.1478				-48.7946	-49.1829		-15.023	-15.5625																3.98699	0.373886		0.863388	-0.115615		1.25236
	-55.9438	-56.9877		-60.2314	-61.2524				-50.4677	-51.2713		-17.0346	-17.0626																3.99099	0.373458		0.862962	-0.116046		1.25193
	-58.3481	-58.1487		-61.399	-62.3423				-52.6238	-53.895		-18.3585	-17.8351																3.99499	0.373031		0.862538	-0.116476		1.25151
	-61.0783	-59.4864		-62.5101	-63.3536				-55.101	-56.7263		-18.8929	-17.8009																3.999	0.372604		0.862114	-0.116906		1.25109
	-63.9262	-60.8974		-63.4963	-64.222				-57.9585	-59.7027		-18.5855	-16.9331																4.003	0.372178		0.861691	-0.117335		1.25067
	-66.6533	-62.2626		-64.2927	-64.8882				-61.2529	-62.8641		-17.4391	-15.2613																4.00701	0.371753		0.861269	-0.117763		1.25025
	-69.0187	-63.4613		-64.8437	-65.3029				-64.7547	-66.0574		-15.5134	-12.8712																4.01101	0.371328		0.860848	-0.118191		1.24983
	-70.8072	-64.3863		-65.108	-65.4318				-67.8669	-68.7894		-12.9215	-9.89891																4.01502	0.370904		0.860427	-0.118618		1.24941
	-71.8564	-64.9574		-65.0625	-65.2588				-69.861	-70.3939		-9.82129	-6.52118																4.01902	0.370481		0.860006	-0.119045		1.24899
	-72.0767	-65.1308		-64.7053	-64.7879				-70.2733	-70.4065		-6.40332	-2.94142																4.02302	0.370058		0.859587	-0.119471		1.24858
	-71.4626	-64.9044		-64.0554	-64.0436				-69.151	-68.8494		-2.8759	0.626207																4.02703	0.369636		0.859168	-0.119896		1.24816
	-70.0925	-64.3167		-63.1518	-63.0684				-66.9743	-66.2124		0.551392	3.97364																4.03103	0.369215		0.85875	-0.120321		1.24775
	-68.1173	-63.4401		-62.0501	-61.9196				-64.347	-63.1666		3.68386	6.9149																4.03504	0.368794		0.858333	-0.120745		1.24733
	-65.7403	-62.3715		-60.8174	-60.6645				-61.7042	-60.2394		6.35604	9.29966																4.03904	0.368374		0.857916	-0.121169		1.24692
	-63.1907	-61.2182		-59.5267	-59.3745				-59.221	-57.6657		8.44306	11.0233																4.04304	0.367954		0.8575	-0.121592		1.2465
	-60.695	-60.0854		-58.2509	-58.1195				-56.9345	-55.4749		9.86788	12.0325																4.04705	0.367535		0.857085	-0.122014		1.24609
	-58.4522	-59.064		-57.057	-56.9625				-54.9342	-53.6908		10.6041	12.326																4.05105	0.367117		0.85667	-0.122436		1.24568
	-56.6132	-58.222		-56.001	-55.9549				-53.4454	-52.4547		10.6743	11.9513																4.05506	0.3667		0.856256	-0.122857		1.24527
	-55.2696	-57.5999		-55.1249	-55.1341				-52.7284	-51.9672		10.1441	10.9966																4.05906	0.366283		0.855843	-0.123277		1.24486
	-54.4513	-57.2095		-54.4544	-54.5211				-52.8898	-52.3175		9.11339	9.5808																4.06306	0.365866		0.85543	-0.123697		1.24445
	-54.1316	-57.0376		-53.9984	-54.1213				-53.7793	-53.3646		7.70533	7.84124																4.06707	0.365451		0.855018	-0.124116		1.24404
	-54.2397	-57.0516		-53.7511	-53.9256				-55.054	-54.7752		6.05425	5.92124																4.07107	0.365036		0.854607	-0.124535		1.24363
	-54.6764	-57.2069		-53.6933	-53.913				-56.3463	-56.1741		4.29423	3.95844																4.07508	0.364622		0.854196	-0.124953		1.24322
	-55.331	-57.4542		-53.7969	-54.054				-57.4048	-57.2922		2.54886	2.07503																4.07908	0.364208		0.853787	-0.125371		1.24282
	-56.0961	-57.7469		-54.0273	-54.314				-58.137	-58.0277		0.92324	0.370433																4.08308	0.363795		0.853377	-0.125787		1.24241
	-56.8797	-58.0454		-54.3482	-54.6568				-58.5707	-58.4181		-0.501458	-1.08308																4.08709	0.363383		0.852969	-0.126204		1.24201
	-57.6119	-58.3207		-54.7241	-55.0479				-58.7879	-58.5689		-1.67058	-2.24182																4.09109	0.362971		0.852561	-0.126619		1.2416
	-58.2475	-58.5547		-55.1228	-55.4562				-58.8729	-58.5877		-2.55598	-3.08955																4.0951	0.36256		0.852154	-0.127034		1.2412
	-58.7644	-58.7396		-55.5176	-55.8563				-58.8879	-58.5489		-3.15381	-3.6341																4.0991	0.362149		0.851747	-0.127449		1.24079
	-59.1595	-58.8757		-55.888	-56.2289				-58.8701	-58.4899		-3.48056	-3.9026																4.1031	0.361739		0.851342	-0.127863		1.24039
	-59.4426	-58.9685		-56.22	-56.5609				-58.8385	-58.4249		-3.56817	-3.93585																4.10711	0.36133		0.850937	-0.128276		1.23999
	-59.6314	-59.0265		-56.5054	-56.845				-58.8025	-58.3607		-3.45866	-3.78254																4.11111	0.360922		0.850532	-0.128689		1.23959
	-59.7466	-59.0589		-56.7412	-57.079				-58.7663	-58.3041		-3.19896	-3.49395																4.11512	0.360514		0.850128	-0.129101		1.23919
	-59.8079	-59.0739		-56.9285	-57.2645				-58.7311	-58.2615		-2.83637	-3.11939																4.11912	0.360107		0.849725	-0.129512		1.23879
	-59.8328	-59.0785		-57.0713	-57.4057				-58.6971	-58.2345		-2.41492	-2.70285																4.12312	0.3597		0.849323	-0.129923		1.23839
	-59.8352	-59.0775		-57.1754	-57.5086				-58.6658	-58.2195		-1.97271	-2.28073																4.12713	0.359294		0.848921	-0.130333		1.23799
	-59.8251	-59.0743		-57.2473	-57.58				-58.6394	-58.2101		-1.54045	-1.88072																4.13113	0.358888		0.84852	-0.130743		1.23759
	-59.8097	-59.0708		-57.2938	-57.6266				-58.6184	-58.2014		-1.14083	-1.52175																4.13514	0.358484		0.84812	-0.131152		1.2372
	-59.7933	-59.0679		-57.321	-57.6547				-58.6001	-58.1909		-0.788755	-1.2146																4.13914	0.35808		0.84772	-0.131561		1.2368
	-59.7783	-59.0661		-57.3345	-57.6698				-58.5786	-58.1785		-0.492182	-0.963123																4.14314	0.357676		0.847321	-0.131969		1.2364
	-59.7653	-59.0654		-57.3389	-57.6763				-58.5497	-58.1662		-0.25326	-0.76572																4.14715	0.357273		0.846922	-0.132376		1.23601
	-59.7543	-59.0656		-57.3376	-57.6778				-58.5146	-58.1585		-0.0696964	-0.616944																4.15115	0.356871		0.846525	-0.132783		1.23561
	-59.7443	-59.0664		-57.3335	-57.6769				-58.4812	-58.1624		0.0638833	-0.50898																4.15516	0.356469		0.846128	-0.133189		1.23522
	-59.7345	-59.0676		-57.3285	-57.6754				-58.4593	-58.1836		0.154697	-0.432961																4.15916	0.356068		0.845731	-0.133595		1.23483
	-59.7239	-59.069		-57.3239	-57.6743				-58.4549	-58.2219		0.210748	-0.380013																4.16316	0.355668		0.845336	-0.134		1.23444
	-59.712	-59.0704		-57.3206	-57.6742				-58.4666	-58.2692		0.240004	-0.342024																4.16717	0.355268		0.84494	-0.134404		1.23405
	-59.6989	-59.0717		-57.3189	-57.6752				-58.4872	-58.3133		0.249806	-0.312134																4.17117	0.354869		0.844546	-0.134808		1.23365
	-59.6849	-59.0729		-57.3192	-57.6772				-58.5084	-58.3434		0.246494	-0.284989																4.17518	0.35447		0.844152	-0.135212		1.23326
	-59.6709	-59.074		-57.3215	-57.68				-58.5251	-58.3558		0.235225	-0.256798																4.17918	0.354072		0.843759	-0.135614		1.23288
	-59.6575	-59.0751		-57.3255	-57.6831				-58.5357	-58.3542		0.21994	-0.225236																4.18318	0.353675		0.843367	-0.136017		1.23249
	-59.6456	-59.0764		-57.3312	-57.6862				-58.5395	-58.3471		0.20343	-0.189261																4.18719	0.353278		0.842975	-0.136418		1.2321
	-59.6353	-59.0778		-57.3383	-57.6891				-58.5358	-58.3432		0.18749	-0.148866																4.19119	0.352882		0.842584	-0.136819		1.23171
	-59.6267	-59.0793		-57.3466	-57.6914				-58.5245	-58.3474		0.173101	-0.104814																4.1952	0.352487		0.842193	-0.13722		1.23133
	-59.6192	-59.0808		-57.3559	-57.6931				-58.5085	-58.3589		0.160635	-0.0583793																4.1992	0.352092		0.841804	-0.13762		1.23094
	-59.6118	-59.0822		-57.3658	-57.6942				-58.4927	-58.3713		0.150047	-0.0111189																4.2032	0.351698		0.841414	-0.138019		1.23055
	-59.6035	-59.0832		-57.3761	-57.6947				-58.4817	-58.3759		0.141059	0.0353229																4.20721	0.351304		0.841026	-0.138418		1.23017
	-59.5935	-59.0835		-57.3867	-57.6948				-58.4773	-58.3667		0.1333	0.0793611																4.21121	0.350911		0.840638	-0.138816		1.22979
	-59.5809	-59.0827		-57.3971	-57.6945				-58.4775	-58.3436		0.126423	0.119575																4.21522	0.350519		0.840251	-0.139213		1.2294
	-59.5656	-59.0807		-57.4073	-57.6942				-58.4783	-58.3122		0.120177	0.154768																4.21922	0.350127		0.839864	-0.13961		1.22902
	-59.548	-59.0771		-57.4169	-57.6941				-58.4759	-58.2807		0.114449	0.184001																4.22322	0.349736		0.839478	-0.140007		1.22864
	-59.5288	-59.0719		-57.4258	-57.6944				-58.4696	-58.2568		0.109272	0.206593																4.22723	0.349345		0.839093	-0.140403		1.22826
	-59.5091	-59.065		-57.4336	-57.6952				-58.4617	-58.2459		0.104803	0.222105																4.23123	0.348955		0.838709	-0.140798		1.22788
	-59.4905	-59.0566		-57.4402	-57.6967				-58.4561	-58.2496		0.10129	0.230326																4.23524	0.348566		0.838325	-0.141193		1.2275
	-59.4743	-59.0471		-57.4454	-57.6988				-58.4552	-58.2654		0.0990223	0.231251																4.23924	0.348177		0.837941	-0.141587		1.22712
	-59.4618	-59.0368		-57.4489	-57.7018				-58.4586	-58.2867		0.0982744	0.225065																4.24324	0.347789		0.837559	-0.141981		1.22674
	-59.4541	-59.0262		-57.4508	-57.7053				-58.4641	-58.3043		0.0992619	0.212135																4.24725	0.347401		0.837177	-0.142374		1.22636
	-59.4517	-59.016		-57.4509	-57.7095				-58.4694	-58.3093		0.102101	0.193014																4.25125	0.347014		0.836795	-0.142766		1.22599
	-59.455	-59.0068		-57.4493	-57.714				-58.4732	-58.2964		0.106787	0.168439																4.25526	0.346628		0.836414	-0.143158		1.22561
	-59.4638	-58.9991		-57.446	-57.7189				-58.4755	-58.2668		0.113185	0.139336																4.25926	0.346242		0.836034	-0.14355		1.22523
	-59.4774	-58.9935		-57.4412	-57.7238				-58.4778	-58.2283		0.121044	0.106812																4.26326	0.345857		0.835655	-0.143941		1.22486
	-59.495	-58.9903		-57.4351	-57.7286				-58.4808	-58.1923		0.130017	0.0721391																4.26727	0.345473		0.835276	-0.144331		1.22449
	-59.5154	-58.9897		-57.4281	-57.7331				-58.484	-58.1677		0.139703	0.036722																4.27127	0.345089		0.834898	-0.144721		1.22411
	-59.5375	-58.9919		-57.4204	-57.7372				-58.4853	-58.1582		0.149684	0.00204913																4.27528	0.344705		0.83452	-0.14511		1.22374
	-59.56	-58.9966		-57.4125	-57.7408				-58.4827	-58.1628		0.15956	-0.030369																4.27928	0.344322		0.834144	-0.145499		1.22337
	-59.5818	-59.0037		-57.4046	-57.7437				-58.4753	-58.178		0.168989	-0.0590709																4.28328	0.34394		0.833767	-0.145887		1.22299
	-59.6018	-59.0125		-57.3973	-57.746				-58.4623	-58.2009		0.177695	-0.0827168																4.28729	0.343559		0.833392	-0.146274		1.22262
	-59.6193	-59.0225		-57.3906	-57.7477				-58.4435	-58.2296		0.185477	-0.100157																4.29129	0.343178		0.833017	-0.146661		1.22225
	-59.6337	-59.0332		-57.385	-57.7486				-58.4199	-58.2625		0.192197	-0.110487																4.2953	0.342797		0.832642	-0.147048		1.22188
	-59.6443	-59.0438		-57.3804	-57.7488				-58.3959	-58.2966		0.197747	-0.113085																4.2993	0.342417		0.832269	-0.147434		1.22152
	-59.6512	-59.0539		-57.3771	-57.7484				-58.3787	-58.3264		0.202025	-0.107626																4.3033	0.342038		0.831895	-0.147819		1.22115
	-59.6542	-59.0627		-57.3749	-57.7475				-58.3747	-58.3445		0.204891	-0.09408																4.30731	0.341659		0.831523	-0.148204		1.22078
	-59.6536	-59.0699		-57.3738	-57.746				-58.3856	-58.3457		0.206144	-0.0726897																4.31131	0.341281		0.831151	-0.148588		1.22041
	-59.6503	-59.0751		-57.3736	-57.744				-58.4076	-58.3302		0.205508	-0.043933																4.31532	0.340904		0.83078	-0.148972		1.22005
	-59.6451	-59.0781		-57.3741	-57.7417				-58.4334	-58.3048		0.202637	-0.00848506																4.31932	0.340527		0.830409	-0.149355		1.21968
	-59.6391	-59.0787		-57.375	-57.739				-58.4553	-58.2796		0.197144	0.0328211																4.32332	0.340151		0.830039	-0.149738		1.21932
	-59.6335	-59.0771		-57.3761	-57.736				-58.4669	-58.2636		0.188648	0.0790275																4.32733	0.339775		0.82967	-0.15012		1.21895
	-59.6292	-59.0736		-57.3771	-57.7328				-58.4642	-58.2603		0.176849	0.129074																4.33133	0.3394		0.829301	-0.150502		1.21859
	-59.627	-59.0687		-57.3779	-57.7294				-58.4462	-58.2674		0.161595	0.181812																4.33534	0.339025		0.828933	-0.150883		1.21823
	-59.6269	-59.0633		-57.3783	-57.7259				-58.4154	-58.2787		0.142966	0.23601																4.33934	0.338651		0.828566	-0.151263		1.21786
	-59.6287	-59.0582		-57.3781	-57.7222				-58.3776	-58.2883		0.121336	0.29036																4.34334	0.338278		0.828199	-0.151643		1.2175
	-59.6317	-59.0544		-57.3773	-57.7185				-58.3402	-58.2935		0.0974113	0.343484																4.34735	0.337905		0.827833	-0.152023		1.21714
	-59.6351	-59.0527		-57.3757	-57.7146				-58.3099	-58.2956		0.0722472	0.393955																4.35135	0.337533		0.827467	-0.152402		1.21678
	-59.6377	-59.0538		-57.3735	-57.7105				-58.2907	-58.2967		0.0472191	0.440329																4.35536	0.337161		0.827102	-0.15278		1.21642
	-59.6391	-59.0582		-57.3706	-57.7064				-58.2849	-58.2968		0.0239636	0.481198																4.35936	0.33679		0.826738	-0.153158		1.21606
	-59.6385	-59.0658		-57.367	-57.702				-58.2932	-58.2921		0.00428348	0.515255																4.36336	0.33642		0.826374	-0.153535		1.2157
	-59.636	-59.0765		-57.3627	-57.6975				-58.3154	-58.2769		-0.00997092	0.541375																4.36737	0.33605		0.826011	-0.153912		1.21535
	-59.6317	-59.0901		-57.3576	-57.6927				-58.3487	-58.2479		-0.0170361	0.558695																4.37137	0.33568		0.825649	-0.154288		1.21499
	-59.6259	-59.1063		-57.3518	-57.6876				-58.3868	-58.2061		-0.0153709	0.566697																4.37538	0.335311		0.825287	-0.154664		1.21463
	-59.6192	-59.1248		-57.3452	-57.6821				-58.421	-58.157		-0.00378204	0.565265																4.37938	0.334943		0.824926	-0.155039		1.21428
	-59.612	-59.1452		-57.3375	-57.6763				-58.4436	-58.1087		0.0184738	0.554733																4.38338	0.334576		0.824565	-0.155414		1.21392
	-59.6047	-59.1676		-57.3286	-57.6701				-58.4513	-58.0689		0.0516195	0.53589																4.38739	0.334209		0.824205	-0.155788		1.21357
	-59.5973	-59.1916		-57.3183	-57.6635				-58.4465	-58.0435		0.095326	0.509956																4.39139	0.333842		0.823845	-0.156161		1.21321
	-59.59	-59.2169		-57.3065	-57.6564				-58.4353	-58.0348		0.148722	0.478528																4.3954	0.333476		0.823487	-0.156535		1.21286
	-59.5825	-59.2431		-57.293	-57.6489				-58.4253	-58.0399		0.210443	0.443486																4.3994	0.333111		0.823128	-0.156907		1.21251
	-59.5747	-59.2694		-57.2776	-57.6409				-58.423	-58.0522		0.278719	0.406883																4.4034	0.332746		0.822771	-0.157279		1.21216
	-59.5662	-59.2948		-57.2603	-57.6325				-58.4304	-58.064		0.351488	0.370821																4.40741	0.332382		0.822414	-0.157651		1.2118
	-59.5569	-59.3183		-57.2411	-57.6238				-58.4435	-58.0694		0.426531	0.337316																4.41141	0.332018		0.822058	-0.158022		1.21145
	-59.5466	-59.3388		-57.2199	-57.6146				-58.4527	-58.0675		0.501616	0.308176																4.41542	0.331655		0.821702	-0.158392		1.2111
	-59.5354	-59.3551		-57.197	-57.605				-58.4477	-58.0612		0.574637	0.284898																4.41942	0.331292		0.821347	-0.158762		1.21075
	-59.5233	-59.3667		-57.1725	-57.595				-58.4234	-58.056		0.643744	0.268587																4.42342	0.33093		0.820992	-0.159132		1.21041
	-59.5105	-59.3732		-57.1466	-57.5846				-58.3826	-58.0574		0.707452	0.259905																4.42743	0.330569		0.820638	-0.1595		1.21006
	-59.4975	-59.3745		-57.1196	-57.5736				-58.3343	-58.0677		0.764715	0.259053																4.43143	0.330208		0.820285	-0.159869		1.20971
	-59.4845	-59.3712		-57.0916	-57.5622				-58.2876	-58.085		0.814972	0.265794																4.43544	0.329848		0.819932	-0.160237		1.20936
	-59.4718	-59.3638		-57.063	-57.5502				-58.2489	-58.1024		0.858152	0.279494																4.43944	0.329488		0.81958	-0.160604		1.20902
	-59.4596	-59.3534		-57.0339	-57.5375				-58.2192	-58.1118		0.894648	0.299196																4.44344	0.329129		0.819228	-0.160971		1.20867
	-59.4482	-59.3407		-57.0046	-57.5241				-58.1962	-58.1078		0.925257	0.323714																4.44745	0.32877		0.818878	-0.161337		1.20833
	-59.4377	-59.3267		-56.9751	-57.51				-58.1769	-58.0909		0.951091	0.351729																4.45145	0.328412		0.818527	-0.161703		1.20798
	-59.4284	-59.3121		-56.9455	-57.4949				-58.16	-58.067		0.973474	0.381903																4.45546	0.328055		0.818178	-0.162069		1.20764
	-59.4206	-59.2975		-56.9158	-57.4789				-58.1466	-58.044		0.993829	0.412979																4.45946	0.327698		0.817828	-0.162433		1.2073
	-59.4146	-59.2833		-56.8861	-57.4619				-58.1386	-58.0273		1.01356	0.443877																4.46346	0.327341		0.81748	-0.162798		1.20696
	-59.411	-59.2697		-56.8561	-57.4437				-58.1362	-58.0167		1.03397	0.473771																4.46747	0.326985		0.817132	-0.163161		1.20661
	-59.4102	-59.2569		-56.8259	-57.4244				-58.1357	-58.0078		1.05611	0.502151																4.47147	0.32663		0.816785	-0.163525		1.20627
	-59.4125	-59.2449		-56.7953	-57.4038				-58.1313	-57.9954		1.08081	0.528856																4.47548	0.326275		0.816438	-0.163888		1.20593
	-59.4179	-59.2336		-56.7643	-57.382				-58.1176	-57.9773		1.10856	0.554089																4.47948	0.325921		0.816092	-0.16425		1.20559
	-59.4259	-59.2228		-56.7327	-57.3589				-58.0928	-57.9561		1.13952	0.5784																4.48348	0.325567		0.815746	-0.164612		1.20525
	-59.4358	-59.2122		-56.7006	-57.3345				-58.0597	-57.9374		1.17356	0.602638																4.48749	0.325214		0.815401	-0.164973		1.20491
	-59.4461	-59.2015		-56.6678	-57.3089				-58.0242	-57.9259		1.21024	0.627895																4.49149	0.324862		0.815057	-0.165334		1.20458
	-59.4552	-59.1904		-56.6345	-57.2822				-57.9921	-57.9214		1.24895	0.655405																4.4955	0.32451		0.814713	-0.165694		1.20424
	-59.4614	-59.1785		-56.6005	-57.2543				-57.9665	-57.9193		1.2889	0.686452																4.4995	0.324158		0.81437	-0.166054		1.2039
	-59.4629	-59.1658		-56.566	-57.2255				-57.9466	-57.9122		1.32926	0.722247																4.5035	0.323807		0.814027	-0.166413		1.20357
	-59.4585	-59.152		-56.531	-57.1958				-57.9296	-57.8951		1.36919	0.763816																4.50751	0.323457		0.813685	-0.166772		1.20323
	-59.4471	-59.1373		-56.4955	-57.1652				-57.9115	-57.8686		1.40798	0.811895																4.51151	0.323107		0.813344	-0.16713		1.2029
	-59.4286	-59.1218		-56.4594	-57.1339				-57.889	-57.8404		1.44504	0.866845																4.51552	0.322758		0.813003	-0.167488		1.20256
	-59.4033	-59.1056		-56.4228	-57.102				-57.8592	-57.8221		1.48003	0.928587																4.51952	0.322409		0.812663	-0.167845		1.20223
	-59.3717	-59.0887		-56.3855	-57.0693				-57.8209	-57.8231		1.5128	0.996581																4.52352	0.322061		0.812323	-0.168202		1.2019
	-59.3351	-59.0708		-56.3474	-57.036				-57.7747	-57.8436		1.54348	1.06984																4.52753	0.321713		0.811984	-0.168558		1.20156
	-59.2943	-59.0516		-56.3083	-57.002				-57.7232	-57.873		1.57241	1.14701																4.53153	0.321366		0.811646	-0.168914		1.20123
	-59.2506	-59.0305		-56.2681	-56.9673				-57.6703	-57.8937		1.60009	1.22641																4.53554	0.321019		0.811308	-0.169269		1.2009
	-59.2047	-59.0069		-56.2266	-56.9318				-57.6207	-57.8901		1.62716	1.30622																4.53954	0.320673		0.81097	-0.169624		1.20057
	-59.1574	-58.9801		-56.1834	-56.8955				-57.5789	-57.8545		1.65428	1.38459																4.54354	0.320328		0.810634	-0.169978		1.20024
	-59.109	-58.9497		-56.1386	-56.8583				-57.548	-57.7904		1.68209	1.45982																4.54755	0.319983		0.810297	-0.170332		1.19991
	-59.0598	-58.9154		-56.0918	-56.8202				-57.5286	-57.7096		1.71108	1.53043																4.55155	0.319638		0.809962	-0.170685		1.19958
	-59.01	-58.8775		-56.043	-56.7812				-57.5186	-57.6266		1.74157	1.59536																4.55556	0.319294		0.809627	-0.171038		1.19926
	-58.9596	-58.8362		-55.9921	-56.7412				-57.5132	-57.5526		1.77368	1.65399																4.55956	0.318951		0.809292	-0.171391		1.19893
	-58.9086	-58.792		-55.939	-56.7003				-57.5059	-57.4931		1.80723	1.70615																4.56356	0.318608		0.808958	-0.171742		1.1986
	-58.8568	-58.7454		-55.8838	-56.6585				-57.4902	-57.4477		1.84183	1.75215																4.56757	0.318266		0.808625	-0.172094		1.19828
	-58.804	-58.6971		-55.8264	-56.6158				-57.4611	-57.413		1.87689	1.79268																4.57157	0.317924		0.808292	-0.172445		1.19795
	-58.7498	-58.6474		-55.767	-56.5724				-57.4176	-57.3849		1.91168	1.82872																4.57558	0.317583		0.80796	-0.172795		1.19763
	-58.6939	-58.5966		-55.7056	-56.5282				-57.3627	-57.3614		1.94538	1.8614																4.57958	0.317242		0.807629	-0.173145		1.1973
	-58.6361	-58.5449		-55.6425	-56.4835				-57.3024	-57.3429		1.97721	1.89189																4.58358	0.316902		0.807298	-0.173494		1.19698
	-58.576	-58.4928		-55.5778	-56.4382				-57.242	-57.3303		2.00646	1.92125																4.58759	0.316562		0.806967	-0.173843		1.19665
	-58.5136	-58.4405		-55.5117	-56.3925				-57.1838	-57.3204		2.0326	1.95035																4.59159	0.316223		0.806637	-0.174192		1.19633
	-58.4492	-58.3885		-55.4443	-56.3465				-57.1271	-57.3053		2.05527	1.97983																4.5956	0.315884		0.806308	-0.17454		1.19601
	-58.3832	-58.3374		-55.3758	-56.3001				-57.0709	-57.2764		2.07435	2.01																4.5996	0.315546		0.80598	-0.174887		1.19569
	-58.3165	-58.2877		-55.3063	-56.2534				-57.0171	-57.2299		2.0899	2.04094																4.6036	0.315209		0.805651	-0.175234		1.19537
	-58.2499	-58.2398		-55.2361	-56.2064				-56.9702	-57.1708		2.10219	2.07251																4.60761	0.314871		0.805324	-0.175581		1.19505
	-58.1845	-58.194		-55.1651	-56.1589				-56.9337	-57.1101		2.11159	2.10442																4.61161	0.314535		0.804997	-0.175927		1.19473
	-58.1213	-58.1501		-55.0936	-56.111				-56.9068	-57.0576		2.11857	2.13635																4.61562	0.314199		0.80467	-0.176273		1.19441
	-58.0613	-58.1077		-55.0215	-56.0626				-56.8847	-57.0156		2.12358	2.16802																4.61962	0.313863		0.804344	-0.176618		1.19409
	-58.005	-58.066		-54.9488	-56.0134				-56.8614	-56.9777		2.12707	2.19927																4.62362	0.313528		0.804019	-0.176962		1.19377
	-57.9527	-58.0239		-54.8756	-55.9636				-56.8324	-56.9321		2.12941	2.23012																4.62763	0.313194		0.803694	-0.177306		1.19346
	-57.9044	-57.9805		-54.8018	-55.9129				-56.7954	-56.8703		2.13088	2.26081																4.63163	0.31286		0.80337	-0.17765		1.19314
	-57.8594	-57.9348		-54.7274	-55.8614				-56.7499	-56.794		2.13169	2.29176																4.63564	0.312527		0.803047	-0.177993		1.19282
	-57.817	-57.8859		-54.6524	-55.8091				-56.6976	-56.7165		2.13201	2.32357																4.63964	0.312194		0.802724	-0.178336		1.19251
	-57.7764	-57.8334		-54.5765	-55.7558				-56.6421	-56.6556		2.13194	2.35696																4.64364	0.311861		0.802401	-0.178678		1.1922
	-57.7367	-57.7771		-54.4998	-55.7017				-56.5876	-56.6221		2.13165	2.39268																4.64765	0.311529		0.802079	-0.17902		1.19188
	-57.6971	-57.7171		-54.4221	-55.6467				-56.5358	-56.6134		2.13135	2.43145																4.65165	0.311198		0.801758	-0.179362		1.19157
	-57.6571	-57.6537		-54.3433	-55.5908				-56.4854	-56.6154		2.13134	2.4739																4.65566	0.310867		0.801437	-0.179702		1.19125
	-57.6164	-57.5876		-54.263	-55.5338				-56.4344	-56.6104		2.13206	2.52047																4.65966	0.310537		0.801117	-0.180043		1.19094
	-57.5751	-57.5194		-54.181	-55.4758				-56.3839	-56.5852		2.13407	2.5714																4.66366	0.310207		0.800797	-0.180383		1.19063
	-57.533	-57.4497		-54.0971	-55.4165				-56.3386	-56.5345		2.13805	2.6267																4.66767	0.309878		0.800478	-0.180722		1.19032
	-57.4902	-57.3791		-54.0107	-55.3559				-56.3033	-56.4605		2.1448	2.68611																4.67167	0.309549		0.800159	-0.181061		1.19001
	-57.4462	-57.3079		-53.9215	-55.2937				-56.2786	-56.3712		2.15519	2.74911																4.67568	0.309221		0.799841	-0.1814		1.1897
	-57.4007	-57.2367		-53.8288	-55.2297				-56.2598	-56.2781		2.17007	2.81496																4.67968	0.308893		0.799524	-0.181738		1.18939
	-57.3528	-57.1656		-53.7323	-55.1639				-56.2379	-56.1938		2.19029	2.8827																4.68368	0.308566		0.799207	-0.182075		1.18908
	-57.3016	-57.0949		-53.6312	-55.0959				-56.2041	-56.1274		2.21656	2.9512																4.68769	0.308239		0.79889	-0.182412		1.18877
	-57.2462	-57.0249		-53.525	-55.0257				-56.1544	-56.0818		2.24945	3.01919																4.69169	0.307913		0.798575	-0.182749		1.18847
	-57.1859	-56.956		-53.4131	-54.9532				-56.0916	-56.052		2.28929	3.08533																4.6957	0.307587		0.798259	-0.183085		1.18816
	-57.1203	-56.8884		-53.2951	-54.8783				-56.025	-56.0269		2.33616	3.14825																4.6997	0.307262		0.797945	-0.183421		1.18785
	-57.0493	-56.8222		-53.1705	-54.8011				-55.9665	-55.9942		2.38984	3.2066																4.7037	0.306937		0.79763	-0.183756		1.18755
	-56.9733	-56.7576		-53.039	-54.7214				-55.9244	-55.9437		2.4498	3.25915																4.70771	0.306613		0.797317	-0.184091		1.18724
	-56.8929	-56.6944		-52.9003	-54.6393				-55.8996	-55.8705		2.51519	3.30484																4.71171	0.306289		0.797004	-0.184426		1.18694
	-56.8088	-56.6321		-52.7543	-54.5549				-55.8845	-55.7767		2.58491	3.3428																4.71572	0.305966		0.796691	-0.18476		1.18663
	-56.7216	-56.5703		-52.601	-54.4681				-55.867	-55.6708		2.65761	3.37247																4.71972	0.305643		0.796379	-0.185093		1.18633
	-56.6321	-56.5081		-52.4403	-54.3789				-55.8363	-55.5645		2.73177	3.39357																4.72372	0.305321		0.796068	-0.185426		1.18603
	-56.5404	-56.4445		-52.2724	-54.2874				-55.7873	-55.4671		2.8058	3.40614																4.72773	0.304999		0.795757	-0.185759		1.18572
	-56.4468	-56.3787		-52.0974	-54.1934				-55.7201	-55.3815		2.87809	3.41051																4.73173	0.304678		0.795446	-0.186091		1.18542
	-56.3512	-56.3095		-51.9154	-54.0969				-55.6385	-55.3049		2.94712	3.40726																4.73574	0.304357		0.795136	-0.186422		1.18512
	-56.2534	-56.236		-51.7267	-53.9979				-55.5472	-55.2327		3.01151	3.39714																4.73974	0.304037		0.794827	-0.186753		1.18482
	-56.153	-56.1576		-51.5315	-53.8963				-55.4528	-55.1629		3.07013	3.38097																4.74374	0.303717		0.794518	-0.187084		1.18452
	-56.0501	-56.0738		-51.3299	-53.792				-55.3623	-55.0971		3.12213	3.35956																4.74775	0.303398		0.79421	-0.187415		1.18422
	-55.9443	-55.9844		-51.1221	-53.6849				-55.2816	-55.038		3.16695	3.33362																4.75175	0.303079		0.793903	-0.187744		1.18392
	-55.8357	-55.8899		-50.9081	-53.575				-55.2128	-54.987		3.20435	3.30365																4.75576	0.302761		0.793595	-0.188074		1.18362
	-55.724	-55.791		-50.6879	-53.4624				-55.1531	-54.9428		3.23439	3.26993																4.75976	0.302443		0.793289	-0.188403		1.18333
	-55.6091	-55.6888		-50.4615	-53.347				-55.0975	-54.9014		3.25739	3.23247																4.76376	0.302126		0.792983	-0.188731		1.18303
	-55.4904	-55.5847		-50.2288	-53.2289				-55.0416	-54.857		3.2739	3.19106																4.76777	0.301809		0.792677	-0.189059		1.18273
	-55.3673	-55.4801		-49.9897	-53.1082				-54.9837	-54.8047		3.28463	3.14531																4.77177	0.301493		0.792372	-0.189387		1.18244
	-55.2389	-55.3765		-49.744	-52.985				-54.9233	-54.7416		3.29044	3.09474																4.77578	0.301177		0.792068	-0.189714		1.18214
	-55.1041	-55.2746		-49.4915	-52.8595				-54.8604	-54.6684		3.29222	3.03892																4.77978	0.300862		0.791764	-0.190041		1.18185
	-54.9619	-55.1751		-49.2318	-52.7318				-54.7943	-54.5876		3.29093	2.97754																4.78378	0.300547		0.791461	-0.190367		1.18155
	-54.8115	-55.078		-48.9649	-52.6022				-54.7244	-54.5017		3.28752	2.91053																4.78779	0.300233		0.791158	-0.190693		1.18126
	-54.6524	-54.9827		-48.6903	-52.4708				-54.6508	-54.4125		3.28291	2.83814																4.79179	0.299919		0.790855	-0.191018		1.18096
	-54.4844	-54.8884		-48.4079	-52.3379				-54.5745	-54.3222		3.27796	2.76096																4.7958	0.299605		0.790554	-0.191343		1.18067
	-54.308	-54.7939		-48.1174	-52.2037				-54.4976	-54.2351		3.27352	2.67996																4.7998	0.299292		0.790252	-0.191667		1.18038
	-54.1238	-54.698		-47.8186	-52.0685				-54.4229	-54.1574		3.27032	2.59641																4.8038	0.29898		0.789952	-0.191991		1.18009
	-53.9327	-54.5998		-47.5115	-51.9324				-54.3539	-54.096		3.26906	2.51181																4.80781	0.298668		0.789651	-0.192315		1.1798
	-53.7357	-54.4985		-47.1957	-51.7958				-54.293	-54.0556		3.27032	2.42781																4.81181	0.298357		0.789352	-0.192638		1.17951
	-53.5339	-54.3937		-46.8712	-51.6589				-54.2406	-54.0374		3.27459	2.34607																4.81582	0.298046		0.789053	-0.192961		1.17922
	-53.328	-54.2853		-46.5378	-51.5218				-54.194	-54.0378		3.28225	2.26817																4.81982	0.297735		0.788754	-0.193283		1.17893
	-53.1183	-54.1737		-46.1954	-51.3848				-54.1478	-54.0477		3.29355	2.1955																4.82382	0.297425		0.788456	-0.193605		1.17864
	-52.9052	-54.0597		-45.8437	-51.2481				-54.0966	-54.0534		3.3086	2.12917																4.82783	0.297116		0.788158	-0.193927		1.17835
	-52.6884	-53.9443		-45.4825	-51.1119				-54.0366	-54.0406		3.32736	2.06997																4.83183	0.296807		0.787861	-0.194247		1.17806
	-52.4676	-53.8285		-45.1115	-50.9762				-53.9673	-53.9998		3.34962	2.01833																4.83584	0.296498		0.787565	-0.194568		1.17778
	-52.2423	-53.7135		-44.7303	-50.8413				-53.8908	-53.9319		3.37499	1.97436																4.83984	0.29619		0.787269	-0.194888		1.17749
	-52.0118	-53.6004		-44.3385	-50.7073				-53.8112	-53.8482		3.40293	1.93784																4.84384	0.295883		0.786973	-0.195208		1.1772
	-51.7756	-53.4901		-43.9356	-50.5743				-53.7331	-53.7666		3.4327	1.90826																4.84785	0.295576		0.786678	-0.195527		1.17692
	-51.5331	-53.3832		-43.5211	-50.4425				-53.6598	-53.7039		3.46339	1.88486																4.85185	0.295269		0.786384	-0.195846		1.17663
	-51.2841	-53.2798		-43.0943	-50.312				-53.5925	-53.6691		3.49396	1.8667																4.85586	0.294963		0.78609	-0.196164		1.17635
	-51.028	-53.18		-42.6548	-50.1829				-53.53	-53.6604		3.5232	1.85264																4.85986	0.294657		0.785797	-0.196482		1.17607
	-50.7648	-53.0832		-42.2018	-50.0555				-53.4695	-53.6659		3.54981	1.84143																4.86386	0.294352		0.785504	-0.1968		1.17578
	-50.494	-52.9887		-41.7349	-49.9298				-53.4079	-53.6689		3.57239	1.83172																4.86787	0.294047		0.785211	-0.197117		1.1755
	-50.2156	-52.8955		-41.2534	-49.8062				-53.3427	-53.6546		3.58953	1.82209																4.87187	0.293743		0.784919	-0.197433		1.17522
	-49.9294	-52.8024		-40.757	-49.6848				-53.2725	-53.6171		3.59981	1.81106																4.87588	0.293439		0.784628	-0.19775		1.17494
	-49.635	-52.7085		-40.2453	-49.5659				-53.1969	-53.5615		3.60189	1.79721																4.87988	0.293136		0.784337	-0.198065		1.17466
	-49.3326	-52.6129		-39.7181	-49.4497				-53.1159	-53.4999		3.59456	1.77913																4.88388	0.292833		0.784047	-0.198381		1.17438
	-49.022	-52.5148		-39.1753	-49.3367				-53.0301	-53.4449		3.57675	1.75557																4.88789	0.292531		0.783757	-0.198696		1.1741
	-48.7036	-52.4139		-38.6172	-49.2269				-52.9394	-53.4027		3.54765	1.72548																4.89189	0.292229		0.783468	-0.19901		1.17382
	-48.3779	-52.3103		-38.044	-49.1209				-52.8443	-53.3711		3.50667	1.68806																4.8959	0.291927		0.783179	-0.199324		1.17354
	-48.0454	-52.2043		-37.4564	-49.0188				-52.747	-53.3418		3.45351	1.64285																4.8999	0.291626		0.782891	-0.199638		1.17326
	-47.7068	-52.0967		-36.8551	-48.921				-52.6527	-53.3055		3.38815	1.58979																4.9039	0.291326		0.782603	-0.199951		1.17298
	-47.3627	-51.9887		-36.2413	-48.8277				-52.5684	-53.2573		3.31083	1.5292																4.90791	0.291026		0.782316	-0.200264		1.17271
	-47.0134	-51.8815		-35.616	-48.7391				-52.4988	-53.199		3.22204	1.46184																4.91191	0.290726		0.782029	-0.200576		1.17243
	-46.6593	-51.7766		-34.9808	-48.6553				-52.4437	-53.1387		3.12249	1.38888																4.91592	0.290427		0.781743	-0.200888		1.17215
	-46.3003	-51.6756		-34.3373	-48.5766				-52.3974	-53.0873		3.01306	1.31178																4.91992	0.290129		0.781457	-0.2012		1.17188
	-45.9363	-51.5798		-33.6871	-48.5029				-52.3518	-53.0536		2.89476	1.23229																4.92392	0.28983		0.781172	-0.201511		1.1716
	-45.567	-51.4904		-33.0321	-48.4343				-52.3002	-53.0394		2.76868	1.1523																4.92793	0.289533		0.780887	-0.201822		1.17133
	-45.1925	-51.408		-32.3742	-48.3706				-52.2404	-53.0396		2.63597	1.0737																4.93193	0.289235		0.780603	-0.202132		1.17105
	-44.8127	-51.333		-31.7154	-48.3119				-52.1752	-53.0454		2.49776	0.998304																4.93594	0.288939		0.780319	-0.202442		1.17078
	-44.428	-51.2651		-31.0575	-48.2579				-52.1102	-53.0494		2.3552	0.927692																4.93994	0.288642		0.780036	-0.202752		1.17051
	-44.0389	-51.2038		-30.4027	-48.2085				-52.0516	-53.048		2.20937	0.86312																4.94394	0.288346		0.779753	-0.203061		1.17024
	-43.6462	-51.148		-29.7528	-48.1636				-52.0033	-53.0417		2.06133	0.805429																4.94795	0.288051		0.779471	-0.203369		1.16996
	-43.2507	-51.0965		-29.1099	-48.123				-51.9655	-53.0322		1.91204	0.754995																4.95195	0.287756		0.779189	-0.203677		1.16969
	-42.8534	-51.0479		-28.4759	-48.0866				-51.9354	-53.021		1.76243	0.711706																4.95596	0.287461		0.778908	-0.203985		1.16942
	-42.455	-51.001		-27.8525	-48.0543				-51.9091	-53.0087		1.61333	0.674978																4.95996	0.287167		0.778628	-0.204293		1.16915
	-42.0563	-50.9549		-27.2416	-48.0261				-51.8841	-52.9964		1.46553	0.643803																4.96396	0.286874		0.778347	-0.2046		1.16888
	-41.6576	-50.9088		-26.645	-48.0018				-51.8599	-52.9865		1.31971	0.616834																4.96797	0.286581		0.778068	-0.204906		1.16861
	-41.2588	-50.8627		-26.0641	-47.9815				-51.8377	-52.9815		1.17653	0.592489																4.97197	0.286288		0.777788	-0.205212		1.16835
	-40.8595	-50.8168		-25.5007	-47.9651				-51.8183	-52.9815		1.03657	0.569079																4.97598	0.285996		0.77751	-0.205518		1.16808
	-40.4584	-50.7719		-24.956	-47.9524				-51.8021	-52.982		0.900381	0.544943																4.97998	0.285704		0.777232	-0.205823		1.16781
	-40.0541	-50.7291		-24.4313	-47.9434				-51.7886	-52.9763		0.768466	0.518585																4.98398	0.285413		0.776954	-0.206128		1.16754
	-39.6445	-50.6896		-23.9279	-47.9379				-51.7775	-52.9591		0.641327	0.488796																4.98799	0.285122		0.776677	-0.206433		1.16728
	-39.2275	-50.6545		-23.4468	-47.9358				-51.7686	-52.9306		0.519462	0.454758																4.99199	0.284831		0.7764	-0.206737		1.16701
	-38.8013	-50.6246		-22.9889	-47.9368				-51.7625	-52.8954		0.403382	0.416125																4.996	0.284541		0.776124	-0.207041		1.16675
	-38.3643	-50.6003		-22.5551	-47.9407				-51.7597	-52.8595		0.293615	0.373057																5	0.284252		0.775848	-0.207344		1.16648
	-37.9154	-50.5812		-22.146	-47.9471				-51.7598	-52.8276		0.190705	0.326223
	-37.4541	-50.5668		-21.7624	-47.9559				-51.7607	-52.803		0.0951951	0.276763
	-36.9807	-50.5558		-21.4047	-47.9667				-51.7605	-52.7884		0.00760927	0.226216
	-36.4955	-50.5469		-21.0734	-47.9794				-51.7589	-52.7851		-0.0715868	0.176405
	-35.9992	-50.5387		-20.7689	-47.9938				-51.7584	-52.7923		-0.142026	0.129318
	-35.4928	-50.5301		-20.4913	-48.0097				-51.7623	-52.8071		-0.203485	0.0869615
	-34.9766	-50.5202		-20.241	-48.0271				-51.7728	-52.826		-0.255929	0.0512182
	-34.451	-50.5087		-20.0179	-48.0457				-51.7898	-52.8473		-0.299543	0.0237188
	-33.9162	-50.4957		-19.822	-48.0658				-51.8125	-52.8704		-0.334757	0.00572772
	-33.3717	-50.4815		-19.6532	-48.0872				-51.8395	-52.894		-0.362245	-0.0019401
	-32.8171	-50.4668		-19.5113	-48.1099				-51.869	-52.915		-0.382905	0.00102788
	-32.252	-50.4523		-19.396	-48.134				-51.8976	-52.9294		-0.397823	0.0144236
	-31.6757	-50.4387		-19.3069	-48.1594				-51.9209	-52.9344		-0.40821	0.037533
	-31.0882	-50.4266		-19.2435	-48.1862				-51.9353	-52.9307		-0.41533	0.0691799
	-30.49	-50.4164		-19.2054	-48.2143				-51.9393	-52.9221		-0.420421	0.107795
	-29.8821	-50.4085		-19.1919	-48.2436				-51.9337	-52.9137		-0.424625	0.151502
	-29.2668	-50.4028		-19.2026	-48.2742				-51.9206	-52.9088		-0.428913	0.198219
	-28.6473	-50.3993		-19.2367	-48.3058				-51.9024	-52.9065		-0.434046	0.245766
	-28.0275	-50.3979		-19.2938	-48.3384				-51.8824	-52.9031		-0.440544	0.291969
	-27.4123	-50.3984		-19.3732	-48.3719				-51.8662	-52.8951		-0.448688	0.334771
	-26.8068	-50.4003		-19.4742	-48.406				-51.8619	-52.8828		-0.458542	0.372324
	-26.2165	-50.4035		-19.5965	-48.4406				-51.8765	-52.8694		-0.469988	0.403087
	-25.6462	-50.4076		-19.7393	-48.4755				-51.9109	-52.8573		-0.482783	0.425892
	-25.1005	-50.4122		-19.9022	-48.5106				-51.9569	-52.845		-0.496612	0.440007
	-24.5834	-50.417		-20.0848	-48.5457				-51.9998	-52.8281		-0.51114	0.445176
	-24.0981	-50.4216		-20.2864	-48.5805				-52.0275	-52.8033		-0.526052	0.44163
	-23.6472	-50.426		-20.5066	-48.6149				-52.0364	-52.7714		-0.541084	0.430077
	-23.233	-50.4302		-20.745	-48.6488				-52.0324	-52.7377		-0.556029	0.411666
	-22.8574	-50.4345		-21.0011	-48.682				-52.0251	-52.7088		-0.570732	0.387913
	-22.5219	-50.4396		-21.2743	-48.7144				-52.0211	-52.6898		-0.585073	0.360613
	-22.2278	-50.446		-21.5641	-48.7458				-52.0222	-52.6821		-0.598941	0.331727
	-21.9759	-50.4546		-21.8699	-48.7761				-52.0281	-52.6832		-0.612203	0.303248
	-21.7671	-50.4661		-22.1912	-48.8054				-52.0387	-52.6899		-0.62468	0.277073
	-21.6016	-50.4811		-22.5272	-48.8336				-52.0547	-52.6995		-0.63613	0.254873
	-21.4795	-50.5		-22.8772	-48.8606				-52.0749	-52.7114		-0.64624	0.237976
	-21.4005	-50.5228		-23.2404	-48.8865				-52.0956	-52.7253		-0.654626	0.22729
	-21.3644	-50.5492		-23.6161	-48.9115				-52.1125	-52.7408		-0.660852	0.223242
	-21.3708	-50.5788		-24.0034	-48.9354				-52.1249	-52.7565		-0.664448	0.225767
	-21.419	-50.6109		-24.4015	-48.9586				-52.1359	-52.7701		-0.66494	0.234337
	-21.5087	-50.6447		-24.8096	-48.981				-52.1506	-52.7785		-0.661872	0.248021
	-21.6394	-50.6795		-25.2269	-49.0029				-52.1712	-52.779		-0.65484	0.265582
	-21.8105	-50.7145		-25.6526	-49.0244				-52.1961	-52.7708		-0.64351	0.285594
	-22.0218	-50.7494		-26.086	-49.0456				-52.2205	-52.7559		-0.627636	0.306561
	-22.2725	-50.7837		-26.5264	-49.0667				-52.24	-52.7367		-0.607074	0.327039
	-22.5623	-50.8171		-26.9732	-49.0877				-52.2531	-52.714		-0.581793	0.345744
	-22.8904	-50.8494		-27.4257	-49.1088				-52.2614	-52.6875		-0.551878	0.361621
	-23.2561	-50.8804		-27.8833	-49.13				-52.2678	-52.6577		-0.517532	0.373895
	-23.6587	-50.9097		-28.3454	-49.1513				-52.2747	-52.6289		-0.479083	0.382078
	-24.0969	-50.937		-28.8113	-49.1727				-52.2827	-52.6076		-0.436983	0.385951
	-24.5694	-50.9621		-29.2804	-49.1942				-52.2915	-52.5987		-0.391808	0.385511
	-25.0745	-50.9849		-29.7519	-49.2156				-52.3009	-52.6009		-0.344253	0.380914
	-25.6099	-51.0055		-30.2249	-49.2367				-52.3121	-52.6082		-0.295127	0.372403
	-26.1732	-51.0242		-30.6986	-49.2575				-52.3261	-52.6136		-0.245336	0.360254
	-26.7614	-51.0415		-31.1719	-49.2778				-52.3425	-52.6144		-0.195866	0.344732
	-27.3714	-51.0582		-31.6439	-49.2973				-52.3584	-52.6128		-0.147745	0.326072
	-27.9998	-51.0747		-32.1133	-49.316				-52.3687	-52.613		-0.102013	0.304494
	-28.6431	-51.0917		-32.5791	-49.3338				-52.3692	-52.6165		-0.0596784	0.280229
	-29.2976	-51.1096		-33.0402	-49.3504				-52.3585	-52.62		-0.0216682	0.253578
	-29.9596	-51.1283		-33.4953	-49.366				-52.3392	-52.6178		0.011213	0.224968
	-30.6256	-51.148		-33.9434	-49.3804				-52.3171	-52.6058		0.0383258	0.195001
	-31.2921	-51.1684		-34.3834	-49.3938				-52.2976	-52.5832		0.0592287	0.164492
	-31.9559	-51.1893		-34.8146	-49.4063				-52.2839	-52.5523		0.0737011	0.13448
	-32.6141	-51.2105		-35.2359	-49.4181				-52.2764	-52.5168		0.081753	0.106194
	-33.2642	-51.232		-35.6469	-49.4292				-52.2737	-52.4816		0.0836224	0.0809998
	-33.9039	-51.2537		-36.0469	-49.4399				-52.2744	-52.4545		0.0797593	0.0603039
	-34.5316	-51.2756		-36.4356	-49.4503				-52.2773	-52.4456		0.070799	0.0454454
	-35.146	-51.2978		-36.8126	-49.4607				-52.2803	-52.4644		0.057526	0.0375763
	-35.7462	-51.3201		-37.1779	-49.4712				-52.281	-52.5135		0.0408332	0.0375525
	-36.3314	-51.3426		-37.5314	-49.4818				-52.2779	-52.5834		0.0216764	0.0458467
	-36.9011	-51.3651		-37.8733	-49.4927				-52.2717	-52.6546		0.00103027	0.0624961
	-37.4548	-51.3875		-38.2036	-49.504				-52.266	-52.7046		-0.0201547	0.0870927
	-37.992	-51.4098		-38.5226	-49.5156				-52.2645	-52.7197		-0.0409901	0.118816
	-38.5123	-51.4316		-38.8307	-49.5277				-52.2685	-52.7004		-0.0606824	0.156503
	-39.0152	-51.453		-39.1279	-49.5403				-52.2761	-52.6594		-0.0785591	0.198751
	-39.5001	-51.4736		-39.4147	-49.5533				-52.2837	-52.6127		-0.0940864	0.244027
	-39.9669	-51.4932		-39.6914	-49.5668				-52.289	-52.5716		-0.10688	0.290786
	-40.4152	-51.5112		-39.9581	-49.5809				-52.2928	-52.5392		-0.11671	0.337568
	-40.8451	-51.5274		-40.2152	-49.5956				-52.2979	-52.5141		-0.123491	0.38307
	-41.257	-51.5412		-40.4628	-49.6108				-52.3065	-52.4954		-0.127272	0.426187
	-41.6513	-51.5524		-40.7012	-49.6265				-52.3183	-52.4847		-0.128219	0.466021
	-42.0286	-51.5607		-40.9307	-49.6427				-52.3303	-52.4845		-0.126581	0.501858
	-42.3897	-51.5662		-41.1513	-49.6593				-52.3387	-52.4946		-0.122668	0.533123
	-42.7353	-51.5693		-41.3634	-49.6763				-52.3408	-52.5099		-0.116812	0.559333
	-43.0662	-51.5704		-41.5672	-49.6933				-52.3361	-52.5219		-0.109337	0.580047
	-43.383	-51.5703		-41.763	-49.7105				-52.3268	-52.5224		-0.100523	0.594837
	-43.6863	-51.5696		-41.9509	-49.7274				-52.3175	-52.5075		-0.0905844	0.603273
	-43.9764	-51.5691		-42.1314	-49.7441				-52.313	-52.4801		-0.079647	0.604946
	-44.2538	-51.5695		-42.3047	-49.7603				-52.316	-52.4476		-0.0677404	0.59951
	-44.5189	-51.5712		-42.4713	-49.776				-52.3256	-52.4175		-0.0547981	0.586741
	-44.7719	-51.5748		-42.6314	-49.791				-52.3378	-52.3933		-0.0406701	0.566611
	-45.0132	-51.5808		-42.7854	-49.8051				-52.3474	-52.3737		-0.025146	0.53936
	-45.2433	-51.5897		-42.9337	-49.8184				-52.3501	-52.3553		-0.00798726	0.505549
	-45.4627	-51.6019		-43.0766	-49.8308				-52.3443	-52.3356		0.0110347	0.466092
	-45.672	-51.618		-43.2145	-49.8423				-52.3319	-52.3135		0.0320971	0.42225
	-45.8717	-51.6381		-43.3477	-49.8528				-52.3183	-52.2899		0.0552869	0.375595
	-46.0624	-51.6622		-43.4763	-49.8625				-52.3103	-52.267		0.0805671	0.327926
	-46.2445	-51.6904		-43.6007	-49.8713				-52.3126	-52.2493		0.107753	0.281166
	-46.4185	-51.722		-43.7211	-49.8794				-52.3262	-52.2416		0.136501	0.237227
	-46.5844	-51.7562		-43.8376	-49.8867				-52.3477	-52.2477		0.166314	0.197873
	-46.7422	-51.7923		-43.9505	-49.8935				-52.3699	-52.2677		0.196555	0.164589
	-46.8921	-51.8289		-44.0598	-49.8998				-52.3844	-52.2979		0.226481	0.138461
	-47.034	-51.865		-44.1658	-49.9057				-52.3844	-52.3318		0.255283	0.120102
	-47.1683	-51.8995		-44.2684	-49.9115				-52.3673	-52.362		0.282127	0.10961
	-47.2954	-51.9314		-44.368	-49.9171				-52.3359	-52.3822		0.306204	0.106575
	-47.4162	-51.9601		-44.4646	-49.9229				-52.2979	-52.3893		0.32677	0.11013
	-47.5316	-51.9851		-44.5583	-49.9289				-52.2625	-52.3843		0.343179	0.119049
	-47.6426	-52.0063		-44.6494	-49.9352				-52.2373	-52.3722		0.354908	0.131864
	-47.7504	-52.0239		-44.7381	-49.942				-52.226	-52.3588		0.361568	0.147016
	-47.8554	-52.0384		-44.8244	-49.9494				-52.2275	-52.3472		0.362907	0.162992
	-47.9581	-52.0503		-44.9085	-49.9574				-52.2367	-52.3354		0.358807	0.178464
	-48.0581	-52.0603		-44.9905	-49.9661				-52.2462	-52.3193		0.349272	0.192395
	-48.1549	-52.0692		-45.0705	-49.9755				-52.2496	-52.2962		0.33442	0.204112
	-48.2475	-52.0776		-45.1487	-49.9857				-52.2436	-52.2689		0.314475	0.213338
	-48.335	-52.0858		-45.2248	-49.9964				-52.229	-52.244		0.28976	0.220177
	-48.4166	-52.094		-45.2991	-50.0077				-52.2106	-52.2279		0.260704	0.225067
	-48.492	-52.102		-45.3713	-50.0193				-52.1942	-52.2227		0.227838	0.228691
	-48.5612	-52.1094		-45.4414	-50.0311				-52.1829	-52.2267		0.191809	0.231873
	-48.6249	-52.1156		-45.5093	-50.0429				-52.1762	-52.2377		0.153376	0.235458
	-48.6841	-52.1199		-45.5749	-50.0545				-52.1706	-52.254		0.113414	0.240205
	-48.7398	-52.1219		-45.6381	-50.0656				-52.1631	-52.2735		0.0729012	0.246678
	-48.7932	-52.1211		-45.699	-50.0761				-52.1542	-52.2912		0.0329005	0.255179
	-48.8449	-52.1177		-45.7576	-50.0858				-52.1472	-52.3012		-0.00547168	0.265691
	-48.8956	-52.1119		-45.8139	-50.0945				-52.1457	-52.3		-0.041085	0.277871
	-48.9453	-52.1043		-45.868	-50.1023				-52.1517	-52.2888		-0.0728425	0.291061
	-48.9939	-52.0956		-45.9203	-50.1091				-52.1646	-52.2714		-0.0997318	0.30433
	-49.0413	-52.0865		-45.9708	-50.1147				-52.1828	-52.2514		-0.120875	0.316542
	-49.0873	-52.0778		-46.0199	-50.1194				-52.204	-52.2313		-0.135575	0.326432
	-49.1318	-52.0699		-46.0678	-50.1231				-52.2259	-52.2136		-0.143354	0.332698
	-49.1748	-52.0632		-46.1149	-50.1258				-52.2449	-52.2011		-0.14398	0.334087
	-49.2162	-52.0581		-46.1614	-50.1277				-52.2569	-52.1946		-0.137481	0.329481
	-49.256	-52.0547		-46.2074	-50.1289				-52.2594	-52.1919		-0.124151	0.317979
	-49.2938	-52.0532		-46.2533	-50.1295				-52.2535	-52.1882		-0.104534	0.298959
	-49.3291	-52.0536		-46.299	-50.1295				-52.2443	-52.1792		-0.0794039	0.272137
	-49.3615	-52.056		-46.3446	-50.1292				-52.2377	-52.163		-0.0497326	0.237609
	-49.3903	-52.0604		-46.3899	-50.1286				-52.2379	-52.142		-0.0166466	0.195873
	-49.4153	-52.0665		-46.4349	-50.1278				-52.2454	-52.1213		0.0186213	0.147845
	-49.4367	-52.0739		-46.4794	-50.1269				-52.2578	-52.1064		0.0547868	0.0948489
	-49.4549	-52.0821		-46.523	-50.1261				-52.2706	-52.0998		0.0905723	0.0385922
	-49.4708	-52.0902		-46.5655	-50.1254				-52.2788	-52.1003		0.124766	-0.0188809
	-49.4857	-52.0975		-46.6067	-50.1248				-52.2785	-52.1037		0.15628	-0.075258
	-49.5009	-52.1031		-46.6464	-50.1243				-52.2681	-52.1064		0.184203	-0.128048
	-49.5174	-52.1061		-46.6842	-50.1239				-52.2492	-52.1076		0.207841	-0.174694
	-49.5359	-52.1059		-46.7203	-50.1235				-52.2258	-52.1094		0.226755	-0.212696
	-49.5566	-52.1021		-46.7546	-50.1229				-52.2029	-52.1157		0.240772	-0.239755
	-49.5795	-52.0947		-46.7872	-50.1221				-52.1836	-52.1299		0.249986	-0.253914
	-49.6038	-52.084		-46.8184	-50.1208				-52.1685	-52.1539		0.254736	-0.253692
	-49.6287	-52.0707		-46.8483	-50.1189				-52.1566	-52.1866		0.255574	-0.238207
	-49.6532	-52.056		-46.8773	-50.1162				-52.1466	-52.2232		0.253205	-0.207265
	-49.6765	-52.041		-46.9057	-50.1127				-52.1387	-52.2576		0.248434	-0.161415
	-49.6979	-52.0272		-46.9338	-50.1083				-52.135	-52.2847		0.242093	-0.101954
	-49.7171	-52.0159		-46.9618	-50.1029				-52.1378	-52.3036		0.23498	-0.0308898
	-49.7339	-52.0081		-46.9898	-50.0967				-52.1477	-52.3164		0.227798	0.049157
	-49.7484	-52.0043		-47.0179	-50.0897				-52.1624	-52.3263		0.221117	0.135091
	-49.7608	-52.0043		-47.0462	-50.0823				-52.1776	-52.334		0.215342	0.22352
	-49.7715	-52.0078		-47.0744	-50.0747				-52.1878	-52.3367		0.210702	0.310962
	-49.7809	-52.0135		-47.1024	-50.0671				-52.1885	-52.3284		0.207259	0.394051
	-49.7893	-52.0202		-47.1301	-50.06				-52.1777	-52.3033		0.204929	0.469749
	-49.797	-52.0267		-47.1571	-50.0536				-52.1568	-52.2594		0.203508	0.535524
	-49.8043	-52.0319		-47.1831	-50.0482				-52.1311	-52.2009		0.202714	0.589488
	-49.8116	-52.0351		-47.2081	-50.0442				-52.1082	-52.1374		0.202218	0.630487
	-49.8189	-52.0361		-47.2317	-50.0417				-52.0948	-52.0804		0.201677	0.658127
	-49.8266	-52.0353		-47.2539	-50.0407				-52.0942	-52.0385		0.200762	0.67275
	-49.8345	-52.0336		-47.2746	-50.0415				-52.1042	-52.0143		0.199172	0.675343
	-49.8428	-52.032		-47.2938	-50.0438				-52.1177	-52.0045		0.196645	0.667414
	-49.851	-52.0313		-47.3115	-50.0476				-52.1267	-52.0035		0.192958	0.650828
	-49.8587	-52.0322		-47.3279	-50.0527				-52.1259	-52.0068		0.187928	0.627636
	-49.8653	-52.0351		-47.3431	-50.0588				-52.1158	-52.0123		0.181407	0.599901
	-49.87	-52.0398		-47.3574	-50.0656				-52.1007	-52.0198		0.173281	0.569546
	-49.8723	-52.0458		-47.3709	-50.0728				-52.0861	-52.0287		0.163471	0.538225
	-49.8715	-52.0523		-47.3841	-50.08				-52.0758	-52.0367		0.151936	0.507245
	-49.8675	-52.0586		-47.397	-50.0869				-52.0718	-52.0393		0.138689	0.477522
	-49.8605	-52.0642		-47.41	-50.0933				-52.0736	-52.0318		0.1238	0.44958
	-49.851	-52.0688		-47.4233	-50.0989				-52.0792	-52.0123		0.107416	0.423591
	-49.84	-52.0723		-47.437	-50.1036				-52.0845	-51.9839		0.0897707	0.399446
	-49.8287	-52.0752		-47.4514	-50.1071				-52.0848	-51.9548		0.0711915	0.376841
	-49.8186	-52.078		-47.4663	-50.1096				-52.0774	-51.9345		0.0521003	0.355373
	-49.8109	-52.081		-47.482	-50.111				-52.0631	-51.9286		0.0330067	0.334637
	-49.8066	-52.0847		-47.4982	-50.1112				-52.0466	-51.9361		0.0144927	0.31431
	-49.8062	-52.0894		-47.5149	-50.1106				-52.0346	-51.9494		-0.00281159	0.294208
	-49.8098	-52.0952		-47.5318	-50.109				-52.0331	-51.9581		-0.0182583	0.274331
	-49.8169	-52.1019		-47.5488	-50.1068				-52.0441	-51.9547		-0.0312169	0.254868
	-49.8267	-52.1092		-47.5655	-50.1038				-52.064	-51.9375		-0.0411102	0.236185
	-49.838	-52.1168		-47.5818	-50.1003				-52.0852	-51.911		-0.0474494	0.218782
	-49.8496	-52.1242		-47.5973	-50.0963				-52.1004	-51.8829		-0.049864	0.20323
	-49.8605	-52.1311		-47.6119	-50.0919				-52.1059	-51.8617		-0.0481242	0.190109
	-49.87	-52.137		-47.6255	-50.087				-52.103	-51.854		-0.0421544	0.179922
	-49.8776	-52.1418		-47.6379	-50.0817				-52.0968	-51.8631		-0.0320361	0.173037
	-49.8833	-52.1451		-47.6492	-50.076				-52.0929	-51.8868		-0.0180018	0.169622
	-49.8874	-52.147		-47.6595	-50.0699				-52.0949	-51.9177		-0.00041883	0.169614
	-49.8902	-52.1471		-47.669	-50.0635				-52.1021	-51.946		0.0202328	0.172709
	-49.8919	-52.1455		-47.6778	-50.057				-52.1109	-51.9639		0.0433872	0.178376
	-49.8928	-52.1421		-47.6862	-50.0504				-52.117	-51.968		0.0684216	0.185897
	-49.8927	-52.1366		-47.6946	-50.0439				-52.1178	-51.9588		0.0946837	0.194431
	-49.8915	-52.1289		-47.7031	-50.0376				-52.1127	-51.9389		0.121517	0.203083
	-49.8886	-52.1192		-47.7121	-50.0319				-52.1036	-51.9129		0.148281	0.210987
	-49.8837	-52.1075		-47.7217	-50.0267				-52.0931	-51.8867		0.174369	0.217379
	-49.8764	-52.0944		-47.7319	-50.0221				-52.0832	-51.8659		0.199217	0.221651
	-49.8666	-52.0806		-47.743	-50.0183				-52.0739	-51.8528		0.222319	0.223399
	-49.8542	-52.0671		-47.7548	-50.0152				-52.0645	-51.8446		0.243227	0.222431
	-49.8395	-52.0551		-47.7674	-50.0126				-52.055	-51.8359		0.261569	0.218764
	-49.8229	-52.0457		-47.7804	-50.0104				-52.0478	-51.8234		0.277053	0.212587
	-49.8051	-52.0396		-47.7937	-50.0084				-52.0459	-51.8098		0.289484	0.204222
	-49.7868	-52.0373		-47.8072	-50.0063				-52.0502	-51.8025		0.29878	0.194065
	-49.7691	-52.0389		-47.8205	-50.0038				-52.0574	-51.8079		0.30499	0.18254
	-49.7528	-52.0438		-47.8335	-50.0007				-52.0604	-51.8267		0.308307	0.170054
	-49.739	-52.0512		-47.8459	-49.9968				-52.0527	-51.8523		0.309087	0.156974
	-49.7282	-52.0597		-47.8577	-49.992				-52.0318	-51.8749		0.307853	0.143624
	-49.7208	-52.0682		-47.8687	-49.9862				-52.0014	-51.8866		0.305304	0.130311
	-49.7166	-52.0752		-47.879	-49.9794				-51.9698	-51.8833		0.302308	0.117364
	-49.7148	-52.0796		-47.8885	-49.9717				-51.9458	-51.8651		0.299912	0.105214
	-49.7144	-52.0806		-47.8974	-49.9634				-51.9345	-51.8354		0.299346	0.0944813
	-49.7141	-52.0775		-47.9057	-49.9545				-51.9357	-51.8002		0.302055	0.0860938
	-49.7126	-52.0701		-47.9137	-49.9453				-51.9452	-51.768		0.309753	0.0814195
	-49.7089	-52.0586		-47.9214	-49.936				-51.9583	-51.7481		0.324525	0.0824204
	-49.7026	-52.0432		-47.929	-49.9268				-51.9721	-51.747		0.348959	0.0918213
	-49.6938	-52.0247		-47.9363	-49.9178				-51.9854	-51.7656		0.386333	0.113287
	-49.6833	-52.0039		-47.9435	-49.909				-51.997	-51.7985		0.440834	0.151598
	-49.6721	-51.9817		-47.9502	-49.9003				-52.0048	-51.8355		0.517776	0.212792
	-49.6618	-51.9593		-47.9561	-49.8916				-52.0057	-51.8658		0.623797	0.30426
	-49.6534	-51.9377		-47.9607	-49.8823				-51.9971	-51.8812		0.766961	0.434719
	-49.6481	-51.9179		-47.9633	-49.8718				-51.9781	-51.8788		0.956715	0.61404
	-49.6461	-51.9005		-47.9626	-49.8592				-51.9501	-51.8612		1.20362	0.85284
	-49.6471	-51.886		-47.9573	-49.8432				-51.9167	-51.8347		1.51877	1.16181
	-49.6504	-51.8747		-47.9455	-49.822				-51.8837	-51.8067		1.91288	1.5507
	-49.6543	-51.8663		-47.9249	-49.7935				-51.8568	-51.7847		2.395	2.02698
	-49.6568	-51.8603		-47.8928	-49.7551				-51.8397	-51.7754		2.97081	2.5942
	-49.6551	-51.8555		-47.8457	-49.7039				-51.8341	-51.783		3.64069	3.25009
	-49.6459	-51.8503		-47.7804	-49.6368				-51.8395	-51.8073		4.3976	3.98464
	-49.6245	-51.8423		-47.6934	-49.5507				-51.8531	-51.8412		5.22507	4.77824
	-49.5842	-51.8277		-47.5815	-49.4432				-51.8691	-51.8724		6.09545	5.60029
	-49.5156	-51.8016		-47.4428	-49.3131				-51.8796	-51.8877		6.96886	6.40845
	-49.4056	-51.7569		-47.2773	-49.1608				-51.8778	-51.8799		7.7931	7.14899
	-49.2369	-51.6845		-47.0872	-48.9895				-51.8627	-51.8515		8.5048	7.7583
	-48.9882	-51.5735		-46.8786	-48.8058				-51.8396	-51.8134		9.032	8.1659
	-48.6361	-51.4113		-46.6618	-48.6202				-51.8182	-51.778		9.29834	8.29889
	-48.1584	-51.1859		-46.4518	-48.4477				-51.8053	-51.7505		9.22864	8.08776
	-47.5397	-50.8881		-46.2687	-48.3077				-51.7934	-51.7189		8.75561	7.47319
	-46.778	-50.5146		-46.1369	-48.2232				-51.7381	-51.6385		7.82727	6.41322
	-45.8923	-50.0722		-46.0843	-48.2203				-51.526	-51.4054		6.41433	4.89031
	-44.9282	-49.581		-46.1404	-48.3253				-50.9606	-50.8409		4.51676	2.91726
	-43.9614	-49.0763		-46.3336	-48.5635				-49.8193	-49.7366		2.16871	0.541284
	-43.096	-48.6087		-46.6883	-48.9552				-48.0089	-47.9922		-0.558989	-2.1545
	-42.4564	-48.2403		-47.222	-49.5135				-45.738	-45.7858		-3.55941	-5.05279
	-42.1743	-48.0386		-47.9415	-50.2411				-43.5417	-43.6277		-6.69351	-8.00725
	-42.3702	-48.067		-48.8405	-51.128				-42.0675	-42.1873		-9.7976	-10.8509
	-43.1339	-48.3747		-49.898	-52.1504				-41.7439	-41.9676		-12.6939	-13.4077
	-44.5055	-48.9862		-51.0774	-53.2701				-42.5814	-43.0524		-15.2032	-15.5056
	-46.4617	-49.8941		-52.3281	-54.4363				-44.2595	-45.1161		-17.1595	-16.9908
	-48.9097	-51.0554		-53.5875	-55.588				-46.4125	-47.6872		-18.4235	-17.7417
	-51.6905	-52.3932		-54.7854	-56.6583				-48.8803	-50.4554		-18.8956	-17.6803
	-54.5924	-53.8037		-55.8496	-57.5798				-51.728	-53.3811		-18.5256	-16.7812
	-57.3727	-55.1673		-56.711	-58.2897				-55.0192	-56.522		-17.3186	-15.0751
	-59.7849	-56.3632		-57.3107	-58.736				-58.5261	-59.7282		-15.3365	-12.6491
	-61.609	-57.2839		-57.6048	-58.8819				-61.6447	-62.4944		-12.6941	-9.64071
	-62.6784	-57.8492		-57.5686	-58.71				-63.6348	-64.1351		-9.55072	-6.22769
	-62.9011	-58.0153		-57.1998	-58.2239				-64.0248	-64.1704		-6.09822	-2.61459
	-62.2714	-57.7798		-56.5183	-57.4484				-62.8648	-62.6169		-2.54561	0.983454
	-60.8692	-57.1811		-55.5651	-56.4278				-60.6466	-59.9673		0.897178	4.3575
	-58.8489	-56.292		-54.3985	-55.2217				-57.9861	-56.8995		4.03551	7.32076
	-56.4179	-55.2091		-53.0892	-53.9				-55.3242	-53.9473		6.70434	9.72223
	-53.8099	-54.0402		-51.7141	-52.5374				-52.8342	-51.3498		8.77951	11.4567
	-51.2556	-52.891		-50.3498	-51.207				-50.5483	-49.1378		10.1849	12.4704
	-48.9571	-51.8532		-49.0672	-49.9745				-48.5524	-47.3334		10.8954	12.7619
	-47.0674	-50.9957		-47.9253	-48.8941				-47.0689	-46.0747		10.9346	12.3785
	-45.6791	-50.3598		-46.9688	-48.0048				-46.3549	-45.5616		10.3695	11.4085
	-44.8218	-49.9588		-46.2251	-47.3291				-46.5138	-45.8865		9.30128	9.97137
	-44.4683	-49.7801		-45.7047	-46.8733				-47.3934	-46.9156		7.85415	8.20495
	-44.5467	-49.7919		-45.402	-46.6283				-48.6538	-48.3209		6.16352	6.25348
	-44.9563	-49.9499		-45.2982	-46.5732				-49.9339	-49.7276		4.36438	4.25573
	-45.585	-50.2048		-45.3646	-46.6779				-50.9894	-50.8621		2.58111	2.33523
	-46.3242	-50.5095		-45.5663	-46.9072				-51.7312	-51.6145		0.919468	0.592935
	-47.081	-50.824		-45.866	-47.2242				-52.1843	-52.0125		-0.538814	-0.897214
	-47.7853	-51.1181		-46.227	-47.5937				-52.4232	-52.1538		-1.7386	-2.08981
	-48.3919	-51.3728		-46.6165	-47.9839				-52.5238	-52.1463		-2.65135	-2.96687
	-48.8798	-51.5789		-47.0067	-48.369				-52.5421	-52.075		-3.27282	-3.53462
	-49.247	-51.7355		-47.3762	-48.7291				-52.5135	-51.994		-3.6192	-3.81873
	-49.505	-51.8472		-47.7101	-49.0509				-52.4616	-51.9296		-3.72215	-3.85885
	-49.673	-51.9216		-47.9994	-49.3268				-52.4052	-51.8875		-3.62346	-3.70288
	-49.7725	-51.9673		-48.2406	-49.5541				-52.3604	-51.8621		-3.36995	-3.40179
	-49.8237	-51.9921		-48.4342	-49.7343				-52.3361	-51.8453		-3.00894	-3.00512
	-49.8437	-52.0029		-48.5836	-49.8713				-52.3306	-51.8335		-2.58457	-2.5576
	-49.8451	-52.0047		-48.6943	-49.9708				-52.3339	-51.8283		-2.1353	-2.09694
	-49.8365	-52.0009		-48.7725	-50.0393				-52.3343	-51.8322		-1.69232	-1.65265
	-49.8231	-51.9938		-48.8247	-50.083				-52.3258	-51.8438		-1.27899	-1.24582
	-49.8078	-51.9847		-48.8571	-50.1079				-52.3091	-51.8559		-0.911054	-0.889695
	-49.7918	-51.9742		-48.8749	-50.1192				-52.2876	-51.8584		-0.597353	-0.590674
	-49.7753	-51.9629		-48.8828	-50.1211				-52.2637	-51.8427		-0.340981	-0.349648
	-49.7583	-51.951		-48.8845	-50.117				-52.2373	-51.8067		-0.140534	-0.163404
	-49.7405	-51.9392		-48.8827	-50.1093				-52.2081	-51.7557		0.00860318	-0.0259721
	-49.7217	-51.9277		-48.8794	-50.0999				-52.1774	-51.7015		0.113088	0.0701751
	-49.7017	-51.9173		-48.8762	-50.0898				-52.1494	-51.6574		0.180616	0.133145
	-49.6806	-51.9084		-48.8739	-50.0799				-52.1295	-51.634		0.219132	0.170875
	-49.6584	-51.9016		-48.8731	-50.0705				-52.1223	-51.6362		0.236232	0.190597
	-49.6355	-51.8969		-48.874	-50.0619				-52.1295	-51.6622		0.238758	0.19851
	-49.6122	-51.8941		-48.8765	-50.054				-52.1477	-51.7039		0.232553	0.199609
	-49.5891	-51.8929		-48.8807	-50.0468				-52.1694	-51.7502		0.222327	0.197638
	-49.5669	-51.8924		-48.8862	-50.04				-52.186	-51.7899		0.211629	0.19515
	-49.5462	-51.8919		-48.8928	-50.0337				-52.1927	-51.8149		0.20288	0.193634
	-49.5279	-51.8905		-48.9002	-50.0275				-52.1913	-51.8213		0.19747	0.193681
	-49.5123	-51.8876		-48.9082	-50.0215				-52.1885	-51.8093		0.195872	0.195192
	-49.5	-51.8829		-48.9167	-50.0153				-52.1911	-51.7832		0.197804	0.197583
	-49.4909	-51.8766		-48.9255	-50.0092				-52.2011	-51.7503		0.202401	0.199997
	-49.4851	-51.869		-48.9344	-50.0029				-52.2141	-51.7183		0.208397	0.201488
	-49.4823	-51.8611		-48.9435	-49.9966				-52.2221	-51.6919		0.214318	0.201188
	-49.482	-51.854		-48.9527	-49.9905				-52.2181	-51.672		0.218666	0.198429
	-49.4836	-51.849		-48.9621	-49.9847				-52.2	-51.6574		0.220088	0.192826
	-49.4865	-51.8474		-48.9718	-49.9793				-52.1708	-51.6479		0.217517	0.184314
	-49.4901	-51.8501		-48.9818	-49.9746				-52.1365	-51.6444		0.210287	0.173145
	-49.4936	-51.8577		-48.9921	-49.9706				-52.1038	-51.6476		0.198189	0.159853
	-49.4965	-51.8705		-49.0028	-49.9676				-52.0773	-51.6557		0.181498	0.145186
	-49.4984	-51.8879		-49.0138	-49.9654				-52.0589	-51.6647		0.160942	0.130027
	-49.4991	-51.909		-49.0253	-49.9641				-52.0488	-51.6709		0.137631	0.115309
	-49.4985	-51.9323		-49.037	-49.9635				-52.046	-51.6728		0.112957	0.101937
	-49.4968	-51.9559		-49.0489	-49.9634				-52.0499	-51.6729		0.0884612	0.0907162
	-49.4942	-51.978		-49.0607	-49.9635				-52.0601	-51.6753		0.0657008	0.0823111
	-49.4908	-51.9966		-49.0725	-49.9635				-52.0763	-51.6822		0.0461145	0.0772125
	-49.4869	-52.01		-49.0838	-49.9631				-52.0978	-51.6911		0.0309077	0.0757335
	-49.4825	-52.0173		-49.0946	-49.962				-52.123	-51.6959		0.0209645	0.0780196
	-49.4773	-52.0179		-49.1046	-49.9598				-52.1486	-51.6915		0.0167948	0.0840733
	-49.471	-52.0122		-49.1137	-49.9565				-52.1695	-51.678		0.0185192	0.0937863
	-49.4632	-52.001		-49.1217	-49.9518				-52.1804	-51.6617		0.0258898	0.106974
	-49.4533	-51.9857		-49.1284	-49.9458				-52.1784	-51.6515		0.0383415	0.123408
	-49.441	-51.9681		-49.1338	-49.9384				-52.1655	-51.6531		0.0550659	0.142839
	-49.426	-51.9498		-49.1378	-49.9299				-52.1471	-51.6651		0.0750966	0.165019
	-49.4084	-51.9326		-49.1405	-49.9204				-52.1293	-51.6803		0.0973965	0.189695
	-49.3885	-51.9176		-49.1418	-49.9102				-52.1154	-51.6894		0.120937	0.216612
	-49.3668	-51.9058		-49.1418	-49.8996				-52.1054	-51.6868		0.144762	0.24549
	-49.3443	-51.8976		-49.1406	-49.8889				-52.0981	-51.673		0.168032	0.275996
	-49.3217	-51.8931		-49.1382	-49.8782				-52.0927	-51.654		0.190048	0.307714
	-49.2998	-51.8921		-49.1347	-49.868				-52.0903	-51.6367		0.210254	0.340113
	-49.2791	-51.8941		-49.13	-49.8582				-52.0916	-51.6256		0.22823	0.372517
	-49.2599	-51.8986		-49.1243	-49.8491				-52.0954	-51.6206		0.24367	0.404087
	-49.2422	-51.905		-49.1176	-49.8406				-52.0986	-51.6182		0.256361	0.433812
	-49.2257	-51.9125		-49.1099	-49.8327				-52.0977	-51.6154		0.266165	0.46053
	-49.2104	-51.9204		-49.1013	-49.8253				-52.0912	-51.6115		0.273003	0.482963
	-49.1962	-51.9278		-49.0918	-49.8182				-52.0804	-51.6082		0.276857	0.499775
	-49.1832	-51.9338		-49.0814	-49.8111				-52.0682	-51.606		0.277769	0.509658
	-49.1719	-51.938		-49.0704	-49.8038				-52.0573	-51.6024		0.275861	0.511429
	-49.163	-51.9396		-49.0587	-49.7961				-52.0489	-51.5932		0.271342	0.504144
	-49.1571	-51.9388		-49.0465	-49.7878				-52.0419	-51.5749		0.264529	0.487205
	-49.1552	-51.9357		-49.034	-49.7787				-52.0336	-51.5463		0.255849	0.460465
	-49.1576	-51.9309		-49.0212	-49.7686				-52.0217	-51.5081		0.245841	0.424303
	-49.1647	-51.9253		-49.0084	-49.7574				-52.006	-51.463		0.235142	0.379673
	-49.1764	-51.9199		-48.9955	-49.7451				-51.989	-51.4166		0.224461	0.328109
	-49.1921	-51.9155		-48.9827	-49.7317				-51.9755	-51.3778		0.214541	0.271689
	-49.2111	-51.9127		-48.97	-49.7174				-51.9702	-51.3551		0.206123	0.212951
	-49.2322	-51.9119		-48.9574	-49.7021				-51.9754	-51.3526		0.199895	0.154766
	-49.2539	-51.9129		-48.9449	-49.6861				-51.9898	-51.368		0.196452	0.100187
	-49.2746	-51.9155		-48.9324	-49.6694				-52.0091	-51.3943		0.196261	0.0522674
	-49.2927	-51.919		-48.92	-49.6523				-52.027	-51.4247		0.199634	0.0138799
	-49.3066	-51.9228		-48.9075	-49.6349				-52.0372	-51.455		0.206718	-0.0124572
	-49.3148	-51.9264		-48.895	-49.6174				-52.0364	-51.4839		0.217498	-0.0247324
	-49.3165	-51.9295		-48.8824	-49.5999				-52.0251	-51.5107		0.231805	-0.0215577
	-49.3111	-51.9317		-48.87	-49.5824				-52.0076	-51.5336		0.249347	-0.00224237
	-49.2983	-51.9329		-48.8577	-49.5652				-51.9899	-51.5501		0.269733	0.0331796
	-49.2787	-51.9332		-48.8458	-49.5483				-51.9768	-51.559		0.292511	0.0839708
	-49.2527	-51.9324		-48.8345	-49.5317				-51.9693	-51.5621		0.317198	0.148754
	-49.2215	-51.9306		-48.8241	-49.5154				-51.9654	-51.5634		0.343311	0.225614
	-49.186	-51.9278		-48.8147	-49.4995				-51.9619	-51.5659		0.370394	0.312223
	-49.1472	-51.9239		-48.8065	-49.484				-51.9568	-51.5682		0.398037	0.405991
	-49.1063	-51.9186		-48.7998	-49.4687				-51.9508	-51.5647		0.425895	0.504208
	-49.064	-51.912		-48.7945	-49.4536				-51.9458	-51.5498		0.453701	0.604202
	-49.0214	-51.9038		-48.7907	-49.4386				-51.9424	-51.5223		0.481275	0.703463
	-48.979	-51.8938		-48.7882	-49.4235				-51.9382	-51.4864		0.508533	0.799765
	-48.9377	-51.8823		-48.7867	-49.4083				-51.9296	-51.4494		0.535493	0.891255
	-48.8981	-51.8691		-48.786	-49.3927				-51.9143	-51.4171		0.562279	0.976514
	-48.8606	-51.8545		-48.7855	-49.3766				-51.8934	-51.3908		0.589114	1.0546
	-48.8256	-51.8389		-48.785	-49.3599				-51.8705	-51.3675		0.616307	1.12503
	-48.7933	-51.8228		-48.7838	-49.3425				-51.8502	-51.343		0.644238	1.1878
	-48.7637	-51.8067		-48.7816	-49.3243				-51.8356	-51.3156		0.673317	1.2433
	-48.7364	-51.7911		-48.778	-49.3053				-51.8269	-51.2861		0.703947	1.29225
	-48.7109	-51.7764		-48.7727	-49.2854				-51.8204	-51.255		0.736466	1.33564
	-48.6869	-51.7631		-48.7655	-49.2647				-51.8106	-51.221		0.771094	1.3746
	-48.6637	-51.7515		-48.7561	-49.2433				-51.793	-51.1822		0.807877	1.41032
	-48.6409	-51.7415		-48.7447	-49.2211				-51.7689	-51.1393		0.846643	1.44397
	-48.6183	-51.7332		-48.7313	-49.1982				-51.7449	-51.0973		0.886974	1.47656
	-48.5958	-51.7261		-48.716	-49.1746				-51.7295	-51.0643		0.928203	1.50895
	-48.5737	-51.7201		-48.6991	-49.1503				-51.7274	-51.0465		0.969441	1.54175
	-48.5526	-51.7146		-48.6807	-49.1254				-51.736	-51.0446		1.00963	1.57533
	-48.533	-51.7091		-48.6611	-49.0998				-51.7465	-51.0516		1.04765	1.60984
	-48.5159	-51.7035		-48.6406	-49.0735				-51.7474	-51.0552		1.08238	1.64526
	-48.5019	-51.6975		-48.6193	-49.0465				-51.7303	-51.0432		1.11288	1.68143
	-48.4917	-51.6911		-48.5974	-49.0188				-51.6919	-51.0079		1.13845	1.71814
	-48.4853	-51.6843		-48.575	-48.9904				-51.6349	-50.9497		1.15875	1.75522
	-48.4826	-51.677		-48.5522	-48.9612				-51.566	-50.8766		1.1739	1.79254
	-48.4828	-51.6693		-48.5291	-48.9314				-51.494	-50.8002		1.18447	1.83011
	-48.4849	-51.6609		-48.5058	-48.9011				-51.4279	-50.7308		1.19147	1.86805
	-48.4875	-51.6514		-48.4823	-48.8702				-51.3762	-50.674		1.19627	1.90657
	-48.489	-51.6401		-48.4586	-48.8388				-51.3442	-50.63		1.20052	1.94595
	-48.4881	-51.6267		-48.4349	-48.8071				-51.3332	-50.5966		1.20598	1.98642
	-48.4838	-51.6106		-48.4113	-48.775				-51.34	-50.5727		1.21435	2.02809
	-48.4755	-51.5917		-48.3877	-48.7427				-51.3588	-50.5584		1.2271	2.07091
	-48.4632	-51.5705		-48.3642	-48.7101				-51.3819	-50.552		1.24534	2.11453
	-48.4476	-51.5473		-48.341	-48.6774				-51.4008	-50.548		1.26968	2.15831
	-48.4294	-51.523		-48.3179	-48.6445				-51.4071	-50.5374		1.30019	2.20132
	-48.41	-51.4984		-48.295	-48.6115				-51.3954	-50.5114		1.33633	2.24231
	-48.3904	-51.474		-48.2723	-48.5784				-51.365	-50.4653		1.37706	2.27986
	-48.3714	-51.4503		-48.2496	-48.5453				-51.3207	-50.3999		1.42089	2.31241
	-48.3535	-51.4273		-48.2269	-48.5122				-51.2696	-50.3201		1.46601	2.33843
	-48.3365	-51.4045		-48.2041	-48.4792				-51.2185	-50.2334		1.51048	2.35652
	-48.3199	-51.3814		-48.1811	-48.4463				-51.1714	-50.1468		1.55239	2.36554
	-48.3026	-51.3574		-48.1578	-48.4135				-51.1298	-50.0657		1.59003	2.36475
	-48.2835	-51.3319		-48.1342	-48.3809				-51.0926	-49.9945		1.62206	2.35383
	-48.2615	-51.3045		-48.1104	-48.3484				-51.0568	-49.9366		1.6476	2.33297
	-48.2359	-51.275		-48.0862	-48.316				-51.0193	-49.8933		1.66634	2.30291
	-48.2061	-51.2435		-48.062	-48.2835				-50.9776	-49.8623		1.67855	2.26484
	-48.1723	-51.2103		-48.0376	-48.2509				-50.9308	-49.837		1.68505	2.22041
	-48.1349	-51.1757		-48.0133	-48.2181				-50.8798	-49.8093		1.68719	2.17161
	-48.0946	-51.1401		-47.9891	-48.1849				-50.8276	-49.7731		1.68672	2.1207
	-48.0525	-51.104		-47.9652	-48.1513				-50.779	-49.7267		1.68565	2.07006
	-48.0094	-51.0674		-47.9415	-48.1172				-50.7399	-49.6731		1.68613	2.02208
	-47.9659	-51.0304		-47.918	-48.0826				-50.7142	-49.6182		1.6903	1.97902
	-47.9226	-50.9929		-47.8948	-48.0475				-50.7018	-49.5678		1.70012	1.94293
	-47.8794	-50.9547		-47.8717	-48.012				-50.6981	-49.5251		1.71727	1.91546
	-47.8363	-50.9155		-47.8484	-47.9761				-50.6956	-49.4909		1.74304	1.89786
	-47.7929	-50.8753		-47.8249	-47.9401				-50.6875	-49.466		1.77827	1.89084
	-47.749	-50.8341		-47.8008	-47.9041				-50.6695	-49.4522		1.82328	1.89458
	-47.7045	-50.792		-47.776	-47.8681				-50.6415	-49.4511		1.87794	1.90868
	-47.6596	-50.7495		-47.7501	-47.8324				-50.6065	-49.4591		1.94162	1.93223
	-47.6146	-50.7072		-47.7229	-47.7971				-50.5681	-49.4658		2.0133	1.96386
	-47.5703	-50.6654		-47.6943	-47.7622				-50.5283	-49.4576		2.09164	2.00183
	-47.5271	-50.6245		-47.664	-47.7278				-50.486	-49.4244		2.17503	2.04416
	-47.4858	-50.5847		-47.6321	-47.694				-50.4382	-49.3644		2.2617	2.08875
	-47.4466	-50.5458		-47.5986	-47.6607				-50.3831	-49.2841		2.3498	2.13353
	-47.4096	-50.5072		-47.5634	-47.6281				-50.3217	-49.195		2.43743	2.17661
	-47.3746	-50.4683		-47.5268	-47.596				-50.2579	-49.1091		2.52278	2.21636
	-47.341	-50.4283		-47.4889	-47.5645				-50.1965	-49.0353		2.6041	2.2515
	-47.3083	-50.3866		-47.4499	-47.5335				-50.1411	-48.9771		2.67979	2.28118
	-47.2758	-50.3429		-47.41	-47.5029				-50.0922	-48.9331		2.74844	2.30498
	-47.2428	-50.2973		-47.3695	-47.4728				-50.0469	-48.8989		2.80883	2.3229
	-47.2089	-50.2505		-47.3286	-47.443				-50.0002	-48.8693		2.86001	2.33529
	-47.1739	-50.2034		-47.2876	-47.4135				-49.9469	-48.8394		2.90132	2.34285
	-47.1379	-50.1572		-47.2467	-47.3842				-49.8842	-48.8044		2.93243	2.3465
	-47.1011	-50.1131		-47.2061	-47.3549				-49.8116	-48.761		2.95334	2.3473
	-47.064	-50.072		-47.1659	-47.3255				-49.7307	-48.7088		2.96448	2.34638
	-47.0275	-50.0343		-47.1263	-47.2959				-49.6436	-48.6509		2.96666	2.34488
	-46.9922	-49.9999		-47.0875	-47.2659				-49.5542	-48.5926		2.96107	2.34384
	-46.9589	-49.968		-47.0494	-47.2354				-49.4678	-48.5382		2.94928	2.34414
	-46.9283	-49.9376		-47.0121	-47.2045				-49.3909	-48.4895		2.93316	2.34649
	-46.9008	-49.9071		-46.9756	-47.1729				-49.3286	-48.4465		2.9148	2.35132
	-46.8765	-49.8755		-46.9398	-47.1406				-49.2815	-48.4075		2.89639	2.3588
	-46.8553	-49.8416		-46.9047	-47.1077				-49.2449	-48.3701		2.88015	2.36876
	-46.8368	-49.805		-46.8699	-47.0743				-49.2113	-48.3314		2.86816	2.38072
	-46.8201	-49.7657		-46.8354	-47.0403				-49.1746	-48.2897		2.86224	2.39385
	-46.8043	-49.7242		-46.8008	-47.006				-49.1319	-48.245		2.86386	2.40701
	-46.7884	-49.681		-46.7659	-46.9713				-49.0846	-48.1988		2.87403	2.41879
	-46.7713	-49.6369		-46.7304	-46.9365				-49.0355	-48.1535		2.89327	2.42757
	-46.7518	-49.5923		-46.6942	-46.9017				-48.9872	-48.1113		2.92156	2.43161
	-46.7291	-49.5476		-46.6571	-46.8669				-48.9408	-48.0725		2.95838	2.42917
	-46.7026	-49.5024		-46.619	-46.8323				-48.8953	-48.0335		3.00278	2.41864
	-46.6718	-49.4566		-46.5799	-46.7978				-48.8479	-47.9873		3.05343	2.39863
	-46.6367	-49.4096		-46.5401	-46.7635				-48.7945	-47.927		3.10878	2.36815
	-46.5976	-49.361		-46.4998	-46.7293				-48.7323	-47.8498		3.16721	2.32667
	-46.5549	-49.3108		-46.4592	-46.6952				-48.662	-47.7593		3.22713	2.27421
	-46.5093	-49.2591		-46.4189	-46.6611				-48.587	-47.6654		3.28713	2.21137
	-46.4614	-49.2066		-46.3793	-46.6268				-48.5109	-47.581		3.34612	2.1393
	-46.412	-49.154		-46.3407	-46.5924				-48.4336	-47.5161		3.40338	2.05969
	-46.3616	-49.1024		-46.3035	-46.5577				-48.3523	-47.4735		3.45864	1.9746
	-46.3107	-49.0528		-46.2682	-46.5226				-48.2641	-47.4484		3.51208	1.88639
	-46.2598	-49.006		-46.2347	-46.4872				-48.1704	-47.4332		3.56428	1.7975
	-46.2091	-48.9626		-46.2033	-46.4513				-48.0777	-47.4217		3.61615	1.71035
	-46.1589	-48.9227		-46.1737	-46.4152				-47.9943	-47.4114		3.66884	1.62717
	-46.1095	-48.8863		-46.1458	-46.3788				-47.9249	-47.4015		3.72358	1.54986
	-46.0611	-48.853		-46.1193	-46.3424				-47.8685	-47.3915		3.78158	1.47992
	-46.0139	-48.8225		-46.0936	-46.306				-47.8193	-47.3799		3.8439	1.41842
	-45.968	-48.7941		-46.0685	-46.2699				-47.7704	-47.3661		3.91131	1.366
	-45.9232	-48.7673		-46.0433	-46.2342				-47.7172	-47.3504		3.98426	1.32291
	-45.8793	-48.7418		-46.0176	-46.1991				-47.6575	-47.333		4.0628	1.28906
	-45.8358	-48.7171		-45.9911	-46.1648				-47.5908	-47.3133		4.14663	1.26418
	-45.792	-48.6929		-45.9635	-46.1314				-47.5167	-47.2886		4.23508	1.24787
	-45.7474	-48.6691		-45.9346	-46.099				-47.4348	-47.2559		4.32726	1.23972
	-45.7012	-48.6453		-45.9045	-46.0677				-47.3444	-47.2133		4.42211	1.23932
	-45.6533	-48.6214		-45.8731	-46.0375				-47.2445	-47.1634		4.51849	1.24638
	-45.6034	-48.5971		-45.8407	-46.0084				-47.1355	-47.114		4.61534	1.26064
	-45.5521	-48.5722		-45.8075	-45.9804				-47.0195	-47.0752		4.7117	1.28187
	-45.5	-48.5462		-45.774	-45.9533				-46.9013	-47.055		4.80682	1.30984
	-45.4484	-48.519		-45.7405	-45.927				-46.7857	-47.0537		4.90013	1.34414
	-45.3984	-48.4902		-45.7074	-45.9014				-46.676	-47.0641		4.99125	1.38419
	-45.3514	-48.4597		-45.6749	-45.8763				-46.5729	-47.0742		5.07994	1.42909
	-45.3085	-48.4276		-45.6435	-45.8516				-46.475	-47.074		5.16601	1.47764
	-45.2704	-48.394		-45.6132	-45.8271				-46.381	-47.0594		5.24927	1.52823
	-45.2374	-48.3594		-45.5843	-45.8026				-46.2895	-47.0323		5.3294	1.57894
	-45.2095	-48.3242		-45.5566	-45.778				-46.1989	-46.9977		5.40593	1.62757
	-45.186	-48.289		-45.5302	-45.7531				-46.1066	-46.9586		5.47816	1.67175
	-45.166	-48.2542		-45.5049	-45.7278				-46.0097	-46.9152		5.54517	1.70907
	-45.1485	-48.2198		-45.4803	-45.702				-45.9055	-46.8653		5.60584	1.7372
	-45.1324	-48.1857		-45.4562	-45.6758				-45.7928	-46.8073		5.65893	1.7541
	-45.1165	-48.1514		-45.4323	-45.6491				-45.6719	-46.7418		5.70316	1.75813
	-45.1003	-48.1163		-45.4082	-45.6219				-45.5436	-46.6726		5.7373	1.74819
	-45.083	-48.0796		-45.3837	-45.5944				-45.4085	-46.6057		5.76035	1.72377
	-45.0645	-48.0405		-45.3585	-45.5667				-45.2678	-46.5474		5.77161	1.68506
	-45.0446	-47.9986		-45.3325	-45.5388				-45.1229	-46.5025		5.77075	1.6329
	-45.0231	-47.9538		-45.3056	-45.511				-44.9769	-46.4712		5.75791	1.56878
	-45	-47.9062		-45.2778	-45.4832				-44.8335	-46.4489		5.73368	1.49475
	-44.9752	-47.8564		-45.2492	-45.4556				-44.697	-46.4277		5.6991	1.41328
	-44.9483	-47.8053		-45.22	-45.4284				-44.5708	-46.4006		5.65557	1.32715
	-44.9191	-47.7536		-45.1904	-45.4014				-44.4569	-46.3655		5.60474	1.23928
	-44.8872	-47.7021		-45.1606	-45.3747				-44.3545	-46.3267		5.54843	1.15256
	-44.8525	-47.6513		-45.1309	-45.3484				-44.2609	-46.2935		5.48842	1.06971
	-44.8147	-47.6016		-45.1014	-45.3223				-44.1728	-46.2745		5.42639	0.993077
	-44.7741	-47.553		-45.0724	-45.2965				-44.0871	-46.2734		5.36374	0.924585
	-44.731	-47.5053		-45.044	-45.271				-44.0002	-46.2872		5.30152	0.865584
	-44.6856	-47.4584		-45.0163	-45.2458				-43.908	-46.3085		5.24032	0.816815
	-44.6385	-47.4122		-44.9894	-45.2208				-43.8073	-46.3287		5.1803	0.778383
	-44.5903	-47.367		-44.9632	-45.1963				-43.6983	-46.3412		5.12109	0.749782
	-44.5417	-47.3231		-44.9377	-45.1721				-43.5855	-46.3414		5.06192	0.729943
	-44.4934	-47.2811		-44.9128	-45.1486				-43.4747	-46.3273		5.00159	0.717336
	-44.4465	-47.2416		-44.8887	-45.1256				-43.3699	-46.3005		4.93859	0.710082
	-44.4019	-47.2053		-44.8651	-45.1033				-43.2712	-46.2674		4.87117	0.706096
	-44.3607	-47.1724		-44.842	-45.0817				-43.1761	-46.2371		4.79744	0.703235
	-44.3241	-47.1428		-44.8194	-45.0607				-43.0818	-46.2166		4.71545	0.69945
	-44.2928	-47.1161		-44.7972	-45.0402				-42.9863	-46.2056		4.62334	0.692927
	-44.2673	-47.0915		-44.7754	-45.0201				-42.8878	-46.1962		4.51934	0.682207
	-44.2476	-47.0678		-44.7538	-45.0001				-42.785	-46.1782		4.40192	0.666283
	-44.2331	-47.044		-44.7324	-44.9798				-42.6793	-46.1477		4.26986	0.644656
	-44.2225	-47.0193		-44.7111	-44.959				-42.5743	-46.1099		4.12227	0.61736
	-44.2143	-46.9929		-44.6898	-44.9374				-42.475	-46.0758		3.95866	0.584941
	-44.2067	-46.9648		-44.6685	-44.9147				-42.3843	-46.0537		3.779	0.548397
	-44.1977	-46.935		-44.647	-44.8905				-42.3011	-46.0443		3.58372	0.509086
	-44.1858	-46.9042		-44.6255	-44.8648				-42.2218	-46.0406		3.37371	0.468601
	-44.17	-46.873		-44.6039	-44.8375				-42.1434	-46.0351		3.15035	0.42863
	-44.1496	-46.8424		-44.5822	-44.8086				-42.066	-46.0245		2.91544	0.390804
	-44.1246	-46.8129		-44.5605	-44.7781				-41.9931	-46.0123		2.67118	0.356554
	-44.0956	-46.785		-44.5389	-44.7464				-41.9299	-46.0063		2.42012	0.326984
	-44.0635	-46.7589		-44.5174	-44.7136				-41.8798	-46.0132		2.16505	0.302776
	-44.0294	-46.7345		-44.496	-44.6801				-41.8427	-46.0348		1.9089	0.284134
	-43.9943	-46.7114		-44.4749	-44.6463				-41.8152	-46.0662		1.65468	0.270771
	-43.9593	-46.689		-44.4539	-44.6126				-41.7929	-46.0977		1.40531	0.261946
	-43.9251	-46.6664		-44.4331	-44.5792				-41.7742	-46.119		1.16352	0.256547
	-43.8924	-46.6429		-44.4123	-44.5466				-41.7608	-46.1239		0.931752	0.253211
	-43.8614	-46.6175		-44.3916	-44.515				-41.756	-46.1118		0.712031	0.250459
	-43.8323	-46.5899		-44.3706	-44.4846				-41.7618	-46.0865		0.505884	0.246856
	-43.8048	-46.5596		-44.3493	-44.4556				-41.777	-46.0531		0.314273	0.241148
	-43.7785	-46.5268		-44.3277	-44.428				-41.7977	-46.0156		0.137561	0.232389
	-43.7529	-46.4919		-44.3056	-44.4017				-41.8196	-45.9781		-0.024503	0.220021
	-43.7273	-46.4559		-44.2829	-44.3768				-41.8397	-45.9455		-0.172753	0.203921
	-43.701	-46.4198		-44.2596	-44.3529				-41.8571	-45.9228		-0.308546	0.184384
	-43.6735	-46.3847		-44.2358	-44.33				-41.8726	-45.9125		-0.433672	0.162075
	-43.6442	-46.3517		-44.2114	-44.3076				-41.8881	-45.9127		-0.550233	0.137935
	-43.6128	-46.3216		-44.1866	-44.2855				-41.9047	-45.9192		-0.660499	0.113057
	-43.5794	-46.2947		-44.1615	-44.2634				-41.9219	-45.9294		-0.766761	0.0885614
	-43.5443	-46.2709		-44.136	-44.241				-41.9373	-45.9455		-0.871165	0.0654664
	-43.5078	-46.2496		-44.1104	-44.218				-41.9483	-45.9711		-0.975569	0.0445851
	-43.4706	-46.2301		-44.0848	-44.1943				-41.9541	-46.0058		-1.08141	0.0264491
	-43.4336	-46.2115		-44.0592	-44.1697				-41.9574	-46.0413		-1.18959	0.0112705
	-43.3974	-46.1929		-44.0339	-44.1443				-41.9625	-46.0647		-1.30044	-0.00105566
	-43.3629	-46.1738		-44.0089	-44.118				-41.9733	-46.0661		-1.41366	-0.0109142
	-43.3307	-46.1537		-43.9844	-44.0911				-41.9914	-46.045		-1.52834	-0.0189037
	-43.3013	-46.1328		-43.9605	-44.0638				-42.0158	-46.0104		-1.64308	-0.0257521
	-43.275	-46.1113		-43.9375	-44.0363				-42.0452	-45.9752		-1.75602	-0.0322254
	-43.252	-46.0894		-43.9154	-44.0089				-42.0785	-45.9495		-1.86504	-0.0390408
	-43.2321	-46.0675		-43.8945	-43.9819				-42.1167	-45.9377		-1.96788	-0.046792
	-43.2149	-46.0458		-43.875	-43.9555				-42.1625	-45.9391		-2.06232	-0.0558952
	-43.1999	-46.0244		-43.857	-43.93				-42.2194	-45.9501		-2.14636	-0.0665567
	-43.1862	-46.0032		-43.8406	-43.9054				-42.2891	-45.9667		-2.21833	-0.0787639
	-43.1732	-45.9821		-43.826	-43.8818				-42.3695	-45.9852		-2.27701	-0.0922965
	-43.1601	-45.9606		-43.8133	-43.8593				-42.454	-46.0025		-2.3217	-0.106754
	-43.1463	-45.9386		-43.8024	-43.8377				-42.5343	-46.0156		-2.35229	-0.121596
	-43.1314	-45.9157		-43.7934	-43.8171				-42.6047	-46.0216		-2.36915	-0.13619
	-43.1153	-45.8918		-43.7862	-43.7973				-42.6641	-46.0186		-2.37317	-0.149861
	-43.0982	-45.8669		-43.7806	-43.7783				-42.7152	-46.0075		-2.36559	-0.16194
	-43.0803	-45.8411		-43.7765	-43.76				-42.7607	-45.9928		-2.34797	-0.171817
	-43.0619	-45.815		-43.7735	-43.7423				-42.8005	-45.9809		-2.32199	-0.178979
	-43.0435	-45.7889		-43.7713	-43.7252				-42.8327	-45.9767		-2.28938	-0.183047
	-43.0253	-45.7633		-43.7697	-43.7089				-42.8571	-45.9823		-2.25182	-0.183806
	-43.0075	-45.7387		-43.7682	-43.6933				-42.8786	-45.9975		-2.21082	-0.181221
	-42.9903	-45.7154		-43.7665	-43.6788				-42.9056	-46.0216		-2.16771	-0.175441
	-42.9735	-45.6935		-43.7643	-43.6653				-42.9457	-46.0516		-2.12357	-0.166797
	-42.957	-45.6728		-43.7613	-43.653				-43.0001	-46.082		-2.07927	-0.155775
	-42.9404	-45.6531		-43.7573	-43.6421				-43.0631	-46.105		-2.03546	-0.142992
	-42.9233	-45.6339		-43.7523	-43.6327				-43.1249	-46.1143		-1.99259	-0.129147
	-42.9056	-45.6149		-43.7461	-43.6246				-43.1772	-46.108		-1.95099	-0.114977
	-42.887	-45.5959		-43.7388	-43.618				-43.2162	-46.0892		-1.91087	-0.101208
	-42.8674	-45.5767		-43.7306	-43.6125				-43.2439	-46.0641		-1.87238	-0.088508
	-42.8471	-45.5576		-43.7215	-43.6082				-43.2663	-46.0393		-1.8356	-0.0774504
	-42.8265	-45.5389		-43.7119	-43.6046				-43.2905	-46.0203		-1.80059	-0.0684863
	-42.8063	-45.521		-43.702	-43.6015				-43.3212	-46.0112		-1.76736	-0.0619334
	-42.7869	-45.5044		-43.692	-43.5986				-43.358	-46.0136		-1.73588	-0.0579772
	-42.7692	-45.4893		-43.682	-43.5956				-43.3965	-46.0262		-1.70605	-0.0566841
	-42.7534	-45.4761		-43.6722	-43.5922				-43.4315	-46.0445		-1.67774	-0.0580245
	-42.7398	-45.4649		-43.6626	-43.5883				-43.4614	-46.0633		-1.65068	-0.0618992
	-42.7283	-45.4556		-43.6532	-43.5837				-43.488	-46.0781		-1.62458	-0.0681663
	-42.7183	-45.4481		-43.644	-43.5783				-43.515	-46.0861		-1.59903	-0.0766638
	-42.7092	-45.4422		-43.6348	-43.5721				-43.545	-46.0859		-1.57359	-0.0872244
	-42.7001	-45.4377		-43.6255	-43.5652				-43.578	-46.0774		-1.54779	-0.0996814
	-42.6902	-45.4342		-43.6158	-43.5577				-43.6125	-46.0628		-1.52117	-0.113866
	-42.6787	-45.4315		-43.6056	-43.5496				-43.6466	-46.0472		-1.4933	-0.129594
	-42.6651	-45.4293		-43.5949	-43.5411				-43.6786	-46.0375		-1.46385	-0.146652
	-42.6489	-45.4272		-43.5835	-43.5324				-43.7076	-46.0388		-1.43261	-0.164779
	-42.6299	-45.425		-43.5715	-43.5235				-43.7342	-46.0507		-1.3995	-0.183646
	-42.6081	-45.4225		-43.5589	-43.5144				-43.7615	-46.0673		-1.36462	-0.202845
	-42.5837	-45.4194		-43.5459	-43.5052				-43.7932	-46.0809		-1.32819	-0.221886
	-42.5568	-45.4159		-43.5327	-43.4958				-43.8315	-46.0865		-1.29059	-0.240196
	-42.5276	-45.4119		-43.5196	-43.4861				-43.8733	-46.0848		-1.25227	-0.257136
	-42.4963	-45.4076		-43.5068	-43.4761				-43.9119	-46.0804		-1.21374	-0.27202
	-42.4633	-45.4032		-43.4946	-43.4655				-43.9406	-46.0794		-1.17549	-0.284147
	-42.4288	-45.3988		-43.4833	-43.4542				-43.9577	-46.0861		-1.13794	-0.292839
	-42.3934	-45.3945		-43.4732	-43.4421				-43.9665	-46.1014		-1.10137	-0.297486
	-42.3576	-45.3903		-43.4645	-43.4292				-43.972	-46.1221		-1.06588	-0.297583
	-42.322	-45.3859		-43.4572	-43.4153				-43.9775	-46.1423		-1.03141	-0.29278
	-42.2872	-45.3814		-43.4515	-43.4005				-43.9838	-46.1559		-0.997657	-0.282916
	-42.2538	-45.3764		-43.4475	-43.3849				-43.9911	-46.1598		-0.964158	-0.268046
	-42.222	-45.3706		-43.4449	-43.3685				-44.0007	-46.1567		-0.930306	-0.248458
	-42.1923	-45.364		-43.4439	-43.3516				-44.0149	-46.1534		-0.895418	-0.224675
	-42.1649	-45.3562		-43.444	-43.3345				-44.0361	-46.1574		-0.858803	-0.197432
	-42.1397	-45.3472		-43.4452	-43.3172				-44.0657	-46.1731		-0.819842	-0.167646
	-42.117	-45.337		-43.4472	-43.3001				-44.1027	-46.1994		-0.778056	-0.13636
	-42.0967	-45.3256		-43.4498	-43.2834				-44.1433	-46.2297		-0.733167	-0.104681
	-42.0789	-45.3131		-43.4526	-43.2671				-44.1814	-46.2534		-0.685128	-0.0737015
	-42.0633	-45.2997		-43.4556	-43.2515				-44.2104	-46.2595		-0.634148	-0.0444278
	-42.0499	-45.2858		-43.4586	-43.2366				-44.2271	-46.2421		-0.58067	-0.0177082
	-42.0381	-45.2717		-43.4613	-43.2225				-44.2328	-46.2045		-0.525346	0.00582362
	-42.0275	-45.2579		-43.4638	-43.2092				-44.2326	-46.1588		-0.468986	0.0257862
	-42.0173	-45.2449		-43.466	-43.1967				-44.2322	-46.1208		-0.412494	0.0420635
	-42.0068	-45.233		-43.468	-43.185				-44.2333	-46.1012		-0.35681	0.054793
	-41.995	-45.2226		-43.4697	-43.1741				-44.2333	-46.1023		-0.302849	0.0643273
	-41.9814	-45.2137		-43.4713	-43.1639				-44.2282	-46.1189		-0.251452	0.0711754
	-41.9656	-45.2062		-43.4729	-43.1545				-44.2171	-46.143		-0.203356	0.075929
	-41.9472	-45.1998		-43.4744	-43.146				-44.204	-46.1666		-0.159175	0.0791817
	-41.9263	-45.1939		-43.4761	-43.1383				-44.1954	-46.1831		-0.119391	0.0814521
	-41.9033	-45.1877		-43.478	-43.1314				-44.1962	-46.1878		-0.08437	0.0831176
	-41.8786	-45.1806		-43.4801	-43.1255				-44.207	-46.1799		-0.0543655	0.0843694
	-41.8528	-45.1718		-43.4824	-43.1204				-44.2242	-46.1646		-0.029537	0.085192
	-41.8263	-45.1608		-43.485	-43.1161				-44.2422	-46.151		-0.00995953	0.0853712
	-41.7997	-45.1474		-43.4879	-43.1125				-44.255	-46.147		0.00437174	0.0845297
	-41.7731	-45.1316		-43.491	-43.1095				-44.2585	-46.1542		0.0135425	0.0821861
	-41.7468	-45.1137		-43.4944	-43.1069				-44.2515	-46.1672		0.0177266	0.077831
	-41.7207	-45.094		-43.4979	-43.1046				-44.2347	-46.1777		0.0171948	0.0710112
	-41.6948	-45.0734		-43.5017	-43.1023				-44.2106	-46.1788		0.0123242	0.0614125
	-41.6691	-45.0524		-43.5056	-43.0999				-44.1833	-46.1675		0.0036008	0.0489303
	-41.6434	-45.0319		-43.5095	-43.0972				-44.159	-46.1449		-0.00838368	0.0337204
	-41.6178	-45.0126		-43.5135	-43.0939				-44.1449	-46.1158		-0.0229458	0.016222
	-41.5925	-44.9953		-43.5173	-43.0901				-44.1461	-46.0877		-0.0393329	-0.00284874
	-41.5676	-44.9805		-43.521	-43.0855				-44.162	-46.0693		-0.0567538	-0.0225382
	-41.5435	-44.969		-43.5244	-43.0802				-44.1861	-46.0662		-0.0744129	-0.0417217
	-41.5207	-44.961		-43.5274	-43.0742				-44.2099	-46.0781		-0.0915461	-0.059193
	-41.4998	-44.9567		-43.5298	-43.0674				-44.2272	-46.099		-0.107452	-0.0737671
	-41.4812	-44.9558		-43.5315	-43.06				-44.2364	-46.1219		-0.121515	-0.0843864
	-41.4653	-44.9579		-43.5324	-43.0521				-44.2395	-46.1427		-0.133228	-0.0902204
	-41.4523	-44.9624		-43.5324	-43.0438				-44.2396	-46.1608		-0.14219	-0.0907472
	-41.4422	-44.9683		-43.5313	-43.0353				-44.2388	-46.1772		-0.148115	-0.0858105
	-41.4345	-44.9749		-43.5292	-43.0268				-44.2379	-46.1922		-0.150818	-0.0756444
	-41.4282	-44.9814		-43.5259	-43.0185				-44.2361	-46.2043		-0.150213	-0.0608643
	-41.4224	-44.9874		-43.5216	-43.0105				-44.233	-46.2115		-0.146297	-0.0424246
	-41.4155	-44.9926		-43.5162	-43.0032				-44.2293	-46.2125		-0.139146	-0.0215461
	-41.4062	-44.9972		-43.51	-42.9965				-44.227	-46.2079		-0.128911	0.000379236
	-41.3934	-45.0017		-43.5031	-42.9906				-44.229	-46.1988		-0.115811	0.0218992
	-41.3762	-45.0067		-43.4957	-42.9857				-44.2376	-46.1866		-0.100135	0.0416158
	-41.3544	-45.0127		-43.4882	-42.9818				-44.2532	-46.1731		-0.0822377	0.0582956
	-41.3286	-45.0205		-43.4808	-42.9788				-44.2736	-46.1602		-0.0625285	0.070965
	-41.2999	-45.0305		-43.4739	-42.9767				-44.2937	-46.1498		-0.0414636	0.0789826
	-41.2696	-45.0429		-43.4678	-42.9755				-44.307	-46.1429		-0.0195253	0.0820836
	-41.2394	-45.0575		-43.4629	-42.975				-44.3086	-46.1383		0.00279968	0.0803921
	-41.2109	-45.0739		-43.4593	-42.9751				-44.2984	-46.1331		0.0250453	0.0744013
	-41.1852	-45.0915		-43.4574	-42.9756				-44.2807	-46.1245		0.0467885	0.064924
	-41.1629	-45.1094		-43.4572	-42.9764				-44.2619	-46.1123		0.0676654	0.0530171
	-41.1443	-45.1267		-43.4588	-42.9773				-44.2465	-46.0989		0.0873778	0.0398897
	-41.129	-45.1425		-43.4622	-42.9782				-44.2366	-46.0889		0.105687	0.0267998
	-41.1164	-45.1562		-43.4671	-42.979				-44.2314	-46.0868		0.122394	0.0149515
	-41.1059	-45.167		-43.4733	-42.9798				-44.2288	-46.0956		0.137307	0.00540024
	-41.0968	-45.1744		-43.4805	-42.9805				-44.2269	-46.1155		0.150206	-0.00102656
	-41.0886	-45.178		-43.4883	-42.9812				-44.2254	-46.1439		0.160802	-0.00378592
	-41.0808	-45.1774		-43.4964	-42.982				-44.2258	-46.175		0.168706	-0.00265012
	-41.073	-45.1725		-43.5043	-42.9831				-44.2298	-46.2012		0.173416	0.00229004
	-41.065	-45.1631		-43.5116	-42.9845				-44.237	-46.2149		0.174325	0.0106484
	-41.0563	-45.1495		-43.518	-42.9865				-44.2439	-46.2119		0.170755	0.0217895
	-41.0464	-45.1322		-43.5232	-42.9891				-44.247	-46.1929		0.162027	0.0348931
	-41.0348	-45.112		-43.5271	-42.9923				-44.2455	-46.164		0.147542	0.0490305
	-41.0209	-45.0898		-43.5294	-42.9963				-44.2415	-46.1342		0.126898	0.063246
	-41.0043	-45.0669		-43.5301	-43.0008				-44.2361	-46.1127		0.0999937	0.0766385
	-40.9848	-45.0446		-43.5293	-43.0059				-44.2265	-46.1055		0.0671344	0.0884352
	-40.9624	-45.024		-43.5271	-43.0114				-44.2077	-46.1139		0.0291106	0.0980543
	-40.9373	-45.006		-43.5235	-43.0171				-44.1775	-46.1331		-0.0127649	0.105152
	-40.9102	-44.9915		-43.5188	-43.0229				-44.1407	-46.1538		-0.056668	0.109651
	-40.8816	-44.9807		-43.5131	-43.0285				-44.1071	-46.1654		-0.100331	0.111747
	-40.8526	-44.9736		-43.5068	-43.0339				-44.0858	-46.1612		-0.141167	0.111899
	-40.8239	-44.9701		-43.4999	-43.0388				-44.0813	-46.1408		-0.176441	0.11079
	-40.7965	-44.9696		-43.4927	-43.0432				-44.094	-46.1105		-0.203473	0.109276
	-40.7712	-44.9716		-43.4853	-43.047				-44.1222	-46.0805		-0.219865	0.108311
	-40.7486	-44.9755		-43.4781	-43.0501				-44.1637	-46.0605		-0.22371	0.108869
	-40.7294	-44.981		-43.471	-43.0525				-44.2151	-46.0561		-0.21378	0.111845
	-40.7141	-44.9877		-43.4643	-43.0544				-44.2718	-46.0667		-0.189655	0.11797
	-40.7026	-44.9954		-43.458	-43.0557				-44.3279	-46.0868		-0.151802	0.127727
	-40.6951	-45.0041		-43.4523	-43.0565				-44.3773	-46.1092		-0.10156	0.141284
	-40.691	-45.0136		-43.4472	-43.0569				-44.4131	-46.1291		-0.0410695	0.158455
	-40.6896	-45.0237		-43.4427	-43.0569				-44.4292	-46.1452		0.026874	0.17869
	-40.6897	-45.034		-43.4388	-43.0566				-44.4213	-46.158		0.0990179	0.2011
	-40.69	-45.0438		-43.4354	-43.056				-44.3891	-46.1667		0.17188	0.224513
	-40.6889	-45.0522		-43.4324	-43.0553				-44.3386	-46.1683		0.241987	0.247569
	-40.6852	-45.0584		-43.4299	-43.0543				-44.2802	-46.1591		0.306103	0.268826
	-40.6775	-45.0613		-43.4274	-43.0531				-44.2258	-46.1388		0.361427	0.286889
	-40.6651	-45.0607		-43.425	-43.0518				-44.1837	-46.1107		0.40574	0.300533
	-40.6476	-45.0561		-43.4223	-43.0503				-44.1567	-46.0806		0.43751	0.308815
	-40.6252	-45.048		-43.4192	-43.0488				-44.1432	-46.0532		0.455929	0.311165
	-40.5985	-45.037		-43.4155	-43.0472				-44.1395	-46.0294		0.460909	0.307435
	-40.5684	-45.0239		-43.411	-43.0457				-44.1414	-46.0066		0.453024	0.297911
	-40.5362	-45.0097		-43.4055	-43.0444				-44.145	-45.983		0.43343	0.283292
	-40.5034	-44.9953		-43.3991	-43.0433				-44.1465	-45.9607		0.403749	0.264622
	-40.4714	-44.9811		-43.3917	-43.0426				-44.1424	-45.9465		0.365958	0.243194
	-40.4416	-44.9677		-43.3833	-43.0424				-44.1309	-45.9473		0.322257	0.220446
	-40.4154	-44.955		-43.3741	-43.0427				-44.1131	-45.9648		0.274957	0.197832
	-40.3934	-44.9428		-43.3643	-43.0435				-44.0927	-45.993		0.226362	0.176722
	-40.3762	-44.9309		-43.3542	-43.0449				-44.0742	-46.0216		0.178668	0.158302
	-40.3639	-44.9189		-43.3441	-43.0467				-44.061	-46.0415		0.133874	0.143506
	-40.3557	-44.9066		-43.3343	-43.0489				-44.0547	-46.0489		0.0937049	0.132986
	-40.3509	-44.894		-43.3252	-43.0514				-44.0565	-46.0462		0.0595538	0.127101
	-40.3479	-44.881		-43.3172	-43.0541				-44.0675	-46.0386		0.032443	0.125953
	-40.3453	-44.8678		-43.3104	-43.0569				-44.0885	-46.0296		0.0130174	0.129434
	-40.3417	-44.8546		-43.3051	-43.0596				-44.1176	-46.0197		0.00156964	0.137314
	-40.3359	-44.8417		-43.3015	-43.0621				-44.1502	-46.0074		-0.00189201	0.149332
	-40.3273	-44.8294		-43.2995	-43.0644				-44.1805	-45.9931		0.00247005	0.165319
	-40.3158	-44.8182		-43.2992	-43.0662				-44.2029	-45.9795		0.0144864	0.185328
	-40.3016	-44.8082		-43.3004	-43.0674				-44.2136	-45.9713		0.0341933	0.209791
	-40.2856	-44.7998		-43.3029	-43.0679				-44.2102	-45.9713		0.0620892	0.23969
	-40.2689	-44.793		-43.3063	-43.0674				-44.1931	-45.9782		0.099425	0.276751
	-40.2524	-44.7879		-43.3103	-43.0657				-44.1651	-45.9878		0.148509	0.32366
	-40.2368	-44.7844		-43.3143	-43.0626				-44.1315	-45.9949		0.213007	0.384274
	-40.2227	-44.7821		-43.318	-43.0578				-44.0977	-45.997		0.29819	0.463814
	-40.2101	-44.7805		-43.3206	-43.0509				-44.069	-45.9944		0.411113	0.569006
	-40.1988	-44.7789		-43.3212	-43.0415				-44.0502	-45.9885		0.560642	0.708106
	-40.1884	-44.7766		-43.3191	-43.0289				-44.046	-45.979		0.757301	0.890763
	-40.1782	-44.7728		-43.3129	-43.0124				-44.0588	-45.9641		1.01286	1.12765
	-40.1677	-44.7669		-43.3011	-42.9909				-44.0866	-45.9419		1.33961	1.42977
	-40.1565	-44.7584		-43.2818	-42.963				-44.1214	-45.9129		1.74934	1.80748
	-40.1442	-44.7472		-43.2527	-42.9269				-44.1514	-45.882		2.25186	2.26908
	-40.1303	-44.7334		-43.2109	-42.8804				-44.1662	-45.8573		2.85329	2.81909
	-40.114	-44.7172		-43.1531	-42.8209				-44.1604	-45.8464		3.55407	3.45633
	-40.0933	-44.6983		-43.0761	-42.7457				-44.1365	-45.8529		4.34681	4.17185
	-40.0649	-44.6761		-42.9763	-42.6521				-44.1035	-45.8735		5.21432	4.94698
	-40.0226	-44.6487		-42.851	-42.5381				-44.0733	-45.9		6.12792	5.75186
	-39.9566	-44.6123		-42.6983	-42.4026				-44.0551	-45.9227		7.04649	6.5446
	-39.8528	-44.5608		-42.5183	-42.2463				-44.0513	-45.9352		7.91641	7.2715
	-39.6921	-44.4853		-42.314	-42.0726				-44.0577	-45.935		8.67284	7.86862
	-39.4512	-44.3745		-42.0915	-41.8881				-44.0665	-45.9232		9.24239	8.26473
	-39.1045	-44.2155		-41.8616	-41.7035				-44.0706	-45.9019		9.54733	8.38584
	-38.6279	-43.9954		-41.6398	-41.5339				-44.0647	-45.8723		9.51124	8.16112
	-38.0048	-43.7041		-41.4466	-41.3987				-44.0378	-45.8269		9.06585	7.52978
	-37.2326	-43.3381		-41.3067	-41.3211				-43.9511	-45.7302		8.15841	6.44849
	-36.3307	-42.9037		-41.2482	-41.327				-43.702	-45.4869		6.75917	4.89855
	-35.346	-42.421		-41.3009	-41.4429				-43.1046	-44.921		4.86795	2.89201
	-34.3564	-41.9256		-41.4933	-41.6939				-41.9435	-43.8198		2.51912	0.475891
	-33.4683	-41.4682		-41.8498	-42.1002				-40.1259	-42.0735		-0.215877	-2.26623
	-32.809	-41.1113		-42.3875	-42.6746				-37.8549	-39.8501		-3.22916	-5.21589
	-32.5127	-40.9225		-43.113	-43.4195				-35.657	-37.6545		-6.38038	-8.22493
	-32.7021	-40.9652		-44.0196	-44.3243				-34.1729	-36.1609		-9.50422	-11.124
	-33.4683	-41.2883		-45.0856	-45.3644				-33.83	-35.8881		-12.421	-13.7343
	-34.8516	-41.916		-46.274	-46.501				-34.644	-36.9407		-14.9496	-15.8807
	-36.828	-42.8401		-47.5331	-47.6823				-36.3019	-39.011		-16.9218	-17.4069
	-39.3026	-44.0168		-48.7997	-48.8465				-38.4441	-41.6332		-18.1965	-18.1887
	-42.1139	-45.368		-50.003	-49.926				-40.9142	-44.4882		-18.6725	-18.1464
	-45.0466	-46.7883		-51.0697	-50.8524				-43.7786	-47.5172		-18.2982	-17.2533
	-47.8544	-48.1567		-51.9304	-51.5625				-47.098	-50.7566		-17.078	-15.5404
	-50.2877	-49.3509		-52.5254	-52.0039				-50.6377	-54.0409		-15.0737	-13.0954
	-52.1235	-50.2621		-52.8106	-52.1399				-53.7837	-56.8558		-12.4006	-10.0574
	-53.1937	-50.8095		-52.7613	-51.9531				-55.7884	-58.5131		-9.21909	-6.60681
	-53.4059	-50.9494		-52.375	-51.4478				-56.1792	-58.5339		-5.72279	-2.95085
	-52.7551	-50.6808		-51.6721	-50.6497				-55.0126	-56.94		-2.12288	0.692239
	-51.3231	-50.0443		-50.694	-49.6036				-52.7882	-54.2341		1.36825	4.11057
	-49.2672	-49.1155		-49.4997	-48.3703				-50.1253	-51.1072		4.55337	7.11477
	-46.7981	-47.9944		-48.1606	-47.021				-47.4597	-48.1056		7.26495	9.55181
	-44.1523	-46.7921		-46.7546	-45.6312				-44.9544	-45.4758		9.37662	11.3152
	-41.5636	-45.6168		-45.3592	-44.2751				-42.6321	-43.2482		10.8106	12.3506
	-39.2354	-44.5617		-44.0459	-43.0191				-40.5766	-41.441		11.5405	12.6569
	-37.3216	-43.6957		-42.8749	-41.9181				-39.0193	-40.1901		11.5897	12.2822
	-35.9145	-43.0592		-41.8912	-41.0115				-38.2344	-39.696		11.0253	11.3164
	-35.0428	-42.6629		-41.1229	-40.322				-38.3432	-40.0514		9.94965	9.8805
	-34.6777	-42.4913		-40.5808	-39.8558				-39.2037	-41.1167		8.48832	8.11431
	-34.7459	-42.5096		-40.2596	-39.6039				-40.473	-42.5523		6.77869	6.16372
	-35.1456	-42.6704		-40.1407	-39.5449				-41.7771	-43.9735		4.95785	4.16893
	-35.7642	-42.9227		-40.1951	-39.6483				-42.8562	-45.1069		3.15231	2.25447
	-36.4935	-43.2185		-40.3878	-39.8785				-43.6108	-45.8527		1.46972	0.521827
	-37.2412	-43.518		-40.6812	-40.1982				-44.0647	-46.2513		-0.00662276	-0.955018
	-37.9383	-43.7921		-41.0383	-40.5715				-44.2977	-46.4055		-1.22056	-2.13104
	-38.5409	-44.0236		-41.4256	-40.9661				-44.3929	-46.4168		-2.14305	-2.98897
	-39.0287	-44.2058		-41.815	-41.3557				-44.4123	-46.3575		-2.76998	-3.53595
	-39.3999	-44.3398		-42.1844	-41.7199				-44.3939	-46.2719		-3.11815	-3.79865
	-39.6658	-44.4319		-42.5183	-42.045				-44.3574	-46.1871		-3.22026	-3.81763
	-39.8445	-44.4908		-42.8074	-42.3229				-44.3116	-46.1195		-3.11945	-3.64154
	-39.9563	-44.5256		-43.0475	-42.5509				-44.26	-46.0758		-2.86395	-3.32183
	-40.02	-44.544		-43.2389	-42.73				-44.2049	-46.0531		-2.50246	-2.90823
	-40.051	-44.5519		-43.3847	-42.8641				-44.149	-46.0414		-2.08029	-2.44545
	-40.0609	-44.5534		-43.4903	-42.9589				-44.096	-46.0314		-1.6367	-1.97091
	-40.0573	-44.5509		-43.5619	-43.0207				-44.0487	-46.0186		-1.2033	-1.51377
	-40.0451	-44.5459		-43.606	-43.0562				-44.0088	-46.0046		-0.803397	-1.09479
	-40.0269	-44.5392		-43.6291	-43.0715				-43.9764	-45.9929		-0.452251	-0.727018
	-40.0042	-44.5314		-43.6366	-43.0719				-43.9505	-45.9857		-0.157866	-0.416923
	-39.9779	-44.5234		-43.6335	-43.062				-43.9289	-45.9835		0.0777884	-0.165794
	-39.9488	-44.516		-43.6236	-43.0454				-43.9095	-45.9855		0.257382	0.0288273
	-39.9178	-44.5101		-43.6101	-43.025				-43.8919	-45.9897		0.386816	0.171819
	-39.886	-44.5067		-43.595	-43.0028				-43.8768	-45.9915		0.473926	0.269376
	-39.8548	-44.5064		-43.5801	-42.9802				-43.866	-45.9847		0.527376	0.328162
	-39.8254	-44.5094		-43.5663	-42.9584				-43.8602	-45.9645		0.555779	0.354734
	-39.799	-44.5157		-43.554	-42.9378				-43.8577	-45.9307		0.567069	0.355203
	-39.7765	-44.5248		-43.5435	-42.919				-43.8556	-45.888		0.568072	0.335085
	-39.7584	-44.536		-43.5347	-42.902				-43.8519	-45.8443		0.564289	0.299277
	-39.7446	-44.5481		-43.5273	-42.8869				-43.8472	-45.8075		0.559815	0.25212
	-39.7344	-44.5603		-43.521	-42.8737				-43.8445	-45.7836		0.557382	0.197486
	-39.7269	-44.5714		-43.5155	-42.8624				-43.8458	-45.7759		0.558482	0.138854
	-39.7208	-44.5806		-43.5103	-42.8527				-43.8506	-45.7842		0.563546	0.0793721
	-39.7147	-44.5872		-43.5051	-42.8447				-43.8562	-45.8049		0.572153	0.021872
	-39.7075	-44.5908		-43.4996	-42.8382				-43.8595	-45.8324		0.583258	-0.0311395
	-39.6983	-44.5912		-43.4936	-42.833				-43.8587	-45.8602		0.595419	-0.0775175
	-39.6866	-44.5884		-43.4871	-42.8289				-43.8515	-45.8834		0.607012	-0.115525
	-39.6724	-44.5827		-43.48	-42.8259				-43.8346	-45.8996		0.616433	-0.143872
	-39.6559	-44.5748		-43.4722	-42.8237				-43.8056	-45.9092		0.622263	-0.161749
	-39.6375	-44.5652		-43.4639	-42.8221				-43.7656	-45.9157		0.623404	-0.168819
	-39.6179	-44.5551		-43.4552	-42.821				-43.7205	-45.9248		0.619164	-0.165204
	-39.5978	-44.5451		-43.4462	-42.82				-43.6778	-45.9417		0.609307	-0.151428
	-39.5775	-44.5361		-43.437	-42.8191				-43.643	-45.9661		0.594049	-0.128347
	-39.5574	-44.5286		-43.4277	-42.8179				-43.6181	-45.9897		0.574019	-0.097066
	-39.5378	-44.5229		-43.4186	-42.8163				-43.6025	-46.0006		0.550182	-0.0588524
	-39.5185	-44.5189		-43.4098	-42.8139				-43.5953	-45.9915		0.523737	-0.0150554
	-39.4994	-44.516		-43.4012	-42.8107				-43.5958	-45.9655		0.496006	0.0329588
	-39.4802	-44.5136		-43.3931	-42.8065				-43.6035	-45.9346		0.468317	0.0838528
	-39.4605	-44.5112		-43.3855	-42.8012				-43.6171	-45.9115		0.441907	0.136342
	-39.4399	-44.5081		-43.3783	-42.7946				-43.6345	-45.9029		0.41784	0.189198
	-39.4182	-44.5039		-43.3716	-42.7868				-43.6516	-45.9072		0.396952	0.241238
	-39.3954	-44.4988		-43.3653	-42.7779				-43.6625	-45.9182		0.37983	0.291311
	-39.3717	-44.493		-43.3594	-42.7679				-43.6618	-45.9292		0.366819	0.338276
	-39.3473	-44.4868		-43.3537	-42.7571				-43.6468	-45.9352		0.358043	0.380996
	-39.323	-44.4808		-43.3481	-42.7457				-43.62	-45.934		0.353456	0.41835
	-39.2994	-44.4754		-43.3425	-42.7339				-43.5881	-45.9261		0.352885	0.449259
	-39.2772	-44.4708		-43.3366	-42.722				-43.5595	-45.9141		0.356087	0.472732
	-39.2569	-44.4669		-43.3304	-42.7103				-43.5413	-45.9007		0.362782	0.487925
	-39.2387	-44.4636		-43.3237	-42.6991				-43.5362	-45.8861		0.372685	0.494211
	-39.2223	-44.4604		-43.3164	-42.6886				-43.5418	-45.8676		0.385518	0.491245
	-39.2074	-44.4565		-43.3085	-42.6789				-43.552	-45.8408		0.401011	0.479012
	-39.1931	-44.4514		-43.2999	-42.6702				-43.5606	-45.8034		0.418889	0.45786
	-39.1785	-44.4443		-43.2908	-42.6625				-43.564	-45.7573		0.438854	0.4285
	-39.1628	-44.4346		-43.281	-42.6557				-43.5622	-45.71		0.460566	0.391972
	-39.145	-44.422		-43.2708	-42.6497				-43.5567	-45.6717		0.483631	0.349582
	-39.1246	-44.4064		-43.2602	-42.6445				-43.548	-45.6524		0.507593	0.302824
	-39.1011	-44.3881		-43.2493	-42.6398				-43.5355	-45.6565		0.531935	0.253272
	-39.0743	-44.3674		-43.2383	-42.6356				-43.5188	-45.6819		0.556094	0.202485
	-39.0442	-44.3452		-43.2273	-42.6317				-43.4989	-45.7205		0.579485	0.151916
	-39.0108	-44.3224		-43.2164	-42.628				-43.4782	-45.7612		0.601529	0.102843
	-38.9745	-44.2998		-43.2056	-42.6243				-43.4591	-45.794		0.621689	0.0563316
	-38.9358	-44.2784		-43.1951	-42.6206				-43.4423	-45.812		0.639501	0.0132304
	-38.8955	-44.2587		-43.1848	-42.6169				-43.4272	-45.8132		0.654608	-0.0258058
	-38.8546	-44.2411		-43.1749	-42.6129				-43.4133	-45.8004		0.666784	-0.0602682
	-38.8142	-44.2259		-43.1654	-42.6088				-43.4008	-45.78		0.675946	-0.0897325
	-38.7758	-44.2129		-43.1561	-42.6043				-43.3896	-45.759		0.682163	-0.113799
	-38.7407	-44.2017		-43.1472	-42.5995				-43.3788	-45.7419		0.685649	-0.132044
	-38.71	-44.1919		-43.1385	-42.5943				-43.366	-45.7298		0.686745	-0.143993
	-38.6845	-44.183		-43.13	-42.5885				-43.3488	-45.722		0.685891	-0.149125
	-38.6647	-44.1745		-43.1217	-42.5822				-43.327	-45.7195		0.683594	-0.1469
	-38.6504	-44.1659		-43.1135	-42.5753				-43.3021	-45.7252		0.680384	-0.136823
	-38.6411	-44.1571		-43.1052	-42.5677				-43.2776	-45.7426		0.67677	-0.118521
	-38.6358	-44.1478		-43.097	-42.5596				-43.2567	-45.7716		0.673198	-0.0918194
	-38.6334	-44.1383		-43.0885	-42.5509				-43.2425	-45.8087		0.670011	-0.0568273
	-38.6326	-44.1288		-43.08	-42.5417				-43.2369	-45.8476		0.667419	-0.0139919
	-38.6323	-44.1198		-43.0712	-42.5321				-43.2401	-45.8819		0.665479	0.0358677
	-38.6314	-44.1118		-43.0622	-42.522				-43.2492	-45.9059		0.664089	0.0915628
	-38.629	-44.1053		-43.0529	-42.5115				-43.2581	-45.914		0.662994	0.15157
	-38.6244	-44.1008		-43.0433	-42.5006				-43.2596	-45.9033		0.661812	0.214098
	-38.6172	-44.0984		-43.0334	-42.4893				-43.2478	-45.8752		0.660063	0.277178
	-38.6073	-44.0981		-43.0233	-42.4774				-43.2219	-45.837		0.65722	0.338763
	-38.5945	-44.0994		-43.0128	-42.465				-43.1856	-45.7981		0.652757	0.39684
	-38.5791	-44.1018		-43.0021	-42.4519				-43.1464	-45.7659		0.646199	0.449525
	-38.5613	-44.1042		-42.9912	-42.438				-43.112	-45.7425		0.637182	0.495151
	-38.5415	-44.1056		-42.9801	-42.4233				-43.0882	-45.7263		0.625488	0.532328
	-38.5205	-44.1049		-42.9689	-42.4077				-43.0769	-45.7153		0.611084	0.559993
	-38.499	-44.1014		-42.9579	-42.3912				-43.0762	-45.7085		0.594146	0.577433
	-38.4779	-44.0945		-42.9471	-42.3739				-43.0814	-45.7046		0.575062	0.584288
	-38.4581	-44.084		-42.9367	-42.3559				-43.0858	-45.7003		0.554425	0.580553
	-38.4406	-44.0701		-42.9269	-42.3372				-43.0833	-45.6905		0.533016	0.566568
	-38.4258	-44.0534		-42.9178	-42.318				-43.0698	-45.671		0.511756	0.542999
	-38.4142	-44.0344		-42.9096	-42.2985				-43.0454	-45.6421		0.491671	0.510825
	-38.4055	-44.0137		-42.9024	-42.279				-43.0145	-45.6095		0.473827	0.471322
	-38.3991	-43.9918		-42.8962	-42.2596				-42.985	-45.5814		0.459274	0.426038
	-38.3941	-43.9691		-42.8911	-42.2404				-42.965	-45.5642		0.448988	0.376767
	-38.3893	-43.9458		-42.8869	-42.2216				-42.96	-45.5584		0.443816	0.325503
	-38.3832	-43.9221		-42.8837	-42.2033				-42.9706	-45.5592		0.444434	0.274391
	-38.3749	-43.8981		-42.8812	-42.1856				-42.9924	-45.5599		0.451317	0.225651
	-38.3633	-43.8741		-42.8793	-42.1684				-43.0172	-45.5557		0.464726	0.181492
	-38.3479	-43.8507		-42.8777	-42.1517				-43.0362	-45.5467		0.484711	0.144014
	-38.3288	-43.8283		-42.8763	-42.1354				-43.0432	-45.5372		0.511129	0.115104
	-38.3061	-43.8073		-42.8749	-42.1194				-43.0365	-45.535		0.543679	0.0963303
	-38.2803	-43.7883		-42.8733	-42.1034				-43.0179	-45.5475		0.581941	0.0888519
	-38.2522	-43.7713		-42.8713	-42.0874				-42.9909	-45.5772		0.625418	0.093341
	-38.2225	-43.7564		-42.8689	-42.0711				-42.9589	-45.6191		0.673573	0.109936
	-38.1921	-43.7432		-42.8659	-42.0543				-42.9256	-45.6618		0.725864	0.138225
	-38.1619	-43.7312		-42.8623	-42.0371				-42.896	-45.6924		0.781759	0.177259
	-38.1329	-43.7198		-42.8582	-42.0192				-42.8743	-45.7031		0.840738	0.22561
	-38.106	-43.7085		-42.8536	-42.0007				-42.8627	-45.694		0.902286	0.281444
	-38.0822	-43.6966		-42.8486	-41.9816				-42.8596	-45.6709		0.965866	0.34263
	-38.0622	-43.6837		-42.8433	-41.9618				-42.8605	-45.6409		1.03089	0.406865
	-38.0466	-43.6693		-42.8378	-41.9415				-42.859	-45.6091		1.0967	0.471802
	-38.0357	-43.6532		-42.8321	-41.9209				-42.8497	-45.5791		1.16254	0.535181
	-38.0292	-43.6351		-42.8262	-41.8999				-42.8296	-45.5541		1.22751	0.594957
	-38.0267	-43.6148		-42.8202	-41.8788				-42.7994	-45.5373		1.29065	0.649404
	-38.0271	-43.592		-42.8141	-41.8577				-42.7631	-45.5288		1.35086	0.697209
	-38.0295	-43.5667		-42.8077	-41.8367				-42.7258	-45.5253		1.40703	0.737535
	-38.0327	-43.5388		-42.8009	-41.8159				-42.6909	-45.5201		1.45804	0.770057
	-38.0354	-43.5086		-42.7938	-41.7953				-42.6587	-45.5061		1.50284	0.794972
	-38.0371	-43.4763		-42.786	-41.7751				-42.6261	-45.4786		1.54055	0.812976
	-38.037	-43.4425		-42.7775	-41.7552				-42.5891	-45.4375		1.57047	0.825211
	-38.0349	-43.4081		-42.7682	-41.7356				-42.5449	-45.3892		1.59221	0.833187
	-38.0309	-43.3739		-42.7579	-41.7163				-42.4945	-45.3438		1.6057	0.838672
	-38.0249	-43.3409		-42.7465	-41.6974				-42.4421	-45.3108		1.61123	0.84357
	-38.0171	-43.3098		-42.734	-41.6788				-42.3934	-45.2947		1.60947	0.849777
	-38.0075	-43.2813		-42.7204	-41.6604				-42.3522	-45.2931		1.60141	0.859044
	-37.996	-43.2556		-42.7055	-41.6423				-42.3192	-45.2993		1.58838	0.87283
	-37.9825	-43.2325		-42.6894	-41.6243				-42.2921	-45.3065		1.57196	0.892187
	-37.9668	-43.2115		-42.6721	-41.6065				-42.2674	-45.3114		1.55387	0.917661
	-37.9487	-43.1918		-42.6536	-41.5887				-42.2413	-45.3149		1.53594	0.949231
	-37.9283	-43.1725		-42.634	-41.5707				-42.2114	-45.3189		1.51993	0.986296
	-37.906	-43.1527		-42.6134	-41.5526				-42.1787	-45.3228		1.50748	1.0277
	-37.8824	-43.1316		-42.5919	-41.5341				-42.147	-45.3212		1.49999	1.0718
	-37.8584	-43.1086		-42.5697	-41.515				-42.1213	-45.3071		1.49852	1.11659
	-37.8349	-43.0834		-42.547	-41.4954				-42.1044	-45.2757		1.50373	1.15984
	-37.813	-43.056		-42.524	-41.4749				-42.0947	-45.2283		1.51582	1.19925
	-37.7933	-43.0266		-42.5009	-41.4536				-42.0867	-45.1717		1.53452	1.23265
	-37.7762	-42.9955		-42.4781	-41.4314				-42.0742	-45.1145		1.5591	1.25812
	-37.7616	-42.963		-42.4556	-41.4083				-42.054	-45.0638		1.5884	1.27419
	-37.7487	-42.9297		-42.4338	-41.3842				-42.0269	-45.0226		1.62092	1.2799
	-37.7365	-42.8957		-42.4129	-41.3593				-41.9964	-44.9901		1.6549	1.27491
	-37.7236	-42.8616		-42.3929	-41.3334				-41.9645	-44.9624		1.68847	1.25952
	-37.7086	-42.8276		-42.374	-41.3069				-41.9301	-44.9351		1.71977	1.23464
	-37.6901	-42.7939		-42.3562	-41.2797				-41.8888	-44.9043		1.74706	1.20172
	-37.6668	-42.7607		-42.3393	-41.2519				-41.8376	-44.869		1.76888	1.16268
	-37.638	-42.7283		-42.3234	-41.2237				-41.7776	-44.8315		1.78416	1.11973
	-37.6034	-42.6968		-42.3081	-41.1952				-41.7145	-44.7972		1.79229	1.07525
	-37.5631	-42.6664		-42.2932	-41.1665				-41.6556	-44.7717		1.79315	1.0316
	-37.5175	-42.6372		-42.2785	-41.1377				-41.6058	-44.7585		1.78716	0.990988
	-37.4674	-42.6091		-42.2636	-41.1089				-41.565	-44.7568		1.77523	0.955295
	-37.4139	-42.5823		-42.2483	-41.0803				-41.5293	-44.7625		1.75867	0.925986
	-37.3579	-42.5566		-42.2323	-41.0521				-41.4941	-44.7707		1.73911	0.904013
	-37.3003	-42.5319		-42.2153	-41.0244				-41.4573	-44.7777		1.71837	0.889788
	-37.2415	-42.5081		-42.1973	-40.9973				-41.4205	-44.7812		1.6983	0.88318
	-37.1816	-42.485		-42.178	-40.9711				-41.388	-44.78		1.68063	0.883569
	-37.1198	-42.4624		-42.1574	-40.9457				-41.3638	-44.7735		1.66685	0.889924
	-37.0548	-42.4399		-42.1355	-40.9213				-41.3494	-44.7613		1.65807	0.900925
	-36.9847	-42.4173		-42.1124	-40.8979				-41.3423	-44.7428		1.65497	0.915084
	-36.907	-42.394		-42.0881	-40.8755				-41.3366	-44.7164		1.6577	0.930887
	-36.8188	-42.3694		-42.0628	-40.8542				-41.3251	-44.6806		1.66589	0.946921
	-36.7176	-42.3429		-42.0367	-40.8337				-41.3032	-44.6355		1.67871	0.961981
	-36.6007	-42.3138		-42.0099	-40.814				-41.2705	-44.5858		1.69492	0.975156
	-36.4659	-42.2816		-41.9825	-40.7951				-41.2311	-44.5398		1.71299	0.985871
	-36.3116	-42.2458		-41.9548	-40.7768				-41.19	-44.5066		1.7312	0.993904
	-36.1363	-42.2061		-41.9269	-40.7591				-41.1502	-44.4902		1.74783	0.999361
	-35.9394	-42.1623		-41.8989	-40.742				-41.111	-44.4867		1.76125	1.00262
	-35.7201	-42.1145		-41.871	-40.7254				-41.0684	-44.486		1.77006	1.00426
	-35.4783	-42.0629		-41.8431	-40.7094				-41.0183	-44.4795		1.7732	1.00495
	-35.2136	-42.0078		-41.8155	-40.6941				-40.9593	-44.465		1.77004	1.00541
	-34.9258	-41.9497		-41.788	-40.6794				-40.8954	-44.4464		1.76033	1.00625
	-34.6147	-41.8893		-41.7607	-40.6654				-40.8342	-44.4279		1.74431	1.00795
	-34.28	-41.8271		-41.7335	-40.6522				-40.7835	-44.4095		1.72258	1.01082
	-33.9211	-41.7637		-41.7064	-40.6398				-40.7471	-44.3886		1.69608	1.01493
	-33.5369	-41.6999		-41.6793	-40.6282				-40.7238	-44.3639		1.66597	1.02015
	-33.126	-41.6362		-41.6522	-40.6173				-40.709	-44.3391		1.63358	1.0262
	-32.6862	-41.5729		-41.6251	-40.607				-40.697	-44.3199		1.60025	1.03265
	-32.2144	-41.5106		-41.598	-40.5972				-40.6823	-44.3094		1.56727	1.03905
	-31.7068	-41.4495		-41.5709	-40.5878				-40.6616	-44.3042		1.5358	1.04496
	-31.159	-41.3898		-41.5439	-40.5785				-40.634	-44.2961		1.50681	1.05007
	-30.5665	-41.3317		-41.517	-40.5692				-40.6014	-44.2768		1.48105	1.05422
	-29.9246	-41.2751		-41.4904	-40.5596				-40.5673	-44.243		1.45904	1.05749
	-29.2293	-41.2201		-41.4642	-40.5496				-40.5347	-44.1978		1.44108	1.06021
	-28.4777	-41.1664		-41.4384	-40.5389				-40.5056	-44.1485		1.42732	1.06291
	-27.6684	-41.1137		-41.4132	-40.5272				-40.4803	-44.103		1.41773	1.06634
	-26.8014	-41.0615		-41.3885	-40.5145				-40.4583	-44.0667		1.41225	1.07135
	-25.8788	-41.0093		-41.3645	-40.5005				-40.4383	-44.0424		1.41074	1.07882
	-24.9043	-40.9566		-41.3411	-40.4852				-40.4179	-44.0303		1.41309	1.08954
	-23.8833	-40.9027		-41.3183	-40.4685				-40.3941	-44.0291		1.41924	1.1041
	-22.8228	-40.8472		-41.296	-40.4505				-40.3647	-44.0352		1.42916	1.12282
	-21.7307	-40.7895		-41.2742	-40.4312				-40.3288	-44.0437		1.44287	1.14563
	-20.6162	-40.7293		-41.2528	-40.4109				-40.2885	-44.0489		1.46043	1.17206
	-19.4888	-40.6664		-41.2317	-40.3897				-40.2479	-44.0465		1.48187	1.20122
	-18.3586	-40.6011		-41.2108	-40.3679				-40.212	-44.034		1.50715	1.23184
	-17.2354	-40.5336		-41.1899	-40.3457				-40.1847	-44.0106		1.53613	1.26237
	-16.129	-40.4645		-41.1692	-40.3235				-40.1673	-43.9769		1.56849	1.29105
	-15.0485	-40.3946		-41.1484	-40.3015				-40.1565	-43.9347		1.60372	1.31612
	-14.0023	-40.3247		-41.1274	-40.2798				-40.1458	-43.8869		1.64106	1.3359
	-12.9977	-40.2555		-41.1063	-40.2587				-40.128	-43.8374		1.67955	1.34901
	-12.0411	-40.1877		-41.0848	-40.2382				-40.0993	-43.789		1.71801	1.35443
	-11.1377	-40.1216		-41.063	-40.2183				-40.0614	-43.743		1.75512	1.35166
	-10.2916	-40.0572		-41.0407	-40.1989				-40.0201	-43.699		1.78945	1.34077
	-9.50606	-39.9944		-41.0178	-40.1798				-39.9801	-43.6568		1.81962	1.32238
	-8.78308	-39.9327		-40.9942	-40.1609				-39.9415	-43.6181		1.84436	1.29767
	-8.12388	-39.8714		-40.97	-40.1418				-39.9002	-43.5856		1.86261	1.2683
	-7.52874	-39.8098		-40.945	-40.1225				-39.8515	-43.5602		1.87361	1.23627
	-6.99707	-39.7471		-40.9193	-40.1025				-39.7943	-43.5398		1.877	1.20377
	-6.52758	-39.6828		-40.893	-40.0819				-39.7309	-43.5217		1.87283	1.17305
	-6.1183	-39.6162		-40.8661	-40.0604				-39.6652	-43.5056		1.86161	1.14625
	-5.76681	-39.5472		-40.8388	-40.0381				-39.6015	-43.4943		1.84425	1.1252
	-5.47035	-39.4755		-40.8113	-40.0149				-39.5452	-43.4904		1.82202	1.11133
	-5.22598	-39.4011		-40.7838	-39.991				-39.5025	-43.4927		1.79646	1.10555
	-5.0307	-39.3242		-40.7565	-39.9666				-39.4779	-43.4959		1.7693	1.10817
	-4.88144	-39.2448		-40.7296	-39.9418				-39.4701	-43.4937		1.74227	1.11891
	-4.77513	-39.1631		-40.7034	-39.917				-39.4701	-43.4829		1.71706	1.13689
	-4.70867	-39.0791		-40.678	-39.8922				-39.4652	-43.464		1.69515	1.16072
	-4.67888	-38.9929		-40.6537	-39.8678				-39.4453	-43.4407		1.67775	1.18858
	-4.68261	-38.9044		-40.6305	-39.8439				-39.4093	-43.4165		1.6657	1.2184
	-4.71677	-38.8136		-40.6085	-39.8206				-39.3639	-43.3926		1.65948	1.24794
	-4.77852	-38.7203		-40.588	-39.798				-39.32	-43.367		1.65914	1.27502
	-4.86536	-38.6243		-40.5689	-39.776				-39.2859	-43.3349		1.66438	1.29764
	-4.97531	-38.5257		-40.5514	-39.7546				-39.2641	-43.2927		1.67461	1.31416
	-5.10696	-38.4243		-40.5354	-39.7335				-39.251	-43.2412		1.68896	1.32336
	-5.25948	-38.3201		-40.521	-39.7126				-39.2381	-43.1871		1.70644	1.32462
[truncated: 2,453 more rows]
