# Supplementary material for: Dendritic sodium spikes are required for long-term potentiation at distal synapses on hippocampal pyramidal neurons
Source: eLife journal article supplement (doi:10.7554/elife.06414), 2015-08-06
Supplement: supp [file elife_poa_e06414_Figure_4_source_data_2.xlsx]

## Sheet: Figure 4S1
Panel A	Left	Control	Nimo	fit	independent variable	dependent variable	upper bound	lower bound	Right	Control	Nimo	fit	independent variable	dependent variable	upper bound	lower bound		Panel B		Amplitude	Integral		Panel C	amplitude			integral			x	fit	lower bound	upper bound		Panel D		amplitude	integral		x	fit	lower bound	upper bound
		2.89951	3.52714		2.22376	2.76302	3.96483	1.5612		0.0761264	0.0957584		0.0761264	0.0925841	0.118712	0.0664561			Mean	1.09961	1.08799			control	Nimo		control	Nimo		44.5688	36.2807	15.6049	56.9566				0.972319	0.981939		2.57724	2.5264	1.91705	3.13575
		3.99497	3.77561		2.22553	2.76425	3.9645	1.56399		0.149271	0.140519		0.0761996	0.0926324	0.118725	0.0665394			SEM	0.0568672	0.0690113			86.7729	84.3709		-4.09215	-4.01825		45.0804	36.8799	16.376	57.3839				1.20778	0.982338		2.60113	2.55095	1.94644	3.15545
		2.22376	2.52459		2.22731	2.76547	3.96416	1.56678		0.0920478	0.0938222		0.0762728	0.0926808	0.118739	0.0666228								146.39	176.806		-3.09986	-3.04511		45.5921	37.4791	17.1463	57.812				0.747117	0.932149		2.62502	2.5755	1.9758	3.17519
		3.3644	3.70626		2.22908	2.7667	3.96383	1.56956		0.103119	0.11688		0.0763461	0.0927291	0.118752	0.0667061								75.5811	56.468		-4.73081	-4.40982		46.1038	38.0784	17.9157	58.241				0.84402	0.966881		2.64891	2.60005	2.00514	3.19495
					2.23085	2.76792	3.9635	1.57235					0.0764193	0.0927775	0.118766	0.0667894								44.5688	37.6169		-7.33104	-7.08825		46.6154	38.6776	18.6843	58.6708				1.11827	1.27571		2.6728	2.62459	2.03444	3.21475
					2.23262	2.76915	3.96317	1.57513					0.0764925	0.0928258	0.118779	0.0668726								66.6041	74.4813		-3.43051	-4.37635		47.1271	39.2768	19.452	59.1015				1.00772	0.909132		2.69669	2.64914	2.06371	3.23458
					2.2344	2.77038	3.96284	1.57791					0.0765657	0.0928742	0.118793	0.0669558								78.282	78.8862		-2.57724	-2.34306		47.6388	39.876	20.2188	59.5332				0.800922	0.902933		2.72058	2.67369	2.09295	3.25443
					2.23617	2.7716	3.96251	1.5807					0.0766389	0.0929225	0.118806	0.0670389								118.213	94.6791		-3.27715	-2.95905		48.1504	40.4752	20.9846	59.9657				1.03161	1.10313		2.74446	2.69824	2.12215	3.27433
					2.23794	2.77283	3.96218	1.58348					0.0767121	0.0929709	0.11882	0.067122								56.4347	58.2188		-6.29159	-6.94042		48.6621	41.0744	21.7495	60.3992				0.969944	0.903973		2.76835	2.72279	2.15133	3.29425
					2.23972	2.77406	3.96186	1.58625					0.0767854	0.0930192	0.118833	0.0672051								83.4496	80.9414		-3.93048	-3.55304		49.1738	41.6736	22.5135	60.8337							2.79224	2.74734	2.18046	3.31421
					2.24149	2.77528	3.96153	1.58903					0.0768586	0.0930676	0.118847	0.0672881														49.6854	42.2728	23.2764	61.2692			Mean	0.966633	0.995354		2.81613	2.77188	2.20957	3.3342
					2.24326	2.77651	3.96121	1.59181					0.0769318	0.0931159	0.118861	0.0673711														50.1971	42.872	24.0383	61.7057			SEM	0.0496905	0.0407734		2.84002	2.79643	2.23863	3.35423
					2.24504	2.77774	3.96089	1.59458					0.077005	0.0931643	0.118875	0.067454														50.7088	43.4712	24.7991	62.1432							2.86391	2.82098	2.26766	3.3743
					2.24681	2.77896	3.96056	1.59736					0.0770782	0.0932126	0.118888	0.0675369														51.2204	44.0704	25.5589	62.5819							2.88779	2.84553	2.29665	3.39441
					2.24858	2.78019	3.96024	1.60013					0.0771514	0.093261	0.118902	0.0676197														51.7321	44.6696	26.3175	63.0217							2.91168	2.87008	2.32561	3.41455
					2.25035	2.78141	3.95992	1.6029					0.0772247	0.0933093	0.118916	0.0677025														52.2438	45.2688	27.075	63.4626							2.93557	2.89463	2.35452	3.43473
					2.25213	2.78264	3.95961	1.60568					0.0772979	0.0933577	0.11893	0.0677853														52.7554	45.868	27.8313	63.9046							2.95946	2.91918	2.38339	3.45496
					2.2539	2.78387	3.95929	1.60845					0.0773711	0.093406	0.118944	0.067868														53.2671	46.4672	28.5865	64.3479							2.98335	2.94372	2.41222	3.47523
					2.25567	2.78509	3.95897	1.61121					0.0774443	0.0934544	0.118958	0.0679506														53.7787	47.0664	29.3404	64.7924							3.00724	2.96827	2.44101	3.49553
					2.25745	2.78632	3.95866	1.61398					0.0775175	0.0935027	0.118972	0.0680333														54.2904	47.6656	30.093	65.2382							3.03112	2.99282	2.46976	3.51589
					2.25922	2.78755	3.95834	1.61675					0.0775908	0.0935511	0.118986	0.0681158														54.8021	48.2648	30.8443	65.6853							3.05501	3.01737	2.49845	3.53629
					2.26099	2.78877	3.95803	1.61951					0.077664	0.0935995	0.119001	0.0681984														55.3137	48.864	31.5943	66.1337							3.0789	3.04192	2.52711	3.55673
					2.26277	2.79	3.95772	1.62228					0.0777372	0.0936478	0.119015	0.0682808														55.8254	49.4632	32.3429	66.5835							3.10279	3.06647	2.55571	3.57722
					2.26454	2.79123	3.95741	1.62504					0.0778104	0.0936962	0.119029	0.0683633														56.3371	50.0624	33.0902	67.0347							3.12668	3.09102	2.58427	3.59776
					2.26631	2.79245	3.9571	1.6278					0.0778836	0.0937445	0.119043	0.0684457														56.8487	50.6616	33.8359	67.4873							3.15057	3.11556	2.61278	3.61835
					2.26808	2.79368	3.95679	1.63057					0.0779568	0.0937929	0.119058	0.068528														57.3604	51.2608	34.5802	67.9414							3.17446	3.14011	2.64124	3.63899
					2.26986	2.7949	3.95648	1.63332					0.0780301	0.0938412	0.119072	0.0686103														57.8721	51.86	35.323	68.3971							3.19834	3.16466	2.66965	3.65968
					2.27163	2.79613	3.95618	1.63608					0.0781033	0.0938896	0.119087	0.0686926														58.3837	52.4592	36.0642	68.8542							3.22223	3.18921	2.698	3.68042
					2.2734	2.79736	3.95587	1.63884					0.0781765	0.0939379	0.119101	0.0687748														58.8954	53.0584	36.8038	69.313							3.24612	3.21376	2.7263	3.70122
					2.27518	2.79858	3.95557	1.6416					0.0782497	0.0939863	0.119116	0.068857														59.4071	53.6576	37.5418	69.7735							3.27001	3.23831	2.75454	3.72207
					2.27695	2.79981	3.95527	1.64435					0.0783229	0.0940346	0.11913	0.0689391														59.9187	54.2568	38.2781	70.2356							3.2939	3.26286	2.78273	3.74298
					2.27872	2.80104	3.95497	1.64711					0.0783962	0.094083	0.119145	0.0690211														60.4304	54.856	39.0126	70.6994							3.31779	3.2874	2.81086	3.76395
					2.2805	2.80226	3.95467	1.64986					0.0784694	0.0941313	0.119159	0.0691032														60.9421	55.4552	39.7454	71.1651							3.34167	3.31195	2.83893	3.78498
					2.28227	2.80349	3.95437	1.65261					0.0785426	0.0941797	0.119174	0.0691851														61.4537	56.0544	40.4764	71.6325							3.36556	3.3365	2.86694	3.80606
					2.28404	2.80472	3.95407	1.65536					0.0786158	0.094228	0.119189	0.0692671														61.9654	56.6536	41.2055	72.1018							3.38945	3.36105	2.89489	3.82721
					2.28581	2.80594	3.95377	1.65811					0.078689	0.0942764	0.119204	0.069349														62.477	57.2528	41.9327	72.573							3.41334	3.3856	2.92277	3.84843
					2.28759	2.80717	3.95348	1.66086					0.0787622	0.0943247	0.119219	0.0694308														62.9887	57.8521	42.6579	73.0462							3.43723	3.41015	2.95059	3.8697
					2.28936	2.80839	3.95319	1.6636					0.0788355	0.0943731	0.119234	0.0695126														63.5004	58.4513	43.3811	73.5214							3.46112	3.43469	2.97834	3.89105
					2.29113	2.80962	3.95289	1.66635					0.0789087	0.0944214	0.119249	0.0695943														64.012	59.0505	44.1022	73.9987							3.48501	3.45924	3.00603	3.91246
					2.29291	2.81085	3.9526	1.66909					0.0789819	0.0944698	0.119264	0.069676														64.5237	59.6497	44.8213	74.4781							3.50889	3.48379	3.03364	3.93394
					2.29468	2.81207	3.95231	1.67184					0.0790551	0.0945181	0.119279	0.0697576														65.0354	60.2489	45.5381	74.9596							3.53278	3.50834	3.06119	3.95549
					2.29645	2.8133	3.95202	1.67458					0.0791283	0.0945665	0.119294	0.0698392														65.547	60.8481	46.2528	75.4433							3.55667	3.53289	3.08866	3.97711
					2.29823	2.81453	3.95173	1.67732					0.0792015	0.0946148	0.119309	0.0699208														66.0587	61.4473	46.9652	75.9294							3.58056	3.55744	3.11607	3.99881
					2.3	2.81575	3.95145	1.68006					0.0792748	0.0946632	0.119324	0.0700023														66.5704	62.0465	47.6752	76.4177							3.60445	3.58199	3.14339	4.02058
					2.30177	2.81698	3.95116	1.68279					0.079348	0.0947115	0.119339	0.0700837														67.082	62.6457	48.3829	76.9084							3.62834	3.60653	3.17064	4.04243
					2.30354	2.81821	3.95088	1.68553					0.0794212	0.0947599	0.119355	0.0701651														67.5937	63.2449	49.0882	77.4016							3.65222	3.63108	3.19782	4.06435
					2.30532	2.81943	3.9506	1.68827					0.0794944	0.0948083	0.11937	0.0702465														68.1054	63.8441	49.791	77.8972							3.67611	3.65563	3.22491	4.08635
					2.30709	2.82066	3.95031	1.691					0.0795676	0.0948566	0.119385	0.0703278														68.617	64.4433	50.4912	78.3954							3.7	3.68018	3.25192	4.10844
					2.30886	2.82188	3.95003	1.69373					0.0796409	0.094905	0.119401	0.070409														69.1287	65.0425	51.1888	78.8961							3.72389	3.70473	3.27885	4.1306
					2.31064	2.82311	3.94976	1.69647					0.0797141	0.0949533	0.119416	0.0704902														69.6404	65.6417	51.8838	79.3996							3.74778	3.72928	3.3057	4.15285
					2.31241	2.82434	3.94948	1.6992					0.0797873	0.0950017	0.119432	0.0705713														70.152	66.2409	52.5761	79.9057							3.77167	3.75383	3.33247	4.17518
					2.31418	2.82556	3.9492	1.70192					0.0798605	0.09505	0.119448	0.0706524														70.6637	66.8401	53.2656	80.4146							3.79555	3.77837	3.35915	4.1976
					2.31596	2.82679	3.94893	1.70465					0.0799337	0.0950984	0.119463	0.0707335														71.1753	67.4393	53.9523	80.9263							3.81944	3.80292	3.38574	4.22011
					2.31773	2.82802	3.94865	1.70738					0.0800069	0.0951467	0.119479	0.0708145														71.687	68.0385	54.6361	81.4409							3.84333	3.82747	3.41224	4.2427
					2.3195	2.82924	3.94838	1.7101					0.0800802	0.0951951	0.119495	0.0708954														72.1987	68.6377	55.317	81.9585							3.86722	3.85202	3.43865	4.26538
					2.32127	2.83047	3.94811	1.71283					0.0801534	0.0952434	0.119511	0.0709763														72.7103	69.2369	55.9948	82.479							3.89111	3.87657	3.46498	4.28816
					2.32305	2.8317	3.94784	1.71555					0.0802266	0.0952918	0.119526	0.0710571														73.222	69.8361	56.6697	83.0025							3.915	3.90112	3.49121	4.31103
					2.32482	2.83292	3.94757	1.71827					0.0802998	0.0953401	0.119542	0.0711379														73.7337	70.4353	57.3415	83.5292							3.93889	3.92566	3.51734	4.33399
					2.32659	2.83415	3.9473	1.72099					0.080373	0.0953885	0.119558	0.0712187														74.2453	71.0345	58.0101	84.0589							3.96277	3.95021	3.54339	4.35704
					2.32837	2.83537	3.94704	1.72371					0.0804463	0.0954368	0.119574	0.0712993														74.757	71.6337	58.6755	84.5919							3.98666	3.97476	3.56933	4.38019
					2.33014	2.8366	3.94677	1.72643					0.0805195	0.0954852	0.11959	0.07138														75.2687	72.2329	59.3377	85.1281							4.01055	3.99931	3.59519	4.40343
					2.33191	2.83783	3.94651	1.72914					0.0805927	0.0955335	0.119607	0.0714605														75.7803	72.8321	59.9966	85.6676							4.03444	4.02386	3.62094	4.42678
					2.33368	2.83905	3.94625	1.73186					0.0806659	0.0955819	0.119623	0.0715411														76.292	73.4313	60.6522	86.2105							4.05833	4.04841	3.6466	4.45022
					2.33546	2.84028	3.94599	1.73457					0.0807391	0.0956302	0.119639	0.0716215														76.8037	74.0305	61.3044	86.7567							4.08222	4.07296	3.67215	4.47376
					2.33723	2.84151	3.94573	1.73728					0.0808123	0.0956786	0.119655	0.071702														77.3153	74.6297	61.9531	87.3063							4.1061	4.0975	3.69761	4.4974
					2.339	2.84273	3.94547	1.73999					0.0808856	0.0957269	0.119672	0.0717823														77.827	75.2289	62.5984	87.8595							4.12999	4.12205	3.72297	4.52114
					2.34078	2.84396	3.94522	1.7427					0.0809588	0.0957753	0.119688	0.0718626														78.3387	75.8281	63.2402	88.4161							4.15388	4.1466	3.74822	4.54498
					2.34255	2.84519	3.94496	1.74541					0.081032	0.0958236	0.119704	0.0719429														78.8503	76.4273	63.8785	88.9762							4.17777	4.17115	3.77338	4.56892
					2.34432	2.84641	3.94471	1.74812					0.0811052	0.095872	0.119721	0.0720231														79.362	77.0265	64.5132	89.5399							4.20166	4.1957	3.79843	4.59297
					2.3461	2.84764	3.94446	1.75082					0.0811784	0.0959203	0.119737	0.0721032														79.8736	77.6258	65.1443	90.1072							4.22555	4.22025	3.82338	4.61711
					2.34787	2.84886	3.94421	1.75352					0.0812516	0.0959687	0.119754	0.0721833														80.3853	78.225	65.7717	90.6782							4.24943	4.2448	3.84823	4.64136
					2.34964	2.85009	3.94396	1.75623					0.0813249	0.0960171	0.119771	0.0722634														80.897	78.8242	66.3955	91.2528							4.27332	4.26934	3.87297	4.66572
					2.35141	2.85132	3.94371	1.75893					0.0813981	0.0960654	0.119787	0.0723433														81.4086	79.4234	67.0157	91.831							4.29721	4.29389	3.89761	4.69017
					2.35319	2.85254	3.94346	1.76163					0.0814713	0.0961138	0.119804	0.0724233														81.9203	80.0226	67.6321	92.413							4.3211	4.31844	3.92215	4.71473
					2.35496	2.85377	3.94322	1.76432					0.0815445	0.0961621	0.119821	0.0725031														82.432	80.6218	68.2449	92.9987							4.34499	4.34299	3.94659	4.73939
					2.35673	2.855	3.94297	1.76702					0.0816177	0.0962105	0.119838	0.0725829														82.9436	81.221	68.8539	93.5881							4.36888	4.36754	3.97092	4.76416
					2.35851	2.85622	3.94273	1.76971					0.081691	0.0962588	0.119855	0.0726627														83.4553	81.8202	69.4592	94.1812							4.39277	4.39209	3.99515	4.78903
					2.36028	2.85745	3.94249	1.77241					0.0817642	0.0963072	0.119872	0.0727424														83.967	82.4194	70.0607	94.778							4.41665	4.41664	4.01927	4.814
					2.36205	2.85868	3.94225	1.7751					0.0818374	0.0963555	0.119889	0.0728221														84.4786	83.0186	70.6585	95.3786							4.44054	4.44118	4.0433	4.83907
					2.36383	2.8599	3.94201	1.77779					0.0819106	0.0964039	0.119906	0.0729016														84.9903	83.6178	71.2526	95.9829							4.46443	4.46573	4.06722	4.86424
					2.3656	2.86113	3.94178	1.78048					0.0819838	0.0964522	0.119923	0.0729812														85.502	84.217	71.843	96.591							4.48832	4.49028	4.09104	4.88952
					2.36737	2.86235	3.94154	1.78317					0.082057	0.0965006	0.11994	0.0730607														86.0136	84.8162	72.4296	97.2028							4.51221	4.51483	4.11476	4.9149
					2.36914	2.86358	3.94131	1.78585					0.0821303	0.0965489	0.119958	0.0731401														86.5253	85.4154	73.0125	97.8183							4.5361	4.53938	4.13838	4.94038
					2.37092	2.86481	3.94107	1.78854					0.0822035	0.0965973	0.119975	0.0732194														87.0369	86.0146	73.5917	98.4375							4.55998	4.56393	4.1619	4.96595
					2.37269	2.86603	3.94084	1.79122					0.0822767	0.0966456	0.119993	0.0732987														87.5486	86.6138	74.1673	99.0603							4.58387	4.58847	4.18532	4.99163
					2.37446	2.86726	3.94061	1.7939					0.0823499	0.096694	0.12001	0.073378														88.0603	87.213	74.7391	99.6869							4.60776	4.61302	4.20865	5.0174
					2.37624	2.86849	3.94039	1.79659					0.0824231	0.0967423	0.120027	0.0734572														88.5719	87.8122	75.3074	100.317							4.63165	4.63757	4.23187	5.04327
					2.37801	2.86971	3.94016	1.79926					0.0824964	0.0967907	0.120045	0.0735363														89.0836	88.4114	75.872	100.951							4.65554	4.66212	4.255	5.06924
					2.37978	2.87094	3.93994	1.80194					0.0825696	0.096839	0.120063	0.0736154														89.5953	89.0106	76.4331	101.588							4.67943	4.68667	4.27804	5.0953
					2.38156	2.87217	3.93971	1.80462					0.0826428	0.0968874	0.12008	0.0736944														90.1069	89.6098	76.9906	102.229							4.70332	4.71122	4.30098	5.12146
					2.38333	2.87339	3.93949	1.80729					0.082716	0.0969357	0.120098	0.0737733														90.6186	90.209	77.5446	102.873							4.7272	4.73577	4.32383	5.14771
					2.3851	2.87462	3.93927	1.80996					0.0827892	0.0969841	0.120116	0.0738522														91.1303	90.8082	78.0951	103.521							4.75109	4.76031	4.34658	5.17405
					2.38687	2.87584	3.93905	1.81264					0.0828624	0.0970324	0.120134	0.073931														91.6419	91.4074	78.6422	104.173							4.77498	4.78486	4.36925	5.20048
					2.38865	2.87707	3.93884	1.81531					0.0829357	0.0970808	0.120152	0.0740098														92.1536	92.0066	79.186	104.827							4.79887	4.80941	4.39182	5.227
					2.39042	2.8783	3.93862	1.81797					0.0830089	0.0971291	0.12017	0.0740885														92.6653	92.6058	79.7263	105.485							4.82276	4.83396	4.41431	5.25361
					2.39219	2.87952	3.93841	1.82064					0.0830821	0.0971775	0.120188	0.0741672														93.1769	93.205	80.2634	106.147							4.84665	4.85851	4.43671	5.2803
					2.39397	2.88075	3.93819	1.82331					0.0831553	0.0972258	0.120206	0.0742458														93.6886	93.8042	80.7972	106.811							4.87053	4.88306	4.45903	5.30709
					2.39574	2.88198	3.93798	1.82597					0.0832285	0.0972742	0.120224	0.0743243														94.2003	94.4034	81.3278	107.479							4.89442	4.90761	4.48126	5.33395
					2.39751	2.8832	3.93777	1.82863					0.0833017	0.0973226	0.120242	0.0744028														94.7119	95.0026	81.8552	108.15							4.91831	4.93215	4.50341	5.3609
					2.39929	2.88443	3.93756	1.83129					0.083375	0.0973709	0.120261	0.0744812														95.2236	95.6018	82.3796	108.824							4.9422	4.9567	4.52548	5.38793
					2.40106	2.88566	3.93736	1.83395					0.0834482	0.0974193	0.120279	0.0745595														95.7353	96.201	82.9009	109.501							4.96609	4.98125	4.54746	5.41504
					2.40283	2.88688	3.93715	1.83661					0.0835214	0.0974676	0.120297	0.0746378														96.2469	96.8002	83.4191	110.181							4.98998	5.0058	4.56937	5.44223
					2.4046	2.88811	3.93695	1.83927					0.0835946	0.097516	0.120316	0.074716														96.7586	97.3995	83.9345	110.864							5.01386	5.03035	4.5912	5.46949
					2.40638	2.88933	3.93675	1.84192					0.0836678	0.0975643	0.120334	0.0747942														97.2702	97.9987	84.4469	111.55							5.03775	5.0549	4.61296	5.49684
					2.40815	2.89056	3.93655	1.84457					0.0837411	0.0976127	0.120353	0.0748723														97.7819	98.5979	84.9566	112.239							5.06164	5.07945	4.63464	5.52425
					2.40992	2.89179	3.93635	1.84722					0.0838143	0.097661	0.120372	0.0749503														98.2936	99.1971	85.4634	112.931							5.08553	5.10399	4.65625	5.55174
					2.4117	2.89301	3.93615	1.84987					0.0838875	0.0977094	0.12039	0.0750283														98.8052	99.7963	85.9675	113.625							5.10942	5.12854	4.67778	5.5793
					2.41347	2.89424	3.93596	1.85252					0.0839607	0.0977577	0.120409	0.0751062														99.3169	100.395	86.469	114.322							5.13331	5.15309	4.69925	5.60693
					2.41524	2.89547	3.93577	1.85517					0.0840339	0.0978061	0.120428	0.075184														99.8286	100.995	86.9678	115.022							5.1572	5.17764	4.72065	5.63463
					2.41702	2.89669	3.93557	1.85781					0.0841071	0.0978544	0.120447	0.0752618														100.34	101.594	87.4641	115.724							5.18108	5.20219	4.74198	5.6624
					2.41879	2.89792	3.93538	1.86045					0.0841804	0.0979028	0.120466	0.0753395														100.852	102.193	87.9579	116.428							5.20497	5.22674	4.76324	5.69023
					2.42056	2.89915	3.9352	1.8631					0.0842536	0.0979511	0.120485	0.0754172														101.364	102.792	88.4492	117.135							5.22886	5.25128	4.78444	5.71813
					2.42233	2.90037	3.93501	1.86573					0.0843268	0.0979995	0.120504	0.0754948														101.875	103.391	88.9382	117.845							5.25275	5.27583	4.80558	5.74609
					2.42411	2.9016	3.93482	1.86837					0.0844	0.0980478	0.120523	0.0755723														102.387	103.991	89.4248	118.557							5.27664	5.30038	4.82666	5.77411
					2.42588	2.90282	3.93464	1.87101					0.0844732	0.0980962	0.120543	0.0756497														102.899	104.59	89.9091	119.271							5.30053	5.32493	4.84767	5.80219
					2.42765	2.90405	3.93446	1.87364					0.0845464	0.0981445	0.120562	0.0757271														103.41	105.189	90.3912	119.987							5.32441	5.34948	4.86863	5.83033
					2.42943	2.90528	3.93428	1.87628					0.0846197	0.0981929	0.120581	0.0758045														103.922	105.788	90.8711	120.705							5.3483	5.37403	4.88953	5.85853
					2.4312	2.9065	3.9341	1.87891					0.0846929	0.0982412	0.120601	0.0758817														104.434	106.387	91.3489	121.426							5.37219	5.39858	4.91037	5.88678
					2.43297	2.90773	3.93392	1.88154					0.0847661	0.0982896	0.12062	0.0759589														104.945	106.987	91.8247	122.149							5.39608	5.42312	4.93115	5.91509
					2.43474	2.90896	3.93375	1.88417					0.0848393	0.0983379	0.12064	0.076036														105.457	107.586	92.2984	122.873							5.41997	5.44767	4.95189	5.94346
					2.43652	2.91018	3.93357	1.88679					0.0849125	0.0983863	0.120659	0.0761131														105.969	108.185	92.7701	123.6							5.44386	5.47222	4.97257	5.97188
					2.43829	2.91141	3.9334	1.88942					0.0849858	0.0984346	0.120679	0.0761901														106.48	108.784	93.2399	124.329							5.46775	5.49677	4.9932	6.00034
					2.44006	2.91264	3.93323	1.89204					0.085059	0.098483	0.120699	0.076267														106.992	109.384	93.7078	125.059							5.49163	5.52132	5.01377	6.02886
					2.44184	2.91386	3.93306	1.89466					0.0851322	0.0985314	0.120719	0.0763439														107.504	109.983	94.1739	125.792							5.51552	5.54587	5.0343	6.05743
					2.44361	2.91509	3.9329	1.89728					0.0852054	0.0985797	0.120739	0.0764207														108.015	110.582	94.6382	126.526							5.53941	5.57042	5.05478	6.08605
					2.44538	2.91631	3.93273	1.8999					0.0852786	0.0986281	0.120759	0.0764974														108.527	111.181	95.1008	127.261							5.5633	5.59496	5.07522	6.11471
					2.44716	2.91754	3.93257	1.90251					0.0853518	0.0986764	0.120779	0.0765741														109.039	111.78	95.5616	127.999							5.58719	5.61951	5.09561	6.14342
					2.44893	2.91877	3.93241	1.90513					0.0854251	0.0987248	0.120799	0.0766506														109.55	112.38	96.0208	128.738							5.61108	5.64406	5.11595	6.17217
					2.4507	2.91999	3.93225	1.90774					0.0854983	0.0987731	0.120819	0.0767272														110.062	112.979	96.4784	129.479							5.63496	5.66861	5.13625	6.20097
					2.45247	2.92122	3.93209	1.91035					0.0855715	0.0988215	0.120839	0.0768036														110.574	113.578	96.9345	130.221							5.65885	5.69316	5.15651	6.22981
					2.45425	2.92245	3.93193	1.91296					0.0856447	0.0988698	0.12086	0.07688														111.085	114.177	97.389	130.965							5.68274	5.71771	5.17673	6.25869
					2.45602	2.92367	3.93178	1.91556					0.0857179	0.0989182	0.12088	0.0769563														111.597	114.776	97.842	131.711							5.70663	5.74226	5.1969	6.28761
					2.45779	2.9249	3.93163	1.91817					0.0857912	0.0989665	0.1209	0.0770326														112.109	115.376	98.2935	132.458							5.73052	5.7668	5.21704	6.31657
					2.45957	2.92613	3.93148	1.92077					0.0858644	0.0990149	0.120921	0.0771087														112.62	115.975	98.7437	133.206							5.75441	5.79135	5.23714	6.34557
					2.46134	2.92735	3.93133	1.92337					0.0859376	0.0990632	0.120942	0.0771848														113.132	116.574	99.1924	133.955							5.7783	5.8159	5.2572	6.3746
					2.46311	2.92858	3.93118	1.92597					0.0860108	0.0991116	0.120962	0.0772609														113.644	117.173	99.6399	134.706							5.80218	5.84045	5.27722	6.40368
					2.46489	2.9298	3.93104	1.92857					0.086084	0.0991599	0.120983	0.0773368														114.155	117.772	100.086	135.459							5.82607	5.865	5.29721	6.43279
					2.46666	2.93103	3.93089	1.93117					0.0861572	0.0992083	0.121004	0.0774127														114.667	118.372	100.531	136.212							5.84996	5.88955	5.31716	6.46193
					2.46843	2.93226	3.93075	1.93376					0.0862305	0.0992566	0.121025	0.0774885														115.179	118.971	100.974	136.967							5.87385	5.91409	5.33708	6.49111
					2.4702	2.93348	3.93061	1.93636					0.0863037	0.099305	0.121046	0.0775643														115.69	119.57	101.417	137.723							5.89774	5.93864	5.35696	6.52033
					2.47198	2.93471	3.93047	1.93895					0.0863769	0.0993533	0.121067	0.0776399														116.202	120.169	101.858	138.48							5.92163	5.96319	5.37681	6.54957
					2.47375	2.93594	3.93034	1.94153					0.0864501	0.0994017	0.121088	0.0777155														116.714	120.768	102.298	139.239							5.94551	5.98774	5.39663	6.57885
					2.47552	2.93716	3.9302	1.94412					0.0865233	0.09945	0.121109	0.0777911														117.225	121.368	102.737	139.998							5.9694	6.01229	5.41642	6.60816
					2.4773	2.93839	3.93007	1.94671					0.0865965	0.0994984	0.12113	0.0778665														117.737	121.967	103.175	140.759							5.99329	6.03684	5.43618	6.63749
					2.47907	2.93962	3.92994	1.94929					0.0866698	0.0995467	0.121152	0.0779419														118.248	122.566	103.612	141.52							6.01718	6.06139	5.45591	6.66686
					2.48084	2.94084	3.92981	1.95187					0.086743	0.0995951	0.121173	0.0780172														118.76	123.165	104.047	142.283							6.04107	6.08593	5.47561	6.69626
					2.48262	2.94207	3.92969	1.95445					0.0868162	0.0996434	0.121194	0.0780925														119.272	123.764	104.482	143.047							6.06496	6.11048	5.49528	6.72568
					2.48439	2.94329	3.92956	1.95703					0.0868894	0.0996918	0.121216	0.0781676														119.783	124.364	104.916	143.811							6.08884	6.13503	5.51493	6.75514
					2.48616	2.94452	3.92944	1.9596					0.0869626	0.0997402	0.121238	0.0782427														120.295	124.963	105.349	144.577							6.11273	6.15958	5.53454	6.78462
					2.48793	2.94575	3.92932	1.96218					0.0870359	0.0997885	0.121259	0.0783177														120.807	125.562	105.78	145.344							6.13662	6.18413	5.55413	6.81412
					2.48971	2.94697	3.9292	1.96475					0.0871091	0.0998369	0.121281	0.0783927														121.318	126.161	106.211	146.111							6.16051	6.20868	5.5737	6.84365
					2.49148	2.9482	3.92908	1.96732					0.0871823	0.0998852	0.121303	0.0784675														121.83	126.76	106.641	146.879							6.1844	6.23323	5.59324	6.87321
					2.49325	2.94943	3.92897	1.96988					0.0872555	0.0999336	0.121325	0.0785423														122.342	127.36	107.071	147.649							6.20829	6.25777	5.61276	6.90279
					2.49503	2.95065	3.92885	1.97245					0.0873287	0.0999819	0.121347	0.078617														122.853	127.959	107.499	148.419							6.23218	6.28232	5.63225	6.9324
					2.4968	2.95188	3.92874	1.97501					0.0874019	0.10003	0.121369	0.0786917														123.365	128.558	107.927	149.189							6.25606	6.30687	5.65172	6.96203
					2.49857	2.95311	3.92863	1.97758					0.0874752	0.100079	0.121391	0.0787662														123.877	129.157	108.353	149.961							6.27995	6.33142	5.67116	6.99168
					2.50035	2.95433	3.92853	1.98014					0.0875484	0.100127	0.121413	0.0788407														124.388	129.756	108.779	150.734							6.30384	6.35597	5.69059	7.02135
					2.50212	2.95556	3.92842	1.98269					0.0876216	0.100175	0.121436	0.0789151														124.9	130.356	109.204	151.507							6.32773	6.38052	5.70999	7.05105
					2.50389	2.95678	3.92832	1.98525					0.0876948	0.100224	0.121458	0.0789895														125.412	130.955	109.629	152.281							6.35162	6.40507	5.72937	7.08076
					2.50566	2.95801	3.92822	1.9878					0.087768	0.100272	0.12148	0.0790637														125.923	131.554	110.052	153.056							6.37551	6.42961	5.74873	7.1105
					2.50744	2.95924	3.92812	1.99036					0.0878413	0.10032	0.121503	0.0791379														126.435	132.153	110.475	153.831							6.39939	6.45416	5.76807	7.14026
					2.50921	2.96046	3.92802	1.99291					0.0879145	0.100369	0.121525	0.079212														126.947	132.752	110.898	154.607							6.42328	6.47871	5.78738	7.17004
					2.51098	2.96169	3.92793	1.99545					0.0879877	0.100417	0.121548	0.079286														127.458	133.352	111.319	155.384							6.44717	6.50326	5.80668	7.19983
					2.51276	2.96292	3.92783	1.998					0.0880609	0.100465	0.121571	0.07936														127.97	133.951	111.74	156.161							6.47106	6.52781	5.82597	7.22965
					2.51453	2.96414	3.92774	2.00054					0.0881341	0.100514	0.121594	0.0794338														128.482	134.55	112.161	156.939							6.49495	6.55236	5.84523	7.25948
					2.5163	2.96537	3.92765	2.00308					0.0882073	0.100562	0.121617	0.0795076														128.993	135.149	112.58	157.718							6.51884	6.5769	5.86447	7.28934
					2.51808	2.9666	3.92757	2.00562					0.0882806	0.10061	0.12164	0.0795813														129.505	135.748	112.999	158.497							6.54273	6.60145	5.8837	7.31921
					2.51985	2.96782	3.92748	2.00816					0.0883538	0.100659	0.121663	0.0796549														130.017	136.348	113.418	159.277							6.56661	6.626	5.90291	7.3491
					2.52162	2.96905	3.9274	2.0107					0.088427	0.100707	0.121686	0.0797285														130.528	136.947	113.836	160.058							6.5905	6.65055	5.9221	7.379
					2.52339	2.97027	3.92732	2.01323					0.0885002	0.100756	0.121709	0.079802														131.04	137.546	114.253	160.839							6.61439	6.6751	5.94127	7.40892
					2.52517	2.9715	3.92724	2.01576					0.0885734	0.100804	0.121732	0.0798753														131.552	138.145	114.67	161.621							6.63828	6.69965	5.96043	7.43886
					2.52694	2.97273	3.92716	2.01829					0.0886466	0.100852	0.121756	0.0799486														132.063	138.744	115.086	162.403							6.66217	6.7242	5.97958	7.46881
					2.52871	2.97395	3.92709	2.02082					0.0887199	0.100901	0.121779	0.0800219														132.575	139.344	115.502	163.186							6.68606	6.74874	5.9987	7.49878
					2.53049	2.97518	3.92702	2.02334					0.0887931	0.100949	0.121803	0.080095														133.087	139.943	115.917	163.969							6.70994	6.77329	6.01782	7.52877
					2.53226	2.97641	3.92695	2.02587					0.0888663	0.100997	0.121827	0.0801681														133.598	140.542	116.332	164.753							6.73383	6.79784	6.03692	7.55877
					2.53403	2.97763	3.92688	2.02839					0.0889395	0.101046	0.12185	0.0802411														134.11	141.141	116.746	165.537							6.75772	6.82239	6.056	7.58878
					2.53581	2.97886	3.92681	2.0309					0.0890127	0.101094	0.121874	0.080314														134.622	141.74	117.159	166.322							6.78161	6.84694	6.07507	7.61881
					2.53758	2.98009	3.92675	2.03342					0.089086	0.101142	0.121898	0.0803868														135.133	142.34	117.573	167.107							6.8055	6.87149	6.09412	7.64885
					2.53935	2.98131	3.92669	2.03594					0.0891592	0.101191	0.121922	0.0804595														135.645	142.939	117.985	167.892							6.82939	6.89604	6.11316	7.67891
					2.54112	2.98254	3.92663	2.03845					0.0892324	0.101239	0.121946	0.0805322														136.157	143.538	118.398	168.679							6.85327	6.92058	6.13219	7.70898
					2.5429	2.98376	3.92657	2.04096					0.0893056	0.101287	0.12197	0.0806047														136.668	144.137	118.809	169.465							6.87716	6.94513	6.15121	7.73906
					2.54467	2.98499	3.92652	2.04346					0.0893788	0.101336	0.121994	0.0806772														137.18	144.736	119.221	170.252							6.90105	6.96968	6.17021	7.76915
					2.54644	2.98622	3.92646	2.04597					0.089452	0.101384	0.122019	0.0807496														137.692	145.336	119.632	171.04							6.92494	6.99423	6.1892	7.79926
					2.54822	2.98744	3.92641	2.04847					0.0895253	0.101432	0.122043	0.0808219														138.203	145.935	120.042	171.827							6.94883	7.01878	6.20817	7.82938
					2.54999	2.98867	3.92636	2.05097					0.0895985	0.101481	0.122067	0.0808942														138.715	146.534	120.453	172.616							6.97272	7.04333	6.22714	7.85951
					2.55176	2.9899	3.92632	2.05347					0.0896717	0.101529	0.122092	0.0809663														139.227	147.133	120.862	173.404							6.99661	7.06787	6.24609	7.88966
					2.55353	2.99112	3.92628	2.05597					0.0897449	0.101578	0.122117	0.0810384														139.738	147.733	121.272	174.193							7.02049	7.09242	6.26503	7.91981
					2.55531	2.99235	3.92623	2.05846					0.0898181	0.101626	0.122141	0.0811104														140.25	148.332	121.681	174.983							7.04438	7.11697	6.28396	7.94998
					2.55708	2.99358	3.92619	2.06096					0.0898913	0.101674	0.122166	0.0811822														140.762	148.931	122.089	175.773							7.06827	7.14152	6.30288	7.98016
					2.55885	2.9948	3.92616	2.06345					0.0899646	0.101723	0.122191	0.0812541														141.273	149.53	122.497	176.563							7.09216	7.16607	6.32179	8.01035
					2.56063	2.99603	3.92612	2.06593					0.0900378	0.101771	0.122216	0.0813258														141.785	150.129	122.905	177.353							7.11605	7.19062	6.34069	8.04055
					2.5624	2.99725	3.92609	2.06842					0.090111	0.101819	0.122241	0.0813974														142.297	150.729	123.313	178.144							7.13994	7.21517	6.35958	8.07076
					2.56417	2.99848	3.92606	2.0709					0.0901842	0.101868	0.122266	0.081469														142.808	151.328	123.72	178.935							7.16382	7.23971	6.37845	8.10098
					2.56595	2.99971	3.92603	2.07338					0.0902574	0.101916	0.122292	0.0815404														143.32	151.927	124.127	179.727							7.18771	7.26426	6.39732	8.13121
					2.56772	3.00093	3.92601	2.07586					0.0903307	0.101964	0.122317	0.0816118														143.832	152.526	124.534	180.519							7.2116	7.28881	6.41618	8.16145
					2.56949	3.00216	3.92598	2.07834					0.0904039	0.102013	0.122342	0.0816831														144.343	153.125	124.94	181.311							7.23549	7.31336	6.43502	8.1917
					2.57126	3.00339	3.92596	2.08081					0.0904771	0.102061	0.122368	0.0817543														144.855	153.725	125.346	182.103							7.25938	7.33791	6.45386	8.22196
					2.57304	3.00461	3.92594	2.08328					0.0905503	0.102109	0.122393	0.0818254														145.367	154.324	125.751	182.896							7.28327	7.36246	6.47269	8.25222
					2.57481	3.00584	3.92593	2.08575					0.0906235	0.102158	0.122419	0.0818964														145.878	154.923	126.156	183.689							7.30716	7.38701	6.49151	8.2825
					2.57658	3.00707	3.92591	2.08822					0.0906967	0.102206	0.122445	0.0819673														146.39	155.522	126.561	184.483							7.33104	7.41155	6.51032	8.31279
					2.57836	3.00829	3.9259	2.09068					0.09077	0.102254	0.122471	0.0820382
					2.58013	3.00952	3.92589	2.09314					0.0908432	0.102303	0.122497	0.0821089
					2.5819	3.01074	3.92589	2.0956					0.0909164	0.102351	0.122523	0.0821796
					2.58368	3.01197	3.92588	2.09806					0.0909896	0.1024	0.122549	0.0822502
					2.58545	3.0132	3.92588	2.10052					0.0910628	0.102448	0.122575	0.0823206
					2.58722	3.01442	3.92588	2.10297					0.0911361	0.102496	0.122601	0.082391
					2.58899	3.01565	3.92588	2.10542					0.0912093	0.102545	0.122628	0.0824613
					2.59077	3.01688	3.92589	2.10787					0.0912825	0.102593	0.122654	0.0825315
					2.59254	3.0181	3.92589	2.11031					0.0913557	0.102641	0.122681	0.0826017
					2.59431	3.01933	3.92591	2.11275					0.0914289	0.10269	0.122708	0.0826717
					2.59609	3.02056	3.92592	2.11519					0.0915021	0.102738	0.122734	0.0827416
					2.59786	3.02178	3.92593	2.11763					0.0915754	0.102786	0.122761	0.0828115
					2.59963	3.02301	3.92595	2.12007					0.0916486	0.102835	0.122788	0.0828812
					2.60141	3.02423	3.92597	2.1225					0.0917218	0.102883	0.122815	0.0829509
					2.60318	3.02546	3.92599	2.12493					0.091795	0.102931	0.122842	0.0830204
					2.60495	3.02669	3.92602	2.12736					0.0918682	0.10298	0.12287	0.0830899
					2.60672	3.02791	3.92605	2.12978					0.0919414	0.103028	0.122897	0.0831593
					2.6085	3.02914	3.92608	2.1322					0.0920147	0.103076	0.122924	0.0832285
					2.61027	3.03037	3.92611	2.13462					0.0920879	0.103125	0.122952	0.0832977
					2.61204	3.03159	3.92614	2.13704					0.0921611	0.103173	0.122979	0.0833668
					2.61382	3.03282	3.92618	2.13946					0.0922343	0.103221	0.123007	0.0834358
					2.61559	3.03405	3.92622	2.14187					0.0923075	0.10327	0.123035	0.0835047
					2.61736	3.03527	3.92627	2.14428					0.0923808	0.103318	0.123063	0.0835735
					2.61914	3.0365	3.92631	2.14669					0.092454	0.103367	0.123091	0.0836422
					2.62091	3.03772	3.92636	2.14909					0.0925272	0.103415	0.123119	0.0837108
					2.62268	3.03895	3.92641	2.15149					0.0926004	0.103463	0.123147	0.0837794
					2.62445	3.04018	3.92646	2.15389					0.0926736	0.103512	0.123175	0.0838478
					2.62623	3.0414	3.92652	2.15629					0.0927468	0.10356	0.123204	0.0839161
					2.628	3.04263	3.92658	2.15868					0.0928201	0.103608	0.123232	0.0839843
					2.62977	3.04386	3.92664	2.16107					0.0928933	0.103657	0.123261	0.0840525
					2.63155	3.04508	3.9267	2.16346					0.0929665	0.103705	0.12329	0.0841205
					2.63332	3.04631	3.92677	2.16585					0.0930397	0.103753	0.123318	0.0841884
					2.63509	3.04754	3.92684	2.16823					0.0931129	0.103802	0.123347	0.0842562
					2.63687	3.04876	3.92691	2.17061					0.0931862	0.10385	0.123376	0.084324
					2.63864	3.04999	3.92699	2.17299					0.0932594	0.103898	0.123405	0.0843916
					2.64041	3.05121	3.92706	2.17536					0.0933326	0.103947	0.123434	0.0844591
					2.64218	3.05244	3.92714	2.17774					0.0934058	0.103995	0.123464	0.0845266
					2.64396	3.05367	3.92723	2.18011					0.093479	0.104043	0.123493	0.0845939
					2.64573	3.05489	3.92731	2.18247					0.0935522	0.104092	0.123522	0.0846612
					2.6475	3.05612	3.9274	2.18484					0.0936255	0.10414	0.123552	0.0847283
					2.64928	3.05735	3.92749	2.1872					0.0936987	0.104189	0.123582	0.0847953
					2.65105	3.05857	3.92759	2.18956					0.0937719	0.104237	0.123612	0.0848622
					2.65282	3.0598	3.92768	2.19191					0.0938451	0.104285	0.123641	0.0849291
					2.65459	3.06103	3.92778	2.19427					0.0939183	0.104334	0.123671	0.0849958
					2.65637	3.06225	3.92789	2.19662					0.0939915	0.104382	0.123701	0.0850624
					2.65814	3.06348	3.92799	2.19896					0.0940648	0.10443	0.123732	0.085129
					2.65991	3.0647	3.9281	2.20131					0.094138	0.104479	0.123762	0.0851954
					2.66169	3.06593	3.92821	2.20365					0.0942112	0.104527	0.123792	0.0852617
					2.66346	3.06716	3.92832	2.20599					0.0942844	0.104575	0.123823	0.0853279
					2.66523	3.06838	3.92844	2.20833					0.0943576	0.104624	0.123853	0.085394
					2.66701	3.06961	3.92856	2.21066					0.0944309	0.104672	0.123884	0.08546
					2.66878	3.07084	3.92868	2.21299					0.0945041	0.10472	0.123915	0.0855259
					2.67055	3.07206	3.92881	2.21532					0.0945773	0.104769	0.123946	0.0855917
					2.67232	3.07329	3.92894	2.21764					0.0946505	0.104817	0.123977	0.0856574
					2.6741	3.07452	3.92907	2.21996					0.0947237	0.104865	0.124008	0.085723
					2.67587	3.07574	3.9292	2.22228					0.0947969	0.104914	0.124039	0.0857885
					2.67764	3.07697	3.92934	2.2246					0.0948702	0.104962	0.12407	0.0858539
					2.67942	3.07819	3.92948	2.22691					0.0949434	0.105011	0.124102	0.0859191
					2.68119	3.07942	3.92962	2.22922					0.0950166	0.105059	0.124133	0.0859843
					2.68296	3.08065	3.92977	2.23152					0.0950898	0.105107	0.124165	0.0860493
					2.68474	3.08187	3.92992	2.23383					0.095163	0.105156	0.124197	0.0861143
					2.68651	3.0831	3.93007	2.23613					0.0952363	0.105204	0.124229	0.0861791
					2.68828	3.08433	3.93023	2.23843					0.0953095	0.105252	0.124261	0.0862439
					2.69005	3.08555	3.93038	2.24072					0.0953827	0.105301	0.124293	0.0863085
					2.69183	3.08678	3.93055	2.24301					0.0954559	0.105349	0.124325	0.086373
					2.6936	3.08801	3.93071	2.2453					0.0955291	0.105397	0.124357	0.0864374
					2.69537	3.08923	3.93088	2.24759					0.0956023	0.105446	0.12439	0.0865017
					2.69715	3.09046	3.93105	2.24987					0.0956756	0.105494	0.124422	0.0865659
					2.69892	3.09168	3.93122	2.25215					0.0957488	0.105542	0.124455	0.08663
					2.70069	3.09291	3.9314	2.25442					0.095822	0.105591	0.124487	0.086694
					2.70247	3.09414	3.93158	2.2567					0.0958952	0.105639	0.12452	0.0867579
					2.70424	3.09536	3.93176	2.25897					0.0959684	0.105687	0.124553	0.0868216
					2.70601	3.09659	3.93195	2.26123					0.0960416	0.105736	0.124586	0.0868853
					2.70778	3.09782	3.93214	2.2635					0.0961149	0.105784	0.124619	0.0869488
					2.70956	3.09904	3.93233	2.26576					0.0961881	0.105832	0.124653	0.0870122
					2.71133	3.10027	3.93252	2.26801					0.0962613	0.105881	0.124686	0.0870756
					2.7131	3.1015	3.93272	2.27027					0.0963345	0.105929	0.12472	0.0871388
					2.71488	3.10272	3.93293	2.27252					0.0964077	0.105978	0.124753	0.0872019
					2.71665	3.10395	3.93313	2.27477					0.096481	0.106026	0.124787	0.0872648
					2.71842	3.10517	3.93334	2.27701					0.0965542	0.106074	0.124821	0.0873277
					2.7202	3.1064	3.93355	2.27925					0.0966274	0.106123	0.124855	0.0873905
					2.72197	3.10763	3.93376	2.28149					0.0967006	0.106171	0.124889	0.0874531
					2.72374	3.10885	3.93398	2.28372					0.0967738	0.106219	0.124923	0.0875157
					2.72551	3.11008	3.9342	2.28596					0.096847	0.106268	0.124957	0.0875781
					2.72729	3.11131	3.93443	2.28818					0.0969203	0.106316	0.124992	0.0876404
					2.72906	3.11253	3.93466	2.29041					0.0969935	0.106364	0.125026	0.0877026
					2.73083	3.11376	3.93489	2.29263					0.0970667	0.106413	0.125061	0.0877647
					2.73261	3.11499	3.93512	2.29485					0.0971399	0.106461	0.125096	0.0878266
					2.73438	3.11621	3.93536	2.29706					0.0972131	0.106509	0.12513	0.0878885
					2.73615	3.11744	3.9356	2.29927					0.0972863	0.106558	0.125165	0.0879502
					2.73793	3.11866	3.93585	2.30148					0.0973596	0.106606	0.1252	0.0880118
					2.7397	3.11989	3.93609	2.30369					0.0974328	0.106654	0.125236	0.0880733
					2.74147	3.12112	3.93635	2.30589					0.097506	0.106703	0.125271	0.0881347
					2.74324	3.12234	3.9366	2.30809					0.0975792	0.106751	0.125306	0.088196
					2.74502	3.12357	3.93686	2.31028					0.0976524	0.1068	0.125342	0.0882572
					2.74679	3.1248	3.93712	2.31247					0.0977257	0.106848	0.125378	0.0883182
					2.74856	3.12602	3.93738	2.31466					0.0977989	0.106896	0.125413	0.0883791
					2.75034	3.12725	3.93765	2.31684					0.0978721	0.106945	0.125449	0.08844
					2.75211	3.12848	3.93793	2.31903					0.0979453	0.106993	0.125485	0.0885007
					2.75388	3.1297	3.9382	2.3212					0.0980185	0.107041	0.125521	0.0885612
					2.75565	3.13093	3.93848	2.32338					0.0980917	0.10709	0.125558	0.0886217
					2.75743	3.13215	3.93876	2.32555					0.098165	0.107138	0.125594	0.088682
					2.7592	3.13338	3.93905	2.32771					0.0982382	0.107186	0.12563	0.0887423
					2.76097	3.13461	3.93934	2.32988					0.0983114	0.107235	0.125667	0.0888024
					2.76275	3.13583	3.93963	2.33204					0.0983846	0.107283	0.125704	0.0888624
					2.76452	3.13706	3.93993	2.33419					0.0984578	0.107331	0.125741	0.0889222
					2.76629	3.13829	3.94023	2.33635					0.0985311	0.10738	0.125778	0.088982
					2.76807	3.13951	3.94053	2.3385					0.0986043	0.107428	0.125815	0.0890416
					2.76984	3.14074	3.94084	2.34064					0.0986775	0.107476	0.125852	0.0891012
					2.77161	3.14197	3.94115	2.34278					0.0987507	0.107525	0.125889	0.0891606
					2.77338	3.14319	3.94146	2.34492					0.0988239	0.107573	0.125926	0.0892198
					2.77516	3.14442	3.94178	2.34706					0.0988971	0.107622	0.125964	0.089279
					2.77693	3.14564	3.9421	2.34919					0.0989704	0.10767	0.126002	0.089338
					2.7787	3.14687	3.94242	2.35132					0.0990436	0.107718	0.126039	0.089397
					2.78048	3.1481	3.94275	2.35344					0.0991168	0.107767	0.126077	0.0894558
					2.78225	3.14932	3.94309	2.35556					0.09919	0.107815	0.126115	0.0895144
					2.78402	3.15055	3.94342	2.35768					0.0992632	0.107863	0.126154	0.089573
					2.7858	3.15178	3.94376	2.35979					0.0993364	0.107912	0.126192	0.0896314
					2.78757	3.153	3.94411	2.3619					0.0994097	0.10796	0.12623	0.0896898
					2.78934	3.15423	3.94445	2.36401					0.0994829	0.108008	0.126269	0.0897479
					2.79111	3.15546	3.9448	2.36611					0.0995561	0.108057	0.126307	0.089806
					2.79289	3.15668	3.94516	2.36821					0.0996293	0.108105	0.126346	0.089864
					2.79466	3.15791	3.94552	2.3703					0.0997025	0.108153	0.126385	0.0899218
					2.79643	3.15913	3.94588	2.37239					0.0997758	0.108202	0.126424	0.0899795
					2.79821	3.16036	3.94624	2.37448					0.099849	0.10825	0.126463	0.0900371
					2.79998	3.16159	3.94661	2.37656					0.0999222	0.108298	0.126502	0.0900946
					2.80175	3.16281	3.94699	2.37864					0.0999954	0.108347	0.126542	0.0901519
					2.80353	3.16404	3.94736	2.38072					0.100069	0.108395	0.126581	0.0902091
					2.8053	3.16527	3.94775	2.38279					0.100142	0.108443	0.126621	0.0902662
					2.80707	3.16649	3.94813	2.38485					0.100215	0.108492	0.126661	0.0903232
					2.80884	3.16772	3.94852	2.38692					0.100288	0.10854	0.1267	0.0903801
					2.81062	3.16895	3.94891	2.38898					0.100361	0.108589	0.12674	0.0904368
					2.81239	3.17017	3.94931	2.39104					0.100435	0.108637	0.12678	0.0904934
					2.81416	3.1714	3.94971	2.39309					0.100508	0.108685	0.126821	0.0905499
					2.81594	3.17262	3.95011	2.39514					0.100581	0.108734	0.126861	0.0906062
					2.81771	3.17385	3.95052	2.39718					0.100654	0.108782	0.126901	0.0906625
					2.81948	3.17508	3.95093	2.39922					0.100728	0.10883	0.126942	0.0907186
					2.82126	3.1763	3.95135	2.40126					0.100801	0.108879	0.126983	0.0907745
					2.82303	3.17753	3.95177	2.40329					0.100874	0.108927	0.127024	0.0908304
					2.8248	3.17876	3.95219	2.40532					0.100947	0.108975	0.127065	0.0908861
					2.82657	3.17998	3.95262	2.40734					0.10102	0.109024	0.127106	0.0909417
					2.82835	3.18121	3.95305	2.40937					0.101094	0.109072	0.127147	0.0909972
					2.83012	3.18244	3.95349	2.41138					0.101167	0.10912	0.127188	0.0910526
					2.83189	3.18366	3.95393	2.4134					0.10124	0.109169	0.12723	0.0911078
					2.83367	3.18489	3.95437	2.4154					0.101313	0.109217	0.127271	0.0911629
					2.83544	3.18611	3.95482	2.41741					0.101387	0.109265	0.127313	0.0912179
					2.83721	3.18734	3.95527	2.41941					0.10146	0.109314	0.127355	0.0912728
					2.83899	3.18857	3.95573	2.42141					0.101533	0.109362	0.127397	0.0913275
					2.84076	3.18979	3.95619	2.4234					0.101606	0.109411	0.127439	0.0913821
					2.84253	3.19102	3.95665	2.42539					0.101679	0.109459	0.127481	0.0914366
					2.8443	3.19225	3.95712	2.42737					0.101753	0.109507	0.127524	0.0914909
					2.84608	3.19347	3.95759	2.42935					0.101826	0.109556	0.127566	0.0915452
					2.84785	3.1947	3.95807	2.43133					0.101899	0.109604	0.127609	0.0915993
					2.84962	3.19593	3.95855	2.4333					0.101972	0.109652	0.127651	0.0916532
					2.8514	3.19715	3.95903	2.43527					0.102046	0.109701	0.127694	0.0917071
					2.85317	3.19838	3.95952	2.43723					0.102119	0.109749	0.127737	0.0917608
					2.85494	3.1996	3.96002	2.43919					0.102192	0.109797	0.12778	0.0918144
					2.85671	3.20083	3.96051	2.44115					0.102265	0.109846	0.127824	0.0918679
					2.85849	3.20206	3.96101	2.4431					0.102338	0.109894	0.127867	0.0919212
					2.86026	3.20328	3.96152	2.44505					0.102412	0.109942	0.12791	0.0919744
					2.86203	3.20451	3.96203	2.44699					0.102485	0.109991	0.127954	0.0920275
					2.86381	3.20574	3.96254	2.44893					0.102558	0.110039	0.127998	0.0920805
					2.86558	3.20696	3.96306	2.45086					0.102631	0.110087	0.128042	0.0921333
					2.86735	3.20819	3.96358	2.45279					0.102704	0.110136	0.128086	0.092186
					2.86913	3.20942	3.96411	2.45472					0.102778	0.110184	0.12813	0.0922386
					2.8709	3.21064	3.96464	2.45664					0.102851	0.110233	0.128174	0.092291
					2.87267	3.21187	3.96518	2.45856					0.102924	0.110281	0.128218	0.0923433
					2.87444	3.21309	3.96572	2.46047					0.102997	0.110329	0.128263	0.0923955
					2.87622	3.21432	3.96626	2.46238					0.103071	0.110378	0.128308	0.0924476
					2.87799	3.21555	3.96681	2.46428					0.103144	0.110426	0.128352	0.0924995
					2.87976	3.21677	3.96736	2.46618					0.103217	0.110474	0.128397	0.0925513
					2.88154	3.218	3.96792	2.46808					0.10329	0.110523	0.128442	0.092603
					2.88331	3.21923	3.96848	2.46997					0.103363	0.110571	0.128487	0.0926546
					2.88508	3.22045	3.96905	2.47186					0.103437	0.110619	0.128533	0.092706
					2.88686	3.22168	3.96962	2.47374					0.10351	0.110668	0.128578	0.0927573
					2.88863	3.22291	3.97019	2.47562					0.103583	0.110716	0.128624	0.0928084
					2.8904	3.22413	3.97077	2.47749					0.103656	0.110764	0.128669	0.0928595
					2.89217	3.22536	3.97135	2.47936					0.10373	0.110813	0.128715	0.0929104
					2.89395	3.22658	3.97194	2.48123					0.103803	0.110861	0.128761	0.0929612
					2.89572	3.22781	3.97253	2.48309					0.103876	0.110909	0.128807	0.0930118
					2.89749	3.22904	3.97313	2.48495					0.103949	0.110958	0.128853	0.0930623
					2.89927	3.23026	3.97373	2.4868					0.104022	0.111006	0.1289	0.0931127
					2.90104	3.23149	3.97433	2.48864					0.104096	0.111055	0.128946	0.093163
					2.90281	3.23272	3.97494	2.49049					0.104169	0.111103	0.128993	0.0932131
					2.90459	3.23394	3.97556	2.49233					0.104242	0.111151	0.129039	0.0932631
					2.90636	3.23517	3.97618	2.49416					0.104315	0.1112	0.129086	0.093313
					2.90813	3.2364	3.9768	2.49599					0.104388	0.111248	0.129133	0.0933627
					2.9099	3.23762	3.97743	2.49781					0.104462	0.111296	0.12918	0.0934123
					2.91168	3.23885	3.97806	2.49963					0.104535	0.111345	0.129227	0.0934618
					2.91345	3.24007	3.9787	2.50145					0.104608	0.111393	0.129275	0.0935112
					2.91522	3.2413	3.97934	2.50326					0.104681	0.111441	0.129322	0.0935604
					2.917	3.24253	3.97999	2.50507					0.104755	0.11149	0.12937	0.0936095
					2.91877	3.24375	3.98064	2.50687					0.104828	0.111538	0.129418	0.0936585
					2.92054	3.24498	3.98129	2.50867					0.104901	0.111586	0.129465	0.0937073
					2.92232	3.24621	3.98195	2.51046					0.104974	0.111635	0.129513	0.093756
					2.92409	3.24743	3.98262	2.51225					0.105047	0.111683	0.129562	0.0938046
					2.92586	3.24866	3.98329	2.51403					0.105121	0.111731	0.12961	0.0938531
					2.92763	3.24989	3.98396	2.51581					0.105194	0.11178	0.129658	0.0939014
					2.92941	3.25111	3.98464	2.51758					0.105267	0.111828	0.129707	0.0939496
					2.93118	3.25234	3.98532	2.51935					0.10534	0.111876	0.129755	0.0939977
					2.93295	3.25356	3.98601	2.52112					0.105414	0.111925	0.129804	0.0940456
					2.93473	3.25479	3.9867	2.52288					0.105487	0.111973	0.129853	0.0940934
					2.9365	3.25602	3.9874	2.52464					0.10556	0.112022	0.129902	0.0941411
					2.93827	3.25724	3.9881	2.52639					0.105633	0.11207	0.129951	0.0941886
					2.94005	3.25847	3.98881	2.52813					0.105706	0.112118	0.13	0.094236
					2.94182	3.2597	3.98952	2.52987					0.10578	0.112167	0.13005	0.0942833
					2.94359	3.26092	3.99023	2.53161					0.105853	0.112215	0.130099	0.0943305
					2.94536	3.26215	3.99095	2.53334					0.105926	0.112263	0.130149	0.0943775
					2.94714	3.26338	3.99168	2.53507					0.105999	0.112312	0.130199	0.0944244
					2.94891	3.2646	3.99241	2.53679					0.106072	0.11236	0.130249	0.0944712
					2.95068	3.26583	3.99315	2.53851					0.106146	0.112408	0.130299	0.0945178
					2.95246	3.26705	3.99388	2.54022					0.106219	0.112457	0.130349	0.0945643
					2.95423	3.26828	3.99463	2.54193					0.106292	0.112505	0.130399	0.0946107
					2.956	3.26951	3.99538	2.54364					0.106365	0.112553	0.13045	0.094657
					2.95777	3.27073	3.99613	2.54533					0.106439	0.112602	0.1305	0.0947031
					2.95955	3.27196	3.99689	2.54703					0.106512	0.11265	0.130551	0.0947491
					2.96132	3.27319	3.99766	2.54872					0.106585	0.112698	0.130602	0.094795
					2.96309	3.27441	3.99842	2.5504					0.106658	0.112747	0.130653	0.0948407
					2.96487	3.27564	3.9992	2.55208					0.106731	0.112795	0.130704	0.0948863
					2.96664	3.27687	3.99998	2.55375					0.106805	0.112844	0.130755	0.0949318
					2.96841	3.27809	4.00076	2.55542					0.106878	0.112892	0.130807	0.0949772
					2.97019	3.27932	4.00155	2.55709					0.106951	0.11294	0.130858	0.0950224
					2.97196	3.28054	4.00234	2.55875					0.107024	0.112989	0.13091	0.0950675
					2.97373	3.28177	4.00314	2.5604					0.107098	0.113037	0.130961	0.0951125
					2.9755	3.283	4.00394	2.56205					0.107171	0.113085	0.131013	0.0951573
					2.97728	3.28422	4.00475	2.5637					0.107244	0.113134	0.131065	0.095202
					2.97905	3.28545	4.00556	2.56534					0.107317	0.113182	0.131117	0.0952466
					2.98082	3.28668	4.00638	2.56698					0.10739	0.11323	0.13117	0.0952911
					2.9826	3.2879	4.0072	2.56861					0.107464	0.113279	0.131222	0.0953354
					2.98437	3.28913	4.00803	2.57023					0.107537	0.113327	0.131274	0.0953796
					2.98614	3.29036	4.00886	2.57185					0.10761	0.113375	0.131327	0.0954237
					2.98792	3.29158	4.0097	2.57347					0.107683	0.113424	0.13138	0.0954676
					2.98969	3.29281	4.01054	2.57508					0.107756	0.113472	0.131433	0.0955114
					2.99146	3.29403	4.01138	2.57668					0.10783	0.11352	0.131486	0.0955551
					2.99323	3.29526	4.01224	2.57828					0.107903	0.113569	0.131539	0.0955987
					2.99501	3.29649	4.01309	2.57988					0.107976	0.113617	0.131592	0.0956421
					2.99678	3.29771	4.01395	2.58147					0.108049	0.113666	0.131646	0.0956854
					2.99855	3.29894	4.01482	2.58306					0.108123	0.113714	0.131699	0.0957286
					3.00033	3.30017	4.01569	2.58464					0.108196	0.113762	0.131753	0.0957717
					3.0021	3.30139	4.01657	2.58621					0.108269	0.113811	0.131807	0.0958146
					3.00387	3.30262	4.01745	2.58778					0.108342	0.113859	0.13186	0.0958574
					3.00565	3.30385	4.01834	2.58935					0.108415	0.113907	0.131914	0.0959001
					3.00742	3.30507	4.01923	2.59091					0.108489	0.113956	0.131969	0.0959426
					3.00919	3.3063	4.02013	2.59247					0.108562	0.114004	0.132023	0.095985
					3.01096	3.30752	4.02103	2.59402					0.108635	0.114052	0.132077	0.0960273
					3.01274	3.30875	4.02194	2.59556					0.108708	0.114101	0.132132	0.0960695
					3.01451	3.30998	4.02285	2.5971					0.108782	0.114149	0.132187	0.0961115
					3.01628	3.3112	4.02377	2.59864					0.108855	0.114197	0.132241	0.0961535
					3.01806	3.31243	4.02469	2.60017					0.108928	0.114246	0.132296	0.0961952
					3.01983	3.31366	4.02562	2.60169					0.109001	0.114294	0.132351	0.0962369
					3.0216	3.31488	4.02655	2.60321					0.109074	0.114342	0.132406	0.0962785
					3.02338	3.31611	4.02749	2.60473					0.109148	0.114391	0.132462	0.0963199
					3.02515	3.31734	4.02843	2.60624					0.109221	0.114439	0.132517	0.0963612
					3.02692	3.31856	4.02938	2.60774					0.109294	0.114487	0.132573	0.0964023
					3.02869	3.31979	4.03033	2.60924					0.109367	0.114536	0.132628	0.0964434
					3.03047	3.32101	4.03129	2.61074					0.109441	0.114584	0.132684	0.0964843
					3.03224	3.32224	4.03225	2.61223					0.109514	0.114633	0.13274	0.0965251
					3.03401	3.32347	4.03322	2.61371					0.109587	0.114681	0.132796	0.0965657
					3.03579	3.32469	4.03419	2.61519					0.10966	0.114729	0.132852	0.0966063
					3.03756	3.32592	4.03517	2.61667					0.109733	0.114778	0.132909	0.0966467
					3.03933	3.32715	4.03616	2.61814					0.109807	0.114826	0.132965	0.096687
					3.04111	3.32837	4.03715	2.6196					0.10988	0.114874	0.133021	0.0967271
					3.04288	3.3296	4.03814	2.62106					0.109953	0.114923	0.133078	0.0967672
					3.04465	3.33083	4.03914	2.62251					0.110026	0.114971	0.133135	0.0968071
					3.04642	3.33205	4.04014	2.62396					0.110099	0.115019	0.133192	0.0968469
					3.0482	3.33328	4.04115	2.6254					0.110173	0.115068	0.133249	0.0968866
					3.04997	3.3345	4.04217	2.62684					0.110246	0.115116	0.133306	0.0969261
					3.05174	3.33573	4.04319	2.62827					0.110319	0.115164	0.133363	0.0969656
					3.05352	3.33696	4.04421	2.6297					0.110392	0.115213	0.133421	0.0970049
					3.05529	3.33818	4.04524	2.63112					0.110466	0.115261	0.133478	0.0970441
					3.05706	3.33941	4.04628	2.63254					0.110539	0.115309	0.133536	0.0970831
					3.05883	3.34064	4.04732	2.63395					0.110612	0.115358	0.133594	0.0971221
					3.06061	3.34186	4.04836	2.63536					0.110685	0.115406	0.133651	0.0971609
					3.06238	3.34309	4.04942	2.63676					0.110758	0.115455	0.133709	0.0971996
					3.06415	3.34432	4.05047	2.63816					0.110832	0.115503	0.133768	0.0972382
					3.06593	3.34554	4.05153	2.63955					0.110905	0.115551	0.133826	0.0972766
					3.0677	3.34677	4.0526	2.64094					0.110978	0.1156	0.133884	0.0973149
					3.06947	3.34799	4.05367	2.64232					0.111051	0.115648	0.133943	0.0973532
					3.07125	3.34922	4.05475	2.64369					0.111125	0.115696	0.134001	0.0973912
					3.07302	3.35045	4.05583	2.64506					0.111198	0.115745	0.13406	0.0974292
					3.07479	3.35167	4.05692	2.64643					0.111271	0.115793	0.134119	0.0974671
					3.07656	3.3529	4.05801	2.64779					0.111344	0.115841	0.134178	0.0975048
					3.07834	3.35413	4.05911	2.64914					0.111417	0.11589	0.134237	0.0975424
					3.08011	3.35535	4.06021	2.65049					0.111491	0.115938	0.134296	0.0975799
					3.08188	3.35658	4.06132	2.65183					0.111564	0.115986	0.134356	0.0976173
					3.08366	3.35781	4.06244	2.65317					0.111637	0.116035	0.134415	0.0976545
					3.08543	3.35903	4.06356	2.65451					0.11171	0.116083	0.134475	0.0976917
					3.0872	3.36026	4.06468	2.65584					0.111783	0.116131	0.134534	0.0977287
					3.08898	3.36148	4.06581	2.65716					0.111857	0.11618	0.134594	0.0977656
					3.09075	3.36271	4.06694	2.65848					0.11193	0.116228	0.134654	0.0978023
					3.09252	3.36394	4.06808	2.65979					0.112003	0.116277	0.134714	0.097839
					3.09429	3.36516	4.06923	2.6611					0.112076	0.116325	0.134774	0.0978755
					3.09607	3.36639	4.07038	2.6624					0.11215	0.116373	0.134834	0.097912
					3.09784	3.36762	4.07154	2.6637					0.112223	0.116422	0.134895	0.0979483
					3.09961	3.36884	4.0727	2.66499					0.112296	0.11647	0.134955	0.0979845
					3.10139	3.37007	4.07386	2.66627					0.112369	0.116518	0.135016	0.0980205
					3.10316	3.3713	4.07504	2.66755					0.112442	0.116567	0.135077	0.0980565
					3.10493	3.37252	4.07621	2.66883					0.112516	0.116615	0.135138	0.0980923
					3.10671	3.37375	4.07739	2.6701					0.112589	0.116663	0.135199	0.0981281
					3.10848	3.37497	4.07858	2.67137					0.112662	0.116712	0.13526	0.0981637
					3.11025	3.3762	4.07977	2.67263					0.112735	0.11676	0.135321	0.0981992
					3.11202	3.37743	4.08097	2.67388					0.112809	0.116808	0.135382	0.0982345
					3.1138	3.37865	4.08218	2.67513					0.112882	0.116857	0.135444	0.0982698
					3.11557	3.37988	4.08338	2.67637					0.112955	0.116905	0.135505	0.0983049
					3.11734	3.38111	4.0846	2.67761					0.113028	0.116953	0.135567	0.09834
					3.11912	3.38233	4.08582	2.67885					0.113101	0.117002	0.135629	0.0983749
					3.12089	3.38356	4.08704	2.68008					0.113175	0.11705	0.135691	0.0984097
					3.12266	3.38479	4.08827	2.6813					0.113248	0.117098	0.135753	0.0984444
					3.12444	3.38601	4.08951	2.68252					0.113321	0.117147	0.135815	0.0984789
					3.12621	3.38724	4.09075	2.68373					0.113394	0.117195	0.135877	0.0985134
					3.12798	3.38846	4.09199	2.68494					0.113467	0.117244	0.135939	0.0985477
					3.12975	3.38969	4.09324	2.68614					0.113541	0.117292	0.136002	0.098582
					3.13153	3.39092	4.0945	2.68733					0.113614	0.11734	0.136064	0.0986161
					3.1333	3.39214	4.09576	2.68853					0.113687	0.117389	0.136127	0.0986501
					3.13507	3.39337	4.09703	2.68971					0.11376	0.117437	0.13619	0.098684
					3.13685	3.3946	4.0983	2.69089					0.113834	0.117485	0.136253	0.0987178
					3.13862	3.39582	4.09958	2.69207					0.113907	0.117534	0.136316	0.0987515
					3.14039	3.39705	4.10086	2.69324					0.11398	0.117582	0.136379	0.098785
					3.14217	3.39828	4.10215	2.6944					0.114053	0.11763	0.136442	0.0988185
					3.14394	3.3995	4.10344	2.69556					0.114126	0.117679	0.136506	0.0988518
					3.14571	3.40073	4.10474	2.69672					0.1142	0.117727	0.136569	0.098885
					3.14748	3.40195	4.10604	2.69787					0.114273	0.117775	0.136633	0.0989182
					3.14926	3.40318	4.10735	2.69901					0.114346	0.117824	0.136696	0.0989512
					3.15103	3.40441	4.10866	2.70015					0.114419	0.117872	0.13676	0.0989841
					3.1528	3.40563	4.10998	2.70128					0.114493	0.11792	0.136824	0.0990168
					3.15458	3.40686	4.11131	2.70241					0.114566	0.117969	0.136888	0.0990495
					3.15635	3.40809	4.11264	2.70353					0.114639	0.118017	0.136952	0.0990821
					3.15812	3.40931	4.11397	2.70465					0.114712	0.118066	0.137017	0.0991145
					3.1599	3.41054	4.11531	2.70576					0.114785	0.118114	0.137081	0.0991469
					3.16167	3.41177	4.11666	2.70687					0.114859	0.118162	0.137145	0.0991791
					3.16344	3.41299	4.11801	2.70797					0.114932	0.118211	0.13721	0.0992113
					3.16521	3.41422	4.11936	2.70907					0.115005	0.118259	0.137275	0.0992433
					3.16699	3.41544	4.12073	2.71016					0.115078	0.118307	0.137339	0.0992752
					3.16876	3.41667	4.12209	2.71125					0.115151	0.118356	0.137404	0.099307
					3.17053	3.4179	4.12346	2.71233					0.115225	0.118404	0.137469	0.0993387
					3.17231	3.41912	4.12484	2.71341					0.115298	0.118452	0.137534	0.0993703
					3.17408	3.42035	4.12622	2.71448					0.115371	0.118501	0.1376	0.0994018
					3.17585	3.42158	4.12761	2.71554					0.115444	0.118549	0.137665	0.0994332
					3.17762	3.4228	4.129	2.7166					0.115518	0.118597	0.13773	0.0994645
					3.1794	3.42403	4.1304	2.71766					0.115591	0.118646	0.137796	0.0994957
					3.18117	3.42526	4.1318	2.71871					0.115664	0.118694	0.137861	0.0995267
					3.18294	3.42648	4.13321	2.71975					0.115737	0.118742	0.137927	0.0995577
					3.18472	3.42771	4.13463	2.72079					0.11581	0.118791	0.137993	0.0995886
					3.18649	3.42893	4.13604	2.72182					0.115884	0.118839	0.138059	0.0996193
					3.18826	3.43016	4.13747	2.72285					0.115957	0.118888	0.138125	0.09965
					3.19004	3.43139	4.1389	2.72388					0.11603	0.118936	0.138191	0.0996805
					3.19181	3.43261	4.14033	2.7249					0.116103	0.118984	0.138257	0.099711
					3.19358	3.43384	4.14177	2.72591					0.116177	0.119033	0.138324	0.0997413
					3.19535	3.43507	4.14321	2.72692					0.11625	0.119081	0.13839	0.0997716
					3.19713	3.43629	4.14466	2.72792					0.116323	0.119129	0.138457	0.0998017
					3.1989	3.43752	4.14612	2.72892					0.116396	0.119178	0.138524	0.0998317
					3.20067	3.43875	4.14758	2.72991					0.116469	0.119226	0.13859	0.0998617
					3.20245	3.43997	4.14904	2.7309					0.116543	0.119274	0.138657	0.0998915
					3.20422	3.4412	4.15051	2.73188					0.116616	0.119323	0.138724	0.0999212
					3.20599	3.44242	4.15199	2.73286					0.116689	0.119371	0.138791	0.0999508
					3.20777	3.44365	4.15347	2.73383					0.116762	0.119419	0.138858	0.0999804
					3.20954	3.44488	4.15496	2.7348					0.116836	0.119468	0.138926	0.10001
					3.21131	3.4461	4.15645	2.73576					0.116909	0.119516	0.138993	0.100039
					3.21308	3.44733	4.15794	2.73672					0.116982	0.119564	0.139061	0.100068
					3.21486	3.44856	4.15944	2.73767					0.117055	0.119613	0.139128	0.100097
					3.21663	3.44978	4.16095	2.73861					0.117128	0.119661	0.139196	0.100126
					3.2184	3.45101	4.16246	2.73956					0.117202	0.11971	0.139264	0.100155
					3.22018	3.45223	4.16398	2.74049					0.117275	0.119758	0.139331	0.100184
					3.22195	3.45346	4.1655	2.74142					0.117348	0.119806	0.139399	0.100213
					3.22372	3.45469	4.16703	2.74235					0.117421	0.119855	0.139468	0.100242
					3.2255	3.45591	4.16856	2.74327					0.117494	0.119903	0.139536	0.10027
					3.22727	3.45714	4.17009	2.74419					0.117568	0.119951	0.139604	0.100299
					3.22904	3.45837	4.17164	2.7451					0.117641	0.12	0.139672	0.100327
					3.23081	3.45959	4.17318	2.746					0.117714	0.120048	0.139741	0.100355
					3.23259	3.46082	4.17474	2.7469					0.117787	0.120096	0.139809	0.100383
					3.23436	3.46205	4.17629	2.7478					0.117861	0.120145	0.139878	0.100411
					3.23613	3.46327	4.17785	2.74869					0.117934	0.120193	0.139947	0.100439
					3.23791	3.4645	4.17942	2.74958					0.118007	0.120241	0.140016	0.100467
					3.23968	3.46572	4.18099	2.75046					0.11808	0.12029	0.140085	0.100495
					3.24145	3.46695	4.18257	2.75133					0.118153	0.120338	0.140154	0.100523
					3.24323	3.46818	4.18415	2.7522					0.118227	0.120386	0.140223	0.10055
					3.245	3.4694	4.18574	2.75307					0.1183	0.120435	0.140292	0.100578
					3.24677	3.47063	4.18733	2.75393					0.118373	0.120483	0.140361	0.100605
					3.24854	3.47186	4.18893	2.75478					0.118446	0.120531	0.140431	0.100632
					3.25032	3.47308	4.19053	2.75564					0.11852	0.12058	0.1405	0.100659
					3.25209	3.47431	4.19214	2.75648					0.118593	0.120628	0.14057	0.100687
					3.25386	3.47554	4.19375	2.75732					0.118666	0.120677	0.140639	0.100714
					3.25564	3.47676	4.19537	2.75816					0.118739	0.120725	0.140709	0.100741
					3.25741	3.47799	4.19699	2.75899					0.118812	0.120773	0.140779	0.100767
					3.25918	3.47921	4.19862	2.75981					0.118886	0.120822	0.140849	0.100794
					3.26096	3.48044	4.20025	2.76064					0.118959	0.12087	0.140919	0.100821
					3.26273	3.48167	4.20188	2.76145					0.119032	0.120918	0.140989	0.100847
					3.2645	3.48289	4.20353	2.76226					0.119105	0.120967	0.14106	0.100874
					3.26627	3.48412	4.20517	2.76307					0.119178	0.121015	0.14113	0.1009
					3.26805	3.48535	4.20682	2.76387					0.119252	0.121063	0.1412	0.100926
					3.26982	3.48657	4.20848	2.76467					0.119325	0.121112	0.141271	0.100953
					3.27159	3.4878	4.21014	2.76546					0.119398	0.12116	0.141342	0.100979
					3.27337	3.48903	4.21181	2.76624					0.119471	0.121208	0.141412	0.101005
					3.27514	3.49025	4.21348	2.76703					0.119545	0.121257	0.141483	0.101031
					3.27691	3.49148	4.21515	2.7678					0.119618	0.121305	0.141554	0.101056
					3.27868	3.4927	4.21683	2.76858					0.119691	0.121353	0.141625	0.101082
					3.28046	3.49393	4.21852	2.76934					0.119764	0.121402	0.141696	0.101108
					3.28223	3.49516	4.22021	2.77011					0.119837	0.12145	0.141767	0.101133
					3.284	3.49638	4.22191	2.77086					0.119911	0.121499	0.141838	0.101159
					3.28578	3.49761	4.22361	2.77162					0.119984	0.121547	0.14191	0.101184
					3.28755	3.49884	4.22531	2.77236					0.120057	0.121595	0.141981	0.101209
					3.28932	3.50006	4.22702	2.77311					0.12013	0.121644	0.142053	0.101235
					3.2911	3.50129	4.22873	2.77385					0.120204	0.121692	0.142124	0.10126
					3.29287	3.50252	4.23045	2.77458					0.120277	0.12174	0.142196	0.101285
					3.29464	3.50374	4.23218	2.77531					0.12035	0.121789	0.142268	0.10131
					3.29641	3.50497	4.23391	2.77603					0.120423	0.121837	0.142339	0.101335
					3.29819	3.50619	4.23564	2.77675					0.120496	0.121885	0.142411	0.101359
					3.29996	3.50742	4.23738	2.77747					0.12057	0.121934	0.142483	0.101384
					3.30173	3.50865	4.23912	2.77818					0.120643	0.121982	0.142555	0.101409
					3.30351	3.50987	4.24087	2.77888					0.120716	0.12203	0.142628	0.101433
					3.30528	3.5111	4.24262	2.77958					0.120789	0.122079	0.1427	0.101458
					3.30705	3.51233	4.24438	2.78028					0.120862	0.122127	0.142772	0.101482
					3.30883	3.51355	4.24614	2.78097					0.120936	0.122175	0.142845	0.101506
					3.3106	3.51478	4.2479	2.78166					0.121009	0.122224	0.142917	0.10153
					3.31237	3.51601	4.24967	2.78234					0.121082	0.122272	0.14299	0.101555
					3.31414	3.51723	4.25145	2.78301					0.121155	0.122321	0.143062	0.101579
					3.31592	3.51846	4.25323	2.78369					0.121229	0.122369	0.143135	0.101602
					3.31769	3.51968	4.25501	2.78436					0.121302	0.122417	0.143208	0.101626
					3.31946	3.52091	4.2568	2.78502					0.121375	0.122466	0.143281	0.10165
					3.32124	3.52214	4.2586	2.78568					0.121448	0.122514	0.143354	0.101674
					3.32301	3.52336	4.2604	2.78633					0.121521	0.122562	0.143427	0.101697
					3.32478	3.52459	4.2622	2.78698					0.121595	0.122611	0.1435	0.101721
					3.32656	3.52582	4.26401	2.78763					0.121668	0.122659	0.143574	0.101744
					3.32833	3.52704	4.26582	2.78827					0.121741	0.122707	0.143647	0.101768
					3.3301	3.52827	4.26764	2.7889					0.121814	0.122756	0.14372	0.101791
					3.33187	3.5295	4.26946	2.78953					0.121888	0.122804	0.143794	0.101814
					3.33365	3.53072	4.27128	2.79016					0.121961	0.122852	0.143867	0.101837
					3.33542	3.53195	4.27311	2.79078					0.122034	0.122901	0.143941	0.10186
					3.33719	3.53317	4.27495	2.7914					0.122107	0.122949	0.144015	0.101883
					3.33897	3.5344	4.27679	2.79201					0.12218	0.122997	0.144089	0.101906
					3.34074	3.53563	4.27863	2.79262					0.122254	0.123046	0.144163	0.101929
					3.34251	3.53685	4.28048	2.79323					0.122327	0.123094	0.144237	0.101952
					3.34429	3.53808	4.28233	2.79383					0.1224	0.123142	0.144311	0.101974
					3.34606	3.53931	4.28419	2.79442					0.122473	0.123191	0.144385	0.101997
					3.34783	3.54053	4.28605	2.79501					0.122546	0.123239	0.144459	0.102019
					3.3496	3.54176	4.28792	2.7956					0.12262	0.123288	0.144533	0.102042
					3.35138	3.54299	4.28979	2.79618					0.122693	0.123336	0.144608	0.102064
					3.35315	3.54421	4.29167	2.79676					0.122766	0.123384	0.144682	0.102086
					3.35492	3.54544	4.29354	2.79733					0.122839	0.123433	0.144757	0.102109
					3.3567	3.54666	4.29543	2.7979					0.122913	0.123481	0.144831	0.102131
					3.35847	3.54789	4.29732	2.79847					0.122986	0.123529	0.144906	0.102153
					3.36024	3.54912	4.29921	2.79903					0.123059	0.123578	0.144981	0.102175
					3.36202	3.55034	4.30111	2.79958					0.123132	0.123626	0.145055	0.102197
					3.36379	3.55157	4.30301	2.80013					0.123205	0.123674	0.14513	0.102218
					3.36556	3.5528	4.30491	2.80068					0.123279	0.123723	0.145205	0.10224
					3.36733	3.55402	4.30682	2.80122					0.123352	0.123771	0.14528	0.102262
					3.36911	3.55525	4.30874	2.80176					0.123425	0.123819	0.145355	0.102283
					3.37088	3.55648	4.31066	2.8023					0.123498	0.123868	0.145431	0.102305
					3.37265	3.5577	4.31258	2.80283					0.123572	0.123916	0.145506	0.102326
					3.37443	3.55893	4.31451	2.80335					0.123645	0.123964	0.145581	0.102348
					3.3762	3.56015	4.31644	2.80387					0.123718	0.124013	0.145657	0.102369
					3.37797	3.56138	4.31837	2.80439					0.123791	0.124061	0.145732	0.10239
					3.37974	3.56261	4.32031	2.8049					0.123864	0.12411	0.145808	0.102411
					3.38152	3.56383	4.32226	2.80541					0.123938	0.124158	0.145883	0.102432
					3.38329	3.56506	4.3242	2.80592					0.124011	0.124206	0.145959	0.102453
					3.38506	3.56629	4.32616	2.80642					0.124084	0.124255	0.146035	0.102474
					3.38684	3.56751	4.32811	2.80691					0.124157	0.124303	0.146111	0.102495
					3.38861	3.56874	4.33007	2.8074					0.124231	0.124351	0.146187	0.102516
					3.39038	3.56997	4.33204	2.80789					0.124304	0.1244	0.146263	0.102537
					3.39216	3.57119	4.33401	2.80838					0.124377	0.124448	0.146339	0.102557
					3.39393	3.57242	4.33598	2.80886					0.12445	0.124496	0.146415	0.102578
					3.3957	3.57364	4.33796	2.80933					0.124523	0.124545	0.146491	0.102598
					3.39747	3.57487	4.33994	2.8098					0.124597	0.124593	0.146567	0.102619
					3.39925	3.5761	4.34193	2.81027					0.12467	0.124641	0.146644	0.102639
					3.40102	3.57732	4.34392	2.81073					0.124743	0.12469	0.14672	0.102659
					3.40279	3.57855	4.34591	2.81119					0.124816	0.124738	0.146797	0.10268
					3.40457	3.57978	4.34791	2.81165					0.124889	0.124786	0.146873	0.1027
					3.40634	3.581	4.34991	2.8121					0.124963	0.124835	0.14695	0.10272
					3.40811	3.58223	4.35192	2.81254					0.125036	0.124883	0.147026	0.10274
					3.40989	3.58346	4.35393	2.81299					0.125109	0.124932	0.147103	0.10276
					3.41166	3.58468	4.35594	2.81343					0.125182	0.12498	0.14718	0.10278
					3.41343	3.58591	4.35796	2.81386					0.125256	0.125028	0.147257	0.1028
					3.4152	3.58713	4.35998	2.81429					0.125329	0.125077	0.147334	0.102819
					3.41698	3.58836	4.362	2.81472					0.125402	0.125125	0.147411	0.102839
					3.41875	3.58959	4.36403	2.81514					0.125475	0.125173	0.147488	0.102859
					3.42052	3.59081	4.36607	2.81556					0.125548	0.125222	0.147565	0.102878
					3.4223	3.59204	4.36811	2.81597					0.125622	0.12527	0.147642	0.102898
					3.42407	3.59327	4.37015	2.81639					0.125695	0.125318	0.14772	0.102917
					3.42584	3.59449	4.37219	2.81679					0.125768	0.125367	0.147797	0.102936
					3.42762	3.59572	4.37424	2.8172					0.125841	0.125415	0.147874	0.102956
					3.42939	3.59695	4.3763	2.8176					0.125915	0.125463	0.147952	0.102975
					3.43116	3.59817	4.37835	2.81799					0.125988	0.125512	0.148029	0.102994
					3.43293	3.5994	4.38041	2.81838					0.126061	0.12556	0.148107	0.103013
					3.43471	3.60062	4.38248	2.81877					0.126134	0.125608	0.148185	0.103032
					3.43648	3.60185	4.38455	2.81915					0.126207	0.125657	0.148262	0.103051
					3.43825	3.60308	4.38662	2.81953					0.126281	0.125705	0.14834	0.10307
					3.44003	3.6043	4.3887	2.81991					0.126354	0.125753	0.148418	0.103089
					3.4418	3.60553	4.39078	2.82028					0.126427	0.125802	0.148496	0.103108
					3.44357	3.60676	4.39286	2.82065					0.1265	0.12585	0.148574	0.103126
					3.44535	3.60798	4.39495	2.82102					0.126573	0.125899	0.148652	0.103145
					3.44712	3.60921	4.39704	2.82138					0.126647	0.125947	0.14873	0.103164
					3.44889	3.61044	4.39914	2.82173					0.12672	0.125995	0.148808	0.103182
					3.45066	3.61166	4.40124	2.82209					0.126793	0.126044	0.148887	0.103201
					3.45244	3.61289	4.40334	2.82244					0.126866	0.126092	0.148965	0.103219
					3.45421	3.61411	4.40545	2.82278					0.12694	0.12614	0.149043	0.103237
					3.45598	3.61534	4.40756	2.82313					0.127013	0.126189	0.149122	0.103256
					3.45776	3.61657	4.40967	2.82347					0.127086	0.126237	0.1492	0.103274
					3.45953	3.61779	4.41179	2.8238					0.127159	0.126285	0.149279	0.103292
					3.4613	3.61902	4.41391	2.82413					0.127232	0.126334	0.149357	0.10331
					3.46308	3.62025	4.41603	2.82446					0.127306	0.126382	0.149436	0.103328
					3.46485	3.62147	4.41816	2.82478					0.127379	0.12643	0.149515	0.103346
					3.46662	3.6227	4.42029	2.8251					0.127452	0.126479	0.149594	0.103364
					3.46839	3.62393	4.42243	2.82542					0.127525	0.126527	0.149673	0.103382
					3.47017	3.62515	4.42457	2.82573					0.127599	0.126575	0.149751	0.1034
					3.47194	3.62638	4.42671	2.82604					0.127672	0.126624	0.14983	0.103417
					3.47371	3.6276	4.42886	2.82635					0.127745	0.126672	0.149909	0.103435
					3.47549	3.62883	4.43101	2.82665					0.127818	0.126721	0.149989	0.103453
					3.47726	3.63006	4.43316	2.82695					0.127891	0.126769	0.150068	0.10347
					3.47903	3.63128	4.43532	2.82725					0.127965	0.126817	0.150147	0.103488
					3.4808	3.63251	4.43748	2.82754					0.128038	0.126866	0.150226	0.103505
					3.48258	3.63374	4.43965	2.82783					0.128111	0.126914	0.150306	0.103522
					3.48435	3.63496	4.44181	2.82811					0.128184	0.126962	0.150385	0.10354
					3.48612	3.63619	4.44399	2.82839					0.128257	0.127011	0.150464	0.103557
					3.4879	3.63742	4.44616	2.82867					0.128331	0.127059	0.150544	0.103574
					3.48967	3.63864	4.44834	2.82895					0.128404	0.127107	0.150623	0.103591
					3.49144	3.63987	4.45052	2.82922					0.128477	0.127156	0.150703	0.103608
					3.49322	3.64109	4.45271	2.82948					0.12855	0.127204	0.150783	0.103625
					3.49499	3.64232	4.45489	2.82975					0.128624	0.127252	0.150862	0.103642
					3.49676	3.64355	4.45709	2.83001					0.128697	0.127301	0.150942	0.103659
					3.49853	3.64477	4.45928	2.83027					0.12877	0.127349	0.151022	0.103676
					3.50031	3.646	4.46148	2.83052					0.128843	0.127397	0.151102	0.103693
					3.50208	3.64723	4.46368	2.83077					0.128916	0.127446	0.151182	0.10371
					3.50385	3.64845	4.46589	2.83102					0.12899	0.127494	0.151262	0.103726
					3.50563	3.64968	4.4681	2.83126					0.129063	0.127543	0.151342	0.103743
					3.5074	3.65091	4.47031	2.8315					0.129136	0.127591	0.151422	0.10376
					3.50917	3.65213	4.47253	2.83174					0.129209	0.127639	0.151502	0.103776
					3.51095	3.65336	4.47475	2.83197					0.129283	0.127688	0.151582	0.103793
					3.51272	3.65458	4.47697	2.8322					0.129356	0.127736	0.151663	0.103809
					3.51449	3.65581	4.47919	2.83243					0.129429	0.127784	0.151743	0.103825
					3.51626	3.65704	4.48142	2.83265					0.129502	0.127833	0.151823	0.103842
					3.51804	3.65826	4.48365	2.83287					0.129575	0.127881	0.151904	0.103858
					3.51981	3.65949	4.48589	2.83309					0.129649	0.127929	0.151984	0.103874
					3.52158	3.66072	4.48813	2.8333					0.129722	0.127978	0.152065	0.10389
					3.52336	3.66194	4.49037	2.83352					0.129795	0.128026	0.152146	0.103907
					3.52513	3.66317	4.49262	2.83372					0.129868	0.128074	0.152226	0.103923
					3.5269	3.6644	4.49486	2.83393					0.129941	0.128123	0.152307	0.103939
					3.52868	3.66562	4.49712	2.83413					0.130015	0.128171	0.152388	0.103955
					3.53045	3.66685	4.49937	2.83433					0.130088	0.128219	0.152468	0.10397
					3.53222	3.66807	4.50163	2.83452					0.130161	0.128268	0.152549	0.103986
					3.53399	3.6693	4.50389	2.83471					0.130234	0.128316	0.15263	0.104002
					3.53577	3.67053	4.50615	2.8349					0.130308	0.128365	0.152711	0.104018
					3.53754	3.67175	4.50842	2.83509					0.130381	0.128413	0.152792	0.104033
					3.53931	3.67298	4.51069	2.83527					0.130454	0.128461	0.152873	0.104049
					3.54109	3.67421	4.51297	2.83545					0.130527	0.12851	0.152954	0.104065
					3.54286	3.67543	4.51524	2.83562					0.1306	0.128558	0.153036	0.10408
					3.54463	3.67666	4.51752	2.8358					0.130674	0.128606	0.153117	0.104096
					3.54641	3.67789	4.51981	2.83597					0.130747	0.128655	0.153198	0.104111
					3.54818	3.67911	4.52209	2.83613					0.13082	0.128703	0.153279	0.104127
					3.54995	3.68034	4.52438	2.8363					0.130893	0.128751	0.153361	0.104142
					3.55172	3.68156	4.52667	2.83646					0.130967	0.1288	0.153442	0.104157
					3.5535	3.68279	4.52897	2.83661					0.13104	0.128848	0.153524	0.104172
					3.55527	3.68402	4.53127	2.83677					0.131113	0.128896	0.153605	0.104188
					3.55704	3.68524	4.53357	2.83692					0.131186	0.128945	0.153687	0.104203
					3.55882	3.68647	4.53587	2.83707					0.131259	0.128993	0.153768	0.104218
					3.56059	3.6877	4.53818	2.83721					0.131333	0.129041	0.15385	0.104233
					3.56236	3.68892	4.54049	2.83736					0.131406	0.12909	0.153932	0.104248
					3.56414	3.69015	4.5428	2.8375					0.131479	0.129138	0.154013	0.104263
					3.56591	3.69138	4.54512	2.83763					0.131552	0.129186	0.154095	0.104278
					3.56768	3.6926	4.54744	2.83777					0.131626	0.129235	0.154177	0.104293
					3.56945	3.69383	4.54976	2.8379					0.131699	0.129283	0.154259	0.104307
					3.57123	3.69505	4.55209	2.83802					0.131772	0.129332	0.154341	0.104322
					3.573	3.69628	4.55441	2.83815					0.131845	0.12938	0.154423	0.104337
					3.57477	3.69751	4.55675	2.83827					0.131918	0.129428	0.154505	0.104351
					3.57655	3.69873	4.55908	2.83839					0.131992	0.129477	0.154587	0.104366
					3.57832	3.69996	4.56142	2.83851					0.132065	0.129525	0.154669	0.104381
					3.58009	3.70119	4.56376	2.83862					0.132138	0.129573	0.154751	0.104395
					3.58186	3.70241	4.5661	2.83873					0.132211	0.129622	0.154834	0.10441
					3.58364	3.70364	4.56844	2.83884					0.132284	0.12967	0.154916	0.104424
					3.58541	3.70487	4.57079	2.83894					0.132358	0.129718	0.154998	0.104438
					3.58718	3.70609	4.57314	2.83904					0.132431	0.129767	0.155081	0.104453
					3.58896	3.70732	4.5755	2.83914					0.132504	0.129815	0.155163	0.104467
					3.59073	3.70854	4.57785	2.83924					0.132577	0.129863	0.155245	0.104481
					3.5925	3.70977	4.58021	2.83933					0.132651	0.129912	0.155328	0.104496
					3.59428	3.711	4.58257	2.83942					0.132724	0.12996	0.155411	0.10451
					3.59605	3.71222	4.58494	2.83951					0.132797	0.130008	0.155493	0.104524
					3.59782	3.71345	4.58731	2.83959					0.13287	0.130057	0.155576	0.104538
					3.59959	3.71468	4.58968	2.83968					0.132943	0.130105	0.155658	0.104552
					3.60137	3.7159	4.59205	2.83976					0.133017	0.130154	0.155741	0.104566
					3.60314	3.71713	4.59443	2.83983					0.13309	0.130202	0.155824	0.10458
					3.60491	3.71836	4.5968	2.83991					0.133163	0.13025	0.155907	0.104594
					3.60669	3.71958	4.59919	2.83998					0.133236	0.130299	0.15599	0.104608
					3.60846	3.72081	4.60157	2.84005					0.13331	0.130347	0.156073	0.104621
					3.61023	3.72203	4.60396	2.84011					0.133383	0.130395	0.156155	0.104635
					3.61201	3.72326	4.60635	2.84018					0.133456	0.130444	0.156238	0.104649
					3.61378	3.72449	4.60874	2.84024					0.133529	0.130492	0.156321	0.104662
					3.61555	3.72571	4.61113	2.8403					0.133602	0.13054	0.156405	0.104676
					3.61732	3.72694	4.61353	2.84035					0.133676	0.130589	0.156488	0.10469
					3.6191	3.72817	4.61593	2.8404					0.133749	0.130637	0.156571	0.104703
					3.62087	3.72939	4.61833	2.84045					0.133822	0.130685	0.156654	0.104717
					3.62264	3.73062	4.62074	2.8405					0.133895	0.130734	0.156737	0.10473
					3.62442	3.73185	4.62315	2.84055					0.133968	0.130782	0.156821	0.104744
					3.62619	3.73307	4.62556	2.84059					0.134042	0.13083	0.156904	0.104757
					3.62796	3.7343	4.62797	2.84063					0.134115	0.130879	0.156987	0.10477
					3.62974	3.73552	4.63038	2.84067					0.134188	0.130927	0.157071	0.104784
					3.63151	3.73675	4.6328	2.8407					0.134261	0.130976	0.157154	0.104797
					3.63328	3.73798	4.63522	2.84073					0.134335	0.131024	0.157238	0.10481
					3.63505	3.7392	4.63765	2.84076					0.134408	0.131072	0.157321	0.104823
					3.63683	3.74043	4.64007	2.84079					0.134481	0.131121	0.157405	0.104836
					3.6386	3.74166	4.6425	2.84081					0.134554	0.131169	0.157488	0.104849
					3.64037	3.74288	4.64493	2.84084					0.134627	0.131217	0.157572	0.104863
					3.64215	3.74411	4.64736	2.84085					0.134701	0.131266	0.157656	0.104876
					3.64392	3.74534	4.6498	2.84087					0.134774	0.131314	0.157739	0.104888
					3.64569	3.74656	4.65224	2.84089					0.134847	0.131362	0.157823	0.104901
					3.64747	3.74779	4.65468	2.8409					0.13492	0.131411	0.157907	0.104914
					3.64924	3.74901	4.65712	2.84091					0.134994	0.131459	0.157991	0.104927
					3.65101	3.75024	4.65957	2.84091					0.135067	0.131507	0.158075	0.10494
					3.65278	3.75147	4.66202	2.84092					0.13514	0.131556	0.158159	0.104953
					3.65456	3.75269	4.66447	2.84092					0.135213	0.131604	0.158243	0.104965
					3.65633	3.75392	4.66692	2.84092					0.135286	0.131652	0.158327	0.104978
					3.6581	3.75515	4.66937	2.84092					0.13536	0.131701	0.158411	0.104991
					3.65988	3.75637	4.67183	2.84091					0.135433	0.131749	0.158495	0.105003
					3.66165	3.7576	4.67429	2.84091					0.135506	0.131797	0.158579	0.105016
					3.66342	3.75883	4.67676	2.8409					0.135579	0.131846	0.158663	0.105028
					3.6652	3.76005	4.67922	2.84088					0.135652	0.131894	0.158747	0.105041
					3.66697	3.76128	4.68169	2.84087					0.135726	0.131943	0.158832	0.105053
					3.66874	3.7625	4.68416	2.84085					0.135799	0.131991	0.158916	0.105066
					3.67051	3.76373	4.68663	2.84083					0.135872	0.132039	0.159	0.105078
					3.67229	3.76496	4.6891	2.84081					0.135945	0.132088	0.159085	0.105091
					3.67406	3.76618	4.69158	2.84079					0.136019	0.132136	0.159169	0.105103
					3.67583	3.76741	4.69406	2.84076					0.136092	0.132184	0.159253	0.105115
					3.67761	3.76864	4.69654	2.84073					0.136165	0.132233	0.159338	0.105127
					3.67938	3.76986	4.69902	2.8407					0.136238	0.132281	0.159422	0.10514
					3.68115	3.77109	4.70151	2.84067					0.136311	0.132329	0.159507	0.105152
					3.68292	3.77232	4.704	2.84063					0.136385	0.132378	0.159592	0.105164
					3.6847	3.77354	4.70649	2.8406					0.136458	0.132426	0.159676	0.105176
					3.68647	3.77477	4.70898	2.84056					0.136531	0.132474	0.159761	0.105188
					3.68824	3.77599	4.71148	2.84051					0.136604	0.132523	0.159846	0.1052
					3.69002	3.77722	4.71397	2.84047					0.136678	0.132571	0.15993	0.105212
					3.69179	3.77845	4.71647	2.84042					0.136751	0.132619	0.160015	0.105224
					3.69356	3.77967	4.71897	2.84037					0.136824	0.132668	0.1601	0.105236
					3.69534	3.7809	4.72148	2.84032					0.136897	0.132716	0.160185	0.105248
					3.69711	3.78213	4.72398	2.84027					0.13697	0.132765	0.16027	0.10526
					3.69888	3.78335	4.72649	2.84021					0.137044	0.132813	0.160354	0.105271
					3.70065	3.78458	4.729	2.84016					0.137117	0.132861	0.160439	0.105283
					3.70243	3.78581	4.73152	2.8401					0.13719	0.13291	0.160524	0.105295
					3.7042	3.78703	4.73403	2.84003					0.137263	0.132958	0.160609	0.105306
					3.70597	3.78826	4.73655	2.83997					0.137336	0.133006	0.160694	0.105318
					3.70775	3.78948	4.73907	2.8399					0.13741	0.133055	0.16078	0.10533
					3.70952	3.79071	4.74159	2.83984					0.137483	0.133103	0.160865	0.105341
					3.71129	3.79194	4.74411	2.83976					0.137556	0.133151	0.16095	0.105353
					3.71307	3.79316	4.74664	2.83969					0.137629	0.1332	0.161035	0.105364
					3.71484	3.79439	4.74916	2.83962					0.137703	0.133248	0.16112	0.105376
					3.71661	3.79562	4.75169	2.83954					0.137776	0.133296	0.161205	0.105387
					3.71838	3.79684	4.75423	2.83946					0.137849	0.133345	0.161291	0.105399
					3.72016	3.79807	4.75676	2.83938					0.137922	0.133393	0.161376	0.10541
					3.72193	3.7993	4.7593	2.8393					0.137995	0.133441	0.161461	0.105421
					3.7237	3.80052	4.76183	2.83921					0.138069	0.13349	0.161547	0.105433
					3.72548	3.80175	4.76437	2.83912					0.138142	0.133538	0.161632	0.105444
					3.72725	3.80297	4.76692	2.83903					0.138215	0.133587	0.161718	0.105455
					3.72902	3.8042	4.76946	2.83894					0.138288	0.133635	0.161803	0.105467
					3.7308	3.80543	4.77201	2.83885					0.138362	0.133683	0.161889	0.105478
					3.73257	3.80665	4.77455	2.83875					0.138435	0.133732	0.161974	0.105489
					3.73434	3.80788	4.7771	2.83866					0.138508	0.13378	0.16206	0.1055
					3.73611	3.80911	4.77966	2.83856					0.138581	0.133828	0.162145	0.105511
					3.73789	3.81033	4.78221	2.83845					0.138654	0.133877	0.162231	0.105522
					3.73966	3.81156	4.78477	2.83835					0.138728	0.133925	0.162317	0.105533
					3.74143	3.81279	4.78733	2.83825					0.138801	0.133973	0.162403	0.105544
					3.74321	3.81401	4.78989	2.83814					0.138874	0.134022	0.162488	0.105555
					3.74498	3.81524	4.79245	2.83803					0.138947	0.13407	0.162574	0.105566
					3.74675	3.81646	4.79501	2.83792					0.139021	0.134118	0.16266	0.105577
					3.74853	3.81769	4.79758	2.8378					0.139094	0.134167	0.162746	0.105588
					3.7503	3.81892	4.80015	2.83769					0.139167	0.134215	0.162832	0.105599
					3.75207	3.82014	4.80272	2.83757					0.13924	0.134263	0.162918	0.105609
					3.75384	3.82137	4.80529	2.83745					0.139313	0.134312	0.163003	0.10562
					3.75562	3.8226	4.80786	2.83733					0.139387	0.13436	0.163089	0.105631
					3.75739	3.82382	4.81044	2.83721					0.13946	0.134408	0.163175	0.105642
					3.75916	3.82505	4.81302	2.83708					0.139533	0.134457	0.163261	0.105652
					3.76094	3.82628	4.8156	2.83695					0.139606	0.134505	0.163348	0.105663
					3.76271	3.8275	4.81818	2.83683					0.139679	0.134554	0.163434	0.105673
					3.76448	3.82873	4.82076	2.83669					0.139753	0.134602	0.16352	0.105684
					3.76626	3.82995	4.82335	2.83656					0.139826	0.13465	0.163606	0.105695
					3.76803	3.83118	4.82594	2.83643					0.139899	0.134699	0.163692	0.105705
					3.7698	3.83241	4.82852	2.83629					0.139972	0.134747	0.163778	0.105716
					3.77157	3.83363	4.83112	2.83615					0.140046	0.134795	0.163865	0.105726
					3.77335	3.83486	4.83371	2.83601					0.140119	0.134844	0.163951	0.105736
					3.77512	3.83609	4.8363	2.83587					0.140192	0.134892	0.164037	0.105747
					3.77689	3.83731	4.8389	2.83573					0.140265	0.13494	0.164124	0.105757
					3.77867	3.83854	4.8415	2.83558					0.140338	0.134989	0.16421	0.105768
					3.78044	3.83977	4.8441	2.83543					0.140412	0.135037	0.164296	0.105778
					3.78221	3.84099	4.8467	2.83528					0.140485	0.135085	0.164383	0.105788
					3.78399	3.84222	4.8493	2.83513					0.140558	0.135134	0.164469	0.105798
					3.78576	3.84344	4.85191	2.83498					0.140631	0.135182	0.164556	0.105809
					3.78753	3.84467	4.85452	2.83483					0.140705	0.13523	0.164642	0.105819
					3.7893	3.8459	4.85713	2.83467					0.140778	0.135279	0.164729	0.105829
					3.79108	3.84712	4.85974	2.83451					0.140851	0.135327	0.164815	0.105839
					3.79285	3.84835	4.86235	2.83435					0.140924	0.135376	0.164902	0.105849
					3.79462	3.84958	4.86496	2.83419					0.140997	0.135424	0.164989	0.105859
					3.7964	3.8508	4.86758	2.83403					0.141071	0.135472	0.165075	0.105869
					3.79817	3.85203	4.8702	2.83386					0.141144	0.135521	0.165162	0.105879
					3.79994	3.85326	4.87282	2.83369					0.141217	0.135569	0.165249	0.105889
					3.80171	3.85448	4.87544	2.83352					0.14129	0.135617	0.165335	0.105899
					3.80349	3.85571	4.87806	2.83335					0.141363	0.135666	0.165422	0.105909
					3.80526	3.85693	4.88069	2.83318					0.141437	0.135714	0.165509	0.105919
					3.80703	3.85816	4.88331	2.83301					0.14151	0.135762	0.165596	0.105929
					3.80881	3.85939	4.88594	2.83283					0.141583	0.135811	0.165683	0.105939
					3.81058	3.86061	4.88857	2.83266					0.141656	0.135859	0.165769	0.105949
					3.81235	3.86184	4.8912	2.83248					0.14173	0.135907	0.165856	0.105958
					3.81413	3.86307	4.89384	2.8323					0.141803	0.135956	0.165943	0.105968
					3.8159	3.86429	4.89647	2.83211					0.141876	0.136004	0.16603	0.105978
					3.81767	3.86552	4.89911	2.83193					0.141949	0.136052	0.166117	0.105988
					3.81944	3.86675	4.90175	2.83174					0.142022	0.136101	0.166204	0.105997
					3.82122	3.86797	4.90439	2.83156					0.142096	0.136149	0.166291	0.106007
					3.82299	3.8692	4.90703	2.83137					0.142169	0.136198	0.166378	0.106017
					3.82476	3.87042	4.90967	2.83118					0.142242	0.136246	0.166466	0.106026
					3.82654	3.87165	4.91232	2.83098					0.142315	0.136294	0.166553	0.106036
					3.82831	3.87288	4.91496	2.83079					0.142389	0.136343	0.16664	0.106045
					3.83008	3.8741	4.91761	2.83059					0.142462	0.136391	0.166727	0.106055
					3.83186	3.87533	4.92026	2.8304					0.142535	0.136439	0.166814	0.106064
					3.83363	3.87656	4.92291	2.8302					0.142608	0.136488	0.166901	0.106074
					3.8354	3.87778	4.92557	2.83					0.142681	0.136536	0.166989	0.106083
					3.83717	3.87901	4.92822	2.8298					0.142755	0.136584	0.167076	0.106093
					3.83895	3.88024	4.93088	2.82959					0.142828	0.136633	0.167163	0.106102
					3.84072	3.88146	4.93354	2.82939					0.142901	0.136681	0.167251	0.106111
					3.84249	3.88269	4.9362	2.82918					0.142974	0.136729	0.167338	0.106121
					3.84427	3.88391	4.93886	2.82897					0.143047	0.136778	0.167425	0.10613
					3.84604	3.88514	4.94152	2.82876					0.143121	0.136826	0.167513	0.106139
					3.84781	3.88637	4.94418	2.82855					0.143194	0.136874	0.1676	0.106149
					3.84959	3.88759	4.94685	2.82834					0.143267	0.136923	0.167688	0.106158
					3.85136	3.88882	4.94952	2.82812					0.14334	0.136971	0.167775	0.106167
					3.85313	3.89005	4.95218	2.82791					0.143414	0.137019	0.167863	0.106176
					3.8549	3.89127	4.95485	2.82769					0.143487	0.137068	0.16795	0.106185
					3.85668	3.8925	4.95753	2.82747					0.14356	0.137116	0.168038	0.106195
					3.85845	3.89373	4.9602	2.82725					0.143633	0.137165	0.168125	0.106204
					3.86022	3.89495	4.96287	2.82703					0.143706	0.137213	0.168213	0.106213
					3.862	3.89618	4.96555	2.82681					0.14378	0.137261	0.168301	0.106222
					3.86377	3.8974	4.96823	2.82658					0.143853	0.13731	0.168388	0.106231
					3.86554	3.89863	4.97091	2.82635					0.143926	0.137358	0.168476	0.10624
					3.86732	3.89986	4.97359	2.82613					0.143999	0.137406	0.168564	0.106249
					3.86909	3.90108	4.97627	2.8259					0.144073	0.137455	0.168652	0.106258
					3.87086	3.90231	4.97896	2.82567					0.144146	0.137503	0.168739	0.106267
					3.87263	3.90354	4.98164	2.82543					0.144219	0.137551	0.168827	0.106276
					3.87441	3.90476	4.98433	2.8252					0.144292	0.1376	0.168915	0.106285
					3.87618	3.90599	4.98702	2.82496					0.144365	0.137648	0.169003	0.106293
					3.87795	3.90722	4.9897	2.82473					0.144439	0.137696	0.169091	0.106302
					3.87973	3.90844	4.9924	2.82449					0.144512	0.137745	0.169179	0.106311
					3.8815	3.90967	4.99509	2.82425					0.144585	0.137793	0.169266	0.10632
					3.88327	3.91089	4.99778	2.82401					0.144658	0.137841	0.169354	0.106329
					3.88505	3.91212	5.00048	2.82376					0.144731	0.13789	0.169442	0.106337
					3.88682	3.91335	5.00317	2.82352					0.144805	0.137938	0.16953	0.106346
					3.88859	3.91457	5.00587	2.82327					0.144878	0.137987	0.169618	0.106355
					3.89036	3.9158	5.00857	2.82303					0.144951	0.138035	0.169706	0.106363
					3.89214	3.91703	5.01127	2.82278					0.145024	0.138083	0.169794	0.106372
					3.89391	3.91825	5.01398	2.82253					0.145098	0.138132	0.169882	0.106381
					3.89568	3.91948	5.01668	2.82228					0.145171	0.13818	0.169971	0.106389
					3.89746	3.92071	5.01939	2.82203					0.145244	0.138228	0.170059	0.106398
					3.89923	3.92193	5.02209	2.82177					0.145317	0.138277	0.170147	0.106406
					3.901	3.92316	5.0248	2.82152					0.14539	0.138325	0.170235	0.106415
					3.90277	3.92438	5.02751	2.82126					0.145464	0.138373	0.170323	0.106424
					3.90455	3.92561	5.03022	2.821					0.145537	0.138422	0.170411	0.106432
					3.90632	3.92684	5.03293	2.82074					0.14561	0.13847	0.1705	0.106441
					3.90809	3.92806	5.03565	2.82048					0.145683	0.138518	0.170588	0.106449
					3.90987	3.92929	5.03836	2.82022					0.145757	0.138567	0.170676	0.106457
					3.91164	3.93052	5.04108	2.81996					0.14583	0.138615	0.170764	0.106466
					3.91341	3.93174	5.04379	2.81969					0.145903	0.138663	0.170853	0.106474
					3.91519	3.93297	5.04651	2.81943					0.145976	0.138712	0.170941	0.106483
					3.91696	3.9342	5.04923	2.81916					0.146049	0.13876	0.171029	0.106491
					3.91873	3.93542	5.05195	2.81889					0.146123	0.138809	0.171118	0.106499
					3.9205	3.93665	5.05468	2.81862					0.146196	0.138857	0.171206	0.106507
					3.92228	3.93787	5.0574	2.81835					0.146269	0.138905	0.171295	0.106516
					3.92405	3.9391	5.06013	2.81808					0.146342	0.138954	0.171383	0.106524
					3.92582	3.94033	5.06285	2.8178					0.146416	0.139002	0.171472	0.106532
					3.9276	3.94155	5.06558	2.81753					0.146489	0.13905	0.17156	0.10654
					3.92937	3.94278	5.06831	2.81725					0.146562	0.139099	0.171649	0.106549
					3.93114	3.94401	5.07104	2.81697					0.146635	0.139147	0.171737	0.106557
					3.93292	3.94523	5.07377	2.81669					0.146708	0.139195	0.171826	0.106565
					3.93469	3.94646	5.07651	2.81641					0.146782	0.139244	0.171914	0.106573
					3.93646	3.94769	5.07924	2.81613					0.146855	0.139292	0.172003	0.106581
					3.93823	3.94891	5.08198	2.81585					0.146928	0.13934	0.172092	0.106589
					3.94001	3.95014	5.08471	2.81556					0.147001	0.139389	0.17218	0.106597
					3.94178	3.95136	5.08745	2.81528					0.147074	0.139437	0.172269	0.106605
					3.94355	3.95259	5.09019	2.81499					0.147148	0.139485	0.172358	0.106613
					3.94533	3.95382	5.09293	2.8147					0.147221	0.139534	0.172446	0.106621
					3.9471	3.95504	5.09567	2.81441					0.147294	0.139582	0.172535	0.106629
					3.94887	3.95627	5.09842	2.81412					0.147367	0.139631	0.172624	0.106637
					3.95065	3.9575	5.10116	2.81383					0.147441	0.139679	0.172713	0.106645
					3.95242	3.95872	5.10391	2.81354					0.147514	0.139727	0.172801	0.106653
					3.95419	3.95995	5.10665	2.81324					0.147587	0.139776	0.17289	0.106661
					3.95596	3.96118	5.1094	2.81295					0.14766	0.139824	0.172979	0.106669
					3.95774	3.9624	5.11215	2.81265					0.147733	0.139872	0.173068	0.106677
					3.95951	3.96363	5.1149	2.81235					0.147807	0.139921	0.173157	0.106684
					3.96128	3.96485	5.11765	2.81206					0.14788	0.139969	0.173246	0.106692
					3.96306	3.96608	5.12041	2.81176					0.147953	0.140017	0.173335	0.1067
					3.96483	3.96731	5.12316	2.81145					0.148026	0.140066	0.173423	0.106708
					3.9666	3.96853	5.12592	2.81115					0.1481	0.140114	0.173512	0.106716
					3.96838	3.96976	5.12867	2.81085					0.148173	0.140162	0.173601	0.106723
					3.97015	3.97099	5.13143	2.81054					0.148246	0.140211	0.17369	0.106731
					3.97192	3.97221	5.13419	2.81024					0.148319	0.140259	0.173779	0.106739
					3.97369	3.97344	5.13695	2.80993					0.148392	0.140307	0.173868	0.106746
					3.97547	3.97467	5.13971	2.80962					0.148466	0.140356	0.173957	0.106754
					3.97724	3.97589	5.14247	2.80931					0.148539	0.140404	0.174047	0.106762
					3.97901	3.97712	5.14524	2.809					0.148612	0.140452	0.174136	0.106769
					3.98079	3.97834	5.148	2.80869					0.148685	0.140501	0.174225	0.106777
					3.98256	3.97957	5.15077	2.80838					0.148758	0.140549	0.174314	0.106784
					3.98433	3.9808	5.15353	2.80806					0.148832	0.140598	0.174403	0.106792
					3.98611	3.98202	5.1563	2.80775					0.148905	0.140646	0.174492	0.1068
					3.98788	3.98325	5.15907	2.80743					0.148978	0.140694	0.174581	0.106807
					3.98965	3.98448	5.16184	2.80711					0.149051	0.140743	0.174671	0.106815
					3.99142	3.9857	5.16461	2.80679					0.149125	0.140791	0.17476	0.106822
					3.9932	3.98693	5.16739	2.80647					0.149198	0.140839	0.174849	0.10683
					3.99497	3.98816	5.17016	2.80615					0.149271	0.140888	0.174938	0.106837
