# Supplementary figures and images for: Dendritic sodium spikes are required for long-term potentiation at distal synapses on hippocampal pyramidal neurons
Source: eLife journal article supplement (doi:10.7554/elife.06414), 2015-08-06

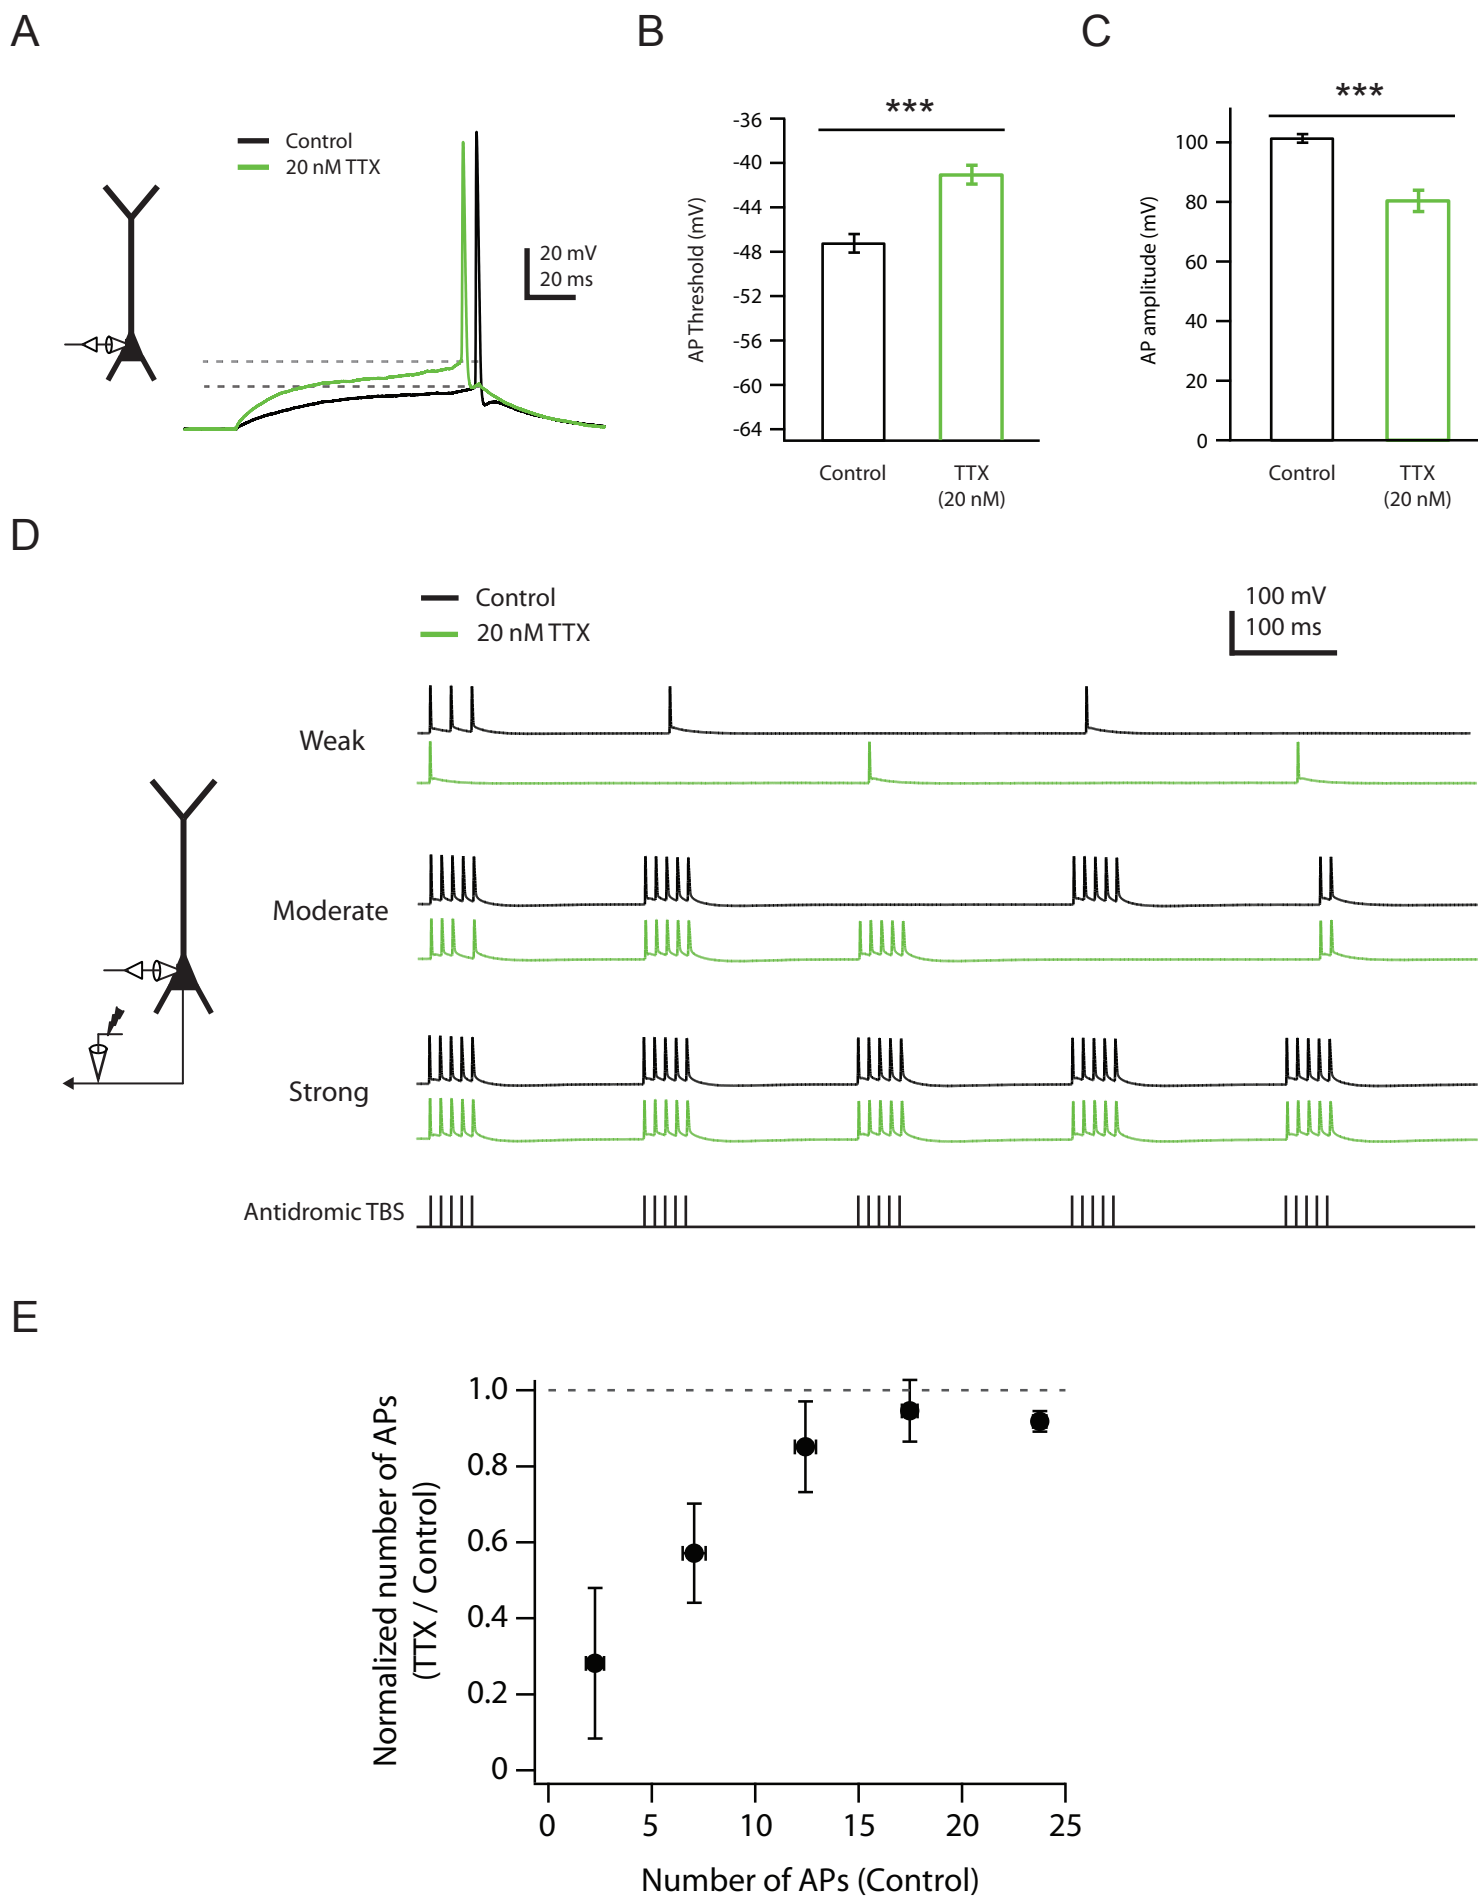

Figure 1, Suppl. 1

Supplement: supp [file elife_poa_e06414_Figure_1_figure_supplement_1.pdf › elife_poa_e06414_Figure_1_figure_supplement_1.pdf]

A1

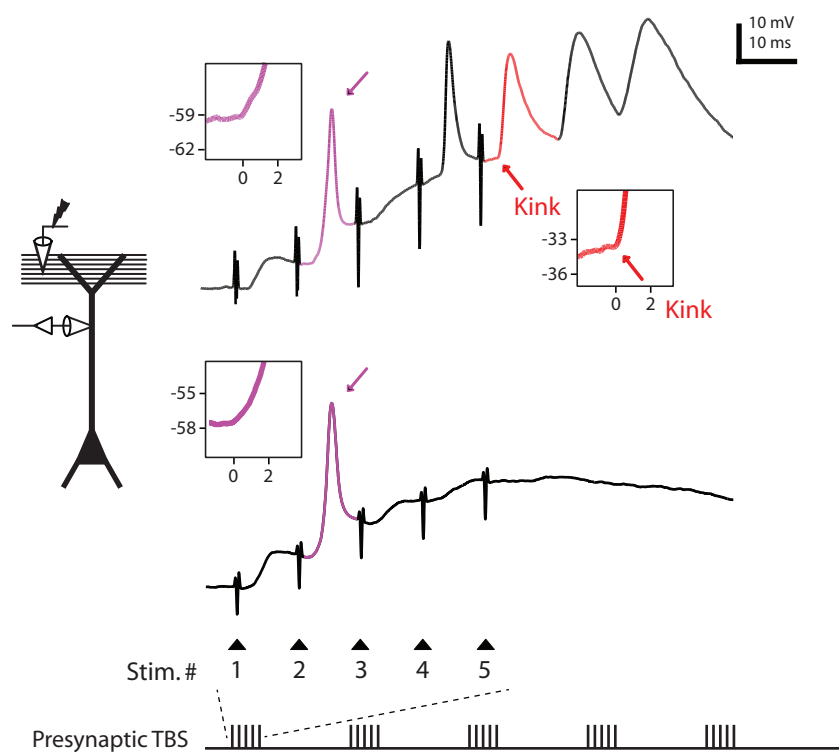

A2

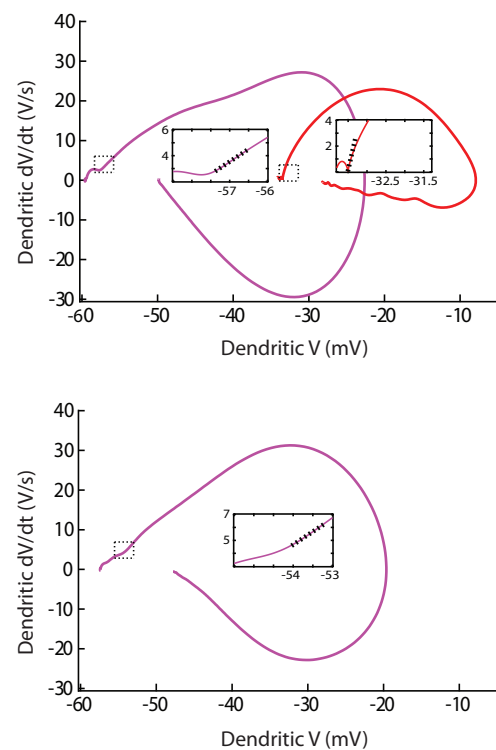

B1

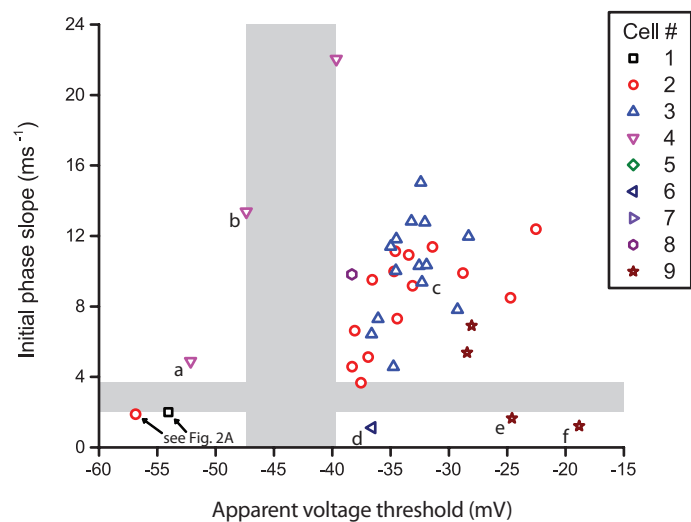

B2

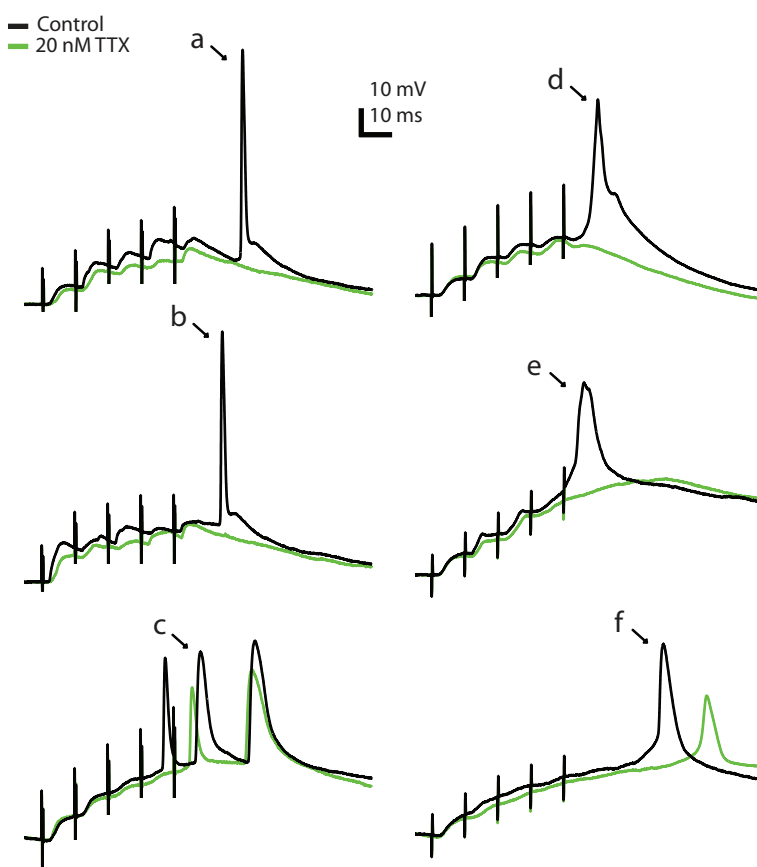

Figure 2, Suppl. 2

Supplement: supp [file elife_poa_e06414_Figure_2_figure_supplement_2.pdf › elife_poa_e06414_Figure_2_figure_supplement_2.pdf]

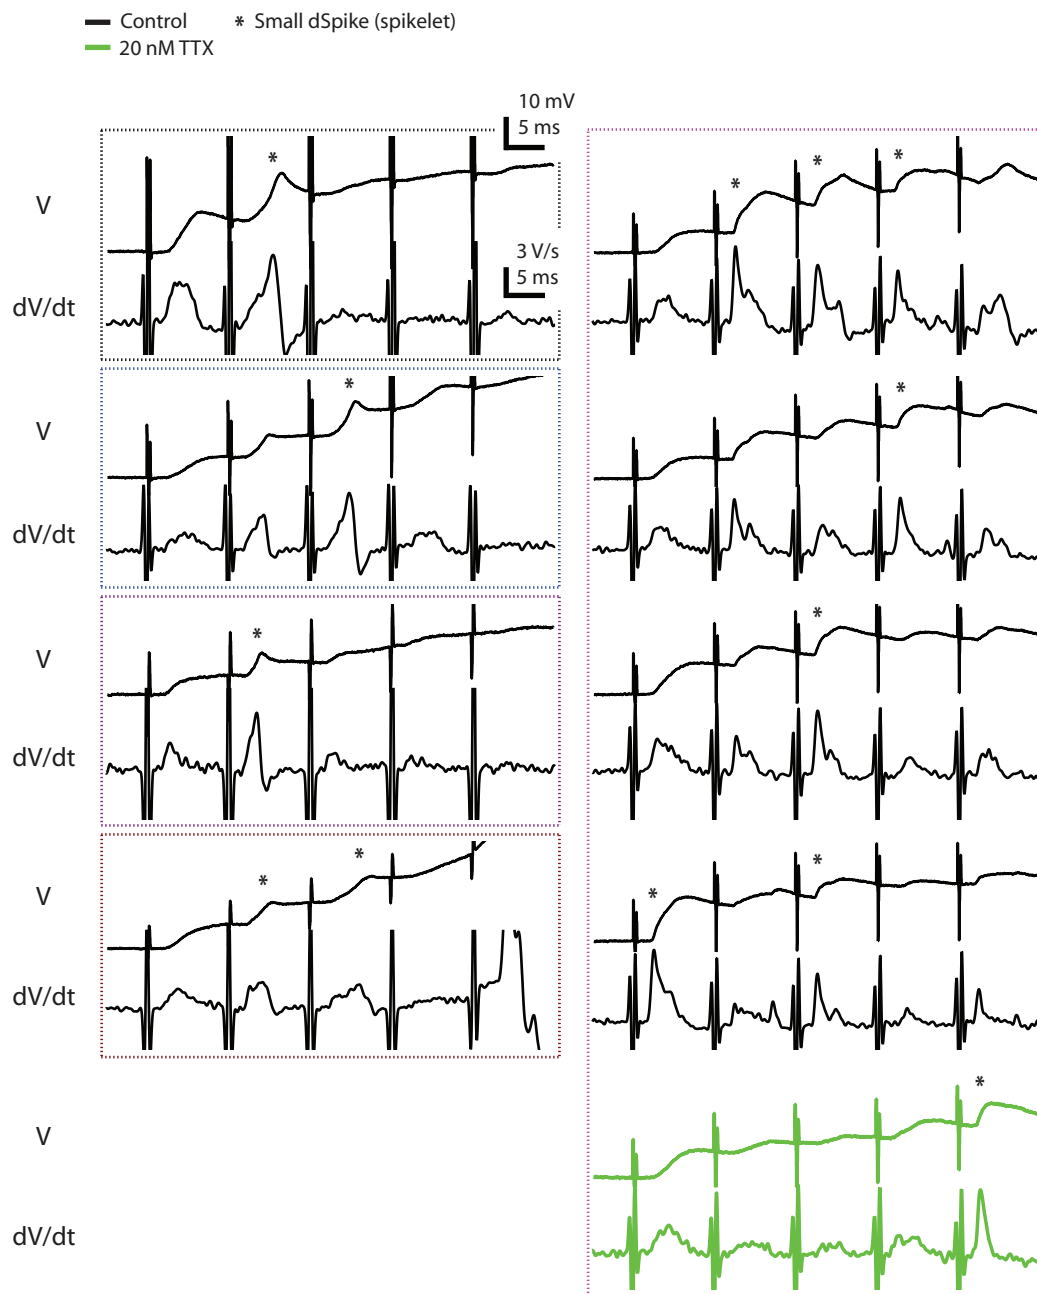

Figure 2, Suppl. 3

Supplement: supp [file elife_poa_e06414_Figure_2_figure_supplement_3.pdf › elife_poa_e06414_Figure_2_figure_supplement_3.pdf]

A

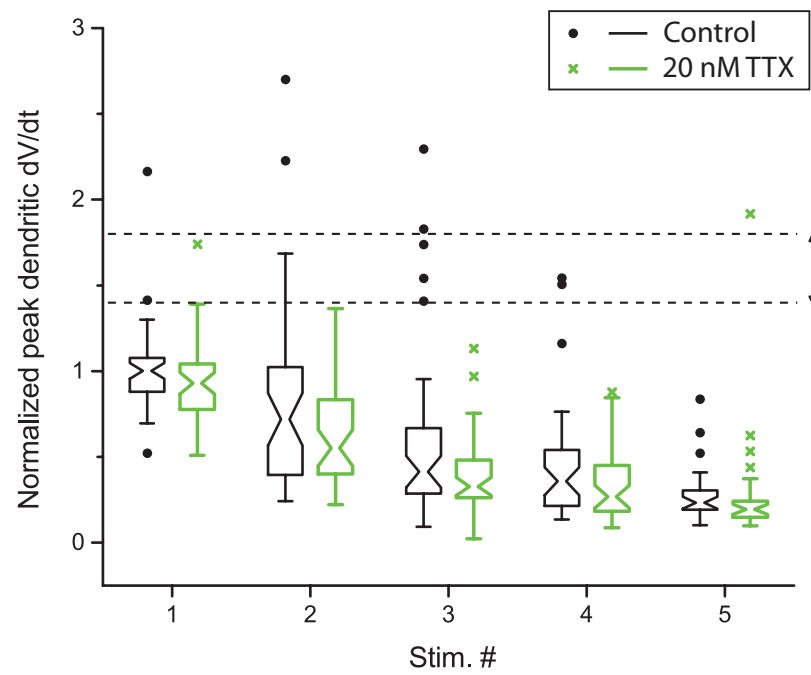

B

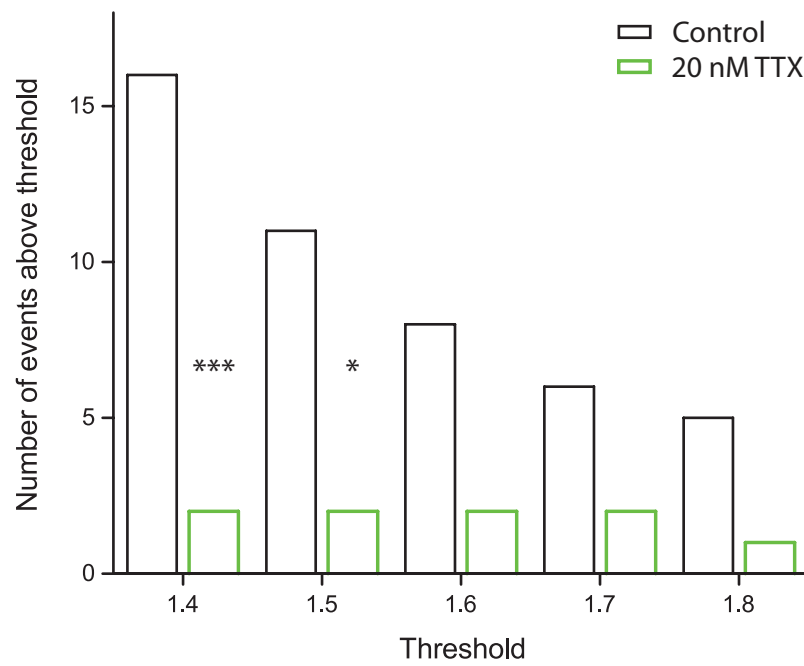

Figure 2, Suppl. 4

Supplement: supp [file elife_poa_e06414_Figure_2_figure_supplement_4.pdf › elife_poa_e06414_Figure_2_figure_supplement_4.pdf]

A

Before LTP

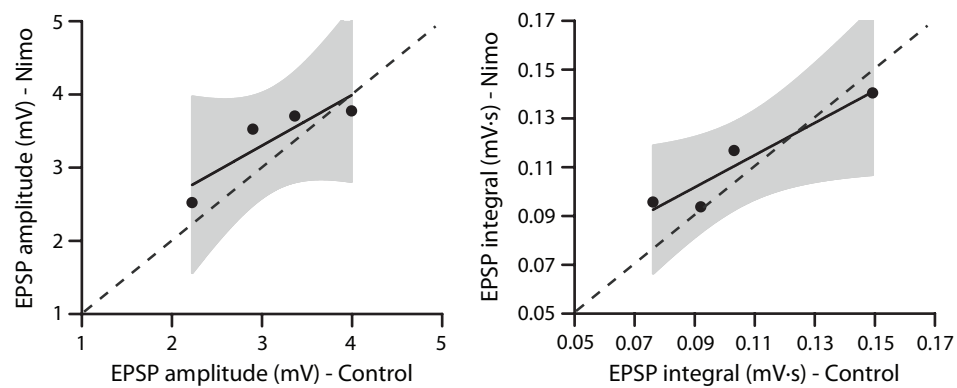

B

Before LTP

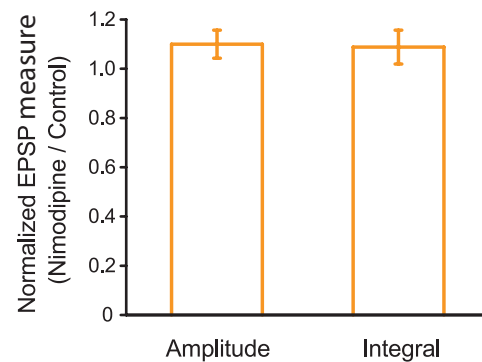

C

After LTP

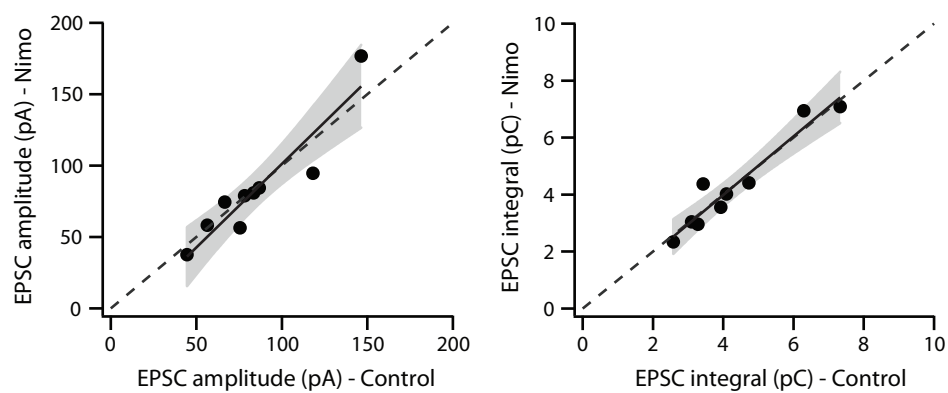

D

After LTP

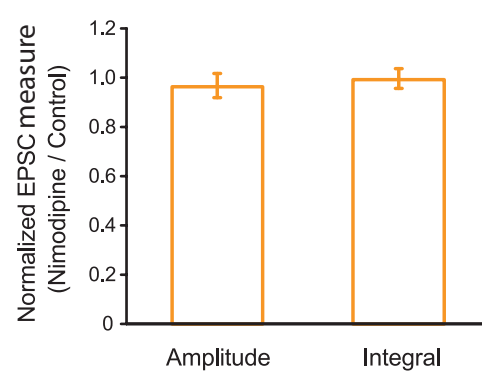

Figure 4, Suppl. 1

Supplement: supp [file elife_poa_e06414_Figure_4_figure_supplement_1.pdf › elife_poa_e06414_Figure_4_figure_supplement_1.pdf]

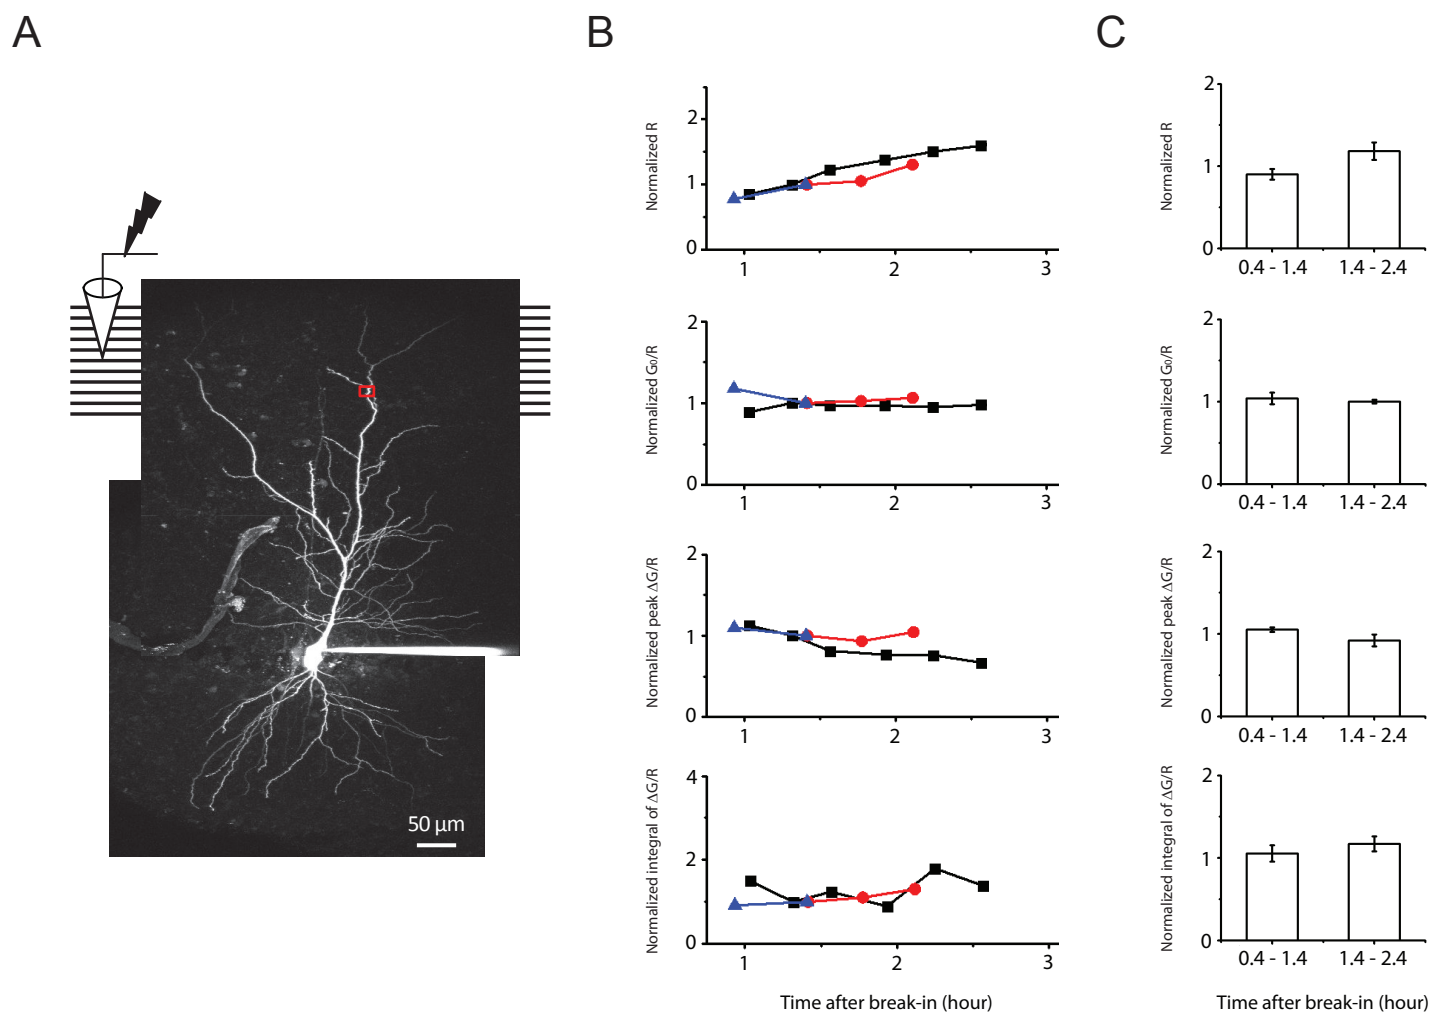

Figure 7, Suppl. 1

Supplement: supp [file elife_poa_e06414_Figure_7_figure_supplement_1.pdf › elife_poa_e06414_Figure_7_figure_supplement_1.pdf]

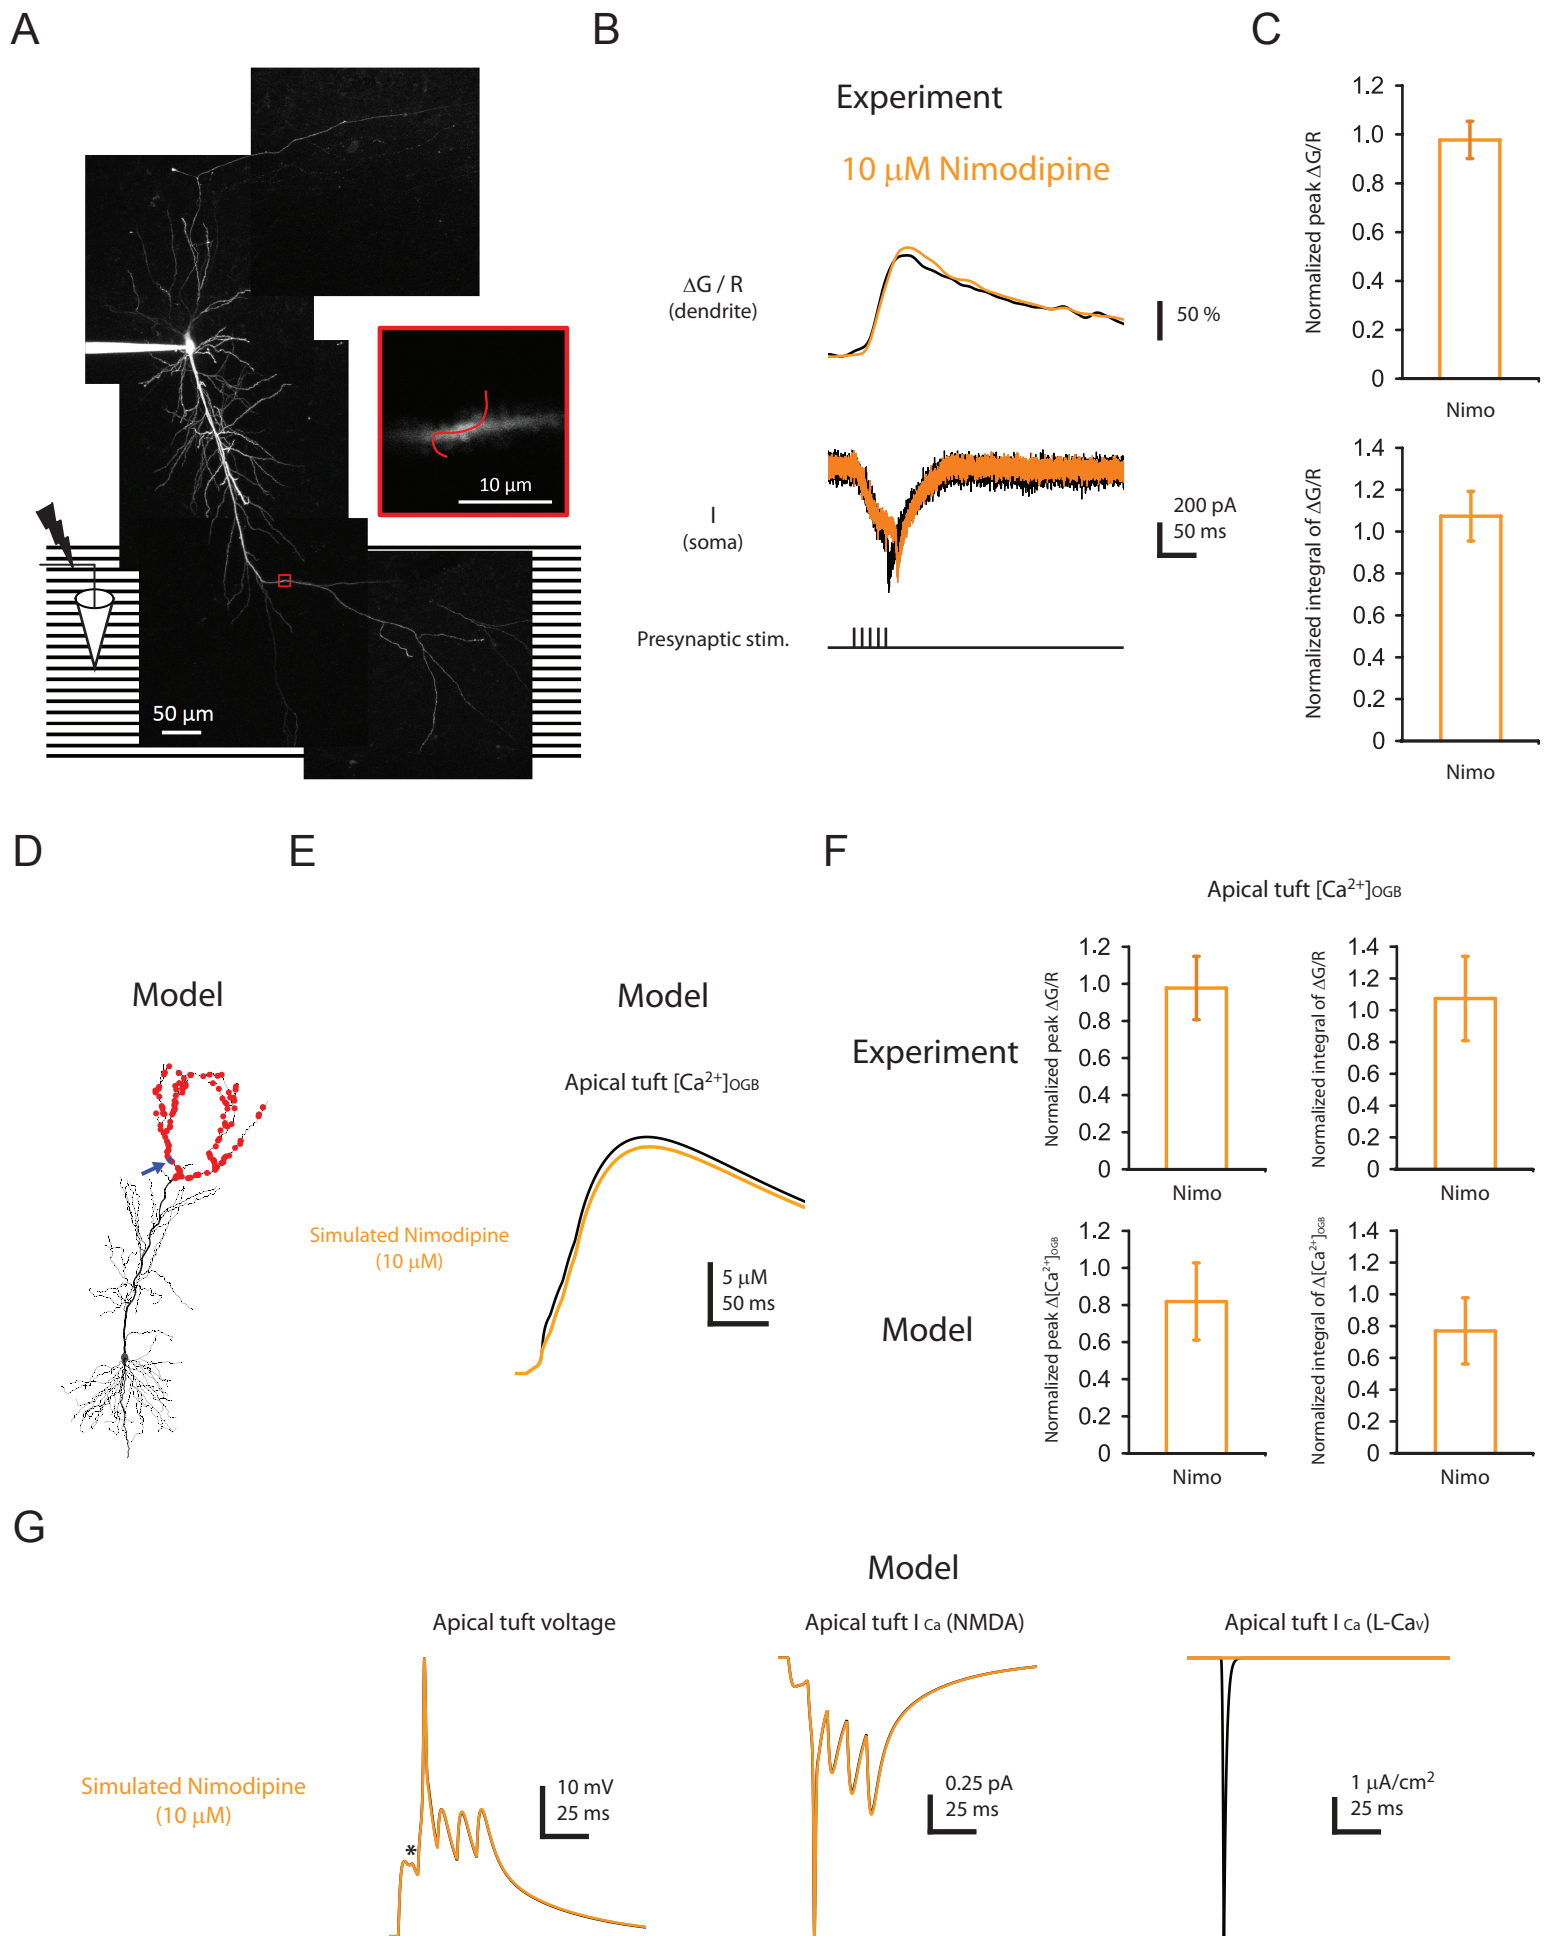

Figure 8, Suppl. 1

Supplement: supp [file elife_poa_e06414_Figure_8_figure_supplement_1.pdf › elife_poa_e06414_Figure_8_figure_supplement_1.pdf]
